# Supplementary material for: H3K27me3 epigenetic mark crucial for callus cell identity and regeneration capacity
Source: Research Square preprint supplement (doi:10.21203/rs.3.rs-5582331/v1), 2025-01-24
Supplement: Supplementary file 5 [file 56abcb89279a4a9d39115ecf.xlsx]

## Sheet: WT callus H3K27me3 marked genes
Supplementary Data 5: H3K27me3 in WT callus
columns A and B show genes associated with H3K27me3 peaks
columns C-E show peak location.
column F show peak score. H3K27me3 peaks were selected using cutoff of peak.score > 180 (peak score was calculated usin SICER program)
column G show RPKM value of expression for genes that are significantly expressed.
Gene.ID	gene.name	Chromosome	peak.start	peak.end	H3K27me3 peak.score	Callus.mean.RPKM
AT1G01030	NGATHA3 (NGA3)	Chr1	9800	15199	2526.4
AT1G01183	MICRORNA165A (MIR165A)	Chr1	77800	80799	462.716
AT1G01190	"CYTOCHROME P450, FAMILY 78, SUBFAMILY A, POLYPEPTIDE 8" (CYP78A8)	Chr1	83000	84999	705.413
AT1G01250	Integrase-type DNA-binding superfamily protein	Chr1	102800	106799	2529.45
AT1G01355	Putative endonuclease or glycosyl hydrolase	Chr1	138400	139799	286.655
AT1G01390	UDP-Glycosyltransferase superfamily protein	Chr1	148400	150399	217.182
AT1G01410	PUMILIO 22 (PUM22)	Chr1	152800	156199	1398.89
AT1G01420	UDP-GLUCOSYL TRANSFERASE 72B3 (UGT72B3)	Chr1	152800	156199	1398.89
AT1G01453	late embryogenesis abundant hydroxyproline-rich glycoprotein family protein	Chr1	167200	168199	597.168
AT1G02040	C2H2-type zinc finger family protein	Chr1	358200	358999	195.514
AT1G02065	SQUAMOSA PROMOTER BINDING PROTEIN-LIKE 8 (SPL8)	Chr1	365000	368199	4321.37
AT1G02070	zinc ion-binding protein	Chr1	370000	372399	898.799
AT1G02074		Chr1	370000	372399	898.799
AT1G02190	Fatty acid hydroxylase superfamily	Chr1	415000	419999	1573.88
AT1G02205	ECERIFERUM 1 (CER1)	Chr1	415000	419999	1573.88
AT1G02335	GERMIN-LIKE PROTEIN SUBFAMILY 2 MEMBER 2 PRECURSOR (GL22)	Chr1	463800	468799	1827.65
AT1G02340	LONG HYPOCOTYL IN FAR-RED (HFR1)	Chr1	463800	468799	1827.65
AT1G02390	GLYCEROL-3-PHOSPHATE ACYLTRANSFERASE 2 (GPAT2)	Chr1	480800	483399	917.667
AT1G02550	Plant invertase/pectin methylesterase inhibitor superfamily protein	Chr1	536400	537199	219.8
AT1G02580	MEDEA (MEA)	Chr1	545400	551599	706.256
AT1G02590	Aldehyde oxidase/xanthine dehydrogenase%2C molybdopterin binding protein	Chr1	545600	552399	396.959
AT1G02620	Ras-related small GTP-binding family protein	Chr1	557200	558799	527.759
AT1G02790	POLYGALACTURONASE 4 (PGA4)	Chr1	610400	612199	497.316
AT1G03103	Bifunctional inhibitor/lipid-transfer protein/seed storage 2S albumin superfamily protein	Chr1	747000	748999	243.686
AT1G03106	hypothetical protein	Chr1	747000	748999	243.686
AT1G03445	BRI1 SUPPRESSOR 1 (BSU1)	Chr1	856200	859999	803.763
AT1G03490	NAC DOMAIN CONTAINING PROTEIN 6 (NAC006)	Chr1	871600	872999	253.542
AT1G03710	Cystatin/monellin superfamily protein	Chr1	922200	929599	3849.76
AT1G03720	Cysteine proteinases superfamily protein	Chr1	922200	929599	3849.76
AT1G03790	SOMNUS (SOM)	Chr1	953800	955999	923.376
AT1G03840	MAGPIE (MGP)	Chr1	967000	973399	2582.18
AT1G03870	FASCICLIN-LIKE ARABINOOGALACTAN 9 (FLA9)	Chr1	982400	983599	361.376	4.96456
AT1G03880	CRUCIFERIN 2 (CRU2)	Chr1	985600	990999	1293.68
AT1G03890	RmlC-like cupins superfamily protein	Chr1	985600	990999	1293.68
AT1G04090	vacuolar sorting-associated protein (DUF946)	Chr1	1057200	1059199	625.953
AT1G04150	C2 calcium/lipid-binding plant phosphoribosyltransferase family protein	Chr1	1081800	1084399	421.934
AT1G04180	YUCCA 9 (YUC9)	Chr1	1104400	1105999	269.781
AT1G04220	3-KETOACYL-COA SYNTHASE 2 (KCS2)	Chr1	1119800	1122399	356.38	13.5034
AT1G04330	hypothetical protein	Chr1	1161400	1161999	184.581
AT1G04370	ETHYLENE-RESPONSIVE ELEMENT BINDING FACTOR 14 (ERF14)	Chr1	1174800	1177399	768.307
AT1G04380	2-oxoglutarate (2OG) and Fe(II)-dependent oxygenase superfamily protein	Chr1	1174800	1177399	768.307
AT1G04445	C2H2-like zinc finger protein	Chr1	1207000	1210799	1162.55
AT1G04450	ROP-INTERACTIVE CRIB MOTIF-CONTAINING PROTEIN 3 (RIC3)	Chr1	1207000	1210799	1162.55
AT1G04457		Chr1	1207000	1210799	1162.55
AT1G04660	glycine-rich protein	Chr1	1299200	1302999	2978.96
AT1G04670	hypothetical protein	Chr1	1299200	1302999	2978.96
AT1G05080	F-box/RNI-like/FBD-like domains-containing protein	Chr1	1459000	1460599	295.213
AT1G05085	hypothetical protein	Chr1	1459000	1461999	211.975
AT1G05230	HOMEODOMAIN GLABROUS 2 (HDG2)	Chr1	1515000	1518999	1396.05
AT1G05260	RARE COLD INDUCIBLE GENE 3 (RCI3)	Chr1	1529800	1530599	189.482
AT1G05280	ERV-F (C)1 provirus ancestral Env polyprotein%2C putative (DUF604)	Chr1	1535200	1537599	533.443
AT1G05290	CCT motif family protein	Chr1	1538600	1544199	1849.13
AT1G05291	GPI inositol-deacylase C%2C putative (DUF1218)	Chr1	1538600	1544199	1849.13
AT1G05310	Pectin lyase-like superfamily protein	Chr1	1550600	1552599	546.984
AT1G05420	OVATE FAMILY PROTEIN 12 (OFP12)	Chr1	1590000	1590799	715.487
AT1G05580	CATION/H+ EXCHANGER 23 (CHX23)	Chr1	1665400	1668999	775.329
AT1G05650	Pectin lyase-like superfamily protein	Chr1	1690200	1692399	553.516
AT1G05660	Pectin lyase-like superfamily protein	Chr1	1694200	1696399	1098.54
AT1G05800	DONGLE (DGL)	Chr1	1741000	1743799	1329.4
AT1G06080	DELTA 9 DESATURASE 1 (ADS1)	Chr1	1843400	1844399	213.461	64.5636
AT1G06135	transmembrane protein	Chr1	1862200	1864399	380.507
AT1G06137	transmembrane protein	Chr1	1862200	1864399	380.507
AT1G06280	LOB DOMAIN-CONTAINING PROTEIN 2 (LBD2)	Chr1	1920000	1921999	947.835
AT1G06320	hypothetical protein	Chr1	1930400	1932399	416.013
AT1G06330	Heavy metal transport/detoxification superfamily protein	Chr1	1930400	1932399	416.013
AT1G06340	Plant Tudor-like protein	Chr1	1933600	1937399	582.406
AT1G06350	ADS4; ATADS4; DELTA 9 DESATURASE 4	Chr1	1933600	1937399	582.406	1.43806
AT1G06360	Fatty acid desaturase family protein	Chr1	1938800	1940799	689.07
AT1G06810	endonuclease/glycosyl hydrolase	Chr1	2091600	2092799	631.665
AT1G06990	GDSL-like Lipase/Acylhydrolase superfamily protein	Chr1	2148200	2149799	848.358	3.99925
AT1G07430	HIGHLY ABA-INDUCED PP2C GENE 2 (HAI2)	Chr1	2281200	2282799	414.436	5.14282
AT1G07640	(OBP2)	Chr1	2352400	2359199	2770.83
AT1G07645	DESSICATION-INDUCED 1VOC SUPERFAMILY PROTEIN (DSI-1VOC)	Chr1	2367400	2368599	693.802
AT1G07720	3-KETOACYL-COA SYNTHASE 3 (KCS3)	Chr1	2390800	2392999	366.614	3.89829
AT1G08090	NITRATE TRANSPORTER 2:1 (NRT2:1)	Chr1	2523400	2530399	2544.86
AT1G08100	NITRATE TRANSPORTER 2.2 (NRT2.2)	Chr1	2523400	2530399	2544.86
AT1G08140	CATION/H+ EXCHANGER 6A (CHX6A)	Chr1	2553400	2559199	978.155
AT1G08150	(ATCHX5)	Chr1	2553400	2559199	978.155
AT1G08160	Late embryogenesis abundant (LEA) hydroxyproline-rich glycoprotein family	Chr1	2559600	2560599	231.343
AT1G08170	Histone superfamily protein	Chr1	2562800	2563799	257.32
AT1G08430	ALUMINUM-ACTIVATED MALATE TRANSPORTER 1 (ALMT1)	Chr1	2658600	2661199	535.173	4.897
AT1G08440	aluminum activated malate transporter family protein	Chr1	2663000	2664999	221.412	6.87381
AT1G08465	YABBY2 (YAB2)	Chr1	2675000	2681399	1839.58
AT1G08670	ENTH/VHS family protein	Chr1	2760000	2761799	430.08
AT1G08860	BONZAI 3 (BON3)	Chr1	2841600	2844199	955.395
AT1G08990	PLANT GLYCOGENIN-LIKE STARCH INITIATION PROTEIN 5 (PGSIP5)	Chr1	2888200	2890799	1715.66	1.09201
AT1G09026		Chr1	2905200	2909799	1617.55
AT1G09030	"NUCLEAR FACTOR Y, SUBUNIT B4" (NF-YB4)	Chr1	2905200	2909799	1617.55
AT1G09090	RESPIRATORY BURST OXIDASE HOMOLOG B (RBOHB)	Chr1	2932600	2935199	402.829	1.33277
AT1G09240	NICOTIANAMINE SYNTHASE 3 (NAS3)	Chr1	2984800	2986199	275.53
AT1G09350	GALACTINOL SYNTHASE 3 (GolS3)	Chr1	3019600	3022599	624.671
AT1G09360	Plant invertase/pectin methylesterase inhibitor superfamily protein	Chr1	3019600	3022599	624.671
AT1G09550	Pectinacetylesterase family protein	Chr1	3089600	3092799	908.674
AT1G09932	Phosphoglycerate mutase family protein	Chr1	3229600	3233399	404.501	2.48632
AT1G09935	Phosphoglycerate mutase family protein	Chr1	3233800	3236199	323.619
AT1G10220	ZCF37	Chr1	3353800	3354999	705.559
AT1G10370	EARLY-RESPONSIVE TO DEHYDRATION 9 (ERD9)	Chr1	3396600	3398399	227.894	1.45873
AT1G10380	Putative membrane lipoprotein	Chr1	3400200	3405599	548.855
AT1G10385	Vps51/Vps67 family (components of vesicular transport) protein	Chr1	3400200	3405599	548.855
AT1G10585	basic helix-loop-helix (bHLH) DNA-binding superfamily protein	Chr1	3494000	3495399	303.939	20.3172
AT1G10880	core-2/I-branching beta-1%2C6-n-acetylglucosaminyltransferase family protein	Chr1	3624200	3627399	3211.33
AT1G11080	SERINE CARBOXYPEPTIDASE-LIKE 31 (scpl31)	Chr1	3694800	3698199	1003.27
AT1G11230	transmembrane protein%2C putative (DUF761)	Chr1	3762800	3764999	1241.94
AT1G11370	Pectin lyase-like superfamily protein	Chr1	3826400	3831199	757.393
AT1G11460	nodulin MtN21 /EamA-like transporter family protein	Chr1	3856800	3862199	1216.2
AT1G11470	Pentatricopeptide repeat (PPR) superfamily protein	Chr1	3856800	3862199	1216.2
AT1G11600	"CYTOCHROME P450, FAMILY 77, SUBFAMILY B, POLYPEPTIDE 1" (CYP77B1)	Chr1	3901800	3903599	652.005	10.889
AT1G11610	"CYTOCHROME P450, FAMILY 71, SUBFAMILY A, POLYPEPTIDE 18" (CYP71A18)	Chr1	3907400	3909399	418.79
AT1G11740	ankyrin repeat family protein	Chr1	3964800	3966799	204.484
AT1G11920	Pectin lyase-like superfamily protein	Chr1	4023200	4025599	1392.01
AT1G12064	transmembrane protein	Chr1	4077400	4080199	615.101
AT1G12070	Immunoglobulin E-set superfamily protein	Chr1	4077400	4080199	615.101
AT1G12090	EXTENSIN-LIKE PROTEIN (ELP)	Chr1	4086200	4090799	332.046
AT1G12100	Bifunctional inhibitor/lipid-transfer protein/seed storage 2S albumin superfamily protein	Chr1	4092200	4096999	1442.14
AT1G12180	14.7 kDa heat shock-like protein	Chr1	4130400	4131399	266.937
AT1G12260	NAC 007 (NAC007)	Chr1	4162400	4167399	1837.75
AT1G12490	F-box associated ubiquitination effector family protein	Chr1	4260000	4262399	548.034
AT1G12560	EXPANSIN A7 (EXPA7)	Chr1	4276200	4280999	2141.86	1.36876
AT1G12570	Glucose-methanol-choline (GMC) oxidoreductase family protein	Chr1	4276200	4280999	2141.86
AT1G12630	Integrase-type DNA-binding superfamily protein	Chr1	4297600	4300799	1275.84
AT1G12980	ENHANCER OF SHOOT REGENERATION 1 (ESR1)	Chr1	4428400	4431199	609.205	9.34616
AT1G13130	Cellulase (glycosyl hydrolase family 5) protein	Chr1	4476000	4477799	489.504
AT1G13200	F-box and associated interaction domains-containing protein	Chr1	4504400	4508399	322.823
AT1G13290	DEFECTIVELY ORGANIZED TRIBUTARIES 5 (DOT5)	Chr1	4549400	4553799	1724.68
AT1G13400	NUBBIN (NUB)	Chr1	4596000	4600999	3003.02
AT1G13420	SULFOTRANSFERASE 4B (ST4B)	Chr1	4604200	4607599	867.921
AT1G13430	SULFOTRANSFERASE 4C (ST4C)	Chr1	4604200	4607599	867.921
AT1G13600	BASIC LEUCINE-ZIPPER 58 (bZIP58)	Chr1	4650600	4651599	190.653
AT1G13605	defensin-like protein	Chr1	4657400	4659599	205.427
AT1G13670	hypothetical protein	Chr1	4687600	4691399	1460.16
AT1G13680	PLC-like phosphodiesterases superfamily protein	Chr1	4687600	4691399	1460.16
AT1G13710	"CYTOCHROME P450, FAMILY 78, SUBFAMILY A, POLYPEPTIDE 5" (CYP78A5)	Chr1	4699600	4705799	2836.14
AT1G14100	FUCOSYLTRANSFERASE 8 (FUT8)	Chr1	4828200	4835599	2955.75
AT1G14110	FUCOSYLTRANSFERASE 9 (FUT9)	Chr1	4828200	4835599	2955.75
AT1G14120	2-oxoglutarate (2OG) and Fe(II)-dependent oxygenase superfamily protein	Chr1	4828200	4835599	2955.75	3.6706
AT1G14220	Ribonuclease T2 family protein	Chr1	4858600	4859599	183.746
AT1G14240	GDA1/CD39 nucleoside phosphatase family protein	Chr1	4865200	4869399	433.472	3.38029
AT1G14250	GDA1/CD39 nucleoside phosphatase family protein	Chr1	4865200	4869399	433.472
AT1G14440	HOMEOBOX PROTEIN 31 (HB31)	Chr1	4938400	4941399	1061.2
AT1G14549		Chr1	4977600	4980599	1484.06
AT1G14550	Peroxidase superfamily protein	Chr1	4977600	4980599	1484.06
AT1G14580	BLJ; BLUEJAY	Chr1	4988600	4997599	4988.27
AT1G14600	Homeodomain-like superfamily protein	Chr1	5001000	5003599	233.82	2.68723
AT1G14700	PURPLE ACID PHOSPHATASE 3 (PAP3)	Chr1	5058400	5060599	245.622
AT1G14930	Polyketide cyclase/dehydrase and lipid transport superfamily protein	Chr1	5152200	5160599	4052.81
AT1G14940	Polyketide cyclase/dehydrase and lipid transport superfamily protein	Chr1	5152200	5160599	4052.81
AT1G14950	Polyketide cyclase/dehydrase and lipid transport superfamily protein	Chr1	5152200	5160599	4052.81
AT1G14960	Polyketide cyclase/dehydrase and lipid transport superfamily protein	Chr1	5152200	5160599	4052.81
AT1G15360	SHINE 1 (SHN1)	Chr1	5282600	5286199	1673
AT1G15680	F-box family protein	Chr1	5393200	5395599	594.145
AT1G15840	hypothetical protein	Chr1	5451200	5452599	1699.58
AT1G16390	ORGANIC CATION/CARNITINE TRANSPORTER 3 (OCT3)	Chr1	5600800	5604599	1851.21
AT1G16400	"CYTOCHROME P450, FAMILY 79, SUBFAMILY F, POLYPEPTIDE 2" (CYP79F2)	Chr1	5605000	5611999	1994.45
AT1G16410	CYTOCHROME P450 79F1 (CYP79F1)	Chr1	5605000	5611999	1994.45
AT1G16910	LIGHT SENSITIVE HYPOCOTYLS 8 (LSH8)	Chr1	5785200	5785999	182.544
AT1G16930	F-box/RNI-like/FBD-like domains-containing protein	Chr1	5789800	5794599	1092.34
AT1G16940	F-box/RNI-like/FBD-like domains-containing protein	Chr1	5789800	5794599	1092.34
AT1G16950	transmembrane protein	Chr1	5795200	5797999	442.223
AT1G16980	TREHALOSE-PHOSPHATASE/SYNTHASE 2 (TPS2)	Chr1	5807200	5819399	938.477
AT1G17000	TREHALOSE-PHOSPHATASE/SYNTHASE 3 (TPS3)	Chr1	5807200	5819399	938.477
AT1G17010	2-oxoglutarate (2OG) and Fe(II)-dependent oxygenase superfamily protein	Chr1	5807200	5819399	938.477
AT1G17190	GLUTATHIONE S-TRANSFERASE TAU 26 (GSTU26)	Chr1	5875200	5876399	202.565	10.7027
AT1G17300	hypothetical protein	Chr1	5927000	5928799	419.266
AT1G17310	MADS-box transcription factor family protein	Chr1	5927000	5928799	419.266	4.49047
AT1G17345	SAUR-like auxin-responsive protein family	Chr1	5940200	5941199	291.93
AT1G17420	LIPOXYGENASE 3 (LOX3)	Chr1	5979800	5981399	308.149	3.41897
AT1G17700	PRENYLATED RAB ACCEPTOR 1.F1 (PRA1.F1)	Chr1	6089400	6091599	311.904
AT1G17710	PHOSPHOETHANOLAMINE/PHOSPHOCHOLINE PHOSPHATASE 1 (PEPC1)	Chr1	6089400	6091599	311.904
AT1G17770	SU(VAR)3-9 HOMOLOG 7 (SUVH7)	Chr1	6120800	6122599	275.209
AT1G17950	MYB DOMAIN PROTEIN 52 (MYB52)	Chr1	6174800	6179599	1629.32
AT1G18000	Major facilitator superfamily protein	Chr1	6195000	6196199	237.749
AT1G18010	Major facilitator superfamily protein	Chr1	6199800	6200999	229.476
AT1G18050	SWAP/surp RNA-binding domain protein	Chr1	6209200	6210599	184.777
AT1G18140	LACCASE 1 (LAC1)	Chr1	6240400	6242799	576.59
AT1G18191		Chr1	6262000	6263199	553.943
AT1G18230		Chr1	6270000	6273599	475.117
AT1G18350	MAP KINASE KINASE 7 (MKK7)	Chr1	6315600	6316799	210.258
AT1G18400	BR ENHANCED EXPRESSION 1 (BEE1)	Chr1	6331400	6332999	483.451
AT1G18710	MYB DOMAIN PROTEIN 47 (MYB47)	Chr1	6450400	6453199	1070.99
AT1G18760	Zinc finger%2C C3HC4 type (RING finger) family protein	Chr1	6470400	6472199	646.634
AT1G18770	RING/U-box superfamily protein	Chr1	6472800	6474199	407.233
AT1G18810	phytochrome kinase substrate-like protein	Chr1	6484800	6487199	564.412
AT1G18860	WRKY DNA-BINDING PROTEIN 61 (WRKY61)	Chr1	6509200	6511399	583.675	1.93054
AT1G19060	hypothetical protein (DUF626)	Chr1	6582000	6583599	214.192
AT1G19250	FLAVIN-DEPENDENT MONOOXYGENASE 1 (FMO1)	Chr1	6650600	6653799	1376.74	2.33076
AT1G19320	Pathogenesis-related thaumatin superfamily protein	Chr1	6679200	6680199	297.204
AT1G19640	JASMONIC ACID CARBOXYL METHYLTRANSFERASE (JMT)	Chr1	6790000	6791999	300.782
AT1G19670	CHLOROPHYLLASE 1 (CLH1)	Chr1	6803600	6805199	595.143
AT1G19790	SHI-RELATED SEQUENCE 7 (SRS7)	Chr1	6837800	6840599	955.641	7.12547
AT1G19890	MALE-GAMETE-SPECIFIC HISTONE H3 (MGH3)	Chr1	6904800	6906199	305.89
AT1G19900	glyoxal oxidase-related protein	Chr1	6906800	6909199	1499.01
AT1G20070	hypothetical protein	Chr1	6958000	6960199	1003.39	2.21487
AT1G20130	GDSL-like Lipase/Acylhydrolase superfamily protein	Chr1	6977600	6980399	1123.64
AT1G20132	GDSL-like Lipase/Acylhydrolase superfamily protein	Chr1	6980800	6985999	558.916
AT1G20135	GDSL-like Lipase/Acylhydrolase family protein	Chr1	6980800	6985999	558.916
AT1G20340	DNA-DAMAGE-REPAIR/TOLERATION PROTEIN 112 (DRT112)	Chr1	7042600	7043399	196.517	16.5443
AT1G20375	MICRORNA394A (MIR394A)	Chr1	7057600	7059599	243.273
AT1G20500	AMP-dependent synthetase and ligase family protein	Chr1	7101600	7102999	402.567
AT1G20657		Chr1	7161400	7163199	1153.33
AT1G20795	F-box family protein	Chr1	7223600	7231799	1356.1
AT1G20800	F-box/associated interaction domain protein	Chr1	7223600	7231799	1356.1
AT1G20900	ESCAROLA (ESC)	Chr1	7272800	7274599	647.535	14.0391
AT1G20990	Cysteine/Histidine-rich C1 domain family protein	Chr1	7330200	7333799	1457.67
AT1G21050	MIZU-KUSSEI-like protein (Protein of unknown function%2C DUF617)	Chr1	7366600	7369399	715.563	7.37307
AT1G21110	INDOLE GLUCOSINOLATE O-METHYLTRANSFERASE 3 (IGMT3)	Chr1	7389400	7391599	470.029	8.66303
AT1G21120	INDOLE GLUCOSINOLATE O-METHYLTRANSFERASE 2 (IGMT2)	Chr1	7395200	7396799	187.193	24.6814
AT1G21140	Vacuolar iron transporter (VIT) family protein	Chr1	7404200	7405599	1213.52	1.22361
AT1G21281		Chr1	7448600	7451999	585.906
AT1G21286		Chr1	7448800	7451999	930.957
AT1G21310	EXTENSIN 3 (EXT3)	Chr1	7452400	7454999	1147.93	228.832
AT1G21360	GLYCOLIPID TRANSFER PROTEIN 2 (GLTP2)	Chr1	7481200	7483399	480.456
AT1G21470	hypothetical protein	Chr1	7515600	7518399	1114.94
AT1G21475	hypothetical protein (DUF506)	Chr1	7522800	7525799	549.871
AT1G21490		Chr1	7526200	7528199	182.383
AT1G21525		Chr1	7537000	7537999	369.533	14.8128
AT1G21540	AMP-dependent synthetase and ligase family protein	Chr1	7549000	7553999	824.662
AT1G21550	Calcium-binding EF-hand family protein	Chr1	7549000	7553999	824.662	1.95048
AT1G21850	SKU5 SIMILAR 8 (sks8)	Chr1	7669200	7675999	870.987
AT1G21860	SKU5 SIMILAR 7 (sks7)	Chr1	7669200	7675999	870.987
AT1G21864	Plant thionin family protein	Chr1	7669200	7675999	870.987
AT1G21890	nodulin MtN21 /EamA-like transporter family protein	Chr1	7684000	7687799	708.189
AT1G21940	transmembrane protein	Chr1	7714800	7715799	217.965
AT1G21960	RING/U-box superfamily protein	Chr1	7724800	7726599	240.985
AT1G22000	LOW protein: F-box/FBD/LRR-like protein	Chr1	7746000	7753399	1919.85
AT1G22010	hypothetical protein	Chr1	7746000	7753399	1919.85
AT1G22015	(DD46)	Chr1	7746000	7753399	1919.85
AT1G22110	structural constituent of ribosome	Chr1	7801600	7802599	317.415
AT1G22330	RNA-binding (RRM/RBD/RNP motifs) family protein	Chr1	7884600	7889399	989.138
AT1G22340	UDP-GLUCOSYL TRANSFERASE 85A7 (UGT85A7)	Chr1	7890600	7894399	992.42
AT1G22350		Chr1	7890600	7894399	992.42
AT1G22370	UDP-GLUCOSYL TRANSFERASE 85A5 (UGT85A5)	Chr1	7899200	7902599	1469.62
AT1G22380	UDP-GLUCOSYL TRANSFERASE 85A3 (UGT85A3)	Chr1	7899200	7902599	1469.62
AT1G22400	(UGT85A1)	Chr1	7903800	7905199	223.073	13.3891
AT1G22550	Major facilitator superfamily protein	Chr1	7967000	7968599	186.411	3.08444
AT1G22600	Late embryogenesis abundant protein (LEA) family protein	Chr1	7988200	7989399	388.865
AT1G22680	hypothetical protein	Chr1	8025200	8026199	227.148
AT1G22900	Disease resistance-responsive (dirigent-like protein) family protein	Chr1	8103600	8108199	1468.14	1.56886
AT1G22910	RNA-binding (RRM/RBD/RNP motifs) family protein	Chr1	8103600	8108199	1468.14	2.43637
AT1G22990	HEAVY METAL ASSOCIATED ISOPRENYLATED PLANT PROTEIN 22 (HIPP22)	Chr1	8138800	8142399	785.206	5.06664
AT1G23037	F-box associated ubiquitination effector family protein	Chr1	8162000	8163799	203.918
AT1G23120	Polyketide cyclase/dehydrase and lipid transport superfamily protein	Chr1	8198800	8201199	319.775	12.7173
AT1G23130	Polyketide cyclase/dehydrase and lipid transport superfamily protein	Chr1	8198800	8201199	319.775
AT1G23160	Auxin-responsive GH3 family protein	Chr1	8208800	8211399	502.097	7.45533
AT1G23200	Plant invertase/pectin methylesterase inhibitor superfamily	Chr1	8227200	8229599	975.973
AT1G23201	GCK domain protein	Chr1	8230000	8230999	260.672
AT1G23205	Plant invertase/pectin methylesterase inhibitor superfamily protein	Chr1	8233800	8234999	664.891
AT1G23320	TRYPTOPHAN AMINOTRANSFERASE RELATED 1 (TAR1)	Chr1	8273000	8275399	706.827
AT1G23340	carboxyl-terminal proteinase%2C putative (DUF239)	Chr1	8284000	8286999	327.848
AT1G23420	INNER NO OUTER (INO)	Chr1	8317000	8320999	1570.58
AT1G23570	hypothetical protein (DUF220)	Chr1	8355000	8376199	3719.34
AT1G23580	transmembrane protein%2C putative (Domain of unknown function DUF220)	Chr1	8355000	8376199	3719.34
AT1G23590	OBP32pep protein%2C putative (Domain of unknown function DUF220)	Chr1	8355000	8376199	3719.34
AT1G23600	OBP32pep protein%2C putative (Domain of unknown function DUF220)	Chr1	8355000	8376199	3719.34
AT1G23610	hypothetical protein	Chr1	8355000	8376199	3719.34
AT1G23620		Chr1	8355000	8376199	3719.34
AT1G23640	OBP32pep protein	Chr1	8355000	8376199	3719.34
AT1G23650	hypothetical protein	Chr1	8355000	8376199	3719.34
AT1G23660	hypothetical protein (Domain of unknown function DUF220)	Chr1	8355000	8376199	3719.34
AT1G23670	OBP32pep protein%2C putative (DUF220)	Chr1	8355000	8376199	3719.34
AT1G23760	(JP630)	Chr1	8402200	8405999	275.552	7.77811
AT1G23770	F-box family protein	Chr1	8402200	8405999	275.552
AT1G24010	Polyketide cyclase/dehydrase and lipid transport superfamily protein	Chr1	8498000	8501999	1264.32
AT1G24020	MLP-LIKE PROTEIN 423 (MLP423)	Chr1	8498000	8501999	1264.32
AT1G24070	CELLULOSE SYNTHASE-LIKE A10 (CSLA10)	Chr1	8517800	8519799	219.312
AT1G24140	Matrixin family protein	Chr1	8536200	8537399	326.707	1.37635
AT1G24256	hypothetical protein	Chr1	8592000	8599999	2188.26
AT1G24260	SEPALLATA3 (SEP3)	Chr1	8592000	8599999	2188.26
AT1G24400	LYSINE HISTIDINE TRANSPORTER 2 (LHT2)	Chr1	8650800	8653399	234.978
AT1G24470	BETA-KETOACYL REDUCTASE 2 (KCR2)	Chr1	8673800	8677599	1212.24
AT1G24480	S-adenosyl-L-methionine-dependent methyltransferases superfamily protein	Chr1	8673800	8677599	1212.24
AT1G24485	ER protein carbohydrate-binding protein	Chr1	8678600	8680599	533.637
AT1G24520	HOMOLOG OF BRASSICA CAMPESTRIS POLLEN PROTEIN 1 (BCP1)	Chr1	8688600	8689399	199.572
AT1G24577	hypothetical protein	Chr1	8712200	8719199	4556.27
AT1G24590	DORNROSCHEN-LIKE (DRNL)	Chr1	8712200	8719199	4556.27
AT1G25240	ENTH/VHS/GAT family protein	Chr1	8844800	8851799	2341.53
AT1G25250	INDETERMINATE(ID)-DOMAIN 16 (IDD16)	Chr1	8844800	8851799	2341.53
AT1G25300	Octicosapeptide/Phox/Bem1p family protein	Chr1	8871400	8873199	517.951
AT1G25410	ISOPENTENYLTRANSFERASE 6 (IPT6)	Chr1	8914000	8915399	489.605
AT1G25422	hypothetical protein	Chr1	8918800	8919599	180.203
AT1G25440	B-box type zinc finger protein with CCT domain-containing protein	Chr1	8934200	8935599	581.825	1.28378
AT1G25450	3-KETOACYL-COA SYNTHASE 5 (KCS5)	Chr1	8938600	8940399	438.901	2.68812
AT1G25988	coiled-coil protein%2C putative (DUF572)	Chr1	9015600	9017399	213.409	1.14711
AT1G26250	Proline-rich extensin-like family protein	Chr1	9080200	9085399	2253.11
AT1G26310	CAULIFLOWER (CAL)	Chr1	9100000	9107199	2795.27
AT1G26320	Zinc-binding dehydrogenase family protein	Chr1	9100000	9107199	2795.27
AT1G26355	SPIRAL1-LIKE1 (SP1L1)	Chr1	9117600	9118799	265.545
AT1G26380	FAD-binding Berberine family protein	Chr1	9127000	9128399	270.54	3.48346
AT1G26390	FAD-binding Berberine family protein	Chr1	9130200	9131999	358.03	1.41458
AT1G26400	ATBBE5	Chr1	9133200	9134799	329.783
AT1G26410	ATBBE6	Chr1	9138800	9140399	415.655
AT1G26420	FAD-binding Berberine family protein	Chr1	9141600	9143199	220.996
AT1G26510	F-box associated ubiquitination effector family protein	Chr1	9160200	9162999	558.171
AT1G26515	F-box and associated interaction domains-containing protein	Chr1	9160200	9162999	558.171
AT1G26600	CLAVATA3/ESR-RELATED 9 (CLE9)	Chr1	9191400	9192599	717.525
AT1G26780	MYB DOMAIN PROTEIN 117 (MYB117)	Chr1	9268000	9272999	2109.45
AT1G26795	Plant self-incompatibility protein S1 family	Chr1	9275800	9277999	194.226
AT1G26797	Plant self-incompatibility protein S1 family	Chr1	9280800	9282799	224.343
AT1G26798	Plant self-incompatibility protein S1 family	Chr1	9280800	9282799	224.343
AT1G26820	RIBONUCLEASE 3 (RNS3)	Chr1	9291400	9295199	204.402	2.92002
AT1G26870	FEZ (FEZ)	Chr1	9310800	9313799	289.158	2.13692
AT1G26945	KIDARI (KDR)	Chr1	9349800	9352999	414.588	4.24067
AT1G27020	plant/protein	Chr1	9379400	9380799	238.341	1.94757
AT1G27030	hypothetical protein	Chr1	9381800	9384199	440.956
AT1G27040	ATNPF4.5; NPF4.5; NRT1/ PTR FAMILY 4.5	Chr1	9387000	9390799	1288.29
AT1G27461	hypothetical protein	Chr1	9537800	9539599	1037.33
AT1G27480	alpha/beta-Hydrolases superfamily protein	Chr1	9545200	9547399	389.148
AT1G27490	F-box and associated interaction domains-containing protein	Chr1	9545200	9547399	389.148
AT1G27550	F-box family protein	Chr1	9568600	9571999	860.319
AT1G27560		Chr1	9568600	9571999	860.319
AT1G27610	hypothetical protein	Chr1	9606800	9610399	586.968
AT1G27620	HXXXD-type acyl-transferase family protein	Chr1	9606800	9610399	586.968	4.08674
AT1G27660	basic helix-loop-helix (bHLH) DNA-binding superfamily protein	Chr1	9618600	9629199	3771.6
AT1G27670	transmembrane protein	Chr1	9618600	9629199	3771.6
AT1G27740	ROOT HAIR DEFECTIVE 6-LIKE 4 (RSL4)	Chr1	9652200	9655999	973.847
AT1G27860	hypothetical protein (DUF626)	Chr1	9704200	9708599	2089.04
AT1G27870	Polynucleotidyl transferase%2C ribonuclease H-like superfamily protein	Chr1	9704200	9708599	2089.04
AT1G28020	Tetratricopeptide repeat (TPR)-like superfamily protein	Chr1	9770000	9774199	244.675
AT1G28030	2-oxoglutarate (2OG) and Fe(II)-dependent oxygenase superfamily protein	Chr1	9770000	9774199	244.675
AT1G28040	RING/U-box superfamily protein	Chr1	9770000	9774199	244.675
AT1G28080	RING finger protein	Chr1	9784800	9795199	2577.13
AT1G28270	RALF-LIKE 4 (RALFL4)	Chr1	9882800	9883799	242.164
AT1G28300	LEAFY COTYLEDON 2 (LEC2)	Chr1	9896800	9917199	4956.25
AT1G28304		Chr1	9896800	9917199	4956.25
AT1G28305	Plant self-incompatibility protein S1 family	Chr1	9896800	9917199	4956.25
AT1G28306	Plant self-incompatibility protein S1 family	Chr1	9896800	9917199	4956.25
AT1G28307		Chr1	9896800	9917199	4956.25
AT1G28310	Dof-type zinc finger DNA-binding family protein	Chr1	9896800	9917199	4956.25	4.31202
AT1G28430	"CYTOCHROME P450, FAMILY 705, SUBFAMILY A, POLYPEPTIDE 24" (CYP705A24)	Chr1	9992800	9994799	200.57
AT1G28447		Chr1	10002600	10008399	596.104
AT1G28450	AGAMOUS-LIKE 58 (AGL58)	Chr1	10002600	10008399	596.104
AT1G28455		Chr1	10002600	10008399	596.104
AT1G28460	AGAMOUS-LIKE 59 (AGL59)	Chr1	10002600	10008399	596.104
AT1G28500	hypothetical protein (DUF626)	Chr1	10018600	10021199	735.493
AT1G28695	Nucleotide-diphospho-sugar transferase family protein	Chr1	10081800	10085999	1339.56
AT1G28700	Nucleotide-diphospho-sugar transferase family protein	Chr1	10081800	10085999	1339.56
AT1G29000	Heavy metal transport/detoxification superfamily protein	Chr1	10112400	10116199	500.155
AT1G29090	Cysteine proteinases superfamily protein	Chr1	10162800	10165599	821.844
AT1G29100	Heavy metal transport/detoxification superfamily protein	Chr1	10168800	10173599	1249.22	3.31247
AT1G29110	Cysteine proteinases superfamily protein	Chr1	10168800	10173599	1249.22
AT1G29670	GDSL-like Lipase/Acylhydrolase superfamily protein	Chr1	10375600	10378399	1255.09
AT1G29680	histone acetyltransferase (DUF1264)	Chr1	10375600	10378399	1255.09
AT1G29860	WRKY DNA-BINDING PROTEIN 71 (WRKY71)	Chr1	10454200	10455799	398.68	1.54695
AT1G29870	tRNA synthetase class II (G%2C H%2C P and S) family protein	Chr1	10457200	10458999	264.767
AT1G30160	hypothetical protein (DUF295)	Chr1	10606200	10609799	496.261	2.99725
AT1G30170	hypothetical protein (DUF295)	Chr1	10606200	10609799	496.261
AT1G30250	hypothetical protein	Chr1	10647000	10649199	264.26
AT1G30350	Pectin lyase-like superfamily protein	Chr1	10710000	10711999	912.149
AT1G30650	WRKY DNA-BINDING PROTEIN 14 (WRKY14)	Chr1	10868200	10873199	2094.42	3.27474
AT1G30700	FAD-binding Berberine family protein	Chr1	10892400	10893599	621.818	41.9317
AT1G30710	ATBBE9	Chr1	10895000	10896799	220.919
AT1G30720	FAD-binding Berberine family protein	Chr1	10898000	10899599	331.004	22.4422
AT1G30730	ATBBE11	Chr1	10900800	10902199	377.763	19.5148
AT1G30780	F-box associated ubiquitination effector family protein	Chr1	10925000	10930999	1405.68
AT1G30784		Chr1	10925000	10930999	1405.68
AT1G30790	F-box and associated interaction domains-containing protein	Chr1	10931600	10936799	1070.09
AT1G30795	Glycine-rich protein family	Chr1	10931600	10936799	1070.09
AT1G30800	Fasciclin-like arabinogalactan family protein	Chr1	10931800	10937199	313.32
AT1G30840	PURINE PERMEASE 4 (PUP4)	Chr1	10973800	10975799	1168.94
AT1G30920	F-box family protein	Chr1	11003000	11009999	1019.56
AT1G30921		Chr1	11003000	11009999	1019.56
AT1G30930	F-box family protein	Chr1	11013400	11015999	629.351
AT1G30940		Chr1	11020200	11023599	809.356
AT1G30945		Chr1	11024200	11028599	435.716
AT1G30950	UNUSUAL FLORAL ORGANS (UFO)	Chr1	11029200	11037199	1398.74
AT1G30990	Polyketide cyclase/dehydrase and lipid transport superfamily protein	Chr1	11051800	11054599	352.272
AT1G31000	F-box/associated interaction domain protein	Chr1	11051800	11054599	352.272
AT1G31040	PLATZ transcription factor family protein	Chr1	11070200	11073399	922.341
AT1G31050	basic helix-loop-helix (bHLH) DNA-binding superfamily protein	Chr1	11075400	11084599	2605.44
AT1G31090	F-box family protein	Chr1	11094200	11097599	272.065
AT1G31093		Chr1	11094200	11097599	272.065
AT1G31163	F-box associated ubiquitination effector family protein	Chr1	11127800	11133199	803.551
AT1G31245		Chr1	11165400	11167399	277.86
AT1G31250	proline-rich family protein	Chr1	11165400	11167399	277.86
AT1G31310	hydroxyproline-rich glycoprotein family protein	Chr1	11197400	11204599	2217.05
AT1G31510	F-box associated ubiquitination effector family protein	Chr1	11277200	11280399	498.372
AT1G31520	hypothetical protein	Chr1	11277200	11280399	498.372
AT1G31530	DNAse I-like superfamily protein	Chr1	11281000	11283399	560.119
AT1G31620	hypothetical protein	Chr1	11316600	11319799	1124.24
AT1G31630	AGAMOUS-LIKE 86 (AGL86)	Chr1	11316600	11319799	1124.24
AT1G31670	Copper amine oxidase family protein	Chr1	11336200	11348399	3104.48
AT1G31690	Copper amine oxidase family protein	Chr1	11336200	11348399	3104.48
AT1G31710	Copper amine oxidase family protein	Chr1	11349600	11351799	670.744
AT1G31720	chitin synthase%2C putative (DUF1218)	Chr1	11354600	11358999	559.735
AT1G31983		Chr1	11497200	11504599	858.304
AT1G31990	transmembrane protein	Chr1	11487800	11489399	316.64
AT1G32020	F-box family protein	Chr1	11511800	11519399	1009.47
AT1G32030	plant-specific B3-DNA-binding domain protein (DUF313)	Chr1	11511800	11519399	1009.47
AT1G32049		Chr1	11527400	11528399	768.981
AT1G32140	F-box family protein	Chr1	11562600	11565399	682.584
AT1G32172		Chr1	11579400	11582399	238.321
AT1G32240	KANADI 2 (KAN2)	Chr1	11625600	11630799	2546.54
AT1G32420	F-box and associated interaction domains-containing protein	Chr1	11701600	11706799	1483.08
AT1G32430	F-box and associated interaction domains-containing protein	Chr1	11701600	11706799	1483.08
AT1G32660	F-box and associated interaction domains-containing protein	Chr1	11810800	11813199	366.386
AT1G32770	NAC DOMAIN CONTAINING PROTEIN 12 (NAC012)	Chr1	11865200	11867599	895.869
AT1G32780	GroES-like zinc-binding dehydrogenase family protein	Chr1	11868600	11872599	700.74
AT1G32975	hypothetical protein	Chr1	11952800	11955199	185.064
AT1G32980	Subtilisin-like serine endopeptidase family protein	Chr1	11952800	11955199	185.064
AT1G33080	MATE efflux family protein	Chr1	11986600	11990599	471.178
AT1G33090	MATE efflux family protein	Chr1	11992000	11996799	1115.96
AT1G33100	MATE efflux family protein	Chr1	11997400	12000799	550.009
AT1G33240	GT-2-LIKE 1 (GTL1)	Chr1	12052200	12054599	300.163	4.3341
AT1G33530	F-box family protein	Chr1	12159400	12167199	1568.47
AT1G33540	SERINE CARBOXYPEPTIDASE-LIKE 18 (scpl18)	Chr1	12159400	12167199	1568.47
AT1G33670	Leucine-rich repeat (LRR) family protein	Chr1	12201800	12203399	341.715
AT1G33709		Chr1	12219200	12238799	4640.91
AT1G33710	RNA-directed DNA polymerase (reverse transcriptase)-related family protein	Chr1	12219200	12238799	4640.91
AT1G33720	"CYTOCHROME P450, FAMILY 76, SUBFAMILY C, POLYPEPTIDE 6" (CYP76C6)	Chr1	12219200	12238799	4640.91
AT1G33730	"CYTOCHROME P450, FAMILY 76, SUBFAMILY C, POLYPEPTIDE 5" (CYP76C5)	Chr1	12219200	12238799	4640.91	2.02522
AT1G33740		Chr1	12219200	12238799	4640.91
AT1G33743		Chr1	12219200	12238799	4640.91
AT1G33750	TERPENE SYNTHASE 22; TPS22	Chr1	12219200	12238799	4640.91
AT1G33760	ERF022; ETHYLENE RESPONSE FACTOR022	Chr1	12219200	12238799	4640.91	2.08094
AT1G33811	GDSL-like Lipase/Acylhydrolase superfamily protein	Chr1	12268400	12272199	417.526
AT1G33820	hypothetical protein	Chr1	12274800	12288599	1371.37
AT1G33830	P-loop containing nucleoside triphosphate hydrolases superfamily protein	Chr1	12274800	12288599	1371.37
AT1G33840	LURP-one-like protein (DUF567)	Chr1	12274800	12288599	1371.37
AT1G33850	Ribosomal protein S19 family protein	Chr1	12274800	12288599	1371.37
AT1G33860	hypothetical protein	Chr1	12293600	12295599	382.966
AT1G33870	P-loop containing nucleoside triphosphate hydrolases superfamily protein	Chr1	12300800	12305999	704.734
AT1G33880	Avirulence induced gene (AIG1) family protein	Chr1	12300800	12305999	704.734
AT1G33890	Avirulence induced gene (AIG1) family protein	Chr1	12307600	12309999	616.705
AT1G33900	P-loop containing nucleoside triphosphate hydrolases superfamily protein	Chr1	12310800	12324999	1004.22
AT1G33910	P-loop containing nucleoside triphosphate hydrolases superfamily protein	Chr1	12310800	12324999	1004.22
AT1G33920	PHLOEM PROTEIN 2-A4 (PP2-A4)	Chr1	12310800	12324999	1004.22
AT1G33925		Chr1	12310800	12324999	1004.22
AT1G33930	P-loop containing nucleoside triphosphate hydrolases superfamily protein	Chr1	12310800	12324999	1004.22
AT1G34047	Defensin-like (DEFL) family protein	Chr1	12389400	12391599	242.656
AT1G34050	Ankyrin repeat family protein	Chr1	12393400	12395999	241.92
AT1G34330		Chr1	12527200	12529399	263.548
AT1G34440	transmembrane protein	Chr1	12592000	12600799	1405.92
AT1G34460	CYCLIN B1;5 (CYCB1;5)	Chr1	12592000	12600799	1405.92
AT1G34520	MBOAT (membrane bound O-acyl transferase) family protein	Chr1	12621600	12624599	338.881
AT1G34575	ATBBE14	Chr1	12657400	12658599	362.67
AT1G34580	Major facilitator superfamily protein	Chr1	12660400	12663599	925.199
AT1G34670	MYB DOMAIN PROTEIN 93 (MYB93)	Chr1	12705200	12712199	1260.7
AT1G34680		Chr1	12705200	12712199	1260.7
AT1G34790	TRANSPARENT TESTA 1 (TT1)	Chr1	12763200	12765799	1326.2
AT1G34792	Plant thionin family protein	Chr1	12763400	12768799	795.407
AT1G35183	zinc finger%2C C3HC4 type (RING finger) protein	Chr1	12883200	12887799	268.101
AT1G35230	ARABINOGALACTAN PROTEIN 5 (AGP5)	Chr1	12917000	12917799	306.067	8.26074
AT1G35250	ACYL-LIPID THIOESTERASE 2; ALT2	Chr1	12932400	12937999	1155.22
AT1G35255	transmembrane protein	Chr1	12932400	12937999	1155.22
AT1G35260	MLP-LIKE PROTEIN 165 (MLP165)	Chr1	12932400	12937999	1155.22
AT1G35290	Thioesterase superfamily protein	Chr1	12947800	12950399	280.982
AT1G35310	MLP-LIKE PROTEIN 168 (MLP168)	Chr1	12953600	12958399	315.727
AT1G35330	RING/U-box superfamily protein	Chr1	12965000	12967999	712.604
AT1G35365	hypothetical protein (DUF1184)	Chr1	12989800	12994999	349.287
AT1G35440	CYCLIN T1;1 (CYCT1;1)	Chr1	13033600	13038799	1223.9
AT1G35450		Chr1	13033600	13038799	1223.9
AT1G35540	AUXIN RESPONSE FACTOR 14 (ARF14)	Chr1	13110600	13114999	813.433
AT1G35545		Chr1	13110600	13114999	813.433
AT1G35550	elongation factor Tu C-terminal domain-containing protein	Chr1	13110600	13114999	813.433
AT1G35830	VQ motif-containing protein	Chr1	13320000	13322199	534.874	3.88928
AT1G36150	Bifunctional inhibitor/lipid-transfer protein/seed storage 2S albumin superfamily protein	Chr1	13528000	13529799	289.357
AT1G37140	MEI2 C-TERMINAL RRM ONLY LIKE 1 (MCT1)	Chr1	14170000	14172999	1431.76
AT1G40104	hypothetical protein	Chr1	15081800	15086199	16868.2
AT1G40390	DNAse I-like superfamily protein	Chr1	15429000	15432999	222.43
AT1G42560	MILDEW RESISTANCE LOCUS O 9 (MLO9)	Chr1	15980800	15984199	230.858
AT1G43005	F-box/associated interaction domain protein	Chr1	16149800	16157799	875.463
AT1G43010	Pentatricopeptide repeat (PPR) superfamily protein	Chr1	16149800	16157799	875.463
AT1G43020	electron protein%2C putative (Protein of unknown function%2C DUF547)	Chr1	16149800	16157799	875.463
AT1G43140	Cullin family protein	Chr1	16231400	16235999	1311.01
AT1G43624		Chr1	16431000	16434199	369.29
AT1G43630	plant/protein (DUF793)	Chr1	16436600	16441399	256.12
AT1G43640	TUBBY LIKE PROTEIN 5 (TLP5)	Chr1	16439400	16441199	186.777
AT1G43680	nucleic acid-binding/zinc ion-binding protein	Chr1	16472200	16473399	578.88
AT1G44080	F-box SKIP23-like protein (DUF295)	Chr1	16754000	16756199	440.605
AT1G44090	GIBBERELLIN 20-OXIDASE 5 (GA20OX5)	Chr1	16760200	16762599	595.693
AT1G44191	ECA1 gametogenesis related family protein	Chr1	16811200	16818999	4557.6
AT1G44224	ECA1 gametogenesis related family protein	Chr1	16820400	16822399	928.601
AT1G44286		Chr1	16822800	16823999	198.784
AT1G44318	(hemb2)	Chr1	16828600	16834199	1698.06
AT1G44800	SILIQUES ARE RED 1 (SIAR1)	Chr1	16916200	16919199	477.352	1.65348
AT1G45100	RNA-binding (RRM/RBD/RNP motifs) family protein	Chr1	17049400	17052399	1073.89
AT1G45201	TRIACYLGLYCEROL LIPASE-LIKE 1 (TLL1)	Chr1	17121400	17129199	2003.87
AT1G46336	transmembrane protein	Chr1	17230400	17232999	283.734
AT1G46408	AGAMOUS-LIKE 97 (AGL97)	Chr1	17230400	17232999	283.734
AT1G46480	WUSCHEL RELATED HOMEOBOX 4 (WOX4)	Chr1	17236400	17238399	510.735	9.47756
AT1G46840	F-box family protein	Chr1	17269200	17271999	298.588
AT1G47300	F-box family protein	Chr1	17340000	17342399	249.262
AT1G47317	defensin-like protein	Chr1	17346600	17350399	650.788
AT1G47350	F-box associated ubiquitination effector family protein	Chr1	17357200	17361199	825.66
AT1G47370	ESPONSE TO THE BACTERIAL TYPE III EFFECTOR PROTEIN HOPBA1; RBA1	Chr1	17365400	17371799	1833.93
AT1G47389	transmembrane protein	Chr1	17378000	17380599	1369.97
AT1G47390	F-box and associated interaction domains-containing protein	Chr1	17378000	17380599	1369.97
AT1G47395	hypothetical protein	Chr1	17381800	17393599	2437.61
AT1G47400	hypothetical protein	Chr1	17381800	17393599	2437.61
AT1G47440		Chr1	17401200	17403399	194.664
AT1G47450	prolamin-like protein (DUF784)	Chr1	17401200	17403399	194.664
AT1G47600	BETA GLUCOSIDASE 34 (BGLU34)	Chr1	17490600	17497999	1662.11
AT1G47603	PURINE PERMEASE 19 (PUP19)	Chr1	17490600	17497999	1662.11
AT1G47610	Transducin/WD40 repeat-like superfamily protein	Chr1	17503000	17509199	1884.91
AT1G47620	"CYTOCHROME P450, FAMILY 96, SUBFAMILY A, POLYPEPTIDE 8" (CYP96A8)	Chr1	17503000	17509199	1884.91
AT1G47705		Chr1	17550000	17551199	185.516
AT1G47730	F-box and associated interaction domains-containing protein	Chr1	17563600	17566199	1134.62
AT1G47770	Beta-galactosidase related protein	Chr1	17589800	17602999	1753.45
AT1G47780	alpha/beta-Hydrolases superfamily protein	Chr1	17589800	17602999	1753.45
AT1G47786	alpha/beta-Hydrolases superfamily protein	Chr1	17589800	17602999	1753.45
AT1G47790	F-box and associated interaction domains-containing protein	Chr1	17589800	17602999	1753.45
AT1G47800	F-box and associated interaction domains-containing protein	Chr1	17589800	17602999	1753.45
AT1G47810	F-box and associated interaction domains-containing protein	Chr1	17603400	17606199	625.034
AT1G47980	desiccation-like protein	Chr1	17690400	17694199	732.715	1.13152
AT1G48130	1-CYSTEINE PEROXIREDOXIN 1 (PER1)	Chr1	17780200	17781799	1042.61
AT1G48590	C2-DOMAIN ABA-RELATED 5; CAR5	Chr1	17962400	17965199	362.67
AT1G48690	Auxin-responsive GH3 family protein	Chr1	18008800	18012799	287.795
AT1G48698		Chr1	18008800	18012799	287.795
AT1G48700	2-oxoglutarate (2OG) and Fe(II)-dependent oxygenase superfamily protein	Chr1	18008800	18012799	287.795
AT1G48730	hypothetical protein	Chr1	18019800	18023199	434.633
AT1G48742	MICRORNA157D (MIR157D)	Chr1	18026200	18028399	389.282
AT1G48800	Terpenoid cyclases/Protein prenyltransferases superfamily protein	Chr1	18048200	18054599	933.84
AT1G48910	YUCCA 10 (YUC10)	Chr1	18091200	18093999	935.06
AT1G48980	2-oxoglutarate (2OG) and Fe(II)-dependent oxygenase superfamily protein	Chr1	18119000	18122399	1087.04
AT1G48990	Oleosin family protein	Chr1	18119000	18122399	1087.04
AT1G49030	PLAC8 family protein	Chr1	18136400	18137399	194.762
AT1G49100	Leucine-rich repeat protein kinase family protein	Chr1	18166000	18173999	1314
AT1G49110	hypothetical protein	Chr1	18166000	18173999	1314
AT1G49120	CYTOKININ RESPONSE FACTOR 9 (CRF9)	Chr1	18166000	18173999	1314
AT1G49190	RESPONSE REGULATOR 19 (RR19)	Chr1	18188200	18194799	1932.53
AT1G49250	ATP-dependent DNA ligase	Chr1	18220600	18233999	2418.01
AT1G49260	mechanosensitive ion channel-like protein	Chr1	18220600	18233999	2418.01
AT1G49270	PROLINE-RICH EXTENSIN-LIKE RECEPTOR KINASE 7 (PERK7)	Chr1	18220600	18233999	2418.01
AT1G49280		Chr1	18220600	18233999	2418.01
AT1G49290	Rho guanine nucleotide exchange factor	Chr1	18220600	18233999	2418.01
AT1G49310	transmembrane protein	Chr1	18237600	18240399	397.401
AT1G49320	UNKNOWN SEED PROTEIN LIKE 1 (USPL1)	Chr1	18246600	18248599	295.679
AT1G49330	hydroxyproline-rich glycoprotein family protein	Chr1	18249600	18251399	1636.81
AT1G49450	Transducin/WD40 repeat-like superfamily protein	Chr1	18305400	18306999	766.939
AT1G49470	transmembrane epididymal protein (DUF716)	Chr1	18310400	18311599	246.826
AT1G49570	Peroxidase superfamily protein	Chr1	18345800	18350599	1057.18
AT1G50050	CAP (Cysteine-rich secretory proteins%2C Antigen 5%2C and Pathogenesis-related 1 protein) superfamily protein	Chr1	18545800	18547599	530.467
AT1G50130		Chr1	18566400	18567799	352.721
AT1G50310	SUGAR TRANSPORTER 9 (STP9)	Chr1	18634000	18636599	244.979
AT1G50650	Stigma-specific Stig1 family protein	Chr1	18763000	18764599	341.773
AT1G50680	AP2/B3 transcription factor family protein	Chr1	18777800	18780999	216.766
AT1G50690	Cystatin/monellin superfamily protein	Chr1	18779200	18781199	449.017
AT1G50691		Chr1	18779200	18781199	449.017
AT1G50720	Stigma-specific Stig1 family protein	Chr1	18788800	18790199	294.64
AT1G50870	F-box and associated interaction domains-containing protein	Chr1	18854800	18861999	1111.18
AT1G50880	F-box and associated interaction domains-containing protein	Chr1	18854800	18861999	1111.18
AT1G50960	GIBBERELLIN 2-OXIDASE 7 (GA2OX7)	Chr1	18887000	18895199	1373.71
AT1G50980	F-box/RNI-like/FBD-like domains-containing protein	Chr1	18901400	18905399	545.036
AT1G50990	kinase with tetratricopeptide repeat domain-containing protein	Chr1	18901400	18905399	545.036
AT1G51000	hypothetical protein	Chr1	18909400	18921199	1954.09	30.1785
AT1G51010	hypothetical protein	Chr1	18909400	18921199	1954.09	43.3933
AT1G51020	hypothetical protein	Chr1	18909400	18921199	1954.09	36.9185
AT1G51030	hypothetical protein	Chr1	18909400	18921199	1954.09	8.54233
AT1G51035	hypothetical protein	Chr1	18909400	18921199	1954.09	12.8258
AT1G51040	Protein kinase superfamily protein	Chr1	18909400	18921199	1954.09
AT1G51210	UDP-Glycosyltransferase superfamily protein	Chr1	18988600	18995799	1264.24
AT1G51220	WIP DOMAIN PROTEIN 5 (WIP5)	Chr1	18988600	18995799	1264.24
AT1G51230	Plant self-incompatibility protein S1 family	Chr1	18996200	18997599	181.824
AT1G51270	vesicle-associated protein 1-4	Chr1	19006000	19013999	1588.12
AT1G51290	F-box and associated interaction domains-containing protein	Chr1	19006000	19013999	1588.12
AT1G51300	alpha/beta-Hydrolases superfamily protein	Chr1	19014400	19017999	1276.23
AT1G51355	cyclin-dependent kinase inhibitor SMR3-like protein	Chr1	19041200	19043199	319.171
AT1G51470	BETA GLUCOSIDASE 35 (BGLU35)	Chr1	19087000	19097399	2301.68
AT1G51480	RESISTANCE SILENCED GENE 1; RSG1	Chr1	19087000	19097399	2301.68
AT1G51490	BETA GLUCOSIDASE 36 (BGLU36)	Chr1	19087000	19097399	2301.68
AT1G51805	Leucine-rich repeat protein kinase family protein	Chr1	19220800	19225399	292.03
AT1G51810	Leucine-rich repeat protein kinase family protein	Chr1	19226800	19230799	183.443
AT1G51820	Leucine-rich repeat protein kinase family protein	Chr1	19237200	19240399	196.81
AT1G51830	Leucine-rich repeat protein kinase family protein	Chr1	19243000	19246199	239.759
AT1G51870	protein kinase family protein	Chr1	19263200	19267599	596.658
AT1G51880	ROOT HAIR SPECIFIC 6 (RHS6)	Chr1	19268000	19274399	546.273
AT1G51900	IST1-LIKE 12; ISTL12	Chr1	19279400	19283399	688.933
AT1G51910	Leucine-rich repeat protein kinase family protein	Chr1	19283800	19288399	428.441
AT1G51913	transmembrane protein	Chr1	19292800	19295399	259.625
AT1G51915	cryptdin protein-like protein	Chr1	19292800	19295399	259.625
AT1G51920	transmembrane protein	Chr1	19292800	19295399	259.625
AT1G51930	RING/U-box superfamily protein	Chr1	19292800	19295399	259.625
AT1G52000	Mannose-binding lectin superfamily protein	Chr1	19333600	19335999	246.382
AT1G52040	MYROSINASE-BINDING PROTEIN 1 (MBP1)	Chr1	19350200	19368799	3956.17
AT1G52050	Mannose-binding lectin superfamily protein	Chr1	19350200	19368799	3956.17
AT1G52060	Mannose-binding lectin superfamily protein	Chr1	19350200	19368799	3956.17
AT1G52070	Mannose-binding lectin superfamily protein	Chr1	19350200	19368799	3956.17
AT1G52100	Mannose-binding lectin superfamily protein	Chr1	19382400	19385399	374.185	5.02168
AT1G52110	Mannose-binding lectin superfamily protein	Chr1	19386400	19389799	448.189	1.04657
AT1G52120	Mannose-binding lectin superfamily protein	Chr1	19395400	19399199	911.697	6.34137
AT1G52130	Mannose-binding lectin superfamily protein	Chr1	19400600	19402799	197.176	60.6318
AT1G52140	Avr9/Cf-9 rapidly elicited protein	Chr1	19404800	19408799	1225.9	17.6075
AT1G52190	ATNPF1.2; NITRATE TRANSPORTER 1.11; NPF1.2; NRT1.11; NRT1/ PTR FAMILY 1.2	Chr1	19436200	19438799	281.486
AT1G52211		Chr1	19444400	19451799	711.3
AT1G52400	BETA GLUCOSIDASE 18 (BGLU18)	Chr1	19514400	19517999	588.996
AT1G52460	alpha/beta-Hydrolases superfamily protein	Chr1	19547800	19559599	2365.09
AT1G52470	alpha/beta-Hydrolases superfamily protein	Chr1	19547800	19559599	2365.09
AT1G52490	F-box/associated interaction domain protein	Chr1	19547800	19559599	2365.09
AT1G52680	late embryogenesis abundant protein-related / LEA protein-like protein	Chr1	19618200	19624199	1675.03
AT1G52690	LATE EMBRYOGENESIS ABUNDANT 7 (LEA7)	Chr1	19618200	19624199	1675.03
AT1G52695	alpha/beta-Hydrolases superfamily protein	Chr1	19618200	19624199	1675.03
AT1G52696		Chr1	19624600	19632399	2163.27
AT1G52700	alpha/beta-Hydrolases superfamily protein	Chr1	19624600	19632399	2163.27
AT1G52800	2-oxoglutarate (2OG) and Fe(II)-dependent oxygenase superfamily protein	Chr1	19664000	19666399	275.48
AT1G52827	CADMIUM TOLERANCE 1 (CDT1)	Chr1	19671600	19674799	325.959	11.3148
AT1G52830	INDOLE-3-ACETIC ACID 6 (IAA6)	Chr1	19671600	19674799	325.959
AT1G52900	Toll-Interleukin-Resistance (TIR) domain family protein	Chr1	19702200	19703199	293.755
AT1G53020	UBIQUITIN-CONJUGATING ENZYME 26 (UBC26)	Chr1	19749400	19756599	903.692
AT1G53023	Ubiquitin-conjugating enzyme family protein	Chr1	19749400	19756599	903.692
AT1G53080	Legume lectin family protein	Chr1	19781200	19782399	417.559
AT1G53163	membrane-associated kinase regulator	Chr1	19812200	19813399	633.761
AT1G53260	hypothetical protein	Chr1	19859200	19860999	258.307
AT1G53325	F-box associated ubiquitination effector family protein	Chr1	19894000	19895799	387.726
AT1G53360	F-box/associated interaction domain protein	Chr1	19907400	19912399	2624.69
AT1G53366	hypothetical protein	Chr1	19907400	19912399	2624.69
AT1G53370	F-box and associated interaction domains-containing protein	Chr1	19907400	19912399	2624.69
AT1G53610	transmembrane protein	Chr1	20007600	20009799	325.53
AT1G53683	MICRORNA169D (MIR169D)	Chr1	20039400	20043599	1407.25
AT1G53687	MICRORNA169E (MIR169E)	Chr1	20039400	20043599	1407.25
AT1G53690	DNA directed RNA polymerase%2C 7 kDa subunit	Chr1	20039400	20043599	1407.25
AT1G53700	WAG 1 (WAG1)	Chr1	20048400	20049999	1097.47
AT1G53830	PECTIN METHYLESTERASE 2 (PME2)	Chr1	20098400	20100599	1317.2	3.37049
AT1G54035		Chr1	20170400	20172399	1239.24
AT1G54040	EPITHIOSPECIFIER PROTEIN (ESP)	Chr1	20170400	20172399	1239.24
AT1G54330	NAC DOMAIN CONTAINING PROTEIN 20 (NAC020)	Chr1	20279200	20282999	1222.42
AT1G54470	RESISTANCE TO PERONOSPORA PARASITICA 27 (RPP27)	Chr1	20344600	20348799	342.456
AT1G54550	F-box and associated interaction domains-containing protein	Chr1	20369200	20373599	350.442
AT1G54560	(XIE)	Chr1	20369200	20373599	350.442
AT1G54740	FANTASTIC four-like protein (DUF3049)	Chr1	20430000	20431799	854.252
AT1G54860	Glycoprotein membrane precursor GPI-anchored	Chr1	20457200	20461599	1215.09
AT1G54870	NAD(P)-binding Rossmann-fold superfamily protein	Chr1	20457200	20461599	1215.09
AT1G54880		Chr1	20457200	20461599	1215.09
AT1G54890	Late embryogenesis abundant (LEA) protein-like protein	Chr1	20463000	20465799	1487.23	4.79203
AT1G54930	GRF zinc finger / Zinc knuckle protein	Chr1	20477400	20485199	1840.29
AT1G54940	PLANT GLYCOGENIN-LIKE STARCH INITIATION PROTEIN 4 (PGSIP4)	Chr1	20477400	20485199	1840.29
AT1G54970	PROLINE-RICH PROTEIN 1 (PRP1)	Chr1	20504800	20508399	1110.17	1.23414
AT1G54980	Plant invertase/pectin methylesterase inhibitor superfamily protein	Chr1	20504800	20508399	1110.17
AT1G55030	RNI-like superfamily protein	Chr1	20530800	20534399	460.821
AT1G55035		Chr1	20530800	20534399	460.821
AT1G55110	INDETERMINATE(ID)-DOMAIN 7 (IDD7)	Chr1	20560200	20563399	912.62	3.81323
AT1G55220	hypothetical protein	Chr1	20600800	20603599	598.572
AT1G55221		Chr1	20600800	20603599	598.572
AT1G55230	proteinase inhibitor I4%2C serpin (DUF716)	Chr1	20600800	20603599	598.572
AT1G55260	GLYCOSYLPHOSPHATIDYLINOSITOL-ANCHORED LIPID PROTEIN TRANSFER 6; LTPG6	Chr1	20614400	20615399	184.119	1.24919
AT1G55410		Chr1	20688600	20694199	857.732
AT1G55420	EMBRYO SAC DEVELOPMENT ARREST 11 (EDA11)	Chr1	20688600	20694199	857.732	3.33898
AT1G55430	Cysteine/Histidine-rich C1 domain family protein	Chr1	20697600	20699799	336.969	5.28934
AT1G55440	Cysteine/Histidine-rich C1 domain family protein	Chr1	20701600	20703799	684.859
AT1G55570	SKU5 SIMILAR 12 (sks12)	Chr1	20757800	20759999	651.801
AT1G55580	LATERAL SUPPRESSOR (LAS)	Chr1	20764200	20768599	358.725	7.92002
AT1G55650	HMGB11	Chr1	20794800	20798599	628.213
AT1G55660	FBD%2C F-box and Leucine Rich Repeat domains containing protein	Chr1	20799400	20802399	216.821
AT1G55700	Cysteine/Histidine-rich C1 domain family protein	Chr1	20821600	20823599	700.834
AT1G55720	CATION EXCHANGER 6 (CAX6)	Chr1	20826800	20830599	413.183
AT1G56030	RING/U-box protein	Chr1	20957600	20960799	276.586
AT1G56040	HEAT/U-box protein	Chr1	20957600	20960799	276.586
AT1G56270	RPB1a	Chr1	21069800	21072199	913.085
AT1G56360	PURPLE ACID PHOSPHATASE 6 (PAP6)	Chr1	21098600	21102799	605.48
AT1G56380	Mitochondrial transcription termination factor family protein	Chr1	21098600	21102799	605.48
AT1G56385	Plant self-incompatibility protein S1 family	Chr1	21106200	21116199	1158.38
AT1G56390		Chr1	21106200	21116199	1158.38
AT1G56400	F-box family protein	Chr1	21106200	21116199	1158.38
AT1G56430	NICOTIANAMINE SYNTHASE 4 (NAS4)	Chr1	21137000	21137999	180.12	1.0062
AT1G56520	Disease resistance protein (TIR-NBS-LRR class) family	Chr1	21173200	21176399	286.533
AT1G56530	hydroxyproline-rich glycoprotein family protein	Chr1	21179200	21185199	1013.92
AT1G56540	Disease resistance protein (TIR-NBS-LRR class) family	Chr1	21179200	21185199	1013.92
AT1G56550	RHAMNOGALACTURONAN SPECI&#64257;C XYLOSYLTRANSFERASE 3 (RGXT3)	Chr1	21186400	21191599	651.832
AT1G56553	defensin-like protein	Chr1	21186400	21191599	651.832
AT1G56555	transmembrane protein	Chr1	21186400	21191599	651.832
AT1G56600	GALACTINOL SYNTHASE 2 (GolS2)	Chr1	21207400	21209399	286.439	1.32739
AT1G56620	Plant invertase/pectin methylesterase inhibitor superfamily protein	Chr1	21218600	21221999	193.375
AT1G56630	alpha/beta-Hydrolases superfamily protein	Chr1	21225400	21235999	1197.95
AT1G56640		Chr1	21225400	21235999	1197.95
AT1G56650	PRODUCTION OF ANTHOCYANIN PIGMENT 1 (PAP1)	Chr1	21225400	21235999	1197.95
AT1G56750		Chr1	21267800	21274999	290.521
AT1G56760		Chr1	21267800	21274999	290.521
AT1G56770		Chr1	21267800	21274999	290.521
AT1G56780		Chr1	21267800	21274999	290.521
AT1G56790		Chr1	21267800	21274999	290.521
AT1G56800		Chr1	21267800	21274999	290.521
AT1G56810		Chr1	21267800	21274999	290.521
AT1G56820		Chr1	21267800	21274999	290.521
AT1G56830		Chr1	21267800	21274999	290.521
AT1G56840		Chr1	21267800	21274999	290.521
AT1G56850		Chr1	21267800	21274999	290.521
AT1G56940		Chr1	21279000	21290399	442.266
AT1G56950		Chr1	21279000	21290399	442.266
AT1G56960		Chr1	21279000	21290399	442.266
AT1G56970		Chr1	21279000	21290399	442.266
AT1G56980		Chr1	21279000	21290399	442.266
AT1G56990		Chr1	21279000	21290399	442.266
AT1G57000		Chr1	21279000	21290399	442.266
AT1G57010		Chr1	21279000	21290399	442.266
AT1G57020		Chr1	21279000	21290399	442.266
AT1G57030		Chr1	21279000	21290399	442.266
AT1G57040		Chr1	21279000	21290399	442.266
AT1G57050		Chr1	21279000	21290399	442.266
AT1G57060		Chr1	21279000	21290399	442.266
AT1G57070		Chr1	21279000	21290399	442.266
AT1G57080		Chr1	21279000	21290399	442.266
AT1G57090		Chr1	21279000	21290399	442.266
AT1G57100		Chr1	21279000	21290399	442.266
AT1G57110		Chr1	21279000	21290399	442.266
AT1G57120		Chr1	21279000	21290399	442.266
AT1G57130		Chr1	21279000	21290399	442.266
AT1G57140		Chr1	21279000	21290399	442.266
AT1G57150		Chr1	21279000	21290399	442.266
AT1G57170		Chr1	21290800	21301799	375.111
AT1G57180		Chr1	21290800	21301799	375.111
AT1G57190		Chr1	21290800	21301799	375.111
AT1G57200		Chr1	21290800	21301799	375.111
AT1G57210		Chr1	21290800	21301799	375.111
AT1G57220		Chr1	21290800	21301799	375.111
AT1G57230		Chr1	21290800	21301799	375.111
AT1G57240		Chr1	21290800	21301799	375.111
AT1G57250		Chr1	21290800	21301799	375.111
AT1G57260		Chr1	21290800	21301799	375.111
AT1G57270		Chr1	21290800	21301799	375.111
AT1G57280		Chr1	21290800	21301799	375.111
AT1G57290		Chr1	21290800	21301799	375.111
AT1G57300		Chr1	21290800	21301799	375.111
AT1G57310		Chr1	21290800	21301799	375.111
AT1G57320		Chr1	21290800	21301799	375.111
AT1G57330		Chr1	21290800	21301799	375.111
AT1G57340		Chr1	21290800	21301799	375.111
AT1G57350		Chr1	21290800	21301799	375.111
AT1G57360		Chr1	21290800	21301799	375.111
AT1G57370		Chr1	21290800	21301799	375.111
AT1G57380		Chr1	21290800	21301799	375.111
AT1G57390		Chr1	21290800	21301799	375.111
AT1G57410		Chr1	21302200	21308799	279.607
AT1G57420		Chr1	21302200	21308799	279.607
AT1G57430		Chr1	21302200	21308799	279.607
AT1G57440		Chr1	21302200	21308799	279.607
AT1G57450		Chr1	21302200	21308799	279.607
AT1G57460		Chr1	21302200	21308799	279.607
AT1G57470		Chr1	21302200	21308799	279.607
AT1G57480		Chr1	21302200	21308799	279.607
AT1G57490		Chr1	21302200	21308799	279.607
AT1G57500		Chr1	21302200	21308799	279.607
AT1G57510		Chr1	21302200	21308799	279.607
AT1G57520		Chr1	21302200	21308799	279.607
AT1G57530		Chr1	21302200	21308799	279.607
AT1G57565	SWI-SNF-related chromatin binding protein	Chr1	21319000	21327199	921.134
AT1G57570	Mannose-binding lectin superfamily protein	Chr1	21319000	21327199	921.134
AT1G57580	F-box family protein	Chr1	21319000	21327199	921.134
AT1G57690	F-box/RNI-like superfamily protein	Chr1	21365400	21369999	1906.12
AT1G57750	"CYTOCHROME P450, FAMILY 96, SUBFAMILY A, POLYPEPTIDE 15" (CYP96A15)	Chr1	21383800	21386399	467.451
AT1G57800	VARIANT IN METHYLATION 5 (VIM5)	Chr1	21408600	21413999	2119.02
AT1G57830	Toll-Interleukin-Resistance (TIR) domain family protein	Chr1	21418400	21423599	1454.89
AT1G57835		Chr1	21418400	21423599	1454.89
AT1G58037	Cysteine/Histidine-rich C1 domain family protein	Chr1	21472600	21474599	272.343
AT1G58090	F-box and associated interaction domains-containing protein	Chr1	21508800	21511199	340.274
AT1G58260	CYTOCHROME P450 79C2 (CYP79C2)	Chr1	21604600	21608599	1019.51
AT1G58265	Cytochrome P450 superfamily protein	Chr1	21610400	21614199	229.217
AT1G58270	(ZW9)	Chr1	21610400	21614199	229.217	37.4434
AT1G58300	HEME OXYGENASE 4 (ho4)	Chr1	21628200	21633599	887.608
AT1G58310	F-box/RNI-like superfamily protein	Chr1	21628200	21633599	887.608
AT1G58320	PLAC8 family protein	Chr1	21628200	21634599	480.86
AT1G58330	(ZW2)	Chr1	21640000	21641999	284.156	1.11744
AT1G58340	(ZF14)	Chr1	21653400	21655199	444.537
AT1G58766	B-block-binding subunit of TFIIIC protein	Chr1	21774200	21779799	203.546
AT1G58807	Disease resistance protein (CC-NBS-LRR class) family	Chr1	21780600	21784199	230.9	5.13505
AT1G59124	Disease resistance protein (CC-NBS-LRR class) family	Chr1	21818200	21820599	208.169	5.26604
AT1G59500	(GH3.4)	Chr1	21854200	21856799	311.418	2.00276
AT1G59670	GLUTATHIONE S-TRANSFERASE TAU 15 (GSTU15)	Chr1	21929800	21936799	1516.54
AT1G59675	F-box family protein	Chr1	21929800	21936799	1516.54
AT1G59680	EMBRYO SAC DEVELOPMENT ARREST 1 (EDA1)	Chr1	21929800	21936799	1516.54
AT1G59690	F-box associated ubiquitination effector family protein	Chr1	21929800	21936799	1516.54
AT1G59700	GLUTATHIONE S-TRANSFERASE TAU 16 (GSTU16)	Chr1	21929800	21936799	1516.54	2.21665
AT1G59722	hypothetical protein	Chr1	21944400	21945999	184.3
AT1G59790	Cullin family protein	Chr1	22000800	22003599	630.685
AT1G59800	Cullin family protein	Chr1	22004000	22009599	353.318
AT1G59810	AGAMOUS-LIKE 50 (AGL50)	Chr1	22004000	22009599	353.318
AT1G60040	AGAMOUS-LIKE 49 (AGL49)	Chr1	22118200	22126399	989.107
AT1G60050	UMAMIT35; USUALLY MULTIPLE ACIDS MOVE IN AND OUT TRANSPORTERS 35	Chr1	22118200	22126399	989.107
AT1G60060	Serine/threonine-protein kinase WNK (With No Lysine)-like protein	Chr1	22136400	22141599	920.628
AT1G60072	MICRORNA859A (MIR859A)	Chr1	22149800	22151999	342.772
AT1G60073	MICRORNA774A (MIR774A)	Chr1	22149800	22151999	342.772
AT1G60075		Chr1	22149800	22151999	342.772
AT1G60110	Mannose-binding lectin superfamily protein	Chr1	22168400	22171199	509.496
AT1G60180		Chr1	22196000	22197399	228.165
AT1G60250	B-BOX DOMAIN PROTEIN 26; BBX26	Chr1	22216800	22217999	309.12
AT1G60290		Chr1	22228800	22233999	531.289
AT1G60300	NAC (No Apical Meristem) domain transcriptional regulator superfamily protein	Chr1	22228800	22233999	531.289
AT1G60320	Toll-Interleukin-Resistance (TIR) domain family protein	Chr1	22234200	22237999	987.203
AT1G60330		Chr1	22234400	22240399	439.002
AT1G60350	NAC DOMAIN CONTAINING PROTEIN 24 (NAC024)	Chr1	22241200	22247999	2220.84
AT1G60360	RING/U-box superfamily protein	Chr1	22241200	22247999	2220.84
AT1G60370	KUK; KURZ UND KLEIN	Chr1	22241200	22247999	2220.84
AT1G60380	NAC (No Apical Meristem) domain transcriptional regulator superfamily protein	Chr1	22241200	22247999	2220.84
AT1G60390	POLYGALACTURONASE 1 (PG1)	Chr1	22241200	22247999	2220.84	4.35622
AT1G60400	F-box/RNI-like superfamily protein	Chr1	22251400	22261599	2686.27
AT1G60410	F-box family protein	Chr1	22251400	22261599	2686.27
AT1G60570	Galactose oxidase/kelch repeat superfamily protein	Chr1	22311600	22313399	959.686
AT1G60783	cyclin-dependent kinase inhibitor SMR2-like protein	Chr1	22374200	22379799	545.643
AT1G60980	GIBBERELLIN 20-OXIDASE 4 (GA20OX4)	Chr1	22452200	22459599	1188.1
AT1G60983	SCR-LIKE 8 (SCRL8)	Chr1	22452200	22459599	1188.1
AT1G60985	SCR-LIKE 6 (SCRL6)	Chr1	22452200	22459599	1188.1
AT1G60986	SCR-LIKE 4 (SCRL4)	Chr1	22452200	22459599	1188.1
AT1G61110	NAC DOMAIN CONTAINING PROTEIN 25 (NAC025)	Chr1	22515600	22519599	586.957
AT1G61120	TERPENE SYNTHASE 04 (TPS04)	Chr1	22521000	22532799	2793.65
AT1G61130	SERINE CARBOXYPEPTIDASE-LIKE 32 (SCPL32)	Chr1	22521000	22532799	2793.65
AT1G61270	Transmembrane amino acid transporter family protein	Chr1	22599000	22602399	460.949
AT1G61320	FBD / Leucine Rich Repeat domains containing protein	Chr1	22617200	22620399	416.505
AT1G61590	Protein kinase superfamily protein	Chr1	22723400	22726399	766.022
AT1G61630	EQUILIBRATIVE NUCLEOSIDE TRANSPORTER 7 (ENT7)	Chr1	22741400	22745799	1179.61
AT1G61650		Chr1	22749800	22756599	1314.55
AT1G61660	ATBHLH112	Chr1	22749800	22756599	1314.55	2.11071
AT1G61700	RNA polymerases N / 8 kDa subunit	Chr1	22787000	22788399	235.153
AT1G61750	Receptor-like protein kinase-related family protein	Chr1	22804400	22806399	938.015
AT1G62030	Cysteine/Histidine-rich C1 domain family protein	Chr1	22924400	22928399	207.744
AT1G62085	Mitochondrial transcription termination factor family protein	Chr1	22949600	22954799	521.215	2.545
AT1G62090		Chr1	22949600	22954799	521.215
AT1G62210	hypothetical protein	Chr1	22985800	22990399	1068.65
AT1G62214		Chr1	22985800	22990399	1068.65
AT1G62220	transmembrane protein	Chr1	22985800	22990399	1068.65
AT1G62225	transmembrane protein	Chr1	22985800	22990399	1068.65
AT1G62270	F-box and associated interaction domains-containing protein	Chr1	23002800	23007199	845.656
AT1G62340	ABNORMAL LEAF-SHAPE 1 (ALE1)	Chr1	23051200	23055999	812.838
AT1G62360	SHOOT MERISTEMLESS (STM)	Chr1	23058600	23065399	4343.06	2.51377
AT1G62440	LEUCINE-RICH REPEAT/EXTENSIN 2 (LRX2)	Chr1	23113200	23115399	276.593	3.96998
AT1G62500	Bifunctional inhibitor/lipid-transfer protein/seed storage 2S albumin superfamily protein	Chr1	23131600	23137199	3335.33
AT1G62510	Bifunctional inhibitor/lipid-transfer protein/seed storage 2S albumin superfamily protein	Chr1	23131600	23137199	3335.33
AT1G62540	FLAVIN-MONOOXYGENASE GLUCOSINOLATE S-OXYGENASE 2 (FMO GS-OX2)	Chr1	23151600	23152999	194.514
AT1G62560	FLAVIN-MONOOXYGENASE GLUCOSINOLATE S-OXYGENASE 3 (FMO GS-OX3)	Chr1	23159600	23162199	398.993
AT1G62660	Glycosyl hydrolases family 32 protein	Chr1	23201400	23203199	207.766	3.51262
AT1G62700	ARABIDOPSIS NAC DOMAIN CONTAINING PROTEIN 26 (ANAC026)	Chr1	23216000	23226999	2293.98	1.41088
AT1G62710	BETA VACUOLAR PROCESSING ENZYME (BETA-VPE)	Chr1	23216000	23226999	2293.98	2.24988
AT1G62980	EXPANSIN A18 (EXPA18)	Chr1	23331600	23334999	1405.31
AT1G62981	transmembrane protein%2C putative (DUF1191)	Chr1	23331600	23334999	1405.31
AT1G63030	DWARF AND DELAYED FLOWERING 2 (ddf2)	Chr1	23367600	23368799	239.401
AT1G63040		Chr1	23371400	23374199	522.44	2.45407
AT1G63060	ribosome biogenesis NEP1-like protein	Chr1	23384000	23387399	357.616
AT1G63070	pentatricopeptide (PPR) repeat-containing protein	Chr1	23384000	23387399	357.616
AT1G63190	Cystatin/monellin superfamily protein	Chr1	23430400	23442799	2500.04
AT1G63200	Cystatin/monellin superfamily protein	Chr1	23430400	23442799	2500.04
AT1G63205	Cystatin/monellin superfamily protein	Chr1	23430400	23442799	2500.04
AT1G63206	Cystatin/monellin superfamily protein	Chr1	23430400	23442799	2500.04
AT1G63295	Remorin family protein	Chr1	23474400	23476399	206.064
AT1G63450	ROOT HAIR SPECIFIC 8 (RHS8)	Chr1	23532600	23534399	245.365
AT1G63560		Chr1	23572400	23576399	782.541
AT1G63570	Receptor-like protein kinase-related family protein	Chr1	23572400	23576399	782.541
AT1G63880	Disease resistance protein (TIR-NBS-LRR class) family	Chr1	23711200	23716199	586.694
AT1G63910	MYB DOMAIN PROTEIN 103 (AtMYB103)	Chr1	23719800	23723999	327.714
AT1G63920		Chr1	23726400	23729199	1659.81
AT1G63930	FROM THE CZECH 'ROH' MEANING 'CORNER' (ROH1)	Chr1	23726400	23729199	1659.81
AT1G64000	WRKY DNA-BINDING PROTEIN 56 (WRKY56)	Chr1	23745600	23750399	1027.24
AT1G64010	Serine protease inhibitor (SERPIN) family protein	Chr1	23746000	23751599	382.851
AT1G64030	SERPIN 3 (SRP3)	Chr1	23752600	23756999	1258.91
AT1G64035		Chr1	23752600	23756999	1258.91
AT1G64235	Bifunctional inhibitor/lipid-transfer protein/seed storage 2S albumin superfamily protein	Chr1	23836000	23839999	268.866
AT1G64255	MuDR family transposase	Chr1	23844800	23847199	726.429
AT1G64480	CALCINEURIN B-LIKE PROTEIN 8 (CBL8)	Chr1	23948400	23951599	415.365
AT1G64590	NAD(P)-binding Rossmann-fold superfamily protein	Chr1	23993400	23995399	509.895
AT1G64780	AMMONIUM TRANSPORTER 1;2 (AMT1;2)	Chr1	24060800	24062799	1269.18
AT1G64900	"CYTOCHROME P450, FAMILY 89, SUBFAMILY A, POLYPEPTIDE 2" (CYP89A2)	Chr1	24113200	24116799	1847.51
AT1G64910	UDP-Glycosyltransferase superfamily protein	Chr1	24113200	24116799	1847.51
AT1G64920	UDP-Glycosyltransferase superfamily protein	Chr1	24117400	24118799	194.27
AT1G64930	"CYTOCHROME P450, FAMILY 87, SUBFAMILY A, POLYPEPTIDE 7" (CYP89A7)	Chr1	24120800	24122799	1008.48
AT1G64940	"CYTOCHROME P450, FAMILY 87, SUBFAMILY A, POLYPEPTIDE 6" (CYP89A6)	Chr1	24123600	24125399	284.603	6.34989
AT1G65050	TRAF-like superfamily protein	Chr1	24164400	24166199	236.467
AT1G65180	Cysteine/Histidine-rich C1 domain family protein	Chr1	24211800	24213799	230.977
AT1G65190	Protein kinase superfamily protein	Chr1	24214400	24219599	436.788
AT1G65200	Ubiquitin carboxyl-terminal hydrolase-related protein	Chr1	24214400	24219599	436.788
AT1G65330	PHERES1 (PHE1)	Chr1	24265000	24267399	226.462
AT1G65342	transmembrane protein	Chr1	24271000	24276399	369.303
AT1G65346	hypothetical protein	Chr1	24271000	24276399	369.303
AT1G65350	UBIQUITIN 13 (UBQ13)	Chr1	24271000	24276399	369.303
AT1G65385		Chr1	24289800	24293199	1034.01
AT1G65390	PHLOEM PROTEIN 2 A5 (PP2-A5)	Chr1	24289800	24293199	1034.01
AT1G65450	GLAUCE; GLC	Chr1	24315600	24318999	1331
AT1G65480	FLOWERING LOCUS T (FT)	Chr1	24332400	24334399	308.893
AT1G65481	transmembrane protein	Chr1	24339600	24346599	1210.47	15.021
AT1G65483	hypothetical protein	Chr1	24339600	24346599	1210.47
AT1G65490	transmembrane protein	Chr1	24352400	24355999	243.701
AT1G65570	Pectin lyase-like superfamily protein	Chr1	24374200	24376199	362.698
AT1G65620	ASYMMETRIC LEAVES 2 (AS2)	Chr1	24396800	24414599	7349.95
AT1G65630	DEGP PROTEASE 3 (DegP3)	Chr1	24396800	24414599	7349.95
AT1G65640	DEGP PROTEASE 4 (DegP4)	Chr1	24396800	24414599	7349.95
AT1G65642		Chr1	24396800	24414599	7349.95
AT1G65680	EXPANSIN B2 (EXPB2)	Chr1	24427000	24430799	850.067
AT1G65681	BETA EXPANSIN 6 (EXPB6)	Chr1	24427000	24430799	850.067
AT1G65740	UPWARD CURLY LEAF1 (UCL1)	Chr1	24447600	24453399	701.618
AT1G65760	ascorbic acid mannose pathway regulator (DUF295)	Chr1	24455600	24461999	1124.18
AT1G65770	ASCORBIC ACID MANNOSE PATHWAY REGULATOR 1 (AMR1)	Chr1	24455600	24461999	1124.18
AT1G65850	Disease resistance protein (TIR-NBS-LRR class) family	Chr1	24494800	24501199	970.35
AT1G65860	FLAVIN-MONOOXYGENASE GLUCOSINOLATE S-OXYGENASE 1 (FMO GS-OX1)	Chr1	24494800	24501199	970.35
AT1G65870	Disease resistance-responsive (dirigent-like protein) family protein	Chr1	24503400	24507399	1693.98
AT1G65875		Chr1	24503400	24507399	1693.98
AT1G65880	BENZOYLOXYGLUCOSINOLATE 1 (BZO1)	Chr1	24508400	24514999	1336.18
AT1G65890	ACYL ACTIVATING ENZYME 12 (AAE12)	Chr1	24508400	24514999	1336.18
AT1G65907		Chr1	24519600	24524799	1613.53
AT1G65910	NAC DOMAIN CONTAINING PROTEIN 28 (NAC028)	Chr1	24519600	24524799	1613.53
AT1G66000	hypothetical protein (DUF577)	Chr1	24574000	24577399	913.262
AT1G66010		Chr1	24574000	24577399	913.262
AT1G66020	Terpenoid cyclases/Protein prenyltransferases superfamily protein	Chr1	24577800	24581799	263.172
AT1G66120	ACYL-ACTIVATING ENZYME 11 (AAE11)	Chr1	24611800	24614999	742.482
AT1G66210	Subtilisin-like serine endopeptidase family protein	Chr1	24665800	24676199	1523.86
AT1G66220	Subtilase family protein	Chr1	24665800	24676199	1523.86
AT1G66270	(BGLU21)	Chr1	24700000	24703199	202.453	92.5666
AT1G66290	F-box/RNI-like superfamily protein	Chr1	24713000	24718799	1339.18
AT1G66300	F-box/RNI-like/FBD-like domains-containing protein	Chr1	24713000	24718799	1339.18
AT1G66310	F-box/RNI-like/FBD-like domains-containing protein	Chr1	24722800	24728799	1606.53
AT1G66320	F-box/RNI-like superfamily protein	Chr1	24722800	24728799	1606.53
AT1G66380	MYB DOMAIN PROTEIN 114 (MYB114)	Chr1	24756600	24758999	529.984
AT1G66390	MYB DOMAIN PROTEIN 90 (MYB90)	Chr1	24761200	24765599	917.429
AT1G66470	ROOT HAIR DEFECTIVE6 (RHD6)	Chr1	24795200	24796999	524.765	22.0663
AT1G66490	F-box and associated interaction domains-containing protein	Chr1	24808800	24810599	287.382
AT1G66630	Protein with RING/U-box and TRAF-like domain	Chr1	24855200	24859199	950.308
AT1G66640	RNI-like superfamily protein	Chr1	24855200	24859199	950.308
AT1G66710		Chr1	24878800	24884799	1556.94
AT1G66720	S-adenosyl-L-methionine-dependent methyltransferases superfamily protein	Chr1	24878800	24884799	1556.94
AT1G66725	MICRORNA163 (MIR163)	Chr1	24878800	24884799	1556.94
AT1G66783	MICRORNA157A (MIR157A)	Chr1	24912000	24915799	600.26
AT1G66850	Bifunctional inhibitor/lipid-transfer protein/seed storage 2S albumin superfamily protein	Chr1	24936600	24939199	1139.96
AT1G66852	Carbohydrate-binding X8 domain superfamily protein	Chr1	24936600	24939199	1139.96
AT1G66950	ATP-BINDING CASSETTE G39 (ABCG39)	Chr1	24975800	24979799	582.317
AT1G66960	(LUP5)	Chr1	24986000	24990799	393.843
AT1G67100	LOB DOMAIN-CONTAINING PROTEIN 40 (LBD40)	Chr1	25053400	25054999	709.266	7.00647
AT1G67110	"CYTOCHROME P450, FAMILY 735, SUBFAMILY A, POLYPEPTIDE 2" (CYP735A2)	Chr1	25060800	25062599	348.227
AT1G67130	F-box family protein	Chr1	25098200	25100599	287.555
AT1G67160	F-box/kelch-repeat protein%2C putative (DUF295)	Chr1	25126000	25127199	186.409
AT1G67260	(TCP1)	Chr1	25165600	25174199	2796.29
AT1G67270	Zinc-finger domain of monoamine-oxidase A repressor R1 protein	Chr1	25183000	25185999	659.098
AT1G67328		Chr1	25214000	25214999	307.803
AT1G67330	glucuronoxylan 4-O-methyltransferase-like protein (DUF579)	Chr1	25214000	25214999	307.803
AT1G67390	F-box family protein	Chr1	25244400	25246599	196.054
AT1G67450	F-box and associated interaction domains-containing protein	Chr1	25266000	25269199	413.665
AT1G67455	F-box and associated interaction domains-containing protein	Chr1	25266000	25269199	413.665
AT1G67610		Chr1	25339200	25342799	352.947
AT1G67620	Lojap-related protein	Chr1	25339200	25342799	352.947	2.04889
AT1G67623	F-box family protein	Chr1	25339200	25342799	352.947
AT1G67750	Pectate lyase family protein	Chr1	25398600	25406199	1589.78
AT1G67760	TCP-1/cpn60 chaperonin family protein	Chr1	25398600	25406199	1589.78	2.15151
AT1G67770	TERMINAL EAR1-LIKE 2 (TEL2)	Chr1	25407800	25410199	962.029
AT1G67860	transmembrane protein	Chr1	25444600	25453199	3584.13
AT1G67865	hypothetical protein	Chr1	25444600	25453199	3584.13
AT1G67870	glycine-rich protein	Chr1	25444600	25453199	3584.13
AT1G67875		Chr1	25444600	25453199	3584.13
AT1G68040	S-adenosyl-L-methionine-dependent methyltransferases superfamily protein	Chr1	25502200	25505599	1508.54
AT1G68130	INDETERMINATE(ID)-DOMAIN 14 (IDD14)	Chr1	25530800	25535799	1904.98	1.2014
AT1G68170	nodulin MtN21 /EamA-like transporter family protein	Chr1	25550600	25554199	323.508
AT1G68180	RING/U-box superfamily protein	Chr1	25555000	25555799	232.518
AT1G68250	hypothetical protein	Chr1	25578000	25580599	672.902
AT1G68270	AMP-dependent synthetase and ligase family protein	Chr1	25588200	25590599	545.189
AT1G68280	ACYL-LIPID THIOESTERASE 4; ALT4	Chr1	25591600	25594599	552.763
AT1G68350	cotton fiber protein	Chr1	25616400	25618999	420.334
AT1G68380	Core-2/I-branching beta-1%2C6-N-acetylglucosaminyltransferase family protein	Chr1	25635600	25636599	193.197
AT1G68480	JAGGED (JAG)	Chr1	25682600	25687999	3042.41
AT1G68500	hypothetical protein	Chr1	25701600	25704199	300.895
AT1G68510	LOB DOMAIN-CONTAINING PROTEIN 42 (LBD42)	Chr1	25705000	25715799	4468.67
AT1G68520	B-BOX DOMAIN PROTEIN 14; BBX14	Chr1	25705000	25715799	4468.67
AT1G68526	hypothetical protein	Chr1	25705000	25715799	4468.67
AT1G68530	3-KETOACYL-COA SYNTHASE 6 (KCS6)	Chr1	25705000	25715799	4468.67	37.9041
AT1G68670	HHO2	Chr1	25782200	25784199	408.572	5.19759
AT1G68810	basic helix-loop-helix (bHLH) DNA-binding superfamily protein	Chr1	25859600	25863999	1694.94	3.41086
AT1G68825	ROTUNDIFOLIA LIKE 15 (RTFL15)	Chr1	25869600	25870799	249.979
AT1G68875	hypothetical protein	Chr1	25892000	25895199	275.742
AT1G68880	BASIC LEUCINE-ZIPPER 8 (bZIP)	Chr1	25892000	25895199	275.742
AT1G69090	F-box protein (DUF295)	Chr1	25974800	25988799	4724.19
AT1G69100	Eukaryotic aspartyl protease family protein	Chr1	25974800	25988799	4724.19
AT1G69110		Chr1	25974800	25988799	4724.19
AT1G69120	APETALA1 (AP1)	Chr1	25974800	25988799	4724.19
AT1G69140		Chr1	25991200	25995399	1364.62
AT1G69150	Cysteine/Histidine-rich C1 domain family protein	Chr1	25991200	25995399	1364.62
AT1G69160	suppressor	Chr1	25999600	26001599	248.6
AT1G69180	CRABS CLAW (CRC)	Chr1	26007400	26014999	1686.56
AT1G69190	Dihydropterin pyrophosphokinase / Dihydropteroate synthase	Chr1	26007400	26014999	1686.56
AT1G69240	METHYL ESTERASE 15 (MES15)	Chr1	26028800	26030399	270.552
AT1G69560	MYB DOMAIN PROTEIN 105 (MYB105)	Chr1	26157400	26159599	995.796
AT1G69650	TRAF-like family protein	Chr1	26196800	26201599	824.497
AT1G69660	TRAF-like family protein	Chr1	26196800	26201599	824.497
AT1G69690	TEOSINTE BRANCHED1/CYCLOIDEA/PCF 15 (TCP15)	Chr1	26216000	26218799	899.469	1.64357
AT1G69870	NITRATE TRANSPORTER 1.7 (NRT1.7)	Chr1	26316000	26317999	246.996
AT1G69970	CLAVATA3/ESR-RELATED 26 (CLE26)	Chr1	26353000	26354799	466.007
AT1G70020	transmembrane protein%2C putative (DUF1163)	Chr1	26377200	26379399	291.726
AT1G70030	Paired amphipathic helix (PAH2) superfamily protein	Chr1	26377200	26379399	291.726
AT1G70170	MATRIX METALLOPROTEINASE (MMP)	Chr1	26423800	26425599	1197.68
AT1G70260	UMAMIT36; USUALLY MULTIPLE ACIDS MOVE IN AND OUT TRANSPORTERS 36	Chr1	26456800	26460399	1452.58
AT1G70270	transcription factor	Chr1	26463000	26464999	188.724	1.47927
AT1G70380	F-box and associated interaction domains-containing protein	Chr1	26525200	26527399	189.75
AT1G70390	F-box and associated interaction domains-containing protein	Chr1	26529000	26530599	197.299	2.53195
AT1G70510	KNOTTED-LIKE FROM ARABIDOPSIS THALIANA 2 (KNAT2)	Chr1	26573800	26579399	1241.33
AT1G70560	TRYPTOPHAN AMINOTRANSFERASE OF ARABIDOPSIS 1 (TAA1)	Chr1	26604000	26607799	231.225	1.29712
AT1G70640	octicosapeptide/Phox/Bem1p (PB1) domain-containing protein	Chr1	26636000	26637199	203.197
AT1G70720	Plant invertase/pectin methylesterase inhibitor superfamily protein	Chr1	26666400	26667599	240.645
AT1G70830	MLP-LIKE PROTEIN 28 (MLP28)	Chr1	26709600	26711799	661	28.6267
AT1G70840	MLP-LIKE PROTEIN 31 (MLP31)	Chr1	26713000	26716999	962.822
AT1G70850	MLP-LIKE PROTEIN 34 (MLP34)	Chr1	26713000	26716999	962.822	6.11447
AT1G70880	Polyketide cyclase/dehydrase and lipid transport superfamily protein	Chr1	26722200	26726599	742.16
AT1G70885		Chr1	26722200	26726599	742.16
AT1G70890	MLP-LIKE PROTEIN 43 (MLP43)	Chr1	26722200	26726599	742.16
AT1G70970	F-box and associated interaction domains-containing protein	Chr1	26758200	26761599	395.588
AT1G70990	proline-rich family protein	Chr1	26767400	26768199	202.59
AT1G71000	Chaperone DnaJ-domain superfamily protein	Chr1	26769400	26770399	188.325
AT1G71002	MICRORNA858A (MIR858A)	Chr1	26771400	26774199	468.017
AT1G71390	RECEPTOR LIKE PROTEIN 11 (RLP11)	Chr1	26904200	26908999	1701.08
AT1G71680	Transmembrane amino acid transporter family protein	Chr1	26944600	26946399	360.187
AT1G71690	glucuronoxylan 4-O-methyltransferase-like protein (DUF579)	Chr1	26948600	26956199	2379.9
AT1G71691	GDSL-like Lipase/Acylhydrolase superfamily protein	Chr1	26948600	26956199	2379.9
AT1G71692	AGAMOUS-LIKE 12 (AGL12)	Chr1	26948600	26956199	2379.9
AT1G71695	Peroxidase superfamily protein	Chr1	26965200	26966799	794.5	23.3472
AT1G71770	POLY(A)-BINDING PROTEIN 5 (PAB5)	Chr1	26992200	26993799	600.782	2.80939
AT1G71880	SUCROSE-PROTON SYMPORTER 1 (SUC1)	Chr1	27054200	27055999	251.367	1.46975
AT1G71890	(SUC5)	Chr1	27058200	27059999	1019.92
AT1G71960	ATP-BINDING CASETTE G25 (ABCG25)	Chr1	27086800	27087999	771.886
AT1G72100	late embryogenesis abundant domain-containing protein / LEA domain-containing protein	Chr1	27127000	27131399	563.129
AT1G72110	O-acyltransferase (WSD1-like) family protein	Chr1	27127000	27131399	563.129
AT1G72125	Major facilitator superfamily protein	Chr1	27134800	27136399	231.717
AT1G72140	Major facilitator superfamily protein	Chr1	27141200	27144599	1317.68	1.07575
AT1G72290	Kunitz family trypsin and protease inhibitor protein	Chr1	27215200	27216999	639.689
AT1G72570	Integrase-type DNA-binding superfamily protein	Chr1	27331400	27337199	2559.97
AT1G72580	hypothetical protein	Chr1	27331400	27337199	2559.97
AT1G72590	POLYPRENOL REDUCTASE 1; PPRD1	Chr1	27331400	27337199	2559.97	2.55509
AT1G72800	RNA-binding (RRM/RBD/RNP motifs) family protein	Chr1	27397200	27398399	332.39	7.36481
AT1G73120	F-box/RNI superfamily protein	Chr1	27497000	27498199	324.024
AT1G73325	Kunitz family trypsin and protease inhibitor protein	Chr1	27567600	27569999	326.534
AT1G73330	DROUGHT-REPRESSED 4 (DR4)	Chr1	27567600	27569999	326.534
AT1G73410	MYB DOMAIN PROTEIN 54 (MYB54)	Chr1	27601000	27603399	847.766
AT1G73830	BR ENHANCED EXPRESSION 3 (BEE3)	Chr1	27759800	27761199	338.615
AT1G73850	DNA ligase (DUF1666)	Chr1	27767200	27769999	689.133
AT1G73870	B-BOX DOMAIN PROTEIN 16; BBX16; COL7; CONSTANS-LIKE 7	Chr1	27778800	27780399	573.256
AT1G74110	"CYTOCHROME P450, FAMILY 78, SUBFAMILY A, POLYPEPTIDE 10" (CYP78A10)	Chr1	27866800	27868799	869.002
AT1G74610		Chr1	28028000	28029199	343.283
AT1G74620	RING/U-box superfamily protein	Chr1	28028000	28029199	343.283
AT1G74810	(BOR5)	Chr1	28110600	28112799	205.306
AT1G74820	RmlC-like cupins superfamily protein	Chr1	28111800	28112799	413.592
AT1G75040	PATHOGENESIS-RELATED GENE 5 (PR5)	Chr1	28177800	28178999	223.395
AT1G75240	HOMEOBOX PROTEIN 33 (HB33)	Chr1	28237200	28243199	3242.24
AT1G75620	glyoxal oxidase-related protein	Chr1	28394800	28396799	1296.76
AT1G75790	SKU5 SIMILAR 18 (sks18)	Chr1	28455000	28457399	621.373
AT1G75830	LOW-MOLECULAR-WEIGHT CYSTEINE-RICH 67 (LCR67)	Chr1	28472200	28473599	545.283	54.1288
AT1G75870	hypothetical protein	Chr1	28486200	28488399	435.304
AT1G75880	SGNH hydrolase-type esterase superfamily protein	Chr1	28489200	28492399	193.222	1.47695
AT1G75890	GDSL-like Lipase/Acylhydrolase superfamily protein	Chr1	28492800	28495599	301.54
AT1G75891		Chr1	28492800	28495599	301.54
AT1G75910	EXTRACELLULAR LIPASE 4 (EXL4)	Chr1	28501400	28503199	191.635
AT1G75920	GDSL-like Lipase/Acylhydrolase superfamily protein	Chr1	28505400	28510399	578.445
AT1G75930	EXTRACELLULAR LIPASE 6 (EXL6)	Chr1	28505400	28510399	578.445
AT1G75940	(ATA27)	Chr1	28510800	28513999	360.149
AT1G76100	PLASTOCYANIN 1 (PETE1)	Chr1	28554000	28554999	484.698
AT1G76110	HMG (high mobility group) box protein with ARID/BRIGHT DNA-binding domain-containing protein	Chr1	28556200	28557799	195.59
AT1G76130	ALPHA-AMYLASE-LIKE 2 (AMY2)	Chr1	28562400	28569999	1762.76
AT1G76135	MICRORNA394B (MIR394B)	Chr1	28562400	28569999	1762.76
AT1G76220	hypothetical protein (DUF241)	Chr1	28598000	28600399	190.75
AT1G76230	hypothetical protein	Chr1	28598400	28600599	270.143
AT1G76240	DUF241 domain protein (DUF241)	Chr1	28601600	28604399	1700.76
AT1G76250	transmembrane protein	Chr1	28606400	28607599	646.823
AT1G76430	PHOSPHATE TRANSPORTER 1;9 (PHT1;9)	Chr1	28679000	28680199	389.211
AT1G76610	MIZU-KUSSEI-like protein (Protein of unknown function%2C DUF617)	Chr1	28750800	28751799	479.54	2.59559
AT1G76800	ATVTL2; VACUOLAR IRON TRANSPORTER-LIKE 2; VTL2	Chr1	28828800	28830199	814.383
AT1G76820	eukaryotic translation initiation factor 2 (eIF-2) family protein	Chr1	28841400	28845599	369.074	2.56901
AT1G76830	F-box and associated interaction domains-containing protein	Chr1	28841400	28845599	369.074
AT1G76910	hypothetical protein	Chr1	28885400	28887999	192.88
AT1G76911		Chr1	28885400	28887999	192.88
AT1G77110	PIN-FORMED 6 (PIN6)	Chr1	28970600	28972399	586.148	1.24796
AT1G77160	hypothetical protein (DUF506)	Chr1	28994200	28996799	621.536	4.65165
AT1G77650	F-box associated ubiquitination effector family protein	Chr1	29181200	29183199	362.749
AT1G77655	hypothetical protein	Chr1	29181200	29183199	362.749
AT1G77700	Pathogenesis-related thaumatin superfamily protein	Chr1	29205000	29206199	419.91
AT1G77780	Glycosyl hydrolase superfamily protein	Chr1	29248400	29249599	483.893
AT1G77790	Glycosyl hydrolase superfamily protein	Chr1	29250600	29251799	310.686
AT1G77990	(AST56)	Chr1	29320800	29325599	1019.01
AT1G77992		Chr1	29320800	29325599	1019.01
AT1G78260	RNA-binding (RRM/RBD/RNP motifs) family protein	Chr1	29447200	29450199	427.01
AT1G78330		Chr1	29470200	29471599	181.599
AT1G78450	SOUL heme-binding family protein	Chr1	29516200	29519399	892.733
AT1G78460	SOUL heme-binding family protein	Chr1	29516200	29519399	892.733
AT1G78470	F-box/LRR protein	Chr1	29521000	29523199	192.471
AT1G78490	"CYTOCHROME P450, FAMILY 708, SUBFAMILY A, POLYPEPTIDE 3" (CYP708A3)	Chr1	29527800	29530399	557.79
AT1G78500	Terpenoid cyclases family protein	Chr1	29531200	29532599	390.844
AT1G78640	B3 domain protein	Chr1	29578600	29582199	969.617
AT1G78710	TRICHOME BIREFRINGENCE-LIKE 42 (TBL42)	Chr1	29602800	29604799	407.914
AT1G78740	RNI-like superfamily protein	Chr1	29610000	29612599	253.201
AT1G78815	LIGHT SENSITIVE HYPOCOTYLS 7 (LSH7)	Chr1	29630800	29632799	1615.31
AT1G78820	D-mannose binding lectin protein with Apple-like carbohydrate-binding domain-containing protein	Chr1	29634600	29635999	558.998	1.39681
AT1G78970	LUPEOL SYNTHASE 1 (LUP1)	Chr1	29703000	29705799	334.434
AT1G79250	AGC KINASE 1.7 (AGC1.7)	Chr1	29810200	29811999	184.746
AT1G79430	ALTERED PHLOEM DEVELOPMENT (APL)	Chr1	29875000	29880799	3210.62
AT1G79580	SOMBRERO (SMB)	Chr1	29942200	29944399	640.483	13.9129
AT1G79680	WALL ASSOCIATED KINASE (WAK)-LIKE 10 (WAKL10)	Chr1	29980000	29982599	316.054	2.50256
AT1G79760	DOWNSTREAM TARGET OF AGL15-4 (DTA4)	Chr1	30012000	30015399	1353.5
AT1G79770	CASP-like protein (DUF1677)	Chr1	30012000	30015399	1353.5
AT1G79840	GLABRA 2 (GL2)	Chr1	30036000	30040199	2340.3
AT1G79860	RHO GUANYL-NUCLEOTIDE EXCHANGE FACTOR 12 (ROPGEF12)	Chr1	30042200	30044399	885.327
AT1G80130	Tetratricopeptide repeat (TPR)-like superfamily protein	Chr1	30141200	30142999	291.545
AT1G80133	ATEPFL8	Chr1	30143400	30144999	242.065
AT1G80330	GIBBERELLIN 3-OXIDASE 4 (GA3OX4)	Chr1	30198800	30199799	199.993
AT1G80340	GIBBERELLIN 3-OXIDASE 2 (GA3OX2)	Chr1	30201400	30205199	971.676	1.76716
AT1G80390	INDOLE-3-ACETIC ACID INDUCIBLE 15 (IAA15)	Chr1	30222200	30223399	302.858
AT1G80580	Integrase-type DNA-binding superfamily protein	Chr1	30293400	30294399	291.977	1.45308
AT1G80760	NOD26-LIKE INTRINSIC PROTEIN 6;1 (NIP6;1)	Chr1	30350800	30352399	369.728
AT1G80990	XH domain-containing protein	Chr1	30424400	30426799	347.425
AT1G81001		Chr1	30424400	30426799	347.425	1.34125
AT1G81020		Chr1	30424200	30427599	376.093
AT2G01008	maternal effect embryo arrest protein	Chr2	1000	10599	39439.1	18.253
AT2G01023	hypothetical protein	Chr2	1000	10599	39439.1	82.5304
AT2G01500	PRETTY FEW SEEDS 2 (PFS2)	Chr2	224800	226399	217.258
AT2G01520	MLP-LIKE PROTEIN 328 (MLP328)	Chr2	235400	237599	387.358
AT2G01770	VACUOLAR IRON TRANSPORTER 1 (VIT1)	Chr2	335600	337999	294.504
AT2G01900	DNAse I-like superfamily protein	Chr2	405600	409599	801.887
AT2G01940	SHOOT GRAVITROPISM 5 (SGR5)	Chr2	430200	437399	2860.63
AT2G02000	GLUTAMATE DECARBOXYLASE 3 (GAD3)	Chr2	470400	472799	199.303
AT2G02010	GLUTAMATE DECARBOXYLASE 4 (GAD4)	Chr2	474400	476599	242.947
AT2G02070	INDETERMINATE(ID)-DOMAIN 5 (IDD5)	Chr2	504400	511399	3084.04
AT2G02080	INDETERMINATE(ID)-DOMAIN 4 (IDD4)	Chr2	516400	522999	2577.76
AT2G02290	Haloacid dehalogenase-like hydrolase (HAD) superfamily protein	Chr2	602600	605399	366.238
AT2G02310	PHLOEM PROTEIN 2-B6 (PP2-B6)	Chr2	608400	611599	459.854
AT2G02320	PHLOEM PROTEIN 2-B7 (PP2-B7)	Chr2	608400	611599	459.854	6.22621
AT2G02450	LONG VEGETATIVE PHASE 1 (LOV1)	Chr2	646200	651799	1386.03
AT2G02540	HOMEOBOX PROTEIN 21 (HB21)	Chr2	682600	685799	1564.96
AT2G02610	Cysteine/Histidine-rich C1 domain family protein	Chr2	710600	713799	1473.22
AT2G02620	Cysteine/Histidine-rich C1 domain family protein	Chr2	717000	719999	1250.14
AT2G02630	Cysteine/Histidine-rich C1 domain family protein	Chr2	723600	725999	411.334
AT2G02640	Cysteine/Histidine-rich C1 domain family protein	Chr2	730200	736799	2485.36
AT2G02650	Ribonuclease H-like superfamily protein	Chr2	730200	736799	2485.36
AT2G02660	F-box associated ubiquitination effector family protein	Chr2	738200	743199	699.599
AT2G02670		Chr2	738200	743199	699.599
AT2G02680	Cysteine/Histidine-rich C1 domain family protein	Chr2	745800	747799	434.001	3.90504
AT2G02770	4'-phosphopantetheinyl transferase domain protein	Chr2	778000	780399	188.234	2.56784
AT2G03000	RING/U-box superfamily protein	Chr2	875000	877199	700.062
AT2G03020	Heat shock protein HSP20/alpha crystallin family	Chr2	883400	884199	184.951
AT2G03030	Toll-Interleukin-Resistance (TIR) domain family protein	Chr2	887400	893599	2502.99
AT2G03040	emp24/gp25L/p24 family/GOLD family protein	Chr2	887400	893599	2502.99
AT2G03160	SKP1-LIKE 19 (SK19)	Chr2	959400	965199	3561.27
AT2G03170	SKP1-LIKE 14 (SK14)	Chr2	959400	965199	3561.27
AT2G03180	hypothetical protein	Chr2	959400	965199	3561.27
AT2G03190	SKP1-LIKE 16 (SK16)	Chr2	959400	965199	3561.27
AT2G03250	EXS (ERD1/XPR1/SYG1) family protein	Chr2	982400	986599	678.955
AT2G03290	emp24/gp25L/p24 family/GOLD family protein	Chr2	999400	1002399	1634.52
AT2G03291		Chr2	999400	1002399	1634.52
AT2G03300	ATTX12	Chr2	1003400	1004399	191.068
AT2G03320	hypothetical protein	Chr2	1007600	1009399	185.775
AT2G03500	EARLY FLOWERING MYB PROTEIN; EFM; HHO4; HRS1 HOMOLOG4	Chr2	1055600	1063199	2721.98
AT2G03550	alpha/beta-Hydrolases superfamily protein	Chr2	1076400	1081599	1175.89
AT2G03560	F-box only protein (DUF295)	Chr2	1076400	1081599	1175.89
AT2G03710	SEPALLATA 4 (SEP4)	Chr2	1127400	1131399	455.493
AT2G03900		Chr2	1191000	1195799	724.984
AT2G03910		Chr2	1191000	1195799	724.984
AT2G03972		Chr2	1253600	1256399	441.348
AT2G04020	GDSL-like Lipase/Acylhydrolase superfamily protein	Chr2	1274000	1278599	648.233
AT2G04025	ROOT MERISTEM GROWTH FACTOR 3 (RGF3)	Chr2	1274000	1278599	648.233	3.17095
AT2G04032	ZINC TRANSPORTER 7 PRECURSOR (ZIP7)	Chr2	1289400	1291799	349.105
AT2G04045	Defensin-like (DEFL) family protein	Chr2	1314600	1317599	215.141
AT2G04046	Defensin-like (DEFL) family protein	Chr2	1314600	1317599	215.141
AT2G04047		Chr2	1314600	1317599	215.141
AT2G04090	MATE efflux family protein	Chr2	1362400	1365599	226.697	1.29601
AT2G04300	Leucine-rich repeat protein kinase family protein	Chr2	1493000	1498799	330.388
AT2G04420	Polynucleotidyl transferase%2C ribonuclease H-like superfamily protein	Chr2	1535200	1536599	390.626
AT2G04480	hypothetical protein	Chr2	1552200	1555799	502.62	1.3107
AT2G04570	GDSL-like Lipase/Acylhydrolase superfamily protein	Chr2	1594600	1596199	265.626
AT2G04680	Cysteine/Histidine-rich C1 domain family protein	Chr2	1639400	1642199	509.501
AT2G04800	hypothetical protein	Chr2	1685800	1690399	621.467
AT2G04810	F-box only protein (DUF295)	Chr2	1685800	1690399	621.467
AT2G04830	F-box only protein (DUF295)	Chr2	1691600	1695999	970.899
AT2G04840	F-box only protein (DUF295)	Chr2	1696600	1697999	439.429
AT2G04920	F-box and associated interaction domains-containing protein	Chr2	1726000	1728799	236.155
AT2G04930	Haloacid dehalogenase-like hydrolase (HAD) superfamily protein	Chr2	1731400	1735399	703.136
AT2G05133		Chr2	1851600	1855199	526.997
AT2G05140	phosphoribosylaminoimidazole carboxylase family protein / AIR carboxylase family protein	Chr2	1851600	1855199	526.997	1.53444
AT2G05380	GLYCINE-RICH PROTEIN 3 SHORT ISOFORM (GRP3S)	Chr2	1965800	1969399	548.26	1.2372
AT2G05400	Ubiquitin-specific protease family C19-related protein	Chr2	1973200	1990799	4730.24
AT2G05410	MATH domain/coiled-coil protein	Chr2	1973200	1990799	4730.24
AT2G05420	TRAF-like family protein	Chr2	1973200	1990799	4730.24
AT2G05430	Ubiquitin-specific protease family C19-related protein	Chr2	1973200	1990799	4730.24
AT2G05440	GLYCINE RICH PROTEIN 9 (GRP9)	Chr2	1993000	1996399	1659.44	25.9301
AT2G05441		Chr2	1993000	1996399	1659.44
AT2G05500		Chr2	2010200	2014799	243.245
AT2G05510	Glycine-rich protein family	Chr2	2015800	2016999	184.68	899.253
AT2G05530	Glycine-rich protein family	Chr2	2028000	2031599	327.034
AT2G05540	Glycine-rich protein family	Chr2	2032200	2034399	547.396	14.9214
AT2G05580	Glycine-rich protein family	Chr2	2053800	2057399	2218.22
AT2G05730		Chr2	2150200	2153399	236.081
AT2G05850	SERINE CARBOXYPEPTIDASE-LIKE 38 (scpl38)	Chr2	2241800	2244799	532.742
AT2G07040	(PRK2A)	Chr2	2917200	2919199	395.024
AT2G07042		Chr2	2919800	2922399	878.285
AT2G07120	F-box associated ubiquitination effector family protein	Chr2	2953600	2958599	644.295
AT2G07130		Chr2	2953600	2958599	644.295
AT2G07140	F-box and associated interaction domains-containing protein	Chr2	2953600	2958599	644.295
AT2G07663		Chr2	3401400	3422599	963.942
AT2G07666		Chr2	3423000	3509799	7611.93
AT2G07670		Chr2	3423000	3509799	7611.93
AT2G07671	ATP synthase subunit C family protein	Chr2	3239000	3258599	1764.13	9.13372
AT2G07672	hypothetical protein	Chr2	3239000	3258599	1764.13
AT2G07712		Chr2	3401400	3422599	963.942
AT2G07713	hypothetical protein	Chr2	3401400	3422599	963.942
AT2G07714	transcription factor-like protein	Chr2	3401400	3422599	963.942
AT2G07715	Nucleic acid-binding%2C OB-fold-like protein	Chr2	3401400	3422599	963.942	1.80614
AT2G07716		Chr2	3401400	3422599	963.942
AT2G07717		Chr2	3401400	3422599	963.942	1.12588
AT2G07718	Cytochrome b/b6 protein	Chr2	3423000	3509799	7611.93
AT2G07719	Putative membrane lipoprotein	Chr2	3423000	3509799	7611.93
AT2G07721	hypothetical protein	Chr2	3423000	3509799	7611.93
AT2G07722	transmembrane protein	Chr2	3423000	3509799	7611.93
AT2G07723		Chr2	3423000	3509799	7611.93	1.93156
AT2G07724	hypothetical protein	Chr2	3423000	3509799	7611.93
AT2G07725	Ribosomal L5P family protein	Chr2	3423000	3509799	7611.93	3.81182
AT2G07726		Chr2	3423000	3509799	7611.93
AT2G07727	cytochrome b	Chr2	3423000	3509799	7611.93	2.74975
AT2G07728	hypothetical protein	Chr2	3423000	3509799	7611.93
AT2G07731		Chr2	3423000	3509799	7611.93	1.17583
AT2G07732	Ribulose bisphosphate carboxylase large chain%2C catalytic domain-containing protein	Chr2	3423000	3509799	7611.93
AT2G07733		Chr2	3423000	3509799	7611.93	1.2099
AT2G07734	Alpha-L RNA-binding motif/Ribosomal protein S4 family protein	Chr2	3423000	3509799	7611.93	1.68482
AT2G07738	hypothetical protein	Chr2	3423000	3509799	7611.93
AT2G07739	Ycf1 protein	Chr2	3423000	3509799	7611.93
AT2G07741	ATPase%2C F0 complex%2C subunit A protein	Chr2	3423000	3509799	7611.93	2.10922
AT2G07742		Chr2	3239000	3258599	1764.13
AT2G07743		Chr2	3239000	3258599	1764.13
AT2G07747		Chr2	3239000	3258599	1764.13
AT2G07749	Mitovirus RNA-dependent RNA polymerase	Chr2	3239000	3258599	1764.13
AT2G07756		Chr2	3423000	3509799	7611.93
AT2G07757		Chr2	3423000	3509799	7611.93
AT2G07758		Chr2	3423000	3509799	7611.93
AT2G07759		Chr2	3423000	3509799	7611.93
AT2G07761		Chr2	3423000	3509799	7611.93
AT2G07762		Chr2	3423000	3509799	7611.93
AT2G07763		Chr2	3423000	3509799	7611.93
AT2G07764		Chr2	3423000	3509799	7611.93
AT2G07765		Chr2	3423000	3509799	7611.93
AT2G07766		Chr2	3423000	3509799	7611.93
AT2G07771	ATP-BINDING CASSETTE I5 (ABCI5)	Chr2	3239000	3258599	1764.13
AT2G07773	cytochrome B/B6 protein	Chr2	3239000	3258599	1764.13
AT2G07775	hypothetical protein	Chr2	3423000	3509799	7611.93
AT2G07776	hypothetical protein	Chr2	3239000	3258599	1764.13
AT2G07777	ATP synthase 9 mitochondrial	Chr2	3239000	3258599	1764.13
AT2G07779	hypothetical protein	Chr2	3239000	3258599	1764.13
AT2G07787	hypothetical protein	Chr2	3423000	3509799	7611.93
AT2G07795	transmembrane protein	Chr2	3423000	3509799	7611.93
AT2G07799		Chr2	3423000	3509799	7611.93
AT2G07806	hypothetical protein	Chr2	3423000	3509799	7611.93
AT2G07807		Chr2	3423000	3509799	7611.93
AT2G07809		Chr2	3423000	3509799	7611.93
AT2G07812		Chr2	3239000	3258599	1764.13
AT2G07815	LOW protein: cytochrome C biogenesis ccmF-like protein	Chr2	3423000	3509799	7611.93
AT2G07820	hypothetical protein	Chr2	3423000	3509799	7611.93
AT2G07825	hypothetical protein	Chr2	3423000	3509799	7611.93
AT2G07827	hypothetical protein	Chr2	3423000	3509799	7611.93
AT2G07830	hypothetical protein	Chr2	3423000	3509799	7611.93
AT2G07835	hypothetical protein	Chr2	3423000	3509799	7611.93
AT2G07981	hypothetical protein	Chr2	3614400	3628399	47314.6
AT2G10940	Bifunctional inhibitor/lipid-transfer protein/seed storage 2S albumin superfamily protein	Chr2	4311000	4313199	1316.53
AT2G12190	Cytochrome P450 superfamily protein	Chr2	4891800	4893399	362.614	6.69559
AT2G13350	Calcium-dependent lipid-binding (CaLB domain) family protein	Chr2	5536400	5538399	187.912
AT2G13550	hypothetical protein	Chr2	5648200	5649599	468.102
AT2G13630	F-box associated ubiquitination effector family protein	Chr2	5684200	5685799	304.464
AT2G13810	AGD2-LIKE DEFENSE RESPONSE PROTEIN 1 (ALD1)	Chr2	5767000	5774999	1745.09
AT2G13820	XYLOGEN PROTEIN 2 (XYP2)	Chr2	5767000	5774999	1745.09	8.12253
AT2G13900	Cysteine/Histidine-rich C1 domain family protein	Chr2	5833000	5835999	635.241
AT2G13920		Chr2	5843800	5845599	314.844
AT2G13950	Cysteine/Histidine-rich C1 domain family protein	Chr2	5857400	5860799	739.603
AT2G13960	Homeodomain-like superfamily protein	Chr2	5857400	5860799	739.603
AT2G14070	wound-responsive protein-like protein	Chr2	5921400	5923799	403.696
AT2G14080	Disease resistance protein (TIR-NBS-LRR class) family	Chr2	5925000	5927399	185.368
AT2G14206		Chr2	6013800	6017399	1010.01
AT2G14210	AGAMOUS-LIKE 44 (AGL44)	Chr2	6018600	6024799	692.354	3.75057
AT2G14500	F-box family protein	Chr2	6167000	6169599	232.387
AT2G14550		Chr2	6202800	6205599	1237.99
AT2G14560	LATE UPREGULATED IN RESPONSE TO HYALOPERONOSPORA PARASITICA (LURP1)	Chr2	6212000	6216399	1123.86
AT2G14580	BASIC PATHOGENESIS-RELATED PROTEIN 1 (PRB1)	Chr2	6225000	6226399	198.907
AT2G14610	PATHOGENESIS-RELATED GENE 1 (PR1)	Chr2	6241200	6242599	507.532	1.10165
AT2G14692	hypothetical protein	Chr2	6287200	6292799	621.43
AT2G14700	hypothetical protein	Chr2	6293200	6297399	777.437
AT2G14710	F-box family protein	Chr2	6298000	6299999	427.645
AT2G14760	basic helix-loop-helix (bHLH) DNA-binding superfamily protein	Chr2	6320000	6323799	1169.19
AT2G14920	SULFOTRANSFERASE 4A (ST4A)	Chr2	6418200	6419399	265.264
AT2G15010	Plant thionin	Chr2	6483000	6485199	221.951
AT2G15020	hypothetical protein	Chr2	6490000	6494799	1050.23
AT2G15080	RECEPTOR LIKE PROTEIN 19 (RLP19)	Chr2	6533800	6538599	608.862
AT2G15325	Bifunctional inhibitor/lipid-transfer protein/seed storage 2S albumin superfamily protein	Chr2	6669800	6676199	1466.53
AT2G15327	hypothetical protein	Chr2	6669800	6676199	1466.53
AT2G15610	hypothetical protein (DUF1685)	Chr2	6804800	6806599	907.091
AT2G15770	Cupredoxin superfamily protein	Chr2	6871000	6874799	1377.67
AT2G15780	Cupredoxin superfamily protein	Chr2	6871000	6874799	1377.67	6.31868
AT2G15840		Chr2	6897200	6901399	1070.04
AT2G16005	INTERACTOR OF SYNAPTOTAGMIN1; ROSY1	Chr2	6958000	6960799	331.973
AT2G16120	POLYOL/MONOSACCHARIDE TRANSPORTER 1 (PMT1)	Chr2	6996600	6998399	302.575
AT2G16130	POLYOL/MONOSACCHARIDE TRANSPORTER 2 (PMT2)	Chr2	6999800	7004399	1073.26
AT2G16190	hypothetical protein	Chr2	7019200	7022199	1496.22
AT2G16220	F-box and associated interaction domains-containing protein	Chr2	7030200	7038799	2142.8
AT2G16225	EMBRYO SURROUNDING FACTOR-like protein	Chr2	7030200	7038799	2142.8
AT2G16230	O-Glycosyl hydrolases family 17 protein	Chr2	7030200	7038799	2142.8
AT2G16290	F-box SKIP23-like protein (DUF295)	Chr2	7058600	7063399	1056.82
AT2G16300	F-box family protein	Chr2	7058600	7063399	1056.82
AT2G16310		Chr2	7064200	7067599	236.123
AT2G16365	F-box family protein	Chr2	7077600	7079999	263.546	5.08082
AT2G16367		Chr2	7077600	7079999	263.546
AT2G16586	transmembrane protein	Chr2	7190800	7191599	1704.84	404.49
AT2G16835	Aquaporin-like superfamily protein	Chr2	7295200	7297999	243.743
AT2G16850	PLASMA MEMBRANE INTRINSIC PROTEIN 2;8 (PIP2;8)	Chr2	7300400	7303199	706.65	3.95969
AT2G16890	UDP-Glycosyltransferase superfamily protein	Chr2	7314800	7321999	2486.76	1.26988
AT2G16895		Chr2	7314800	7321999	2486.76
AT2G16955		Chr2	7363000	7365999	217.551
AT2G16960	ARM repeat superfamily protein	Chr2	7364000	7365999	331.524
AT2G16970	MATERNAL EFFECT EMBRYO ARREST 15 (MEE15)	Chr2	7366400	7383599	2221.57
AT2G16980	Major facilitator superfamily protein	Chr2	7366400	7383599	2221.57
AT2G16990	Major facilitator superfamily protein	Chr2	7384200	7387999	193.125
AT2G17055	Toll-Interleukin-Resistance (TIR) domain family protein	Chr2	7417600	7418799	442.179
AT2G17060	Disease resistance protein (TIR-NBS-LRR class) family	Chr2	7420800	7427599	810.084
AT2G17070	hypothetical protein (DUF241)	Chr2	7431000	7437599	975.318
AT2G17080	hypothetical protein (DUF241)	Chr2	7431000	7437599	975.318
AT2G17090	SHORT SUSPENSOR (SSP)	Chr2	7431000	7437599	975.318
AT2G17470	ALUMINIUM ACTIVATED MALATE TRANSPORTER 6 (ALMT6)	Chr2	7584000	7586999	389.308
AT2G17477		Chr2	7587400	7590199	309.149
AT2G17680	DUF241 domain protein%2C putative (DUF241)	Chr2	7679000	7680199	328.373
AT2G17785	zinc-binding protein-like protein	Chr2	7727400	7730199	974.419
AT2G17950	WUSCHEL (WUS)	Chr2	7807600	7810999	1021.09
AT2G17960	hypothetical protein	Chr2	7811800	7814199	248.625
AT2G18050	HISTONE H1-3 (HIS1-3)	Chr2	7845600	7846799	200.715	28.7063
AT2G18060	VASCULAR RELATED NAC-DOMAIN PROTEIN 1 (VND1)	Chr2	7848400	7854799	840.082	14.667
AT2G18070	hypothetical protein	Chr2	7848400	7854799	840.082
AT2G18080	EMBRYO SAC DEVELOPMENT ARREST 2 (EDA2)	Chr2	7857000	7859599	448.722
AT2G18120	SHI-RELATED SEQUENCE 4 (SRS4)	Chr2	7876400	7878199	361.202	4.682
AT2G18150	Peroxidase superfamily protein	Chr2	7890800	7893799	467.852	4.61918
AT2G18340	late embryogenesis abundant domain-containing protein / LEA domain-containing protein	Chr2	7969200	7972199	2910.91
AT2G18350	HOMEOBOX PROTEIN 24 (HB24)	Chr2	7969200	7972199	2910.91
AT2G18380	GATA TRANSCRIPTION FACTOR 20 (GATA20)	Chr2	7982400	7984599	181.595
AT2G18480	Major facilitator superfamily protein	Chr2	8009200	8024399	4205.85
AT2G18490	C2H2-like zinc finger protein	Chr2	8009200	8024399	4205.85
AT2G18570	UDP-Glycosyltransferase superfamily protein	Chr2	8062800	8064999	668.994
AT2G18620	Terpenoid synthases superfamily protein	Chr2	8078200	8079399	725.465
AT2G18810	B3 domain protein (DUF313)	Chr2	8147200	8151599	352.726
AT2G18969	transcription factor/transcription regulator	Chr2	8229000	8231399	346.59
AT2G18970	hypothetical protein	Chr2	8229000	8231399	346.59
AT2G19010	GDSL-like Lipase/Acylhydrolase superfamily protein	Chr2	8243600	8246799	511.649
AT2G19020	RALF-LIKE 10 (RALFL10)	Chr2	8243600	8246799	511.649
AT2G19030	RALF-LIKE 11 (RALFL11)	Chr2	8247600	8262199	2184.01
AT2G19040	RALF-LIKE 12 (RALFL12)	Chr2	8247600	8262199	2184.01
AT2G19045	RALF-LIKE 13 (RALFL13)	Chr2	8247600	8262199	2184.01
AT2G19050	GDSL-like Lipase/Acylhydrolase superfamily protein	Chr2	8247600	8262199	2184.01
AT2G19060	SGNH hydrolase-type esterase superfamily protein	Chr2	8247600	8262199	2184.01
AT2G19070	SPERMIDINE HYDROXYCINNAMOYL TRANSFERASE (SHT)	Chr2	8247600	8262199	2184.01
AT2G19220	Myb/SANT-like DNA-binding domain protein	Chr2	8340400	8342799	368.949
AT2G19420	hypothetical protein	Chr2	8411400	8414199	200.985
AT2G19425	MICRORNA156G (MIR156G)	Chr2	8411400	8414199	200.985
AT2G19500	CYTOKININ OXIDASE 2 (CKX2)	Chr2	8446400	8449199	997.754
AT2G19630	F-box and associated interaction domains-containing protein	Chr2	8490000	8491199	222.958
AT2G19770	PROFILIN 5 (PRF5)	Chr2	8519600	8521599	350.268
AT2G19890	hypothetical protein	Chr2	8586800	8591199	567.196
AT2G19893	Defensin-like (DEFL) family protein	Chr2	8586800	8591199	567.196
AT2G20070	defensin-like protein	Chr2	8662200	8665399	469.839
AT2G20080	hypothetical protein	Chr2	8662200	8665399	469.839
AT2G20100	basic helix-loop-helix (bHLH) DNA-binding superfamily protein	Chr2	8677800	8680599	332.484	2.54855
AT2G20150	hypothetical protein	Chr2	8698200	8700799	230.846
AT2G20160	MEIDOS (MEO)	Chr2	8698200	8700799	230.846
AT2G20350	Integrase-type DNA-binding superfamily protein	Chr2	8784000	8785599	626.666
AT2G20430	ROP-INTERACTIVE CRIB MOTIF-CONTAINING PROTEIN 6 (RIC6)	Chr2	8808600	8810199	201.02
AT2G20520	FASCICLIN-LIKE ARABINOGALACTAN 6 (FLA6)	Chr2	8840400	8841599	568.355
AT2G20570	GBF'S PRO-RICH REGION-INTERACTING FACTOR 1 (GPRI1)	Chr2	8853400	8858799	1661.4
AT2G20619	Plant thionin family protein	Chr2	8891200	8893999	192.435
AT2G20620	hypothetical protein (DUF626)	Chr2	8891800	8893399	355.181
AT2G20993		Chr2	9018400	9024199	1804.68
AT2G21010	Calcium-dependent lipid-binding (CaLB domain) family protein	Chr2	9018400	9024199	1804.68
AT2G21020		Chr2	9018400	9024199	1804.68
AT2G21030	BREVIS RADIX-like protein	Chr2	9024600	9027399	537.766	1.381
AT2G21040	Calcium-dependent lipid-binding (CaLB domain) family protein	Chr2	9024600	9027399	537.766
AT2G21100	Disease resistance-responsive (dirigent-like protein) family protein	Chr2	9047800	9050999	300.587
AT2G21110	Disease resistance-responsive (dirigent-like protein) family protein	Chr2	9047800	9050999	300.587
AT2G21140	PROLINE-RICH PROTEIN 2 (PRP2)	Chr2	9060200	9062399	908.197
AT2G21220	SAUR-like auxin-responsive protein family	Chr2	9089000	9091399	537.374
AT2G21235	Basic-leucine zipper (bZIP) transcription factor family protein	Chr2	9097600	9098999	682.905
AT2G21330	FRUCTOSE-BISPHOSPHATE ALDOLASE 1 (FBA1)	Chr2	9128400	9130799	525.06
AT2G21610	PECTINESTERASE 11 (PE11)	Chr2	9245200	9247199	394.174
AT2G21720	ArgH (DUF639)	Chr2	9273600	9276999	346.112
AT2G21727	ECA1 gametogenesis family protein (DUF784)	Chr2	9278400	9281199	286.039
AT2G21730	CINNAMYL ALCOHOL DEHYDROGENASE HOMOLOG 2 (CAD2)	Chr2	9278400	9281199	286.039
AT2G21890	CINNAMYL ALCOHOL DEHYDROGENASE HOMOLOG 3 (CAD3)	Chr2	9327600	9332199	565.649
AT2G21900	WRKY DNA-BINDING PROTEIN 59 (WRKY59)	Chr2	9333800	9336999	993.963	3.02883
AT2G21920	F-box associated ubiquitination effector family protein	Chr2	9345800	9348999	616.846
AT2G21930	F-box associated ubiquitination effector family protein	Chr2	9345800	9348999	616.846
AT2G21980	HAUS augmin-like complex subunit	Chr2	9358200	9361199	611.835
AT2G21990	MIZU-KUSSEI-like protein (Protein of unknown function%2C DUF617)	Chr2	9358200	9361199	611.835
AT2G22030	Galactose oxidase/kelch repeat superfamily protein	Chr2	9371200	9382999	4825.52
AT2G22040	LETHAL WITH SEC THIRTEEN 8-2 (LST8-2)	Chr2	9371200	9382999	4825.52
AT2G22050	Galactose oxidase/kelch repeat superfamily protein	Chr2	9371200	9382999	4825.52
AT2G22055	RALF-LIKE 15 (RALFL15)	Chr2	9371200	9382999	4825.52
AT2G22060	galactose oxidase/kelch repeat protein	Chr2	9371200	9382999	4825.52
AT2G22145	ECA1 gametogenesis related family protein	Chr2	9420000	9431199	2869.66
AT2G22150		Chr2	9420000	9431199	2869.66
AT2G22155	ECA1 gametogenesis family protein	Chr2	9420000	9431199	2869.66
AT2G22160	Cysteine proteinases superfamily protein	Chr2	9420000	9431199	2869.66
AT2G22170	PLAT DOMAIN PROTEIN 2 (PLAT2)	Chr2	9420000	9431199	2869.66	3.00057
AT2G22180	hydroxyproline-rich glycoprotein family protein	Chr2	9420000	9431199	2869.66
AT2G22190	TREHALOSE-6-PHOSPHATE PHOSPHATASE E (TPPE)	Chr2	9435400	9441799	285.064
AT2G22330	"CYTOCHROME P450, FAMILY 79, SUBFAMILY B, POLYPEPTIDE 3" (CYP79B3)	Chr2	9488000	9489999	1926.12	2.16822
AT2G22335		Chr2	9490400	9494199	1422.84
AT2G22340	transmembrane protein	Chr2	9490400	9494199	1422.84
AT2G22510	hydroxyproline-rich glycoprotein family protein	Chr2	9569000	9570399	210.634	2.01069
AT2G22540	SHORT VEGETATIVE PHASE (SVP)	Chr2	9579000	9583999	841.856	2.87795
AT2G22590	UDP-Glycosyltransferase superfamily protein	Chr2	9591800	9593599	262.488
AT2G22630	AGAMOUS-LIKE 17 (AGL17)	Chr2	9616800	9621999	1045.83
AT2G22750	basic helix-loop-helix (bHLH) DNA-binding superfamily protein	Chr2	9669600	9674199	1500.57
AT2G22760	basic helix-loop-helix (bHLH) DNA-binding superfamily protein	Chr2	9677800	9679399	726.763
AT2G22800	(HAT9)	Chr2	9702000	9706199	1587.91
AT2G22805	Defensin-like (DEFL) family protein	Chr2	9710600	9712599	271.472
AT2G22810	1-AMINOCYCLOPROPANE-1-CARBOXYLATE SYNTHASE 4 (ACS4)	Chr2	9717600	9719599	473.93
AT2G22980	SERINE CARBOXYPEPTIDASE-LIKE 13 (SCPL13)	Chr2	9777800	9780199	182.681
AT2G23130	ARABINOGALACTAN PROTEIN 17 (AGP17)	Chr2	9844200	9845199	875.548
AT2G23210	UDP-Glycosyltransferase superfamily protein	Chr2	9882400	9883599	209.401
AT2G23220	"CYTOCHROME P450, FAMILY 81, SUBFAMILY D, POLYPEPTIDE 6" (CYP81D6)	Chr2	9884000	9891199	1947.06
AT2G23230	Terpenoid cyclases/Protein prenyltransferases superfamily protein	Chr2	9892400	9899399	1072.66
AT2G23240	ARABIDOPSIS THALIANA METALLOTHIONEIN 4B (ATMT4B)	Chr2	9892400	9899399	1072.66
AT2G23250	UDP-GLUCOSYL TRANSFERASE 84B2 (UGT84B2)	Chr2	9892400	9899399	1072.66
AT2G23260	UDP-GLUCOSYL TRANSFERASE 84B1 (UGT84B1)	Chr2	9899800	9901399	281.293
AT2G23410	CIS-PRENYLTRANSFERASE (CPT)	Chr2	9965800	9970799	433.324
AT2G23510	SPERMIDINE DISINAPOYL ACYLTRANSFERASE (SDT)	Chr2	10011600	10013599	254.13
AT2G23540	GDSL-like Lipase/Acylhydrolase superfamily protein	Chr2	10024200	10025799	208.025
AT2G23580	METHYL ESTERASE 4 (MES4)	Chr2	10033400	10036199	199.997
AT2G23590	METHYL ESTERASE 8 (MES8)	Chr2	10033400	10036199	199.997
AT2G23760	BEL1-LIKE HOMEODOMAIN 4 (BLH4)	Chr2	10105800	10113199	2929.22
AT2G23800	GERANYLGERANYL PYROPHOSPHATE SYNTHASE 2 (GGPS2)	Chr2	10131600	10133199	545.639
AT2G23840	HNH endonuclease	Chr2	10152400	10155599	231.119
AT2G23850		Chr2	10156200	10158599	306.839
AT2G23860		Chr2	10156200	10158599	306.839
AT2G23870		Chr2	10163000	10166399	848.125
AT2G23960	Class I glutamine amidotransferase-like superfamily protein	Chr2	10195800	10197799	208.35
AT2G24000	SERINE CARBOXYPEPTIDASE-LIKE 22 (scpl22)	Chr2	10212200	10214199	283.199
AT2G24080	F-box protein (DUF295)	Chr2	10236800	10239399	881.413
AT2G24205	ECA1 gametogenesis related family protein	Chr2	10291200	10299799	2133.39
AT2G24210	TERPENE SYNTHASE 10 (TPS10)	Chr2	10291200	10299799	2133.39
AT2G24430	NAC DOMAIN CONTAINING PROTEIN 38 (NAC038)	Chr2	10384200	10390599	717.462	1.19575
AT2G24510	F-box associated ubiquitination effector family protein	Chr2	10403000	10408199	934.144
AT2G24513		Chr2	10403200	10408999	256.038
AT2G24580	FAD-dependent oxidoreductase family protein	Chr2	10445200	10446599	461.202
AT2G24617	hypothetical protein	Chr2	10462800	10464199	367.676
AT2G24620	S-locus glycoprotein family protein	Chr2	10462800	10464199	367.676
AT2G24696	transcriptional factor B3 family protein	Chr2	10509000	10511999	544.991
AT2G24735		Chr2	10528000	10531999	910.782
AT2G24740	SET DOMAIN GROUP 21 (SDG21)	Chr2	10528000	10531999	910.782
AT2G24762	GLUTAMINE DUMPER 4 (GDU4)	Chr2	10558200	10560399	484.896	13.7353
AT2G24810	Pathogenesis-related thaumatin superfamily protein	Chr2	10573800	10574799	364.319
AT2G24850	TYROSINE AMINOTRANSFERASE 3 (TAT3)	Chr2	10583600	10585399	459.233	2.76719
AT2G25090	CBL-INTERACTING PROTEIN KINASE 16 (CIPK16)	Chr2	10670600	10672999	752.185
AT2G25095	MICRORNA156A (MIR156A)	Chr2	10673600	10678799	1664.89
AT2G25120	Bromo-adjacent homology (BAH) domain-containing protein	Chr2	10688800	10694799	522.931
AT2G25150	HXXXD-type acyl-transferase family protein	Chr2	10702400	10704999	840.519
AT2G25160	"CYTOCHROME P450, FAMILY 82, SUBFAMILY F, POLYPEPTIDE 1" (CYP82F1)	Chr2	10709400	10711399	204.794
AT2G25330	TRAF-like family protein	Chr2	10789200	10794599	1252.35	1.03174
AT2G25340	VESICLE-ASSOCIATED MEMBRANE PROTEIN 712 (VAMP712)	Chr2	10789200	10794599	1252.35
AT2G25360	RING/U-box superfamily protein	Chr2	10804000	10805999	318.808
AT2G25370	RING/U-box superfamily protein	Chr2	10806600	10811999	812.798
AT2G25380		Chr2	10806600	10811999	812.798
AT2G25440	RECEPTOR LIKE PROTEIN 20 (RLP20)	Chr2	10826800	10831799	1014.4
AT2G25450	2-oxoglutarate (2OG) and Fe(II)-dependent oxygenase superfamily protein	Chr2	10826800	10831799	1014.4	177.006
AT2G25630	BETA GLUCOSIDASE 14 (BGLU14)	Chr2	10908400	10909999	353.621	1.33869
AT2G25697		Chr2	10945800	10952199	1831.75
AT2G25700	SKP1-LIKE 3 (SK3)	Chr2	10945800	10952199	1831.75
AT2G25810	TONOPLAST INTRINSIC PROTEIN 4;1 (TIP4;1)	Chr2	11012400	11016799	872.598
AT2G25820	ETHYLENE AND SALT INDUCIBLE 2 (ESE2)	Chr2	11012400	11016799	872.598
AT2G25890	Oleosin family protein	Chr2	11037200	11039199	1208.66
AT2G25980	Mannose-binding lectin superfamily protein	Chr2	11077600	11078999	186.301	5.40712
AT2G26010	PLANT DEFENSIN 1.3 (PDF1.3)	Chr2	11086200	11089799	554.93
AT2G26020	PLANT DEFENSIN 1.2B (PDF1.2b)	Chr2	11086200	11089799	554.93
AT2G26160	F-box SKIP23-like protein (DUF295)	Chr2	11138200	11139799	333.785
AT2G26250	3-KETOACYL-COA SYNTHASE 10 (KCS10)	Chr2	11170800	11173199	331.405	23.8002
AT2G26580	YABBY5 (YAB5)	Chr2	11302800	11310199	3986.06
AT2G26690	Major facilitator superfamily protein	Chr2	11347600	11349599	188.15	1.68147
AT2G26695	Ran BP2/NZF zinc finger-like superfamily protein	Chr2	11364600	11365999	239.618
AT2G26700	PINOID2 (PID2)	Chr2	11368000	11371199	1083.03
AT2G26850	F-box family protein	Chr2	11449400	11451999	548.933
AT2G26870	NON-SPECIFIC PHOSPHOLIPASE C2 (NPC2)	Chr2	11457000	11459399	447.327
AT2G26880	AGAMOUS-LIKE 41 (AGL41)	Chr2	11459800	11461199	337.204
AT2G26882		Chr2	11459800	11461199	337.204
AT2G26940	C2H2-type zinc finger family protein	Chr2	11496200	11498399	269.291
AT2G27070	RESPONSE REGULATOR 13 (RR13)	Chr2	11556600	11559399	205.427
AT2G27240	aluminum activated malate transporter family protein	Chr2	11655600	11660999	1281.94
AT2G27250	CLAVATA3 (CLV3)	Chr2	11664600	11665999	380.33
AT2G27360	GDSL-like Lipase/Acylhydrolase superfamily protein	Chr2	11707400	11710199	1184.12
AT2G27370	CASPARIAN STRIP MEMBRANE DOMAIN PROTEIN 3 (CASP3)	Chr2	11707400	11710199	1184.12
AT2G27550	CENTRORADIALIS (ATC)	Chr2	11773000	11774999	655.159
AT2G27560		Chr2	11773000	11774999	655.159
AT2G27660	Cysteine/Histidine-rich C1 domain family protein	Chr2	11799600	11800999	232.231	1.06039
AT2G27880	ARGONAUTE 5 (AGO5)	Chr2	11871200	11872799	394.219
AT2G27936		Chr2	11896400	11898799	411.907
AT2G27940	RING/U-box superfamily protein	Chr2	11896400	11898799	411.907
AT2G27990	BEL1-LIKE HOMEODOMAIN 8 (BLH8)	Chr2	11920800	11925799	652.836
AT2G28010	Eukaryotic aspartyl protease family protein	Chr2	11930000	11932399	337.285
AT2G28020	mediator of RNA polymerase II transcription subunit	Chr2	11932800	11935599	317.223
AT2G28030	Eukaryotic aspartyl protease family protein	Chr2	11932800	11935599	317.223
AT2G28056	MICRORNA172A (MIR172A)	Chr2	11940600	11945399	769.172
AT2G28085	SAUR42; SMALL AUXIN UPREGULATED RNA 42	Chr2	11965400	11969799	574.14
AT2G28170	(ATCHX7)	Chr2	12008200	12010199	331.867
AT2G28180	(ATCHX8)	Chr2	12010800	12013999	465.037
AT2G28220	aspartic proteinase CDR1-like protein	Chr2	12033800	12037199	656.535
AT2G28340	GATA TRANSCRIPTION FACTOR 13 (GATA13)	Chr2	12101400	12106399	1362.84
AT2G28490	RmlC-like cupins superfamily protein	Chr2	12178800	12181999	386.251
AT2G28610	PRESSED FLOWER (PRS)	Chr2	12256000	12263799	1764.25
AT2G28630	3-KETOACYL-COA SYNTHASE 12 (KCS12)	Chr2	12275600	12277199	707.903	7.26502
AT2G28680	RmlC-like cupins superfamily protein	Chr2	12303400	12305399	288.697
AT2G28780	P-hydroxybenzoic acid efflux pump subunit	Chr2	12340000	12343599	2467.59
AT2G28790	Pathogenesis-related thaumatin superfamily protein	Chr2	12354400	12355599	573.153	68.5663
AT2G28810	Dof-type zinc finger DNA-binding family protein	Chr2	12359600	12366799	2293.28	1.85154
AT2G28850	CYTOCHROME P450, FAMILY 710, SUBFAMILY A, POLYPEPTIDE 3 (CYP710A3)	Chr2	12382600	12384999	433.922
AT2G28860	CYTOCHROME P450, FAMILY 710, SUBFAMILY A, POLYPEPTIDE 4 (CYP710A4)	Chr2	12388000	12389799	676.293
AT2G28870	cyclin-dependent kinase inhibitor SMR1-like protein	Chr2	12392800	12394999	293.976	3.24863
AT2G28960	Leucine-rich repeat protein kinase family protein	Chr2	12437800	12448399	1240.21
AT2G28970	Leucine-rich repeat protein kinase family protein	Chr2	12437800	12448399	1240.21
AT2G28990	Leucine-rich repeat protein kinase family protein	Chr2	12453200	12464999	1787.29
AT2G29000	Leucine-rich repeat protein kinase family protein	Chr2	12453200	12464999	1787.29
AT2G29090	"CYTOCHROME P450, FAMILY 707, SUBFAMILY A, POLYPEPTIDE 2" (CYP707A2)	Chr2	12493800	12499399	953.093
AT2G29360	NAD(P)-binding Rossmann-fold superfamily protein	Chr2	12604400	12607399	184.396
AT2G29370	NAD(P)-binding Rossmann-fold superfamily protein	Chr2	12604400	12607399	184.396
AT2G29380	HIGHLY ABA-INDUCED PP2C GENE 3 (HAI3)	Chr2	12608600	12609999	244.709
AT2G29780	Galactose oxidase/kelch repeat superfamily protein	Chr2	12718000	12719599	364.523
AT2G29800	Galactose oxidase/kelch repeat superfamily protein	Chr2	12723000	12729799	2593.17
AT2G29810	Galactose oxidase/kelch repeat superfamily protein	Chr2	12723000	12729799	2593.17
AT2G29820	Galactose oxidase/kelch repeat superfamily protein	Chr2	12723000	12729799	2593.17
AT2G29830	Galactose oxidase/kelch repeat superfamily protein	Chr2	12730400	12734799	414.83
AT2G29840	RING/U-box superfamily protein	Chr2	12730400	12734799	414.83
AT2G29860	Galactose oxidase/kelch repeat superfamily protein	Chr2	12737200	12738799	403.985
AT2G30130	(ASL5)	Chr2	12868600	12869999	296.328	3.31332
AT2G30220	GDSL-like Lipase/Acylhydrolase family protein	Chr2	12891200	12892799	241.896
AT2G30300	Major facilitator superfamily protein	Chr2	12919200	12921599	799.731
AT2G30340	LOB DOMAIN-CONTAINING PROTEIN 13 (LBD13)	Chr2	12931000	12932599	273.283	4.02303
AT2G30370	CHALLAH (CHAL)	Chr2	12940200	12945599	1674.23
AT2G30650	ATP-dependent caseinolytic (Clp) protease/crotonase family protein	Chr2	13053200	13057199	388.462
AT2G30660	ATP-dependent caseinolytic (Clp) protease/crotonase family protein	Chr2	13057600	13061799	893.719	4.64426
AT2G30670	NAD(P)-binding Rossmann-fold superfamily protein	Chr2	13068600	13071199	209.83	43.3002
AT2G30680	callose synthase-like protein	Chr2	13073400	13075599	660.933
AT2G30750	CYTOCHROME P450, FAMILY 71, SUBFAMILY A, POLYPEPTIDE 12 (CYP71A12)	Chr2	13099400	13101599	1070.93	2.04001
AT2G30760	hypothetical protein	Chr2	13107400	13112199	1620.06
AT2G30766	hypothetical protein	Chr2	13107400	13112199	1620.06
AT2G30770	CYTOCHROME P450, FAMILY 71, SUBFAMILY A, POLYPEPTIDE 13 (CYP71A13)	Chr2	13107400	13112199	1620.06	2.49177
AT2G30830	2-oxoglutarate (2OG) and Fe(II)-dependent oxygenase superfamily protein	Chr2	13132600	13135599	208.054
AT2G30900	TRICHOME BIREFRINGENCE-LIKE 43 (TBL43)	Chr2	13150400	13152599	221.075
AT2G31070	TCP DOMAIN PROTEIN 10 (tcp10)	Chr2	13220400	13222399	596.257
AT2G31081	CLAVATA3/ESR-RELATED 4 (CLE4)	Chr2	13235400	13245199	1907.82
AT2G31082	CLAVATA3/ESR-RELATED 7 (CLE7)	Chr2	13235400	13245199	1907.82
AT2G31083	CLAVATA3/ESR-RELATED 5 (CLE5)	Chr2	13249200	13255199	997.406
AT2G31085	CLAVATA3/ESR-RELATED 6 (CLE6)	Chr2	13249200	13255199	997.406
AT2G31215	basic helix-loop-helix (bHLH) DNA-binding superfamily protein	Chr2	13298600	13301799	347.913
AT2G31230	ETHYLENE-RESPONSIVE ELEMENT BINDING FACTOR 15 (ERF15)	Chr2	13306200	13307399	245.712	1.91469
AT2G31460	B3 domain protein%2C putative (DUF313)	Chr2	13404600	13410199	677.969
AT2G31470	DROUGHT TOLERANCE REPRESSOR (DOR)	Chr2	13404600	13410199	677.969	1.50686
AT2G31480	hypothetical protein	Chr2	13404600	13410199	677.969
AT2G31690	DAD1-LIKE LIPASE 5; DALL5	Chr2	13475800	13478599	1075.62
AT2G31760	ARIADNE 10 (ARI10)	Chr2	13508200	13513799	1402.22
AT2G31770	ARIADNE 9 (ARI9)	Chr2	13508200	13513799	1402.22
AT2G31780	ARIADNE 11 (ARI11)	Chr2	13514800	13517199	1090.75
AT2G31930	hypothetical protein	Chr2	13577400	13579399	267.459
AT2G32270	ZINC TRANSPORTER 3 PRECURSOR (ZIP3)	Chr2	13704000	13705199	337.584	1.23213
AT2G32273	MICRORNA417 (MIR417)	Chr2	13707200	13711599	1034.85
AT2G32275	Expressed protein	Chr2	13707200	13711599	1034.85
AT2G32370	HOMEODOMAIN GLABROUS 3 (HDG3)	Chr2	13739800	13744599	1387.84
AT2G32460	MYB DOMAIN PROTEIN 101 (MYB101)	Chr2	13781800	13784599	746.746	2.44777
AT2G32530	CELLULOSE SYNTHASE-LIKE B3 (CSLB03)	Chr2	13809000	13813399	308.278
AT2G32610	CELLULOSE SYNTHASE-LIKE B1 (CSLB01)	Chr2	13837600	13844199	709.788	3.91829
AT2G32620	CELLULOSE SYNTHASE-LIKE B (CSLB02)	Chr2	13837600	13844199	709.788	1.41304
AT2G32690	GLYCINE-RICH PROTEIN 23 (GRP23)	Chr2	13863800	13864999	711.843	2.28068
AT2G32830	PHOSPHATE TRANSPORTER 1;5 (PHT1;5)	Chr2	13928000	13929799	770.273
AT2G32860	BETA GLUCOSIDASE 33 (BGLU33)	Chr2	13939200	13944399	540.071
AT2G32870	TRAF-like family protein	Chr2	13944800	13947799	301.947
AT2G32880	TRAF-like family protein	Chr2	13948400	13953599	1035.08
AT2G32885	Rapid alkalinization factor (RALF) family protein	Chr2	13948400	13953599	1035.08
AT2G32890	RALF-LIKE 17 (RALFL17)	Chr2	13948400	13953599	1035.08
AT2G32960	PLANT AND FUNGI ATYPICAL DUAL-SPECI&#64257;CITY PHOSPHATASE 2 (PFA-DSP2)	Chr2	13987000	13989399	426.362	2.22558
AT2G33070	NITRILE SPECIFIER PROTEIN 2 (NSP2)	Chr2	14029200	14031199	1065.29
AT2G33160		Chr2	14052800	14055199	731.679	1.12208
AT2G33380	RESPONSIVE TO DESSICATION 20 (RD20)	Chr2	14145200	14150199	545.207
AT2G33385	ACTIN-RELATED PROTEIN C2B (arpc2b)	Chr2	14145200	14150199	545.207
AT2G33775	RALF-LIKE 19 (RALFL19)	Chr2	14286800	14291799	1126.31
AT2G33780	VQ motif-containing protein	Chr2	14286800	14291799	1126.31
AT2G33790	ARABINOGALACTAN PROTEIN 30 (AGP30)	Chr2	14292400	14295399	671.43
AT2G33850	E6-like protein	Chr2	14320800	14322199	704.746
AT2G33870	RAB GTPASE HOMOLOG A1H (ArRABA1h)	Chr2	14337200	14340199	480.01
AT2G33880	HOMEOBOX-3 (HB-3)	Chr2	14341200	14349199	2076.71
AT2G34100	nonsense-mediated mRNA decay-like protein	Chr2	14399400	14403599	631.37
AT2G34110	hypothetical protein	Chr2	14399400	14403599	631.37
AT2G34315	avirulence induced family protein	Chr2	14480400	14483199	203.419
AT2G34350	Nodulin-like / Major Facilitator Superfamily protein	Chr2	14493600	14495599	552.122	1.05281
AT2G34360	MATE efflux family protein	Chr2	14508200	14511599	437.9
AT2G34370	Pentatricopeptide repeat (PPR) superfamily protein	Chr2	14508200	14511599	437.9
AT2G34490	CYTOCHROME P450, FAMILY 710, SUBFAMILY A, POLYPEPTIDE 2 (CYP710A2)	Chr2	14535800	14537399	410.805
AT2G34540	hypothetical protein	Chr2	14550600	14551799	185.474
AT2G34610	cotton fiber protein	Chr2	14575200	14576399	200.461
AT2G34700	Pollen Ole e 1 allergen and extensin family protein	Chr2	14633600	14635799	369.572
AT2G34790	MATERNAL EFFECT EMBRYO ARREST 23 (MEE23)	Chr2	14676200	14677399	523.245	3.64723
AT2G34810	FAD-binding Berberine family protein	Chr2	14685200	14686599	235.296
AT2G34820	basic helix-loop-helix (bHLH) DNA-binding superfamily protein	Chr2	14689200	14691799	482.065
AT2G34825	RALF-LIKE 20 (RALFL20)	Chr2	14689200	14691799	482.065
AT2G34830	WRKY DNA-BINDING PROTEIN 35 (WRKY35)	Chr2	14693600	14696799	2094.5
AT2G34870	MATERNAL EFFECT EMBRYO ARREST 26 (MEE26)	Chr2	14710600	14713599	210.164
AT2G34880	MATERNAL EFFECT EMBRYO ARREST 27 (MEE27)	Chr2	14710600	14713599	210.164
AT2G35070	transmembrane protein	Chr2	14780800	14785799	1532.62
AT2G35290	hypothetical protein	Chr2	14861600	14864199	799.715
AT2G35300	LATE EMBRYOGENESIS ABUNDANT 18 (LEA18)	Chr2	14861600	14864199	799.715
AT2G35570		Chr2	14932000	14936799	1838.03
AT2G35580	Serine protease inhibitor (SERPIN) family protein	Chr2	14932000	14936799	1838.03
AT2G35585	cystic fibrosis transmembrane conductance regulator	Chr2	14937200	14939999	240.209
AT2G35590		Chr2	14937200	14939999	240.209	1.88999
AT2G35612	copper amine oxidase family protein	Chr2	14955000	14957199	401.317
AT2G35637		Chr2	14982600	14985399	1467.99
AT2G35640	Homeodomain-like superfamily protein	Chr2	14982600	14985399	1467.99
AT2G35820	ureidoglycolate hydrolase	Chr2	15050800	15053399	524.79
AT2G35830	ureidoglycolate hydrolase	Chr2	15050800	15053399	524.79	1.35511
AT2G35970	Late embryogenesis abundant (LEA) hydroxyproline-rich glycoprotein family	Chr2	15108600	15109799	446.085
AT2G35980	YELLOW-LEAF-SPECIFIC GENE 9 (YLS9)	Chr2	15110400	15111999	249.424	3.99772
AT2G36026	Ovate family protein	Chr2	15127000	15128199	550.681
AT2G36030	hypothetical protein	Chr2	15127000	15128199	550.681
AT2G36050	OVATE FAMILY PROTEIN 15 (OFP15)	Chr2	15135600	15136799	426.579
AT2G36110	Polynucleotidyl transferase%2C ribonuclease H-like superfamily protein	Chr2	15161600	15162799	536.697
AT2G36120	DEFECTIVELY ORGANIZED TRIBUTARIES 1 (DOT1)	Chr2	15164000	15166399	1801.99	4.13298
AT2G36440	hypothetical protein	Chr2	15292400	15295999	1434.26
AT2G36450	HARDY (HRD)	Chr2	15292400	15295999	1434.26
AT2G36560	AT hook motif DNA-binding family protein	Chr2	15329000	15332799	1518.03
AT2G36640	EMBRYONIC CELL PROTEIN 63 (ECP63)	Chr2	15357200	15358999	565.618
AT2G36690	2-oxoglutarate (2OG) and Fe(II)-dependent oxygenase superfamily protein	Chr2	15379600	15382199	793.549
AT2G36780	UDP-Glycosyltransferase superfamily protein	Chr2	15417600	15419199	258.075
AT2G36970	UDP-Glycosyltransferase superfamily protein	Chr2	15528800	15529799	218.813
AT2G37010	NON-INTRINSIC ABC PROTEIN 12 (NAP12)	Chr2	15543200	15545999	243.793
AT2G37040	PHE AMMONIA LYASE 1 (pal1)	Chr2	15559600	15560399	381.826	128.096
AT2G37390	SODIUM POTASSIUM ROOT DEFECTIVE 2 (NAKR2)	Chr2	15693400	15694999	377.292
AT2G37435	Cystatin/monellin superfamily protein	Chr2	15709600	15714999	1171.88
AT2G37440	DNAse I-like superfamily protein	Chr2	15720000	15721599	761.393
AT2G37590	DNA BINDING WITH ONE FINGER 2.4 (DOF2.4)	Chr2	15769000	15770799	608.674	2.6387
AT2G37720	TRICHOME BIREFRINGENCE-LIKE 15 (TBL15)	Chr2	15820600	15829199	3217.94
AT2G37730	glycosyltransferase (DUF604)	Chr2	15820600	15829199	3217.94
AT2G37740	ZINC-FINGER PROTEIN 10 (ZFP10)	Chr2	15820600	15829199	3217.94
AT2G37800	cysteine/histidine-rich C1 domain protein	Chr2	15841000	15843999	897.286
AT2G37810	Cysteine/Histidine-rich C1 domain family protein	Chr2	15845200	15846199	410.346
AT2G38080	IRREGULAR XYLEM 12 (IRX12)	Chr2	15936000	15937399	246.225	1.36054
AT2G38110	GLYCEROL-3-PHOSPHATE ACYLTRANSFERASE 6 (GPAT6)	Chr2	15952600	15955599	2496.05	1.89354
AT2G38240	2-oxoglutarate (2OG) and Fe(II)-dependent oxygenase superfamily protein	Chr2	16013000	16014999	1267.33	10.5287
AT2G38300	myb-like HTH transcriptional regulator family protein	Chr2	16044000	16047199	600.618
AT2G38380	Peroxidase superfamily protein	Chr2	16076200	16081599	1177.85	86.5809
AT2G38390	Peroxidase superfamily protein	Chr2	16076200	16081599	1177.85	15.1283
AT2G38510	MATE efflux family protein	Chr2	16123800	16125599	849.991
AT2G38540	LIPID TRANSFER PROTEIN 1 (LP1)	Chr2	16130200	16130999	197.564	120.679
AT2G38900	Serine protease inhibitor%2C potato inhibitor I-type family protein	Chr2	16243000	16244799	218.492
AT2G38905	Low temperature and salt responsive protein family	Chr2	16243000	16244799	218.492
AT2G38920	SPX (SYG1/Pho81/XPR1) domain-containing protein / zinc finger (C3HC4-type RING finger) protein-like protein	Chr2	16248200	16253799	1201.03
AT2G39010	PLASMA MEMBRANE INTRINSIC PROTEIN 2E (PIP2E)	Chr2	16290800	16294399	1287.24
AT2G39030	N-ACETYLTRANSFERASE ACTIVITY 1 (NATA1)	Chr2	16298000	16301599	2043.31
AT2G39040	Peroxidase superfamily protein	Chr2	16298000	16301599	2043.31
AT2G39060	(SWEET9)	Chr2	16306600	16308199	290.681
AT2G39175	MICRORNA160A (MIR160A)	Chr2	16337400	16341999	1276.07
AT2G39240	RNA polymerase I specific transcription initiation factor RRN3 protein	Chr2	16386800	16391199	1137.41
AT2G39250	SCHNARCHZAPFEN (SNZ)	Chr2	16386800	16391199	1137.41
AT2G39310	JACALIN-RELATED LECTIN 22 (JAL22)	Chr2	16414600	16416799	354.688	103.054
AT2G39510	nodulin MtN21 /EamA-like transporter family protein	Chr2	16491200	16494399	787.022
AT2G39530	Uncharacterized protein family (UPF0497)	Chr2	16498200	16499799	597.35
AT2G39830	DA1-RELATED PROTEIN 2 (DAR2)	Chr2	16620000	16624199	279.927
AT2G39850	Subtilisin-like serine endopeptidase family protein	Chr2	16632800	16634199	230.078
AT2G40050	Cysteine/Histidine-rich C1 domain family protein	Chr2	16724200	16725799	276.688
AT2G40170	LATE EMBRYOGENESIS ABUNDANT 6 (GEA6)	Chr2	16779600	16780599	276.993
AT2G40180	PHOSPHATASE 2C5 (PP2C5)	Chr2	16782400	16784799	285.297
AT2G40210	AGAMOUS-LIKE 48 (AGL48)	Chr2	16793200	16799199	2847.61
AT2G40220	ABA INSENSITIVE 4 (ABI4)	Chr2	16793200	16799199	2847.61
AT2G40260	Homeodomain-like superfamily protein	Chr2	16816600	16819599	554.451	2.21262
AT2G40330	PYR1-LIKE 6 (PYL6)	Chr2	16844000	16846199	1215.32	5.13791
AT2G40370	LACCASE 5 (LAC5)	Chr2	16857200	16860399	629.547
AT2G40435	transcription factor SCREAM-like protein	Chr2	16883000	16892999	1914.73
AT2G40440	BTB/POZ domain protein	Chr2	16883000	16892999	1914.73
AT2G40450	BTB/POZ domain-containing protein	Chr2	16883000	16892999	1914.73
AT2G40470	LOB DOMAIN-CONTAINING PROTEIN 15 (LBD15)	Chr2	16902400	16903799	325.323	3.4239
AT2G40500	Protein kinase superfamily protein	Chr2	16916200	16917999	539.831
AT2G40560	Protein kinase superfamily protein	Chr2	16938600	16939799	742.121
AT2G40610	EXPANSIN A8 (EXPA8)	Chr2	16948800	16950399	355.661	2.34004
AT2G40802		Chr2	17027600	17030599	296.199
AT2G40805	MICRORNA319C (MIR319C)	Chr2	17027600	17030599	296.199
AT2G40900	UMAMIT11; USUALLY MULTIPLE ACIDS MOVE IN AND OUT TRANSPORTERS 11	Chr2	17063200	17066199	680.766
AT2G40990	DHHC-type zinc finger family protein	Chr2	17106200	17108399	300.538
AT2G41260	(M17)	Chr2	17205600	17207999	4202.75
AT2G41270		Chr2	17208400	17211199	1129.31
AT2G41280	(M10)	Chr2	17208400	17211199	1129.31
AT2G41290	STRICTOSIDINE SYNTHASE-LIKE 2 (SSL2)	Chr2	17208400	17211199	1129.31
AT2G41360	galactose oxidase/kelch repeat protein	Chr2	17234200	17240599	2750
AT2G41370	BLADE ON PETIOLE2 (BOP2)	Chr2	17234200	17240599	2750
AT2G41390	Pollen Ole e 1 allergen and extensin family protein	Chr2	17257200	17260199	841.276
AT2G41391		Chr2	17257200	17260199	841.276
AT2G41400	Pollen Ole e 1 allergen and extensin family protein	Chr2	17257200	17260199	841.276
AT2G41445	agamous-like MADS-box protein	Chr2	17275800	17277599	296.077
AT2G41610	transmembrane protein	Chr2	17347200	17349199	397.523
AT2G41620	Nucleoporin interacting component (Nup93/Nic96-like) family protein	Chr2	17347200	17349199	397.523	11.4574
AT2G41850	POLYGALACTURONASE ABSCISSION ZONE A. THALIANA (PGAZAT)	Chr2	17462000	17464599	838.616	36.9852
AT2G41870	ATREM4.2; REM4.2; REMORIN GROUP 4 2	Chr2	17471800	17472999	361.431
AT2G41940	ZINC FINGER PROTEIN 8 (ZFP8)	Chr2	17503000	17508599	1568.07
AT2G41990	CC3; COMPANION OF CELLULOSE SYNTHASE 3	Chr2	17527200	17530399	198.661
AT2G42090	ACTIN 9 (ACT9)	Chr2	17556200	17558399	313.15
AT2G42100	Actin-like ATPase superfamily protein	Chr2	17559600	17562799	888.625
AT2G42110	hypothetical protein	Chr2	17559600	17562799	888.625	4.47429
AT2G42140	VQ motif-containing protein	Chr2	17568800	17569799	392.356
AT2G42170	Actin family protein	Chr2	17578200	17582199	834.272
AT2G42180	cotton fiber protein	Chr2	17578200	17582199	834.272
AT2G42380	(BZIP34)	Chr2	17647000	17648799	447.133
AT2G42440	ASYMMETRIC LEAVES 2-LIKE 15 (ASL15)	Chr2	17668600	17670399	579.491
AT2G42540	COLD-REGULATED 15A (COR15A)	Chr2	17710800	17712199	232.417
AT2G42610	LIGHT SENSITIVE HYPOCOTYLS 10 (LSH10)	Chr2	17746400	17751799	2005.47	3.15992
AT2G42820	HVA22-LIKE PROTEIN F (HVA22F)	Chr2	17817600	17823399	549.519
AT2G42830	SHATTERPROOF 2 (SHP2)	Chr2	17817600	17823399	549.519
AT2G42840	PROTODERMAL FACTOR 1 (PDF1)	Chr2	17826400	17827799	185.164	1.85756
AT2G42990	GDSL-like Lipase/Acylhydrolase superfamily protein	Chr2	17878600	17882399	226.661
AT2G43000	NAC DOMAIN CONTAINING PROTEIN 42 (NAC042)	Chr2	17878600	17882399	226.661	7.16085
AT2G43050	(ATPMEPCRD)	Chr2	17902400	17903399	372.384
AT2G43060	ILI1 BINDING BHLH 1 (IBH1)	Chr2	17909000	17909999	331.813	24.0326
AT2G43590	Chitinase family protein	Chr2	18081200	18082799	818.421	15.478
AT2G43600	Chitinase family protein	Chr2	18085800	18089399	963.64
AT2G43610	Chitinase family protein	Chr2	18085800	18089399	963.64	50.7045
AT2G43860	Pectin lyase-like superfamily protein	Chr2	18163000	18164599	314.186
AT2G43880	Pectin lyase-like superfamily protein	Chr2	18172400	18174599	769.082
AT2G43920	HARMLESS TO OZONE LAYER 2 (HOL2)	Chr2	18188600	18190799	440.338	10.2681
AT2G44030	Galactose oxidase/kelch repeat superfamily protein	Chr2	18219800	18221399	852.291
AT2G44240	NEP-interacting protein (DUF239)	Chr2	18290000	18292199	331.058
AT2G44330	RING/U-box superfamily protein	Chr2	18310400	18311999	387.106
AT2G44340	VQ motif-containing protein	Chr2	18314200	18315399	294.328
AT2G44370	Cysteine/Histidine-rich C1 domain family protein	Chr2	18322000	18322999	286.524	4.42614
AT2G44540	GLYCOSYL HYDROLASE 9B9 (GH9B9)	Chr2	18386200	18390999	1507.86
AT2G44550	GLYCOSYL HYDROLASE 9B10 (GH9B10)	Chr2	18386200	18390999	1507.86
AT2G44560	GLYCOSYL HYDROLASE 9B11 (GH9B11)	Chr2	18391800	18393399	211.066
AT2G44581	RING/U-box superfamily protein	Chr2	18397600	18398799	562.688
AT2G44745	WRKY DNA-BINDING PROTEIN 12 (WRKY12)	Chr2	18446000	18450799	855.03
AT2G44810	DEFECTIVE ANTHER DEHISCENCE 1 (DAD1)	Chr2	18479200	18480399	218.234
AT2G44910	HOMEOBOX-LEUCINE ZIPPER PROTEIN 4 (HB4)	Chr2	18517600	18519599	394.754
AT2G44920	Tetratricopeptide repeat (TPR)-like superfamily protein	Chr2	18525400	18531399	692.915
AT2G44925	hypothetical protein	Chr2	18525400	18531399	692.915
AT2G44930	transmembrane protein%2C putative (DUF247)	Chr2	18525400	18531399	692.915
AT2G44990	CAROTENOID CLEAVAGE DIOXYGENASE 7 (CCD7)	Chr2	18558600	18561599	759.103
AT2G45050	GATA TRANSCRIPTION FACTOR 2 (GATA2)	Chr2	18581200	18583999	769.861
AT2G45110	EXPANSIN B4 (EXPB4)	Chr2	18599200	18600799	180.206
AT2G45130	SPX DOMAIN GENE 3 (SPX3)	Chr2	18607200	18610599	1641.08
AT2G45135	RING/U-box superfamily protein	Chr2	18607200	18610599	1641.08
AT2G45190	ABNORMAL FLORAL ORGANS (AFO)	Chr2	18627600	18636799	3672.07
AT2G45220	ATPME17; PECTIN METHYLESTERASE 17; PME17	Chr2	18645400	18646599	963.449	25.1527
AT2G45430	AT-HOOK MOTIF NUCLEAR-LOCALIZED PROTEIN 22 (AHL22)	Chr2	18727600	18728999	561.403	14.4859
AT2G45550	"CYTOCHROME P450, FAMILY 76, SUBFAMILY C, POLYPEPTIDE 4" (CYP76C4)	Chr2	18773800	18778599	354.594
AT2G45560	"CYTOCHROME P450, FAMILY 76, SUBFAMILY C, POLYPEPTIDE 1" (CYP76C1)	Chr2	18776200	18778599	262.507
AT2G45600	alpha/beta-Hydrolases superfamily protein	Chr2	18789600	18790599	271.023
AT2G45650	AGAMOUS-LIKE 6 (AGL6)	Chr2	18803200	18806599	900.103
AT2G45660	AGAMOUS-LIKE 20 (AGL20)	Chr2	18807400	18812599	686.151
AT2G45760	BON ASSOCIATION PROTEIN 2 (BAP2)	Chr2	18845800	18847999	567.027	2.45848
AT2G45970	"CYTOCHROME P450, FAMILY 86, SUBFAMILY A, POLYPEPTIDE 8" (CYP86A8)	Chr2	18913400	18915799	1077.3	11.0112
AT2G46630	serine/arginine repetitive matrix protein	Chr2	19145000	19146799	1474.31
AT2G46640	TAC1; TILLER ANGLE CONTROL 1	Chr2	19149000	19150799	651.997
AT2G46685	MICRORNA166A (MIR166A)	Chr2	19175000	19177199	450.857
AT2G46720	3-KETOACYL-COA SYNTHASE 13 (KCS13)	Chr2	19198800	19200399	1210.44
AT2G46740	L -GULONO-1,4-LACTONE ( L -GULL) OXIDASE 5 (GULLO5)	Chr2	19205400	19207599	481.528	12.6215
AT2G46750	L -GULONO-1,4-LACTONE ( L -GULL) OXIDASE 2 (GULLO2)	Chr2	19208000	19211399	1577.21	1.91169
AT2G46760	L -GULONO-1,4-LACTONE ( L -GULL) OXIDASE 6 (GULLO6)	Chr2	19213000	19215599	1410.68
AT2G46770	NAC SECONDARY WALL THICKENING PROMOTING FACTOR1 (NST1)	Chr2	19217000	19223399	4194.47
AT2G46870	NGATHA1 (NGA1)	Chr2	19260800	19264399	893.708	10.0045
AT2G47030	(VGDH1)	Chr2	19324200	19326599	2258.9
AT2G47040	VANGUARD1 (VGD1)	Chr2	19327200	19330399	2841.08
AT2G47050	Plant invertase/pectin methylesterase inhibitor superfamily protein	Chr2	19330800	19332799	450.571
AT2G47120	NAD(P)-binding Rossmann-fold superfamily protein	Chr2	19347200	19348199	215.079
AT2G47460	MYB DOMAIN PROTEIN 12 (MYB12)	Chr2	19478000	19479999	542.977
AT2G47530	Pollen Ole e 1 allergen and extensin family protein	Chr2	19503800	19506799	1539.28
AT2G47540	Pollen Ole e 1 allergen and extensin family protein	Chr2	19503800	19506799	1539.28
AT2G47550	Plant invertase/pectin methylesterase inhibitor superfamily	Chr2	19509000	19510599	224.571	27.666
AT2G47810	"NUCLEAR FACTOR Y, SUBUNIT B5" (NF-YB5)	Chr2	19582200	19583799	351.755
AT2G47870	Thioredoxin superfamily protein	Chr2	19603000	19607399	1084.84
AT2G47880	Glutaredoxin family protein	Chr2	19603000	19607399	1084.84
AT2G48130	Bifunctional inhibitor/lipid-transfer protein/seed storage 2S albumin superfamily protein	Chr2	19684600	19687799	822.394
AT2G48140	EMBRYO SAC DEVELOPMENT ARREST 4 (EDA4)	Chr2	19684600	19687799	822.394
AT3G01060	lysine-tRNA ligase	Chr3	16800	18799	227.117
AT3G01080	WRKY DNA-BINDING PROTEIN 58 (WRKY58)	Chr3	23400	27599	497.61
AT3G01085	Protein kinase superfamily protein	Chr3	28000	29999	221.776
AT3G01185	prolamin-like protein (DUF784)	Chr3	66800	68599	432.151
AT3G01190	Peroxidase superfamily protein	Chr3	66800	68599	432.151
AT3G01220	HOMEOBOX PROTEIN 20 (HB20)	Chr3	73400	74399	199.438
AT3G01230	splicing regulatory glutamine/lysine-rich-like protein	Chr3	75000	79999	796.663
AT3G01240	splicing regulatory glutamine/lysine-rich-like protein	Chr3	75000	79999	796.663
AT3G01250	transmembrane protein	Chr3	75000	79999	796.663
AT3G01260	Galactose mutarotase-like superfamily protein	Chr3	80600	84799	787.764
AT3G01270	Pectate lyase family protein	Chr3	80600	84799	787.764
AT3G01420	(DOX1)	Chr3	159400	162599	511.082	16.5511
AT3G01516	transmembrane protein	Chr3	207200	208199	321.399	2.44653
AT3G01700	ARABINOGALACTAN PROTEIN 11 (AGP11)	Chr3	258800	259599	511.851
AT3G01900	"CYTOCHROME P450, FAMILY 94, SUBFAMILY B, POLYPEPTIDE 2" (CYP94B2)	Chr3	312400	313999	416.925
AT3G01940	transmembrane protein%2C putative (DUF 3339)	Chr3	322800	325399	583.447
AT3G01950	peroxidase (DUF 3339)	Chr3	322800	325399	583.447
AT3G01960	hypothetical protein	Chr3	322800	325399	583.447
AT3G01961	hypothetical protein	Chr3	322800	325399	583.447
AT3G02150	PLASTID TRANSCRIPTION FACTOR 1 (PTF1)	Chr3	391000	393399	269.51	4.30656
AT3G02240	ROOT MERISTEM GROWTH FACTOR 7 (RGF7)	Chr3	418400	423599	1657.01
AT3G02242	GLV8; GOLVEN 8	Chr3	418400	423599	1657.01
AT3G02310	SEPALLATA 2 (SEP2)	Chr3	464800	468599	1396.37
AT3G02610	plant stearoyl-acyl-carrier desaturase family protein	Chr3	555400	557199	299.148
AT3G02670	Glycine-rich protein family	Chr3	573400	575999	919.88	3.66652
AT3G02940	MYB DOMAIN PROTEIN 107 (MYB107)	Chr3	659200	663999	693.459
AT3G03190	GLUTATHIONE S-TRANSFERASE F11 (GSTF11)	Chr3	735400	739599	312.622
AT3G03200	NAC DOMAIN CONTAINING PROTEIN 45 (NAC045)	Chr3	737000	740199	598.558
AT3G03230	alpha/beta-Hydrolases superfamily protein	Chr3	744400	748599	696.567
AT3G03240	alpha/beta-Hydrolases superfamily protein	Chr3	744400	748599	696.567
AT3G03260	HOMEODOMAIN GLABROUS 8 (HDG8)	Chr3	755200	758799	758.418
AT3G03280	hypothetical protein	Chr3	765400	767399	196.548
AT3G03290	Adenine nucleotide alpha hydrolases-like superfamily protein	Chr3	765400	767399	196.548
AT3G03670	Peroxidase superfamily protein	Chr3	901800	903599	594.612	4.44368
AT3G03760	LOB DOMAIN-CONTAINING PROTEIN 20 (LBD20)	Chr3	943400	944999	702.905
AT3G04170	RmlC-like cupins superfamily protein	Chr3	1094600	1098399	1068.44
AT3G04180	RmlC-like cupins superfamily protein	Chr3	1094600	1098399	1068.44
AT3G04190	RmlC-like cupins superfamily protein	Chr3	1101800	1104399	889.6
AT3G04200	RmlC-like cupins superfamily protein	Chr3	1101800	1104399	889.6
AT3G04270	two-component response regulator ARR22-like protein	Chr3	1127800	1131199	408.373
AT3G04280	RESPONSE REGULATOR 22 (RR22)	Chr3	1127800	1131199	408.373
AT3G04290	LI-TOLERANT LIPASE 1 (LTL1)	Chr3	1132600	1136999	621.354
AT3G04370	PLASMODESMATA-LOCATED PROTEIN 4 (PDLP4)	Chr3	1159200	1160999	988.022
AT3G04510	LIGHT SENSITIVE HYPOCOTYLS 2 (LSH2)	Chr3	1215600	1216799	488	19.3718
AT3G04570	AT-HOOK MOTIF NUCLEAR-LOCALIZED PROTEIN 19 (AHL19)	Chr3	1231200	1232399	201.888	56.2249
AT3G04990	intracellular protein transporter	Chr3	1383600	1385199	376.795
AT3G05300	Cytidine/deoxycytidylate deaminase family protein	Chr3	1507800	1508999	227.916
AT3G05440	C2 domain-containing protein	Chr3	1571800	1579999	2812.71
AT3G05450	cystatin-like protein	Chr3	1571800	1579999	2812.71
AT3G05460	sporozoite surface protein-like protein	Chr3	1571800	1579999	2812.71
AT3G05800	ATBS1(ACTIVATION-TAGGED BRI1 SUPPRESSOR 1)-INTERACTING FACTOR 1 (AIF1)	Chr3	1726800	1728199	272.2
AT3G05960	SUGAR TRANSPORTER 6 (STP6)	Chr3	1783000	1785199	379.578
AT3G06120	MUTE (MUTE)	Chr3	1845400	1848199	579.007
AT3G06145	RING zinc finger protein	Chr3	1860000	1860599	180.462
AT3G06460	GNS1/SUR4 membrane protein family	Chr3	1982400	1983799	1034.52
AT3G06990	Cysteine/Histidine-rich C1 domain family protein	Chr3	2206200	2207999	253.451
AT3G07350	sulfate/thiosulfate import ATP-binding protein%2C putative (DUF506)	Chr3	2347000	2348599	198.979	3.41503
AT3G07830	PGA3; POLYGALACTURONASE 3	Chr3	2498800	2503999	676.58
AT3G07840	Pectin lyase-like superfamily protein	Chr3	2498800	2503999	676.58
AT3G07850	Pectin lyase-like superfamily protein	Chr3	2505400	2507599	973.815
AT3G08040	FERRIC REDUCTASE DEFECTIVE 3 (FRD3)	Chr3	2568200	2569999	222.353
AT3G08490	delta-latroinsectotoxin-Lt1a protein	Chr3	2574000	2575799	452.706
AT3G08500	MYB DOMAIN PROTEIN 83 (MYB83)	Chr3	2576800	2578399	273.962
AT3G09220	LACCASE 7 (LAC7)	Chr3	2827200	2831799	2146.79
AT3G09380	MIP18 family protein	Chr3	2885800	2887599	385.144
AT3G09385		Chr3	2885800	2887599	385.144
AT3G09510	Ribonuclease H-like superfamily protein	Chr3	2922600	2925599	929.607
AT3G09520	EXOCYST SUBUNIT EXO70 FAMILY PROTEIN H4 (EXO70H4)	Chr3	2922600	2925599	929.607
AT3G09915		Chr3	3039200	3040199	190.427
AT3G09922	INDUCED BY PHOSPHATE STARVATION1 (IPS1)	Chr3	3050800	3057199	2707.03
AT3G09925	Pollen Ole e 1 allergen and extensin family protein	Chr3	3050800	3057199	2707.03	2.19507
AT3G09930	GDSL-like Lipase/Acylhydrolase superfamily protein	Chr3	3050800	3057199	2707.03
AT3G09940	MONODEHYDROASCORBATE REDUCTASE (MDHAR)	Chr3	3050800	3057199	2707.03	19.1369
AT3G09990	Nucleoside transporter family protein	Chr3	3073400	3080199	2508.99
AT3G10000	EMBRYO SAC DEVELOPMENT ARREST 31 (EDA31)	Chr3	3073400	3080199	2508.99
AT3G10280	3-KETOACYL-COA SYNTHASE 14 (KCS14)	Chr3	3180000	3181799	1391.17
AT3G10340	PHENYLALANINE AMMONIA-LYASE 4 (PAL4)	Chr3	3203400	3207199	896.277	1.59684
AT3G10470	C2H2-type zinc finger family protein	Chr3	3259400	3261799	383.885
AT3G10510	Galactose oxidase/kelch repeat superfamily protein	Chr3	3274800	3275799	254.527
AT3G10575		Chr3	3306400	3313399	2909.47
AT3G10580	Homeodomain-like superfamily protein	Chr3	3306400	3313399	2909.47
AT3G10585	Homeodomain-like superfamily protein	Chr3	3306400	3313399	2909.47
AT3G10590	Duplicated homeodomain-like superfamily protein	Chr3	3306400	3313399	2909.47	1.1692
AT3G10595	Duplicated homeodomain-like superfamily protein	Chr3	3306400	3313399	2909.47
AT3G10600	CATIONIC AMINO ACID TRANSPORTER 7 (CAT7)	Chr3	3313800	3314999	283.797
AT3G10720	Plant invertase/pectin methylesterase inhibitor superfamily	Chr3	3356800	3357599	356.86	1.81755
AT3G10750	FBD domain family	Chr3	3366800	3368599	208.914
AT3G11060	transmembrane protein	Chr3	3466000	3467399	230.154
AT3G11110	RING/U-box superfamily protein	Chr3	3479600	3480599	472.714
AT3G11150	2-oxoglutarate (2OG) and Fe(II)-dependent oxygenase superfamily protein	Chr3	3494000	3499199	2478.77	5.74075
AT3G11160	transmembrane protein	Chr3	3494000	3499199	2478.77
AT3G11165	hypothetical protein	Chr3	3494000	3499199	2478.77
AT3G11180	2-oxoglutarate (2OG) and Fe(II)-dependent oxygenase superfamily protein	Chr3	3504000	3506999	668.243
AT3G11300	hypothetical protein	Chr3	3538600	3541399	489.441
AT3G11310	Myb/SANT-like DNA-binding domain protein	Chr3	3542000	3544999	265.859
AT3G11325	Phospholipid/glycerol acyltransferase family protein	Chr3	3549800	3550999	420.453
AT3G11380	Pentatricopeptide repeat (PPR) superfamily protein	Chr3	3561200	3565799	231.153
AT3G11430	GLYCEROL-3-PHOSPHATE ACYLTRANSFERASE 5 (GPAT5)	Chr3	3596000	3597999	818.691	1.29463
AT3G11435	MICRORNA172C (MIR172C)	Chr3	3598400	3600199	710.728
AT3G11480	(BSMT1)	Chr3	3613000	3615199	214.248
AT3G11920	glutaredoxin-like protein	Chr3	3772200	3774399	243.85
AT3G11930	Adenine nucleotide alpha hydrolases-like superfamily protein	Chr3	3776000	3777399	258.658	59.3916
AT3G12143		Chr3	3872200	3873599	267.156
AT3G12203	SERINE CARBOXYPEPTIDASE-LIKE 17 (scpl17)	Chr3	3892000	3895399	421.125
AT3G12210	DNA binding protein	Chr3	3892000	3895399	421.125	3.69929
AT3G12410	Polynucleotidyl transferase%2C ribonuclease H-like superfamily protein	Chr3	3946200	3950599	2908.78
AT3G12420	Polynucleotidyl transferase%2C ribonuclease H-like superfamily protein	Chr3	3946200	3950599	2908.78
AT3G12430	Polynucleotidyl transferase%2C ribonuclease H-like superfamily protein	Chr3	3946200	3950599	2908.78
AT3G12440	Polynucleotidyl transferase%2C ribonuclease H-like superfamily protein	Chr3	3951000	3956999	3540.29
AT3G12450		Chr3	3951000	3956999	3540.29
AT3G12460	Polynucleotidyl transferase%2C ribonuclease H-like superfamily protein	Chr3	3951000	3956999	3540.29
AT3G12470	Polynucleotidyl transferase%2C ribonuclease H-like superfamily protein	Chr3	3951000	3956999	3540.29
AT3G12720	MYB DOMAIN PROTEIN 67 (MYB67)	Chr3	4043600	4048999	1353.2
AT3G12730	Homeodomain-like superfamily protein	Chr3	4043600	4048999	1353.2
AT3G12850	COP9 signalosome complex-related / CSN complex-like protein	Chr3	4088400	4090199	461.484
AT3G12890	ACTIVATOR OF SPOMIN::LUC2 (ASML2)	Chr3	4097200	4102599	1431.7
AT3G12900	2-oxoglutarate (2OG) and Fe(II)-dependent oxygenase superfamily protein	Chr3	4104200	4106599	1080.18
AT3G12910	NAC (No Apical Meristem) domain transcriptional regulator superfamily protein	Chr3	4109200	4110799	838.451
AT3G13130	transmembrane protein	Chr3	4222800	4224999	200.202
AT3G13228	RING/U-box superfamily protein	Chr3	4266800	4269599	1200.23
AT3G13229	kinesin-like protein (DUF868)	Chr3	4266800	4269599	1200.23
AT3G13280	Putative endonuclease or glycosyl hydrolase	Chr3	4295400	4297399	680.434
AT3G13390	SKU5 SIMILAR 11 (sks11)	Chr3	4351600	4353799	308.688
AT3G13400	SKU5 SIMILAR 13 (sks13)	Chr3	4354600	4357799	1170.09
AT3G13540	MYB DOMAIN PROTEIN 5 (MYB5)	Chr3	4420000	4422799	962.84	2.47431
AT3G13760	Cysteine/Histidine-rich C1 domain family protein	Chr3	4517400	4518999	278.991
AT3G13784	CELL WALL INVERTASE 5 (CWINV5)	Chr3	4529000	4530399	401.251
AT3G13810	INDETERMINATE(ID)-DOMAIN 11 (IDD11)	Chr3	4544000	4548999	1633.55	1.20657
AT3G13820	F-box and associated interaction domains-containing protein	Chr3	4543800	4551199	1057.36
AT3G13890	MYB DOMAIN PROTEIN 26 (MYB26)	Chr3	4576400	4579999	815.948
AT3G13950	ankyrin	Chr3	4603800	4605599	263.1	1.05466
AT3G13960	GROWTH-REGULATING FACTOR 5 (GRF5)	Chr3	4607400	4610199	912.17
AT3G14040	Pectin lyase-like superfamily protein	Chr3	4648400	4650399	466.916
AT3G14210	EPITHIOSPECIFIER MODIFIER 1 (ESM1)	Chr3	4726800	4731999	989.747
AT3G14250	RING/U-box superfamily protein	Chr3	4746200	4747199	262.128
AT3G14300	(ATPMEPCRC)	Chr3	4767800	4770199	312.61
AT3G14310	PECTIN METHYLESTERASE 3 (PME3)	Chr3	4773600	4775199	478.636	4.31589
AT3G14480	glycine/proline-rich protein	Chr3	4861800	4868399	1354.19
AT3G14490	Terpenoid cyclases/Protein prenyltransferases superfamily protein	Chr3	4861800	4868399	1354.19
AT3G14510	Polyprenyl synthetase family protein	Chr3	4861800	4868399	1354.19
AT3G14780	callose synthase	Chr3	4960400	4963799	407.474
AT3G14820	GDSL-like Lipase/Acylhydrolase superfamily protein	Chr3	4979000	4981999	280.906
AT3G14880	transcription factor-like protein	Chr3	5006400	5007999	323.646
AT3G15055		Chr3	5068200	5068999	195.016
AT3G15280	hypothetical protein	Chr3	5143600	5144799	357
AT3G15370	EXPANSIN 12 (EXPA12)	Chr3	5190600	5192199	209.215
AT3G15604	hypothetical protein	Chr3	5287200	5289999	279.803
AT3G15605	nucleic acid binding protein	Chr3	5287200	5289999	279.803
AT3G15680	Ran BP2/NZF zinc finger-like superfamily protein	Chr3	5315200	5316199	324.272
AT3G15830	phosphatidic acid phosphatase-related / PAP2-like protein	Chr3	5354600	5357999	658.504
AT3G15840	POST-ILLUMINATION CHLOROPHYLL FLUORESCENCE INCREASE (PIFI)	Chr3	5354600	5357999	658.504
AT3G15870	Fatty acid desaturase family protein	Chr3	5362000	5363799	369.423
AT3G15909	hypothetical protein	Chr3	5381400	5383199	1189.9
AT3G15910	hypothetical protein	Chr3	5381400	5383199	1189.9
AT3G15935		Chr3	5390600	5393199	348.886
AT3G15960	mismatched DNA binding / ATP binding protein	Chr3	5404000	5406399	184.879
AT3G16240	DELTA TONOPLAST INTEGRAL PROTEIN (DELTA-TIP)	Chr3	5505400	5506999	557.366	96.8107
AT3G16330	Avr9/Cf-9 rapidly elicited protein	Chr3	5535200	5536399	316.938	4.79364
AT3G16390	NITRILE SPECIFIER PROTEIN 3 (NSP3)	Chr3	5562400	5564399	730.127	2.47388
AT3G16400	NITRILE SPECIFIER PROTEIN 1 (NSP1)	Chr3	5567200	5568199	198.725	56.2787
AT3G16410	NITRILE SPECIFIER PROTEIN 4 (NSP4)	Chr3	5571800	5574599	661.581	22.2554
AT3G16440	MYROSINASE-BINDING PROTEIN-LIKE PROTEIN-300B (MLP-300B)	Chr3	5585800	5587599	374.732	4.88361
AT3G16540	DEGP PROTEASE 11 (DegP11)	Chr3	5626200	5630199	291.352
AT3G16580	F-box and associated interaction domains-containing protein	Chr3	5647000	5652599	1342.12
AT3G16590	F-box and associated interaction domains-containing protein	Chr3	5647000	5652599	1342.12
AT3G16660	Pollen Ole e 1 allergen and extensin family protein	Chr3	5676600	5679199	663.472
AT3G16670	Pollen Ole e 1 allergen and extensin family protein	Chr3	5681200	5683999	359.699
AT3G16680	DNA binding / DNA-directed RNA polymerase	Chr3	5681200	5683999	359.699
AT3G16920	CHITINASE-LIKE PROTEIN 2 (CTL2)	Chr3	5776200	5777999	384.345	2.41595
AT3G17060	Pectin lyase-like superfamily protein	Chr3	5815800	5818599	231.156
AT3G17070	Peroxidase family protein	Chr3	5822000	5824799	554.252
AT3G17110		Chr3	5837600	5838799	455.644	24.0614
AT3G17130	Plant invertase/pectin methylesterase inhibitor superfamily protein	Chr3	5844400	5845399	405.903
AT3G17180	SERINE CARBOXYPEPTIDASE-LIKE 33 (scpl33)	Chr3	5855400	5858999	328.629
AT3G17185	TRANS-ACTING SIRNA3 (TAS3)	Chr3	5861800	5864399	366.544	11.4777
AT3G17203	GIBBERELLIN 2-OXIDASE 5 (GA2OX5)	Chr3	5869200	5872799	1331.17
AT3G17261	transmembrane protein	Chr3	5896200	5901199	1303.73
AT3G17265	F-box and associated interaction domains-containing protein	Chr3	5896200	5901199	1303.73
AT3G17320	F-BOX OVEREXPRESSED/OPPRESSED ABA SIGNALING 1 (FOA1)	Chr3	5913600	5916799	1112.27
AT3G17480	F-box/associated interaction domain protein	Chr3	5982800	5988399	1655.11
AT3G17490	F-box and associated interaction domains-containing protein	Chr3	5982800	5988399	1655.11
AT3G17500	F-box family protein	Chr3	5982800	5988399	1655.11
AT3G17520	Late embryogenesis abundant protein (LEA) family protein	Chr3	5999600	6011999	1727.37
AT3G17530	F-box and associated interaction domains-containing protein	Chr3	6000600	6012199	2809.61
AT3G17540	F-box and associated interaction domains-containing protein	Chr3	6000600	6012199	2809.61
AT3G17550	Haloacid dehalogenase-like hydrolase (HAD) superfamily protein	Chr3	6000600	6012199	2809.61
AT3G17560	F-box and associated interaction domains-containing protein	Chr3	6000600	6012199	2809.61
AT3G17570	F-box and associated interaction domains-containing protein	Chr3	6000600	6012199	2809.61
AT3G17730	NAC DOMAIN CONTAINING PROTEIN 57 (NAC057)	Chr3	6064000	6065999	687.701
AT3G18010	WUSCHEL RELATED HOMEOBOX 1 (WOX1)	Chr3	6158200	6161799	1153.45
AT3G18217	MICRORNA157C (MIR157C)	Chr3	6243600	6247199	368.755
AT3G18220	LIPID PHOSPHATE PHOSPHATASE 4 (LPP4)	Chr3	6247600	6249399	203.381
AT3G18330	F-box family protein	Chr3	6290800	6295799	975.463
AT3G18340	F-box and associated interaction domains-containing protein	Chr3	6290800	6295799	975.463
AT3G18400	NAC DOMAIN CONTAINING PROTEIN 58 (NAC058)	Chr3	6318400	6322399	561.276	10.6697
AT3G18470	PLAC8 family protein	Chr3	6334800	6335999	328.854
AT3G18550	BRANCHED 1 (BRC1)	Chr3	6382000	6386399	1599.5
AT3G18560	hypothetical protein	Chr3	6392600	6394799	722.89	3.19197
AT3G18650	AGAMOUS-LIKE 103 (agl103)	Chr3	6417000	6418599	350.936
AT3G19055	hypothetical protein	Chr3	6590800	6595599	2299.39
AT3G19070	Homeodomain-like superfamily protein	Chr3	6590800	6595599	2299.39
AT3G19160	ATP/ADP ISOPENTENYLTRANSFERASES (IPT8)	Chr3	6621600	6623399	421.924
AT3G19184	AP2/B3-like transcriptional factor family protein	Chr3	6637400	6638999	374.448
AT3G19270	"CYTOCHROME P450, FAMILY 707, SUBFAMILY A, POLYPEPTIDE 4" (CYP707A4)	Chr3	6675000	6677799	371.455
AT3G19430	late embryogenesis abundant protein-related / LEA protein-like protein	Chr3	6736400	6738399	408.979
AT3G19710	BRANCHED-CHAIN AMINOTRANSFERASE4 (BCAT4)	Chr3	6847000	6849799	559.146
AT3G19880	F-box and associated interaction domains-containing protein	Chr3	6911400	6916999	1089.44
AT3G19890	F-box family protein	Chr3	6911400	6916999	1089.44
AT3G19920	BTB/POZ domain protein	Chr3	6930200	6932199	663.556
AT3G20155	hypothetical protein	Chr3	7037800	7040199	1429.56
AT3G20160	Terpenoid synthases superfamily protein	Chr3	7037800	7040199	1429.56
AT3G20470	GLYCINE-RICH PROTEIN 5 (GRP5)	Chr3	7139200	7141799	1706.36	211.311
AT3G20555	hypothetical protein	Chr3	7177800	7181399	1160.04
AT3G20557	hypothetical protein	Chr3	7177800	7181399	1160.04
AT3G20580	COBRA-LIKE PROTEIN 10 PRECURSOR (COBL10)	Chr3	7188800	7190599	248.774
AT3G20640	basic helix-loop-helix (bHLH) DNA-binding superfamily protein	Chr3	7210200	7213599	1210.24
AT3G20750	GATA TRANSCRIPTION FACTOR 29 (GATA29)	Chr3	7253200	7259799	2262.49
AT3G20760	Nse4%2C component of Smc5/6 DNA repair complex	Chr3	7253200	7259799	2262.49
AT3G20840	PLETHORA 1 (PLT1)	Chr3	7295200	7302799	868.88	16.5111
AT3G20880	WIP DOMAIN PROTEIN 4 (WIP4)	Chr3	7313400	7315999	770.717	4.83922
AT3G20978		Chr3	7353800	7363199	3456.56
AT3G20980	Gag-Pol-related retrotransposon family protein	Chr3	7353800	7363199	3456.56
AT3G20993	LOW-MOLECULAR-WEIGHT CYSTEINE-RICH 56 (LCR56)	Chr3	7353800	7363199	3456.56
AT3G20997	LOW-MOLECULAR-WEIGHT CYSTEINE-RICH 55 (LCR55)	Chr3	7353800	7363199	3456.56
AT3G21055	PHOTOSYSTEM II SUBUNIT T (PSBTN)	Chr3	7365800	7377199	5559.56	5.09499
AT3G21090	ATP-BINDING CASSETTE G15 (ABCG15)	Chr3	7393800	7395999	251.163	3.38032
AT3G21210	zinc ion binding protein	Chr3	7438600	7440999	608.301
AT3G21338		Chr3	7511400	7516599	258.967
AT3G21340	Leucine-rich repeat protein kinase family protein	Chr3	7511400	7516599	258.967
AT3G21370	BETA GLUCOSIDASE 19 (BGLU19)	Chr3	7524400	7530799	1987.69
AT3G21371	transmembrane protein	Chr3	7524400	7530799	1987.69
AT3G21380	Mannose-binding lectin superfamily protein	Chr3	7524400	7530799	1987.69
AT3G21560	UDP-GLUCOSYL TRANSFERASE 84A2 (UGT84A2)	Chr3	7596000	7597399	223.491	1.99086
AT3G21710	VASCULAR-RELATED UNKNOWN PROTEIN 1; VUP1	Chr3	7648200	7651199	553.017	1.32392
AT3G21720	ISOCITRATE LYASE (ICL)	Chr3	7652000	7658199	2500.63	74.7118
AT3G21791		Chr3	7678800	7681999	1438.47
AT3G21800	UDP-GLUCOSYL TRANSFERASE 71B8 (UGT71B8)	Chr3	7678800	7681999	1438.47
AT3G21830	SKP1-LIKE 8 (SK8)	Chr3	7693200	7696399	1128.07
AT3G21840	SKP1-LIKE 7 (SK7)	Chr3	7693200	7696399	1128.07
AT3G21850	SKP1-LIKE 9 (SK9)	Chr3	7696800	7700399	867.989
AT3G21860	SKP1-LIKE 10 (SK10)	Chr3	7696800	7700399	867.989
AT3G21870	CYCLIN P2;1 (CYCP2;1)	Chr3	7704000	7710399	1619.78
AT3G21880	B-BOX DOMAIN PROTEIN 10; BBX10	Chr3	7704000	7710399	1619.78
AT3G21890	B-box type zinc finger family protein	Chr3	7704000	7710399	1619.78
AT3G21900	Receptor-like protein kinase-related family protein	Chr3	7714000	7741599	7157.04
AT3G21910	cysteine-rich repeat secretory protein%2C putative (DUF26)	Chr3	7714000	7741599	7157.04
AT3G21920	cysteine-rich repeat secretory protein%2C putative (DUF26)	Chr3	7714000	7741599	7157.04
AT3G21930	cysteine-rich repeat secretory protein	Chr3	7714000	7741599	7157.04
AT3G21933		Chr3	7714000	7741599	7157.04
AT3G21937		Chr3	7714000	7741599	7157.04
AT3G21940	Receptor protein kinase-like protein	Chr3	7714000	7741599	7157.04
[truncated: 1,950 more rows]
