# Supplementary material for: H3K27me3 epigenetic mark crucial for callus cell identity and regeneration capacity
Source: Research Square preprint supplement (doi:10.21203/rs.3.rs-5582331/v1), 2025-01-24
Supplement: Supplementary file 6 [file 5c52498a55dfd09bf9599f7d.xlsx]

## Sheet: Table S13 emf2 H3K4me3
Supplementary Data 10: emf2 callus H3K4me3 marked genes
columns A and B show genes associated with H3K4me3 peaks.
columns C-E show peak location.
column F show peak score. H3K4me3 peaks were selected using cutoff of -log10qvalue > 40 (claculated using MACS2 program)
Gene.ID	gene_name	Chromosome	peak.start	peak.end	-log10Qvalue	peak.score
AT1G01010	NAC DOMAIN CONTAINING PROTEIN 1 (NAC001)	Chr1	3468	5148	251	2510
AT1G01020	(ARV1)	Chr1	7943	8787	160.7	1607
AT1G01030	NGATHA3 (NGA3)	Chr1	11936	13625	183.8	1838
AT1G01040	DICER-LIKE 1 (DCL1)	Chr1	22983	24240	333	3330
AT1G01050	PYROPHOSPHORYLASE 1 (PPa1)	Chr1	32283	33263	260.3	2603
AT1G01060	LATE ELONGATED HYPOCOTYL (LHY)	Chr1	36742	37965	272.3	2723
AT1G01080	RNA-binding (RRM/RBD/RNP motifs) family protein	Chr1	45930	46864	155	1550
AT1G01090	PYRUVATE DEHYDROGENASE E1 ALPHA (PDH-E1 ALPHA)	Chr1	48295	49377	139.4	1394
AT1G01100	60S acidic ribosomal protein family	Chr1	50289	51264	127.8	1278
AT1G01110	IQ-DOMAIN 18 (IQD18)	Chr1	52166	52815	51.2	512
AT1G01120	3-KETOACYL-COA SYNTHASE 1 (KCS1)	Chr1	57505	59125	208.9	2089
AT1G01130	CBL-interacting Serine/Threonine-kinase	Chr1	63324	64464	246	2460
AT1G01140	CBL-INTERACTING PROTEIN KINASE 9 (CIPK9)	Chr1	67094	67748	118.8	1188
AT1G01160	GRF1-INTERACTING FACTOR 2 (GIF2)	Chr1	72218	73257	270.7	2707
AT1G01180	S-adenosyl-L-methionine-dependent methyltransferases superfamily protein	Chr1	75519	76484	211.2	2112
AT1G01200	RAB GTPASE HOMOLOG A3 (RABA3)	Chr1	86625	87289	147.4	1474
AT1G01210	DNA-directed RNA polymerase%2C subunit M%2C archaeal	Chr1	88815	89697	153.9	1539
AT1G01220	L-FUCOKINASE/GDP-L-FUCOSE PYROPHOSPHORYLASE (FKGP)	Chr1	91241	92396	168.4	1684
AT1G01225	NC domain-containing protein-like protein	Chr1	95980	96835	96.9	969
AT1G01230	ORMDL family protein	Chr1	97300	98295	204.2	2042
AT1G01240	transmembrane protein	Chr1	99845	100905	161.5	1615
AT1G01260	BHLH013; BHLH13; JAM2; JASMONATE ASSOCIATED MYC2 LIKE 2	Chr1	108902	110455	284.7	2847
AT1G01290	COFACTOR OF NITRATE REDUCTASE AND XANTHINE DEHYDROGENASE 3 (CNX3)	Chr1	114252	115120	94.3	943
AT1G01300	Eukaryotic aspartyl protease family protein	Chr1	116995	118651	184.5	1845
AT1G01320	REC1; REDUCED CHLOROPLAST COVERAGE	Chr1	127421	128503	334.6	3346
AT1G01350	Zinc finger (CCCH-type/C3HC4-type RING finger) family protein	Chr1	135450	136850	261.2	2612
AT1G01360	REGULATORY COMPONENT OF ABA RECEPTOR 1 (RCAR1)	Chr1	141873	143110	268	2680
AT1G01370	(HTR12)	Chr1	143474	144522	175.8	1758
AT1G01390	UDP-Glycosyltransferase superfamily protein	Chr1	149294	149842	80.4	804
AT1G01420	UDP-GLUCOSYL TRANSFERASE 72B3 (UGT72B3)	Chr1	155441	156059	76.8	768
AT1G01430	TRICHOME BIREFRINGENCE-LIKE 25 (TBL25)	Chr1	157164	158674	174.8	1748
AT1G01440	hypothetical protein (DUF3133)	Chr1	161802	162823	178.7	1787
AT1G01448		Chr1	163247	164094	164.2	1642
AT1G01490	Heavy metal transport/detoxification superfamily protein	Chr1	180446	182316	151.5	1515
AT1G01500	Erythronate-4-phosphate dehydrogenase family protein	Chr1	185092	186219	130	1300
AT1G01510	ANGUSTIFOLIA (AN)	Chr1	187039	188289	240.6	2406
AT1G01540	Protein kinase superfamily protein	Chr1	195649	197063	187.9	1879
AT1G01550	BYPASS 1 (BPS1)	Chr1	199717	201321	100	1000
AT1G01570	transferring glycosyl group transferase (DUF604)	Chr1	204970	205964	157	1570
AT1G01600	"CYTOCHROME P450, FAMILY 86, SUBFAMILY A, POLYPEPTIDE 4" (CYP86A4)	Chr1	219070	221046	45.7	457
AT1G01610	GLYCEROL-3-PHOSPHATE ACYLTRANSFERASE 4 (GPAT4)	Chr1	223494	224297	67.5	675
AT1G01620	PLASMA MEMBRANE INTRINSIC PROTEIN 1C (PIP1C)	Chr1	225884	227280	172.3	1723
AT1G01630	Sec14p-like phosphatidylinositol transfer family protein	Chr1	228922	229930	153.1	1531
AT1G01640	BTB/POZ domain-containing protein	Chr1	231913	232549	110.1	1101
AT1G01650	SIGNAL PEPTIDE PEPTIDASE-LIKE 4 (SPPL4)	Chr1	236789	237906	340.3	3403
AT1G01670	RING/U-box superfamily protein	Chr1	245154	246062	78.1	781
AT1G01690	PUTATIVE RECOMBINATION INITIATION DEFECTS 3 (PRD3)	Chr1	248983	250068	259	2590
AT1G01710	acyl-CoA thioesterase II	Chr1	262757	263745	205.5	2055
AT1G01720	(ATAF1)	Chr1	268279	269734	122.4	1224
AT1G01730	hypothetical protein	Chr1	270824	271771	86.3	863
AT1G01740	kinase with tetratricopeptide repeat domain-containing protein	Chr1	273986	274658	66.4	664
AT1G01760	denosine deaminases acting on tRNA	Chr1	277751	279714	185.4	1854
AT1G01770	propionyl-CoA carboxylase	Chr1	277751	279714	213.6	2136
AT1G01790	K+ EFFLUX ANTIPORTER 1 (KEA1)	Chr1	284407	285229	105.7	1057
AT1G01800	NAD(P)-binding Rossmann-fold superfamily protein	Chr1	293281	294467	194.5	1945
AT1G01810	hypothetical protein	Chr1	295141	295783	84.7	847
AT1G01820	PEROXIN 11C (PEX11C)	Chr1	297391	298144	64.6	646
AT1G01830	ARM repeat superfamily protein	Chr1	298684	299622	112.4	1124
AT1G01840	AP2-like ethylene-responsive transcription factor SNZ	Chr1	303496	304258	129.8	1298
AT1G01860	PALEFACE 1 (PFC1)	Chr1	305535	306429	171	1710
AT1G01880	5'-3' exonuclease family protein	Chr1	308326	309234	151	1510
AT1G01910	ATGET3A; GET3A; GUIDED ENTRY OF TAIL-ANCHORED PROTEIN 3A	Chr1	315121	316941	230.3	2303
AT1G01920	SET domain-containing protein	Chr1	315121	316941	214.1	2141
AT1G01930	zinc finger protein-like protein	Chr1	321760	323744	148.3	1483
AT1G01940	Cyclophilin-like peptidyl-prolyl cis-trans isomerase family protein	Chr1	321760	323744	135.9	1359
AT1G01950	ARMADILLO REPEAT KINESIN 2 (ARK2)	Chr1	325265	326285	202.5	2025
AT1G01960	EMBRYO SAC DEVELOPMENT ARREST 10 (EDA10)	Chr1	336171	337961	222.2	2222
AT1G01970	Tetratricopeptide repeat (TPR)-like superfamily protein	Chr1	338203	338956	124	1240
AT1G01990	hypothetical protein	Chr1	343238	344417	144.4	1444
AT1G02000	UDP-D-GLUCURONATE 4-EPIMERASE 2 (GAE2)	Chr1	345761	347228	154.2	1542
AT1G02010	SECRETORY 1A (SEC1A)	Chr1	347782	348476	99.4	994
AT1G02020	nitroreductase family protein	Chr1	353418	355019	308.9	3089
AT1G02060	Tetratricopeptide repeat (TPR)-like superfamily protein	Chr1	361813	363330	356	3560
AT1G02080	transcription regulator	Chr1	373328	374819	230.5	2305
AT1G02090	FUSCA 5 (FUS5)	Chr1	388598	390673	144.8	1448
AT1G02100	SUPPRESSOR OF BRI1 (SBI1)	Chr1	388598	390673	126	1260
AT1G02110	bZIP domain class transcription factor (DUF630 and DUF632)	Chr1	392829	394227	89.7	897
AT1G02120	VASCULAR ASSOCIATED DEATH1 (VAD1)	Chr1	395612	396791	188.6	1886
AT1G02130	RAS 5 (RA-5)	Chr1	401122	401970	163	1630
AT1G02140	MAGO NASHI (MAGO)	Chr1	403617	405422	170.8	1708
AT1G02145	HOMOLOG OF ASPARAGINE-LINKED GLYCOSYLATION 12 (ALG12)	Chr1	403617	405422	123.5	1235
AT1G02150	Tetratricopeptide repeat (TPR)-like superfamily protein	Chr1	408665	409651	96.8	968
AT1G02160	Cox19 family protein (CHCH motif)	Chr1	410682	411369	93.5	935
AT1G02170	METACASPASE 1 (MC1)	Chr1	411667	412872	140.2	1402
AT1G02180	ferredoxin-like protein	Chr1	414013	414700	112	1120
AT1G02220	NAC DOMAIN CONTAINING PROTEIN 3 (NAC003)	Chr1	429053	430816	282.8	2828
AT1G02230	NAC DOMAIN CONTAINING PROTEIN 4 (NAC004)	Chr1	435964	437030	272.7	2727
AT1G02260	Divalent ion symporter	Chr1	442254	442894	41	410
AT1G02270	Calcium-binding endonuclease/exonuclease/phosphatase family	Chr1	445251	446398	252.4	2524
AT1G02280	TRANSLOCON AT THE OUTER ENVELOPE MEMBRANE OF CHLOROPLASTS 33 (TOC33)	Chr1	449713	450525	176.7	1767
AT1G02290	hypothetical protein	Chr1	452018	452858	209.9	2099
AT1G02305	ATCATHB2	Chr1	455603	456639	224.2	2242
AT1G02330	integrator complex subunit-like protein	Chr1	462536	463775	334.6	3346
AT1G02350	protoporphyrinogen oxidase-like protein	Chr1	469703	471535	101	1010
AT1G02360	Chitinase family protein	Chr1	472565	473098	52.7	527
AT1G02370	Tetratricopeptide repeat (TPR)-like superfamily protein	Chr1	474369	475286	110.6	1106
AT1G02380	transmembrane protein	Chr1	476998	478225	111.3	1113
AT1G02400	GIBBERELLIN 2-OXIDASE 6 (GA2OX6)	Chr1	486833	487899	175.8	1758
AT1G02410	cytochrome c oxidase assembly protein CtaG / Cox11 family	Chr1	490815	491806	160.3	1603
AT1G02420	Pentatricopeptide repeat (PPR) superfamily protein	Chr1	493421	494400	196	1960
AT1G02450	NIM1-INTERACTING 1 (NIMIN1)	Chr1	497884	498564	132.6	1326
AT1G02475	Polyketide cyclase/dehydrase and lipid transport superfamily protein	Chr1	514466	515457	196.6	1966
AT1G02500	S-ADENOSYLMETHIONINE SYNTHETASE 1 (SAM1)	Chr1	518169	520022	200	2000
AT1G02520	ATP-BINDING CASSETTE B11 (ABCB11)	Chr1	523602	524830	130	1300
AT1G02530	ATP-BINDING CASSETTE B12 (ABCB12)	Chr1	529620	530448	104.6	1046
AT1G02560	NUCLEAR ENCODED CLP PROTEASE 5 (CLPP5)	Chr1	537681	538871	347.5	3475
AT1G02610	RING/FYVE/PHD zinc finger superfamily protein	Chr1	555157	556067	131.3	1313
AT1G02650	Tetratricopeptide repeat (TPR)-like superfamily protein	Chr1	568541	570052	162.2	1622
AT1G02660	alpha/beta-Hydrolases superfamily protein	Chr1	573777	575041	272.8	2728
AT1G02680	TBP-ASSOCIATED FACTOR 13 (TAF13)	Chr1	580464	581343	234.8	2348
AT1G02690	IMPORTIN ALPHA ISOFORM 6 (IMPA-6)	Chr1	584104	585234	275.3	2753
AT1G02720	GALACTURONOSYLTRANSFERASE 5 (GATL5)	Chr1	591787	593191	265.4	2654
AT1G02740	MORF RELATED GENE 2; MRG2	Chr1	601329	602310	188.5	1885
AT1G02750	Drought-responsive family protein	Chr1	602429	603481	196.7	1967
AT1G02780	EMBRYO DEFECTIVE 2386 (emb2386)	Chr1	608242	609634	345.9	3459
AT1G02810	Plant invertase/pectin methylesterase inhibitor superfamily	Chr1	618212	619422	226.9	2269
AT1G02816	pectinesterase (Protein of unknown function%2C DUF538)	Chr1	621405	622553	211.3	2113
AT1G02840	SERINE/ARGININE-RICH PROTEIN SPLICING FACTOR 34 (SR34)	Chr1	626706	627859	139.9	1399
AT1G02850	BETA GLUCOSIDASE 11 (BGLU11)	Chr1	630389	632309	129.6	1296
AT1G02860	NITROGEN LIMITATION ADAPTATION (NLA)	Chr1	635316	636673	112.6	1126
AT1G02870	nucleolar-like protein	Chr1	637877	638765	195.3	1953
AT1G02880	THIAMIN PYROPHOSPHOKINASE1 (TPK1)	Chr1	643274	644737	281.7	2817
AT1G02890	AAA-type ATPase family protein	Chr1	650646	652078	350.5	3505
AT1G02910	LOW PSII ACCUMULATION1 (LPA1)	Chr1	657327	658310	240.2	2402
AT1G02920	GLUTATHIONE S-TRANSFERASE 7 (GSTF7)	Chr1	658807	659796	89	890
AT1G02930	GLUTATHIONE S-TRANSFERASE 6 (GSTF6)	Chr1	661218	662236	78.1	781
AT1G02960	kinetochore protein	Chr1	669030	669999	283.9	2839
AT1G02970	WEE1 KINASE HOMOLOG (WEE1)	Chr1	673241	674089	240.5	2405
AT1G02990	hypothetical protein	Chr1	686553	687494	308.8	3088
AT1G03000	PEROXIN 6 (PEX6)	Chr1	691456	692738	295.2	2952
AT1G03010	Phototropic-responsive NPH3 family protein	Chr1	693407	694380	52.4	524
AT1G03030	P-loop containing nucleoside triphosphate hydrolases superfamily protein	Chr1	701347	702435	225.3	2253
AT1G03040	basic helix-loop-helix (bHLH) DNA-binding superfamily protein	Chr1	705311	706747	241.9	2419
AT1G03060	SPIRRIG (SPI)	Chr1	726147	727465	349.9	3499
AT1G03080	NETWORKED 1D (NET1D)	Chr1	736974	738137	230.1	2301
AT1G03090	(MCCA)	Chr1	739504	740765	261	2610
AT1G03100	Pentatricopeptide repeat (PPR) superfamily protein	Chr1	745774	746785	210.2	2102
AT1G03110	TRNA MODIFICATION 82 (TRM82)	Chr1	749150	750036	225.1	2251
AT1G03140	splicing factor Prp18 family protein	Chr1	755123	756992	268.5	2685
AT1G03150	Acyl-CoA N-acyltransferases (NAT) superfamily protein	Chr1	755123	756992	166.3	1663
AT1G03160	FZO-LIKE (FZL)	Chr1	761109	762490	345.5	3455
AT1G03180	non-structural protein	Chr1	773303	774153	259.2	2592
AT1G03190	ULTRAVIOLET HYPERSENSITIVE 6 (UVH6)	Chr1	775370	776508	272.7	2727
AT1G03200	hypothetical protein	Chr1	780475	781307	153.2	1532
AT1G03210	Phenazine biosynthesis PhzC/PhzF protein	Chr1	782806	783520	126.9	1269
AT1G03220	Eukaryotic aspartyl protease family protein	Chr1	787013	788486	146.3	1463
AT1G03230	Eukaryotic aspartyl protease family protein	Chr1	789986	791316	129	1290
AT1G03250	R3H domain protein	Chr1	794609	795437	119.3	1193
AT1G03260	SNARE associated Golgi protein family	Chr1	797668	798579	200	2000
AT1G03270	CBS domain protein with a domain protein (DUF21)	Chr1	798997	799849	152.3	1523
AT1G03280	Transcription factor TFIIE%2C alpha subunit	Chr1	802958	803743	161.2	1612
AT1G03290	ELKS/Rab6-interacting/CAST family protein	Chr1	807233	808470	222.6	2226
AT1G03300	DOMAIN OF UNKNOWN FUNCTION 724 1 (ATDUF1)	Chr1	812367	814190	225.2	2252
AT1G03310	DEBRANCHING ENZYME 1 (DBE1)	Chr1	812367	814190	252.7	2527
AT1G03330	LSM2; SM-LIKE 2	Chr1	818622	819537	230.1	2301
AT1G03350	BSD domain-containing protein	Chr1	823283	825317	159.8	1598
AT1G03360	RIBOSOMAL RNA PROCESSING 4 (RRP4)	Chr1	823283	825317	176.2	1762
AT1G03365	RING/U-box superfamily protein	Chr1	826458	827186	93.8	938
AT1G03370	C2 calcium/lipid-binding and GRAM domain containing protein	Chr1	830512	831870	235.8	2358
AT1G03380	HOMOLOG OF YEAST AUTOPHAGY 18 (ATG18) G (ATG18G)	Chr1	835677	836776	307.8	3078
AT1G03400	2-oxoglutarate (2OG) and Fe(II)-dependent oxygenase superfamily protein	Chr1	843302	844282	173.1	1731
AT1G03410	(2A6)	Chr1	846624	848610	201.9	2019
AT1G03430	HISTIDINE-CONTAINING PHOSPHOTRANSFER FACTOR 5 (AHP5)	Chr1	846624	848610	100.3	1003
AT1G03440	Leucine-rich repeat (LRR) family protein	Chr1	852417	853963	283	2830
AT1G03457	RNA-binding (RRM/RBD/RNP motifs) family protein	Chr1	863267	864203	130.7	1307
AT1G03470	NETWORKED 3A (NET3A)	Chr1	867076	867815	121.2	1212
AT1G03475	LESION INITIATION 2 (LIN2)	Chr1	869911	871347	191.4	1914
AT1G03506		Chr1	874835	876008	122.8	1228
AT1G03510	Tetratricopeptide repeat (TPR)-like superfamily protein	Chr1	876905	877665	156.5	1565
AT1G03520	Core-2/I-branching beta-1%2C6-N-acetylglucosaminyltransferase family protein	Chr1	879377	880208	83.2	832
AT1G03530	NUCLEAR ASSEMBLY FACTOR 1 (NAF1)	Chr1	882597	884527	184.8	1848
AT1G03540	Pentatricopeptide repeat (PPR-like) superfamily protein	Chr1	882597	884527	169.5	1695
AT1G03560	Pentatricopeptide repeat (PPR-like) superfamily protein	Chr1	891601	892556	185.7	1857
AT1G03590	Protein phosphatase 2C family protein	Chr1	895587	897553	64	640
AT1G03600	(PSB27)	Chr1	898878	899515	72.1	721
AT1G03610	plant/protein (DUF789)	Chr1	900912	902862	125.3	1253
AT1G03630	PROTOCHLOROPHYLLIDE OXIDOREDUCTASE C (POR C)	Chr1	907635	908439	67	670
AT1G03650	Acyl-CoA N-acyltransferases (NAT) superfamily protein	Chr1	910516	911377	231.9	2319
AT1G03680	THIOREDOXIN M-TYPE 1 (THM1)	Chr1	917091	918979	319.4	3194
AT1G03687	DTW domain-containing protein	Chr1	917091	918979	285.6	2856
AT1G03710	Cystatin/monellin superfamily protein	Chr1	923270	924517	304.1	3041
AT1G03730	pyrroline-5-carboxylate reductase	Chr1	930739	931754	284.9	2849
AT1G03740	Protein kinase superfamily protein	Chr1	933498	934514	120.9	1209
AT1G03750	SWITCH 2 (SWI2)	Chr1	936873	938787	174.5	1745
AT1G03760	Prefoldin chaperone subunit family protein	Chr1	942657	943548	220.5	2205
AT1G03770	RING 1B (RING1B)	Chr1	944475	945417	291.3	2913
AT1G03800	ERF DOMAIN PROTEIN 10 (ERF10)	Chr1	957158	958084	227.5	2275
AT1G03830	guanylate-binding family protein	Chr1	965998	966910	285.9	2859
AT1G03850	GLUTAREDOXIN 13 (GRXS13)	Chr1	977123	977802	113.8	1138
AT1G03860	PROHIBITIN 2 (PHB2)	Chr1	981079	982063	286	2860
AT1G03870	FASCICLIN-LIKE ARABINOOGALACTAN 9 (FLA9)	Chr1	982507	983481	162.1	1621
AT1G03900	ATP-BINDING CASSETTE I18 (ABCI18)	Chr1	991011	992137	239	2390
AT1G03905	ATP-BINDING CASSETTE I19 (ABCI19)	Chr1	993298	994161	151	1510
AT1G03910	CACTIN; CTN	Chr1	995947	996900	233	2330
AT1G03930	DUAL SPECIFICITY KINASE 1 (ADK1)	Chr1	1004714	1005728	258.9	2589
AT1G03960	Calcium-binding EF hand family protein	Chr1	1013603	1014735	144.5	1445
AT1G03970	G-BOX BINDING FACTOR 4 (GBF4)	Chr1	1018010	1019289	200.9	2009
AT1G03980	PHYTOCHELATIN SYNTHASE 2 (PCS2)	Chr1	1021339	1022125	118.4	1184
AT1G04000	hypothetical protein	Chr1	1026745	1029061	260.3	2603
AT1G04010	PHOSPHOLIPID STEROL ACYL TRANSFERASE 1 (PSAT1)	Chr1	1035359	1036376	299.9	2999
AT1G04030	eisosome protein	Chr1	1040374	1041320	114.7	1147
AT1G04040	HAD superfamily%2C subfamily IIIB acid phosphatase	Chr1	1042415	1043936	76	760
AT1G04070	TRANSLOCASE OF OUTER MEMBRANE 22-I (TOM22-I)	Chr1	1050345	1052148	216	2160
AT1G04080	(PRP39)	Chr1	1050345	1052148	183.1	1831
AT1G04090	vacuolar sorting-associated protein (DUF946)	Chr1	1058593	1060696	84.8	848
AT1G04100	INDOLEACETIC ACID-INDUCED PROTEIN 10 (IAA10)	Chr1	1058593	1060696	292.2	2922
AT1G04120	ATP-BINDING CASSETTE C5 (ABCC5)	Chr1	1069519	1071011	234.7	2347
AT1G04130	TETRATRICOPEPTIDE REPEAT 2 (TPR2)	Chr1	1073209	1074259	221.3	2213
AT1G04140	Transducin family protein / WD-40 repeat family protein	Chr1	1079707	1080777	343.5	3435
AT1G04160	MYOSIN XI B (XIB)	Chr1	1095549	1096521	184.2	1842
AT1G04170	EUKARYOTIC TRANSLATION INITIATION FACTOR 2 GAMMA SUBUNIT (EIF2 GAMMA)	Chr1	1096883	1097840	285.9	2859
AT1G04190	TETRATRICOPEPTIDE REPEAT 3 (TPR3)	Chr1	1107850	1108830	270	2700
AT1G04200	dyggve-melchior-clausen syndrome protein	Chr1	1109323	1110336	237.3	2373
AT1G04210	Leucine-rich repeat protein kinase family protein	Chr1	1114264	1115649	314.6	3146
AT1G04220	3-KETOACYL-COA SYNTHASE 2 (KCS2)	Chr1	1121431	1122459	146.4	1464
AT1G04230	rRNA-processing EFG1-like protein (DUF2361)	Chr1	1125355	1126280	264.3	2643
AT1G04240	SHORT HYPOCOTYL 2 (SHY2)	Chr1	1128368	1129510	204.5	2045
AT1G04250	AUXIN RESISTANT 3 (AXR3)	Chr1	1136214	1137607	174	1740
AT1G04260	CAMV MOVEMENT PROTEIN INTERACTING PROTEIN 7 (MPI7)	Chr1	1140497	1141468	165.2	1652
AT1G04270	CYTOSOLIC RIBOSOMAL PROTEIN S15 (RPS15)	Chr1	1141993	1143136	184.3	1843
AT1G04280	P-loop containing nucleoside triphosphate hydrolases superfamily protein	Chr1	1145862	1146645	161.4	1614
AT1G04290	Thioesterase superfamily protein	Chr1	1147649	1148556	267.4	2674
AT1G04295		Chr1	1147649	1148556	267.4	2674
AT1G04300	MUSE13; TRAF1B; TUMOR NECROSIS FACTOR RECEPTOR-ASSOCIATED FACTOR 1B	Chr1	1153614	1154769	214.5	2145
AT1G04310	ETHYLENE RESPONSE SENSOR 2 (ERS2)	Chr1	1156505	1157864	190.6	1906
AT1G04340	HR-like lesion-inducing protein-like protein	Chr1	1164085	1164985	315.2	3152
AT1G04360	ARABIDOPSIS TOXICOS EN LEVADURA 1; ATL1	Chr1	1168109	1168826	78.9	789
AT1G04390	BTB/POZ domain-containing protein	Chr1	1182803	1183860	251.9	2519
AT1G04400	CRYPTOCHROME 2 (CRY2)	Chr1	1187358	1188350	127.7	1277
AT1G04410	CYTOSOLIC-NAD-DEPENDENT MALATE DEHYDROGENASE 1 (c-NAD-MDH1)	Chr1	1190405	1192196	192.6	1926
AT1G04420	NAD(P)-linked oxidoreductase superfamily protein	Chr1	1190405	1192196	150.7	1507
AT1G04430	S-adenosyl-L-methionine-dependent methyltransferases superfamily protein	Chr1	1198096	1199742	96.4	964
AT1G04440	CASEIN KINASE LIKE 13 (CKL13)	Chr1	1202192	1203748	156	1560
AT1G04480	Ribosomal protein L14p/L23e family protein	Chr1	1215893	1217175	361.5	3615
AT1G04510	MOS4-ASSOCIATED COMPLEX 3A (MAC3A)	Chr1	1226414	1227520	348.3	3483
AT1G04520	PLASMODESMATA-LOCATED PROTEIN 2 (PDLP2)	Chr1	1231668	1233170	133.8	1338
AT1G04530	TETRATRICOPEPTIDE REPEAT 4 (TPR4)	Chr1	1235254	1236132	138.5	1385
AT1G04540	Calcium-dependent lipid-binding (CaLB domain) family protein	Chr1	1237780	1239001	85.1	851
AT1G04550	INDOLE-3-ACETIC ACID INDUCIBLE 12 (IAA12)	Chr1	1240348	1241360	151.7	1517
AT1G04555	transmembrane protein	Chr1	1242522	1243385	167.9	1679
AT1G04570	Major facilitator superfamily protein	Chr1	1247820	1248868	221.7	2217
AT1G04580	ALDEHYDE OXIDASE 4 (AO4)	Chr1	1256150	1257679	95.1	951
AT1G04590	PPR containing-like protein	Chr1	1260723	1262389	219.7	2197
AT1G04620	7-HYDROXYMETHYL CHLOROPHYLL A (HMCHL) REDUCTASE (HCAR)	Chr1	1285733	1286663	268.4	2684
AT1G04630	MATERNAL EFFECT EMBRYO ARREST 4 (MEE4)	Chr1	1290416	1292523	219.5	2195
AT1G04635	EMBRYO DEFECTIVE 1687 (EMB1687)	Chr1	1290416	1292523	255.9	2559
AT1G04650	holliday junction resolvase	Chr1	1298168	1299081	253.6	2536
AT1G04690	POTASSIUM CHANNEL BETA SUBUNIT 1 (KAB1)	Chr1	1313390	1314761	355.5	3555
AT1G04700	PB1 domain-containing protein tyrosine kinase	Chr1	1316250	1316884	57.6	576
AT1G04710	PEROXISOMAL 3-KETOACYL-COA THIOLASE 4 (PKT4)	Chr1	1321894	1322533	62.9	629
AT1G04730	CHROMOSOME TRANSMISSION FIDELITY 18 (CTF18)	Chr1	1330226	1331254	180.8	1808
AT1G04750	VESICLE-ASSOCIATED MEMBRANE PROTEIN 721 (VAMP721)	Chr1	1332699	1333617	133.6	1336
AT1G04770	SD!2; SULFUR DEFICIENCY INDUCED 2	Chr1	1336440	1337911	162.8	1628
AT1G04780	Ankyrin repeat family protein	Chr1	1342241	1343788	267.9	2679
AT1G04790	RING/U-box superfamily protein	Chr1	1344952	1345551	94.1	941
AT1G04810	26S proteasome regulatory complex%2C non-ATPase subcomplex%2C Rpn2/Psmd1 subunit	Chr1	1350046	1351061	312.8	3128
AT1G04820	TUBULIN ALPHA-4 CHAIN (TUA4)	Chr1	1356899	1358519	208.1	2081
AT1G04830	Ypt/Rab-GAP domain of gyp1p superfamily protein	Chr1	1361075	1362128	167.8	1678
AT1G04840	Tetratricopeptide repeat (TPR)-like superfamily protein	Chr1	1364125	1365068	177.9	1779
AT1G04850	ubiquitin-associated (UBA)/TS-N domain-containing protein	Chr1	1368003	1368954	225.3	2253
AT1G04860	UBIQUITIN-SPECIFIC PROTEASE 2 (UBP2)	Chr1	1372352	1373201	180.4	1804
AT1G04870	PROTEIN ARGININE METHYLTRANSFERASE 10 (PRMT10)	Chr1	1374740	1375904	277	2770
AT1G04900	NADH dehydrogenase ubiquinone complex I%2C assembly factor-like protein (DUF185)	Chr1	1383693	1384631	242.3	2423
AT1G04910	O-fucosyltransferase family protein	Chr1	1390334	1391400	345.9	3459
AT1G04930	hydroxyproline-rich glycoprotein family protein	Chr1	1398138	1399788	237.6	2376
AT1G04940	TRANSLOCON AT THE INNER ENVELOPE MEMBRANE OF CHLOROPLASTS 20-I (Tic20-I)	Chr1	1398138	1399788	128.1	1281
AT1G04945	HIT-type Zinc finger family protein	Chr1	1398138	1399788	128.1	1281
AT1G04950	TATA BOX ASSOCIATED FACTOR II 59 (TAFII59)	Chr1	1406732	1407659	217.3	2173
AT1G04960	golgin family A protein (DUF1664)	Chr1	1410122	1410875	131.8	1318
AT1G04970	LBR-1	Chr1	1410992	1412150	186.3	1863
AT1G04985	triacylglycerol lipase-like protein	Chr1	1417656	1419008	194.9	1949
AT1G04990	Zinc finger C-x8-C-x5-C-x3-H type family protein	Chr1	1420731	1421733	155.5	1555
AT1G05000	PLANT AND FUNGI ATYPICAL DUAL-SPECI&#64257;CITY PHOSPHATASE 1 (PFA-DSP1)	Chr1	1425437	1426429	262.7	2627
AT1G05010	ETHYLENE-FORMING ENZYME (EFE)	Chr1	1431359	1432884	242.2	2422
AT1G05020	ENTH/ANTH/VHS superfamily protein	Chr1	1436601	1437534	197	1970
AT1G05030	Major facilitator superfamily protein	Chr1	1440572	1441586	314.9	3149
AT1G05055	GENERAL TRANSCRIPTION FACTOR II H2 (GTF2H2)	Chr1	1450103	1451008	159.3	1593
AT1G05060	coiled-coil protein	Chr1	1451758	1452981	140.3	1403
AT1G05070	transmembrane protein%2C putative (DUF1068)	Chr1	1457861	1458829	215.7	2157
AT1G05090	dentin sialophosphoprotein-like protein	Chr1	1462920	1464073	334.1	3341
AT1G05100	MITOGEN-ACTIVATED PROTEIN KINASE KINASE KINASE 18 (MAPKKK18)	Chr1	1469449	1470817	349.9	3499
AT1G05120	Helicase protein with RING/U-box domain-containing protein	Chr1	1475430	1476340	285.9	2859
AT1G05140	Peptidase M50 family protein	Chr1	1482541	1483678	189.5	1895
AT1G05150	Calcium-binding tetratricopeptide family protein	Chr1	1485761	1487046	187	1870
AT1G05160	"CYTOCHROME P450, FAMILY 88, SUBFAMILY A, POLYPEPTIDE 3" (CYP88A3)	Chr1	1490274	1491079	153.2	1532
AT1G05170	Galactosyltransferase family protein	Chr1	1493328	1494324	240.1	2401
AT1G05180	AUXIN RESISTANT 1 (AXR1)	Chr1	1500992	1501985	272.2	2722
AT1G05190	EMBRYO DEFECTIVE 2394 (emb2394)	Chr1	1503224	1503942	180.1	1801
AT1G05205	hexokinase-1 protein	Chr1	1509515	1511043	178.9	1789
AT1G05210	Transmembrane protein 97%2C Putative	Chr1	1509515	1511043	178.7	1787
AT1G05220	Transmembrane protein 97%2C Putative	Chr1	1511804	1512629	150	1500
AT1G05270	TraB family protein	Chr1	1533440	1534588	358.6	3586
AT1G05300	ZINC TRANSPORTER 5 PRECURSOR (ZIP5)	Chr1	1546945	1547939	278.1	2781
AT1G05320	myosin heavy chain%2C embryonic smooth protein	Chr1	1553552	1554383	133.2	1332
AT1G05350	NAD(P)-binding Rossmann-fold superfamily protein	Chr1	1563277	1564289	297.1	2971
AT1G05360	KILLING ME SLOWLY 2 (KMS2)	Chr1	1564407	1565337	262.4	2624
AT1G05370	Sec14p-like phosphatidylinositol transfer family protein	Chr1	1569385	1570033	164.6	1646
AT1G05380	Acyl-CoA N-acyltransferase with RING/FYVE/PHD-type zinc finger protein	Chr1	1576681	1577960	341.9	3419
AT1G05385	LOW PSII ACCUMULATION 19 (LPA19)	Chr1	1582901	1583765	82.6	826
AT1G05400	hypothetical protein	Chr1	1584053	1585171	151.5	1515
AT1G05410	CDPK adapter%2C putative (DUF1423)	Chr1	1587011	1587872	179.8	1798
AT1G05420	OVATE FAMILY PROTEIN 12 (OFP12)	Chr1	1590034	1590764	201.9	2019
AT1G05430	hypothetical protein	Chr1	1594895	1595975	270.4	2704
AT1G05440	C-8 sterol isomerase	Chr1	1597108	1597797	45.6	456
AT1G05460	SILENCING DEFECTIVE (SDE3)	Chr1	1604166	1605151	274.3	2743
AT1G05470	COTYLEDON VASCULAR PATTERN 2 (CVP2)	Chr1	1609690	1611798	103.9	1039
AT1G05490	CHROMATIN REMODELING 31 (chr31)	Chr1	1622526	1623466	134.8	1348
AT1G05500	(NTMC2T2.1)	Chr1	1624716	1625869	322.8	3228
AT1G05520	Sec23/Sec24 protein transport family protein	Chr1	1634390	1635997	355.8	3558
AT1G05570	CALLOSE SYNTHASE 1 (CALS1)	Chr1	1658368	1659585	198.9	1989
AT1G05575	transmembrane protein	Chr1	1661575	1662303	131.9	1319
AT1G05577	UPSTREAM OF FLC protein (DUF966)	Chr1	1663389	1664360	51.1	511
AT1G05590	BETA-HEXOSAMINIDASE 2 (HEXO2)	Chr1	1669279	1670308	223.9	2239
AT1G05600	EMBRYO DEFECTIVE 3101 (EMB3101)	Chr1	1671788	1672782	238.6	2386
AT1G05620	URIDINE-RIBOHYDROLASE 2 (URH2)	Chr1	1679033	1679984	194.9	1949
AT1G05630	INOSITOL-POLYPHOSPHATE 5-PHOSPHATASE 13 (5PTASE13)	Chr1	1682085	1683448	281.5	2815
AT1G05640	Ankyrin repeat family protein	Chr1	1688761	1689985	294.6	2946
AT1G05670	Pentatricopeptide repeat (PPR-like) superfamily protein	Chr1	1700112	1701223	325.7	3257
AT1G05710	basic helix-loop-helix (bHLH) DNA-binding superfamily protein	Chr1	1714942	1716635	135.2	1352
AT1G05720	selenoprotein family protein	Chr1	1718265	1719625	155.3	1553
AT1G05730	FAM136A-like protein (DUF842)	Chr1	1718265	1719625	155.3	1553
AT1G05750	PIGMENT DEFECTIVE 247 (PDE247)	Chr1	1721388	1722314	225.2	2252
AT1G05780	Vacuolar ATPase assembly integral membrane protein VMA21-like domain-containing protein	Chr1	1726535	1727319	109.2	1092
AT1G05785	Got1/Sft2-like vescicle transport protein family	Chr1	1729194	1730735	42.5	425
AT1G05790	lipase class 3 family protein	Chr1	1732681	1733768	255.3	2553
AT1G05805	basic helix-loop-helix (bHLH) DNA-binding superfamily protein	Chr1	1744673	1745662	279.8	2798
AT1G05810	RAB GTPASE HOMOLOG A5E (RABA5E)	Chr1	1748292	1749139	178.1	1781
AT1G05820	SIGNAL PEPTIDE PEPTIDASE-LIKE 5 (SPPL5)	Chr1	1749615	1750144	59.1	591
AT1G05830	TRITHORAX-LIKE PROTEIN 2 (ATX2)	Chr1	1754060	1755499	341.5	3415
AT1G05840	Eukaryotic aspartyl protease family protein	Chr1	1765364	1766417	187.5	1875
AT1G05850	POM-POM1 (POM1)	Chr1	1767931	1769966	80.3	803
AT1G05860	INO80 complex subunit D-like protein	Chr1	1767931	1769966	114.7	1147
AT1G05870	hypothetical protein (DUF1685)	Chr1	1772158	1773448	176.9	1769
AT1G05890	ARIADNE 5 (ARI5)	Chr1	1779236	1780558	353.1	3531
AT1G05900	ENDONUCLEASE III 2 (NTH2)	Chr1	1786721	1787549	269.6	2696
AT1G05910	cell division cycle protein 48-related / CDC48-like protein	Chr1	1790065	1790980	320.1	3201
AT1G05940	CATIONIC AMINO ACID TRANSPORTER 9 (CAT9)	Chr1	1802849	1804186	300.6	3006
AT1G05950	hypothetical protein	Chr1	1806714	1807675	116.5	1165
AT1G05960	ARM repeat superfamily protein	Chr1	1814631	1815663	308.2	3082
AT1G05970	RNA-binding (RRM/RBD/RNP motifs) family protein	Chr1	1816477	1817383	165.6	1656
AT1G06000	UGT89C1	Chr1	1820468	1821820	175.7	1757
AT1G06002		Chr1	1820468	1821820	175.7	1757
AT1G06010	basic leucine zipper/W2 domain protein	Chr1	1822499	1823268	172.2	1722
AT1G06040	SALT TOLERANCE (STO)	Chr1	1828653	1829898	154.5	1545
AT1G06050	ENHANCED DISEASE RESISTANCE-like protein (DUF1336)	Chr1	1831771	1832563	111.5	1115
AT1G06060	LisH and RanBPM domains containing protein	Chr1	1832854	1833551	115.9	1159
AT1G06070	Basic-leucine zipper (bZIP) transcription factor family protein	Chr1	1836717	1837783	288.3	2883
AT1G06080	DELTA 9 DESATURASE 1 (ADS1)	Chr1	1843491	1845523	202.3	2023
AT1G06110	SKP1/ASK-INTERACTING PROTEIN 16 (SKIP16)	Chr1	1854002	1855248	316.8	3168
AT1G06130	GLYOXALASE 2-4 (GLX2-4)	Chr1	1859727	1860869	218.1	2181
AT1G06140	MITOCHONDRIAL EDITING FACTOR 3 (MEF3)	Chr1	1864696	1865645	215.7	2157
AT1G06150	EMBRYO DEFECTIVE 1444 (EMB1444)	Chr1	1867927	1868930	125.1	1251
AT1G06160	OCTADECANOID-RESPONSIVE ARABIDOPSIS AP2/ERF 59 (ORA59)	Chr1	1883073	1883777	100	1000
AT1G06180	MYB DOMAIN PROTEIN 13 (MYB13)	Chr1	1889286	1890336	205	2050
AT1G06190	RHO-N 1 (RHON1)	Chr1	1893417	1894221	133.8	1338
AT1G06200	Peptidase S24/S26A/S26B/S26C family protein	Chr1	1896301	1897891	177	1770
AT1G06210	ENTH/VHS/GAT family protein	Chr1	1896301	1897891	126.1	1261
AT1G06220	MATERNAL EFFECT EMBRYO ARREST 5 (MEE5)	Chr1	1899837	1900820	234.1	2341
AT1G06230	GLOBAL TRANSCRIPTION FACTOR GROUP E4 (GTE4)	Chr1	1906962	1908412	245.5	2455
AT1G06240	diiron containing four-helix bundle family ferritin protein%2C putative (Protein of unknown function DUF455)	Chr1	1910990	1912079	217.1	2171
AT1G06260	Cysteine proteinases superfamily protein	Chr1	1916944	1917698	83.2	832
AT1G06265		Chr1	1916944	1917698	83.2	832
AT1G06270	Pentatricopeptide repeat (PPR) superfamily protein	Chr1	1918805	1919881	205	2050
AT1G06290	ACYL-COA OXIDASE 3 (ACX3)	Chr1	1922217	1923270	252.6	2526
AT1G06310	ACYL-COA OXIDASE 6 (ACX6)	Chr1	1926682	1927319	77.4	774
AT1G06380	Ribosomal protein L1p/L10e family	Chr1	1944336	1946011	230.9	2309
AT1G06390	GSK3/SHAGGY-LIKE PROTEIN KINASE 1 (GSK1)	Chr1	1946694	1947672	195.3	1953
AT1G06400	(ARA-2)	Chr1	1951866	1952961	248.4	2484
AT1G06410	TREHALOSE-PHOSPHATASE/SYNTHASE 7 (TPS7)	Chr1	1954708	1955675	207.8	2078
AT1G06420	DNA ligase-like protein	Chr1	1958939	1959516	60.5	605
AT1G06430	FTSH PROTEASE 8 (ftsh8)	Chr1	1962283	1963065	89.1	891
AT1G06440	Ubiquitin carboxyl-terminal hydrolase family protein	Chr1	1963889	1964927	73.6	736
AT1G06450	Polynucleotidyl transferase%2C ribonuclease H-like superfamily protein	Chr1	1965782	1966980	117.1	1171
AT1G06460	ALPHA-CRYSTALLIN DOMAIN 32.1 (ACD32.1)	Chr1	1969061	1970538	79.3	793
AT1G06470	Nucleotide/sugar transporter family protein	Chr1	1969061	1970538	154.5	1545
AT1G06475	transmembrane protein	Chr1	1973817	1974418	64.2	642
AT1G06500	hypothetical protein	Chr1	1989369	1990153	174.1	1741
AT1G06510	forkhead-associated domain protein	Chr1	1991436	1993060	186.9	1869
AT1G06515	SMALL SUBUNIT OF SPT A; SSSPTA	Chr1	1991436	1993060	184.7	1847
AT1G06530	PEROXISOMAL AND MITOCHONDRIAL DIVISION FACTOR 2 (PMD2)	Chr1	2001312	2002778	260.5	2605
AT1G06550	ATP-dependent caseinolytic (Clp) protease/crotonase family protein	Chr1	2006050	2007242	134.9	1349
AT1G06560	NOP2C	Chr1	2007502	2008420	188.1	1881
AT1G06570	PHYTOENE DESATURATION 1 (PDS1)	Chr1	2012153	2013650	210.4	2104
AT1G06580	PENTATRICOPEPTIDE REPEAT 1; PPR1	Chr1	2015304	2016240	219.9	2199
AT1G06590	anaphase-promoting complex subunit	Chr1	2023800	2024791	215.4	2154
AT1G06620	2-oxoglutarate (2OG) and Fe(II)-dependent oxygenase superfamily protein	Chr1	2025490	2026355	150.2	1502
AT1G06630	F-box/RNI-like superfamily protein	Chr1	2027671	2028481	140.8	1408
AT1G06650	2-oxoglutarate (2OG) and Fe(II)-dependent oxygenase superfamily protein	Chr1	2035756	2036920	180	1800
AT1G06660	JASON (JASON)	Chr1	2039666	2041288	66.9	669
AT1G06670	NUCLEAR DEIH-BOXHELICASE (NIH)	Chr1	2039666	2041288	252.4	2524
AT1G06690	NAD(P)-linked oxidoreductase superfamily protein	Chr1	2051389	2052276	240	2400
AT1G06700	Protein kinase superfamily protein	Chr1	2054302	2055431	240.5	2405
AT1G06710	Tetratricopeptide repeat (TPR)-like superfamily protein	Chr1	2059442	2060520	310.4	3104
AT1G06720	P-loop containing nucleoside triphosphate hydrolases superfamily protein	Chr1	2066422	2068393	196.9	1969
AT1G06730	pfkB-like carbohydrate kinase family protein	Chr1	2066422	2068393	199.1	1991
AT1G06760	H1.1; HISTONE 1.1	Chr1	2076281	2077885	245.6	2456
AT1G06770	DREB2A-INTERACTING PROTEIN 1 (DRIP1)	Chr1	2081130	2082014	156.5	1565
AT1G06780	GALACTURONOSYLTRANSFERASE 6 (GAUT6)	Chr1	2083303	2084321	189.3	1893
AT1G06790	RNA polymerase Rpb7 N-terminal domain-containing protein	Chr1	2087126	2087913	122	1220
AT1G06800	PHOSPHOLIPASE A I GAMMA 1 (PLA-I\{gamma\}1)	Chr1	2090035	2091570	227.3	2273
AT1G06820	CAROTENOID ISOMERASE (CRTISO)	Chr1	2095558	2097002	272.6	2726
AT1G06840	Leucine-rich repeat protein kinase family protein	Chr1	2101881	2103445	189	1890
AT1G06850	BASIC LEUCINE-ZIPPER 52 (bZIP52)	Chr1	2105055	2106153	114.8	1148
AT1G06870	PLASTIDIC TYPE I SIGNAL PEPTIDASE 2A (PLSP2A)	Chr1	2108477	2109796	175	1750
AT1G06890	UDP-XYLOSE TRANSPORTER3; UXT3	Chr1	2113570	2114721	261.2	2612
AT1G06900	Insulinase (Peptidase family M16) family protein	Chr1	2119860	2122052	228.6	2286
AT1G06910	TRF-LIKE 7 (TRFL7)	Chr1	2119860	2122052	260.1	2601
AT1G06950	TRANSLOCON AT THE INNER ENVELOPE MEMBRANE OF CHLOROPLASTS 110 (TIC110)	Chr1	2134464	2136481	301.9	3019
AT1G06960	RNA-binding (RRM/RBD/RNP motifs) family protein	Chr1	2134464	2136481	168.6	1686
AT1G06980	6%2C7-dimethyl-8-ribityllumazine synthase	Chr1	2142840	2143902	288.3	2883
AT1G07000	EXOCYST SUBUNIT EXO70 FAMILY PROTEIN B2 (EXO70B2)	Chr1	2151182	2152589	182	1820
AT1G07010	SHEWENELLA-LIKE PROTEIN PHOSPHATASE 1 (SLP1)	Chr1	2152823	2153476	115.9	1159
AT1G07020	hypothetical protein	Chr1	2155187	2156060	107.3	1073
AT1G07030	Mitochondrial substrate carrier family protein	Chr1	2159489	2160884	150.1	1501
AT1G07040	plant/protein	Chr1	2162093	2163314	202.4	2024
AT1G07070	Ribosomal protein L35Ae family protein	Chr1	2167890	2169239	217.6	2176
AT1G07080	Thioredoxin superfamily protein	Chr1	2169845	2170903	180.5	1805
AT1G07090	LIGHT SENSITIVE HYPOCOTYLS 6 (LSH6)	Chr1	2173789	2175018	252.3	2523
AT1G07110	"FRUCTOSE-2,6-BISPHOSPHATASE" (F2KP)	Chr1	2183174	2185052	235.5	2355
AT1G07119		Chr1	2183174	2185052	124.3	1243
AT1G07128		Chr1	2187695	2188529	157.4	1574
AT1G07130	(STN1)	Chr1	2187695	2188529	157.4	1574
AT1G07135	glycine-rich protein	Chr1	2190084	2190641	81	810
AT1G07140	(SIRANBP)	Chr1	2192712	2193947	171.6	1716
AT1G07150	MITOGEN-ACTIVATED PROTEIN KINASE KINASE KINASE 13 (MAPKKK13)	Chr1	2194563	2195795	142.8	1428
AT1G07160	Protein phosphatase 2C family protein	Chr1	2199189	2199770	61.3	613
AT1G07170	PHF5-like protein	Chr1	2199961	2200965	260.2	2602
AT1G07200	Double Clp-N motif-containing P-loop nucleoside triphosphate hydrolases superfamily protein	Chr1	2211033	2212608	237.4	2374
AT1G07210	Ribosomal protein S18	Chr1	2215161	2215991	145.2	1452
AT1G07220	O-glucosyltransferase rumi-like protein (DUF821)	Chr1	2218339	2219459	104	1040
AT1G07230	NON-SPECIFIC PHOSPHOLIPASE C1 (NPC1)	Chr1	2221584	2222947	72.3	723
AT1G07240	UDP-GLUCOSYL TRANSFERASE 71C5 (UGT71C5)	Chr1	2223862	2224514	45.6	456
AT1G07250	UDP-GLUCOSYL TRANSFERASE 71C4 (UGT71C4)	Chr1	2225935	2227191	60.1	601
AT1G07260	UDP-GLUCOSYL TRANSFERASE 71C3 (UGT71C3)	Chr1	2227741	2229183	86.2	862
AT1G07270	Cell division control%2C Cdc6	Chr1	2232387	2233122	131.6	1316
AT1G07280	Tetratricopeptide repeat (TPR)-like superfamily protein	Chr1	2238115	2239895	220.2	2202
AT1G07310	Calcium-dependent lipid-binding (CaLB domain) family protein	Chr1	2247563	2250140	150	1500
AT1G07320	RIBOSOMAL PROTEIN L4 (RPL4)	Chr1	2247563	2250140	169.5	1695
AT1G07350	SERINE/ARGININE RICH-LIKE PROTEIN 45A (SR45a)	Chr1	2259323	2260261	178.9	1789
AT1G07360	MOS4-ASSOCIATED COMPLEX SUBUNIT 5A (MAC5A)	Chr1	2262062	2263909	216.2	2162
AT1G07370	PROLIFERATING CELLULAR NUCLEAR ANTIGEN 1 (PCNA1)	Chr1	2262062	2263909	176.4	1764
AT1G07400	HSP20-like chaperones superfamily protein	Chr1	2274930	2275712	174.2	1742
AT1G07410	RAB GTPASE HOMOLOG A2B (RABA2b)	Chr1	2275948	2276708	142.2	1422
AT1G07420	STEROL 4-ALPHA-METHYL-OXIDASE 2-1 (SMO2-1)	Chr1	2277700	2278686	169.8	1698
AT1G07430	HIGHLY ABA-INDUCED PP2C GENE 2 (HAI2)	Chr1	2281320	2282833	150.5	1505
AT1G07470	Transcription factor IIA%2C alpha/beta subunit	Chr1	2291252	2292352	314.4	3144
AT1G07480	Transcription factor IIA%2C alpha/beta subunit	Chr1	2298556	2299669	315.2	3152
AT1G07500	hypothetical protein	Chr1	2304555	2305130	88.4	884
AT1G07510	FTSH PROTEASE 10 (ftsh10)	Chr1	2305364	2306376	335.4	3354
AT1G07520	GRAS family transcription factor	Chr1	2310667	2312205	194.2	1942
AT1G07530	SCARECROW-LIKE 14 (SCL14)	Chr1	2315197	2316559	228	2280
AT1G07570	(APK1A)	Chr1	2332146	2333658	187.2	1872
AT1G07590	Tetratricopeptide repeat (TPR)-like superfamily protein	Chr1	2337392	2339446	196.3	1963
AT1G07600	METALLOTHIONEIN 1A (MT1A)	Chr1	2337392	2339446	96.7	967
AT1G07615	OBG A-1	Chr1	2343536	2344499	308.6	3086
AT1G07630	POL-LIKE 5 (PLL5)	Chr1	2348947	2350886	283.1	2831
AT1G07650	Leucine-rich repeat transmembrane protein kinase	Chr1	2363977	2364829	220	2200
AT1G07660	Histone superfamily protein	Chr1	2368789	2369797	227.1	2271
AT1G07670	ENDOMEMBRANE-TYPE CA-ATPASE 4 (ECA4)	Chr1	2373230	2374719	269.4	2694
AT1G07700	Thioredoxin superfamily protein	Chr1	2379510	2380276	190.4	1904
AT1G07705	NEGATIVE ON TATA LESS2A; NOT2A	Chr1	2381504	2382440	256.6	2566
AT1G07720	3-KETOACYL-COA SYNTHASE 3 (KCS3)	Chr1	2391072	2392142	41.5	415
AT1G07725	EXOCYST SUBUNIT EXO70 FAMILY PROTEIN H6 (EXO70H6)	Chr1	2395353	2396942	179.6	1796
AT1G07728		Chr1	2395353	2396942	179.6	1796
AT1G07740	Tetratricopeptide repeat (TPR)-like superfamily protein	Chr1	2399613	2400625	144	1440
AT1G07745	HOMOLOG OF RAD51 D (RAD51D)	Chr1	2402179	2403002	150.6	1506
AT1G07750	RmlC-like cupins superfamily protein	Chr1	2405054	2406019	139.1	1391
AT1G07770	RIBOSOMAL PROTEIN S15A (RPS15A)	Chr1	2407558	2409522	44.4	444
AT1G07790	(HTB1)	Chr1	2412906	2413899	125.4	1254
AT1G07810	ER-TYPE CA2+-ATPASE 1 (ECA1)	Chr1	2416173	2416870	103.7	1037
AT1G07820	Histone superfamily protein	Chr1	2421046	2423051	182.1	1821
AT1G07830	ribosomal protein L29 family protein	Chr1	2421046	2423051	198	1980
AT1G07840	Sas10/Utp3/C1D family	Chr1	2423963	2424716	131.2	1312
AT1G07870	Protein kinase superfamily protein	Chr1	2430497	2432152	285.6	2856
AT1G07890	ASCORBATE PEROXIDASE 1 (APX1)	Chr1	2437314	2439275	232.5	2325
AT1G07910	RNALIGASE (RNL)	Chr1	2445430	2447000	236.2	2362
AT1G07920	GTP binding Elongation factor Tu family protein	Chr1	2454760	2456015	219.3	2193
AT1G07930	GTP binding Elongation factor Tu family protein	Chr1	2458146	2459530	236.8	2368
AT1G07940	GTP binding Elongation factor Tu family protein	Chr1	2464370	2465578	187.7	1877
AT1G07950	(MED22B)	Chr1	2466251	2467787	200.3	2003
AT1G07960	PDI-LIKE 5-1 (PDIL5-1)	Chr1	2466251	2467787	131.9	1319
AT1G07970	cytochrome B561%2C amino-terminal protein	Chr1	2471908	2472742	223.8	2238
AT1G07980	"NUCLEAR FACTOR Y, SUBUNIT C10" (NF-YC10)	Chr1	2474106	2475031	197.3	1973
AT1G07990	SIT4 phosphatase-associated family protein	Chr1	2477020	2478151	245.9	2459
AT1G08000	GATA TRANSCRIPTION FACTOR 10 (GATA10)	Chr1	2483759	2485165	213.7	2137
AT1G08010	GATA TRANSCRIPTION FACTOR 11 (GATA11)	Chr1	2486897	2488064	182.2	1822
AT1G08030	TYROSYLPROTEIN SULFOTRANSFERASE (TPST)	Chr1	2492115	2493427	315.2	3152
AT1G08040	trimethylguanosine synthase (DUF707)	Chr1	2497679	2498772	220.6	2206
AT1G08050	Zinc finger (C3HC4-type RING finger) family protein	Chr1	2500461	2501535	244.6	2446
AT1G08060	MORPHEUS MOLECULE (MOM)	Chr1	2510290	2511256	340.3	3403
AT1G08070	ORGANELLE TRANSCRIPT PROCESSING 82 (OTP82)	Chr1	2515673	2516756	308.8	3088
AT1G08110	ATGLYI2; GLYOXALASE12	Chr1	2535159	2536174	347.5	3475
AT1G08125	S-adenosyl-L-methionine-dependent methyltransferases superfamily protein	Chr1	2541601	2542444	200.2	2002
AT1G08130	DNA LIGASE 1 (LIG1)	Chr1	2546709	2548055	353.9	3539
AT1G08180	cyclin-dependent kinase inhibitor	Chr1	2564261	2565235	226	2260
AT1G08190	VACUOLAR PROTEIN SORTING 41 (VPS41)	Chr1	2567342	2568406	311.5	3115
AT1G08200	UDP-D-APIOSE/UDP-D-XYLOSE SYNTHASE 2 (AXS2)	Chr1	2575649	2576868	246.7	2467
AT1G08210	Eukaryotic aspartyl protease family protein	Chr1	2579819	2580790	194.5	1945
AT1G08220	ATPase complex subunit	Chr1	2582542	2583453	225	2250
AT1G08230	Transmembrane amino acid transporter family protein	Chr1	2586141	2586678	49.1	491
AT1G08250	AROGENATE DEHYDRATASE 6 (ADT6)	Chr1	2588952	2590483	210.9	2109
AT1G08260	TILTED 1 (TIL1)	Chr1	2590684	2591520	183.7	1837
AT1G08270	vacuolar protein sorting-associated protein	Chr1	2606632	2607592	153.9	1539
AT1G08280	GALT29A; GLYCOSYLTRANSFERASE 29A	Chr1	2607948	2609108	222.5	2225
AT1G08290	WIP DOMAIN PROTEIN 3 (WIP3)	Chr1	2612357	2613218	109.3	1093
AT1G08300	NO VEIN-LIKE (NVL)	Chr1	2614861	2615957	236.9	2369
AT1G08315	ARM repeat superfamily protein	Chr1	2620161	2621702	292.1	2921
AT1G08350	Endomembrane protein 70 protein family	Chr1	2635037	2636748	191.3	1913
AT1G08360	Ribosomal protein L1p/L10e family	Chr1	2635037	2636748	172.5	1725
AT1G08370	DECAPPING 1 (DCP1)	Chr1	2638092	2639089	169.6	1696
AT1G08390	recQ-mediated instability-like protein	Chr1	2642100	2642758	113.7	1137
AT1G08400	RINT-1 / TIP-1 family	Chr1	2645091	2647082	130.4	1304
AT1G08410	P-loop containing nucleoside triphosphate hydrolases superfamily protein	Chr1	2645091	2647082	105.6	1056
AT1G08420	BRI1 SUPPRESSOR 1 (BSU1)-LIKE 2 (BSL2)	Chr1	2649634	2650860	178.5	1785
AT1G08430	ALUMINUM-ACTIVATED MALATE TRANSPORTER 1 (ALMT1)	Chr1	2658687	2660084	105.7	1057
AT1G08450	CALRETICULIN 3 (CRT3)	Chr1	2670944	2671950	228.4	2284
AT1G08460	HISTONE DEACETYLASE 8 (HDA08)	Chr1	2672302	2673453	211.5	2115
AT1G08465	YABBY2 (YAB2)	Chr1	2675839	2676535	70.3	703
AT1G08470	STRICTOSIDINE SYNTHASE-LIKE 3 (SSL3)	Chr1	2682970	2685050	189.8	1898
AT1G08480	SUCCINATE DEHYDROGENASE 6 (SDH6)	Chr1	2682970	2685050	175.8	1758
AT1G08490	CHLOROPLASTIC NIFS-LIKE CYSTEINE DESULFURASE (CPNIFS)	Chr1	2687761	2688680	175.2	1752
AT1G08510	FATTY ACYL-ACP THIOESTERASES B (FATB)	Chr1	2692890	2694342	190.3	1903
AT1G08520	ALBINA 1 (ALB1)	Chr1	2696345	2697346	174.6	1746
AT1G08530	chitinase-like protein	Chr1	2700966	2702011	203.1	2031
AT1G08540	RNAPOLYMERASE SIGMA SUBUNIT 2 (SIG2)	Chr1	2703228	2704055	211.1	2111
AT1G08550	NON-PHOTOCHEMICAL QUENCHING 1 (NPQ1)	Chr1	2706862	2707661	152	1520
AT1G08570	ATYPICAL CYS HIS RICH THIOREDOXIN 4 (ACHT4)	Chr1	2712826	2714133	210.1	2101
AT1G08580	hypothetical protein	Chr1	2715606	2716533	236	2360
AT1G08590	ATPXL1; PHLOEM INTERCALATED WITH XYLEM-LIKE 1; PXL1; PXY-LIKE1	Chr1	2720938	2722118	287.5	2875
AT1G08592		Chr1	2720938	2722118	287.5	2875
AT1G08600	(ATRX)	Chr1	2723608	2724561	261.7	2617
AT1G08610	Pentatricopeptide repeat (PPR) superfamily protein	Chr1	2734919	2735937	249.1	2491
AT1G08620	(PKDM7D)	Chr1	2736720	2737795	213	2130
AT1G08640	CHLOROPLAST J-LIKE DOMAIN 1 (CJD1)	Chr1	2750445	2751404	224.2	2242
AT1G08650	PHOSPHOENOLPYRUVATE CARBOXYLASE KINASE 1 (PPCK1)	Chr1	2752028	2753440	252.9	2529
AT1G08660	MALE GAMETOPHYTE DEFECTIVE 2 (MGP2)	Chr1	2758928	2759943	297.3	2973
AT1G08680	ARF GAP-LIKE ZINC FINGER-CONTAINING PROTEIN ZIGA4 (ZIGA4)	Chr1	2762460	2763534	303.9	3039
AT1G08700	PRESENILIN-1 (PS1)	Chr1	2770472	2772503	177.3	1773
AT1G08710	F-box family protein	Chr1	2770472	2772503	172.9	1729
AT1G08720	ENHANCED DISEASE RESISTANCE 1 (EDR1)	Chr1	2773906	2775053	177.3	1773
AT1G08750	ATGPI8; GPI8	Chr1	2800879	2801832	282.7	2827
AT1G08760	GPI-anchored adhesin-like protein%2C putative (DUF936)	Chr1	2805162	2806296	171.8	1718
AT1G08770	PRENYLATED RAB ACCEPTOR 1.E (PRA1.E)	Chr1	2808769	2809801	191.2	1912
AT1G08780	ABI3-INTERACTING PROTEIN 3 (AIP3)	Chr1	2810535	2811338	201.3	2013
AT1G08800	MYOB1; MYOSIN BINDING PROTEIN 1	Chr1	2816442	2817979	282	2820
AT1G08820	VAMP/SYNAPTOBREVIN-ASSOCIATED PROTEIN 27-2 (VAP27-2)	Chr1	2824278	2825468	258.1	2581
AT1G08830	COPPER/ZINC SUPEROXIDE DISMUTASE 1 (CSD1)	Chr1	2826960	2828228	253.6	2536
AT1G08845	Ribosomal L18p/L5e family protein	Chr1	2837998	2839866	305.6	3056
AT1G08880	(H2AXA)	Chr1	2846638	2847972	304.8	3048
AT1G08890	Major facilitator superfamily protein	Chr1	2848198	2848988	116	1160
AT1G08910	zinc ion binding protein	Chr1	2856113	2857221	183.5	1835
AT1G08920	ERD (EARLY RESPONSE TO DEHYDRATION) SIX-LIKE 1 (ESL1)	Chr1	2867245	2869132	258.9	2589
AT1G08930	EARLY RESPONSE TO DEHYDRATION 6 (ERD6)	Chr1	2873443	2875148	172.5	1725
AT1G08940	Phosphoglycerate mutase family protein	Chr1	2877572	2878347	90.3	903
AT1G08960	CATION EXCHANGER 11 (CAX11)	Chr1	2879579	2880770	142	1420
AT1G08970	"NUCLEAR FACTOR Y, SUBUNIT C9" (NF-YC9)	Chr1	2882479	2883426	111.8	1118
AT1G08980	AMIDASE 1 (AMI1)	Chr1	2884434	2884987	48.5	485
AT1G09000	NPK1-RELATED PROTEIN KINASE 1 (NP1)	Chr1	2890915	2891858	291.4	2914
AT1G09010	glycoside hydrolase family 2 protein	Chr1	2898336	2899560	308	3080
AT1G09020	HOMOLOG OF YEAST SUCROSE NONFERMENTING 4 (SNF4)	Chr1	2903883	2905015	356.3	3563
AT1G09040	arginine-glutamic acid dipeptide repeat protein	Chr1	2911170	2912188	258.9	2589
AT1G09060	JMJ24	Chr1	2924989	2925891	178.2	1782
AT1G09070	SOYBEAN GENE REGULATED BY COLD-2 (SRC2)	Chr1	2927562	2928954	223	2230
AT1G09100	26S PROTEASOME AAA-ATPASE SUBUNIT RPT5B (RPT5B)	Chr1	2938637	2939485	218.4	2184
AT1G09130	ATP-dependent caseinolytic (Clp) protease/crotonase family protein	Chr1	2941410	2942415	178	1780
AT1G09140	SERINE/ARGININE-RICH PROTEIN SPLICING FACTOR 30 (SR30)	Chr1	2945071	2946895	194.6	1946
AT1G09150	pseudouridine synthase and archaeosine transglycosylase (PUA) domain-containing protein	Chr1	2945071	2946895	196.6	1966
AT1G09160	Protein phosphatase 2C family protein	Chr1	2954764	2955881	336.2	3362
AT1G09190	Tetratricopeptide repeat (TPR)-like superfamily protein	Chr1	2966883	2967829	205.7	2057
AT1G09195	Ppx-GppA phosphatase	Chr1	2970823	2972294	140.9	1409
AT1G09200	Histone superfamily protein	Chr1	2970823	2972294	121.3	1213
AT1G09210	CALRETICULIN 1B (CRT1b)	Chr1	2975168	2976887	162.9	1629
AT1G09220	Pentatricopeptide repeat (PPR) superfamily protein	Chr1	2978824	2979381	40.8	408
AT1G09230	RNA-binding (RRM/RBD/RNP motifs) family protein	Chr1	2981874	2982797	300.9	3009
AT1G09250	basic helix-loop-helix (bHLH) DNA-binding superfamily protein	Chr1	2989162	2990416	302.8	3028
AT1G09270	IMPORTIN ALPHA ISOFORM 4 (IMPA-4)	Chr1	2994217	2995357	305.2	3052
AT1G09280	rhodanese-like domain protein	Chr1	3000602	3001575	236.7	2367
AT1G09300	ATICP55	Chr1	3003087	3004485	225.2	2252
AT1G09320	agenet domain-containing protein	Chr1	3011306	3012473	227.6	2276
AT1G09330	golgi apparatus membrane protein-like protein ECHIDNA protein	Chr1	3014352	3015973	158.3	1583
AT1G09340	CHLOROPLAST RNA BINDING (CRB)	Chr1	3014352	3015973	104.2	1042
AT1G09390	GDSL-like Lipase/Acylhydrolase superfamily protein	Chr1	3031130	3031617	59.1	591
AT1G09420	GLUCOSE-6-PHOSPHATE DEHYDROGENASE 4 (G6PD4)	Chr1	3041054	3043006	179.7	1797
AT1G09430	ATP-CITRATE LYASE A-3 (ACLA-3)	Chr1	3041054	3043006	224.3	2243
AT1G09450	HASPIN-RELATED GENE (Haspin)	Chr1	3048940	3049760	100.9	1009
AT1G09460	Carbohydrate-binding X8 domain superfamily protein	Chr1	3053730	3055384	169.1	1691
AT1G09490	NAD(P)-binding Rossmann-fold superfamily protein	Chr1	3063977	3065100	167.3	1673
AT1G09520	hypothetical protein	Chr1	3070814	3072273	345.9	3459
AT1G09530	PHYTOCHROME INTERACTING FACTOR 3 (PIF3)	Chr1	3076474	3077148	65.8	658
AT1G09540	MYB DOMAIN PROTEIN 61 (MYB61)	Chr1	3086107	3087750	201.6	2016
AT1G09560	GERMIN-LIKE PROTEIN 5 (GLP5)	Chr1	3093697	3094883	336.2	3362
AT1G09570	PHYTOCHROME A (PHYA)	Chr1	3099326	3100678	136.8	1368
AT1G09575	calcium uniporter-like protein (DUF607)	Chr1	3101944	3103018	93.6	936
AT1G09580	emp24/gp25L/p24 family/GOLD family protein	Chr1	3104519	3105212	112.3	1123
AT1G09590	Translation protein SH3-like family protein	Chr1	3106392	3107427	172.2	1722
AT1G09620	ATP binding/leucine-tRNA ligases/aminoacyl-tRNA ligase	Chr1	3115569	3116801	186.4	1864
AT1G09630	RAB GTPASE 11C (RAB11c)	Chr1	3118971	3120752	109.2	1092
AT1G09640	Translation elongation factor EF1B%2C gamma chain	Chr1	3118971	3120752	117.5	1175
AT1G09645	transmembrane protein	Chr1	3122907	3123823	152.1	1521
AT1G09650	F-box and associated interaction domains-containing protein	Chr1	3125809	3126624	48.9	489
AT1G09660	RNA-binding KH domain-containing protein	Chr1	3130112	3131150	257.6	2576
AT1G09680	Pentatricopeptide repeat (PPR) superfamily protein	Chr1	3135047	3136053	157.8	1578
AT1G09690	Translation protein SH3-like family protein	Chr1	3136711	3137614	152.5	1525
AT1G09700	HYPONASTIC LEAVES 1 (HYL1)	Chr1	3139531	3140359	138.5	1385
AT1G09710	Homeodomain-like superfamily protein	Chr1	3140807	3141600	167	1670
AT1G09730	ARABIDOPSIS SUMO PROTEASE 1; ASP1	Chr1	3153548	3155370	272.2	2722
AT1G09740	Adenine nucleotide alpha hydrolases-like superfamily protein	Chr1	3153548	3155370	307.2	3072
AT1G09760	U2 SMALL NUCLEAR RIBONUCLEOPROTEIN A (U2A')	Chr1	3160958	3162664	274.8	2748
AT1G09770	CELL DIVISION CYCLE 5 (CDC5)	Chr1	3160958	3162664	235.5	2355
AT1G09780	2,3-BIPHOSPHOGLYCERATE-INDEPENDENT PHOSPHOGLYCERATE MUTASE 1 (iPGAM1)	Chr1	3166499	3168037	271.5	2715
AT1G09794	Cox19 family protein (CHCH motif)	Chr1	3172000	3172812	185.6	1856
AT1G09795	ATP PHOSPHORIBOSYL TRANSFERASE 2 (ATP-PRT2)	Chr1	3173345	3174506	322.5	3225
AT1G09800	Pseudouridine synthase family protein	Chr1	3179659	3180548	292.2	2922
AT1G09810	EVOLUTIONARILY CONSERVED C-TERMINAL REGION 11 (ECT11)	Chr1	3183376	3184278	154.7	1547
AT1G09812	multidrug resistance protein	Chr1	3187537	3188577	106.9	1069
AT1G09815	POLYMERASE DELTA 4 (POLD4)	Chr1	3189290	3190217	160	1600
AT1G09820	Pentatricopeptide repeat (PPR-like) superfamily protein	Chr1	3191727	3192583	133.2	1332
AT1G09830	PURINE BIOSYNTHESIS 2 (PUR2)	Chr1	3194072	3195069	177.6	1776
AT1G09840	SHAGGY-LIKE PROTEIN KINASE 41 (SK41)	Chr1	3198956	3200333	204.3	2043
AT1G09850	XYLEM BARK CYSTEINE PEPTIDASE 3 (XBCP3)	Chr1	3201759	3202626	182	1820
AT1G09870	histidine acid phosphatase family protein	Chr1	3205588	3206542	271.7	2717
AT1G09900	Pentatricopeptide repeat (PPR-like) superfamily protein	Chr1	3217817	3218785	321.7	3217
AT1G09910	Rhamnogalacturonate lyase family protein	Chr1	3223807	3224789	251.6	2516
AT1G09920	TRAF-type zinc finger-like protein	Chr1	3226095	3227189	286.2	2862
AT1G09940	(HEMA2)	Chr1	3238333	3239548	265.7	2657
AT1G09950	RESPONSE TO ABA AND SALT 1 (RAS1)	Chr1	3240668	3241572	161.1	1611
AT1G09960	SUCROSE TRANSPORTER 4 (SUT4)	Chr1	3244098	3245434	224.7	2247
AT1G09970	(LRR XI-23)	Chr1	3252206	3255314	152.9	1529
AT1G09980	Putative serine esterase family protein	Chr1	3260569	3261634	134.4	1344
AT1G09995	DNA repair DEAD helicase RAD3/XP-D subfamily protein	Chr1	3262868	3264871	152	1520
AT1G10000	Ribonuclease H-like superfamily protein	Chr1	3262868	3264871	204.3	2043
AT1G10020	formin-like protein (DUF1005)	Chr1	3270032	3272124	146.6	1466
AT1G10030	HOMOLOG OF YEAST ERGOSTEROL28 (ERG28)	Chr1	3273807	3274488	73.5	735
AT1G10040	alpha/beta-Hydrolases superfamily protein	Chr1	3277780	3279936	234.7	2347
AT1G10050	glycosyl hydrolase family 10 protein / carbohydrate-binding domain-containing protein	Chr1	3277780	3279936	186.1	1861
AT1G10090	Early-responsive to dehydration stress protein (ERD4)	Chr1	3295359	3296253	189.5	1895
AT1G10095	Protein prenylyltransferase superfamily protein	Chr1	3299587	3300748	218.8	2188
AT1G10120	CIB4; CRY2-INTERACTING BHLH 4	Chr1	3304981	3306732	261.9	2619
AT1G10130	ENDOPLASMIC RETICULUM-TYPE CALCIUM-TRANSPORTING ATPASE 3 (ECA3)	Chr1	3310769	3311756	343.5	3435
AT1G10140	Uncharacterized conserved protein UCP031279	Chr1	3322471	3323588	112.6	1126
AT1G10150	Carbohydrate-binding protein	Chr1	3325843	3327382	75.1	751
AT1G10180	LOW protein: exocyst complex component-like protein	Chr1	3340822	3341754	195.8	1958
AT1G10200	WLIM1 (WLIM1)	Chr1	3346547	3347961	258.6	2586
AT1G10210	MITOGEN-ACTIVATED PROTEIN KINASE 1 (MPK1)	Chr1	3349131	3350065	135.7	1357
AT1G10230	SKP1-LIKE 18 (SK18)	Chr1	3355429	3356470	256.6	2566
AT1G10240	FAR1-RELATED SEQUENCE 11 (FRS11)	Chr1	3359095	3359868	98.6	986
AT1G10270	GLUTAMINE-RICH PROTEIN 23 (GRP23)	Chr1	3363338	3364621	161.1	1611
AT1G10280	Core-2/I-branching beta-1%2C6-N-acetylglucosaminyltransferase family protein	Chr1	3367970	3369194	153.1	1531
AT1G10290	DYNAMIN-LIKE PROTEIN 6 (ADL6)	Chr1	3370327	3371427	246	2460
AT1G10310	NAD(P)-binding Rossmann-fold superfamily protein	Chr1	3383283	3384123	189.5	1895
AT1G10320	Zinc finger C-x8-C-x5-C-x3-H type family protein	Chr1	3387448	3389450	152.3	1523
AT1G10330	Tetratricopeptide repeat (TPR)-like superfamily protein	Chr1	3387448	3389450	163.6	1636
AT1G10350	DNAJ heat shock family protein	Chr1	3393829	3395216	339.7	3397
AT1G10390	DRA2; DRACULA2	Chr1	3411942	3413009	331.7	3317
AT1G10410	CW14 protein (DUF1336)	Chr1	3418057	3419674	249.5	2495
AT1G10417	RUN/FYVE domain protein	Chr1	3424370	3425600	87.2	872
AT1G10430	PROTEIN PHOSPHATASE 2A-2 (PP2A-2)	Chr1	3429559	3430748	203.9	2039
AT1G10450	SIN3-LIKE 6 (SNL6)	Chr1	3431623	3432794	224.1	2241
AT1G10460	GERMIN-LIKE PROTEIN 7 (GLP7)	Chr1	3439504	3440380	226.7	2267
AT1G10470	RESPONSE REGULATOR 4 (ARR4)	Chr1	3442536	3444009	236.7	2367
AT1G10480	ZINC FINGER PROTEIN 5 (ZFP5)	Chr1	3449593	3450584	249.1	2491
AT1G10490	GNAT acetyltransferase (DUF699)	Chr1	3453047	3453921	210.9	2109
AT1G10500	CHLOROPLAST-LOCALIZED ISCA-LIKE PROTEIN (CPISCA)	Chr1	3460636	3462725	208.6	2086
AT1G10510	EMBRYO DEFECTIVE 2004 (emb2004)	Chr1	3460636	3462725	236	2360
AT1G10520	DNA POLYMERASE \{LAMBDA\} (Pol\{lambda\})	Chr1	3465805	3466451	87.9	879
AT1G10522	PLASTID REDOX INSENSITIVE 2 (PRIN2)	Chr1	3469755	3470644	149.3	1493
AT1G10530	D-ribose-binding periplasmic protein	Chr1	3471462	3472745	256	2560
AT1G10540	NUCLEOBASE-ASCORBATE TRANSPORTER 8 (NAT8)	Chr1	3477078	3478037	166.6	1666
AT1G10560	PLANT U-BOX 18 (PUB18)	Chr1	3484576	3486648	154.6	1546
AT1G10570	OVERLY TOLERANT TO SALT 2 (OTS2)	Chr1	3487426	3488270	191.8	1918
AT1G10580	Transducin/WD40 repeat-like superfamily protein	Chr1	3492368	3493945	304.5	3045
AT1G10590	Nucleic acid-binding%2C OB-fold-like protein	Chr1	3502506	3504479	265.3	2653
AT1G10600	ASSOCIATED MOLECULE WITH THE SH3 DOMAIN OF STAM 2 (AMSH2)	Chr1	3502506	3504479	274.3	2743
AT1G10630	ADP-RIBOSYLATION FACTOR A1F (ARFA1F)	Chr1	3514009	3514899	266.5	2665
AT1G10650	SBP (S-ribonuclease binding protein) family protein	Chr1	3525217	3526483	147	1470
AT1G10660	transmembrane protein	Chr1	3532341	3533330	235.6	2356
AT1G10670	ATP-CITRATE LYASE A-1 (ACLA-1)	Chr1	3535352	3536331	301.7	3017
AT1G10690	cyclin-dependent kinase inhibitor	Chr1	3549847	3550838	276.1	2761
AT1G10700	PHOSPHORIBOSYL PYROPHOSPHATE (PRPP) SYNTHASE 3 (PRS3)	Chr1	3553975	3555130	265	2650
AT1G10710	POOR HOMOLOGOUS SYNAPSIS 1 (PHS1)	Chr1	3558346	3558910	62.6	626
AT1G10720	BSD domain-containing protein	Chr1	3562797	3564073	235.1	2351
AT1G10730	ADAPTOR PROTEIN-1 MU-ADAPTIN 1; AP1M1	Chr1	3565137	3566037	186.7	1867
AT1G10740	alpha/beta-Hydrolases superfamily protein	Chr1	3569587	3570954	277.3	2773
AT1G10750	carboxyl-terminal peptidase%2C putative (DUF239)	Chr1	3577069	3578579	291.4	2914
AT1G10760	STARCH EXCESS 1 (SEX1)	Chr1	3589624	3590676	73.7	737
AT1G10780	F-box/RNI-like superfamily protein	Chr1	3594110	3595262	227.5	2275
AT1G10820	hypothetical protein (DUF3755)	Chr1	3604065	3605144	268.2	2682
AT1G10830	15-CIS-ZETA-CAROTENE ISOMERASE (Z-ISO)	Chr1	3606597	3607587	156.9	1569
AT1G10840	TRANSLATION INITIATION FACTOR 3 SUBUNIT H1 (TIF3H1)	Chr1	3609607	3610506	143	1430
AT1G10850	Leucine-rich repeat protein kinase family protein	Chr1	3611782	3613446	123.3	1233
AT1G10865	cytochrome C oxidase assembly factor	Chr1	3615535	3616266	148.4	1484
AT1G10870	ARF-GAP DOMAIN 4 (AGD4)	Chr1	3622937	3623950	320.2	3202
AT1G10890	arginine/glutamate-rich 1 protein	Chr1	3627528	3628490	301.9	3019
AT1G10900	Phosphatidylinositol-4-phosphate 5-kinase family protein	Chr1	3636465	3637299	191.1	1911
AT1G10910	EMBRYO DEFECTIVE 3103 (EMB3103)	Chr1	3639717	3640655	304.1	3041
AT1G10920	(LOV1)	Chr1	3646820	3647647	58.2	582
AT1G10930	(RECQ4A)	Chr1	3647937	3649338	150.2	1502
AT1G10940	SNF1-RELATED PROTEIN KINASE 2.4 (SNRK2.4)	Chr1	3657497	3658583	199	1990
AT1G10950	TRANSMEMBRANE NINE 1 (TMN1)	Chr1	3659069	3660001	206.9	2069
AT1G10960	FERREDOXIN 1 (FD1)	Chr1	3664332	3665035	151.1	1511
AT1G10970	ZINC TRANSPORTER 4 PRECURSOR (ZIP4)	Chr1	3666177	3667276	115.7	1157
AT1G10990	transmembrane protein	Chr1	3670184	3671165	171.9	1719
AT1G11000	MILDEW RESISTANCE LOCUS O 4 (MLO4)	Chr1	3671920	3672727	88.5	885
AT1G11020	RING/FYVE/PHD zinc finger superfamily protein	Chr1	3676649	3677735	206.6	2066
AT1G11050	Protein kinase superfamily protein	Chr1	3681753	3683214	178.1	1781
AT1G11060	ATWAPL1; WAPL1; WINGS APART-LIKE PROTEIN 1	Chr1	3684535	3685718	217.9	2179
AT1G11090	alpha/beta-Hydrolases superfamily protein	Chr1	3702465	3703939	358.6	3586
AT1G11100	FRG5; SNF2-RING-HELICASE?LIKE 5	Chr1	3708612	3709730	311.2	3112
AT1G11112	hypothetical protein	Chr1	3713070	3713694	89.7	897
AT1G11120	CTTNBP 2 amino-terminal-like protein	Chr1	3714965	3716095	254.6	2546
AT1G11125	hypothetical protein	Chr1	3718673	3719580	170.2	1702
AT1G11130	STRUBBELIG (SUB)	Chr1	3722800	3723941	264.9	2649
AT1G11160	Transducin/WD40 repeat-like superfamily protein	Chr1	3733103	3733767	64.3	643
AT1G11175		Chr1	3744761	3746303	251.8	2518
AT1G11180	SECRETORY CARRIER MEMBRANE PROTEIN 2 (SCAMP2)	Chr1	3744761	3746303	123.1	1231
AT1G11185		Chr1	3749500	3750631	106.8	1068
AT1G11200	organic solute transporter ostalpha protein (DUF300)	Chr1	3753184	3754109	170.5	1705
AT1G11210	cotton fiber protein%2C putative (DUF761)	Chr1	3756265	3756988	65.9	659
AT1G11220	cotton fiber%2C putative (DUF761)	Chr1	3759934	3761284	93.3	933
AT1G11240	ribosomal RNA-processing protein	Chr1	3767455	3768466	334.6	3346
AT1G11260	SUGAR TRANSPORTER 1 (STP1)	Chr1	3777226	3778421	219.9	2199
AT1G11270	F-box and associated interaction domains-containing protein	Chr1	3786190	3787158	92.2	922
AT1G11280	S-locus lectin protein kinase family protein	Chr1	3789931	3790861	124.5	1245
AT1G11290	CHLORORESPIRATORY REDUCTION22 (CRR22)	Chr1	3793122	3794799	236.3	2363
AT1G11310	MILDEW RESISTANCE LOCUS O 2 (MLO2)	Chr1	3802473	3804211	189.7	1897
AT1G11320	GDSL esterase/lipase	Chr1	3807060	3807981	111.3	1113
AT1G11330	S-locus lectin protein kinase family protein	Chr1	3810275	3811848	209.2	2092
AT1G11360	Adenine nucleotide alpha hydrolases-like superfamily protein	Chr1	3821834	3823152	363.5	3635
AT1G11380	PLAC8 family protein	Chr1	3832479	3833527	231	2310
AT1G11390	Protein kinase superfamily protein	Chr1	3836671	3838544	227.7	2277
AT1G11400	PARTNER OF Y14-MAGO (PYM)	Chr1	3836671	3838544	205.7	2057
AT1G11420	DOMAIN OF UNKNOWN FUNCTION 724 2 (DUF2)	Chr1	3846083	3848067	252.5	2525
AT1G11430	MULTIPLE ORGANELLAR RNA EDITING FACTOR 9 (MORF9)	Chr1	3846083	3848067	292.9	2929
AT1G11475	(NRPB10)	Chr1	3862289	3863146	229.8	2298
AT1G11480	eukaryotic translation initiation factor-like protein	Chr1	3865959	3867139	303	3030
AT1G11545	XYLOGLUCAN ENDOTRANSGLUCOSYLASE/HYDROLASE 8 (XTH8)	Chr1	3879501	3880422	170	1700
AT1G11580	METHYLESTERASE PCR A (PMEPCRA)	Chr1	3888571	3890742	250.5	2505
AT1G11592		Chr1	3895637	3897080	336.2	3362
AT1G11630	Tetratricopeptide repeat (TPR)-like superfamily protein	Chr1	3913445	3915909	260.4	2604
AT1G11650	(RBP45B)	Chr1	3913445	3915909	261.2	2612
AT1G11660	heat shock protein 70 (Hsp 70) family protein	Chr1	3920436	3921199	219.5	2195
AT1G11670	MATE efflux family protein	Chr1	3929720	3931632	307	3070
AT1G11680	CYTOCHROME P450 51G1 (CYP51G1)	Chr1	3938379	3940273	317.1	3171
AT1G11700	senescence regulator (Protein of unknown function%2C DUF584)	Chr1	3945715	3946484	172	1720
AT1G11710	Pentatricopeptide repeat (PPR) superfamily protein	Chr1	3948573	3949539	253.2	2532
AT1G11720	STARCH SYNTHASE 3 (SS3)	Chr1	3951229	3952225	259.7	2597
AT1G11740	ankyrin repeat family protein	Chr1	3965938	3966821	79.1	791
AT1G11750	CLP PROTEASE PROTEOLYTIC SUBUNIT 6 (CLPP6)	Chr1	3967365	3968277	220.5	2205
AT1G11755	LEAF WILTING 1 (LEW1)	Chr1	3971088	3971968	205.9	2059
AT1G11760	(MED32)	Chr1	3972626	3973440	262.1	2621
AT1G11780	oxidoreductase%2C 2OG-Fe(II) oxygenase family protein	Chr1	3978414	3979354	246.2	2462
AT1G11790	AROGENATE DEHYDRATASE 1 (ADT1)	Chr1	3981104	3982130	275	2750
AT1G11800	endonuclease/exonuclease/phosphatase family protein	Chr1	3986419	3987430	337.8	3378
AT1G11820	O-Glycosyl hydrolases family 17 protein	Chr1	3992429	3993672	252.3	2523
AT1G11840	GLYOXALASE I HOMOLOG (GLX1)	Chr1	3995273	3996319	192.2	1922
AT1G11860	Glycine cleavage T-protein family	Chr1	4001175	4002233	218.5	2185
AT1G11870	SERYL-TRNA SYNTHETASE (SRS)	Chr1	4003641	4004666	323.1	3231
AT1G11880	transferases%2C transferring hexosyl groups	Chr1	4009557	4010558	225.2	2252
AT1G11890	SECRETION 22 (SEC22)	Chr1	4010694	4011409	108.6	1086
AT1G11900	Tetratricopeptide repeat (TPR)-like superfamily protein	Chr1	4014091	4015700	86.3	863
AT1G11905	B-cell receptor-associated protein 31-like protein	Chr1	4014091	4015700	180.4	1804
AT1G11910	ASPARTIC PROTEINASE A1 (APA1)	Chr1	4019507	4021077	305.7	3057
AT1G11930	Putative pyridoxal phosphate-dependent enzyme%2C YBL036C type	Chr1	4028518	4029565	329.3	3293
AT1G11940	Core-2/I-branching beta-1%2C6-N-acetylglucosaminyltransferase family protein	Chr1	4033232	4034250	276.3	2763
AT1G11950	Transcription factor jumonji (jmjC) domain-containing protein	Chr1	4038027	4038953	188.8	1888
AT1G11960	ERD (early-responsive to dehydration stress) family protein	Chr1	4043034	4044100	265	2650
AT1G12000	Phosphofructokinase family protein	Chr1	4052930	4054008	339.4	3394
AT1G12020	hypothetical protein	Chr1	4062403	4063425	160.4	1604
AT1G12030	phosphoenolpyruvate carboxylase%2C putative (DUF506)	Chr1	4064884	4066492	167.6	1676
AT1G12050	ATFAH; FAH; FUMARYLACETOACETATE HYDROLASE; SHORT-DAY SENSITIVE CELL DEATHSHORT-DAY SENSITIVE CELL DEATHSHORT-DAY SENSITIVE CELL DEATH 111; SSCD1	Chr1	4072572	4073645	309.6	3096
AT1G12060	BCL-2-ASSOCIATED ATHANOGENE 5 (BAG5)	Chr1	4076205	4077116	303.5	3035
AT1G12110	NITRATE TRANSPORTER 1.1 (NRT1.1)	Chr1	4105144	4106929	247.7	2477
AT1G12120	hypothetical protein (DUF863)	Chr1	4116491	4117626	227.5	2275
AT1G12140	FLAVIN-MONOOXYGENASE GLUCOSINOLATE S-OXYGENASE 5 (FMO GS-OX5)	Chr1	4121219	4122201	190.6	1906
AT1G12160	Flavin-binding monooxygenase family protein	Chr1	4125913	4127099	293	2930
AT1G12200	FLAVIN MONOOXYGENASE (FMO)	Chr1	4137402	4139633	194.8	1948
AT1G12220	RESISTANT TO P. SYRINGAE 5 (RPS5)	Chr1	4144803	4145799	193.4	1934
AT1G12230	Aldolase superfamily protein	Chr1	4147829	4148740	299.3	2993
AT1G12240	(ATBETAFRUCT4)	Chr1	4153556	4154157	91.1	911
AT1G12244	Polynucleotidyl transferase%2C ribonuclease H-like superfamily protein	Chr1	4157580	4158570	239.3	2393
AT1G12250	TL20.3	Chr1	4159203	4160060	170.6	1706
AT1G12270	HOP1 (Hop1)	Chr1	4171843	4173386	363.5	3635
AT1G12290	Disease resistance protein (CC-NBS-LRR class) family	Chr1	4181801	4182748	221.8	2218
AT1G12294	MICRORNA472A (MIR472A)	Chr1	4181801	4182748	221.8	2218
AT1G12300	Tetratricopeptide repeat (TPR)-like superfamily protein	Chr1	4185448	4186229	111.6	1116
AT1G12310	Calcium-binding EF-hand family protein	Chr1	4186956	4188168	195.6	1956
AT1G12320	ankyrin repeat/KH domain protein (DUF1442)	Chr1	4189360	4190278	145.8	1458
AT1G12330	cyclin-dependent kinase-like protein	Chr1	4194656	4196237	234.8	2348
AT1G12350	4-PHOSPHO-PANTO-THENOYLCYSTEINE SYNTHETASE (COAB)	Chr1	4198336	4199133	122.4	1224
AT1G12360	KEULE (KEU)	Chr1	4200889	4201831	302.7	3027
AT1G12370	PHOTOLYASE 1 (PHR1)	Chr1	4208018	4209043	167.3	1673
AT1G12380	hypothetical protein	Chr1	4215320	4217241	231.8	2318
AT1G12390	Cornichon family protein	Chr1	4220096	4220783	76.5	765
AT1G12400	Nucleotide excision repair%2C TFIIH%2C subunit TTDA	Chr1	4221778	4222582	94.8	948
AT1G12410	CLP PROTEASE PROTEOLYTIC SUBUNIT 2 (CLP2)	Chr1	4222923	4223731	152.1	1521
AT1G12420	ACT DOMAIN REPEAT 8 (ACR8)	Chr1	4226925	4229173	164.6	1646
AT1G12430	ARMADILLO REPEAT KINESIN 3 (ARK3)	Chr1	4237699	4238806	241.4	2414
AT1G12440	A20/AN1-like zinc finger family protein	Chr1	4241531	4243093	171.8	1718
AT1G12450	SNARE associated Golgi protein family	Chr1	4244236	4245184	176	1760
AT1G12460	Leucine-rich repeat protein kinase family protein	Chr1	4247557	4248426	142.8	1428
AT1G12470	zinc ion binding protein	Chr1	4250812	4251853	298	2980
AT1G12500	Nucleotide-sugar transporter family protein	Chr1	4263583	4265148	212.3	2123
AT1G12520	COPPER CHAPERONE FOR SOD1 (CCS)	Chr1	4268038	4269031	175.3	1753
AT1G12530	hypothetical protein	Chr1	4270172	4270974	179.2	1792
AT1G12550	HYDROXYPYRUVATE REDUCTASE 3 (HPR3)	Chr1	4274475	4275371	328.1	3281
AT1G12580	PHOSPHOENOLPYRUVATE CARBOXYLASE-RELATED KINASE 1 (PEPKR1)	Chr1	4282742	4283786	316	3160
AT1G12600	UDP-N-acetylglucosamine (UAA) transporter family	Chr1	4288083	4289062	111.5	1115
AT1G12610	DWARF AND DELAYED FLOWERING 1 (DDF1)	Chr1	4290369	4290873	41.9	419
AT1G12620	Pentatricopeptide repeat (PPR) superfamily protein	Chr1	4296123	4297269	301.7	3017
AT1G12630	Integrase-type DNA-binding superfamily protein	Chr1	4298705	4299449	166.6	1666
AT1G12640	LYSOPHOSPHOLIPID ACYLTRANSFERASE 1 (LPLAT1)	Chr1	4304840	4306756	334.8	3348
AT1G12650	rRNA biogenesis RRP36-like protein	Chr1	4304840	4306756	254.8	2548
AT1G12680	PHOSPHOENOLPYRUVATE CARBOXYLASE-RELATED KINASE 2 (PEPKR2)	Chr1	4321966	4323250	288.3	2883
AT1G12700	RNA PROCESSING FACTOR 1 (RPF1)	Chr1	4325696	4326373	109.1	1091
AT1G12710	PHLOEM PROTEIN 2-A12 (PP2-A12)	Chr1	4327497	4328647	308.4	3084
AT1G12730	GPI transamidase subunit PIG-U	Chr1	4334431	4335401	340.3	3403
AT1G12740	"CYTOCHROME P450, FAMILY 87, SUBFAMILY A, POLYPEPTIDE 2" (CYP87A2)	Chr1	4342268	4344069	212.6	2126
AT1G12760	Zinc finger%2C C3HC4 type (RING finger) family protein	Chr1	4348043	4349950	126.4	1264
AT1G12770	EMBRYO DEFECTIVE 1586 (EMB1586)	Chr1	4351214	4351811	40.7	407
AT1G12775	Pentatricopeptide repeat (PPR) superfamily protein	Chr1	4353840	4354470	57.5	575
AT1G12780	UDP-D-GLUCOSE/UDP-D-GALACTOSE 4-EPIMERASE 1 (UGE1)	Chr1	4356482	4358393	101.4	1014
AT1G12790	DNA ligase-like protein	Chr1	4360665	4361352	85.1	851
AT1G12800	S1 DOMAIN-CONTAINING RBP; SDP	Chr1	4364457	4365420	111.4	1114
AT1G12805	nucleotide binding protein	Chr1	4366653	4368373	54.2	542
AT1G12810	proline-rich family protein	Chr1	4366653	4368373	85.8	858
AT1G12820	AUXIN SIGNALING F-BOX 3 (AFB3)	Chr1	4369799	4371254	75.3	753
AT1G12830	nucleolin	Chr1	4374082	4376393	134.5	1345
AT1G12840	DE-ETIOLATED 3 (DET3)	Chr1	4374082	4376393	176.9	1769
AT1G12850	Phosphoglycerate mutase family protein	Chr1	4380642	4381777	296.1	2961
AT1G12860	SCREAM 2 (SCRM2)	Chr1	4384566	4385558	102.7	1027
AT1G12880	NUDIX HYDROLASE HOMOLOG 12 (NUDT12)	Chr1	4389800	4390948	56.3	563
AT1G12890	Integrase-type DNA-binding superfamily protein	Chr1	4391696	4392546	54.7	547
AT1G12910	ANTHOCYANIN11 (ATAN11)	Chr1	4395126	4398234	154.7	1547
AT1G12920	EUKARYOTIC RELEASE FACTOR 1-2 (ERF1-2)	Chr1	4395126	4398234	180.7	1807
AT1G12930	ARM repeat superfamily protein	Chr1	4404375	4405732	347.5	3475
AT1G12940	NITRATE TRANSPORTER2.5 (NRT2.5)	Chr1	4416235	4417230	221	2210
AT1G12950	ROOT HAIR SPECIFIC 2 (RSH2)	Chr1	4419738	4421059	115.7	1157
AT1G12970	PLANT INTRACELLULAR RAS GROUP-RELATED LRR 3 (PIRL3)	Chr1	4423484	4424683	256.7	2567
AT1G12980	ENHANCER OF SHOOT REGENERATION 1 (ESR1)	Chr1	4429724	4430387	78.8	788
AT1G12990	beta-1%2C4-N-acetylglucosaminyltransferase family protein	Chr1	4433514	4434946	261.4	2614
AT1G13000	transmembrane protein%2C putative (DUF707)	Chr1	4438675	4439549	115.8	1158
AT1G13020	EUKARYOTIC INITIATION FACTOR 4B2 (EIF4B2)	Chr1	4442188	4443801	135.9	1359
AT1G13030	sphere organelles protein-like protein	Chr1	4446609	4448231	145.5	1455
AT1G13040	Pentatricopeptide repeat (PPR-like) superfamily protein	Chr1	4446609	4448231	143.7	1437
AT1G13060	20S PROTEASOME BETA SUBUNIT E1 (PBE1)	Chr1	4452122	4453037	285.9	2859
AT1G13080	"CYTOCHROME P450, FAMILY 71, SUBFAMILY B, POLYPEPTIDE 2" (CYP71B2)	Chr1	4459263	4459882	44.4	444
AT1G13090	"CYTOCHROME P450, FAMILY 71, SUBFAMILY B, POLYPEPTIDE 28" (CYP71B28)	Chr1	4461713	4462613	255.1	2551
AT1G13120	nucleoporin GLE1-like protein	Chr1	4472275	4473395	314.4	3144
AT1G13160	ARM repeat superfamily protein	Chr1	4484420	4485551	322.9	3229
AT1G13170	OSBP(OXYSTEROL BINDING PROTEIN)-RELATED PROTEIN 1D (ORP1D)	Chr1	4491445	4492697	240.8	2408
AT1G13180	DISTORTED TRICHOMES 1 (DIS1)	Chr1	4494933	4496131	159.8	1598
AT1G13190	RNA-binding (RRM/RBD/RNP motifs) family protein	Chr1	4498793	4499758	153.6	1536
AT1G13195	RING/U-box superfamily protein	Chr1	4502424	4503627	251.2	2512
AT1G13210	AUTOINHIBITED CA2+/ATPASE II (ACA.l)	Chr1	4512345	4514006	218.2	2182
AT1G13220	LITTLE NUCLEI2 (LINC2)	Chr1	4515450	4516443	225.6	2256
AT1G13245	ROTUNDIFOLIA LIKE 17 (RTFL17)	Chr1	4525481	4526181	181.3	1813
AT1G13250	GALACTURONOSYLTRANSFERASE-LIKE 3 (GATL3)	Chr1	4528915	4530185	316	3160
AT1G13260	RELATED TO ABI3/VP1 1 (RAV1)	Chr1	4542202	4543645	230	2300
AT1G13270	METHIONINE AMINOPEPTIDASE 1B (MAP1C)	Chr1	4544889	4545676	110.9	1109
AT1G13280	ALLENE OXIDE CYCLASE 4 (AOC4)	Chr1	4547469	4548715	222.7	2227
AT1G13320	PROTEIN PHOSPHATASE 2A SUBUNIT A3 (PP2AA3)	Chr1	4567110	4568373	241.8	2418
AT1G13330	ARABIDOPSIS HOP2 HOMOLOG (AHP2)	Chr1	4567110	4568373	73.1	731
AT1G13340	Regulator of Vps4 activity in the MVB pathway protein	Chr1	4569741	4571109	147.1	1471
AT1G13350	Protein kinase superfamily protein	Chr1	4575625	4576838	285.4	2854
AT1G13360	hypothetical protein	Chr1	4576965	4577966	281.5	2815
AT1G13380	sodium/hydrogen exchanger (DUF1218)	Chr1	4589601	4590566	205.3	2053
AT1G13390	translocase subunit seca	Chr1	4592579	4594371	201	2010
AT1G13410	Tetratricopeptide repeat (TPR)-like superfamily protein	Chr1	4601193	4601884	117.4	1174
AT1G13440	GLYCERALDEHYDE-3-PHOSPHATE DEHYDROGENASE C2 (GAPC2)	Chr1	4608593	4610666	153.5	1535
AT1G13450	GT-1 (GT-1)	Chr1	4614302	4615300	188.7	1887
AT1G13460	TRUE	Chr1	4615756	4616658	176.8	1768
AT1G13560	AMINOALCOHOLPHOSPHOTRANSFERASE 1 (AAPT1)	Chr1	4641291	4642237	210.2	2102
AT1G13570	F-box/RNI-like superfamily protein	Chr1	4643644	4644454	190.4	1904
AT1G13580	LAG1 LONGEVITY ASSURANCE HOMOLOG 3 (LAG13)	Chr1	4646313	4647059	145.5	1455
AT1G13630	Tetratricopeptide repeat (TPR)-like superfamily protein	Chr1	4672162	4673245	343.5	3435
AT1G13640	Phosphatidylinositol 3- and 4-kinase family protein	Chr1	4678767	4679994	293.8	2938
AT1G13690	ATPASE E1 (ATE1)	Chr1	4693133	4694167	333.8	3338
AT1G13700	6-PHOSPHOGLUCONOLACTONASE 1 (PGL1)	Chr1	4695144	4696398	86.3	863
AT1G13730	Nuclear transport factor 2 (NTF2) family protein with RNA binding (RRM-RBD-RNP motifs) domain-containing protein	Chr1	4709833	4710699	195.1	1951
AT1G13740	ABI FIVE BINDING PROTEIN 2 (AFP2)	Chr1	4713585	4714942	232.5	2325
AT1G13750	Purple acid phosphatases superfamily protein	Chr1	4717358	4718220	43.8	438
AT1G13770	ROOT UV-B SENSITIVE 3 (RUS3)	Chr1	4721501	4722443	246.9	2469
AT1G13780	F-box/RNI-like/FBD-like domains-containing protein	Chr1	4724449	4725243	181.9	1819
AT1G13800	EMBRYONIC FACTOR 19 (FAC19)	Chr1	4733128	4734805	217.1	2171
AT1G13810	Restriction endonuclease%2C type II-like superfamily protein	Chr1	4733128	4734805	210.5	2105
AT1G13820	alpha/beta-Hydrolases superfamily protein	Chr1	4735405	4736196	184.8	1848
AT1G13860	QUASIMODO2 LIKE 1 (QUL1)	Chr1	4746194	4747042	160.3	1603
AT1G13870	DEFORMED ROOTS AND LEAVES 1 (DRL1)	Chr1	4747766	4750249	104.6	1046
AT1G13880	ELM2	Chr1	4747766	4750249	133	1330
AT1G13900	PURPLE ACID PHOSPHATASE 2 (PAP2)	Chr1	4754449	4756678	230.4	2304
AT1G13910	Leucine-rich repeat (LRR) family protein	Chr1	4754449	4756678	218.1	2181
AT1G13930	oleosin-B3-like protein	Chr1	4760960	4761812	234.2	2342
AT1G13940	T-box transcription factor%2C putative (DUF863)	Chr1	4765473	4766953	261.3	2613
AT1G13950	EUKARYOTIC ELONGATION FACTOR 5A-1 (ELF5A-1)	Chr1	4773445	4774192	128.5	1285
AT1G13960	WRKY DNA-BINDING PROTEIN 4 (WRKY4)	Chr1	4776363	4777588	312.6	3126
AT1G13970	beta-hexosaminidase (DUF1336)	Chr1	4781394	4782513	67.3	673
AT1G13980	GNOM (GN)	Chr1	4788436	4789259	282	2820
AT1G13990	plant/protein	Chr1	4794639	4795918	236	2360
AT1G14000	VH1-INTERACTING KINASE (VIK)	Chr1	4797361	4798445	158.5	1585
AT1G14010	emp24/gp25L/p24 family/GOLD family protein	Chr1	4801005	4801943	175.9	1759
AT1G14020	O-fucosyltransferase family protein	Chr1	4802697	4803646	174.6	1746
AT1G14030	LYSINE METHYLTRANSFERASE (LSMT)-LIKE (LSMT-L)	Chr1	4806694	4807610	203.2	2032
AT1G14040	EXS (ERD1/XPR1/SYG1) family protein	Chr1	4810405	4811279	120.5	1205
AT1G14060	GCK domain-containing protein	Chr1	4816970	4818195	285.2	2852
AT1G14130	ATDAO; DAO1; DIOXYGENASE FOR AUXIN OXIDATION 1	Chr1	4835970	4837636	130	1300
AT1G14140	UNCOUPLING PROTEIN 3 (UCP3)	Chr1	4838847	4839819	232.9	2329
AT1G14170	RNA-binding KH domain-containing protein	Chr1	4845202	4845955	195.3	1953
AT1G14180	RING/U-box superfamily protein	Chr1	4847042	4847926	215.2	2152
AT1G14200	RING/U-box superfamily protein	Chr1	4854228	4855403	279.4	2794
AT1G14210	Ribonuclease T2 family protein	Chr1	4857166	4857975	116.9	1169
AT1G14230	GDA1/CD39 nucleoside phosphatase family protein	Chr1	4861115	4862329	296.2	2962
AT1G14260	RING/FYVE/PHD zinc finger superfamily protein	Chr1	4872796	4873911	237.1	2371
AT1G14270	CAAX amino terminal protease family protein	Chr1	4876577	4877304	156	1560
AT1G14290	SPHINGOID BASE HYDROXYLASE 2 (SBH2)	Chr1	4880987	4882095	188.5	1885
AT1G14300	ARM repeat superfamily protein	Chr1	4884139	4885549	100	1000
AT1G14310	Haloacid dehalogenase-like hydrolase (HAD) superfamily protein	Chr1	4884139	4885549	67.5	675
AT1G14320	SUPPRESSOR OF ACAULIS 52 (SAC52)	Chr1	4888165	4889318	98.2	982
AT1G14330	Galactose oxidase/kelch repeat superfamily protein	Chr1	4890361	4892189	173.2	1732
AT1G14340	RNA-binding (RRM/RBD/RNP motifs) family protein	Chr1	4897240	4898183	237.1	2371
AT1G14345	NAD(P)-linked oxidoreductase superfamily protein	Chr1	4898965	4899944	300.5	3005
AT1G14350	FOUR LIPS (FLP)	Chr1	4907977	4910148	133	1330
AT1G14360	UDP-GALACTOSE TRANSPORTER 3 (UTR3)	Chr1	4912368	4913237	119.9	1199
AT1G14370	PROTEIN KINASE 2A (APK2A)	Chr1	4915584	4916838	143.8	1438
AT1G14380	IQ-DOMAIN 28 (IQD28)	Chr1	4920824	4921692	165.6	1656
AT1G14390	Leucine-rich repeat protein kinase family protein	Chr1	4924172	4925589	111.1	1111
AT1G14400	UBIQUITIN CARRIER PROTEIN 1 (UBC1)	Chr1	4927888	4928759	166.9	1669
AT1G14410	WHIRLY 1 (WHY1)	Chr1	4930073	4931020	186.4	1864
AT1G14430	glyoxal oxidase-related protein	Chr1	4934641	4936011	269.1	2691
AT1G14450	NADH dehydrogenase (ubiquinone)s	Chr1	4946798	4947797	347.5	3475
AT1G14460	AAA-type ATPase family protein	Chr1	4951885	4953008	206.5	2065
AT1G14470	Pentatricopeptide repeat (PPR) superfamily protein	Chr1	4953977	4954777	153.9	1539
AT1G14490	AHL28; AT-HOOK MOTIF NUCLEAR LOCALIZED PROTEIN 28	Chr1	4958492	4959406	186.1	1861
AT1G14510	ALFIN-LIKE 7 (AL7)	Chr1	4963328	4964543	341.6	3416
AT1G14530	TOM THREE HOMOLOG 1 (THH1)	Chr1	4972927	4973878	295.4	2954
AT1G14560	Mitochondrial substrate carrier family protein	Chr1	4980496	4981642	257.5	2575
AT1G14570	ATPUX7; PLANT UBX DOMAIN-CONTAINING PROTEIN 7; PUX7	Chr1	4983389	4984461	285.5	2855
AT1G14590	Nucleotide-diphospho-sugar transferase family protein	Chr1	4999921	5000842	308.8	3088
AT1G14600	Homeodomain-like superfamily protein	Chr1	5002979	5003571	90.6	906
AT1G14610	TWIN 2 (TWN2)	Chr1	5013742	5014657	303.4	3034
AT1G14620	DECOY (DECOY)	Chr1	5015783	5016761	264.6	2646
AT1G14630	XRI1-like protein	Chr1	5020209	5021472	41.7	417
AT1G14640	SWAP (Suppressor-of-White-APricot)/surp domain-containing protein	Chr1	5023353	5024384	147.6	1476
AT1G14650	SWAP (Suppressor-of-White-APricot)/surp domain-containing protein / ubiquitin family protein	Chr1	5027515	5028599	248.5	2485
AT1G14660	NA+/H+ EXCHANGER 8 (NHX8)	Chr1	5035684	5036615	182.2	1822
AT1G14670	Endomembrane protein 70 protein family	Chr1	5037463	5038433	206.2	2062
AT1G14680	early endosome antigen	Chr1	5040749	5041494	121.7	1217
AT1G14685	BASIC PENTACYSTEINE 2 (BPC2)	Chr1	5042457	5043942	174.2	1742
AT1G14687	HOMEOBOX PROTEIN 32 (HB32)	Chr1	5047863	5048644	259.7	2597
AT1G14690	MICROTUBULE-ASSOCIATED PROTEIN 65-7 (MAP65-7)	Chr1	5054102	5055358	343.5	3435
AT1G14710	hydroxyproline-rich glycoprotein family protein	Chr1	5063830	5065198	231.4	2314
AT1G14720	XYLOGLUCAN ENDOTRANSGLUCOSYLASE/HYDROLASE 28 (XTH28)	Chr1	5066802	5068590	156.6	1566
AT1G14740	TITANIA 1 (TTA1)	Chr1	5076156	5077896	258.1	2581
AT1G14750	SOLO DANCERS (SDS)	Chr1	5081405	5082642	213	2130
AT1G14770	RING/FYVE/PHD zinc finger superfamily protein	Chr1	5088090	5088958	201.6	2016
AT1G14780	MAC/Perforin domain-containing protein	Chr1	5090893	5091521	61.5	615
AT1G14790	RNA-DEPENDENT RNA POLYMERASE 1 (RDR1)	Chr1	5097161	5098161	232.7	2327
AT1G14810	semialdehyde dehydrogenase family protein	Chr1	5103625	5104869	267.5	2675
AT1G14820	Sec14p-like phosphatidylinositol transfer family protein	Chr1	5105896	5107009	131.7	1317
AT1G14830	DYNAMIN-LIKE 1C (DL1C)	Chr1	5110691	5111794	238.6	2386
AT1G14840	MICROTUBULE-ASSOCIATED PROTEINS 70-4 (MAP70-4)	Chr1	5114783	5115625	225.4	2254
AT1G14850	NUCLEOPORIN 155 (NUP155)	Chr1	5122470	5123675	333.7	3337
AT1G14870	PLANT CADMIUM RESISTANCE 2 (PCR2)	Chr1	5128344	5129515	193.9	1939
AT1G14890	Plant invertase/pectin methylesterase inhibitor superfamily protein	Chr1	5136968	5137924	231.8	2318
AT1G14900	HIGH MOBILITY GROUP A (HMGA)	Chr1	5138355	5139522	169.7	1697
AT1G14910	ENTH/ANTH/VHS superfamily protein	Chr1	5142603	5143849	229.4	2294
AT1G14920	GIBBERELLIC ACID INSENSITIVE (GAI)	Chr1	5149190	5151111	306.5	3065
AT1G14970	O-fucosyltransferase family protein	Chr1	5164257	5165153	133.3	1333
AT1G14980	CHAPERONIN 10 (CPN10)	Chr1	5165977	5166795	101.1	1011
AT1G14990	transmembrane protein	Chr1	5167553	5168222	75.2	752
AT1G15000	SERINE CARBOXYPEPTIDASE-LIKE 50 (scpl50)	Chr1	5168630	5170543	80.7	807
AT1G15002		Chr1	5168630	5170543	46.5	465
AT1G15020	QUIESCIN-SULFHYDRYL OXIDASE 1 (QSOX1)	Chr1	5175360	5176369	229.9	2299
AT1G15030	hypothetical protein (DUF789)	Chr1	5177445	5178664	231.2	2312
AT1G15060	alpha/beta hydrolase family protein	Chr1	5186065	5187139	341.4	3414
AT1G15080	LIPID PHOSPHATE PHOSPHATASE 2 (LPP2)	Chr1	5187544	5188380	148.4	1484
AT1G15100	RING-H2 FINGER A2A (RHA2A)	Chr1	5192082	5194366	348	3480
AT1G15110	PHOSPHATIDYLSERINE SYNTHASE 1 (PSS1)	Chr1	5199043	5200731	247.8	2478
AT1G15120	Ubiquinol-cytochrome C reductase hinge protein	Chr1	5202780	5203561	155.1	1551
AT1G15130	Endosomal targeting BRO1-like domain-containing protein	Chr1	5208656	5210061	187	1870
AT1G15140	FAD/NAD(P)-binding oxidoreductase	Chr1	5211106	5212305	202	2020
AT1G15165	RING/FYVE/PHD zinc finger superfamily protein	Chr1	5219247	5221791	229.8	2298
AT1G15170	MATE efflux family protein	Chr1	5219247	5221791	241.1	2411
AT1G15190	Fasciclin-like arabinogalactan family protein	Chr1	5227023	5228134	254.8	2548
AT1G15200	protein-protein interaction regulator family protein	Chr1	5230059	5231183	226	2260
AT1G15210	ATP-BINDING CASSETTE G35 (ABCG35)	Chr1	5235353	5236814	193.8	1938
AT1G15215	SAWADEE HOMEODOMAIN HOMOLOG 1 (SHH1)	Chr1	5237997	5238611	73.2	732
AT1G15220	(CCMH)	Chr1	5240755	5241573	98.1	981
AT1G15230	hypothetical protein	Chr1	5242323	5244376	149.3	1493
AT1G15240	phox (PX) domain-containing protein	Chr1	5242323	5244376	165.9	1659
AT1G15250	Zinc-binding ribosomal protein family protein	Chr1	5248749	5249587	177.6	1776
AT1G15270	Translation machinery associated TMA7	Chr1	5251367	5253211	185.9	1859
AT1G15280	CASC3/Barentsz eIF4AIII binding protein	Chr1	5251367	5253211	193.3	1933
AT1G15290	Tetratricopeptide repeat (TPR)-like superfamily protein	Chr1	5257314	5258120	81.5	815
AT1G15310	SIGNAL RECOGNITION PARTICLE 54 KDA SUBUNIT (ATHSRP54A)	Chr1	5271237	5272141	184.6	1846
AT1G15330	Cystathionine beta-synthase (CBS) protein	Chr1	5274314	5274946	51.1	511
AT1G15340	METHYL-CPG-BINDING DOMAIN 10 (MBD10)	Chr1	5276710	5277717	213.3	2133
AT1G15350	DUF4050 family protein	Chr1	5279060	5280040	228	2280
AT1G15370	SNARE-like superfamily protein	Chr1	5286881	5287835	286.7	2867
AT1G15390	PEPTIDE DEFORMYLASE 1A (PDF1A)	Chr1	5294572	5295537	133.8	1338
AT1G15400	hypothetical protein	Chr1	5295853	5296943	137.7	1377
AT1G15420	LANT-SPECIFIC COMPONENT OF THE PRE- RRNA PROCESSING COMPLEX1; PCP1	Chr1	5301979	5303498	160.7	1607
AT1G15430	hypothetical protein (DUF1644)	Chr1	5304316	5305234	104.9	1049
AT1G15440	PERIODIC TRYPTOPHAN PROTEIN 2 (PWP2)	Chr1	5308499	5309702	296.3	2963
AT1G15470	Transducin/WD40 repeat-like superfamily protein	Chr1	5315372	5316350	296.3	2963
AT1G15480	Tetratricopeptide repeat (TPR)-like superfamily protein	Chr1	5317900	5318898	186.9	1869
AT1G15490	alpha/beta-Hydrolases superfamily protein	Chr1	5322756	5323940	187.4	1874
AT1G15500	(ATNTT2)	Chr1	5326140	5327494	174.2	1742
AT1G15510	EARLY CHLOROPLAST BIOGENESIS2 (ECB2)	Chr1	5328973	5329740	156.9	1569
AT1G15520	ATP-BINDING CASSETTE G40 (ABCG40)	Chr1	5332131	5333067	208.5	2085
AT1G15530	Concanavalin A-like lectin protein kinase family protein	Chr1	5340157	5342150	293.2	2932
AT1G15570	CYCLIN A2;3 (CYCA2;3)	Chr1	5361889	5363246	235.7	2357
AT1G15580	INDOLE-3-ACETIC ACID INDUCIBLE 5 (IAA5)	Chr1	5364854	5366542	75	750
AT1G15640	transmembrane protein	Chr1	5379056	5379925	69.2	692
AT1G15660	CENTROMERE PROTEIN C (CENP-C)	Chr1	5380977	5381976	262.6	2626
AT1G15670	Galactose oxidase/kelch repeat superfamily protein	Chr1	5389874	5391472	342.6	3426
AT1G15690	(AVP1)	Chr1	5398871	5401220	128.7	1287
AT1G15700	(ATPC2)	Chr1	5403196	5403810	44.4	444
AT1G15710	prephenate dehydrogenase family protein	Chr1	5404355	5405438	73	730
AT1G15720	TRF-LIKE 5 (TRFL5)	Chr1	5405949	5406856	97	970
AT1G15730	Cobalamin biosynthesis CobW-like protein	Chr1	5409302	5410082	134.5	1345
AT1G15740	Leucine-rich repeat family protein	Chr1	5410829	5411840	172.9	1729
AT1G15750	TOPLESS (TPL)	Chr1	5419488	5421053	313.6	3136
AT1G15760	Sterile alpha motif (SAM) domain-containing protein	Chr1	5425648	5426466	200.9	2009
AT1G15780	MED15_1; MEDIATOR 15_1; NON-RECOGNITION-OF-BTH 4; NRB4	Chr1	5435633	5436727	316	3160
AT1G15790	mediator of RNA polymerase II transcription subunit 15a-like protein	Chr1	5439346	5440060	60.7	607
AT1G15800	hypothetical protein	Chr1	5442584	5443722	106.9	1069
AT1G15810	S15/NS1%2C RNA-binding protein	Chr1	5444398	5445471	84	840
AT1G15820	LIGHT HARVESTING COMPLEX PHOTOSYSTEM II SUBUNIT 6 (LHCB6)	Chr1	5446716	5447737	75.9	759
AT1G15830	hypothetical protein	Chr1	5448229	5449502	46.5	465
AT1G15860	defective in cullin neddylation protein (DUF298)	Chr1	5454738	5455732	217	2170
AT1G15870	Mitochondrial glycoprotein family protein	Chr1	5457061	5457735	78.6	786
AT1G15880	GOLGI SNARE 11 (GOS11)	Chr1	5459563	5461108	145.7	1457
AT1G15885	hypothetical protein	Chr1	5459563	5461108	101.2	1012
AT1G15900	transmembrane protein	Chr1	5464215	5465073	143.3	1433
AT1G15910	FACTOR OF DNA METHYLATION 1 (FDM1)	Chr1	5465314	5466132	106.9	1069
AT1G15920	Polynucleotidyl transferase%2C ribonuclease H-like superfamily protein	Chr1	5469381	5470549	113.2	1132
AT1G15930	Ribosomal protein L7Ae/L30e/S12e/Gadd45 family protein	Chr1	5471340	5472129	141.2	1412
AT1G15940	ATPDS5E; PDS5E	Chr1	5473454	5474254	89.4	894
AT1G15950	CINNAMOYL COA REDUCTASE 1 (CCR1)	Chr1	5478619	5479683	176.7	1767
AT1G15970	DNA glycosylase superfamily protein	Chr1	5487739	5489014	324.1	3241
AT1G15980	PHOTOSYNTHETIC NDH SUBCOMPLEX B 1 (PnsB1)	Chr1	5489210	5489765	49.5	495
AT1G16000	GAG1At protein	Chr1	5494439	5495209	159.3	1593
AT1G16010	MAGNESIUM TRANSPORTER 2 (MGT2)	Chr1	5496864	5497859	208.7	2087
AT1G16020	CALCIUM CAFFEINE ZINC SENSITIVITY 1A; CCZ1A	Chr1	5498016	5499010	188.8	1888
AT1G16030	HEAT SHOCK PROTEIN 70B (Hsp70b)	Chr1	5503425	5505504	230.2	2302
AT1G16040	phosphatidylinositol-glycan biosynthesis class F-like protein	Chr1	5503425	5505504	215.4	2154
AT1G16060	ARIA-INTERACTING DOUBLE AP2 DOMAIN PROTEIN (ADAP)	Chr1	5511044	5511821	190.3	1903
AT1G16080	nuclear protein	Chr1	5514190	5515148	213.8	2138
AT1G16110	WALL ASSOCIATED KINASE-LIKE 6 (WAKL6)	Chr1	5518303	5519155	134.4	1344
AT1G16120	WALL ASSOCIATED KINASE-LIKE 1 (WAKL1)	Chr1	5522596	5523377	69.2	692
AT1G16130	WALL ASSOCIATED KINASE-LIKE 2 (WAKL2)	Chr1	5525545	5526285	63.8	638
AT1G16170	ephrin-A3 protein	Chr1	5538952	5539868	125.8	1258
AT1G16180	Serinc-domain containing serine and sphingolipid biosynthesis protein	Chr1	5540384	5541669	188.5	1885
AT1G16190	RADIATION SENSITIVE23A (RAD23A)	Chr1	5543097	5543737	105.6	1056
AT1G16210	coiled-coil protein	Chr1	5546596	5547706	220.5	2205
AT1G16220	Protein phosphatase 2C family protein	Chr1	5548324	5549271	241.4	2414
AT1G16240	SYNTAXIN OF PLANTS 51 (SYP51)	Chr1	5555941	5557968	270.1	2701
AT1G16250	Galactose oxidase/kelch repeat superfamily protein	Chr1	5555941	5557968	245	2450
AT1G16260	Wall-associated kinase family protein	Chr1	5561497	5562125	70.8	708
AT1G16270	kinase superfamily with octicosapeptide/Phox/Bem1p domain-containing protein	Chr1	5563025	5564062	288.3	2883
AT1G16280	RNA HELICASE 36 (RH36)	Chr1	5569431	5570725	254.8	2548
AT1G16300	GLYCERALDEHYDE-3-PHOSPHATE DEHYDROGENASE OF PLASTID 2 (GAPCP-2)	Chr1	5573510	5575036	195.4	1954
AT1G16310	Cation efflux family protein	Chr1	5578410	5578938	49.7	497
AT1G16320	plant/protein (DUF2358)	Chr1	5580685	5581948	318.1	3181
AT1G16340	(ATKDSA2)	Chr1	5589987	5592073	155.5	1555
AT1G16350	Aldolase-type TIM barrel family protein	Chr1	5589987	5592073	252.5	2525
AT1G16370	ORGANIC CATION/CARNITINE TRANSPORTER 6 (OCT6)	Chr1	5596753	5597639	45.6	456
AT1G16430	Surfeit locus protein 5 subunit 22 of Mediator complex	Chr1	5614424	5615401	238.6	2386
AT1G16445	S-adenosyl-L-methionine-dependent methyltransferases superfamily protein	Chr1	5617694	5618309	127.6	1276
AT1G16460	RHODANESE HOMOLOGUE 2 (RDH2)	Chr1	5621914	5623668	207.5	2075
AT1G16470	PROTEASOME SUBUNIT PAB1 (PAB1)	Chr1	5621914	5623668	275.6	2756
AT1G16489		Chr1	5627973	5630622	114.2	1142
AT1G16500	filamentous hemagglutinin transporter	Chr1	5638905	5640155	258.1	2581
AT1G16510	SAUR41; SMALL AUXIN UPREGULATED 41	Chr1	5644550	5645431	244.4	2444
AT1G16520	interactor of constitutive active ROPs protein	Chr1	5648592	5649630	289.4	2894
AT1G16540	ABA DEFICIENT 3 (ABA3)	Chr1	5659269	5660148	266.5	2665
AT1G16560	Per1-like family protein	Chr1	5668242	5669077	204.2	2042
AT1G16570	UDP-Glycosyltransferase superfamily protein	Chr1	5672877	5674367	191.2	1912
AT1G16590	(REV7)	Chr1	5672877	5674367	79.8	798
AT1G16610	ARGININE/SERINE-RICH 45 (SR45)	Chr1	5677777	5678934	298.6	2986
AT1G16630	transmembrane protein	Chr1	5683464	5684837	56.6	566
AT1G16635		Chr1	5685611	5686407	114.1	1141
AT1G16640	AP2/B3-like transcriptional factor family protein	Chr1	5686582	5687213	53.3	533
AT1G16650	S-adenosyl-L-methionine-dependent methyltransferases superfamily protein	Chr1	5687847	5688648	188.3	1883
AT1G16670	COLD-RESPONSIVE PROTEIN KINASE 1; CRPK1	Chr1	5697158	5698466	304.6	3046
AT1G16690	Enhancer of polycomb-like transcription factor protein	Chr1	5705674	5706628	131.3	1313
AT1G16700	Alpha-helical ferredoxin	Chr1	5709554	5710487	203.4	2034
AT1G16710	HISTONE ACETYLTRANSFERASE OF THE CBP FAMILY 12 (HAC12)	Chr1	5713856	5715030	277.8	2778
AT1G16720	HIGH CHLOROPHYLL FLUORESCENCE PHENOTYPE 173 (HCF173)	Chr1	5722803	5723996	274.1	2741
AT1G16730	UNKNOWN PROTEIN 6 (UP6)	Chr1	5726791	5727338	43.8	438
AT1G16740	Ribosomal protein L20	Chr1	5727518	5728473	265.3	2653
AT1G16770	hypothetical protein	Chr1	5738036	5738981	109.2	1092
AT1G16780	(VHP2;2)	Chr1	5743538	5745326	70.7	707
AT1G16790	ribosomal protein-like protein	Chr1	5743538	5745326	341.9	3419
AT1G16800	P-loop containing nucleoside triphosphate hydrolases superfamily protein	Chr1	5754627	5756112	191.7	1917
AT1G16810	7-dehydrocholesterol reductase-like protein	Chr1	5754627	5756112	56.9	569
AT1G16820	vacuolar ATP synthase catalytic subunit-related / V-ATPase-related / vacuolar proton pump-like protein	Chr1	5757773	5758265	46.7	467
AT1G16825	Reticulon family protein	Chr1	5758757	5759358	76.4	764
AT1G16830	Pentatricopeptide repeat (PPR) superfamily protein	Chr1	5760573	5761465	101.8	1018
AT1G16840	hypothetical protein	Chr1	5762964	5764109	85.2	852
AT1G16860	Ubiquitin-specific protease family C19-related protein	Chr1	5767255	5769442	98.7	987
AT1G16870	mitochondrial 28S ribosomal protein S29-like protein	Chr1	5772443	5773334	124	1240
AT1G16880	ACT DOMAIN REPEATS 11 (ACR11)	Chr1	5773560	5774527	128.9	1289
AT1G16890	UBIQUITIN-CONJUGATING ENZYME 36 (UBC36)	Chr1	5777575	5778544	157.4	1574
AT1G16900	EMS-MUTAGENIZED BRI1 SUPPRESSOR 3 (EBS3)	Chr1	5781578	5782513	222.2	2222
AT1G16916	transmembrane protein	Chr1	5786422	5787876	109.4	1094
AT1G16920	RAB GTPASE HOMOLOG A1B (RABA1b)	Chr1	5788326	5789382	225.3	2253
AT1G16930	F-box/RNI-like/FBD-like domains-containing protein	Chr1	5789749	5790402	47.6	476
AT1G16970	KU70 HOMOLOG (KU70)	Chr1	5805006	5805952	246.1	2461
AT1G17020	SENESCENCE-RELATED GENE 1 (SRG1)	Chr1	5820176	5821208	82.5	825
AT1G17040	SH2 DOMAIN PROTEIN A (SHA)	Chr1	5824785	5825711	139.6	1396
AT1G17050	SOLANESYL DIPHOSPHATE SYNTHASE 2 (SPS2)	Chr1	5828887	5830134	191.7	1917
AT1G17060	CYTOCHROME P450 72C1 (CYP72C1)	Chr1	5834126	5835441	64.6	646
AT1G17070	GC-rich sequence DNA-binding factor-like protein with Tuftelin interacting domain-containing protein	Chr1	5837464	5838319	140.8	1408
AT1G17080	Ribosomal protein L18ae family	Chr1	5840838	5841708	162.5	1625
AT1G17090	transmembrane protein	Chr1	5842211	5842923	89.1	891
AT1G17100	SOUL heme-binding family protein	Chr1	5844624	5845459	99.4	994
AT1G17110	UBIQUITIN-SPECIFIC PROTEASE 15 (UBP15)	Chr1	5849961	5850893	166.6	1666
AT1G17120	CATIONIC AMINO ACID TRANSPORTER 8 (CAT8)	Chr1	5851782	5852792	186.2	1862
AT1G17130	coiled-coil protein (DUF572)	Chr1	5854020	5854930	144.1	1441
AT1G17140	INTERACTOR OF CONSTITUTIVE ACTIVE ROPS 1 (ICR1)	Chr1	5857122	5858334	65.2	652
AT1G17145	RING/U-box superfamily protein	Chr1	5861835	5862794	255.9	2559
AT1G17147	VQ motif-containing protein	Chr1	5863602	5864082	70.2	702
AT1G17160	RBSK; RIBOKINASE	Chr1	5867477	5868610	225.5	2255
AT1G17170	GLUTATHIONE S-TRANSFERASE TAU 24 (GSTU24)	Chr1	5869623	5870902	192.1	1921
AT1G17190	GLUTATHIONE S-TRANSFERASE TAU 26 (GSTU26)	Chr1	5875371	5876090	57.2	572
AT1G17210	IAP-LIKE PROTEIN 1 (ILP1)	Chr1	5883817	5886068	288	2880
AT1G17220	FU-GAERI1 (FUG1)	Chr1	5883817	5886068	244.2	2442
AT1G17230	Leucine-rich receptor-like protein kinase family protein	Chr1	5890945	5892488	127.6	1276
AT1G17240	RECEPTOR LIKE PROTEIN 2 (RLP2)	Chr1	5897921	5898740	89.4	894
AT1G17250	RECEPTOR LIKE PROTEIN 3 (RLP3)	Chr1	5901477	5903442	150.9	1509
AT1G17255		Chr1	5901477	5903442	150.9	1509
AT1G17270	O-fucosyltransferase family protein	Chr1	5910759	5911855	328.1	3281
AT1G17280	UBIQUITIN-CONJUGATING ENZYME 34 (UBC34)	Chr1	5919333	5920122	149.7	1497
AT1G17290	ALANINE AMINOTRANSFERAS (AlaAT1)	Chr1	5922615	5925217	142.8	1428
AT1G17330	Metal-dependent phosphohydrolase	Chr1	5929682	5930633	315.2	3152
AT1G17340	SAC5; SUPPRESSOR OF ACTIN 5	Chr1	5933767	5934581	198.1	1981
AT1G17350	NADH:ubiquinone oxidoreductase intermediate-associated protein 30	Chr1	5941636	5942535	234.2	2342
AT1G17360	LOW protein: protein phosphatase 1 regulatory subunit-like protein	Chr1	5946504	5947788	332.2	3322
AT1G17370	OLIGOURIDYLATE BINDING PROTEIN 1B (UBP1B)	Chr1	5953931	5955086	263.6	2636
AT1G17380	JASMONATE-ZIM-DOMAIN PROTEIN 5 (JAZ5)	Chr1	5955642	5957214	145.6	1456
AT1G17410	Nucleoside diphosphate kinase family protein	Chr1	5969090	5970112	328.9	3289
AT1G17420	LIPOXYGENASE 3 (LOX3)	Chr1	5977463	5978229	42.7	427
AT1G17430	alpha/beta-Hydrolases superfamily protein	Chr1	5982223	5983174	181.4	1814
AT1G17440	ENHANCED ETHYLENE RESPONSE 4 (EER4)	Chr1	5986466	5987917	275.7	2757
AT1G17450	B-block binding subunit of TFIIIC	Chr1	5995943	5997922	260.5	2605
AT1G17455	ELF4-LIKE 4 (ELF4-L4)	Chr1	5995943	5997922	209.8	2098
AT1G17460	TRF-LIKE 3 (TRFL3)	Chr1	5998767	5999364	89.1	891
AT1G17470	DEVELOPMENTALLY REGULATED G-PROTEIN 1 (DRG1)	Chr1	6002795	6003658	186.1	1861
AT1G17480	IQ-DOMAIN 7 (IQD7)	Chr1	6007196	6009406	129.8	1298
AT1G17490	epidermal patterning factor-like protein	Chr1	6007196	6009406	247.6	2476
AT1G17510	hypothetical protein	Chr1	6023648	6024400	149.7	1497
AT1G17520	Homeodomain-like/winged-helix DNA-binding family protein	Chr1	6026675	6028575	203.4	2034
AT1G17530	TRANSLOCASE OF INNER MITOCHONDRIAL MEMBRANE 23 (TIM23-1)	Chr1	6026675	6028575	234.5	2345
AT1G17550	HOMOLOGY TO ABI2 (HAB2)	Chr1	6034228	6035657	224.4	2244
AT1G17560	HUELLENLOS (HLL)	Chr1	6038020	6038711	78.4	784
AT1G17580	MYOSIN 1 (MYA1)	Chr1	6039087	6040029	214.8	2148
AT1G17590	"NUCLEAR FACTOR Y, SUBUNIT A8" (NF-YA8)	Chr1	6051716	6054000	231.9	2319
AT1G17600	Disease resistance protein (TIR-NBS-LRR class) family	Chr1	6051716	6054000	59.6	596
AT1G17620	Late embryogenesis abundant (LEA) hydroxyproline-rich glycoprotein family	Chr1	6062056	6063324	295.9	2959
AT1G17630	CELL WALL MAINTAINER 1; CWM1	Chr1	6064450	6065315	189.8	1898
AT1G17640	RNA-binding (RRM/RBD/RNP motifs) family protein	Chr1	6068544	6069344	141.2	1412
AT1G17650	GLYOXYLATE REDUCTASE 2 (GLYR2)	Chr1	6071321	6072108	121.4	1214
AT1G17665	CA-responsive protein	Chr1	6073512	6074636	210.6	2106
AT1G17680	tetratricopeptide repeat (TPR)-containing protein	Chr1	6075975	6076900	174.9	1749
AT1G17690	NUCLEOLAR FACTOR 1 (NOF1)	Chr1	6087395	6088510	340.3	3403
AT1G17720	(ATB BETA)	Chr1	6097435	6098397	175.9	1759
AT1G17730	VACUOLAR PROTEIN SORTING 46.1 (VPS46.1)	Chr1	6099001	6099965	169.2	1692
AT1G17744	hypothetical protein	Chr1	6101041	6101998	149.4	1494
AT1G17745	3-PHOSPHOGLYCERATE DEHYDROGENASE (PGDH)	Chr1	6101041	6101998	149.4	1494
AT1G17750	PEP1 RECEPTOR 2 (PEPR2)	Chr1	6106334	6108606	202.4	2024
AT1G17760	(CSTF77)	Chr1	6115746	6116741	292.2	2922
AT1G17780	transmembrane protein	Chr1	6123520	6124752	201.4	2014
AT1G17790	DNA-binding bromodomain-containing protein	Chr1	6126434	6127613	274.8	2748
AT1G17820	testis-expressed sequence 2-like protein (DUF2404)	Chr1	6134401	6135452	291.6	2916
AT1G17830	hypothetical protein (DUF789)	Chr1	6136695	6138344	45.7	457
AT1G17840	ATP-BINDING CASSETTE G11 (ABCG11)	Chr1	6142614	6144665	198.8	1988
AT1G17850	Rhodanese/Cell cycle control phosphatase superfamily protein	Chr1	6148087	6148894	136.9	1369
AT1G17860	Kunitz family trypsin and protease inhibitor protein	Chr1	6149302	6149991	86.2	862
AT1G17880	BASIC TRANSCRIPTION FACTOR 3 (BTF3)	Chr1	6152989	6154053	174.5	1745
AT1G17890	(GER2)	Chr1	6154827	6155833	213.8	2138
AT1G17920	HOMEODOMAIN GLABROUS 12 (HDG12)	Chr1	6164584	6165895	218	2180
AT1G17930	MAIN; MAINTENANCE OF MERISTEMS	Chr1	6168076	6168930	177.2	1772
AT1G17940	Endosomal targeting BRO1-like domain-containing protein	Chr1	6172165	6173302	208	2080
AT1G17960	Threonyl-tRNA synthetase	Chr1	6182946	6183742	41	410
AT1G17970	RING/U-box superfamily protein	Chr1	6184788	6185767	286.7	2867
AT1G17980	POLY(A) POLYMERASE 1 (PAPS1)	Chr1	6190827	6191896	258.7	2587
AT1G18000	Major facilitator superfamily protein	Chr1	6195098	6196170	144.5	1445
AT1G18010	Major facilitator superfamily protein	Chr1	6199867	6200919	144	1440
AT1G18030	Protein phosphatase 2C family protein	Chr1	6204152	6205131	211.6	2116
AT1G18040	CYCLIN-DEPENDENT KINASE D1;3 (CDKD1;3)	Chr1	6208693	6209624	213.3	2133
AT1G18060	microbial collagenase	Chr1	6212504	6213410	53.9	539
AT1G18070	Translation elongation factor EF1A/initiation factor IF2gamma family protein	Chr1	6217512	6218439	205.5	2055
AT1G18075	MICRORNA159B (MIR159B)	Chr1	6220371	6220970	50.3	503
AT1G18080	(ATARCA)	Chr1	6222140	6223635	162.3	1623
AT1G18090	5'-3' exonuclease family protein	Chr1	6226956	6227750	100.7	1007
AT1G18100	(E12A11)	Chr1	6226956	6227750	100.7	1007
AT1G18140	LACCASE 1 (LAC1)	Chr1	6238930	6240248	337	3370
AT1G18150	(ATMPK8)	Chr1	6246707	6247810	212.2	2122
AT1G18160	Protein kinase superfamily protein	Chr1	6248641	6249901	246.8	2468
AT1G18170	FKBP-like peptidyl-prolyl cis-trans isomerase family protein	Chr1	6254100	6254858	236.4	2364
AT1G18190	GOLGIN CANDIDATE 2 (GC2)	Chr1	6260634	6261610	302	3020
AT1G18210	Calcium-binding EF-hand family protein	Chr1	6267772	6268955	227.7	2277
AT1G18250	(ATLP-1)	Chr1	6276874	6278074	207.4	2074
AT1G18260	EMS-MUTAGENIZED BRI1 SUPPRESSOR 5 (EBS5)	Chr1	6280867	6283070	215.1	2151
AT1G18265	zein-binding protein (Protein of unknown function%2C DUF593)	Chr1	6280867	6283070	52.1	521
AT1G18270	ketose-bisphosphate aldolase class-II family protein	Chr1	6293064	6294037	229	2290
AT1G18280	GLYCOSYLPHOSPHATIDYLINOSITOL-ANCHORED LIPID PROTEIN TRANSFER 3; LTPG3	Chr1	6294248	6294805	51.8	518
AT1G18290	DUF4228 domain protein	Chr1	6297343	6298064	141.9	1419
AT1G18300	NUDIX HYDROLASE HOMOLOG 4 (NUDT4)	Chr1	6299647	6300765	150.3	1503
AT1G18320	Mitochondrial import inner membrane translocase subunit Tim17/Tim22/Tim23 family protein	Chr1	6304129	6305010	194.5	1945
AT1G18330	EARLY-PHYTOCHROME-RESPONSIVE1 (EPR1)	Chr1	6307139	6308029	130.9	1309
AT1G18335	Acyl-CoA N-acyltransferases (NAT) superfamily protein	Chr1	6310703	6311440	150	1500
AT1G18340	basal transcription factor complex subunit-like protein	Chr1	6313162	6314073	227.8	2278
AT1G18360	alpha/beta-Hydrolases superfamily protein	Chr1	6318484	6319505	256.4	2564
AT1G18390	LEAF RUST 10 DISEASE-RESISTANCE LOCUS RECEPTOR- LIKE PROTEIN KINASE-LIKE 1.1; LRK10L1.1	Chr1	6325769	6326773	160.9	1609
AT1G18415		Chr1	6344790	6346748	164.8	1648
AT1G18420	aluminum activated malate transporter family protein	Chr1	6344790	6346748	164.8	1648
AT1G18440	Peptidyl-tRNA hydrolase family protein	Chr1	6344790	6346748	176.6	1766
AT1G18450	ACTIN-RELATED PROTEIN 4 (ARP4)	Chr1	6347983	6348857	150.7	1507
AT1G18460	alpha/beta-Hydrolases superfamily protein	Chr1	6352305	6353371	234.9	2349
AT1G18470	Transmembrane Fragile-X-F-associated protein	Chr1	6359240	6360317	211.1	2111
AT1G18480	SHEWENELLA-LIKE PROTEIN PHOSPHATASE 2 (SLP2)	Chr1	6361465	6362567	215	2150
AT1G18490	PCO3; PLANT CYSTEINE OXIDASE 3	Chr1	6366962	6367724	146.3	1463
AT1G18500	METHYLTHIOALKYLMALATE SYNTHASE-LIKE 4 (MAML-4)	Chr1	6369080	6370631	271.6	2716
AT1G18540	Ribosomal protein L6 family protein	Chr1	6377504	6378785	359.3	3593
AT1G18550	ATP binding microtubule motor family protein	Chr1	6383532	6384539	181.1	1811
AT1G18560	BED zinc finger and hAT dimerization domain-containing protein	Chr1	6385203	6386231	157.2	1572
AT1G18570	MYB DOMAIN PROTEIN 51 (MYB51)	Chr1	6389410	6391007	112.7	1127
AT1G18580	GALACTURONOSYLTRANSFERASE 11 (GAUT11)	Chr1	6395753	6396865	247.9	2479
AT1G18590	SULFOTRANSFERASE 17 (SOT17)	Chr1	6398705	6399327	40.1	401
AT1G18600	RHOMBOID-LIKE PROTEIN 12 (RBL12)	Chr1	6400317	6401405	211.1	2111
AT1G18610	Galactose oxidase/kelch repeat superfamily protein	Chr1	6405482	6406610	261.4	2614
AT1G18620	TON1 RECRUITING MOTIF 3 (TRM3)	Chr1	6409824	6410922	47.4	474
AT1G18630	GLYCINE-RICH RNA-BINDING PROTEIN 6 (GR-RBP6)	Chr1	6414509	6415460	156.5	1565
AT1G18640	3-PHOSPHOSERINE PHOSPHATASE (PSP)	Chr1	6418036	6418781	108	1080
AT1G18650	PLASMODESMATA CALLOSE-BINDING PROTEIN 3 (PDCB3)	Chr1	6419666	6420664	141.3	1413
AT1G18660	zinc finger (C3HC4-type RING finger) family protein	Chr1	6421007	6421977	201.2	2012
AT1G18670	IMPAIRED IN BABA-INDUCED STERILITY 1 (IBS1)	Chr1	6429116	6430977	170.8	1708
AT1G18680	HNH endonuclease domain-containing protein	Chr1	6432651	6434103	104	1040
AT1G18690	XYLOGLUCAN XYLOSYLTRANSFERASE 4 (XXT4)	Chr1	6432651	6434103	54.6	546
AT1G18700	DNAJ heat shock N-terminal domain-containing protein	Chr1	6437385	6438318	248.2	2482
AT1G18720	ER membrane protein%2C putative (DUF962)	Chr1	6458705	6459917	341.7	3417
AT1G18740	ROH1%2C putative (DUF793)	Chr1	6463966	6467520	155.2	1552
AT1G18745		Chr1	6463966	6467520	128.7	1287
AT1G18750	AGAMOUS-LIKE 65 (AGL65)	Chr1	6463966	6467520	125.4	1254
AT1G18773	acyl thioesterase-like protein	Chr1	6474656	6475468	249.8	2498
AT1G18800	NAP1-RELATED PROTEIN 2 (NRP2)	Chr1	6482782	6483788	288.3	2883
AT1G18840	IQ-DOMAIN 30 (IQD30)	Chr1	6503402	6504682	171.6	1716
AT1G18850	hypothetical protein	Chr1	6505537	6506593	303.3	3033
AT1G18890	CALCIUM-DEPENDENT PROTEIN KINASE 1 (CDPK1)	Chr1	6524584	6526062	274.2	2742
AT1G18900	Pentatricopeptide repeat (PPR) superfamily protein	Chr1	6528878	6529752	214.1	2141
AT1G18910	zinc ion binding protein	Chr1	6537267	6538271	316	3160
AT1G18940	Nodulin-like / Major Facilitator Superfamily protein	Chr1	6543715	6544406	168.8	1688
AT1G18950	DDT domain superfamily	Chr1	6546099	6547536	318.9	3189
AT1G19000	Homeodomain-like superfamily protein	Chr1	6561338	6562899	250.1	2501
AT1G19010	hypothetical protein	Chr1	6565475	6566247	124.2	1242
AT1G19020	CDP-diacylglycerol-glycerol-3-phosphate 3-phosphatidyltransferase	Chr1	6567985	6569711	74.8	748
AT1G19025	DNA repair metallo-beta-lactamase family protein	Chr1	6567985	6569711	196.9	1969
AT1G19050	RESPONSE REGULATOR 7 (ARR7)	Chr1	6577878	6579342	239.3	2393
AT1G19070	F-box family protein	Chr1	6584065	6585710	285.9	2859
AT1G19080	TITAN 10 (TTN10)	Chr1	6584065	6585710	285.9	2859
AT1G19100	DEFECTIVE IN MERISTEM SILENCING 11 (DMS11)	Chr1	6594716	6595893	342.7	3427
AT1G19110	inter-alpha-trypsin inhibitor heavy chain-like protein	Chr1	6601946	6603264	300	3000
AT1G19120	Small nuclear ribonucleoprotein family protein	Chr1	6608021	6608856	116.8	1168
AT1G19130	RmlC-like jelly roll fold protein	Chr1	6609831	6610705	127	1270
AT1G19140	ubiquinone biosynthesis COQ9-like protein	Chr1	6611710	6612584	142	1420
AT1G19170	Pectin lyase-like superfamily protein	Chr1	6616526	6617742	257.3	2573
AT1G19180	JASMONATE-ZIM-DOMAIN PROTEIN 1 (JAZ1)	Chr1	6622138	6623492	112.2	1122
AT1G19190	alpha/beta-Hydrolases superfamily protein	Chr1	6623771	6624884	123.6	1236
AT1G19200	cyclin-dependent kinase%2C putative (DUF581)	Chr1	6625217	6625999	85.3	853
AT1G19220	AUXIN RESPONSE FACTOR 19 (ARF19)	Chr1	6630756	6633108	229	2290
AT1G19230	Riboflavin synthase-like superfamily protein	Chr1	6643929	6645040	243.1	2431
AT1G19240	transmembrane protein	Chr1	6649664	6650622	325.7	3257
AT1G19270	DA1 (DA1)	Chr1	6662422	6663678	231.3	2313
AT1G19290	Pentatricopeptide repeat (PPR) superfamily protein	Chr1	6665948	6666972	258.1	2581
AT1G19300	PARVUS (PARVUS)	Chr1	6671267	6672712	353.4	3534
AT1G19310	RING/U-box superfamily protein	Chr1	6677005	6677784	172.7	1727
AT1G19330	histone deacetylase complex subunit	Chr1	6682412	6683636	227.6	2276
AT1G19340	Methyltransferase MT-A70 family protein	Chr1	6684660	6685556	143.3	1433
AT1G19350	BRI1-EMS-SUPPRESSOR 1 (BES1)	Chr1	6688630	6689869	156.6	1566
AT1G19360	REDUCED RESIDUAL ARABINOSE 3 (RRA3)	Chr1	6691609	6692532	152.7	1527
AT1G19370	membrane protein	Chr1	6693927	6695027	150.8	1508
AT1G19380	sugar%2C putative (DUF1195)	Chr1	6697898	6698760	173.8	1738
AT1G19394	hypothetical protein	Chr1	6709645	6710757	203.7	2037
AT1G19396	hypothetical protein	Chr1	6709645	6710757	203.7	2037
AT1G19400	Erythronate-4-phosphate dehydrogenase family protein	Chr1	6713313	6714598	252.5	2525
AT1G19430	S-adenosyl-L-methionine-dependent methyltransferases superfamily protein	Chr1	6726769	6728046	223.5	2235
AT1G19440	3-KETOACYL-COA SYNTHASE 4 (KCS4)	Chr1	6728740	6730018	205.8	2058
AT1G19450	Major facilitator superfamily protein	Chr1	6733998	6735016	195.3	1953
AT1G19480	DNA glycosylase superfamily protein	Chr1	6744269	6745577	290.7	2907
AT1G19485	Transducin/WD40 repeat-like superfamily protein	Chr1	6746664	6747544	236.2	2362
AT1G19490	Basic-leucine zipper (bZIP) transcription factor family protein	Chr1	6753151	6754218	326.5	3265
AT1G19520	NUCLEAR FUSION DEFECTIVE 5 (NFD5)	Chr1	6759816	6761305	230.2	2302
AT1G19530	DNA polymerase epsilon catalytic subunit A	Chr1	6763915	6765033	94.5	945
AT1G19540	NmrA-like negative transcriptional regulator family protein	Chr1	6765613	6766632	68.4	684
AT1G19570	DEHYDROASCORBATE REDUCTASE (DHAR1)	Chr1	6773695	6775588	175.8	1758
AT1G19580	GAMMA CARBONIC ANHYDRASE 1 (GAMMA CA1)	Chr1	6773695	6775588	211.8	2118
AT1G19600	pfkB-like carbohydrate kinase family protein	Chr1	6778828	6780094	235.2	2352
AT1G19620	transmembrane protein	Chr1	6784240	6785114	74.3	743
AT1G19650	Sec14p-like phosphatidylinositol transfer family protein	Chr1	6796472	6797218	40.6	406
AT1G19660	ATBBD2; BBD2; BIFUNCTIONAL NUCLEASE IN BASAL DEFENSE RESPONSE 2	Chr1	6801882	6802690	67.8	678
AT1G19680	RING/U-box superfamily protein	Chr1	6805342	6806436	223	2230
AT1G19690	NAD(P)-binding Rossmann-fold superfamily protein	Chr1	6808880	6809718	187	1870
AT1G19700	BEL1-LIKE HOMEODOMAIN 10 (BEL10)	Chr1	6811328	6812441	106.4	1064
AT1G19710	UDP-Glycosyltransferase superfamily protein	Chr1	6814645	6815813	289.4	2894
AT1G19720	Pentatricopeptide repeat (PPR-like) superfamily protein	Chr1	6822024	6822769	96.4	964
AT1G19740	ATP-dependent protease La (LON) domain protein	Chr1	6823666	6825644	202.8	2028
AT1G19750	Transducin/WD40 repeat-like superfamily protein	Chr1	6826897	6827421	50.2	502
AT1G19770	PURINE PERMEASE 14 (PUP14)	Chr1	6832240	6834093	278.8	2788
AT1G19790	SHI-RELATED SEQUENCE 7 (SRS7)	Chr1	6838354	6840359	302.4	3024
AT1G19800	ATP-BINDING CASSETTE I14 (ABCI14)	Chr1	6846229	6847101	255.1	2551
AT1G19835	filament-like protein (DUF869)	Chr1	6858619	6860442	266.5	2665
AT1G19840	SAUR53; SMALL AUXIN UPREGULATED RNA 53	Chr1	6872196	6873511	341.1	3411
AT1G19850	MONOPTEROS (MP)	Chr1	6886683	6889179	214.3	2143
AT1G19860	Zinc finger C-x8-C-x5-C-x3-H type family protein	Chr1	6893955	6894850	233.8	2338
AT1G19870	IQ-DOMAIN 32 (iqd32)	Chr1	6897683	6898760	241	2410
AT1G19880	Regulator of chromosome condensation (RCC1) family protein	Chr1	6903077	6904223	354.7	3547
AT1G19910	(AVA-P2)	Chr1	6913081	6914218	278.5	2785
AT1G19920	(APS2)	Chr1	6915681	6916887	259.4	2594
AT1G19950	HVA22-LIKE PROTEIN H (ATHVA22H) (HVA22H)	Chr1	6924039	6924952	210.2	2102
AT1G19960	transcription factor	Chr1	6927950	6928603	67.9	679
AT1G19970	ER lumen protein retaining receptor family protein	Chr1	6932048	6933995	161.6	1616
AT1G19980	cytomatrix protein-like protein	Chr1	6932048	6933995	187	1870
AT1G19990	nucleolin	Chr1	6935143	6936088	148.9	1489
AT1G20030	Pathogenesis-related thaumatin superfamily protein	Chr1	6945682	6946561	201.6	2016
AT1G20050	HYDRA1 (HYD1)	Chr1	6948956	6950063	265.5	2655
AT1G20060	ATP binding microtubule motor family protein	Chr1	6955403	6957132	272.2	2722
AT1G20065	DNA-directed RNA polymerase I subunit RPA12-like protein	Chr1	6955403	6957132	111.5	1115
AT1G20090	RHO-RELATED PROTEIN FROM PLANTS 2 (ROP2)	Chr1	6966898	6967962	118.7	1187
AT1G20100	DNA ligase-like protein	Chr1	6969399	6970945	95.4	954
AT1G20110	FREE1; FYVE DOMAIN PROTEIN REQUIRED FOR ENDOSOMAL SORTING 1; FYVE-DOMAIN PROTEIN 1; FYVE1	Chr1	6971430	6972935	107.4	1074
AT1G20140	SKP1-LIKE 4 (SK4)	Chr1	6986181	6987396	337	3370
AT1G20200	EMBRYO DEFECTIVE 2719 (emb2719)	Chr1	7003411	7004485	263.9	2639
AT1G20220	Alba DNA/RNA-binding protein	Chr1	7006842	7007688	155.3	1553
AT1G20225	Thioredoxin superfamily protein	Chr1	7008692	7010418	186.4	1864
AT1G20230	Pentatricopeptide repeat (PPR) superfamily protein	Chr1	7008692	7010418	168.9	1689
AT1G20260	V-ATPASE B SUBUNIT 3 (VAB3)	Chr1	7016593	7017475	296.9	2969
AT1G20270	2-oxoglutarate (2OG) and Fe(II)-dependent oxygenase superfamily protein	Chr1	7021485	7023254	335.4	3354
AT1G20300	Pentatricopeptide repeat (PPR) superfamily protein	Chr1	7029462	7030655	353.9	3539
AT1G20310	syringolide-induced protein	Chr1	7032197	7032958	100	1000
AT1G20330	STEROL METHYLTRANSFERASE 2 (SMT2)	Chr1	7038631	7040228	261.6	2616
AT1G20340	DNA-DAMAGE-REPAIR/TOLERATION PROTEIN 112 (DRT112)	Chr1	7042783	7043333	50.3	503
AT1G20350	TRANSLOCASE INNER MEMBRANE SUBUNIT 17-1 (TIM17-1)	Chr1	7043704	7044325	52.6	526
AT1G20370	Pseudouridine synthase family protein	Chr1	7052693	7053868	361.5	3615
AT1G20375	MICRORNA394A (MIR394A)	Chr1	7057948	7058613	59.7	597
AT1G20380	Prolyl oligopeptidase family protein	Chr1	7061885	7062876	246.8	2468
AT1G20410	Pseudouridine synthase family protein	Chr1	7081709	7082674	258.8	2588
AT1G20430	hypothetical protein	Chr1	7083039	7084010	261.7	2617
AT1G20450	EARLY RESPONSIVE TO DEHYDRATION 10 (ERD10)	Chr1	7088251	7089222	83.6	836
AT1G20460	NADH-ubiquinone oxidoreductase chain	Chr1	7091124	7092030	245.7	2457
AT1G20480	AMP-dependent synthetase and ligase family protein	Chr1	7095787	7097217	196.1	1961
AT1G20490	AMP-dependent synthetase and ligase family protein	Chr1	7098520	7099651	147.9	1479
AT1G20510	OPC-8:0 COA LIGASE1 (OPCL1)	Chr1	7104368	7106408	240	2400
AT1G20540	Transducin/WD40 repeat-like superfamily protein	Chr1	7112414	7113381	261.9	2619
AT1G20550	O-fucosyltransferase family protein	Chr1	7117392	7118287	176.4	1764
AT1G20560	ACYL ACTIVATING ENZYME 1 (AAE1)	Chr1	7120587	7121992	214.4	2144
AT1G20570	Spc97 / Spc98 family of spindle pole body (SBP) component	Chr1	7126040	7126699	88	880
AT1G20575	DOLICHOL PHOSPHATE MANNOSE SYNTHASE 1 (DPMS1)	Chr1	7128017	7129697	208.3	2083
AT1G20580	Small nuclear ribonucleoprotein family protein	Chr1	7128017	7129697	245.2	2452
AT1G20610	CYCLIN B2;3 (CYCB2;3)	Chr1	7136232	7137822	80.4	804
AT1G20620	CATALASE 3 (CAT3)	Chr1	7143127	7145847	163.9	1639
AT1G20630	CATALASE 1 (CAT1)	Chr1	7146589	7147495	107.9	1079
AT1G20640	NIN-LIKE PROTEIN 4; NLP4	Chr1	7154349	7155779	300.1	3001
AT1G20650	ALTERED SEED GERMINATION 5 (ASG5)	Chr1	7159473	7160513	193.1	1931
AT1G20670	DNA-binding bromodomain-containing protein	Chr1	7166905	7168143	360.8	3608
AT1G20690	SWI-SNF-related chromatin binding protein	Chr1	7175403	7176430	106.3	1063
AT1G20691		Chr1	7175403	7176430	106.3	1063
AT1G20693	HIGH MOBILITY GROUP B2 (HMGB2)	Chr1	7176764	7177928	131.1	1311
AT1G20696	HIGH MOBILITY GROUP B3 (HMGB3)	Chr1	7179437	7180763	121.8	1218
AT1G20700	WUSCHEL RELATED HOMEOBOX 14 (WOX14)	Chr1	7182518	7183169	49	490
AT1G20720	RAD3-like DNA-binding helicase protein	Chr1	7192096	7192973	262	2620
AT1G20760	Calcium-binding EF hand family protein	Chr1	7209205	7210279	347.5	3475
AT1G20770	coiled-coil protein	Chr1	7216006	7218144	244.9	2449
AT1G20780	SENESCENCE-ASSOCIATED E3 UBIQUITIN LIGASE 1 (SAUL1)	Chr1	7216006	7218144	301	3010
AT1G20810	FKBP-like peptidyl-prolyl cis-trans isomerase family protein	Chr1	7231807	7232782	328.9	3289
AT1G20816	outer envelope pore-like protein	Chr1	7233569	7234421	212.4	2124
AT1G20823	ATATL80	Chr1	7238661	7239612	292.9	2929
AT1G20830	MULTIPLE CHLOROPLAST DIVISION SITE 1 (MCD1)	Chr1	7242754	7243740	234.1	2341
AT1G20840	TONOPLAST MONOSACCHARIDE TRANSPORTER1 (TMT1)	Chr1	7247386	7248317	90.1	901
AT1G20880	RNA-binding (RRM/RBD/RNP motifs) family protein	Chr1	7264219	7265557	243.4	2434
AT1G20890	caveolin-1 protein	Chr1	7266653	7267474	230	2300
AT1G20900	ESCAROLA (ESC)	Chr1	7272557	7274049	249.8	2498
AT1G20910	ARID/BRIGHT DNA-binding domain-containing protein	Chr1	7280357	7281350	315.2	3152
AT1G20920	P-loop containing nucleoside triphosphate hydrolases superfamily protein	Chr1	7284919	7286368	287.3	2873
AT1G20930	CYCLIN-DEPENDENT KINASE B2;2 (CDKB2;2)	Chr1	7293983	7294857	221	2210
AT1G20950	Phosphofructokinase family protein	Chr1	7300401	7301596	336.2	3362
AT1G20960	EMBRYO DEFECTIVE 1507 (emb1507)	Chr1	7308981	7310370	246.2	2462
AT1G20970	calponin-like domain protein	Chr1	7313869	7316079	199.4	1994
AT1G20980	SQUAMOSA PROMOTER BINDING PROTEIN-LIKE 14 (SPL14)	Chr1	7324449	7326277	329.8	3298
AT1G21000	PLATZ transcription factor family protein	Chr1	7337612	7339198	349.1	3491
AT1G21010	poly polymerase	Chr1	7346006	7347101	323.3	3233
AT1G21050	MIZU-KUSSEI-like protein (Protein of unknown function%2C DUF617)	Chr1	7366761	7367720	269.6	2696
AT1G21060	Serine/Threonine-kinase%2C putative (Protein of unknown function%2C DUF547)	Chr1	7371600	7372839	154	1540
AT1G21065	secondary thiamine-phosphate synthase enzyme	Chr1	7374204	7374986	127.3	1273
AT1G21070	UDP-RHA/UDP-GAL TRANSPORTER 2; URGT2	Chr1	7377222	7378259	201.9	2019
AT1G21080	DNAJ heat shock N-terminal domain-containing protein	Chr1	7381576	7382465	172.6	1726
AT1G21090	Cupredoxin superfamily protein	Chr1	7384667	7386203	132.9	1329
AT1G21150	Mitochondrial transcription termination factor family protein	Chr1	7406982	7407922	177.4	1774
AT1G21160	eukaryotic translation initiation factor 2 (eIF-2) family protein	Chr1	7411924	7413818	155.1	1551
AT1G21170	(SEC5B)	Chr1	7411924	7413818	326.6	3266
AT1G21190	LSM3A; SM-LIKE 3A	Chr1	7420063	7422142	297.5	2975
AT1G21200	sequence-specific DNA binding transcription factor	Chr1	7420063	7422142	280	2800
AT1G21280	Copia-like polyprotein/retrotransposon	Chr1	7447451	7448644	343.5	3435
AT1G21310	EXTENSIN 3 (EXT3)	Chr1	7453416	7454898	144.5	1445
AT1G21320	nucleic acid/nucleotide binding protein	Chr1	7462471	7463989	55.7	557
AT1G21326	VQ motif-containing protein	Chr1	7468930	7469764	110.3	1103
AT1G21350	Thioredoxin superfamily protein	Chr1	7478264	7479238	341.9	3419
AT1G21370	transmembrane protein	Chr1	7483740	7484897	284.6	2846
AT1G21380	Target of Myb protein 1	Chr1	7487900	7488716	128.4	1284
AT1G21390	EMBRYO DEFECTIVE 2170 (emb2170)	Chr1	7489337	7490714	190.3	1903
AT1G21410	(SKP2A)	Chr1	7496968	7497943	306.8	3068
AT1G21440	Phosphoenolpyruvate carboxylase family protein	Chr1	7503273	7504307	295.4	2954
AT1G21450	SCARECROW-LIKE 1 (SCL1)	Chr1	7508891	7510380	286.7	2867
AT1G21480	Exostosin family protein	Chr1	7520605	7521641	337	3370
AT1G21510	TPRXL	Chr1	7531555	7532553	55.4	554
AT1G21520	hypothetical protein	Chr1	7534235	7534918	138.2	1382
AT1G21560	hypothetical protein	Chr1	7554688	7555489	241.6	2416
AT1G21580	Zinc finger C-x8-C-x5-C-x3-H type family protein	Chr1	7564749	7565894	279.8	2798
AT1G21590	kinase with adenine nucleotide alpha hydrolases-like domain-containing protein	Chr1	7568960	7569953	124.4	1244
AT1G21600	PLASTID TRANSCRIPTIONALLY ACTIVE 6 (PTAC6)	Chr1	7572856	7574793	191.6	1916
AT1G21610	UBINUCLEIN 1; UBN1	Chr1	7572856	7574793	208	2080
AT1G21630	Calcium-binding EF hand family protein	Chr1	7580928	7582085	359.3	3593
AT1G21640	NAD KINASE 2 (NADK2)	Chr1	7588375	7589493	357.1	3571
AT1G21650	(SECA2)	Chr1	7599966	7600731	124	1240
AT1G21651	zinc ion binding protein	Chr1	7603344	7604371	216.6	2166
AT1G21660	Chaperone DnaJ-domain superfamily protein	Chr1	7605529	7606726	211.7	2117
AT1G21670	DPP6 amino-terminal domain protein	Chr1	7610441	7611983	68.6	686
AT1G21680	DPP6 N-terminal domain-like protein	Chr1	7612923	7614393	140.9	1409
AT1G21690	EMBRYO DEFECTIVE 1968 (emb1968)	Chr1	7615542	7616243	94	940
AT1G21695	hydroxyproline-rich glycoprotein family protein	Chr1	7619074	7619884	173.4	1734
AT1G21700	SWITCH/SUCROSE NONFERMENTING 3C (SWI3C)	Chr1	7623163	7625238	141.3	1413
AT1G21710	8-OXOGUANINE-DNA GLYCOSYLASE 1 (OGG1)	Chr1	7623163	7625238	168.5	1685
AT1G21720	PROTEASOME BETA SUBUNIT C1 (PBC1)	Chr1	7626231	7627158	125.8	1258
AT1G21730	KIN7.1; KINESIN 7.1	Chr1	7630076	7631089	298.5	2985
AT1G21740	DUF630 family protein%2C putative (DUF630 and DUF632)	Chr1	7641141	7643612	135.4	1354
AT1G21750	PDI-LIKE 1-1 (PDIL1-1)	Chr1	7645619	7646752	85.8	858
AT1G21770	Acyl-CoA N-acyltransferases (NAT) superfamily protein	Chr1	7651682	7653109	129.2	1292
AT1G21780	BTB/POZ domain-containing protein	Chr1	7651682	7653109	129.2	1292
AT1G21790	TRAM%2C LAG1 and CLN8 (TLC) lipid-sensing domain containing protein	Chr1	7654122	7654977	204.5	2045
AT1G21830	hypothetical protein	Chr1	7661292	7662727	154.6	1546
AT1G21840	UREASE ACCESSORY PROTEIN F (UREF)	Chr1	7666320	7667588	250.2	2502
AT1G21880	LYSM DOMAIN GPI-ANCHORED PROTEIN 1 PRECURSOR (LYM1)	Chr1	7680307	7681778	362.9	3629
AT1G21900	P24 SUBFAMILY DELTA 5; P24DELTA5	Chr1	7691591	7692536	281.2	2812
AT1G21910	DEHYDRATION RESPONSE ELEMENT-BINDING PROTEIN 26 (DREB26)	Chr1	7696463	7697448	168.6	1686
AT1G21920	Histone H3 K4-specific methyltransferase SET7/9 family protein	Chr1	7704472	7706295	329.1	3291
AT1G21930	transmembrane protein	Chr1	7712739	7713436	164.6	1646
AT1G21950	transmembrane protein	Chr1	7723344	7723955	97.2	972
AT1G21980	PHOSPHATIDYLINOSITOL-4-PHOSPHATE 5-KINASE 1 (PIP5K1)	Chr1	7734686	7737449	196.9	1969
AT1G21990	F-box/RNI-like/FBD-like domains-containing protein	Chr1	7740493	7742193	57.1	571
AT1G22020	SERINE HYDROXYMETHYLTRANSFERASE 6 (SHM6)	Chr1	7754138	7755631	297.4	2974
AT1G22030	BPS1-like protein	Chr1	7759232	7760670	285.6	2856
AT1G22040	Galactose oxidase/kelch repeat superfamily protein	Chr1	7767828	7768756	240.1	2401
AT1G22050	MEMBRANE-ANCHORED UBIQUITIN-FOLD PROTEIN 6 PRECURSOR (MUB6)	Chr1	7771506	7772495	231.9	2319
AT1G22060	sporulation-specific protein	Chr1	7780567	7781649	311.2	3112
AT1G22070	TGA1A-RELATED GENE 3 (TGA3)	Chr1	7789367	7790576	282	2820
AT1G22110	structural constituent of ribosome	Chr1	7801718	7802610	237.9	2379
AT1G22140	zinc finger CCCH domain protein	Chr1	7814855	7815777	262.7	2627
AT1G22160	senescence-associated family protein (DUF581)	Chr1	7823087	7823834	122.2	1222
AT1G22170	Phosphoglycerate mutase family protein	Chr1	7826203	7827168	181.6	1816
AT1G22180	Sec14p-like phosphatidylinositol transfer family protein	Chr1	7829416	7830448	187	1870
AT1G22190	RAP2.4; RELATED TO AP2 4; WIND2	Chr1	7835840	7837360	222.2	2222
AT1G22200	Endoplasmic reticulum vesicle transporter protein	Chr1	7839931	7840883	189.6	1896
AT1G22220	AUXIN UP-REGULATED F-BOX PROTEIN 2 (AUF2)	Chr1	7846525	7847701	302.4	3024
AT1G22230	nucleolar GTP-binding protein	Chr1	7849963	7851024	169.5	1695
AT1G22260	(ZYP1a)	Chr1	7864734	7866378	89.2	892
AT1G22270	Trm112p-like protein	Chr1	7864734	7866378	278.8	2788
AT1G22275	(ZYP1b)	Chr1	7867050	7867630	79.2	792
AT1G22280	PHYTOCHROME-ASSOCIATED PROTEIN PHOSPHATASE TYPE 2C (PAPP2C)	Chr1	7873937	7875555	308	3080
AT1G22300	GENERAL REGULATORY FACTOR 10 (GRF10)	Chr1	7880163	7881326	241	2410
AT1G22310	METHYL-CPG-BINDING DOMAIN 8 (MBD8)	Chr1	7882654	7883864	254	2540
AT1G22360	UDP-GLUCOSYL TRANSFERASE 85A2 (UGT85A2)	Chr1	7895194	7896007	59.2	592
AT1G22370	UDP-GLUCOSYL TRANSFERASE 85A5 (UGT85A5)	Chr1	7898125	7898962	132.8	1328
AT1G22400	(UGT85A1)	Chr1	7905617	7906737	173.1	1731
AT1G22403		Chr1	7908847	7909696	140.7	1407
AT1G22410	Class-II DAHP synthetase family protein	Chr1	7911859	7913861	215.5	2155
AT1G22440	Zinc-binding alcohol dehydrogenase family protein	Chr1	7922385	7923642	180.9	1809
AT1G22450	CYTOCHROME C OXIDASE 6B (COX6B)	Chr1	7925169	7926332	267	2670
AT1G22470	hypothetical protein	Chr1	7932841	7933461	68.2	682
AT1G22490	basic helix-loop-helix (bHLH) DNA-binding superfamily protein	Chr1	7939949	7940578	69.2	692
AT1G22510	E3 ubiquitin-protein ligase RNF170-like protein (DUF 1232)	Chr1	7951894	7952771	194.5	1945
AT1G22520	MICOS complex subunit Mic10-like protein (DUF543)	Chr1	7953721	7954495	129.1	1291
AT1G22530	PATELLIN 2 (PATL2)	Chr1	7956654	7958546	194.3	1943
AT1G22540	NPF5.10	Chr1	7963905	7965165	336.2	3362
AT1G22570	Major facilitator superfamily protein	Chr1	7977695	7978704	94.4	944
AT1G22610	C2 calcium/lipid-binding plant phosphoribosyltransferase family protein	Chr1	7994249	7996840	216.8	2168
AT1G22620	SUPPRESSOR OF ACTIN 1 (ATSAC1)	Chr1	8002122	8003002	220.7	2207
AT1G22640	MYB DOMAIN PROTEIN 3 (MYB3)	Chr1	8006084	8007366	267.1	2671
AT1G22650	ALKALINE/NEUTRAL INVERTASE D (A/N-InvD)	Chr1	8014292	8015974	120	1200
AT1G22660	Polynucleotide adenylyltransferase family protein	Chr1	8017189	8018330	316.8	3168
AT1G22700	Tetratricopeptide repeat (TPR)-like superfamily protein	Chr1	8029075	8030127	304.9	3049
AT1G22730	MA3 domain-containing protein	Chr1	8046008	8047204	254.9	2549
AT1G22750	transmembrane protein	Chr1	8050720	8051465	86.8	868
AT1G22770	GIGANTEA (GI)	Chr1	8061716	8062876	300.9	3009
AT1G22780	POINTED FIRST LEAVES (PFL)	Chr1	8067787	8068852	184.1	1841
AT1G22790	Low affinity potassium transport system protein	Chr1	8069385	8070457	143.6	1436
AT1G22800	S-adenosyl-L-methionine-dependent methyltransferases superfamily protein	Chr1	8071759	8072723	120.5	1205
AT1G22830	Tetratricopeptide repeat (TPR)-like superfamily protein	Chr1	8076547	8077554	158.5	1585
AT1G22840	CYTOCHROME C-1 (CYTC-1)	Chr1	8079213	8080120	109.1	1091
AT1G22850	SNARE associated Golgi protein family	Chr1	8082087	8084256	191.7	1917
AT1G22860	Vacuolar sorting protein 39	Chr1	8082087	8084256	188.6	1886
AT1G22870	kinase family with ARM repeat domain-containing protein	Chr1	8089153	8090493	359.3	3593
AT1G22880	CELLULASE 5 (CEL5)	Chr1	8096797	8097725	237.7	2377
AT1G22882	ATSUN3; SUN-DOMAIN PROTEIN 3; SUN3	Chr1	8098485	8099934	233.9	2339
AT1G22910	RNA-binding (RRM/RBD/RNP motifs) family protein	Chr1	8105549	8106517	276.6	2766
AT1G22920	COP9 SIGNALOSOME 5A (CSN5A)	Chr1	8110813	8112188	359.3	3593
AT1G22930	T-complex protein 11	Chr1	8117275	8119092	238.3	2383
AT1G22940	THIAMINE REQUIRING 1 (TH1)	Chr1	8122260	8123082	156	1560
AT1G22950	2-oxoglutarate (2OG) and Fe(II)-dependent oxygenase superfamily protein	Chr1	8126387	8127289	156.8	1568
AT1G22960	Pentatricopeptide repeat (PPR) superfamily protein	Chr1	8129429	8130489	165.4	1654
AT1G22970	cyclin-D1-binding protein	Chr1	8131557	8132335	103.7	1037
AT1G22985	CYTOKININ RESPONSE FACTOR 7 (CRF7)	Chr1	8134989	8136021	217	2170
AT1G23000	Heavy metal transport/detoxification superfamily protein	Chr1	8143665	8144749	91.1	911
AT1G23010	LOW PHOSPHATE ROOT1 (LPR1)	Chr1	8147152	8148596	73.7	737
AT1G23020	FERRIC REDUCTION OXIDASE 3 (FRO3)	Chr1	8152846	8153510	60.1	601
AT1G23030	PLANT U-BOX PROTEIN 11; PUB11	Chr1	8156468	8157857	345.8	3458
AT1G23040	hydroxyproline-rich glycoprotein family protein	Chr1	8164855	8165794	279.7	2797
AT1G23050	hydroxyproline-rich glycoprotein family protein	Chr1	8168585	8169205	101.7	1017
AT1G23052		Chr1	8168585	8169205	101.7	1017
AT1G23080	PIN-FORMED 7 (PIN7)	Chr1	8181017	8183661	220.2	2202
AT1G23100	GroES-like family protein	Chr1	8195663	8196475	231.2	2312
AT1G23120	Polyketide cyclase/dehydrase and lipid transport superfamily protein	Chr1	8198677	8199463	77.8	778
AT1G23140	C2-DOMAIN ABA-RELATED8; CAR8	Chr1	8202467	8203401	209.4	2094
AT1G23150	hypothetical protein	Chr1	8206446	8207599	214.9	2149
AT1G23170	transmembrane protein (Protein of unknown function DUF2359%2C transmembrane)	Chr1	8212554	8213617	259.6	2596
AT1G23180	ARM repeat superfamily protein	Chr1	8215832	8216816	185.1	1851
AT1G23190	PHOSPHOGLUCOMUTASE 3 (PGM3)	Chr1	8219719	8220636	235.2	2352
AT1G23220	Dynein light chain type 1 family protein	Chr1	8242349	8243317	251.9	2519
AT1G23230	mediator of RNA polymerase II transcription subunit	Chr1	8244188	8245488	259.3	2593
AT1G23260	MMS ZWEI HOMOLOGUE 1 (MMZ1)	Chr1	8257871	8258789	235.5	2355
AT1G23280	MAK16 protein-like protein	Chr1	8262045	8264053	197.9	1979
AT1G23290	(RPL27AB)	Chr1	8262045	8264053	234.7	2347
AT1G23310	GLUTAMATE:GLYOXYLATE AMINOTRANSFERASE (GGT1)	Chr1	8270887	8272057	279.7	2797
AT1G23330	alpha/beta-Hydrolases superfamily protein	Chr1	8281291	8282381	260.4	2604
AT1G23360	(MENG)	Chr1	8296001	8297071	300.1	3001
AT1G23380	KNOTTED1-LIKE HOMEOBOX GENE 6 (KNAT6)	Chr1	8301209	8302786	342.6	3426
AT1G23390	Kelch repeat-containing F-box family protein	Chr1	8309466	8310750	220.5	2205
AT1G23400	(CAF2)	Chr1	8313874	8315833	179.1	1791
AT1G23410	Ribosomal protein S27a / Ubiquitin family protein	Chr1	8313874	8315833	197.3	1973
AT1G23440	Peptidase C15%2C pyroglutamyl peptidase I-like protein	Chr1	8321567	8323751	323.3	3233
AT1G23465	Peptidase S24/S26A/S26B/S26C family protein	Chr1	8329802	8330752	303.3	3033
AT1G23490	ADP-RIBOSYLATION FACTOR 1 (ARF1)	Chr1	8336524	8337740	320.9	3209
AT1G23550	SIMILAR TO RCD ONE 2 (SRO2)	Chr1	8350700	8352008	213	2130
AT1G23710	hypothetical protein (DUF1645)	Chr1	8385097	8386442	344.3	3443
AT1G23740	ALKENAL/ONE OXIDOREDUCTASE (AOR)	Chr1	8398966	8399746	86.3	863
AT1G23750	Nucleic acid-binding%2C OB-fold-like protein	Chr1	8400118	8400685	55.4	554
AT1G23760	(JP630)	Chr1	8402184	8403226	157	1570
AT1G23780	F-box family protein	Chr1	8407549	8408671	299.1	2991
AT1G23790	dicer-like protein (DUF936)	Chr1	8410054	8410796	41	410
AT1G23820	SPERMIDINE SYNTHASE 1 (SPDS1)	Chr1	8420210	8421144	183.8	1838
AT1G23830	transmembrane protein	Chr1	8423116	8424074	102.7	1027
AT1G23850	transmembrane protein	Chr1	8426134	8427127	136.7	1367
AT1G23860	RS-CONTAINING ZINC FINGER PROTEIN 21 (RSZ21)	Chr1	8428496	8429373	120.8	1208
AT1G23870	TREHALOSE-PHOSPHATASE/SYNTHASE 9 (TPS9)	Chr1	8432143	8433520	148.3	1483
AT1G23880	NHL domain-containing protein	Chr1	8436115	8437003	139.3	1393
AT1G23890	NHL domain-containing protein	Chr1	8440041	8441955	178	1780
AT1G23900	GAMMA-ADAPTIN 1 (GAMMA-ADAPTIN 1)	Chr1	8440041	8441955	256.6	2566
AT1G23950	hypothetical protein (DUF626)	Chr1	8470684	8471537	173.3	1733
AT1G23960	hypothetical protein (DUF626)	Chr1	8479458	8480950	272.4	2724
AT1G23970	hypothetical protein (DUF626)	Chr1	8483272	8483919	126	1260
AT1G23980	RING/U-box superfamily protein	Chr1	8485012	8486195	286.6	2866
AT1G24040	Acyl-CoA N-acyltransferases (NAT) superfamily protein	Chr1	8505741	8507909	276.5	2765
AT1G24050	RNA-processing%2C Lsm domain-containing protein	Chr1	8505741	8507909	268	2680
AT1G24095	Putative thiol-disulfide oxidoreductase DCC	Chr1	8523185	8523995	182.9	1829
AT1G24100	UDP-GLUCOSYL TRANSFERASE 74B1 (UGT74B1)	Chr1	8525710	8527193	252	2520
AT1G24120	ARG1-LIKE 1 (ARL1)	Chr1	8531399	8532369	232.4	2324
AT1G24130	Transducin/WD40 repeat-like superfamily protein	Chr1	8534410	8535467	105.5	1055
AT1G24140	Matrixin family protein	Chr1	8536192	8537378	135.3	1353
AT1G24150	FORMIN HOMOLOGUE 4 (FH4)	Chr1	8549255	8551113	303.2	3032
AT1G24160	triadin	Chr1	8555479	8556436	116.7	1167
AT1G24170	(LGT9)	Chr1	8557252	8558852	167	1670
AT1G24180	IAA-CONJUGATE-RESISTANT 4 (IAR4)	Chr1	8562304	8563625	269	2690
AT1G24190	SIN3-LIKE 3 (SNL3)	Chr1	8569622	8570693	304.9	3049
AT1G24210	Paired amphipathic helix (PAH2) superfamily protein	Chr1	8574614	8575259	116.8	1168
AT1G24240	Ribosomal protein L19 family protein	Chr1	8586205	8587076	300.1	3001
AT1G24265	bZIP transcription factor%2C putative (DUF1664)	Chr1	8600279	8601165	285.9	2859
AT1G24267	bZIP transcription factor%2C putative (DUF1664)	Chr1	8606453	8607588	273.3	2733
AT1G24280	GLUCOSE-6-PHOSPHATE DEHYDROGENASE 3 (G6PD3)	Chr1	8609282	8610267	164.9	1649
AT1G24290	AAA-type ATPase family protein	Chr1	8613481	8614474	245.1	2451
AT1G24300	GYF domain-containing protein	Chr1	8619721	8620770	257.7	2577
AT1G24310	NUP54	Chr1	8623910	8625083	297.2	2972
AT1G24330	ARM repeat superfamily protein	Chr1	8631248	8632183	140	1400
AT1G24340	EMBRYO DEFECTIVE 2421 (emb2421)	Chr1	8634987	8635972	242.3	2423
AT1G24350	Acid phosphatase/vanadium-dependent haloperoxidase-related protein	Chr1	8639703	8641854	184.7	1847
AT1G24360	NAD(P)-binding Rossmann-fold superfamily protein	Chr1	8639703	8641854	288.4	2884
AT1G24440	RING/U-box superfamily protein	Chr1	8662002	8663116	178.5	1785
AT1G24450	NUCLEAR FUSION DEFECTIVE 2 (NFD2)	Chr1	8664033	8664955	167.7	1677
AT1G24460	TGN-LOCALIZED SYP41 INTERACTING PROTEIN (TNO1)	Chr1	8665721	8666852	148.1	1481
AT1G24490	ALBINA 4 (ALB4)	Chr1	8682064	8683201	347.5	3475
AT1G24510	TCP-1/cpn60 chaperonin family protein	Chr1	8687076	8688417	348.3	3483
AT1G24530	Transducin/WD40 repeat-like superfamily protein	Chr1	8693035	8694371	345.1	3451
AT1G24560	paramyosin	Chr1	8702172	8703590	360.1	3601
AT1G24610	Rubisco methyltransferase family protein	Chr1	8721928	8722879	255.4	2554
AT1G24625	ZINC FINGER PROTEIN 7 (ZFP7)	Chr1	8725902	8727219	250.3	2503
AT1G24650	Leucine-rich repeat protein kinase family protein	Chr1	8734423	8735276	110.3	1103
AT1G24706	(THO2)	Chr1	8741773	8742983	361.5	3615
AT1G24764	MICROTUBULE-ASSOCIATED PROTEINS 70-2 (MAP70-2)	Chr1	8762055	8763514	309.9	3099
AT1G24793	LIPID X C1 (LPXC1)	Chr1	8767478	8768431	186.4	1864
AT1G24800	F-box family protein	Chr1	8769512	8771000	247.4	2474
AT1G24822	hypothetical protein	Chr1	8775800	8777240	330.5	3305
AT1G24880	LIPID X C2 (LPXC2)	Chr1	8775800	8777240	330.5	3305
AT1G24881	F-box family protein	Chr1	8783912	8785383	251.6	2516
AT1G25054	LIPID X C3 (LPXC3)	Chr1	8798306	8799786	339.4	3394
AT1G25055	F-box family protein	Chr1	8806434	8807893	241	2410
AT1G25097	hypothetical protein	Chr1	8812695	8814160	343.5	3435
AT1G25098		Chr1	8812695	8814160	343.5	3435
AT1G25145	LIPID X C4 (LPXC4)	Chr1	8818731	8819735	232.9	2329
AT1G25150	F-box family protein	Chr1	8820816	8822287	246.2	2462
AT1G25175		Chr1	8827071	8828532	339.4	3394
AT1G25210	LIPID X C5 (LPXC5)	Chr1	8833106	8834073	213.8	2138
AT1G25211	F-box family protein	Chr1	8835236	8836553	162.6	1626
AT1G25220	ANTHRANILATE SYNTHASE BETA SUBUNIT 1 (ASB1)	Chr1	8838556	8839648	189.4	1894
AT1G25260	Ribosomal protein L10 family protein	Chr1	8854972	8855999	310.4	3104
AT1G25275	thionin-like protein	Chr1	8860600	8862439	140.9	1409
AT1G25280	TUBBY LIKE PROTEIN 10 (TLP10)	Chr1	8864041	8865637	109.4	1094
AT1G25290	RHOMBOID-LIKE PROTEIN 10 (RBL10)	Chr1	8867038	8867909	130.6	1306
AT1G25320	Leucine-rich repeat protein kinase family protein	Chr1	8877720	8879954	303.9	3039
AT1G25350	OVULE ABORTION 9 (OVA9)	Chr1	8893376	8895102	198.3	1983
AT1G25360	Pentatricopeptide repeat (PPR) superfamily protein	Chr1	8893376	8895102	119.4	1194
AT1G25370	hypothetical protein (DUF1639)	Chr1	8897992	8899168	150.2	1502
AT1G25375	Metallo-hydrolase/oxidoreductase superfamily protein	Chr1	8902460	8904264	153.1	1531
AT1G25380	NAD+ TRANSPORTER 2 (NDT2)	Chr1	8902460	8904264	165.2	1652
AT1G25390	LEAF RUST 10 DISEASE-RESISTANCE LOCUS RECEPTOR- LIKE PROTEIN KINASE-LIKE 4; LRK10L4	Chr1	8907794	8909143	177.8	1778
AT1G25400	transmembrane protein	Chr1	8911451	8912398	123.3	1233
AT1G25420	IST1-LIKE 2; ISTL2	Chr1	8915891	8916963	291.2	2912
AT1G25440	B-box type zinc finger protein with CCT domain-containing protein	Chr1	8934703	8935481	133.2	1332
AT1G25450	3-KETOACYL-COA SYNTHASE 5 (KCS5)	Chr1	8938774	8940225	112.7	1127
AT1G25470	CYTOKININ RESPONSE FACTOR 12 (CRF12)	Chr1	8945484	8946705	245.6	2456
AT1G25480	aluminum activated malate transporter family protein	Chr1	8948289	8949242	178.3	1783
AT1G25490	ROOTS CURL IN NPA (RCN1)	Chr1	8951084	8952124	264	2640
AT1G25500	Plasma-membrane choline transporter family protein	Chr1	8957098	8958071	159.1	1591
AT1G25510	Eukaryotic aspartyl protease family protein	Chr1	8959336	8960894	162.6	1626
AT1G25520	Uncharacterized protein family (UPF0016)	Chr1	8962076	8962841	122	1220
AT1G25530	Transmembrane amino acid transporter family protein	Chr1	8966200	8967482	177.1	1771
AT1G25540	PHYTOCHROME AND FLOWERING TIME 1 (PFT1)	Chr1	8973869	8974800	213.9	2139
AT1G25550	myb-like transcription factor family protein	Chr1	8976459	8978057	209.2	2092
AT1G25560	TEMPRANILLO 1 (TEM1)	Chr1	8981899	8983160	345.9	3459
AT1G25570	Di-glucose binding protein with Leucine-rich repeat domain-containing protein	Chr1	8993907	8995664	255.9	2559
AT1G25580	SUPPRESSOR OF GAMMA RADIATION 1 (SOG1)	Chr1	8999011	8999838	187.8	1878
AT1G25682	CWC16A	Chr1	9003806	9004784	262.7	2627
AT1G26090	P-loop containing nucleoside triphosphate hydrolases superfamily protein	Chr1	9020249	9021347	289.6	2896
AT1G26100	Cytochrome b561/ferric reductase transmembrane protein family	Chr1	9023298	9024161	125.5	1255
AT1G26110	DECAPPING 5 (DCP5)	Chr1	9026719	9027861	177.5	1775
AT1G26120	ISOPRENYLCYSTEINE METHYLESTERASE-LIKE 1 (ICME-LIKE1)	Chr1	9030561	9031644	176.9	1769
AT1G26130	ATPase E1-E2 type family protein / haloacid dehalogenase-like hydrolase family protein	Chr1	9032950	9034039	191.8	1918
AT1G26150	PROLINE-RICH EXTENSIN-LIKE RECEPTOR KINASE 10 (PERK10)	Chr1	9042337	9043583	155.8	1558
AT1G26160	Metal-dependent phosphohydrolase	Chr1	9046154	9047191	319.8	3198
AT1G26170	ARM repeat superfamily protein	Chr1	9053761	9055556	269.8	2698
AT1G26180	membrane protein	Chr1	9053761	9055556	265.1	2651
AT1G26190	Phosphoribulokinase / Uridine kinase family	Chr1	9059555	9061214	307.6	3076
AT1G26218	SHORT OPEN READING FRAME 14; SORF14	Chr1	9070890	9072422	251.4	2514
AT1G26220	Acyl-CoA N-acyltransferases (NAT) superfamily protein	Chr1	9070890	9072422	251.4	2514
AT1G26230	CHAPERONIN-60BETA4 (CPN60BETA4)	Chr1	9075905	9076917	266.6	2666
AT1G26235		Chr1	9075905	9076917	266.6	2666
AT1G26260	CRYPTOCHROME-INTERACTING BASIC-HELIX-LOOP-HELIX 5 (CIB5)	Chr1	9086663	9087848	118.7	1187
AT1G26270	Phosphatidylinositol 3- and 4-kinase family protein	Chr1	9090576	9092583	175.9	1759
AT1G26300	BSD domain-containing protein	Chr1	9098609	9099992	336.2	3362
AT1G26330	DNA binding protein	Chr1	9107470	9108123	80.4	804
AT1G26340	CYTOCHROME B5 ISOFORM A (CB5-A)	Chr1	9113755	9114756	291.4	2914
AT1G26370	RNA helicase family protein	Chr1	9124685	9125717	316.8	3168
AT1G26440	UREIDE PERMEASE 5 (UPS5)	Chr1	9145258	9146196	281.2	2812
AT1G26460	Tetratricopeptide repeat (TPR)-like superfamily protein	Chr1	9151578	9152848	251.1	2511
AT1G26470	SNRK2-SUBSTRATE 1; SNS1	Chr1	9154975	9155933	181.6	1816
AT1G26500	Pentatricopeptide repeat (PPR) superfamily protein	Chr1	9158283	9159183	196.2	1962
AT1G26515	F-box and associated interaction domains-containing protein	Chr1	9162050	9162927	95.2	952
AT1G26520	Cobalamin biosynthesis CobW-like protein	Chr1	9164780	9166338	219.4	2194
AT1G26530	PIN domain-like family protein	Chr1	9164780	9166338	219.4	2194
AT1G26540	Agenet domain-containing protein	Chr1	9170198	9171928	125.4	1254
AT1G26550	FKBP-like peptidyl-prolyl cis-trans isomerase family protein	Chr1	9170198	9171928	286.7	2867
AT1G26580	ELM2 domain protein	Chr1	9184588	9186148	295.5	2955
AT1G26620	T-box transcription factor%2C putative (DUF863)	Chr1	9198657	9199805	203	2030
AT1G26630	FUMONISIN B1-RESISTANT12 (FBR12)	Chr1	9205735	9206992	213.3	2133
AT1G26640	IPK; ISOPENTENYL PHOSPHATE KINASE	Chr1	9209246	9210871	90.7	907
AT1G26650	Son of sevenless protein	Chr1	9209246	9210871	105.6	1056
AT1G26660	Prefoldin chaperone subunit family protein	Chr1	9211666	9212362	93.4	934
AT1G26665	Mediator complex%2C subunit Med10	Chr1	9214092	9214912	77.1	771
AT1G26670	(VTI1B)	Chr1	9215831	9216746	225.6	2256
AT1G26690	emp24/gp25L/p24 family/GOLD family protein	Chr1	9224861	9225912	308.8	3088
AT1G26730	EXS (ERD1/XPR1/SYG1) family protein	Chr1	9241224	9243576	162.3	1623
AT1G26740	Ribosomal L32p protein family	Chr1	9245964	9247448	114.9	1149
AT1G26750	hypothetical protein	Chr1	9245964	9247448	138.3	1383
AT1G26760	SET DOMAIN PROTEIN 35 (SDG35)	Chr1	9249174	9249994	52.7	527
AT1G26770	EXPANSIN A10 (EXPA10)	Chr1	9259569	9261164	273.5	2735
AT1G26800	RING/U-box superfamily protein	Chr1	9285055	9286379	310.4	3104
AT1G26810	GALACTOSYLTRANSFERASE1 (GALT1)	Chr1	9289309	9290123	202.3	2023
AT1G26830	CULLIN 3 (CUL3)	Chr1	9295550	9296666	340.1	3401
AT1G26840	ORIGIN RECOGNITION COMPLEX PROTEIN 6 (ORC6)	Chr1	9298691	9299452	61.1	611
AT1G26850	S-adenosyl-L-methionine-dependent methyltransferases superfamily protein	Chr1	9302789	9304299	284.7	2847
AT1G26880	Ribosomal protein L34e superfamily protein	Chr1	9315818	9316878	297.6	2976
AT1G26900	Pentatricopeptide repeat (PPR) superfamily protein	Chr1	9320604	9322352	250.5	2505
AT1G26910	RIBOSOMAL PROTEIN L10 B (RPL10B)	Chr1	9320604	9322352	217.2	2172
AT1G26920	zinc finger CCHC domain protein	Chr1	9329458	9330500	328.1	3281
AT1G26930	Galactose oxidase/kelch repeat superfamily protein	Chr1	9336227	9337870	347.8	3478
AT1G26940	Cyclophilin-like peptidyl-prolyl cis-trans isomerase family protein	Chr1	9342938	9343961	307.2	3072
AT1G27000	GRIP/coiled-coil protein%2C putative (DUF1664)	Chr1	9373793	9374953	325.7	3257
AT1G27050	homeobox leucine zipper protein	Chr1	9393534	9395612	247.5	2475
AT1G27060	Regulator of chromosome condensation (RCC1) family protein	Chr1	9393534	9395612	146.2	1462
AT1G27070	5'-AMP-activated protein kinase-like protein	Chr1	9398451	9399586	228.2	2282
AT1G27090	glycine-rich protein	Chr1	9404912	9406385	197.6	1976
AT1G27100	Actin cross-linking protein	Chr1	9407717	9408723	159.1	1591
AT1G27110	Tetratricopeptide repeat (TPR)-like superfamily protein	Chr1	9415337	9416039	117.4	1174
AT1G27120	Galactosyltransferase family protein	Chr1	9421067	9422322	250.8	2508
AT1G27130	GLUTATHIONE S-TRANSFERASE TAU 13 (GSTU13)	Chr1	9425494	9426648	157	1570
AT1G27150	Tetratricopeptide repeat (TPR)-like superfamily protein	Chr1	9428919	9429739	218.5	2185
AT1G27170	transmembrane receptors / ATP binding protein	Chr1	9434309	9435375	291.4	2914
AT1G27180	disease resistance protein (TIR-NBS-LRR class)	Chr1	9441047	9442073	298.5	2985
AT1G27190	Leucine-rich repeat protein kinase family protein	Chr1	9447687	9448931	219.8	2198
AT1G27200	glycosyltransferase family protein (DUF23)	Chr1	9450215	9451737	196.7	1967
AT1G27210	ARM repeat superfamily protein	Chr1	9456380	9458146	353.8	3538
AT1G27290	transmembrane protein	Chr1	9481643	9482595	93.8	938
AT1G27300	transmembrane protein	Chr1	9483279	9483984	47.6	476
AT1G27310	NUCLEAR TRANSPORT FACTOR 2A (NTF2A)	Chr1	9485082	9485919	98	980
AT1G27330	Ribosome associated membrane protein RAMP4	Chr1	9492903	9494044	175.2	1752
AT1G27340	LEAF CURLING RESPONSIVENESS (LCR)	Chr1	9495456	9496513	182	1820
AT1G27350	Ribosome associated membrane protein RAMP4	Chr1	9498547	9499544	180	1800
AT1G27360	SQUAMOSA PROMOTER-LIKE 11 (SPL11)	Chr1	9500839	9501669	213.1	2131
AT1G27370	SQUAMOSA PROMOTER BINDING PROTEIN-LIKE 10 (SPL10)	Chr1	9507488	9508482	268.1	2681
AT1G27385	phosphoribosylformylglycinamidine synthase	Chr1	9512160	9512950	132.7	1327
AT1G27390	TRANSLOCASE OUTER MEMBRANE 20-2 (TOM20-2)	Chr1	9514181	9516112	100.8	1008
AT1G27400	Ribosomal protein L22p/L17e family protein	Chr1	9514181	9516112	130.5	1305
AT1G27410	DNA repair metallo-beta-lactamase family protein	Chr1	9517087	9517881	127	1270
AT1G27430	GYF domain-containing protein	Chr1	9526279	9527303	222.3	2223
AT1G27435	hypothetical protein	Chr1	9528248	9528962	132.7	1327
AT1G27440	(GUT2)	Chr1	9530672	9531427	96.1	961
AT1G27450	ADENINE PHOSPHORIBOSYL TRANSFERASE 1 (APT1)	Chr1	9531996	9533054	150.8	1508
AT1G27460	NO POLLEN GERMINATION RELATED 1 (NPGR1)	Chr1	9534462	9535295	160.7	1607
AT1G27470	transducin family protein / WD-40 repeat family protein	Chr1	9543118	9544484	353.1	3531
AT1G27500	Tetratricopeptide repeat (TPR)-like superfamily protein	Chr1	9552737	9554331	155.2	1552
AT1G27510	EXECUTER 2 (EX2)	Chr1	9557524	9559462	204	2040
AT1G27520	MANNOSIDASE 5; MNS5	Chr1	9557524	9559462	173.9	1739
AT1G27530	ubiquitin-fold modifier-conjugating enzyme	Chr1	9563176	9564167	224.2	2242
AT1G27540	F-box protein (DUF295)	Chr1	9566995	9568044	269.3	2693
AT1G27565	hypothetical protein	Chr1	9574627	9575107	50	500
AT1G27580	F-box protein (DUF295)	Chr1	9590290	9591166	208.7	2087
AT1G27590		Chr1	9591918	9593068	340.1	3401
AT1G27600	IRREGULAR XYLEM 9-LIKE (IRX9-L)	Chr1	9604818	9606264	271.7	2717
AT1G27630	CYCLIN T 1;3 (CYCT1;3)	Chr1	9611047	9612121	181.7	1817
AT1G27650	(ATU2AF35A)	Chr1	9614423	9615716	257.8	2578
AT1G27680	ADPGLC-PPASE LARGE SUBUNIT (APL2)	Chr1	9631156	9632254	253.6	2536
AT1G27690	lipase%2C putative (DUF620)	Chr1	9636491	9637728	205.1	2051
AT1G27695	TGD5; TRIGALACTOSYLDIACYLGLYCEROL 5	Chr1	9638927	9639672	146.7	1467
AT1G27700	Syntaxin/t-SNARE family protein	Chr1	9641029	9641998	188.9	1889
AT1G27720	TBP-ASSOCIATED FACTOR 4B (TAF4b)	Chr1	9646586	9647558	106.7	1067
AT1G27730	SALT TOLERANCE ZINC FINGER (STZ)	Chr1	9648058	9649219	330.5	3305
AT1G27750	nucleic acid binding protein	Chr1	9657155	9658185	351.7	3517
AT1G27752	Ubiquitin system component Cue protein	Chr1	9661936	9663165	315.6	3156
AT1G27760	SALT-TOLERANCE 32 (SAT32)	Chr1	9668431	9670274	325.4	3254
AT1G27770	AUTOINHIBITED CA2+-ATPASE 1 (ACA1)	Chr1	9674902	9676388	338.6	3386
AT1G27840	(ATCSA-1)	Chr1	9695478	9696502	242.9	2429
AT1G27850	RUN/FYVE domain protein	Chr1	9698272	9699403	298.6	2986
AT1G27860	hypothetical protein (DUF626)	Chr1	9705585	9706415	133.8	1338
AT1G27880	DEAD/DEAH box RNA helicase family protein	Chr1	9708730	9709979	339.7	3397
AT1G27890	Polynucleotidyl transferase%2C ribonuclease H-like superfamily protein	Chr1	9714285	9715220	196.7	1967
AT1G27900	RNA helicase family protein	Chr1	9719693	9720740	308.8	3088
AT1G27910	PLANT U-BOX 45 (PUB45)	Chr1	9723854	9724817	189.7	1897
AT1G27921		Chr1	9729577	9730447	97.4	974
AT1G27930	glucuronoxylan 4-O-methyltransferase-like protein (DUF579)	Chr1	9731251	9732638	300.7	3007
AT1G27950	GLYCOSYLPHOSPHATIDYLINOSITOL-ANCHORED LIPID PROTEIN TRANSFER 1 (LTPG1)	Chr1	9740598	9742059	158.2	1582
AT1G27960	EVOLUTIONARILY CONSERVED C-TERMINAL REGION 9 (ECT9)	Chr1	9745076	9745848	120.2	1202
AT1G27970	NUCLEAR TRANSPORT FACTOR 2B (NTF2B)	Chr1	9746715	9747854	200.9	2009
AT1G27980	DIHYDROSPHINGOSINE PHOSPHATE LYASE (DPL1)	Chr1	9748573	9749566	180	1800
AT1G28050	B-BOX DOMAIN PROTEIN 13; BBX13	Chr1	9776659	9777943	191.7	1917
AT1G28060	Pre-mRNA-splicing factor 3	Chr1	9779034	9780567	155.2	1552
AT1G28070	ATP-dependent RNA helicase	Chr1	9782987	9783802	102.6	1026
AT1G28090	Polynucleotide adenylyltransferase family protein	Chr1	9795581	9796745	340.3	3403
AT1G28110	SERINE CARBOXYPEPTIDASE-LIKE 45 (SCPL45)	Chr1	9804680	9807020	88.3	883
AT1G28120	ubiquitin thioesterase otubain-like protein	Chr1	9814702	9815696	300.9	3009
AT1G28130	(GH3.17)	Chr1	9825238	9827795	166	1660
AT1G28140	integral membrane family protein	Chr1	9833420	9834599	314.5	3145
AT1G28150	hypothetical protein	Chr1	9835164	9836131	225.5	2255
AT1G28190	hypothetical protein	Chr1	9846767	9848025	244.8	2448
AT1G28200	FH INTERACTING PROTEIN 1 (FIP1)	Chr1	9851370	9852518	236.1	2361
AT1G28210	(ATJ1)	Chr1	9854420	9855181	174.9	1749
AT1G28240	strawberry notch protein (DUF616)	Chr1	9871150	9872316	299	2990
AT1G28250	transmembrane protein	Chr1	9874170	9874889	129.2	1292
AT1G28260	Telomerase activating protein Est1	Chr1	9877398	9879405	190	1900
AT1G28280	VQ motif-containing protein	Chr1	9886206	9887531	189.3	1893
AT1G28290	ARABINOGALACTAN PROTEIN 31 (AGP31)	Chr1	9889157	9890923	92.8	928
AT1G28310	Dof-type zinc finger DNA-binding family protein	Chr1	9911793	9913783	268.1	2681
AT1G28320	(DEG15)	Chr1	9923402	9924634	320.9	3209
AT1G28330	DORMANCY-ASSOCIATED PROTEIN-LIKE 1 (DYL1)	Chr1	9933918	9935449	342.7	3427
AT1G28340	RECEPTOR LIKE PROTEIN 4 (RLP4)	Chr1	9939946	9941184	315.9	3159
AT1G28350	Nucleotidylyl transferase superfamily protein	Chr1	9943856	9944731	196.3	1963
AT1G28360	ERF DOMAIN PROTEIN 12 (ERF12)	Chr1	9951705	9952799	315.5	3155
AT1G28370	ERF DOMAIN PROTEIN 11 (ERF11)	Chr1	9956073	9957069	292.4	2924
AT1G28380	NECROTIC SPOTTED LESIONS 1 (NSL1)	Chr1	9963485	9964552	221.2	2212
AT1G28390	Protein kinase superfamily protein	Chr1	9966924	9968332	148.6	1486
AT1G28395	hypothetical protein	Chr1	9970807	9971581	140	1400
AT1G28400	GATA zinc finger protein	Chr1	9972622	9973886	233.6	2336
AT1G28410	myosin heavy chain-like protein	Chr1	9978472	9980860	235.2	2352
AT1G28420	HOMEOBOX-1 (HB-1)	Chr1	9978472	9980860	250.9	2509
AT1G28440	HAESA-LIKE 1 (HSL1)	Chr1	9996703	9998900	273.7	2737
AT1G28480	(GRX480)	Chr1	10012997	10014239	226.8	2268
AT1G28490	SYNTAXIN OF PLANTS 61 (SYP61)	Chr1	10015784	10016655	257.1	2571
AT1G28500	hypothetical protein (DUF626)	Chr1	10018614	10019245	78.4	784
AT1G28510	Optic atrophy 3 protein (OPA3)	Chr1	10023684	10024668	345.9	3459
AT1G28520	VASCULAR PLANT ONE ZINC FINGER PROTEIN (VOZ1)	Chr1	10029042	10030430	327.3	3273
AT1G28530	ANGULATA 10; ANU10	Chr1	10034733	10036484	290.5	2905
AT1G28540	transmembrane protein	Chr1	10034733	10036484	284	2840
AT1G28560	SHOOT REDIFFERENTIATION DEFECTIVE 2 (SRD2)	Chr1	10040722	10041617	256.2	2562
AT1G28580	GDSL-like Lipase/Acylhydrolase superfamily protein	Chr1	10045213	10046584	281.9	2819
AT1G28600	GDSL-like Lipase/Acylhydrolase superfamily protein	Chr1	10052117	10053170	121.6	1216
AT1G28680	HXXXD-type acyl-transferase family protein	Chr1	10078144	10079697	251.6	2516
AT1G28685		Chr1	10078144	10079697	251.6	2516
AT1G28690	Tetratricopeptide repeat (TPR)-like superfamily protein	Chr1	10080896	10081805	205.7	2057
AT1G28760	INNER NUCLEAR MEMBRANE PROTEIN A; NEMP_A	Chr1	10102090	10104351	279.6	2796
AT1G28960	NUDIX HYDROLASE HOMOLOG 15 (NUDX15)	Chr1	10110667	10111803	349.1	3491
AT1G29030	Apoptosis inhibitory protein 5 (API5)	Chr1	10133217	10135003	203.5	2035
AT1G29040	50S ribosomal protein L34	Chr1	10133217	10135003	231	2310
AT1G29041	hypothetical protein	Chr1	10135250	10136075	168.7	1687
AT1G29060	Target SNARE coiled-coil domain protein	Chr1	10147523	10148623	309.1	3091
AT1G29070	Ribosomal protein L34	Chr1	10149640	10150576	315.4	3154
AT1G29120	UP9	Chr1	10174128	10175222	330.5	3305
AT1G29150	NON-ATPASE SUBUNIT 9 (ATS9)	Chr1	10180385	10181427	231.4	2314
AT1G29160	Dof-type zinc finger DNA-binding family protein	Chr1	10183397	10184499	311.3	3113
AT1G29170	(WAVE2)	Chr1	10194154	10195311	280.5	2805
AT1G29179	cysteine/histidine-rich C1 domain protein	Chr1	10198835	10199794	94.4	944
AT1G29195	phosphatidylinositol 4-phosphate 5-kinase MSS4-like protein	Chr1	10202389	10203490	310.5	3105
AT1G29220	transcriptional regulator family protein	Chr1	10211686	10212861	349.1	3491
AT1G29240	transcription initiation factor TFIID subunit%2C putative (DUF688)	Chr1	10219089	10219906	186.3	1863
AT1G29250	Alba DNA/RNA-binding protein	Chr1	10223833	10225860	201	2010
AT1G29260	PEROXIN 7 (PEX7)	Chr1	10223833	10225860	318.7	3187
AT1G29280	WRKY DNA-BINDING PROTEIN 65 (WRKY65)	Chr1	10236356	10237686	278.1	2781
AT1G29290	B-cell lymphoma 6 protein	Chr1	10244912	10245853	177.8	1778
AT1G29300	UNFERTILIZED EMBRYO SAC 1 (UNE1)	Chr1	10248038	10249619	153.3	1533
AT1G29310	SecY protein transport family protein	Chr1	10252268	10253318	119.1	1191
AT1G29320	Transducin/WD40 repeat-like superfamily protein	Chr1	10255134	10255996	218.8	2188
AT1G29330	ENDOPLASMIC RETICULUM RETENTION DEFECTIVE 2 (ERD2)	Chr1	10260196	10261221	231.1	2311
AT1G29340	PLANT U-BOX 17 (PUB17)	Chr1	10264146	10265526	256.3	2563
AT1G29350	RNA polymerase II degradation factor-like protein (DUF1296)	Chr1	10272930	10273938	245.8	2458
AT1G29355	hypothetical protein	Chr1	10274517	10275889	247.8	2478
AT1G29357		Chr1	10274517	10275889	247.8	2478
AT1G29370	RNA polymerase II degradation factor-like protein (DUF1296)	Chr1	10282259	10283362	341.1	3411
AT1G29390	COLD REGULATED 314 THYLAKOID MEMBRANE 2 (COR314-TM2)	Chr1	10287171	10288046	247.8	2478
AT1G29400	MEI2-LIKE PROTEIN 5 (ML5)	Chr1	10292226	10294589	227.6	2276
AT1G29410	PHOSPHORIBOSYLANTHRANILATE ISOMERASE 3 (PAI3)	Chr1	10299262	10301339	210.4	2104
AT1G29465	transmembrane protein	Chr1	10308419	10309439	260.5	2605
AT1G29470	S-adenosyl-L-methionine-dependent methyltransferases superfamily protein	Chr1	10312991	10314132	303.5	3035
AT1G29530	hypothetical protein	Chr1	10326094	10326960	207.3	2073
AT1G29550	Eukaryotic initiation factor 4E protein	Chr1	10330289	10331200	261.5	2615
AT1G29590	EUKARYOTIC TRANSLATION INITIATION FACTOR 4E3 (eIF4E3)	Chr1	10339839	10340705	289.8	2898
AT1G29630	5'-3' exonuclease family protein	Chr1	10349329	10350234	279.7	2797
AT1G29640	senescence regulator (Protein of unknown function%2C DUF584)	Chr1	10355368	10356614	343.5	3435
AT1G29690	CONSTITUTIVELY ACTIVATED CELL DEATH 1 (CAD1)	Chr1	10380905	10382208	338.6	3386
AT1G29710	Tetratricopeptide repeat (TPR)-like superfamily protein	Chr1	10387037	10388503	297.7	2977
AT1G29740	Leucine-rich repeat transmembrane protein kinase	Chr1	10407137	10408413	215.9	2159
AT1G29750	RECEPTOR-LIKE KINASE IN FLOWERS 1 (RKF1)	Chr1	10419707	10420725	152.6	1526
AT1G29760	SEIPIN2	Chr1	10422156	10423441	302.1	3021
AT1G29785		Chr1	10428338	10429216	180	1800
AT1G29790	S-adenosyl-L-methionine-dependent methyltransferases superfamily protein	Chr1	10429813	10431291	190	1900
AT1G29800	RING/FYVE/PHD-type zinc finger family protein	Chr1	10432575	10433183	49.6	496
AT1G29810	Transcriptional coactivator/pterin dehydratase	Chr1	10436741	10438209	188	1880
AT1G29840	alpha/beta-Hydrolases superfamily protein	Chr1	10446713	10448436	272.7	2727
AT1G29850	double-stranded DNA-binding family protein	Chr1	10446713	10448436	268.1	2681
AT1G29880	glycyl-tRNA synthetase / glycine-tRNA ligase	Chr1	10461823	10462990	309.5	3095
AT1G29890	REDUCED WALL ACETYLATION 4 (RWA4)	Chr1	10463159	10464072	189.1	1891
AT1G29900	CARBAMOYL PHOSPHATE SYNTHETASE B (CARB)	Chr1	10467920	10469631	275.2	2752
AT1G29940	NUCLEAR RNA POLYMERASE A2 (NRPA2)	Chr1	10485723	10486994	327.3	3273
AT1G29950	SACL3	Chr1	10491623	10493612	188.3	1883
AT1G29960	Peptidase S24/S26A/S26B/S26C family protein	Chr1	10494613	10495390	137.9	1379
AT1G29965	Ribosomal protein L18ae/LX family protein	Chr1	10498600	10499516	143.9	1439
AT1G29970	60S RIBOSOMAL PROTEIN L18A-1 (RPL18AA)	Chr1	10498600	10499516	143.9	1439
AT1G29980	choice-of-anchor C domain protein%2C putative (Protein of unknown function%2C DUF642)	Chr1	10504028	10504721	44.5	445
AT1G29990	PREFOLDIN 6 (PFD6)	Chr1	10507537	10508337	135.5	1355
AT1G30000	ALPHA-MANNOSIDASE 3 (MNS3)	Chr1	10511741	10512607	209.7	2097
AT1G30010	NUCLEAR MATURASE 1 (NMAT1)	Chr1	10513088	10514193	310.1	3101
AT1G30040	GIBBERELLIN 2-OXIDASE (GA2OX2)	Chr1	10537578	10538969	276.6	2766
AT1G30070	SGS domain-containing protein	Chr1	10547228	10548305	262.9	2629
AT1G30080	Glycosyl hydrolase superfamily protein	Chr1	10551631	10553214	176.9	1769
AT1G30090	Galactose oxidase/kelch repeat superfamily protein	Chr1	10560609	10561567	283.6	2836
AT1G30100	NINE-CIS-EPOXYCAROTENOID DIOXYGENASE 5 (NCED5)	Chr1	10571274	10572934	239.3	2393
AT1G30110	NUDIX HYDROLASE HOMOLOG 25 (NUDX25)	Chr1	10582091	10582883	108.6	1086
AT1G30120	PYRUVATE DEHYDROGENASE E1 BETA (PDH-E1 BETA)	Chr1	10585743	10586688	239.5	2395
AT1G30130	DUF1365 family protein	Chr1	10587447	10588477	311.2	3112
AT1G30135	JASMONATE-ZIM-DOMAIN PROTEIN 8 (JAZ8)	Chr1	10596392	10597213	123.4	1234
AT1G30160	hypothetical protein (DUF295)	Chr1	10606128	10607063	179.4	1794
AT1G30200	F-box family protein	Chr1	10624863	10626340	266.3	2663
AT1G30210	TEOSINTE BRANCHED 1, CYCLOIDEA, AND PCF FAMILY 24 (TCP24)	Chr1	10629736	10630683	191	1910
AT1G30230	EUKARYOTIC ELONGATION FACTOR 1B BETA 1 (EEF-1BB1)	Chr1	10638758	10639884	316.8	3168
AT1G30240	proline-%2C glutamic acid/leucine-rich protein	Chr1	10645079	10646119	336.2	3362
AT1G30270	CBL-INTERACTING PROTEIN KINASE 23 (CIPK23)	Chr1	10654754	10656458	334.6	3346
AT1G30280	Chaperone DnaJ-domain superfamily protein	Chr1	10663517	10664700	177.4	1774
AT1G30282		Chr1	10663517	10664700	177.4	1774
AT1G30290	Tetratricopeptide repeat (TPR)-like superfamily protein	Chr1	10671851	10673754	290.4	2904
AT1G30300	Metallo-hydrolase/oxidoreductase superfamily protein	Chr1	10671851	10673754	281.1	2811
AT1G30320	Remorin family protein	Chr1	10680147	10681795	300.1	3001
AT1G30330	AUXIN RESPONSE FACTOR 6 (ARF6)	Chr1	10689360	10690957	343.5	3435
AT1G30360	EARLY-RESPONSIVE TO DEHYDRATION 4 (ERD4)	Chr1	10715566	10716724	345.1	3451
AT1G30400	ATP-BINDING CASSETTE C1 (ABCC1)	Chr1	10727342	10729310	273.5	2735
AT1G30410	ATP-BINDING CASSETTE C12 (ABCC12)	Chr1	10738685	10739647	142	1420
AT1G30440	Phototropic-responsive NPH3 family protein	Chr1	10758955	10760896	215.2	2152
AT1G30450	CATION-CHLORIDE CO-TRANSPORTER 1 (CCC1)	Chr1	10762616	10763506	219.4	2194
AT1G30460	CLEAVAGE AND POLYADENYLATION SPECIFICITY FACTOR 30 (CPSF30)	Chr1	10774424	10775584	212.2	2122
AT1G30470	SIT4 phosphatase-associated family protein	Chr1	10779006	10780075	337.9	3379
AT1G30480	DNA-DAMAGE-REPAIR/TOLERATION PROTEIN 111 (DRT111)	Chr1	10789169	10791439	318.1	3181
AT1G30490	PHAVOLUTA (PHV)	Chr1	10799291	10801138	318.7	3187
AT1G30500	"NUCLEAR FACTOR Y, SUBUNIT A7" (NF-YA7)	Chr1	10805785	10806372	64.3	643
AT1G30510	ROOT FNR 2 (RFNR2)	Chr1	10807897	10809837	225.6	2256
AT1G30520	ACYL-ACTIVATING ENZYME 14 (AAE14)	Chr1	10810871	10811450	110.8	1108
AT1G30530	UDP-GLUCOSYL TRANSFERASE 78D1 (UGT78D1)	Chr1	10814771	10815476	125.3	1253
AT1G30540	Actin-like ATPase superfamily protein	Chr1	10818508	10819461	275.9	2759
AT1G30550	S-adenosyl-L-methionine-dependent methyltransferase superfamily protein	Chr1	10821193	10822183	277.5	2775
AT1G30580	GTP binding protein	Chr1	10834669	10835722	286.2	2862
AT1G30590	RNA polymerase I specific transcription initiation factor RRN3 protein	Chr1	10839249	10840794	182.3	1823
AT1G30600	Subtilase family protein	Chr1	10844144	10845156	182.7	1827
AT1G30610	EMBRYO DEFECTIVE 2279 (emb2279)	Chr1	10846444	10847524	250.5	2505
AT1G30620	MURUS 4 (MUR4)	Chr1	10854499	10855972	256.6	2566
AT1G30630	Coatomer epsilon subunit	Chr1	10859416	10860416	207.1	2071
AT1G30640	Protein kinase family protein	Chr1	10860538	10861572	222.9	2229
AT1G30650	WRKY DNA-BINDING PROTEIN 14 (WRKY14)	Chr1	10868286	10869476	293	2930
AT1G30660	nucleic acid binding protein	Chr1	10876596	10877435	255.9	2559
AT1G30680	toprim domain-containing protein	Chr1	10881381	10882461	328.9	3289
AT1G30690	Sec14p-like phosphatidylinositol transfer family protein	Chr1	10887586	10889176	197.4	1974
AT1G30720	FAD-binding Berberine family protein	Chr1	10898231	10899199	116.6	1166
AT1G30730	ATBBE11	Chr1	10900881	10901781	121.5	1215
AT1G30740	ATBBE12	Chr1	10903034	10903866	139.5	1395
AT1G30755	elongation factor G%2C putative (DUF668)	Chr1	10907727	10909726	142.1	1421
AT1G30757	transmembrane protein	Chr1	10907727	10909726	288.3	2883
AT1G30760	ATBBE-LIKE 13; BERBERINE BRIDGE ENZYME-LIKE 13	Chr1	10918307	10919946	78.4	784
AT1G30800	Fasciclin-like arabinogalactan family protein	Chr1	10936919	10937814	174.7	1747
AT1G30810	JUMONJI DOMAIN-CONTAINING PROTEIN 18 (JMJ18)	Chr1	10936919	10937814	174.7	1747
AT1G30820	CTP synthase family protein	Chr1	10947021	10949504	173.6	1736
AT1G30825	DISTORTED TRICHOMES 2 (DIS2)	Chr1	10960798	10961719	284.4	2844
AT1G30845	cell growth defect protein	Chr1	10979511	10980313	243.8	2438
AT1G30860	RING/U-box superfamily protein	Chr1	10988354	10989485	231.2	2312
AT1G30880	hypothetical protein	Chr1	10993395	10994943	268.1	2681
AT1G30890	Integral membrane HRF1 family protein	Chr1	10993395	10994943	203.8	2038
AT1G30910	Molybdenum cofactor sulfurase family protein	Chr1	11000753	11001646	202.7	2027
AT1G30920	F-box family protein	Chr1	11004659	11005627	210	2100
AT1G30930	F-box family protein	Chr1	11015322	11016014	109.2	1092
AT1G30960	ERA-2	Chr1	11039111	11040215	295.3	2953
AT1G30970	SUPPRESSOR OF FRIGIDA4 (SUF4)	Chr1	11042917	11043861	313.8	3138
AT1G31010	ORGANELLAR SINGLE-STRANDED DNA BINDING PROTEIN 4 (OSB4)	Chr1	11056046	11057865	324.1	3241
AT1G31020	THIOREDOXIN O2 (TO2)	Chr1	11056046	11057865	270.4	2704
AT1G31070	N-ACETYLGLUCOSAMINE-1-PHOSPHATE URIDYLYLTRANSFERASE 1 (GlcNAc1pUT1)	Chr1	11084779	11085440	75.3	753
AT1G31120	K+ UPTAKE PERMEASE 10 (KUP10)	Chr1	11106917	11108214	294.6	2946
AT1G31130	polyadenylate-binding protein 1-B-binding protein	Chr1	11114815	11116129	308.6	3086
AT1G31150	K-box region protein (DUF1985)	Chr1	11119772	11120662	206.5	2065
AT1G31160	HISTIDINE TRIAD NUCLEOTIDE-BINDING 2 (HINT 2)	Chr1	11123331	11124332	303.3	3033
AT1G31170	SULFIREDOXIN (SRX)	Chr1	11133249	11134347	311.2	3112
AT1G31175	cytochrome C oxidase biogenesis Cmc1-like protein	Chr1	11140465	11141246	176.2	1762
AT1G31180	ISOPROPYLMALATE DEHYDROGENASE 3 (IMD3)	Chr1	11143306	11145534	187.8	1878
AT1G31190	MYO-INOSITOL MONOPHOSPHATASE LIKE 1 (IMPL1)	Chr1	11143306	11145534	173.5	1735
AT1G31220	Formyl transferase	Chr1	11156568	11157791	362.2	3622
AT1G31230	ASPARTATE KINASE-HOMOSERINE DEHYDROGENASE I (AK-HSDH I)	Chr1	11162466	11163392	259.1	2591
AT1G31240	Bromodomain transcription factor	Chr1	11163922	11165063	311.6	3116
AT1G31258		Chr1	11170818	11171753	304.1	3041
AT1G31280	ARGONAUTE 2 (AGO2)	Chr1	11181476	11183215	357.1	3571
AT1G31290	ARGONAUTE 3 (AGO3)	Chr1	11188064	11190305	246.8	2468
AT1G31300	TRAM%2C LAG1 and CLN8 (TLC) lipid-sensing domain containing protein	Chr1	11193555	11194633	266	2660
AT1G31320	LOB DOMAIN-CONTAINING PROTEIN 4 (LBD4)	Chr1	11212872	11214318	186.5	1865
AT1G31330	PHOTOSYSTEM I SUBUNIT F (PSAF)	Chr1	11215082	11216057	131.4	1314
AT1G31340	RELATED TO UBIQUITIN 1 (RUB1)	Chr1	11218752	11219531	117	1170
AT1G31350	KAR-UP F-BOX 1 (KUF1)	Chr1	11221485	11222869	266	2660
AT1G31360	RECQ HELICASE L2 (RECQL2)	Chr1	11232187	11233117	258.9	2589
AT1G31410	ENF2; ENLARGED FIL EXPRESSION DOMAIN 2	Chr1	11248490	11250499	318.4	3184
AT1G31420	FEI 1 (FEI1)	Chr1	11248490	11250499	277	2770
AT1G31430	Pentatricopeptide repeat (PPR-like) superfamily protein	Chr1	11255227	11256012	89.5	895
AT1G31440	SH3 domain-containing protein	Chr1	11257946	11258797	216.8	2168
AT1G31460	vitellogenin-2 protein	Chr1	11261734	11262751	146.6	1466
AT1G31470	NUCLEAR FUSION DEFECTIVE 4 (NFD4)	Chr1	11264176	11265123	221.8	2218
AT1G31480	SHOOT GRAVITROPISM 2 (SGR2)	Chr1	11265784	11266666	137.7	1377
AT1G31500	HESP; HESPERIN	Chr1	11275838	11276708	259.7	2597
AT1G31540	Disease resistance protein (TIR-NBS-LRR class) family	Chr1	11292120	11293917	303.7	3037
AT1G31600	TRNA METHYLTRANSFERASE 9 (TRM9)	Chr1	11315747	11316669	286.7	2867
AT1G31650	RHO GUANYL-NUCLEOTIDE EXCHANGE FACTOR 14 (ROPGEF14)	Chr1	11327149	11328601	162.5	1625
AT1G31660	bystin-like protein	Chr1	11332610	11333662	303.7	3037
AT1G31730	ADAPTOR PROTEIN COMPLEX 4E; AP4E	Chr1	11359441	11361130	345.5	3455
AT1G31760	SWIB/MDM2 domain superfamily protein	Chr1	11372846	11373625	166.8	1668
AT1G31770	ATP-BINDING CASSETTE G14 (ABCG14)	Chr1	11375675	11377826	131.2	1312
AT1G31780	oligomeric golgi complex subunit	Chr1	11391045	11392247	284.4	2844
AT1G31790	Tetratricopeptide repeat (TPR)-like superfamily protein	Chr1	11395287	11397214	155.9	1559
AT1G31800	"CYTOCHROME P450, FAMILY 97, SUBFAMILY A, POLYPEPTIDE 3" (CYP97A3)	Chr1	11395287	11397214	239.1	2391
AT1G31810	FORMIN HOMOLOGY 14 (AFH14)	Chr1	11405385	11406401	300.9	3009
AT1G31812	ACYL-COA-BINDING PROTEIN 6 (ACBP6)	Chr1	11411519	11412260	106.7	1067
AT1G31814	FRIGIDA LIKE 2 (FRL2)	Chr1	11413517	11414571	199.1	1991
AT1G31817	NUCLEAR FUSION DEFECTIVE 3 (NFD3)	Chr1	11415756	11416488	111.9	1119
AT1G31830	POLYAMINE UPTAKE TRANSPORTER 2 (PUT2)	Chr1	11419912	11420847	101.5	1015
AT1G31835	hypothetical protein	Chr1	11422790	11424791	207.6	2076
AT1G31840	Tetratricopeptide repeat (TPR)-like superfamily protein	Chr1	11422790	11424791	165.3	1653
AT1G31850	S-adenosyl-L-methionine-dependent methyltransferases superfamily protein	Chr1	11430075	11431875	259.9	2599
AT1G31860	(AT-IE)	Chr1	11435687	11437485	232	2320
AT1G31870	pre-mRNA-splicing factor of RES complex protein	Chr1	11435687	11437485	246.7	2467
AT1G31880	BREVIS RADIX (BRX)	Chr1	11445402	11446617	153.5	1535
AT1G31910	GHMP kinase family protein	Chr1	11456997	11458206	233	2330
AT1G31930	EXTRA-LARGE GTP-BINDING PROTEIN 3 (XLG3)	Chr1	11464848	11466332	235.6	2356
AT1G31940	cystic fibrosis transmembrane conductance regulator	Chr1	11470290	11471516	225.8	2258
AT1G31970	STRESS RESPONSE SUPPRESSOR 1 (STRS1)	Chr1	11479673	11481051	363.5	3635
AT1G32050	SECRETORY CARRIER MEMBRANE PROTEIN 5 (SCAMP5)	Chr1	11528282	11529441	312	3120
AT1G32070	NUCLEAR SHUTTLE INTERACTING (NSI)	Chr1	11535404	11536463	289.1	2891
AT1G32090	early-responsive to dehydration stress protein (ERD4)	Chr1	11542558	11544224	290.9	2909
AT1G32120	serine/threonine-protein phosphatase 7 long form-like protein	Chr1	11552662	11553520	197	1970
AT1G32130	(IWS1)	Chr1	11560853	11562020	214.8	2148
AT1G32150	BASIC REGION/LEUCINE ZIPPER TRANSCRIPTION FACTOR 68 (bZIP68)	Chr1	11565461	11566226	131.3	1313
AT1G32160	beta-casein (DUF760)	Chr1	11568487	11569491	251.3	2513
[truncated: 14,178 more rows]
