# Supplementary material for: H3K27me3 epigenetic mark crucial for callus cell identity and regeneration capacity
Source: Research Square preprint supplement (doi:10.21203/rs.3.rs-5582331/v1), 2025-01-24
Supplement: Supplementary file 7 [file 76f8355a4ae748a49e11f68b.docx]

| ***Table 1. Enriched GO terms for callus vs. leaf downregulated set of genes (slim)*** | | | |
| --- | --- | --- | --- |
| **GO Term** | **Corr p-Value** | **x** | **n** |
| **Biological processes** | | | |
| photosynthesis | 7.49E-76 | 171 | 230 |
| response to stress | 1.49E-65 | 1006 | 3380 |
| response to abiotic stimulus | 8.38E-63 | 610 | 1759 |
| metabolic process | 5.25E-49 | 2687 | 11968 |
| cellular process | 2.96E-43 | 2807 | 12771 |
| response to endogenous stimulus | 2.45E-26 | 464 | 1596 |
| generation of precursor metabolites and energy | 3.26E-24 | 155 | 378 |
| response to biotic stimulus | 3.83E-23 | 378 | 1275 |
| cellular homeostasis | 1.33E-19 | 136 | 345 |
| carbohydrate metabolic process | 3.10E-16 | 339 | 1218 |
| protein modification process | 5.87E-16 | 547 | 2175 |
| transport | 2.41E-15 | 574 | 2318 |
| lipid metabolic process | 1.55E-12 | 273 | 994 |
| secondary metabolic process | 2.33E-11 | 177 | 596 |
| cellular amino acid and derivative metabolic process | 2.61E-11 | 227 | 814 |
| cell death | 2.61E-11 | 62 | 145 |
| death | 2.61E-11 | 62 | 145 |
| signal transduction | 4.63E-07 | 207 | 811 |
| response to external stimulus | 1.24E-06 | 121 | 432 |
| biosynthetic process | 1.12E-05 | 1107 | 5403 |
| tropism | 3.33E-04 | 29 | 81 |
| protein metabolic process | 3.88E-03 | 893 | 4487 |
| response to extracellular stimulus | 1.43E-02 | 59 | 237 |
| transcription | 4.93E-02 | 387 | 1932 |
| **Cellular Component** | | | |
| cytoplasm | 0.00E+00 | 3257 | 13299 |
| cell | 0.00E+00 | 5068 | 23767 |
| plastid | 0.00E+00 | 1806 | 4193 |
| thylakoid | 0.00E+00 | 452 | 579 |
| membrane | 0.00E+00 | 2412 | 8900 |
| intracellular | 4.55E-56 | 4279 | 20667 |
| plasma membrane | 7.42E-43 | 1105 | 4199 |
| vacuole | 4.90E-13 | 281 | 1020 |
| cell wall | 1.77E-05 | 183 | 740 |
| external encapsulating structure | 1.89E-05 | 183 | 741 |
| extracellular region | 6.74E-04 | 608 | 2937 |
| peroxisome | 3.65E-03 | 64 | 246 |
| proteinaceous extracellular matrix | 1.89E-02 | 8 | 18 |
| **Molecular function** | | | |
| catalytic activity | 1.79E-83 | 2318 | 9272 |
| transferase activity | 9.53E-33 | 897 | 3432 |
| binding | 1.63E-32 | 2615 | 12090 |
| kinase activity | 3.11E-23 | 419 | 1450 |
| transporter activity | 1.56E-22 | 405 | 1401 |
| nucleotide binding | 8.67E-22 | 835 | 3392 |
| protein binding | 4.04E-14 | 791 | 3401 |
| hydrolase activity | 1.49E-11 | 738 | 3229 |
| signal transducer activity | 2.90E-09 | 111 | 350 |
| transcription regulator activity | 1.08E-07 | 411 | 1763 |
| transcription factor activity | 8.60E-07 | 387 | 1678 |
| carbohydrate binding | 5.56E-05 | 88 | 317 |
| receptor activity | 9.26E-05 | 40 | 118 |
| molecular function | 2.14E-04 | 5085 | 27323 |
| oxygen binding | 5.41E-04 | 65 | 234 |
| receptor binding | 1.47E-02 | 19 | 59 |
| *x - The number of genes in the sample align to a GO term* |  |  |  |
| *n - The total number of Arabidopsis genes within a GO term* |  |  |  |
| *X - The number of genes in the sample = 5586* |  |  |  |
| *N - The total number of Arabidopsis genes = 30472* |  |  |  |

| ***Table 2. Enriched GO terms for callus vs. leaf upregulated set of genes (slim)*** | | | |
| --- | --- | --- | --- |
| **GO Term** | **Corr p-Value** | **x** | **n** |
| **Biological processes** | | | |
| nucleobase, nucleoside, nucleotide and nucleic acid metabolic process | 8.07E-75 | 1042 | 3425 |
| cellular process | 2.25E-62 | 2894 | 12771 |
| cell cycle | 5.78E-53 | 217 | 423 |
| DNA metabolic process | 9.05E-44 | 221 | 481 |
| cellular component organization | 2.93E-31 | 530 | 1814 |
| metabolic process | 2.40E-30 | 2568 | 11968 |
| multicellular organismal development | 5.47E-17 | 705 | 2909 |
| transcription | 2.60E-16 | 495 | 1932 |
| biosynthetic process | 2.41E-15 | 1197 | 5403 |
| post-embryonic development | 1.98E-10 | 374 | 1509 |
| cell differentiation | 1.29E-07 | 174 | 650 |
| response to endogenous stimulus | 6.65E-07 | 370 | 1596 |
| response to abiotic stimulus | 2.29E-06 | 399 | 1759 |
| flower development | 5.11E-06 | 115 | 418 |
| regulation of gene expression, epigenetic | 1.08E-05 | 70 | 229 |
| anatomical structure morphogenesis | 1.70E-05 | 203 | 838 |
| reproduction | 5.53E-05 | 356 | 1605 |
| cellular amino acid and derivative metabolic process | 2.74E-04 | 190 | 814 |
| catabolic process | 4.25E-04 | 319 | 1460 |
| embryonic development | 5.49E-04 | 152 | 641 |
| protein modification process | 2.35E-03 | 451 | 2175 |
| growth | 3.66E-03 | 102 | 427 |
| secondary metabolic process | 8.55E-03 | 134 | 596 |
| response to stress | 1.38E-02 | 669 | 3380 |
| **Cellular Component** | | | |
| cell | 0.00E+00 | 5118 | 23767 |
| intracellular | 0.00E+00 | 4634 | 20667 |
| nucleus | 0.00E+00 | 2584 | 9874 |
| nucleolus | 1.51E-79 | 243 | 398 |
| cytosol | 1.80E-61 | 646 | 1922 |
| ribosome | 1.88E-40 | 228 | 524 |
| cytoplasm | 1.21E-28 | 2804 | 13299 |
| nucleoplasm | 9.56E-28 | 170 | 408 |
| cytoskeleton | 7.51E-20 | 139 | 355 |
| plasma membrane | 1.56E-15 | 959 | 4199 |
| nuclear envelope | 2.08E-10 | 52 | 117 |
| endoplasmic reticulum | 6.20E-06 | 212 | 867 |
| mitochondrion | 1.19E-05 | 776 | 3705 |
| cellular component | 1.21E-05 | 5417 | 29376 |
| cell wall | 4.16E-05 | 180 | 740 |
| external encapsulating structure | 4.41E-05 | 180 | 741 |
| vacuole | 2.50E-03 | 224 | 1020 |
| Golgi apparatus | 2.64E-03 | 251 | 1157 |
| membrane | 5.28E-03 | 1710 | 8900 |
| **Molecular function** | | | |
| binding | 5.41E-59 | 2750 | 12090 |
| structural molecule activity | 1.39E-42 | 249 | 582 |
| nucleic acid binding | 2.78E-39 | 1161 | 4553 |
| DNA binding | 2.39E-38 | 748 | 2662 |
| protein binding | 2.00E-37 | 907 | 3401 |
| nucleotide binding | 1.46E-28 | 866 | 3392 |
| catalytic activity | 4.37E-18 | 1968 | 9272 |
| hydrolase activity | 1.59E-10 | 728 | 3229 |
| nuclease activity | 2.50E-09 | 84 | 242 |
| motor activity | 8.11E-09 | 41 | 90 |
| transcription factor activity | 8.28E-07 | 386 | 1678 |
| transcription regulator activity | 1.65E-06 | 401 | 1763 |
| transferase activity | 1.40E-05 | 722 | 3432 |
| RNA binding | 9.25E-05 | 347 | 1570 |
| chromatin binding | 4.61E-04 | 38 | 119 |
| translation factor activity, nucleic acid binding | 3.95E-03 | 49 | 181 |
| *x - The number of genes in the sample align to a GO term* |  |  |  |
| *n - The total number of Arabidopsis genes within a GO term* |  |  |  |
| *X - The number of genes in the sample = 5563* |  |  |  |
| *N - The total number of Arabidopsis genes = 30472* |  |  |  |

***Table 5. List of primers used in this work***

| ***Table 5. List of primers used in this work*** | | |
| --- | --- | --- |
| **Primer Name** | **Sequence** | **comment** |
| **Genotyping** | | |
| *emf2-1*geno_fwd | AACAACAAATTGCAGAAGACTGAAG | *emf2-1* genotyping (427) |
| *emf2-1*geno_rev | CTTGGATATCATTGTCTCAGTCTTG | *emf2-1* genotyping (428) |
| **ChIP validation** | | |
| SAG12_first_exon_fwd | AAGGAGGAAAACAATCGCTAC | *Negative for H3K4me3 in calli  *Positive for H3K27me3 in calli (437) |
| SAG12_first_exon_rev | GCAAACTGATTTACCGCAAG | *Negative for H3K4me3 in calli  *Positive for H3K27me3 in calli (438) |
| SAG12_downstream_fwd | CGTCATCGTCTTCTTCTTTCTC | *Positive for H3K4me3 in calli  (439) |
| SAG12_downstream_rev | GCTATGCCAGAAACCTTCGT | *Positive for H3K4me3 in calli  (440) |
| ACT2_fwd | GCTGGATCTCGATCTTGTTTTC | *Negative for H3K27me3 calli (444) |
| ACT2_rev | CTCTCCATCAAGGTCAAGCC | *Negative for H3K27me3 calli (446) |
