# Supplementary material for: H3K27me3 epigenetic mark crucial for callus cell identity and regeneration capacity
Source: Research Square preprint supplement (doi:10.21203/rs.3.rs-5582331/v1), 2025-01-24
Supplement: Supplementary file 8 [file 9b2867fa74823d4442caa1ba.xlsx]

## Sheet: 1950 development genes in wt ca
Table 3. Gene Ontology analysis on the 1950 callus-developmental genes
File created with bingo
ontology: namespace
curator: bingo
Selected ontology file : bundle://113.0:1/data/GO_Full
Selected annotation file : C:\Users\user\gene_association.tair
Discarded evidence codes :
Overrepresentation
Selected statistical test : Hypergeometric test
Selected correction : Benjamini & Hochberg False Discovery Rate (FDR) correction
Selected significance level : 0.05
Testing option : Use whole annotation as reference set
The selected cluster :
AT5G42890	AT3G56990	AT2G30950	AT3G53480	AT2G15790	AT4G35460	AT5G03280	AT1G03910	AT1G43130	AT2G24260	AT5G37055	AT1G79560	AT2G02470	AT5G13080	AT5G22800	AT2G25110	AT5G19620	AT3G19580	AT2G38440	AT4G37650	AT4G14510	AT1G69770	AT5G53550	AT5G55730	AT2G34090	AT1G78240	AT2G04660	AT1G01720	AT2G02480	AT3G63290	AT1G77390	AT1G10670	AT5G45940	AT5G17430	AT5G27230	AT1G67120	AT5G63370	AT5G49070	AT1G69780	AT3G44540	AT3G43210	AT1G80100	AT5G44610	AT1G79580	AT4G00330	AT4G02990	AT1G09230	AT3G07130	AT3G54320	AT5G56600
AT4G30580	AT1G64405	AT3G23290	AT5G47200	AT5G24520	AT1G15440	AT5G23670	AT3G50870	AT1G13260	AT2G11890	AT4G07410	AT4G22970	AT1G31930	AT2G30130	AT2G42590	AT2G22540	AT1G75540	AT1G03010	AT4G17695	AT1G06520	AT5G22330	AT3G03690	AT5G23660	AT1G23080	AT1G16300	AT5G44180	AT1G06515	AT3G13490	AT5G10360	AT3G01040	AT3G27670	AT5G47220	AT3G51780	AT4G29140	AT2G02955	AT5G10330	AT2G01620	AT1G17690	AT5G60200	AT3G18715	AT1G51590	AT1G21700	AT5G41920	AT2G45680	AT3G54810	AT4G16340	AT5G57020	AT2G36740	AT5G22790	AT4G21670
AT3G29035	AT4G00220	AT4G01550	AT1G55020	AT3G54430	AT5G62165	AT3G22400	AT3G50070	AT5G05560	AT5G51020	AT5G13180	AT4G12680	AT2G25010	AT4G30920	AT4G01540	AT1G08260	AT3G33520	AT3G18390	AT2G35270	AT1G14920	AT2G36120	AT1G67490	AT1G12740	AT4G14850	AT1G21690	AT1G69670	AT4G34040	AT3G07260	AT3G08590	AT1G10130	AT3G54010	AT2G48160	AT4G30930	AT3G22420	AT4G27760	AT4G26430	AT2G39200	AT3G47710	AT4G13510	AT3G44200	AT5G02030	AT5G45600	AT5G51040	AT3G05090	AT5G09900	AT1G68765	AT4G01520	AT1G33240	AT5G27320	AT5G17520
AT2G01505	AT5G37930	AT2G46410	AT5G35750	AT4G14040	AT1G43850	AT4G13195	AT3G05530	AT3G28630	AT3G04680	AT1G10940	AT4G21550	AT5G11310	AT4G28190	AT4G29040	AT1G17580	AT1G02050	AT1G22920	AT2G37920	AT1G02090	AT3G04690	AT1G76710	AT1G73680	AT1G51450	AT5G60340	AT3G60350	AT2G02850	AT5G62520	AT1G27340	AT4G17530	AT5G58010	AT2G46870	AT3G06400	AT5G45190	AT5G62990	AT4G23750	AT5G07280	AT3G58040	AT5G08120	AT2G46400	AT1G78900	AT5G10440	AT3G60360	AT4G29060	AT1G06430	AT5G02820	AT1G17920	AT5G18820	AT4G21100	AT4G05530
AT3G01610	AT4G14713	AT5G16310	AT5G19820	AT4G28980	AT3G21200	AT5G23080	AT1G26840	AT4G37450	AT3G45640	AT5G57710	AT2G28890	AT5G13290	AT1G13980	AT1G10470	AT4G24150	AT5G16780	AT1G71820	AT1G66470	AT3G30180	AT1G14830	AT1G01550	AT5G53360	AT4G13850	AT5G55540	AT5G02130	AT3G63060	AT1G10480	AT1G34430	AT1G55350	AT2G44900	AT1G56200	AT1G71830	AT3G03810	AT3G21220	AT5G63160	AT3G60800	AT4G37470	AT3G14940	AT2G27100	AT3G63070	AT2G26250	AT2G03150	AT5G22640	AT3G51460	AT5G49680	AT4G29860	AT5G63510	AT3G63440	AT2G38280
AT3G62680	AT4G19600	AT5G61760	AT3G63530	AT4G36920	AT4G34740	AT3G16785	AT2G45450	AT4G18750	AT2G35620	AT5G01600	AT3G02150	AT3G63500	AT1G16570	AT5G49660	AT1G17420	AT1G18750	AT2G45420	AT5G08230	AT2G41060	AT5G62640	AT4G28080	AT2G26700	AT4G35600	AT3G53700	AT4G36930	AT5G41700	AT1G43710	AT3G04340	AT4G24960	AT1G05470	AT5G61780	AT2G31270	AT2G34780	AT2G45430	AT5G64813	AT1G53500	AT1G29410	AT1G49005	AT5G60450	AT2G25840	AT1G28560	AT4G13040	AT1G64625	AT3G57200	AT4G05410	AT4G08920	AT4G24972	AT4G02380	AT3G56350
AT4G28860	AT1G02730	AT5G53470	AT2G42620	AT5G46700	AT5G12080	AT3G29290	AT1G11680	AT1G68530	AT2G35060	AT4G26690	AT3G22200	AT1G66350	AT3G25710	AT4G20910	AT4G15910	AT5G02250	AT3G11540	AT5G20920	AT3G07050	AT1G13870	AT1G56560	AT2G42600	AT5G27540	AT1G68540	AT2G37250	AT2G18510	AT4G28880	AT1G14720	AT1G19180	AT4G38680	AT5G05770	AT4G15900	AT3G13730	AT3G07060	AT3G10220	AT3G63190	AT3G12400	AT2G26130	AT2G26170	AT3G54610	AT3G05680	AT1G64110	AT5G51640	AT3G52430	AT1G12910	AT5G46290	AT3G20840	AT5G07120	AT5G08450
AT1G04020	AT2G35510	AT3G27560	AT5G22650	AT3G02280	AT3G04460	AT1G64980	AT1G16460	AT1G18640	AT5G08370	AT3G16440	AT5G13710	AT1G71270	AT2G42280	AT3G12080	AT5G11530	AT5G64930	AT1G14290	AT5G56080	AT1G04010	AT1G09700	AT1G20960	AT5G14220	AT4G03110	AT4G02260	AT2G36890	AT1G24450	AT1G20090	AT5G57740	AT5G04410	AT2G46690	AT2G22240	AT4G13395	AT4G15570	AT5G52050	AT1G35580	AT5G27520	AT4G40090	AT5G15540	AT1G71696	AT1G69380	AT1G25310	AT2G46225	AT1G74720	AT3G47500	AT1G48410	AT5G67570	AT1G80180	AT1G62750	AT5G42270
No annotations were retrieved for the following entities:
GO-ID	p-value	corr p-value	x	n	X	N	Description	Genes in test set
3	0	0	984	1605	1950	30472	reproduction	AT5G17690|AT5G63110|AT3G51060|AT2G15790|AT4G35460|AT5G02190|AT1G19270|AT1G03910|AT5G37055|AT1G79560|AT5G22800|AT4G23250|AT5G40480|AT5G19620|AT1G32230|AT3G19580|AT4G24580|AT4G14510|AT1G69770|AT5G53550|AT3G44750|AT2G34090|AT2G41850|AT1G53160|AT5G50280|AT4G01430|AT3G55400|AT1G09000|AT5G40010|AT5G27230|AT1G69780|AT5G54650|AT1G01510|AT2G28880|AT4G26300|AT4G27630|AT4G02990|AT3G54560|AT1G09230|AT3G07130…
9653	0	0	488	838	1950	30472	anatomical structure morphogenesis	AT5G17690|AT4G21060|AT3G06010|AT4G29900|AT3G08550|AT3G05040|AT5G03280|AT1G19270|AT2G24260|AT2G02470|AT4G14880|AT3G12810|AT5G13080|AT1G56580|AT1G55250|AT1G32230|AT5G18410|AT3G56640|AT2G38440|AT2G17720|AT4G24580|AT2G48120|AT2G02480|AT1G54490|AT5G20730|AT4G00220|AT4G00100|AT1G55020|AT5G18520|AT1G08030|AT5G17430|AT2G14120|AT1G33430|AT5G63370|AT3G22400|AT1G69780|AT5G54650|AT3G43210|AT5G04470|AT5G44610…
9790	0	0	438	641	1950	30472	embryonic development	AT4G20090|AT2G41720|AT5G63110|AT5G56930|AT5G49160|AT5G02190|AT1G03910|AT3G18110|AT5G45800|AT1G79560|AT5G22800|AT4G00231|AT4G23250|AT4G01560|AT5G40480|AT5G19620|AT4G21190|AT1G32230|AT3G19580|AT1G69770|AT3G20440|AT2G34090|AT5G50280|AT5G64580|AT1G69780|AT5G05560|AT4G37300|AT2G28880|AT1G08260|AT4G26300|AT1G12980|AT4G02990|AT3G18390|AT2G39990|AT1G21690|AT1G69670|AT5G57930|AT1G79230|AT3G14900|AT1G79350…
9791	0	0	1051	1509	1950	30472	post-embryonic development	AT5G17690|AT5G42890|AT5G63110|AT3G51060|AT2G15790|AT4G35460|AT5G02190|AT1G19270|AT1G03910|AT5G37055|AT1G79560|AT5G13080|AT5G22800|AT4G23250|AT5G40480|AT5G19620|AT1G32230|AT3G19580|AT2G14210|AT4G26760|AT4G14510|AT1G69770|AT5G53550|AT3G44750|AT2G34090|AT2G41850|AT3G07360|AT1G53160|AT5G50280|AT4G38740|AT4G01430|AT3G55400|AT1G09000|AT5G40010|AT1G80340|AT5G27230|AT1G69780|AT5G54650|AT1G01510|AT2G28880…
9793	0	0	427	626	1950	30472	embryonic development ending in seed dormancy	AT4G20090|AT2G41720|AT5G63110|AT5G56930|AT5G49160|AT5G02190|AT1G03910|AT3G18110|AT5G45800|AT1G79560|AT5G22800|AT4G00231|AT4G23250|AT4G01560|AT5G40480|AT5G19620|AT4G21190|AT1G32230|AT3G19580|AT1G69770|AT3G20440|AT2G34090|AT5G50280|AT5G64580|AT1G69780|AT5G05560|AT4G37300|AT2G28880|AT1G08260|AT4G26300|AT1G12980|AT4G02990|AT3G18390|AT2G39990|AT1G21690|AT1G69670|AT5G57930|AT1G79230|AT3G14900|AT1G79350…
9987	0	0	1625	12771	1950	30472	cellular process	AT5G42890|AT2G30950|AT3G53480|AT2G15790|AT4G35460|AT5G03280|AT1G03910|AT2G24260|AT5G37055|AT2G02470|AT5G13080|AT5G22800|AT2G25110|AT5G19620|AT3G19580|AT2G38440|AT4G37650|AT4G14510|AT1G69770|AT5G53550|AT1G78240|AT2G04660|AT1G01720|AT2G02480|AT1G77390|AT1G10670|AT5G45940|AT5G17430|AT5G27230|AT1G67120|AT5G63370|AT5G49070|AT1G69780|AT3G44540|AT3G43210|AT1G80100|AT5G44610|AT1G79580|AT4G00330|AT4G02990…
10154	0	0	536	796	1950	30472	fruit development	AT4G24210|AT4G20090|AT2G41720|AT5G63110|AT5G56930|AT5G49160|AT4G35460|AT5G02190|AT1G19270|AT1G03910|AT3G18110|AT3G44880|AT5G45800|AT1G79560|AT1G75080|AT5G22800|AT4G00231|AT4G23250|AT4G01560|AT5G40480|AT1G55250|AT5G19620|AT4G21190|AT1G32230|AT3G19580|AT5G66730|AT2G38560|AT4G14510|AT1G69770|AT3G20440|AT5G53550|AT3G44750|AT2G34090|AT5G50280|AT4G01430|AT5G40010|AT5G64580|AT3G50070|AT1G02720|AT1G69780…
3006	0	0	957	1449	1950	30472	reproductive developmental process	AT5G17690|AT5G63110|AT3G51060|AT2G15790|AT4G35460|AT5G02190|AT1G19270|AT1G03910|AT5G37055|AT1G79560|AT5G22800|AT4G23250|AT5G40480|AT5G19620|AT1G32230|AT3G19580|AT4G24580|AT4G14510|AT1G69770|AT5G53550|AT3G44750|AT2G34090|AT2G41850|AT1G53160|AT5G50280|AT4G01430|AT3G55400|AT1G09000|AT5G40010|AT5G27230|AT1G69780|AT5G54650|AT1G01510|AT2G28880|AT4G26300|AT4G27630|AT4G02990|AT3G54560|AT1G09230|AT3G22990…
22414	0	0	977	1576	1950	30472	reproductive process	AT5G17690|AT5G63110|AT3G51060|AT2G15790|AT4G35460|AT5G02190|AT1G19270|AT1G03910|AT5G37055|AT1G79560|AT5G22800|AT4G23250|AT5G40480|AT5G19620|AT1G32230|AT3G19580|AT4G24580|AT4G14510|AT1G69770|AT5G53550|AT3G44750|AT2G34090|AT2G41850|AT1G53160|AT5G50280|AT4G01430|AT3G55400|AT1G09000|AT5G40010|AT5G27230|AT1G69780|AT5G54650|AT1G01510|AT2G28880|AT4G26300|AT4G27630|AT4G02990|AT3G54560|AT1G09230|AT3G07130…
22622	0	0	341	434	1950	30472	root system development	AT1G44900|AT3G03660|AT4G21060|AT3G06010|AT3G08550|AT3G05040|AT3G53480|AT3G06810|AT3G04630|AT5G03280|AT5G37850|AT1G50460|AT2G24260|AT3G16857|AT2G02470|AT5G13080|AT2G35610|AT1G64520|AT5G14170|AT1G32230|AT4G35910|AT2G17720|AT2G14210|AT4G29350|AT5G43070|AT3G23940|AT1G48380|AT5G16910|AT4G26760|AT1G74560|AT2G01830|AT5G55730|AT4G30340|AT1G78240|AT3G07360|AT1G04550|AT1G36160|AT1G73590|AT5G20730|AT1G55020…
7275	0	0	1950	2909	1950	30472	multicellular organismal development	AT5G42890|AT3G56990|AT2G30950|AT3G53480|AT2G15790|AT4G35460|AT5G03280|AT1G03910|AT1G43130|AT2G24260|AT5G37055|AT1G79560|AT2G02470|AT5G13080|AT5G22800|AT2G25110|AT5G19620|AT3G19580|AT2G38440|AT4G37650|AT4G14510|AT1G69770|AT5G53550|AT5G55730|AT2G34090|AT1G78240|AT2G04660|AT1G01720|AT2G02480|AT3G63290|AT1G77390|AT1G10670|AT5G45940|AT5G17430|AT5G27230|AT1G67120|AT5G63370|AT5G49070|AT1G69780|AT3G44540…
48316	0	0	518	769	1950	30472	seed development	AT4G24210|AT4G20090|AT2G41720|AT5G63110|AT5G56930|AT5G49160|AT4G35460|AT5G02190|AT1G19270|AT1G03910|AT3G18110|AT5G45800|AT1G79560|AT1G75080|AT5G22800|AT4G00231|AT4G23250|AT4G01560|AT5G40480|AT1G55250|AT5G19620|AT4G21190|AT1G32230|AT3G19580|AT5G66730|AT2G38560|AT4G14510|AT1G69770|AT3G20440|AT5G53550|AT3G44750|AT2G34090|AT5G50280|AT4G01430|AT5G40010|AT5G64580|AT3G50070|AT1G02720|AT1G69780|AT5G54650…
48513	0	0	843	1201	1950	30472	organ development	AT5G17690|AT4G21060|AT3G06010|AT3G53480|AT3G51060|AT2G15790|AT5G03280|AT1G19270|AT2G24260|AT2G27530|AT2G02470|AT5G13080|AT5G14170|AT1G32230|AT3G06020|AT2G38440|AT2G17720|AT2G14210|AT3G21640|AT4G26760|AT4G37650|AT5G55730|AT2G41850|AT1G78240|AT3G07360|AT2G02480|AT1G54490|AT4G12570|AT2G26670|AT3G55400|AT1G10670|AT4G00100|AT5G18520|AT5G17430|AT1G11760|AT1G69780|AT5G54650|AT1G80100|AT5G44610|AT1G79580…
48608	0	0	872	1272	1950	30472	reproductive structure development	AT5G17690|AT5G63110|AT3G51060|AT2G15790|AT4G35460|AT5G02190|AT1G19270|AT1G03910|AT5G37055|AT1G79560|AT5G22800|AT4G23250|AT5G40480|AT5G19620|AT1G32230|AT3G19580|AT4G14510|AT1G69770|AT5G53550|AT3G44750|AT2G34090|AT2G41850|AT1G53160|AT5G50280|AT4G01430|AT3G55400|AT1G09000|AT5G40010|AT5G27230|AT1G69780|AT5G54650|AT1G01510|AT2G28880|AT4G26300|AT4G27630|AT4G02990|AT3G54560|AT1G09230|AT3G22990|AT5G66870…
48731	0	0	844	1202	1950	30472	system development	AT5G17690|AT4G21060|AT3G06010|AT3G53480|AT3G51060|AT2G15790|AT5G03280|AT1G19270|AT2G24260|AT2G27530|AT2G02470|AT5G13080|AT5G14170|AT1G32230|AT3G06020|AT2G38440|AT2G17720|AT2G14210|AT3G21640|AT4G26760|AT4G37650|AT5G55730|AT2G41850|AT1G78240|AT3G07360|AT2G02480|AT1G54490|AT4G12570|AT2G26670|AT3G55400|AT1G10670|AT4G00100|AT5G18520|AT5G17430|AT1G11760|AT1G69780|AT5G54650|AT1G80100|AT5G44610|AT1G79580…
48856	0	0	1522	2369	1950	30472	anatomical structure development	AT5G17690|AT4G21060|AT3G06010|AT5G63110|AT3G53480|AT3G51060|AT2G15790|AT4G35460|AT5G02190|AT5G03280|AT1G19270|AT1G03910|AT2G24260|AT2G27530|AT5G37055|AT1G79560|AT2G02470|AT5G13080|AT5G22800|AT4G23250|AT5G14170|AT5G40480|AT5G19620|AT1G32230|AT3G06020|AT3G19580|AT2G38440|AT2G17720|AT2G14210|AT3G21640|AT4G24580|AT4G26760|AT4G37650|AT4G14510|AT1G69770|AT5G53550|AT3G44750|AT5G55730|AT2G34090|AT2G41850…
32501	0	0	1950	3017	1950	30472	multicellular organismal process	AT5G42890|AT3G56990|AT2G30950|AT3G53480|AT2G15790|AT4G35460|AT5G03280|AT1G03910|AT1G43130|AT2G24260|AT5G37055|AT1G79560|AT2G02470|AT5G13080|AT5G22800|AT2G25110|AT5G19620|AT3G19580|AT2G38440|AT4G37650|AT4G14510|AT1G69770|AT5G53550|AT5G55730|AT2G34090|AT1G78240|AT2G04660|AT1G01720|AT2G02480|AT3G63290|AT1G77390|AT1G10670|AT5G45940|AT5G17430|AT5G27230|AT1G67120|AT5G63370|AT5G49070|AT1G69780|AT3G44540…
32502	0	0	1950	3119	1950	30472	developmental process	AT5G42890|AT3G56990|AT2G30950|AT3G53480|AT2G15790|AT4G35460|AT5G03280|AT1G03910|AT1G43130|AT2G24260|AT5G37055|AT1G79560|AT2G02470|AT5G13080|AT5G22800|AT2G25110|AT5G19620|AT3G19580|AT2G38440|AT4G37650|AT4G14510|AT1G69770|AT5G53550|AT5G55730|AT2G34090|AT1G78240|AT2G04660|AT1G01720|AT2G02480|AT3G63290|AT1G77390|AT1G10670|AT5G45940|AT5G17430|AT5G27230|AT1G67120|AT5G63370|AT5G49070|AT1G69780|AT3G44540…
48364	4.9000E-324	0	339	432	1950	30472	root development	AT1G44900|AT3G03660|AT4G21060|AT3G06010|AT3G08550|AT3G05040|AT3G53480|AT3G06810|AT3G04630|AT5G03280|AT5G37850|AT1G50460|AT2G24260|AT3G16857|AT2G02470|AT5G13080|AT2G35610|AT1G64520|AT5G14170|AT1G32230|AT4G35910|AT2G17720|AT2G14210|AT4G29350|AT5G43070|AT3G23940|AT1G48380|AT5G16910|AT4G26760|AT1G74560|AT2G01830|AT5G55730|AT4G30340|AT1G78240|AT3G07360|AT1G04550|AT1G36160|AT1G73590|AT5G20730|AT1G55020…
48869	7.3544E-317	0	450	848	1950	30472	cellular developmental process	AT5G17690|AT4G21060|AT3G06010|AT3G08550|AT5G03280|AT2G24260|AT5G37055|AT2G02470|AT4G14880|AT3G12810|AT5G13080|AT1G56580|AT5G18410|AT3G56640|AT2G38440|AT2G17720|AT4G24580|AT4G33050|AT4G37890|AT2G02480|AT1G77390|AT1G54490|AT4G00100|AT1G08030|AT5G57800|AT2G14120|AT5G27230|AT1G33430|AT5G63370|AT1G22770|AT3G44540|AT5G04470|AT5G44610|AT2G47000|AT1G01510|AT4G13890|AT4G38630|AT5G65420|AT1G12860|AT1G67490…
65007	5.439e-299	0	1048	5524	1950	30472	biological regulation	AT5G17690|AT3G06010|AT2G30950|AT5G63110|AT3G53480|AT3G51060|AT4G35460|AT5G03280|AT1G19270|AT2G24260|AT5G37055|AT2G02470|AT5G13080|AT2G25110|AT5G14170|AT3G06020|AT3G19580|AT2G38440|AT2G14210|AT4G24580|AT4G37650|AT4G33050|AT1G69770|AT5G53550|AT3G44750|AT1G53160|AT1G01720|AT1G77390|AT1G54490|AT1G01960|AT4G38740|AT2G26670|AT1G10670|AT1G09000|AT5G17430|AT5G63370|AT1G11760|AT1G69780|AT5G44610|AT1G79580…
9888	1.4018e-298	0	342	486	1950	30472	tissue development	AT1G44900|AT4G21060|AT3G06010|AT3G08550|AT3G06810|AT3G05840|AT2G15790|AT2G22640|AT5G62940|AT3G15880|AT5G03280|AT1G71040|AT1G52880|AT2G18390|AT1G27320|AT5G37850|AT1G50460|AT5G05340|AT2G24260|AT3G16857|AT2G02470|AT5G13080|AT2G35610|AT1G20700|AT3G49670|AT1G56580|AT5G18410|AT3G06020|AT2G38440|AT4G11920|AT2G17720|AT1G48380|AT4G20780|AT5G16910|AT5G44280|AT2G42260|AT5G61960|AT1G13180|AT4G17460|AT4G24900…
30154	3.7854e-288	0	381	650	1950	30472	cell differentiation	AT5G26720|AT5G17690|AT4G21060|AT3G49780|AT3G06010|AT3G08550|AT3G06810|AT2G22640|AT5G03280|AT2G20585|AT1G76850|AT5G37850|AT1G50460|AT2G24260|AT5G37055|AT2G02470|AT4G14880|AT3G12810|AT5G13080|AT2G35610|AT3G49670|AT1G56580|AT5G18410|AT3G56640|AT2G38440|AT4G11920|AT2G17720|AT1G48380|AT4G20780|AT1G30970|AT4G24580|AT5G16910|AT5G44280|AT4G33050|AT2G42260|AT1G74560|AT4G37890|AT1G13180|AT2G02480|AT4G32880…
9908	1.2012e-253	0	293	418	1950	30472	flower development	AT5G46210|AT5G17690|AT3G07220|AT5G21150|AT4G15180|AT1G48270|AT3G51060|AT2G15790|AT1G75520|AT1G19270|AT1G52880|AT3G44880|AT1G79200|AT5G37055|AT1G75080|AT3G12810|AT1G64520|AT5G65080|AT3G49670|AT5G23320|AT1G30970|AT3G57290|AT2G40080|AT1G76500|AT3G56090|AT4G03190|AT1G28420|AT1G01040|AT1G51660|AT2G41850|AT4G17460|AT1G53160|AT1G73590|AT5G58560|AT1G64405|AT3G55400|AT1G09000|AT3G28860|AT2G36910|AT5G27230…
22621	3.71e-234	0	280	416	1950	30472	shoot system development	AT5G46210|AT5G17690|AT4G29900|AT3G05040|AT5G49720|AT2G22640|AT3G15880|AT1G75640|AT3G10870|AT3G16857|AT1G64520|AT1G20700|AT1G56580|AT3G50660|AT1G55250|AT5G18410|AT5G23320|AT3G54220|AT2G38440|AT4G29350|AT3G21640|AT4G20780|AT4G37650|AT2G42260|AT3G56090|AT5G55730|AT1G01160|AT1G13180|AT4G30340|AT1G78240|AT3G48430|AT2G48120|AT1G36160|AT2G02480|AT1G73590|AT5G20730|AT4G32880|AT1G10670|AT5G24520|AT4G00100…
48367	3.71e-234	0	280	416	1950	30472	shoot development	AT5G46210|AT5G17690|AT4G29900|AT3G05040|AT5G49720|AT2G22640|AT3G15880|AT1G75640|AT3G10870|AT3G16857|AT1G64520|AT1G20700|AT1G56580|AT3G50660|AT1G55250|AT5G18410|AT5G23320|AT3G54220|AT2G38440|AT4G29350|AT3G21640|AT4G20780|AT4G37650|AT2G42260|AT3G56090|AT5G55730|AT1G01160|AT1G13180|AT4G30340|AT1G78240|AT3G48430|AT2G48120|AT1G36160|AT2G02480|AT1G73590|AT5G20730|AT4G32880|AT1G10670|AT5G24520|AT4G00100…
48229	4.2247e-229	0	277	417	1950	30472	gametophyte development	AT3G11964|AT1G09100|AT5G21150|AT3G56990|AT5G22000|AT5G64560|AT3G57280|AT2G39880|AT3G09090|AT2G01820|AT2G18390|AT2G20585|AT3G49670|AT1G15110|AT3G23940|AT2G32460|AT4G33050|AT2G42260|AT4G37890|AT4G03190|AT5G11110|AT3G53810|AT3G45040|AT2G04660|AT3G63290|AT1G77390|AT1G01960|AT2G30490|AT2G35940|AT3G02230|AT1G15440|AT5G23670|AT1G61140|AT1G14350|AT5G17310|AT3G09660|AT5G57800|AT1G67120|AT1G33430|AT1G23190…
50789	4.6458e-228	0	878	4734	1950	30472	regulation of biological process	AT5G17690|AT3G06010|AT2G30950|AT5G63110|AT3G51060|AT4G35460|AT5G03280|AT1G19270|AT2G24260|AT5G37055|AT2G02470|AT5G13080|AT2G25110|AT5G14170|AT3G06020|AT3G19580|AT2G38440|AT2G14210|AT4G24580|AT4G37650|AT4G33050|AT1G69770|AT3G44750|AT1G53160|AT1G01720|AT1G77390|AT1G54490|AT1G01960|AT4G38740|AT2G26670|AT1G10670|AT1G09000|AT5G17430|AT5G63370|AT1G11760|AT1G69780|AT5G44610|AT1G79580|AT1G01510|AT4G29810…
48569	1.5619e-193	0	225	321	1950	30472	post-embryonic organ development	AT3G07220|AT5G21150|AT4G15180|AT3G51060|AT1G19270|AT1G52880|AT2G27530|AT1G75080|AT3G12810|AT5G13080|AT1G64520|AT3G49670|AT1G32230|AT4G35910|AT2G14210|AT4G29350|AT5G43070|AT4G26760|AT1G74560|AT4G03190|AT1G51660|AT2G41850|AT3G07360|AT5G20730|AT5G58560|AT1G64405|AT3G55400|AT1G55020|AT3G28860|AT1G13260|AT2G36910|AT1G17980|AT4G07410|AT3G22400|AT2G42590|AT3G15540|AT5G05560|AT1G01510|AT4G38630|AT5G26930…
50794	1.625e-189	0	770	4201	1950	30472	regulation of cellular process	AT5G17690|AT3G06010|AT2G30950|AT5G63110|AT3G51060|AT4G35460|AT5G03280|AT2G24260|AT5G37055|AT2G02470|AT5G13080|AT5G14170|AT3G19580|AT2G38440|AT2G14210|AT4G24580|AT4G37650|AT4G33050|AT1G69770|AT3G44750|AT1G53160|AT1G01720|AT1G77390|AT1G54490|AT1G01960|AT4G38740|AT2G26670|AT1G09000|AT5G17430|AT5G63370|AT1G11760|AT1G69780|AT5G44610|AT1G79580|AT1G01510|AT4G29810|AT4G02990|AT1G59750|AT3G54560|AT3G54320…
5515	8.4216e-187	0	683	3401	1950	30472	protein binding	AT4G24210|AT5G17690|AT1G09100|AT3G06010|AT4G29900|AT3G05040|AT5G63110|AT2G15430|AT5G49160|AT3G51060|AT5G03280|AT1G19270|AT1G03910|AT5G05340|AT2G24260|AT5G37055|AT2G02470|AT1G75080|AT4G14880|AT3G12810|AT5G14170|AT5G40480|AT1G55250|AT1G32230|AT5G18410|AT3G54220|AT1G09570|AT2G38440|AT5G66730|AT5G65640|AT2G14210|AT3G21640|AT4G24580|AT4G26760|AT4G37650|AT4G33050|AT4G37770|AT3G07360|AT2G04660|AT1G77390…
5488	2.1106e-186	0	1388	12090	1950	30472	binding	AT5G17690|AT4G21060|AT3G06010|AT5G42890|AT2G30950|AT5G63110|AT3G53480|AT3G51060|AT2G15790|AT5G03280|AT1G19270|AT1G03910|AT2G24260|AT2G27530|AT5G37055|AT1G79560|AT2G02470|AT5G13080|AT5G22800|AT5G14170|AT5G40480|AT1G32230|AT3G19580|AT2G38440|AT2G17720|AT2G14210|AT3G21640|AT4G24580|AT4G26760|AT4G37650|AT4G33050|AT4G14510|AT4G37890|AT1G69770|AT3G44750|AT3G07360|AT2G04660|AT1G53160|AT1G01720|AT2G02480…
16043	5.7572e-183	0	488	1814	1950	30472	cellular component organization	AT5G17690|AT3G06010|AT3G08550|AT2G30950|AT5G63110|AT5G49160|AT5G37055|AT2G02470|AT4G14880|AT3G12810|AT4G01560|AT5G14170|AT1G56580|AT1G55250|AT5G19620|AT5G18410|AT3G56640|AT2G38440|AT3G52280|AT4G24580|AT4G26760|AT4G33050|AT4G37890|AT1G69770|AT3G44750|AT2G41850|AT2G48120|AT2G04660|AT2G02480|AT1G54490|AT4G00100|AT1G55020|AT2G14120|AT1G67120|AT1G33430|AT5G63370|AT1G02720|AT5G54650|AT3G43210|AT5G05560…
44237	2.245e-181	0	1237	9978	1950	30472	cellular metabolic process	AT5G17690|AT4G21060|AT5G42890|AT2G30950|AT5G63110|AT2G15790|AT4G35460|AT1G03910|AT2G24260|AT2G27530|AT2G02470|AT5G13080|AT5G22800|AT2G25110|AT4G23250|AT5G14170|AT1G32230|AT3G19580|AT2G17720|AT2G14210|AT3G21640|AT4G37650|AT4G14510|AT1G69770|AT3G44750|AT1G78240|AT3G07360|AT2G04660|AT1G53160|AT1G01720|AT2G02480|AT1G54490|AT4G12570|AT4G38740|AT2G26670|AT3G55400|AT1G10670|AT4G00100|AT5G45940|AT1G09000…
48827	6.6996e-178	0	211	308	1950	30472	phyllome development	AT5G46210|AT3G05040|AT2G22640|AT1G64520|AT1G56580|AT3G50660|AT1G55250|AT5G18410|AT3G54220|AT2G38440|AT4G29350|AT3G21640|AT4G20780|AT4G37650|AT2G42260|AT3G56090|AT1G01160|AT1G13180|AT4G30340|AT3G48430|AT2G48120|AT2G02480|AT1G73590|AT5G20730|AT1G10670|AT5G24520|AT4G00100|AT5G22220|AT1G13260|AT1G17980|AT4G07410|AT2G30130|AT1G69780|AT3G16630|AT5G04470|AT1G48920|AT1G01510|AT5G56030|AT4G38630|AT4G01540…
48468	1.2585e-177	0	218	332	1950	30472	cell development	AT5G26720|AT4G21060|AT3G06010|AT3G08550|AT3G06810|AT2G22640|AT5G03280|AT1G76850|AT1G50460|AT2G24260|AT2G02470|AT4G14880|AT2G35610|AT1G56580|AT5G18410|AT3G56640|AT2G38440|AT4G11920|AT2G17720|AT1G48380|AT4G20780|AT4G24580|AT5G16910|AT5G44280|AT2G42260|AT1G13180|AT2G02480|AT5G47200|AT4G00100|AT1G08030|AT5G22220|AT1G72150|AT2G22540|AT3G16630|AT5G44610|AT1G03010|AT2G47000|AT1G01510|AT4G38630|AT5G24630…
48366	1.2948e-168	0	197	282	1950	30472	leaf development	AT5G46210|AT3G05040|AT2G22640|AT1G64520|AT1G56580|AT3G50660|AT1G55250|AT5G18410|AT3G54220|AT2G38440|AT4G29350|AT3G21640|AT4G20780|AT4G37650|AT2G42260|AT3G56090|AT1G01160|AT1G13180|AT4G30340|AT3G48430|AT2G48120|AT2G02480|AT1G73590|AT5G20730|AT1G10670|AT5G24520|AT4G00100|AT5G22220|AT1G13260|AT1G17980|AT4G07410|AT2G30130|AT1G69780|AT3G16630|AT5G04470|AT1G48920|AT1G01510|AT5G56030|AT4G38630|AT4G01540…
50793	4.5249e-168	0	256	509	1950	30472	regulation of developmental process	AT3G59900|AT1G44900|AT5G46210|AT5G17690|AT3G07220|AT3G06010|AT3G08550|AT3G05040|AT5G49160|AT3G06930|AT1G52880|AT1G27320|AT5G37055|AT3G16857|AT3G12810|AT5G14170|AT5G65080|AT3G49670|AT3G06020|AT5G66730|AT4G11920|AT2G38560|AT5G44160|AT1G30970|AT5G44280|AT2G40080|AT2G01830|AT1G53160|AT4G32880|AT2G26670|AT1G10670|AT3G50870|AT1G08030|AT1G13260|AT5G62165|AT2G22540|AT1G22770|AT2G20000|AT2G25930|AT5G44610…
34641	1.4889e-166	0	711	3957	1950	30472	cellular nitrogen compound metabolic process	AT3G11964|AT5G17690|AT1G68310|AT5G63110|AT2G15430|AT5G49160|AT1G03910|AT3G44880|AT2G24260|AT2G02470|AT1G75080|AT4G14880|AT5G13080|AT5G22800|AT4G01560|AT5G14170|AT1G32230|AT2G40400|AT3G54220|AT1G09570|AT3G19580|AT5G66730|AT5G65640|AT2G38560|AT2G14210|AT3G23940|AT3G52280|AT4G37650|AT4G37770|AT4G14510|AT1G69770|AT3G44750|AT1G54130|AT2G48120|AT1G53160|AT1G01720|AT2G02480|AT1G54490|AT5G20730|AT2G26670…
6807	4.5511e-166	0	725	4105	1950	30472	nitrogen compound metabolic process	AT3G11964|AT5G17690|AT1G68310|AT5G63110|AT2G15430|AT5G49160|AT1G03910|AT3G44880|AT2G24260|AT3G10870|AT2G02470|AT1G75080|AT4G14880|AT5G13080|AT5G22800|AT4G01560|AT5G14170|AT1G32230|AT2G40400|AT3G54220|AT1G09570|AT3G19580|AT5G66730|AT5G65640|AT2G17720|AT2G38560|AT2G14210|AT3G23940|AT3G52280|AT4G37650|AT4G37770|AT4G14510|AT1G69770|AT3G44750|AT1G54130|AT2G48120|AT1G53160|AT1G01720|AT2G02480|AT1G54490…
19222	3.3758e-165	0	625	3151	1950	30472	regulation of metabolic process	AT5G17690|AT1G09100|AT3G05040|AT2G30950|AT5G63110|AT5G49160|AT3G51060|AT2G39880|AT2G24260|AT5G37055|AT2G02470|AT1G75080|AT5G13080|AT5G14170|AT3G54220|AT1G09570|AT3G19580|AT5G66730|AT5G65640|AT2G38560|AT2G14210|AT3G52280|AT4G24580|AT4G37650|AT1G69770|AT3G44750|AT2G48120|AT1G53160|AT1G01720|AT1G54490|AT5G20730|AT4G38740|AT3G29035|AT4G25320|AT4G01550|AT1G09000|AT1G08030|AT5G17430|AT5G62165|AT5G63370…
44238	2.6809e-162	0	1207	10021	1950	30472	primary metabolic process	AT5G17690|AT4G21060|AT5G42890|AT2G30950|AT5G63110|AT2G15790|AT5G02190|AT1G03910|AT2G24260|AT2G27530|AT1G79560|AT2G02470|AT5G13080|AT5G22800|AT4G23250|AT5G14170|AT3G19580|AT2G17720|AT2G14210|AT3G21640|AT4G37650|AT4G14510|AT1G69770|AT3G44750|AT2G41850|AT1G78240|AT3G07360|AT2G04660|AT1G53160|AT1G01720|AT2G02480|AT1G54490|AT4G12570|AT4G38740|AT2G26670|AT3G55400|AT1G10670|AT4G00100|AT5G45940|AT1G09000…
10015	2.8831e-162	0	177	233	1950	30472	root morphogenesis	AT3G51460|AT1G44900|AT2G37620|AT4G21060|AT3G54610|AT3G06010|AT3G08550|AT5G49680|AT4G05530|AT3G06810|AT3G04630|AT5G03280|AT1G75120|AT5G05980|AT5G57740|AT1G52240|AT5G37850|AT1G50460|AT5G05620|AT2G24260|AT5G05500|AT1G78870|AT3G16857|AT2G02470|AT5G13080|AT5G52050|AT5G43900|AT3G06300|AT2G35610|AT1G32230|AT4G35910|AT1G04160|AT5G25460|AT2G17720|AT1G71696|AT1G48380|AT5G16910|AT1G02410|AT2G22475|AT1G69380…
31323	3.3265e-158	0	587	2897	1950	30472	regulation of cellular metabolic process	AT5G17690|AT1G09100|AT2G30950|AT5G63110|AT3G51060|AT2G39880|AT2G24260|AT5G37055|AT2G02470|AT1G75080|AT5G13080|AT5G14170|AT3G54220|AT1G09570|AT3G19580|AT5G66730|AT5G65640|AT2G38560|AT2G14210|AT3G52280|AT4G24580|AT4G37650|AT1G69770|AT3G44750|AT2G48120|AT1G53160|AT1G01720|AT1G54490|AT5G20730|AT4G38740|AT3G29035|AT4G25320|AT4G01550|AT1G09000|AT1G08030|AT5G17430|AT5G62165|AT5G63370|AT1G11760|AT1G69780…
9555	4.5849e-152	0	192	302	1950	30472	pollen development	AT2G39800|AT3G07980|AT1G09100|AT1G64110|AT3G23670|AT5G22000|AT5G18700|AT5G64560|AT3G57280|AT2G39880|AT4G29860|AT3G09090|AT5G54470|AT3G14270|AT2G01820|AT1G01690|AT1G77300|AT5G58270|AT3G11440|AT1G27600|AT2G03060|AT1G15110|AT2G34920|AT2G35690|AT5G65000|AT1G31660|AT5G54800|AT3G23940|AT3G26810|AT2G32460|AT5G12840|AT5G07370|AT5G09790|AT4G03190|AT1G53320|AT5G11110|AT3G53810|AT3G45040|AT3G11330|AT3G63290…
6139	8.1962e-152	0	634	3425	1950	30472	nucleobase, nucleoside, nucleotide and nucleic acid metabolic process	AT3G11964|AT5G17690|AT1G68310|AT5G63110|AT2G15430|AT5G49160|AT1G03910|AT2G24260|AT2G02470|AT1G75080|AT5G13080|AT5G22800|AT4G01560|AT5G14170|AT3G54220|AT1G09570|AT3G19580|AT5G66730|AT5G65640|AT2G38560|AT2G14210|AT3G52280|AT4G37650|AT4G14510|AT1G69770|AT3G44750|AT1G54130|AT2G48120|AT1G53160|AT1G01720|AT2G02480|AT1G54490|AT5G20730|AT3G29035|AT4G25320|AT3G55400|AT4G01550|AT5G45940|AT5G17310|AT5G17430…
90304	3.68e-151	0	600	3112	1950	30472	nucleic acid metabolic process	AT3G11964|AT5G17690|AT1G68310|AT5G63110|AT2G15430|AT5G49160|AT1G03910|AT2G24260|AT2G02470|AT1G75080|AT5G13080|AT5G22800|AT4G01560|AT5G14170|AT3G54220|AT1G09570|AT3G19580|AT5G66730|AT5G65640|AT2G38560|AT2G14210|AT3G52280|AT4G37650|AT4G14510|AT1G69770|AT3G44750|AT2G48120|AT1G53160|AT1G01720|AT2G02480|AT1G54490|AT5G20730|AT3G29035|AT4G25320|AT3G55400|AT4G01550|AT5G17430|AT3G09660|AT5G62165|AT5G63370…
60255	2.1148e-148	0	580	2965	1950	30472	regulation of macromolecule metabolic process	AT5G17690|AT1G09100|AT3G05040|AT5G63110|AT5G49160|AT3G51060|AT2G39880|AT2G24260|AT5G37055|AT2G02470|AT1G75080|AT5G13080|AT5G14170|AT3G54220|AT1G09570|AT3G19580|AT5G66730|AT5G65640|AT2G38560|AT2G14210|AT3G52280|AT4G37650|AT1G69770|AT3G44750|AT2G48120|AT1G53160|AT1G01720|AT1G54490|AT5G20730|AT4G38740|AT3G29035|AT4G25320|AT4G01550|AT1G08030|AT5G17430|AT5G62165|AT5G63370|AT1G11760|AT1G69780|AT1G22770…
50896	3.7378e-148	0	829	5539	1950	30472	response to stimulus	AT5G17690|AT3G06010|AT5G42890|AT2G30950|AT5G63110|AT3G53480|AT4G35460|AT5G03280|AT5G37055|AT2G02470|AT5G13080|AT2G25110|AT4G23250|AT5G14170|AT1G32230|AT3G19580|AT2G14210|AT3G21640|AT4G33050|AT5G53550|AT1G78240|AT3G07360|AT1G01720|AT1G54490|AT4G12570|AT4G38740|AT2G26670|AT1G10670|AT1G09000|AT5G18520|AT5G40010|AT1G80340|AT1G11760|AT1G69780|AT3G44540|AT1G80100|AT5G44610|AT4G29810|AT4G27630|AT1G59750…
80090	1.2523e-147	0	561	2802	1950	30472	regulation of primary metabolic process	AT5G17690|AT1G09100|AT5G63110|AT3G51060|AT2G39880|AT2G24260|AT5G37055|AT2G02470|AT1G75080|AT5G13080|AT5G14170|AT3G54220|AT1G09570|AT3G19580|AT5G66730|AT5G65640|AT2G38560|AT2G14210|AT3G52280|AT4G24580|AT4G37650|AT1G69770|AT3G44750|AT2G48120|AT1G53160|AT1G01720|AT1G54490|AT5G20730|AT4G38740|AT3G29035|AT4G25320|AT4G01550|AT1G08030|AT5G17430|AT5G62165|AT5G63370|AT1G11760|AT1G69780|AT1G22770|AT1G79580…
9889	3.0658e-144	0	543	2685	1950	30472	regulation of biosynthetic process	AT5G17690|AT1G09100|AT5G63110|AT3G51060|AT2G39880|AT2G24260|AT2G02470|AT1G75080|AT5G13080|AT5G14170|AT3G54220|AT1G09570|AT3G19580|AT5G66730|AT5G65640|AT2G38560|AT2G14210|AT3G52280|AT4G37650|AT1G69770|AT3G44750|AT2G48120|AT1G53160|AT1G01720|AT5G20730|AT3G29035|AT4G25320|AT4G01550|AT1G08030|AT5G17430|AT5G62165|AT5G63370|AT1G11760|AT1G69780|AT1G22770|AT1G79580|AT5G13180|AT4G01540|AT4G28840|AT1G12980…
31326	5.1325e-144	0	542	2679	1950	30472	regulation of cellular biosynthetic process	AT5G17690|AT1G09100|AT5G63110|AT3G51060|AT2G39880|AT2G24260|AT2G02470|AT1G75080|AT5G13080|AT5G14170|AT3G54220|AT1G09570|AT3G19580|AT5G66730|AT5G65640|AT2G38560|AT2G14210|AT3G52280|AT4G37650|AT1G69770|AT3G44750|AT2G48120|AT1G53160|AT1G01720|AT5G20730|AT3G29035|AT4G25320|AT4G01550|AT1G08030|AT5G17430|AT5G62165|AT5G63370|AT1G11760|AT1G69780|AT1G22770|AT1G79580|AT5G13180|AT4G01540|AT4G28840|AT1G12980…
8152	5.9775e-143	0	1304	11968	1950	30472	metabolic process	AT5G17690|AT4G21060|AT5G42890|AT2G30950|AT5G63110|AT2G15790|AT4G35460|AT5G02190|AT1G03910|AT2G24260|AT2G27530|AT1G79560|AT2G02470|AT5G13080|AT5G22800|AT2G25110|AT4G23250|AT5G14170|AT1G32230|AT3G19580|AT2G17720|AT2G14210|AT3G21640|AT4G37650|AT4G14510|AT1G69770|AT3G44750|AT2G41850|AT1G78240|AT3G07360|AT2G04660|AT1G53160|AT1G01720|AT2G02480|AT3G63290|AT1G54490|AT4G12570|AT4G38740|AT2G26670|AT3G55400…
51171	4.1446e-142	0	530	2597	1950	30472	regulation of nitrogen compound metabolic process	AT5G17690|AT1G09100|AT5G63110|AT3G51060|AT2G39880|AT2G24260|AT2G02470|AT1G75080|AT5G13080|AT5G14170|AT3G54220|AT1G09570|AT3G19580|AT5G66730|AT5G65640|AT2G38560|AT2G14210|AT3G52280|AT4G24580|AT4G37650|AT1G69770|AT3G44750|AT2G48120|AT1G53160|AT1G01720|AT1G54490|AT5G20730|AT3G29035|AT4G25320|AT4G01550|AT1G08030|AT5G17430|AT5G62165|AT1G11760|AT1G69780|AT1G22770|AT1G79580|AT5G13180|AT4G01540|AT4G28840…
16070	6.5511e-140	0	540	2716	1950	30472	RNA metabolic process	AT3G11964|AT5G17690|AT5G63110|AT2G15430|AT1G03910|AT2G24260|AT2G02470|AT1G75080|AT5G13080|AT5G22800|AT4G01560|AT5G14170|AT3G54220|AT1G09570|AT3G19580|AT5G66730|AT5G65640|AT2G38560|AT2G14210|AT3G52280|AT4G37650|AT4G14510|AT1G69770|AT3G44750|AT2G48120|AT1G53160|AT1G01720|AT1G54490|AT5G20730|AT3G29035|AT4G25320|AT3G55400|AT4G01550|AT5G17430|AT5G62165|AT5G63370|AT1G11760|AT1G69780|AT1G48920|AT1G79580…
19219	2.5273e-137	0	520	2571	1950	30472	regulation of nucleobase, nucleoside, nucleotide and nucleic acid metabolic process	AT5G17690|AT1G09100|AT5G63110|AT3G51060|AT2G39880|AT2G24260|AT2G02470|AT1G75080|AT5G13080|AT5G14170|AT3G54220|AT1G09570|AT3G19580|AT5G66730|AT5G65640|AT2G38560|AT2G14210|AT3G52280|AT4G24580|AT4G37650|AT1G69770|AT3G44750|AT2G48120|AT1G53160|AT1G01720|AT1G54490|AT5G20730|AT3G29035|AT4G25320|AT4G01550|AT5G17430|AT5G62165|AT1G11760|AT1G69780|AT1G22770|AT1G79580|AT5G13180|AT4G01540|AT4G28840|AT1G12980…
10468	1.5278e-136	0	549	2845	1950	30472	regulation of gene expression	AT5G17690|AT1G09100|AT3G05040|AT5G63110|AT5G49160|AT3G51060|AT2G39880|AT2G24260|AT2G02470|AT1G75080|AT5G13080|AT5G14170|AT3G54220|AT1G09570|AT3G19580|AT5G66730|AT5G65640|AT2G38560|AT2G14210|AT3G52280|AT4G37650|AT1G69770|AT3G44750|AT2G48120|AT1G53160|AT1G01720|AT1G54490|AT5G20730|AT3G29035|AT4G25320|AT4G01550|AT1G08030|AT5G17430|AT5G62165|AT1G11760|AT1G69780|AT1G22770|AT1G79580|AT5G13180|AT4G01540…
44260	2.3929e-136	0	945	7180	1950	30472	cellular macromolecule metabolic process	AT5G17690|AT4G21060|AT2G30950|AT5G63110|AT2G15790|AT1G03910|AT2G24260|AT2G27530|AT2G02470|AT5G13080|AT5G22800|AT2G25110|AT4G23250|AT5G14170|AT3G19580|AT2G17720|AT2G14210|AT3G21640|AT4G37650|AT4G14510|AT1G69770|AT3G44750|AT1G78240|AT3G07360|AT2G04660|AT1G53160|AT1G01720|AT2G02480|AT1G54490|AT4G12570|AT4G38740|AT3G55400|AT1G10670|AT4G00100|AT1G09000|AT5G17430|AT5G63370|AT1G11760|AT1G69780|AT1G79580…
5622	3.7368e-136	0	1771	20667	1950	30472	intracellular	AT5G42890|AT3G56990|AT2G30950|AT2G15790|AT4G35460|AT5G03280|AT1G03910|AT1G43130|AT2G24260|AT5G37055|AT1G79560|AT2G02470|AT5G13080|AT5G22800|AT2G25110|AT5G19620|AT3G19580|AT2G38440|AT4G37650|AT4G14510|AT1G69770|AT5G53550|AT1G78240|AT2G04660|AT1G01720|AT2G02480|AT1G77390|AT1G10670|AT5G45940|AT5G17430|AT5G27230|AT1G67120|AT5G63370|AT5G49070|AT1G69780|AT3G44540|AT3G43210|AT1G80100|AT5G44610|AT1G79580…
44424	3.9238e-136	0	1770	20645	1950	30472	intracellular part	AT5G42890|AT3G56990|AT2G30950|AT2G15790|AT4G35460|AT5G03280|AT1G03910|AT1G43130|AT2G24260|AT5G37055|AT1G79560|AT2G02470|AT5G13080|AT5G22800|AT2G25110|AT5G19620|AT3G19580|AT2G38440|AT4G37650|AT4G14510|AT1G69770|AT5G53550|AT1G78240|AT2G04660|AT1G01720|AT2G02480|AT1G77390|AT1G10670|AT5G45940|AT5G17430|AT5G27230|AT1G67120|AT5G63370|AT5G49070|AT1G69780|AT3G44540|AT3G43210|AT1G80100|AT5G44610|AT1G79580…
10556	2.6426e-135	0	523	2625	1950	30472	regulation of macromolecule biosynthetic process	AT5G17690|AT1G09100|AT5G63110|AT3G51060|AT2G39880|AT2G24260|AT2G02470|AT1G75080|AT5G13080|AT5G14170|AT3G54220|AT1G09570|AT3G19580|AT5G66730|AT5G65640|AT2G38560|AT2G14210|AT3G52280|AT4G37650|AT1G69770|AT3G44750|AT2G48120|AT1G53160|AT1G01720|AT5G20730|AT3G29035|AT4G25320|AT4G01550|AT5G17430|AT5G62165|AT5G63370|AT1G11760|AT1G69780|AT1G22770|AT1G79580|AT5G13180|AT4G01540|AT4G28840|AT1G12980|AT4G02990…
9058	3.422e-135	0	794	5403	1950	30472	biosynthetic process	AT5G17690|AT4G21060|AT5G63110|AT4G35460|AT2G24260|AT2G27530|AT2G02470|AT5G13080|AT5G22800|AT2G25110|AT5G14170|AT1G32230|AT3G19580|AT2G14210|AT4G37650|AT1G69770|AT3G44750|AT1G78240|AT1G53160|AT1G01720|AT2G02480|AT2G26670|AT3G55400|AT1G10670|AT4G00100|AT5G45940|AT1G80340|AT5G17430|AT1G11760|AT5G49070|AT1G69780|AT3G44540|AT1G79580|AT2G28880|AT4G26300|AT4G02990|AT1G59750|AT3G54320|AT1G12860|AT2G39990…
43226	6.1266e-135	0	1664	18441	1950	30472	organelle	AT5G42890|AT3G56990|AT2G30950|AT4G35460|AT5G03280|AT1G03910|AT1G43130|AT2G24260|AT5G37055|AT1G79560|AT2G02470|AT5G13080|AT5G22800|AT2G25110|AT5G19620|AT3G19580|AT2G38440|AT4G37650|AT4G14510|AT1G69770|AT1G78240|AT2G04660|AT1G01720|AT2G02480|AT1G77390|AT5G45940|AT5G17430|AT5G27230|AT1G67120|AT5G63370|AT5G49070|AT1G69780|AT3G44540|AT3G43210|AT1G80100|AT5G44610|AT1G79580|AT4G00330|AT4G02990|AT1G09230…
43229	2.3207e-134	0	1663	18440	1950	30472	intracellular organelle	AT5G42890|AT3G56990|AT2G30950|AT4G35460|AT5G03280|AT1G03910|AT1G43130|AT2G24260|AT5G37055|AT1G79560|AT2G02470|AT5G13080|AT5G22800|AT2G25110|AT5G19620|AT3G19580|AT2G38440|AT4G37650|AT4G14510|AT1G69770|AT1G78240|AT2G04660|AT1G01720|AT2G02480|AT1G77390|AT5G45940|AT5G17430|AT5G27230|AT1G67120|AT5G63370|AT5G49070|AT1G69780|AT3G44540|AT3G43210|AT1G80100|AT5G44610|AT1G79580|AT4G00330|AT4G02990|AT1G09230…
44464	3.0729e-132	0	1887	23762	1950	30472	cell part	AT5G42890|AT3G56990|AT2G30950|AT3G53480|AT2G15790|AT4G35460|AT5G03280|AT1G03910|AT1G43130|AT2G24260|AT5G37055|AT1G79560|AT2G02470|AT5G13080|AT5G22800|AT2G25110|AT5G19620|AT3G19580|AT2G38440|AT4G37650|AT4G14510|AT1G69770|AT5G53550|AT5G55730|AT1G78240|AT2G04660|AT1G01720|AT2G02480|AT3G63290|AT1G77390|AT1G10670|AT5G45940|AT5G17430|AT5G27230|AT1G67120|AT5G63370|AT5G49070|AT1G69780|AT3G44540|AT3G43210…
5623	4.4337e-132	0	1887	23767	1950	30472	cell	AT5G42890|AT3G56990|AT2G30950|AT3G53480|AT2G15790|AT4G35460|AT5G03280|AT1G03910|AT1G43130|AT2G24260|AT5G37055|AT1G79560|AT2G02470|AT5G13080|AT5G22800|AT2G25110|AT5G19620|AT3G19580|AT2G38440|AT4G37650|AT4G14510|AT1G69770|AT5G53550|AT5G55730|AT1G78240|AT2G04660|AT1G01720|AT2G02480|AT3G63290|AT1G77390|AT1G10670|AT5G45940|AT5G17430|AT5G27230|AT1G67120|AT5G63370|AT5G49070|AT1G69780|AT3G44540|AT3G43210…
51239	7.2022e-131	0	198	388	1950	30472	regulation of multicellular organismal process	AT1G44900|AT5G46210|AT5G17690|AT3G05040|AT5G49160|AT3G06930|AT1G52880|AT1G27320|AT5G37055|AT3G16857|AT3G12810|AT5G14170|AT5G65080|AT3G49670|AT3G06020|AT5G66730|AT2G38560|AT5G44160|AT1G30970|AT2G40080|AT2G01830|AT1G53160|AT2G26670|AT1G10670|AT3G50870|AT1G08030|AT1G13260|AT5G62165|AT2G22540|AT1G22770|AT2G25930|AT1G01510|AT5G56030|AT2G25010|AT4G38630|AT3G03450|AT1G08260|AT3G33520|AT4G00450|AT1G62360…
40007	6.4854e-130	0	206	427	1950	30472	growth	AT5G26720|AT5G17690|AT3G08550|AT5G49720|AT3G06810|AT3G29810|AT4G35460|AT1G27320|AT1G76850|AT2G24260|AT2G02470|AT4G14880|AT3G50660|AT3G56640|AT4G24580|AT5G16910|AT4G03190|AT4G27060|AT1G13180|AT3G48430|AT1G54490|AT5G47200|AT2G30490|AT1G55020|AT4G08500|AT4G07410|AT4G22970|AT1G72150|AT2G25930|AT5G44610|AT1G03010|AT2G47000|AT1G01510|AT4G38630|AT5G60410|AT5G05690|AT3G16640|AT5G10360|AT3G61650|AT5G09810…
45449	9.6845e-130	0	499	2485	1950	30472	regulation of transcription	AT5G17690|AT1G09100|AT5G63110|AT3G51060|AT2G39880|AT2G24260|AT2G02470|AT1G75080|AT5G13080|AT5G14170|AT3G54220|AT1G09570|AT3G19580|AT5G66730|AT5G65640|AT2G38560|AT2G14210|AT3G52280|AT4G37650|AT1G69770|AT3G44750|AT2G48120|AT1G53160|AT1G01720|AT5G20730|AT3G29035|AT4G25320|AT4G01550|AT5G17430|AT5G62165|AT1G11760|AT1G69780|AT1G22770|AT1G79580|AT5G13180|AT4G01540|AT4G28840|AT1G12980|AT4G02990|AT3G33520…
51252	7.4835e-129	0	499	2497	1950	30472	regulation of RNA metabolic process	AT5G17690|AT1G09100|AT5G63110|AT3G51060|AT2G39880|AT2G24260|AT2G02470|AT1G75080|AT5G13080|AT5G14170|AT3G54220|AT1G09570|AT3G19580|AT5G66730|AT5G65640|AT2G38560|AT2G14210|AT3G52280|AT4G37650|AT1G69770|AT3G44750|AT2G48120|AT1G53160|AT1G01720|AT1G54490|AT5G20730|AT4G25320|AT4G01550|AT5G17430|AT5G62165|AT1G11760|AT1G69780|AT1G22770|AT1G79580|AT5G13180|AT4G01540|AT4G28840|AT1G12980|AT4G02990|AT3G33520…
43170	8.3718e-129	0	972	7707	1950	30472	macromolecule metabolic process	AT5G17690|AT4G21060|AT2G30950|AT5G63110|AT2G15790|AT4G35460|AT5G02190|AT1G03910|AT2G24260|AT2G27530|AT1G79560|AT2G02470|AT5G13080|AT5G22800|AT2G25110|AT4G23250|AT5G14170|AT3G19580|AT2G17720|AT2G14210|AT3G21640|AT4G37650|AT4G14510|AT1G69770|AT3G44750|AT1G78240|AT3G07360|AT2G04660|AT1G53160|AT1G01720|AT2G02480|AT1G54490|AT4G12570|AT4G38740|AT3G55400|AT1G10670|AT4G00100|AT1G09000|AT5G17430|AT5G63370…
44249	1.7044e-128	0	769	5258	1950	30472	cellular biosynthetic process	AT5G17690|AT4G21060|AT5G63110|AT2G24260|AT2G27530|AT2G02470|AT5G13080|AT5G22800|AT2G25110|AT5G14170|AT1G32230|AT3G19580|AT2G14210|AT4G37650|AT1G69770|AT3G44750|AT1G78240|AT1G53160|AT1G01720|AT2G02480|AT2G26670|AT3G55400|AT1G10670|AT4G00100|AT5G45940|AT1G80340|AT5G17430|AT1G11760|AT5G49070|AT1G69780|AT3G44540|AT1G79580|AT2G28880|AT4G26300|AT4G02990|AT1G59750|AT3G54320|AT1G12860|AT2G39990|AT1G13950…
9887	3.2082e-128	0	163	258	1950	30472	organ morphogenesis	AT1G17920|AT3G49780|AT3G05040|AT2G22640|AT5G03280|AT1G19270|AT5G65930|AT5G03680|AT2G44950|AT1G74030|AT3G12810|AT5G43900|AT5G64390|AT2G31650|AT1G56580|AT3G50660|AT5G67420|AT1G55250|AT5G18410|AT5G50320|AT2G38440|AT5G53950|AT2G31090|AT1G30210|AT2G37630|AT4G20780|AT2G22475|AT2G42260|AT4G18710|AT2G46225|AT1G48410|AT5G39740|AT1G13180|AT2G48120|AT2G02480|AT1G73590|AT4G33210|AT4G00220|AT5G24520|AT4G00100…
6355	6.4863e-128	0	494	2465	1950	30472	regulation of transcription, DNA-dependent	AT5G17690|AT1G09100|AT5G63110|AT3G51060|AT2G39880|AT2G24260|AT2G02470|AT1G75080|AT5G13080|AT5G14170|AT3G54220|AT1G09570|AT3G19580|AT5G66730|AT5G65640|AT2G38560|AT2G14210|AT3G52280|AT4G37650|AT1G69770|AT3G44750|AT2G48120|AT1G53160|AT1G01720|AT5G20730|AT4G25320|AT4G01550|AT5G17430|AT5G62165|AT1G11760|AT1G69780|AT1G22770|AT1G79580|AT5G13180|AT4G01540|AT4G28840|AT1G12980|AT4G02990|AT3G33520|AT1G59750…
48507	8.4257e-126	0	135	174	1950	30472	meristem development	AT1G44900|AT3G06010|AT4G08920|AT3G08550|AT4G28650|AT3G05840|AT2G15790|AT3G20840|AT5G62940|AT3G15880|AT1G71040|AT1G46480|AT5G05980|AT3G16857|AT1G15750|AT1G20700|AT3G49670|AT3G06020|AT5G53950|AT4G11920|AT1G71696|AT5G44280|AT1G17930|AT1G69380|AT1G23010|AT5G61960|AT2G04025|AT4G17460|AT1G36160|AT4G32880|AT2G26670|AT4G20270|AT1G08030|AT4G24190|AT3G52770|AT4G08500|AT4G07410|AT5G10510|AT1G69270|AT2G22540…
10016	2.4368e-124	0	154	236	1950	30472	shoot morphogenesis	AT1G17920|AT2G26170|AT5G17690|AT3G05040|AT2G22640|AT3G15880|AT5G65930|AT3G63440|AT1G77300|AT1G75640|AT5G05620|AT2G44950|AT1G74030|AT1G63700|AT4G16780|AT5G43900|AT1G15750|AT1G20700|AT1G56580|AT3G50660|AT5G67420|AT1G55250|AT5G18410|AT2G38440|AT5G53950|AT1G30210|AT2G37630|AT4G20780|AT3G54180|AT2G22475|AT2G42260|AT4G18710|AT2G46225|AT1G48410|AT5G39740|AT1G13180|AT2G34925|AT2G48120|AT1G36160|AT2G02480…
42221	2.6604e-124	0	540	2941	1950	30472	response to chemical stimulus	AT3G59900|AT4G24210|AT1G09100|AT3G06010|AT5G42890|AT3G08550|AT2G30950|AT5G63110|AT3G53480|AT4G35460|AT5G03280|AT5G05340|AT1G79200|AT1G75080|AT4G14880|AT3G12810|AT1G32230|AT2G40400|AT1G09570|AT3G19580|AT2G38560|AT2G14210|AT3G21640|AT4G33050|AT1G78240|AT3G07360|AT1G54490|AT5G20730|AT4G12570|AT4G38740|AT3G29035|AT1G55020|AT1G09000|AT5G18520|AT5G40010|AT1G80340|AT5G17310|AT1G08030|AT3G54430|AT1G11760…
43227	1.0003e-123	0	1630	18148	1950	30472	membrane-bounded organelle	AT5G42890|AT3G56990|AT2G30950|AT4G35460|AT5G03280|AT1G03910|AT1G43130|AT2G24260|AT5G37055|AT1G79560|AT2G02470|AT5G13080|AT5G22800|AT2G25110|AT5G19620|AT3G19580|AT4G37650|AT4G14510|AT1G69770|AT1G78240|AT2G04660|AT1G01720|AT2G02480|AT1G77390|AT5G45940|AT5G17430|AT5G27230|AT1G67120|AT5G63370|AT5G49070|AT1G69780|AT3G44540|AT3G43210|AT1G80100|AT1G79580|AT4G00330|AT4G02990|AT1G09230|AT3G54320|AT5G56600…
43231	1.0003e-123	0	1630	18148	1950	30472	intracellular membrane-bounded organelle	AT5G42890|AT3G56990|AT2G30950|AT4G35460|AT5G03280|AT1G03910|AT1G43130|AT2G24260|AT5G37055|AT1G79560|AT2G02470|AT5G13080|AT5G22800|AT2G25110|AT5G19620|AT3G19580|AT4G37650|AT4G14510|AT1G69770|AT1G78240|AT2G04660|AT1G01720|AT2G02480|AT1G77390|AT5G45940|AT5G17430|AT5G27230|AT1G67120|AT5G63370|AT5G49070|AT1G69780|AT3G44540|AT3G43210|AT1G80100|AT1G79580|AT4G00330|AT4G02990|AT1G09230|AT3G54320|AT5G56600…
10033	1.005e-123	0	423	1907	1950	30472	response to organic substance	AT3G59900|AT4G24210|AT1G09100|AT5G42890|AT3G08550|AT2G30950|AT5G63110|AT3G53480|AT5G03280|AT1G79200|AT1G75080|AT1G32230|AT2G40400|AT3G19580|AT2G38560|AT3G21640|AT4G33050|AT1G78240|AT3G07360|AT1G54490|AT5G20730|AT4G12570|AT4G38740|AT1G55020|AT5G18520|AT5G40010|AT1G80340|AT1G08030|AT3G54430|AT1G69780|AT3G18130|AT1G80100|AT5G44610|AT2G47000|AT5G13180|AT4G38630|AT3G12830|AT4G01540|AT4G27630|AT1G12980…
8544	1.0916e-122	0	152	233	1950	30472	epidermis development	AT1G17920|AT3G51460|AT2G37620|AT4G21060|AT5G49680|AT4G05530|AT3G06810|AT2G22640|AT5G03280|AT1G75120|AT5G65930|AT5G05980|AT1G52240|AT5G37850|AT1G50460|AT5G05620|AT2G24260|AT5G05500|AT1G78870|AT1G74030|AT2G02470|AT5G13080|AT5G43900|AT3G06300|AT2G35610|AT1G56580|AT5G18410|AT1G04160|AT2G38440|AT2G17720|AT1G48380|AT4G20780|AT5G16910|AT2G22475|AT2G42260|AT5G56540|AT4G18710|AT2G46225|AT5G13010|AT1G13180…
9913	1.0916e-122	0	152	233	1950	30472	epidermal cell differentiation	AT1G17920|AT3G51460|AT2G37620|AT4G21060|AT5G49680|AT4G05530|AT3G06810|AT2G22640|AT5G03280|AT1G75120|AT5G65930|AT5G05980|AT1G52240|AT5G37850|AT1G50460|AT5G05620|AT2G24260|AT5G05500|AT1G78870|AT1G74030|AT2G02470|AT5G13080|AT5G43900|AT3G06300|AT2G35610|AT1G56580|AT5G18410|AT1G04160|AT2G38440|AT2G17720|AT1G48380|AT4G20780|AT5G16910|AT2G22475|AT2G42260|AT5G56540|AT4G18710|AT2G46225|AT5G13010|AT1G13180…
7398	1.0916e-122	0	152	233	1950	30472	ectoderm development	AT1G17920|AT3G51460|AT2G37620|AT4G21060|AT5G49680|AT4G05530|AT3G06810|AT2G22640|AT5G03280|AT1G75120|AT5G65930|AT5G05980|AT1G52240|AT5G37850|AT1G50460|AT5G05620|AT2G24260|AT5G05500|AT1G78870|AT1G74030|AT2G02470|AT5G13080|AT5G43900|AT3G06300|AT2G35610|AT1G56580|AT5G18410|AT1G04160|AT2G38440|AT2G17720|AT1G48380|AT4G20780|AT5G16910|AT2G22475|AT2G42260|AT5G56540|AT4G18710|AT2G46225|AT5G13010|AT1G13180…
32774	5.5869e-122	0	424	1936	1950	30472	RNA biosynthetic process	AT5G17690|AT5G63110|AT2G15430|AT2G24260|AT2G02470|AT1G75080|AT5G13080|AT5G14170|AT3G54220|AT1G09570|AT3G19580|AT5G66730|AT5G65640|AT2G38560|AT2G14210|AT3G52280|AT4G37650|AT1G69770|AT3G44750|AT2G48120|AT1G53160|AT1G01720|AT5G20730|AT3G29035|AT4G25320|AT4G01550|AT5G17430|AT5G62165|AT1G11760|AT1G69780|AT1G79580|AT5G13180|AT4G01540|AT1G12980|AT4G02990|AT1G59750|AT3G54320|AT2G41710|AT2G35270|AT1G14920…
6350	1.2864e-121	0	423	1932	1950	30472	transcription	AT5G17690|AT5G63110|AT2G15430|AT2G24260|AT2G02470|AT1G75080|AT5G13080|AT5G14170|AT3G54220|AT1G09570|AT3G19580|AT5G66730|AT5G65640|AT2G38560|AT2G14210|AT3G52280|AT4G37650|AT1G69770|AT3G44750|AT2G48120|AT1G53160|AT1G01720|AT5G20730|AT3G29035|AT4G25320|AT4G01550|AT5G17430|AT5G62165|AT1G11760|AT1G69780|AT1G79580|AT5G13180|AT4G01540|AT1G12980|AT4G02990|AT1G59750|AT3G54320|AT2G41710|AT2G35270|AT1G14920…
6351	1.2864e-121	0	423	1932	1950	30472	transcription, DNA-dependent	AT5G17690|AT5G63110|AT2G15430|AT2G24260|AT2G02470|AT1G75080|AT5G13080|AT5G14170|AT3G54220|AT1G09570|AT3G19580|AT5G66730|AT5G65640|AT2G38560|AT2G14210|AT3G52280|AT4G37650|AT1G69770|AT3G44750|AT2G48120|AT1G53160|AT1G01720|AT5G20730|AT3G29035|AT4G25320|AT4G01550|AT5G17430|AT5G62165|AT1G11760|AT1G69780|AT1G79580|AT5G13180|AT4G01540|AT1G12980|AT4G02990|AT1G59750|AT3G54320|AT2G41710|AT2G35270|AT1G14920…
9719	1.4743e-120	0	380	1596	1950	30472	response to endogenous stimulus	AT3G59900|AT4G24210|AT5G46210|AT3G03660|AT1G64990|AT5G42890|AT3G08550|AT5G49720|AT2G30950|AT5G63110|AT3G53480|AT1G48270|AT1G75520|AT5G03280|AT1G27320|AT1G79200|AT3G16857|AT3G48680|AT1G75080|AT1G64520|AT3G50660|AT1G32230|AT2G40400|AT3G19580|AT2G38560|AT3G21640|AT2G32460|AT2G01830|AT2G21660|AT5G61600|AT4G03190|AT2G01950|AT1G78240|AT3G07360|AT3G48430|AT1G04550|AT1G36160|AT1G54490|AT1G73590|AT5G20730…
9725	6.3447e-120	0	366	1494	1950	30472	response to hormone stimulus	AT3G59900|AT4G24210|AT5G46210|AT3G03660|AT1G64990|AT5G42890|AT3G08550|AT5G49720|AT2G30950|AT5G63110|AT3G53480|AT1G48270|AT1G75520|AT5G03280|AT1G27320|AT1G79200|AT3G16857|AT3G48680|AT1G75080|AT1G64520|AT3G50660|AT1G32230|AT2G40400|AT3G19580|AT2G38560|AT3G21640|AT2G32460|AT2G01830|AT2G21660|AT5G61600|AT4G03190|AT2G01950|AT1G78240|AT3G07360|AT3G48430|AT1G04550|AT1G36160|AT1G54490|AT1G73590|AT5G20730…
9628	1.5909e-119	0	399	1759	1950	30472	response to abiotic stimulus	AT1G10570|AT5G17690|AT3G06010|AT3G08550|AT2G30950|AT5G63110|AT5G03280|AT1G69640|AT5G14170|AT1G32230|AT3G54220|AT1G09570|AT3G19580|AT3G23940|AT2G48120|AT1G54490|AT5G20730|AT4G38740|AT2G26670|AT1G10670|AT5G40010|AT1G80340|AT5G17310|AT1G11760|AT1G22770|AT3G44540|AT5G44610|AT2G47000|AT5G13180|AT4G38630|AT4G29810|AT3G33520|AT4G00450|AT3G54560|AT1G14920|AT1G12860|AT5G05690|AT5G06780|AT5G45710|AT5G09810…
32989	3.5162e-118	0	187	386	1950	30472	cellular component morphogenesis	AT1G17920|AT3G51460|AT5G26720|AT4G05410|AT3G08550|AT5G49720|AT5G49680|AT5G48230|AT3G57280|AT3G09090|AT2G22640|AT1G20090|AT5G65930|AT1G76850|AT5G05620|AT5G05500|AT1G74030|AT4G14880|AT4G16780|AT1G27600|AT5G43900|AT1G56580|AT3G50660|AT5G18410|AT3G56640|AT2G38440|AT5G65000|AT5G35700|AT1G48380|AT4G20780|AT4G24580|AT3G54180|AT2G42260|AT5G07370|AT2G46225|AT5G11110|AT4G27060|AT1G13180|AT3G48430|AT2G41210…
8361	2.7402e-117	0	188	394	1950	30472	regulation of cell size	AT3G51460|AT5G26720|AT2G37620|AT5G17690|AT3G08550|AT5G49720|AT5G49680|AT5G48230|AT4G05530|AT3G06810|AT3G29810|AT4G35460|AT1G69490|AT1G20090|AT5G05980|AT1G76850|AT5G05620|AT2G24260|AT5G05500|AT2G44950|AT2G02470|AT4G14880|AT4G16780|AT5G43900|AT3G50660|AT3G56640|AT1G04160|AT4G11920|AT5G47390|AT5G63980|AT5G35700|AT4G24580|AT5G16910|AT3G54180|AT5G56540|AT4G18710|AT5G07370|AT4G27060|AT5G13010|AT1G13180…
32535	9.3961e-117	0	191	410	1950	30472	regulation of cellular component size	AT3G51460|AT5G26720|AT2G37620|AT5G17690|AT3G08550|AT5G49720|AT5G49680|AT5G48230|AT4G05530|AT3G06810|AT3G29810|AT4G35460|AT1G69490|AT1G20090|AT5G05980|AT1G76850|AT5G05620|AT2G24260|AT5G05500|AT2G44950|AT2G02470|AT4G14880|AT4G16780|AT5G43900|AT3G50660|AT3G56640|AT1G04160|AT4G11920|AT5G47390|AT5G63980|AT4G29350|AT5G35700|AT4G24580|AT5G16910|AT3G54180|AT5G56540|AT4G18710|AT5G07370|AT4G27060|AT5G13010…
90066	9.3961e-117	0	191	410	1950	30472	regulation of anatomical structure size	AT3G51460|AT5G26720|AT2G37620|AT5G17690|AT3G08550|AT5G49720|AT5G49680|AT5G48230|AT4G05530|AT3G06810|AT3G29810|AT4G35460|AT1G69490|AT1G20090|AT5G05980|AT1G76850|AT5G05620|AT2G24260|AT5G05500|AT2G44950|AT2G02470|AT4G14880|AT4G16780|AT5G43900|AT3G50660|AT3G56640|AT1G04160|AT4G11920|AT5G47390|AT5G63980|AT4G29350|AT5G35700|AT4G24580|AT5G16910|AT3G54180|AT5G56540|AT4G18710|AT5G07370|AT4G27060|AT5G13010…
10228	1.8047e-113	0	117	144	1950	30472	vegetative to reproductive phase transition of meristem	AT2G35720|AT5G46210|AT1G10570|AT5G17690|AT3G49660|AT1G64990|AT4G15180|AT5G63110|AT1G12910|AT3G06930|AT5G63510|AT2G44950|AT3G48680|AT2G39810|AT1G55250|AT5G63980|AT4G10710|AT5G44160|AT2G44680|AT2G40080|AT1G76500|AT2G21660|AT3G44110|AT1G28420|AT1G01040|AT1G51140|AT3G12140|AT3G10480|AT3G12145|AT2G02760|AT3G48430|AT5G42820|AT2G46340|AT2G32950|AT2G46830|AT3G10490|AT3G16470|AT1G31814|AT2G25930|AT4G12680…
5634	2.275e-112	0	1099	9874	1950	30472	nucleus	AT5G17690|AT3G06010|AT3G56990|AT5G63110|AT3G51060|AT5G03280|AT1G19270|AT1G03910|AT2G24260|AT5G37055|AT2G02470|AT5G13080|AT5G14170|AT5G40480|AT1G32230|AT3G06020|AT3G19580|AT2G14210|AT4G26760|AT4G37650|AT4G33050|AT4G37890|AT1G69770|AT3G44750|AT3G07360|AT2G04660|AT1G53160|AT1G01720|AT2G02480|AT1G77390|AT1G54490|AT1G01960|AT4G12570|AT4G00100|AT5G17430|AT5G27230|AT1G67120|AT5G63370|AT1G11760|AT1G69780…
65008	8.7441e-111	0	315	1202	1950	30472	regulation of biological quality	AT5G26720|AT5G17690|AT5G23570|AT3G08550|AT5G49720|AT3G53480|AT3G06810|AT3G57280|AT3G29810|AT3G51060|AT4G35460|AT1G75520|AT5G03280|AT2G45400|AT1G76850|AT1G50460|AT2G24260|AT3G10870|AT3G05290|AT2G02470|AT4G14880|AT2G25110|AT3G50660|AT3G54220|AT3G56640|AT4G11920|AT4G29350|AT4G24580|AT5G16910|AT4G37650|AT2G01830|AT3G56090|AT5G53550|AT1G01040|AT4G27060|AT1G13180|AT3G48430|AT4G16370|AT1G54490|AT1G73590…
48437	1.0004e-110	0	138	213	1950	30472	floral organ development	AT1G17920|AT3G07220|AT5G21150|AT4G24972|AT4G15180|AT3G56350|AT3G51060|AT4G29860|AT1G19270|AT1G52880|AT5G64960|AT1G77300|AT5G03680|AT5G50670|AT1G75080|AT3G12810|AT5G64390|AT5G62090|AT2G31650|AT3G49670|AT3G58780|AT3G26810|AT3G61150|AT4G03190|AT1G51660|AT2G41850|AT5G58560|AT1G64405|AT4G20270|AT3G55400|AT3G28860|AT2G36910|AT1G17980|AT5G23150|AT3G60830|AT2G44010|AT3G15540|AT5G05560|AT5G50570|AT1G01510…
7389	5.1103e-110	0	130	188	1950	30472	pattern specification process	AT3G05040|AT1G68310|AT2G15430|AT1G19300|AT3G51060|AT3G20840|AT1G43130|AT5G03680|AT2G01420|AT2G27530|AT4G24220|AT5G64390|AT1G15750|AT2G31650|AT3G54220|AT5G50320|AT5G53950|AT2G31090|AT5G16750|AT2G37630|AT4G37650|AT2G01950|AT3G44750|AT1G01040|AT1G48410|AT5G13010|AT1G04550|AT1G73590|AT4G00220|AT4G25320|AT1G80180|AT3G28860|AT3G52770|AT4G07410|AT1G31770|AT5G10510|AT1G69270|AT2G20120|AT1G68060|AT3G15380…
48519	1.8682e-109	0	246	748	1950	30472	negative regulation of biological process	AT5G46210|AT5G17690|AT5G21150|AT3G06010|AT5G23570|AT3G08550|AT3G05040|AT2G30950|AT5G63110|AT5G49160|AT1G48270|AT3G51060|AT5G03280|AT1G19270|AT1G27320|AT1G75080|AT3G12810|AT5G13080|AT1G70070|AT2G30280|AT5G65080|AT5G23320|AT1G09570|AT3G19580|AT4G11920|AT2G38560|AT4G29350|AT1G30970|AT4G24580|AT5G44280|AT4G37650|AT2G42260|AT1G69770|AT4G03190|AT1G01040|AT3G48430|AT1G04550|AT1G01720|AT1G61140|AT1G08030…
16049	2.9677e-104	0	170	363	1950	30472	cell growth	AT3G51460|AT5G26720|AT2G37620|AT5G17690|AT3G08550|AT5G49720|AT5G49680|AT5G48230|AT4G05530|AT3G06810|AT3G29810|AT4G35460|AT1G69490|AT1G20090|AT5G05980|AT1G76850|AT5G05620|AT2G24260|AT5G05500|AT2G44950|AT2G02470|AT4G14880|AT4G16780|AT5G43900|AT3G50660|AT3G56640|AT1G04160|AT5G35700|AT4G24580|AT5G16910|AT3G54180|AT5G56540|AT4G18710|AT5G07370|AT4G27060|AT5G13010|AT1G13180|AT3G48430|AT2G41210|AT4G30980…
902	1.6125e-103	0	165	343	1950	30472	cell morphogenesis	AT1G17920|AT3G51460|AT5G26720|AT3G08550|AT5G49720|AT5G49680|AT5G48230|AT2G22640|AT1G20090|AT5G65930|AT1G76850|AT5G05620|AT5G05500|AT1G74030|AT4G14880|AT4G16780|AT5G43900|AT1G56580|AT3G50660|AT5G18410|AT3G56640|AT2G38440|AT5G35700|AT1G48380|AT4G20780|AT4G24580|AT3G54180|AT2G42260|AT5G07370|AT2G46225|AT4G27060|AT1G13180|AT3G48430|AT2G41210|AT3G13870|AT2G02480|AT2G43750|AT1G54490|AT1G04950|AT5G47200…
9059	4.8676e-100	2.21e-98	577	3738	1950	30472	macromolecule biosynthetic process	AT5G17690|AT4G21060|AT3G08550|AT5G63110|AT2G15430|AT4G35460|AT2G24260|AT2G27530|AT3G05290|AT2G02470|AT1G75080|AT5G13080|AT5G22800|AT2G25110|AT5G14170|AT3G54220|AT1G09570|AT3G19580|AT5G66730|AT5G65640|AT2G38560|AT2G14210|AT3G52280|AT4G37650|AT1G69770|AT3G20440|AT3G44750|AT1G78240|AT2G48120|AT1G53160|AT1G01720|AT2G02480|AT5G20730|AT3G29035|AT4G25320|AT3G55400|AT1G10670|AT4G00100|AT4G01550|AT1G08030…
48589	1.7437e-99	7.81e-98	156	318	1950	30472	developmental growth	AT3G51460|AT5G26720|AT2G37620|AT3G08550|AT5G49720|AT5G49680|AT5G48230|AT4G05530|AT3G06810|AT3G20840|AT1G20090|AT5G05980|AT1G76850|AT5G05620|AT2G24260|AT5G05500|AT2G02470|AT4G14880|AT4G16780|AT5G43900|AT3G50660|AT3G56640|AT1G04160|AT5G35700|AT4G24580|AT5G16910|AT3G54180|AT5G56540|AT5G07370|AT4G03190|AT5G01270|AT4G27060|AT5G13010|AT3G48430|AT2G41210|AT4G30980|AT3G13870|AT2G43750|AT1G54490|AT1G04950…
34645	1.7546e-99	7.81e-98	575	3728	1950	30472	cellular macromolecule biosynthetic process	AT5G17690|AT4G21060|AT3G08550|AT5G63110|AT2G15430|AT2G24260|AT2G27530|AT3G05290|AT2G02470|AT1G75080|AT5G13080|AT5G22800|AT2G25110|AT5G14170|AT3G54220|AT1G09570|AT3G19580|AT5G66730|AT5G65640|AT2G38560|AT2G14210|AT3G52280|AT4G37650|AT1G69770|AT3G20440|AT3G44750|AT1G78240|AT2G48120|AT1G53160|AT1G01720|AT2G02480|AT5G20730|AT3G29035|AT4G25320|AT3G55400|AT1G10670|AT4G00100|AT4G01550|AT1G08030|AT5G17430…
48438	6.3408e-97	2.7942e-95	118	177	1950	30472	floral whorl development	AT3G07220|AT5G21150|AT4G24972|AT4G15180|AT3G51060|AT4G29860|AT1G75520|AT1G19270|AT1G52880|AT5G64960|AT1G77300|AT5G03680|AT5G50670|AT1G79200|AT1G75080|AT3G12810|AT5G43900|AT5G62090|AT3G49670|AT3G58780|AT4G26000|AT3G26810|AT4G03190|AT2G41850|AT4G17460|AT5G58560|AT3G55400|AT3G28860|AT2G36910|AT1G17980|AT3G15540|AT2G22540|AT5G05560|AT5G50570|AT4G38630|AT1G11130|AT3G02000|AT1G15330|AT1G62360|AT5G52520…
9553	1.0954e-96	4.7815e-95	108	146	1950	30472	embryo sac development	AT3G11964|AT1G09100|AT5G21150|AT4G05410|AT3G56990|AT5G22000|AT1G24450|AT1G01690|AT1G16280|AT2G18390|AT2G20585|AT1G77300|AT5G05620|AT4G15570|AT5G42020|AT2G34920|AT1G31660|AT5G54800|AT3G23940|AT4G33050|AT2G42260|AT4G37890|AT2G04660|AT1G01960|AT2G35940|AT3G06430|AT1G15440|AT1G61140|AT1G14350|AT1G55420|AT1G67120|AT1G19520|AT5G57880|AT2G02810|AT1G31817|AT5G35770|AT3G43210|AT5G05560|AT2G41420|AT4G13890…
8150	1.1596e-96	5.0143e-95	1950	27314	1950	30472	biological_process	AT5G42890|AT3G56990|AT2G30950|AT3G53480|AT2G15790|AT4G35460|AT5G03280|AT1G03910|AT1G43130|AT2G24260|AT5G37055|AT1G79560|AT2G02470|AT5G13080|AT5G22800|AT2G25110|AT5G19620|AT3G19580|AT2G38440|AT4G37650|AT4G14510|AT1G69770|AT5G53550|AT5G55730|AT2G34090|AT1G78240|AT2G04660|AT1G01720|AT2G02480|AT3G63290|AT1G77390|AT1G10670|AT5G45940|AT5G17430|AT5G27230|AT1G67120|AT5G63370|AT5G49070|AT1G69780|AT3G44540…
6996	3.7968e-93	1.6266e-91	283	1137	1950	30472	organelle organization	AT5G17690|AT3G06010|AT5G49720|AT2G30950|AT5G63110|AT5G49160|AT3G06930|AT2G22640|AT2G18390|AT2G20585|AT1G75640|AT5G37055|AT2G02470|AT3G12810|AT4G31780|AT4G01560|AT5G14170|AT1G55250|AT5G19620|AT5G18410|AT2G38440|AT4G11920|AT4G29350|AT3G52280|AT5G44280|AT4G26760|AT4G33050|AT2G42260|AT1G74560|AT5G58440|AT4G37890|AT1G69770|AT3G44750|AT1G13180|AT3G48430|AT2G48120|AT2G04660|AT2G35940|AT1G15440|AT3G27530…
51716	1.4525e-92	6.1656e-91	370	1853	1950	30472	cellular response to stimulus	AT3G59900|AT4G24210|AT5G46210|AT3G03660|AT1G09100|AT5G23570|AT3G08550|AT3G53480|AT1G48270|AT4G35460|AT1G75520|AT5G03280|AT1G71040|AT1G27320|AT5G05340|AT1G79200|AT3G16857|AT2G02470|AT1G75080|AT5G13080|AT1G64520|AT5G14170|AT3G50660|AT5G21140|AT1G32230|AT1G09570|AT3G19580|AT4G10710|AT2G14210|AT3G21640|AT2G32460|AT3G12380|AT2G40080|AT2G01830|AT5G61600|AT4G03190|AT2G01950|AT1G01040|AT1G51660|AT3G07360…
9886	2.5495e-91	1.0724e-89	105	147	1950	30472	post-embryonic morphogenesis	AT4G29900|AT5G61730|AT1G19270|AT1G52880|AT3G63440|AT5G57740|AT5G03680|AT1G75640|AT5G05620|AT1G63700|AT3G12810|AT5G64390|AT2G31650|AT1G32230|AT4G35910|AT2G31090|AT3G54180|AT1G02410|AT1G74560|AT1G01040|AT1G73590|AT5G20730|AT3G23290|AT2G04160|AT1G55020|AT1G14350|AT1G17980|AT4G07410|AT3G22400|AT3G53180|AT1G69780|AT5G54650|AT5G65710|AT5G03540|AT1G01510|AT4G38630|AT3G02000|AT1G15570|AT3G12280|AT4G12550…
9965	5.343e-89	2.2272e-87	112	175	1950	30472	leaf morphogenesis	AT1G17920|AT3G05040|AT2G22640|AT5G65930|AT2G44950|AT1G74030|AT5G43900|AT1G56580|AT3G50660|AT5G67420|AT1G55250|AT5G18410|AT2G38440|AT1G30210|AT2G37630|AT4G20780|AT2G22475|AT2G42260|AT4G18710|AT2G46225|AT1G48410|AT5G39740|AT1G13180|AT2G48120|AT2G02480|AT1G73590|AT5G24520|AT4G00100|AT4G01710|AT4G18390|AT5G22220|AT4G32810|AT3G52770|AT2G30130|AT1G69780|AT3G16630|AT5G04470|AT1G01510|AT4G01540|AT5G24630…
3002	1.7784e-88	7.3469e-87	106	156	1950	30472	regionalization	AT3G05040|AT1G68310|AT2G15430|AT1G19300|AT3G51060|AT1G43130|AT2G27530|AT4G24220|AT5G64390|AT1G15750|AT2G31650|AT3G54220|AT5G53950|AT2G31090|AT2G37630|AT4G37650|AT2G01950|AT3G44750|AT1G48410|AT5G13010|AT1G04550|AT1G73590|AT4G00220|AT4G25320|AT1G80180|AT3G28860|AT3G52770|AT4G07410|AT1G31770|AT5G10510|AT1G69270|AT2G20120|AT1G68060|AT3G15380|AT3G63300|AT2G33800|AT1G48920|AT1G79580|AT2G21050|AT4G29810…
3677	1.9889e-88	8.144e-87	450	2662	1950	30472	DNA binding	AT5G17690|AT3G06010|AT2G15430|AT5G56930|AT5G49160|AT3G51060|AT2G39880|AT2G24260|AT2G02470|AT1G75080|AT3G12810|AT5G13080|AT3G54220|AT3G19580|AT5G66730|AT5G65640|AT2G38560|AT2G14210|AT3G52280|AT4G37650|AT1G69770|AT1G53160|AT1G01720|AT2G02480|AT5G20730|AT3G29035|AT4G25320|AT4G01550|AT5G17430|AT3G54430|AT3G09660|AT5G62165|AT1G69780|AT1G48920|AT1G79580|AT5G13180|AT4G01540|AT1G08260|AT1G12980|AT4G02990…
48528	2.3807e-88	9.6627e-87	91	112	1950	30472	post-embryonic root development	AT1G10370|AT3G54010|AT1G56010|AT3G60650|AT3G59420|AT1G08090|AT3G22942|AT1G49430|AT1G25220|AT4G13510|AT5G57740|AT1G77740|AT3G07390|AT5G42810|AT3G05090|AT5G13080|AT1G64520|AT3G50060|AT1G68765|AT1G32230|AT4G35910|AT3G02260|AT2G38120|AT2G14210|AT4G29350|AT5G43070|AT2G34680|AT4G26760|AT1G02410|AT4G34460|AT1G74560|AT1G47200|AT4G29040|AT3G19770|AT5G51451|AT3G07360|AT5G20730|AT2G22670|AT4G14550|AT5G56580…
904	2.6285e-87	1.0576e-85	115	190	1950	30472	cell morphogenesis involved in differentiation	AT1G17920|AT5G26720|AT5G49680|AT5G48230|AT2G22640|AT1G20090|AT5G65930|AT1G76850|AT1G74030|AT4G14880|AT5G43900|AT1G56580|AT5G18410|AT3G56640|AT2G38440|AT5G35700|AT4G20780|AT4G24580|AT2G42260|AT5G07370|AT2G46225|AT1G13180|AT2G41210|AT2G02480|AT2G43750|AT1G04950|AT5G47200|AT4G00100|AT3G08970|AT4G01710|AT5G22220|AT1G09080|AT1G72150|AT3G16630|AT1G79500|AT4G17615|AT1G03010|AT1G01510|AT5G17020|AT5G24630…
71310	3.5707e-87	1.4243e-85	244	910	1950	30472	cellular response to organic substance	AT3G59900|AT4G24210|AT5G46210|AT3G03660|AT1G09100|AT5G23570|AT3G08550|AT3G53480|AT1G48270|AT1G75520|AT5G03280|AT1G27320|AT1G79200|AT3G16857|AT1G75080|AT1G64520|AT3G50660|AT1G32230|AT3G19580|AT3G21640|AT2G32460|AT2G01830|AT5G61600|AT2G01950|AT1G01040|AT3G07360|AT1G04550|AT1G54490|AT1G73590|AT5G20730|AT4G38740|AT1G80340|AT3G28860|AT1G13260|AT3G54430|AT2G36910|AT3G15540|AT2G02810|AT3G18130|AT1G80100…
71495	1.0499e-86	4.152e-85	224	776	1950	30472	cellular response to endogenous stimulus	AT3G59900|AT4G24210|AT5G46210|AT3G03660|AT3G08550|AT3G53480|AT1G48270|AT1G75520|AT5G03280|AT1G27320|AT1G79200|AT3G16857|AT1G75080|AT1G64520|AT3G50660|AT1G32230|AT3G19580|AT3G21640|AT2G32460|AT2G01830|AT5G61600|AT2G01950|AT3G07360|AT1G04550|AT1G54490|AT1G73590|AT5G20730|AT4G38740|AT1G80340|AT3G28860|AT1G13260|AT3G54430|AT2G36910|AT3G15540|AT3G18130|AT1G80100|AT2G47000|AT3G12830|AT4G01540|AT3G03450…
10467	1.012e-85	3.9683e-84	569	3956	1950	30472	gene expression	AT3G11964|AT5G17690|AT5G63110|AT2G15430|AT1G03910|AT2G24260|AT2G27530|AT3G05290|AT2G02470|AT1G75080|AT5G13080|AT5G22800|AT4G01560|AT5G14170|AT3G54220|AT1G09570|AT3G19580|AT5G66730|AT5G65640|AT2G38560|AT2G14210|AT3G52280|AT4G37650|AT4G14510|AT1G69770|AT3G44750|AT2G48120|AT1G53160|AT1G01720|AT1G54490|AT5G20730|AT3G29035|AT4G25320|AT3G55400|AT4G00100|AT4G01550|AT5G17430|AT5G62165|AT5G63370|AT1G11760…
48527	1.7973e-84	6.9882e-83	83	97	1950	30472	lateral root development	AT1G10370|AT3G54010|AT1G56010|AT3G60650|AT3G59420|AT1G08090|AT3G22942|AT1G49430|AT1G25220|AT4G13510|AT5G57740|AT1G77740|AT3G07390|AT5G42810|AT3G05090|AT5G13080|AT3G50060|AT1G68765|AT1G32230|AT4G35910|AT3G02260|AT2G38120|AT2G14210|AT4G29350|AT5G43070|AT2G34680|AT4G34460|AT1G74560|AT1G47200|AT4G29040|AT5G51451|AT3G07360|AT5G20730|AT2G22670|AT4G14550|AT5G56580|AT4G33495|AT2G04160|AT1G13980|AT5G18560…
32870	4.1937e-84	1.617e-82	215	737	1950	30472	cellular response to hormone stimulus	AT3G59900|AT4G24210|AT5G46210|AT3G03660|AT3G08550|AT3G53480|AT1G48270|AT1G75520|AT5G03280|AT1G27320|AT1G79200|AT3G16857|AT1G75080|AT1G64520|AT1G32230|AT3G19580|AT3G21640|AT2G32460|AT2G01830|AT5G61600|AT2G01950|AT3G07360|AT1G04550|AT1G54490|AT1G73590|AT5G20730|AT4G38740|AT1G80340|AT3G28860|AT1G13260|AT3G54430|AT2G36910|AT3G15540|AT3G18130|AT1G80100|AT2G47000|AT3G12830|AT4G01540|AT3G03450|AT1G12980…
44422	1.1873e-83	4.5402e-82	644	4854	1950	30472	organelle part	AT3G11964|AT1G10570|AT5G17690|AT4G21060|AT1G09100|AT3G56990|AT3G08550|AT3G05040|AT2G30950|AT5G63110|AT2G15430|AT4G35460|AT5G03280|AT1G03910|AT1G69640|AT1G43130|AT3G44880|AT2G27530|AT5G37055|AT1G79560|AT3G05290|AT4G14880|AT3G12810|AT5G22800|AT4G01560|AT5G40480|AT5G19620|AT1G32230|AT2G40400|AT1G09570|AT2G17720|AT3G21640|AT3G23940|AT4G26760|AT3G20440|AT3G44750|AT1G78240|AT2G04660|AT2G02480|AT1G01960…
44446	4.285e-83	1.6252e-81	642	4845	1950	30472	intracellular organelle part	AT3G11964|AT1G10570|AT5G17690|AT4G21060|AT1G09100|AT3G56990|AT3G08550|AT3G05040|AT2G30950|AT5G63110|AT2G15430|AT4G35460|AT5G03280|AT1G03910|AT1G69640|AT1G43130|AT3G44880|AT2G27530|AT5G37055|AT1G79560|AT3G05290|AT4G14880|AT3G12810|AT5G22800|AT4G01560|AT5G40480|AT5G19620|AT1G32230|AT2G40400|AT1G09570|AT2G17720|AT3G21640|AT3G23940|AT4G26760|AT3G20440|AT3G44750|AT1G78240|AT2G04660|AT2G02480|AT1G01960…
48588	4.4158e-83	1.6611e-81	105	165	1950	30472	developmental cell growth	AT3G51460|AT5G26720|AT2G37620|AT5G49680|AT5G48230|AT4G05530|AT3G06810|AT1G20090|AT5G05980|AT1G76850|AT5G05620|AT2G24260|AT5G05500|AT2G02470|AT4G14880|AT5G43900|AT3G56640|AT1G04160|AT5G35700|AT4G24580|AT5G16910|AT5G56540|AT5G07370|AT5G13010|AT2G41210|AT4G30980|AT2G43750|AT1G04950|AT5G47200|AT3G08970|AT5G45420|AT1G09080|AT1G72150|AT1G79500|AT4G17615|AT5G44610|AT1G03010|AT2G47000|AT4G38630|AT5G17020…
48580	4.8659e-83	1.8157e-81	129	260	1950	30472	regulation of post-embryonic development	AT5G46210|AT5G17690|AT3G54610|AT3G05040|AT4G31820|AT5G49160|AT3G06930|AT2G18790|AT1G25540|AT1G27320|AT1G77300|AT5G03680|AT5G37055|AT5G13480|AT3G16857|AT1G07430|AT3G12810|AT5G14170|AT5G65080|AT2G31650|AT5G66730|AT2G38560|AT1G30970|AT4G26000|AT2G40080|AT2G01830|AT3G44110|AT3G47620|AT1G79730|AT1G53160|AT2G46340|AT1G10670|AT3G50870|AT1G13260|AT5G62165|AT5G23150|AT5G10510|AT1G68050|AT2G22540|AT1G22770…
30528	9.3138e-83	3.4476e-81	344	1763	1950	30472	transcription regulator activity	AT3G03660|AT3G51060|AT2G39880|AT5G62940|AT1G52880|AT2G24260|AT3G16857|AT1G75080|AT5G13080|AT2G30280|AT5G65080|AT1G20700|AT3G54220|AT3G19580|AT5G66730|AT4G29230|AT5G65640|AT2G38560|AT2G14210|AT5G44160|AT1G30970|AT2G32460|AT4G37650|AT5G61600|AT1G28420|AT1G01160|AT4G23810|AT4G17460|AT3G48430|AT1G04550|AT1G53160|AT1G01720|AT5G20730|AT4G32880|AT3G29035|AT2G35940|AT4G01550|AT3G50870|AT1G14350|AT5G22220…
70887	4.4969e-79	1.6514e-77	262	1126	1950	30472	cellular response to chemical stimulus	AT3G59900|AT4G24210|AT5G46210|AT3G03660|AT1G09100|AT5G23570|AT3G08550|AT3G53480|AT1G48270|AT4G35460|AT1G75520|AT5G03280|AT1G27320|AT5G05340|AT1G79200|AT3G16857|AT1G75080|AT1G64520|AT3G50660|AT1G32230|AT3G19580|AT2G14210|AT3G21640|AT2G32460|AT2G01830|AT5G61600|AT4G03190|AT2G01950|AT1G01040|AT3G07360|AT1G04550|AT1G54490|AT1G73590|AT5G20730|AT4G38740|AT1G80340|AT3G28860|AT1G13260|AT3G54430|AT2G36910…
48523	1.2029e-78	4.3824e-77	168	482	1950	30472	negative regulation of cellular process	AT1G17920|AT5G17690|AT5G21150|AT3G06010|AT3G08550|AT3G52430|AT2G30950|AT1G48270|AT3G51060|AT3G20840|AT5G57740|AT1G07430|AT5G08335|AT1G75080|AT5G13080|AT4G16780|AT2G39810|AT1G15750|AT2G30280|AT5G23320|AT1G09570|AT3G19580|AT4G11920|AT5G47390|AT5G63980|AT1G30210|AT4G29350|AT2G37630|AT4G24580|AT5G44280|AT4G37650|AT2G42260|AT3G61150|AT1G69770|AT4G13940|AT4G03190|AT3G10480|AT3G47860|AT3G48430|AT1G04550…
3700	4.8387e-77	1.7491e-75	325	1678	1950	30472	transcription factor activity	AT3G03660|AT3G51060|AT2G39880|AT5G62940|AT1G52880|AT2G24260|AT3G16857|AT1G75080|AT5G13080|AT2G30280|AT5G65080|AT1G20700|AT3G54220|AT3G19580|AT5G66730|AT4G29230|AT5G65640|AT2G38560|AT2G14210|AT5G44160|AT1G30970|AT2G32460|AT4G37650|AT5G61600|AT1G28420|AT4G23810|AT4G17460|AT3G48430|AT1G04550|AT1G53160|AT1G01720|AT5G20730|AT4G32880|AT3G29035|AT2G35940|AT4G01550|AT3G50870|AT1G14350|AT5G22220|AT5G17430…
21700	2.7495e-76	9.862e-75	83	109	1950	30472	developmental maturation	AT3G51460|AT3G02130|AT2G37620|AT4G21060|AT4G02500|AT5G49680|AT4G05530|AT3G06810|AT1G12950|AT5G03280|AT1G75120|AT5G05980|AT1G52240|AT1G50460|AT5G05620|AT2G24260|AT5G05500|AT2G45160|AT2G02470|AT5G43900|AT3G06300|AT5G64070|AT2G35610|AT2G03060|AT1G12560|AT1G34210|AT5G20490|AT1G04160|AT2G17720|AT1G74800|AT2G38120|AT3G62720|AT5G54800|AT1G48380|AT3G20630|AT3G26810|AT5G16910|AT4G00150|AT4G34580|AT2G22475…
23033	3.5818e-76	1.2748e-74	287	1363	1950	30472	signaling pathway	AT4G24210|AT5G46210|AT3G03660|AT1G09100|AT3G49660|AT3G08550|AT1G48270|AT1G75520|AT5G03280|AT2G18390|AT1G27320|AT1G75640|AT5G45800|AT3G16857|AT1G75080|AT1G64520|AT3G49670|AT3G50660|AT1G32230|AT1G09570|AT3G19580|AT3G21640|AT2G32460|AT2G40080|AT5G58440|AT2G01830|AT5G61600|AT2G01950|AT1G51660|AT4G30340|AT3G07360|AT1G04550|AT1G54490|AT1G73590|AT5G20730|AT4G38740|AT2G26670|AT5G47200|AT1G09000|AT1G80340…
9755	4.0732e-76	1.4387e-74	197	682	1950	30472	hormone-mediated signaling pathway	AT4G24210|AT5G46210|AT3G03660|AT3G08550|AT1G48270|AT1G75520|AT5G03280|AT1G27320|AT3G16857|AT1G75080|AT1G64520|AT1G32230|AT3G19580|AT3G21640|AT2G32460|AT2G01830|AT5G61600|AT2G01950|AT3G07360|AT1G04550|AT1G54490|AT1G73590|AT5G20730|AT4G38740|AT1G80340|AT3G28860|AT1G13260|AT3G54430|AT2G36910|AT3G15540|AT1G80100|AT2G47000|AT3G12830|AT4G01540|AT3G03450|AT1G12980|AT1G14000|AT1G59750|AT3G54320|AT3G56860…
48646	1.3653e-75	4.7857e-74	101	170	1950	30472	anatomical structure formation involved in morphogenesis	AT2G26170|AT3G52430|AT5G18700|AT3G57280|AT3G09090|AT2G18390|AT5G57740|AT1G77300|AT3G12810|AT1G27600|AT5G64390|AT2G31650|AT4G35910|AT5G53950|AT2G31090|AT5G65000|AT2G37630|AT3G54180|AT1G74560|AT5G11110|AT2G34925|AT1G73590|AT5G20730|AT4G33210|AT4G00220|AT1G55020|AT3G28860|AT4G32810|AT1G17980|AT3G54150|AT1G33430|AT4G07410|AT5G63370|AT3G22400|AT3G53180|AT3G43210|AT4G38630|AT3G02000|AT3G24770|AT1G15570…
9856	5.3508e-75	1.8615e-73	119	246	1950	30472	pollination	AT5G26720|AT4G05410|AT5G49680|AT2G34590|AT5G48230|AT4G28650|AT3G01640|AT4G35460|AT1G20090|AT5G65930|AT1G76850|AT1G02140|AT4G14880|AT4G15570|AT3G56640|AT5G14850|AT5G35700|AT4G24580|AT1G02410|AT5G07370|AT2G34090|AT2G41210|AT3G45040|AT2G43750|AT1G04950|AT5G47200|AT3G06430|AT2G34850|AT3G08970|AT3G54150|AT1G09080|AT1G72150|AT1G79500|AT4G38350|AT4G17615|AT1G03010|AT3G01150|AT5G17020|AT1G08660|AT1G15330…
9416	2.9525e-74	1.0195e-72	195	684	1950	30472	response to light stimulus	AT2G35720|AT3G02570|AT5G46210|AT5G17690|AT3G08550|AT2G30950|AT1G48270|AT2G45400|AT1G69640|AT1G64520|AT5G14170|AT1G09570|AT5G44160|AT3G57290|AT2G42260|AT2G44680|AT2G40080|AT1G76500|AT2G48120|AT1G73590|AT5G20730|AT4G38740|AT2G26670|AT2G30490|AT2G35940|AT1G10670|AT5G23670|AT1G80340|AT3G28860|AT2G36910|AT3G15540|AT2G46830|AT1G22770|AT1G75540|AT2G25930|AT1G03010|AT5G57360|AT5G26930|AT4G00450|AT5G48300…
9314	5.0708e-73	1.738e-71	198	715	1950	30472	response to radiation	AT2G35720|AT3G02570|AT5G46210|AT5G17690|AT3G08550|AT2G30950|AT1G48270|AT2G45400|AT1G69640|AT1G64520|AT5G14170|AT1G09570|AT5G44160|AT3G57290|AT2G42260|AT2G44680|AT2G40080|AT1G76500|AT2G48120|AT1G73590|AT5G20730|AT4G38740|AT2G26670|AT2G30490|AT2G35940|AT1G10670|AT5G23670|AT1G80340|AT3G28860|AT2G36910|AT3G15540|AT2G46830|AT1G22770|AT1G75540|AT2G25930|AT1G03010|AT5G57360|AT5G26930|AT4G00450|AT5G48300…
48518	5.2002e-73	1.7692e-71	175	563	1950	30472	positive regulation of biological process	AT3G59900|AT4G24210|AT2G26170|AT3G54610|AT1G09100|AT4G31820|AT3G52430|AT1G73500|AT4G03110|AT1G48270|AT3G51060|AT4G29860|AT1G25540|AT5G62940|AT5G61730|AT1G26870|AT5G03280|AT1G77300|AT5G04410|AT1G02140|AT1G07430|AT3G11440|AT2G25110|AT1G33280|AT2G38440|AT4G11920|AT5G47390|AT5G63980|AT5G44160|AT2G32460|AT2G44680|AT2G40080|AT4G17500|AT4G18710|AT5G61600|AT3G44110|AT5G01270|AT5G61960|AT4G23810|AT5G13010…
10053	1.1866e-72	4.0076e-71	86	125	1950	30472	root epidermal cell differentiation	AT3G51460|AT2G37620|AT4G21060|AT4G02500|AT5G49680|AT4G26270|AT4G05530|AT3G06810|AT1G12950|AT5G03280|AT1G75120|AT5G05980|AT1G52240|AT5G37850|AT1G50460|AT5G05620|AT2G24260|AT5G05500|AT2G45160|AT1G78870|AT1G05850|AT2G02470|AT5G13080|AT5G43900|AT3G06300|AT5G64070|AT2G35610|AT1G12560|AT1G64440|AT5G20490|AT1G12040|AT1G04160|AT2G17720|AT1G74800|AT2G38120|AT3G62720|AT1G48380|AT3G20630|AT5G16910|AT4G00150…
9733	2.0176e-72	6.7649e-71	149	411	1950	30472	response to auxin stimulus	AT3G59900|AT3G03660|AT4G05530|AT3G53480|AT3G20840|AT1G75520|AT1G26870|AT5G03280|AT1G19790|AT5G57740|AT2G01420|AT1G79200|AT2G46690|AT2G22240|AT4G16780|AT1G64520|AT1G15750|AT5G50320|AT1G30330|AT2G37630|AT3G21640|AT4G18710|AT4G03190|AT2G01950|AT5G01270|AT1G48410|AT1G04550|AT1G73590|AT5G20730|AT4G17980|AT4G32880|AT2G04160|AT5G24520|AT1G08030|AT3G28860|AT5G22220|AT4G32810|AT3G54430|AT5G40770|AT2G36910…
10073	7.1426e-72	2.3776e-70	81	111	1950	30472	meristem maintenance	AT3G02130|AT1G44900|AT5G24740|AT2G33860|AT3G06010|AT4G08920|AT3G08550|AT3G07780|AT5G19310|AT2G31160|AT2G15790|AT4G27760|AT3G44600|AT1G71040|AT5G02030|AT4G32551|AT2G45160|AT3G16857|AT1G51190|AT2G20140|AT1G04400|AT4G24540|AT3G55510|AT3G49670|AT3G06020|AT4G11920|AT1G71696|AT5G63780|AT4G28980|AT5G48160|AT5G44280|AT4G00150|AT1G69380|AT1G23010|AT4G28190|AT4G29040|AT1G70560|AT2G32700|AT2G04025|AT1G52150…
51093	1.6554e-71	5.471e-70	92	148	1950	30472	negative regulation of developmental process	AT5G65050|AT1G17920|AT5G17490|AT5G46210|AT5G17690|AT3G06010|AT1G61040|AT3G08550|AT3G05040|AT3G07780|AT5G19310|AT5G49160|AT2G31160|AT3G20840|AT4G13750|AT1G77300|AT5G02030|AT2G45160|AT1G51190|AT3G12810|AT2G20140|AT4G24540|AT1G56260|AT4G29830|AT1G77080|AT5G65080|AT4G11920|AT2G38560|AT5G63780|AT4G28980|AT5G67100|AT1G30970|AT5G48160|AT4G26000|AT5G44280|AT4G00150|AT3G61150|AT4G29040|AT1G70560|AT1G79730…
35295	1.1499e-68	3.7468e-67	95	167	1950	30472	tube development	AT3G01040|AT5G23530|AT3G05000|AT5G47100|AT5G26720|AT3G09840|AT5G15470|AT5G49680|AT4G05450|AT2G34590|AT5G48230|AT1G68990|AT4G28650|AT3G58170|AT2G37540|AT3G01640|AT5G03080|AT1G20090|AT3G17220|AT1G76850|AT3G12690|AT1G02140|AT4G14880|AT4G15570|AT5G64070|AT3G03110|AT3G28630|AT3G56960|AT3G56640|AT5G55810|AT5G14850|AT5G35700|AT4G24580|AT2G43790|AT2G47510|AT5G07370|AT5G09350|AT3G45640|AT5G61760|AT1G53000…
48868	1.1499e-68	3.7468e-67	95	167	1950	30472	pollen tube development	AT3G01040|AT5G23530|AT3G05000|AT5G47100|AT5G26720|AT3G09840|AT5G15470|AT5G49680|AT4G05450|AT2G34590|AT5G48230|AT1G68990|AT4G28650|AT3G58170|AT2G37540|AT3G01640|AT5G03080|AT1G20090|AT3G17220|AT1G76850|AT3G12690|AT1G02140|AT4G14880|AT4G15570|AT5G64070|AT3G03110|AT3G28630|AT3G56960|AT3G56640|AT5G55810|AT5G14850|AT5G35700|AT4G24580|AT2G43790|AT2G47510|AT5G07370|AT5G09350|AT3G45640|AT5G61760|AT1G53000…
10054	3.2105e-68	1.0388e-66	74	97	1950	30472	trichoblast differentiation	AT3G51460|AT2G37620|AT4G21060|AT4G02500|AT5G49680|AT4G05530|AT3G06810|AT1G12950|AT5G03280|AT1G75120|AT5G05980|AT1G52240|AT5G37850|AT1G50460|AT5G05620|AT2G24260|AT5G05500|AT2G45160|AT2G02470|AT5G43900|AT3G06300|AT5G64070|AT2G35610|AT1G12560|AT5G20490|AT1G12040|AT1G04160|AT2G17720|AT1G74800|AT2G38120|AT3G62720|AT1G48380|AT3G20630|AT5G16910|AT4G00150|AT4G34580|AT2G22475|AT4G14430|AT5G56540|AT3G62680…
44428	2.6346e-67	8.4655e-66	242	1105	1950	30472	nuclear part	AT1G44900|AT3G11964|AT1G10570|AT5G17690|AT1G09100|AT3G49660|AT3G56990|AT5G23570|AT3G05040|AT5G63110|AT2G15430|AT1G03910|AT5G37055|AT1G02140|AT3G12810|AT4G01560|AT5G40480|AT1G15110|AT1G32230|AT1G09570|AT4G10710|AT5G43070|AT1G48380|AT1G49590|AT3G57290|AT5G44280|AT2G18020|AT3G12380|AT4G03190|AT3G44750|AT1G01040|AT2G04660|AT2G32550|AT4G00100|AT1G15440|AT3G50870|AT5G22220|AT5G63370|AT1G60170|AT1G11760…
48764	3.9247e-66	1.2438e-64	71	92	1950	30472	trichoblast maturation	AT3G51460|AT2G37620|AT4G21060|AT4G02500|AT5G49680|AT4G05530|AT3G06810|AT1G12950|AT5G03280|AT1G75120|AT5G05980|AT1G52240|AT1G50460|AT5G05620|AT2G24260|AT5G05500|AT2G45160|AT2G02470|AT5G43900|AT3G06300|AT5G64070|AT2G35610|AT1G12560|AT5G20490|AT1G04160|AT2G17720|AT1G74800|AT2G38120|AT3G62720|AT1G48380|AT3G20630|AT5G16910|AT4G00150|AT4G34580|AT2G22475|AT4G14430|AT5G56540|AT4G18710|AT5G09350|AT1G19360…
48765	3.9247e-66	1.2438e-64	71	92	1950	30472	root hair cell differentiation	AT3G51460|AT2G37620|AT4G21060|AT4G02500|AT5G49680|AT4G05530|AT3G06810|AT1G12950|AT5G03280|AT1G75120|AT5G05980|AT1G52240|AT1G50460|AT5G05620|AT2G24260|AT5G05500|AT2G45160|AT2G02470|AT5G43900|AT3G06300|AT5G64070|AT2G35610|AT1G12560|AT5G20490|AT1G04160|AT2G17720|AT1G74800|AT2G38120|AT3G62720|AT1G48380|AT3G20630|AT5G16910|AT4G00150|AT4G34580|AT2G22475|AT4G14430|AT5G56540|AT4G18710|AT5G09350|AT1G19360…
40008	9.0686e-66	2.8544e-64	107	228	1950	30472	regulation of growth	AT3G59900|AT1G44900|AT3G07220|AT3G06010|AT3G57200|AT4G08920|AT3G08550|AT1G19270|AT5G03680|AT5G58270|AT5G37055|AT3G16857|AT3G11440|AT2G46690|AT1G63700|AT1G75080|AT2G03060|AT3G49670|AT3G06020|AT5G47390|AT5G63980|AT1G71696|AT4G24580|AT1G69380|AT2G20610|AT2G04025|AT5G20730|AT2G26670|AT4G20270|AT3G08850|AT1G08030|AT4G24190|AT3G52770|AT5G10510|AT2G20000|AT2G25010|AT3G12830|AT5G24630|AT5G46520|AT5G56600…
48469	1.5579e-65	4.8706e-64	71	93	1950	30472	cell maturation	AT3G51460|AT2G37620|AT4G21060|AT4G02500|AT5G49680|AT4G05530|AT3G06810|AT1G12950|AT5G03280|AT1G75120|AT5G05980|AT1G52240|AT1G50460|AT5G05620|AT2G24260|AT5G05500|AT2G45160|AT2G02470|AT5G43900|AT3G06300|AT5G64070|AT2G35610|AT1G12560|AT5G20490|AT1G04160|AT2G17720|AT1G74800|AT2G38120|AT3G62720|AT1G48380|AT3G20630|AT5G16910|AT4G00150|AT4G34580|AT2G22475|AT4G14430|AT5G56540|AT4G18710|AT5G09350|AT1G19360…
90351	1.8323e-65	5.69e-64	72	96	1950	30472	seedling development	AT4G24210|AT4G03430|AT5G42890|AT1G66730|AT4G28370|AT4G21540|AT1G48270|AT5G66460|AT4G09140|AT3G22942|AT5G07120|AT5G08450|AT1G74350|AT5G13200|AT4G38490|AT4G32551|AT1G09970|AT3G13540|AT3G05290|AT3G54810|AT5G53180|AT5G27520|AT1G30010|AT4G27490|AT2G38560|AT1G49590|AT1G09090|AT4G34460|AT5G58440|AT5G11310|AT3G10160|AT4G29040|AT5G57710|AT2G32700|AT4G32320|AT5G57390|AT3G15730|AT1G62750|AT1G34120|AT1G80340…
10149	1.0658e-64	3.2657e-63	68	86	1950	30472	senescence	AT5G51640|AT3G52430|AT4G02380|AT1G66330|AT1G73500|AT5G66100|AT4G01250|AT4G03550|AT4G02260|AT2G39200|AT1G69490|AT5G03280|AT1G27320|AT1G11190|AT3G01090|AT5G05700|AT1G20900|AT5G44160|AT2G39730|AT2G43790|AT5G37600|AT3G15010|AT2G46700|AT4G23810|AT1G17020|AT1G54130|AT1G20780|AT5G13170|AT5G12080|AT4G12570|AT5G17290|AT3G29035|AT4G10500|AT2G13790|AT5G62000|AT5G62165|AT3G19190|AT2G35980|AT5G11520|AT2G22300…
10260	1.0658e-64	3.2657e-63	68	86	1950	30472	organ senescence	AT5G51640|AT3G52430|AT4G02380|AT1G66330|AT1G73500|AT5G66100|AT4G01250|AT4G03550|AT4G02260|AT2G39200|AT1G69490|AT5G03280|AT1G27320|AT1G11190|AT3G01090|AT5G05700|AT1G20900|AT5G44160|AT2G39730|AT2G43790|AT5G37600|AT3G15010|AT2G46700|AT4G23810|AT1G17020|AT1G54130|AT1G20780|AT5G13170|AT5G12080|AT4G12570|AT5G17290|AT3G29035|AT4G10500|AT2G13790|AT5G62000|AT5G62165|AT3G19190|AT2G35980|AT5G11520|AT2G22300…
23052	1.4424e-63	4.3906e-62	314	1791	1950	30472	signaling	AT4G24210|AT5G46210|AT3G03660|AT1G09100|AT3G49660|AT3G08550|AT1G48270|AT1G75520|AT5G03280|AT2G18390|AT1G27320|AT1G75640|AT5G45800|AT3G16857|AT1G75080|AT1G64520|AT3G49670|AT3G50660|AT1G32230|AT1G09570|AT3G19580|AT4G11920|AT3G21640|AT4G24580|AT2G32460|AT2G40080|AT5G58440|AT2G01830|AT5G61600|AT2G01950|AT1G51660|AT4G30340|AT3G07360|AT1G04550|AT1G54490|AT1G73590|AT5G20730|AT4G38740|AT2G26670|AT5G47200…
9826	3.1103e-63	9.3451e-62	111	258	1950	30472	unidimensional cell growth	AT3G51460|AT5G26720|AT3G08550|AT5G49720|AT5G49680|AT5G48230|AT1G20090|AT1G76850|AT5G05620|AT5G05500|AT4G14880|AT4G16780|AT3G50660|AT3G56640|AT5G35700|AT4G24580|AT3G54180|AT5G07370|AT4G27060|AT3G48430|AT2G41210|AT3G13870|AT2G43750|AT1G54490|AT1G04950|AT5G47200|AT3G08970|AT3G07880|AT4G22970|AT1G09080|AT1G72150|AT1G79500|AT4G17615|AT2G25930|AT5G03540|AT5G44610|AT1G03010|AT1G01510|AT5G17020|AT1G08660…
60560	3.1103e-63	9.3451e-62	111	258	1950	30472	developmental growth involved in morphogenesis	AT3G51460|AT5G26720|AT3G08550|AT5G49720|AT5G49680|AT5G48230|AT1G20090|AT1G76850|AT5G05620|AT5G05500|AT4G14880|AT4G16780|AT3G50660|AT3G56640|AT5G35700|AT4G24580|AT3G54180|AT5G07370|AT4G27060|AT3G48430|AT2G41210|AT3G13870|AT2G43750|AT1G54490|AT1G04950|AT5G47200|AT3G08970|AT3G07880|AT4G22970|AT1G09080|AT1G72150|AT1G79500|AT4G17615|AT2G25930|AT5G03540|AT5G44610|AT1G03010|AT1G01510|AT5G17020|AT1G08660…
51301	4.6668e-63	1.3931e-61	116	284	1950	30472	cell division	AT3G07980|AT3G57200|AT3G23670|AT3G08550|AT5G18700|AT5G49160|AT1G26870|AT5G03280|AT1G46480|AT1G71440|AT5G05620|AT2G44950|AT5G67260|AT1G20700|AT3G54220|AT4G11920|AT5G16750|AT3G60740|AT2G37630|AT4G26760|AT3G54180|AT4G37650|AT2G42260|AT3G15770|AT4G17500|AT2G22870|AT5G61600|AT1G69770|AT1G01040|AT2G34925|AT2G04660|AT1G77390|AT1G54490|AT4G00100|AT1G10270|AT5G40770|AT1G55540|AT2G14120|AT4G22970|AT3G50070…
10150	6.4684e-61	1.9185e-59	64	81	1950	30472	leaf senescence	AT5G51640|AT3G52430|AT4G02380|AT1G66330|AT1G73500|AT5G66100|AT4G01250|AT4G03550|AT4G02260|AT2G39200|AT1G69490|AT5G03280|AT1G27320|AT1G11190|AT5G05700|AT1G20900|AT2G39730|AT2G43790|AT5G37600|AT3G15010|AT2G46700|AT4G23810|AT1G54130|AT1G20780|AT5G13170|AT5G12080|AT4G12570|AT5G17290|AT3G29035|AT4G10500|AT2G13790|AT5G62000|AT5G62165|AT3G19190|AT2G35980|AT5G11520|AT2G22300|AT1G73680|AT2G41060|AT5G39610…
48610	2.0157e-60	5.9406e-59	102	227	1950	30472	reproductive cellular process	AT5G26720|AT4G05410|AT1G64110|AT5G49680|AT5G48230|AT3G29810|AT5G49160|AT1G20090|AT1G76850|AT3G11440|AT4G14880|AT4G15570|AT3G49670|AT3G56640|AT5G35700|AT4G24580|AT1G21070|AT5G07370|AT1G69770|AT2G41210|AT2G43750|AT1G04950|AT5G47200|AT5G22740|AT3G08970|AT5G57800|AT1G09080|AT1G02720|AT1G72150|AT1G79500|AT4G17615|AT5G03540|AT1G03010|AT1G06520|AT5G17020|AT1G08660|AT3G06440|AT1G34350|AT3G57670|AT4G02350…
3676	2.101e-60	6.1528e-59	564	4553	1950	30472	nucleic acid binding	AT3G11964|AT5G17690|AT3G06010|AT2G15430|AT5G56930|AT5G49160|AT3G51060|AT2G39880|AT2G24260|AT2G27530|AT2G02470|AT1G75080|AT3G12810|AT5G13080|AT5G22800|AT4G01560|AT3G54220|AT3G19580|AT5G66730|AT5G65640|AT2G38560|AT2G14210|AT3G52280|AT4G37650|AT4G14510|AT1G69770|AT3G44750|AT1G53160|AT1G01720|AT2G02480|AT1G54490|AT5G20730|AT3G29035|AT4G25320|AT4G00100|AT4G01550|AT5G17430|AT3G54430|AT3G09660|AT5G62165…
48522	2.4523e-59	7.1364e-58	138	431	1950	30472	positive regulation of cellular process	AT4G24210|AT2G26170|AT3G54610|AT1G09100|AT3G52430|AT1G73500|AT4G03110|AT1G48270|AT3G51060|AT4G29860|AT1G25540|AT5G62940|AT5G61730|AT1G26870|AT5G03280|AT1G77300|AT5G04410|AT1G07430|AT3G11440|AT1G33280|AT2G38440|AT4G11920|AT5G47390|AT5G63980|AT5G44160|AT2G32460|AT4G17500|AT5G61600|AT5G01270|AT5G61960|AT4G23810|AT5G13010|AT2G04025|AT1G54490|AT1G08910|AT5G20730|AT4G32880|AT4G01550|AT2G32950|AT5G22220…
7568	4.4584e-57	1.2893e-55	76	128	1950	30472	aging	AT5G51640|AT3G52430|AT4G02380|AT1G66330|AT1G73500|AT5G66100|AT4G01250|AT4G03550|AT4G02260|AT2G39200|AT1G69490|AT5G03280|AT1G27320|AT1G11190|AT3G01090|AT4G14880|AT5G05700|AT1G20900|AT5G44160|AT2G39730|AT2G43790|AT5G37600|AT3G15010|AT2G46700|AT4G23810|AT1G17020|AT2G42620|AT1G54130|AT1G20780|AT5G46700|AT5G13170|AT5G12080|AT4G12570|AT5G17290|AT3G29035|AT1G10670|AT4G10500|AT2G13790|AT5G62000|AT5G62165…
7049	5.3287e-57	1.5314e-55	134	423	1950	30472	cell cycle	AT1G44900|AT3G07980|AT5G21150|AT3G57200|AT3G23670|AT3G08550|AT5G18700|AT5G49160|AT1G48270|AT1G01690|AT1G71440|AT5G05620|AT5G67260|AT1G15110|AT5G15540|AT4G11920|AT3G60740|AT1G48380|AT4G26760|AT3G54180|AT2G42260|AT1G69770|AT1G47200|AT1G01040|AT5G61960|AT2G04660|AT1G77390|AT4G00100|AT1G14350|AT5G22220|AT3G09660|AT2G14120|AT4G22970|AT5G63370|AT3G50070|AT5G57880|AT1G31810|AT1G72150|AT2G20000|AT3G44540…
48467	7.6316e-57	2.1797e-55	64	88	1950	30472	gynoecium development	AT5G16560|AT5G21150|AT2G34710|AT3G55220|AT4G15180|AT1G17560|AT3G49500|AT1G68990|AT3G51060|AT4G29860|AT1G75520|AT3G44600|AT1G19270|AT1G52880|AT5G64960|AT1G77300|AT3G48520|AT1G79200|AT1G43850|AT1G75080|AT5G43900|AT5G62090|AT1G30490|AT5G20490|AT3G58780|AT1G11870|AT4G26000|AT2G43790|AT1G69690|AT3G45640|AT1G17580|AT1G70560|AT1G25350|AT5G41410|AT1G52150|AT4G17460|AT4G36920|AT4G17300|AT5G58560|AT3G55400…
9909	3.1862e-56	9.0445e-55	80	146	1950	30472	regulation of flower development	AT5G65050|AT4G04885|AT5G17690|AT1G61040|AT3G05040|AT4G31820|AT3G24440|AT5G49160|AT3G06930|AT1G25540|AT3G44600|AT3G10390|AT1G27320|AT1G77300|AT5G03680|AT5G35750|AT4G32551|AT5G37055|AT5G13480|AT1G43850|AT5G37770|AT3G12810|AT5G58230|AT1G26830|AT1G04400|AT5G14170|AT4G29830|AT1G77080|AT5G65080|AT2G31650|AT2G38560|AT5G67100|AT1G30970|AT2G40080|AT3G44110|AT4G28190|AT1G79730|AT2G32700|AT5G13290|AT1G10670…
71365	7.3245e-56	2.0665e-54	93	204	1950	30472	cellular response to auxin stimulus	AT1G05180|AT3G03660|AT2G33860|AT2G32410|AT3G54010|AT1G56010|AT3G53480|AT1G16510|AT3G20840|AT1G75520|AT5G03280|AT1G19790|AT2G01420|AT5G13680|AT1G79200|AT3G13300|AT2G46370|AT2G46690|AT1G51190|AT3G48360|AT4G16340|AT5G50320|AT3G02260|AT2G38120|AT2G39175|AT1G30330|AT4G02570|AT3G21640|AT2G45210|AT2G42580|AT3G62680|AT2G01950|AT5G01270|AT2G42620|AT1G04550|AT5G57390|AT5G46700|AT1G73590|AT5G20730|AT2G22670…
10051	8.5793e-56	2.4058e-54	57	70	1950	30472	xylem and phloem pattern formation	AT2G32010|AT5G16560|AT1G19300|AT3G51060|AT1G17840|AT3G44600|AT4G13750|AT1G43130|AT5G02030|AT1G20330|AT5G22720|AT4G24220|AT1G15750|AT2G42580|AT2G01950|AT1G48410|AT5G13010|AT1G70560|AT1G04550|AT2G02560|AT5G46700|AT1G73590|AT4G18750|AT4G25320|AT5G16780|AT3G52770|AT5G49660|AT4G07410|AT1G31770|AT4G24670|AT2G20120|AT1G68060|AT4G36890|AT4G20910|AT4G08150|AT5G13300|AT3G15380|AT5G55540|AT3G63300|AT1G27340…
9932	1.3726e-55	3.8259e-54	79	144	1950	30472	cell tip growth	AT3G01040|AT3G51460|AT5G23530|AT5G47100|AT5G26720|AT3G09840|AT5G15470|AT5G49680|AT5G48230|AT1G68990|AT3G58170|AT2G37540|AT1G20090|AT3G17220|AT1G76850|AT3G12690|AT5G05620|AT2G45160|AT4G14880|AT5G64070|AT3G03110|AT5G20490|AT3G28630|AT3G56960|AT3G56640|AT5G55810|AT5G35700|AT4G24580|AT4G00150|AT4G34580|AT5G07370|AT5G09350|AT1G53000|AT2G41210|AT3G13870|AT2G43750|AT1G04950|AT5G47200|AT3G08970|AT3G07880…
51704	5.3388e-55	1.4792e-53	265	1481	1950	30472	multi-organism process	AT5G26720|AT5G21150|AT5G23570|AT5G49160|AT4G35460|AT5G03280|AT1G27320|AT1G76850|AT3G44880|AT5G37055|AT1G02140|AT4G14880|AT3G12810|AT2G25110|AT4G23250|AT1G32230|AT3G56640|AT5G14850|AT4G24580|AT2G01830|AT5G61600|AT4G03190|AT5G53550|AT3G44750|AT1G01040|AT1G51660|AT2G34090|AT3G12140|AT4G23810|AT3G45040|AT5G47200|AT2G35940|AT2G34850|AT5G24400|AT1G55020|AT5G18520|AT2G36910|AT1G31930|AT2G22300|AT1G72150…
9845	1.2094e-53	3.331e-52	61	85	1950	30472	seed germination	AT4G24210|AT4G03430|AT5G42890|AT1G66730|AT4G28370|AT4G21540|AT1G48270|AT5G66460|AT4G09140|AT3G22942|AT5G08450|AT1G74350|AT5G13200|AT4G32551|AT1G09970|AT3G13540|AT3G54810|AT5G53180|AT1G30010|AT4G27490|AT2G38560|AT1G49590|AT1G09090|AT4G34460|AT5G11310|AT5G57710|AT2G32700|AT4G32320|AT5G57390|AT3G15730|AT1G62750|AT1G34120|AT1G80340|AT3G25230|AT2G36270|AT1G60170|AT1G18080|AT4G13850|AT3G18130|AT3G63420…
10101	4.1307e-53	1.1309e-51	49	54	1950	30472	post-embryonic root morphogenesis	AT3G59420|AT1G49430|AT1G25220|AT4G13510|AT5G57740|AT1G77740|AT3G07390|AT3G05090|AT1G68765|AT1G32230|AT4G35910|AT3G02260|AT2G38120|AT2G34680|AT1G02410|AT1G74560|AT4G29040|AT5G20730|AT2G22670|AT4G14550|AT5G56580|AT4G33495|AT2G04160|AT1G13980|AT5G18560|AT1G55020|AT4G37070|AT5G25890|AT4G07410|AT3G22400|AT3G53180|AT2G45420|AT2G23430|AT5G09680|AT5G65710|AT5G03540|AT2G42430|AT2G35510|AT1G18800|AT1G15570…
10102	5.9954e-52	1.6318e-50	48	53	1950	30472	lateral root morphogenesis	AT2G04160|AT1G13980|AT5G18560|AT1G55020|AT4G37070|AT5G25890|AT3G59420|AT4G07410|AT3G22400|AT3G53180|AT1G49430|AT1G25220|AT2G45420|AT2G23430|AT5G09680|AT4G13510|AT5G65710|AT5G57740|AT1G77740|AT5G03540|AT3G07390|AT3G05090|AT2G42430|AT2G35510|AT1G18800|AT1G68765|AT1G32230|AT4G35910|AT1G15570|AT3G02260|AT2G38120|AT2G34680|AT4G12550|AT1G74560|AT4G29040|AT1G19220|AT4G28490|AT3G62980|AT1G28560|AT1G21410…
9734	2.5723e-50	6.9294e-49	85	190	1950	30472	auxin mediated signaling pathway	AT1G05180|AT3G03660|AT2G33860|AT2G32410|AT3G54010|AT1G56010|AT1G16510|AT3G20840|AT1G75520|AT5G03280|AT1G19790|AT2G01420|AT5G13680|AT2G46690|AT1G51190|AT3G48360|AT4G16340|AT5G50320|AT3G02260|AT2G38120|AT2G39175|AT1G30330|AT4G02570|AT3G21640|AT2G45210|AT2G42580|AT2G01950|AT5G01270|AT2G42620|AT1G04550|AT5G57390|AT5G46700|AT1G73590|AT5G20730|AT2G22670|AT4G14550|AT2G34650|AT3G53020|AT1G56150|AT3G28860…
10026	2.5909e-50	6.9294e-49	61	92	1950	30472	trichome differentiation	AT1G17920|AT2G22640|AT4G15415|AT1G30825|AT5G65930|AT4G22910|AT3G13540|AT1G74030|AT5G58230|AT5G55480|AT5G43900|AT1G56580|AT1G66740|AT5G20490|AT1G80350|AT5G18410|AT1G33240|AT2G38440|AT3G23980|AT1G67030|AT4G20780|AT1G68360|AT2G22475|AT2G42260|AT2G46225|AT4G19600|AT2G27600|AT5G64630|AT1G17580|AT1G13180|AT4G01800|AT2G02480|AT5G24520|AT4G00100|AT4G01710|AT1G03060|AT5G22220|AT3G20780|AT4G26690|AT3G16630…
35315	2.5909e-50	6.9294e-49	61	92	1950	30472	hair cell differentiation	AT1G17920|AT2G22640|AT4G15415|AT1G30825|AT5G65930|AT4G22910|AT3G13540|AT1G74030|AT5G58230|AT5G55480|AT5G43900|AT1G56580|AT1G66740|AT5G20490|AT1G80350|AT5G18410|AT1G33240|AT2G38440|AT3G23980|AT1G67030|AT4G20780|AT1G68360|AT2G22475|AT2G42260|AT2G46225|AT4G19600|AT2G27600|AT5G64630|AT1G17580|AT1G13180|AT4G01800|AT2G02480|AT5G24520|AT4G00100|AT4G01710|AT1G03060|AT5G22220|AT3G20780|AT4G26690|AT3G16630…
9640	6.0111e-50	1.5985e-48	54	71	1950	30472	photomorphogenesis	AT1G10370|AT5G46210|AT4G08920|AT5G42970|AT5G48150|AT2G18790|AT3G47710|AT3G61140|AT1G69640|AT5G11260|AT2G46370|AT1G09530|AT2G37678|AT1G20900|AT5G14250|AT1G09570|AT3G02260|AT5G23040|AT3G57290|AT4G28860|AT1G76500|AT1G79810|AT2G26990|AT1G22920|AT1G73590|AT2G46340|AT4G14110|AT4G38740|AT5G23670|AT1G02090|AT2G32950|AT3G28860|AT3G08010|AT2G36910|AT4G37580|AT1G75540|AT3G48780|AT1G61620|AT2G04030|AT5G15160…
48509	1.2418e-49	3.2832e-48	62	97	1950	30472	regulation of meristem development	AT1G44900|AT5G24740|AT2G26170|AT4G08920|AT3G22780|AT1G27370|AT4G40060|AT3G44600|AT3G47710|AT1G27320|AT5G35750|AT5G45600|AT3G16857|AT1G04400|AT4G24540|AT3G49670|AT3G06020|AT1G71696|AT5G44160|AT5G43270|AT1G69380|AT5G12840|AT2G01830|AT4G28190|AT2G04025|AT2G42620|AT1G52150|AT5G46700|AT5G13290|AT2G26670|AT4G20270|AT2G25180|AT1G08030|AT4G31920|AT4G24190|AT3G52770|AT5G23150|AT5G10510|AT1G13620|AT3G18730…
9605	2.3178e-48	6.0933e-47	125	432	1950	30472	response to external stimulus	AT3G02570|AT4G08920|AT1G12910|AT4G02380|AT4G21100|AT4G28650|AT4G02260|AT2G18790|AT1G25540|AT3G61140|AT1G71040|AT2G18390|AT1G27320|AT1G02140|AT5G05860|AT3G01090|AT2G22240|AT2G02470|AT4G16780|AT4G15570|AT3G54220|AT1G09570|AT5G14850|AT2G14210|AT1G23010|AT2G40080|AT2G01830|AT5G07370|AT4G03190|AT2G20610|AT1G54130|AT1G54490|AT1G73590|AT5G20730|AT2G46340|AT4G14110|AT4G38740|AT2G26670|AT5G17290|AT1G10670…
10087	2.3341e-48	6.1016e-47	52	68	1950	30472	phloem or xylem histogenesis	AT3G01680|AT1G09540|AT5G66300|AT5G62940|AT1G27320|AT5G02030|AT5G35750|AT5G05340|AT4G13195|AT4G31910|AT3G55830|AT5G61480|AT4G02570|AT5G23080|AT2G18060|AT4G36160|AT1G70560|AT1G52150|AT4G18750|AT4G32880|AT1G62700|AT4G00220|AT1G13980|AT4G25320|AT2G28250|AT5G16780|AT1G62990|AT5G19530|AT4G24670|AT3G21710|AT2G45420|AT4G08150|AT5G13300|AT3G15380|AT2G18290|AT3G63300|AT1G80100|AT1G78770|AT1G05630|AT5G13180…
48767	3.3645e-48	8.7457e-47	47	55	1950	30472	root hair elongation	AT3G51460|AT2G34650|AT2G37620|AT5G45420|AT4G02500|AT3G54870|AT5G49680|AT3G60630|AT4G05530|AT3G06810|AT1G12950|AT5G05980|AT5G05620|AT2G24260|AT5G05500|AT5G44610|AT2G45160|AT2G26420|AT2G47000|AT2G02470|AT5G43900|AT4G38630|AT5G64070|AT1G12560|AT5G20490|AT1G04160|AT1G70940|AT3G62720|AT3G20630|AT5G16910|AT4G00150|AT4G34580|AT3G43960|AT4G14430|AT5G56540|AT3G16640|AT1G49240|AT5G09350|AT3G18780|AT5G13010…
43234	4.3674e-48	1.1289e-46	289	1840	1950	30472	protein complex	AT4G24210|AT1G44900|AT5G46210|AT1G09100|AT3G49660|AT1G15220|AT3G56990|AT2G15430|AT4G04040|AT3G04630|AT2G22640|AT1G76850|AT5G37055|AT1G02140|AT3G48680|AT3G12810|AT1G64520|AT5G40480|AT5G21140|AT5G18410|AT3G56640|AT2G38440|AT4G11920|AT4G10710|AT3G57290|AT5G44280|AT4G26760|AT2G44680|AT3G12380|AT5G58440|AT4G03190|AT4G27060|AT1G13180|AT2G04660|AT2G02480|AT2G32550|AT1G10670|AT1G15440|AT3G50870|AT5G22220…
9561	7.2726e-48	1.8695e-46	51	66	1950	30472	megagametogenesis	AT1G31470|AT3G56990|AT5G22000|AT4G30930|AT5G48030|AT2G34790|AT3G63480|AT1G24450|AT1G16280|AT2G18390|AT2G20585|AT5G28540|AT4G14040|AT5G42020|AT4G00310|AT4G05440|AT3G59550|AT2G31170|AT4G33050|AT2G42260|AT4G37890|AT2G04660|AT4G14790|AT2G47990|AT2G20490|AT1G01960|AT5G57790|AT2G35940|AT4G00020|AT3G57860|AT2G41500|AT1G55420|AT1G19520|AT1G31817|AT3G43210|AT1G50240|AT4G13890|AT4G14220|AT2G34860|AT5G23420…
32991	1.6937e-46	4.3297e-45	370	2727	1950	30472	macromolecular complex	AT4G24210|AT1G44900|AT5G46210|AT3G11964|AT1G09100|AT5G21150|AT3G49660|AT1G15220|AT3G56990|AT5G23570|AT2G15430|AT4G04040|AT3G04630|AT2G22640|AT1G03910|AT1G76850|AT2G27530|AT5G37055|AT1G02140|AT3G48680|AT3G12810|AT1G70070|AT1G64520|AT4G01560|AT5G40480|AT5G21140|AT5G18410|AT3G56640|AT2G38440|AT4G11920|AT4G10710|AT3G04400|AT3G57290|AT5G44280|AT4G26760|AT2G18020|AT5G37600|AT2G44680|AT3G12380|AT4G14510…
48532	1.3886e-45	3.5302e-44	44	51	1950	30472	anatomical structure arrangement	AT1G55580|AT5G16780|AT2G34710|AT1G56010|AT3G07780|AT3G52770|AT1G27370|AT5G27030|AT3G05840|AT3G44600|AT3G15880|AT3G18730|AT2G20000|AT5G55540|AT5G55300|AT3G13300|AT3G16830|AT1G13870|AT1G11130|AT1G80490|AT1G15750|AT1G20700|AT1G30490|AT3G50660|AT5G26751|AT5G51430|AT4G32700|AT5G53950|AT5G60690|AT5G48160|AT2G35350|AT2G34780|AT1G72560|AT4G29040|AT5G64630|AT1G28560|AT5G13570|AT1G52150|AT1G36160|AT5G46700…
6950	2.8187e-45	7.1267e-44	425	3380	1950	30472	response to stress	AT1G10570|AT5G17690|AT3G06010|AT5G63110|AT4G35460|AT5G03280|AT5G05340|AT3G44880|AT5G37055|AT2G02470|AT3G12810|AT5G13080|AT2G25110|AT4G24220|AT4G23250|AT5G14170|AT1G55250|AT1G32230|AT3G19580|AT3G23940|AT1G54130|AT1G01720|AT1G54490|AT4G12570|AT4G38740|AT3G29035|AT1G55020|AT1G09000|AT5G40010|AT5G17310|AT1G08030|AT3G09660|AT1G11760|AT1G22770|AT3G44540|AT5G44610|AT5G51020|AT5G13180|AT4G38630|AT4G29810…
48440	1.2143e-44	3.0535e-43	52	75	1950	30472	carpel development	AT5G16560|AT5G21150|AT2G34710|AT3G55220|AT4G15180|AT1G17560|AT3G49500|AT1G68990|AT3G51060|AT4G29860|AT3G44600|AT1G19270|AT1G52880|AT5G64960|AT1G77300|AT3G48520|AT1G43850|AT1G75080|AT5G62090|AT1G30490|AT3G58780|AT1G11870|AT2G43790|AT3G45640|AT1G25350|AT5G41410|AT1G52150|AT4G36920|AT4G17300|AT5G58560|AT3G55400|AT4G25520|AT3G55200|AT5G62000|AT5G05560|AT5G42630|AT4G36930|AT1G51170|AT1G11130|AT1G62360…
9648	1.5394e-44	3.8501e-43	49	66	1950	30472	photoperiodism	AT3G09600|AT5G46210|AT5G17690|AT3G24440|AT1G12910|AT4G40060|AT3G22420|AT2G37860|AT2G21070|AT4G24415|AT5G37770|AT1G79000|AT1G04400|AT1G77080|AT3G08640|AT5G63980|AT5G44160|AT1G30810|AT2G44680|AT2G40080|AT1G18390|AT3G44110|AT1G27650|AT1G51140|AT5G42820|AT2G46340|AT3G01460|AT4G02440|AT2G32950|AT3G26640|AT2G46830|AT5G62640|AT1G25560|AT2G25930|AT3G09190|AT5G57360|AT2G35510|AT4G00450|AT5G48300|AT1G06040…
48573	3.0582e-44	7.6076e-43	46	58	1950	30472	photoperiodism, flowering	AT3G09600|AT5G46210|AT3G01460|AT4G02440|AT5G17690|AT2G32950|AT3G26640|AT3G24440|AT1G12910|AT4G40060|AT3G22420|AT2G46830|AT5G62640|AT1G25560|AT2G25930|AT2G21070|AT4G24415|AT5G37770|AT1G79000|AT1G04400|AT3G09190|AT2G35510|AT1G77080|AT4G00450|AT5G48300|AT1G06040|AT5G63980|AT2G13540|AT3G57230|AT5G44160|AT1G30810|AT2G44680|AT2G40080|AT2G42280|AT1G18390|AT1G28520|AT3G44110|AT1G27650|AT5G64930|AT1G51140…
10090	1.6253e-43	4.0215e-42	50	71	1950	30472	trichome morphogenesis	AT1G17920|AT2G22640|AT4G15415|AT1G30825|AT5G65930|AT4G22910|AT3G13540|AT1G74030|AT5G43900|AT1G56580|AT1G66740|AT5G20490|AT1G80350|AT5G18410|AT1G33240|AT2G38440|AT3G23980|AT4G20780|AT1G68360|AT2G42260|AT2G46225|AT4G19600|AT2G27600|AT1G17580|AT1G13180|AT4G01800|AT2G02480|AT4G00100|AT4G01710|AT1G03060|AT5G22220|AT3G16630|AT1G05230|AT5G28646|AT1G01510|AT5G24630|AT5G23940|AT5G24310|AT3G27000|AT5G45190…
31981	2.7199e-43	6.6941e-42	162	759	1950	30472	nuclear lumen	AT1G44900|AT3G11964|AT1G10570|AT3G54610|AT3G07980|AT3G49660|AT4G05410|AT4G08920|AT3G56990|AT5G23570|AT5G63110|AT2G15430|AT2G18790|AT1G25540|AT1G20090|AT1G03910|AT5G64960|AT5G37055|AT1G02140|AT5G13480|AT1G06220|AT1G02780|AT4G01560|AT5G42020|AT1G32230|AT1G09570|AT5G50320|AT5G16750|AT4G10710|AT2G37630|AT5G43070|AT1G48380|AT1G49590|AT2G18020|AT3G15010|AT5G12840|AT3G12380|AT3G44110|AT3G44750|AT1G01040…
9860	2.932e-43	7.178e-42	62	115	1950	30472	pollen tube growth	AT3G01040|AT5G23530|AT5G47100|AT5G26720|AT3G09840|AT5G15470|AT5G49680|AT5G48230|AT1G68990|AT3G58170|AT2G37540|AT1G20090|AT3G17220|AT1G76850|AT3G12690|AT4G14880|AT5G64070|AT3G03110|AT3G28630|AT3G56960|AT3G56640|AT5G55810|AT5G35700|AT4G24580|AT5G07370|AT5G09350|AT1G53000|AT2G41210|AT2G43750|AT1G04950|AT5G47200|AT3G08970|AT1G56430|AT3G04690|AT3G59760|AT1G71820|AT3G22200|AT1G09080|AT4G38430|AT1G72150…
44281	7.2873e-43	1.7746e-41	315	2226	1950	30472	small molecule metabolic process	AT3G02570|AT2G34630|AT3G49660|AT5G42890|AT5G23570|AT4G04040|AT3G06810|AT5G49160|AT1G48270|AT3G06930|AT5G61730|AT2G45400|AT1G69640|AT5G37850|AT1G50460|AT5G05340|AT3G10870|AT3G05290|AT4G14880|AT5G22800|AT3G05970|AT2G30280|AT3G50660|AT1G15110|AT5G23320|AT2G17720|AT3G23940|AT5G37600|AT4G37770|AT1G69770|AT3G20440|AT1G78240|AT1G54130|AT3G48430|AT1G36160|AT5G58560|AT4G30580|AT2G26670|AT2G30490|AT3G55400…
9639	9.5574e-43	2.3153e-41	83	217	1950	30472	response to red or far red light	AT1G10370|AT5G46210|AT4G08920|AT4G31500|AT5G42970|AT4G21100|AT5G48150|AT4G26430|AT2G18790|AT1G25540|AT3G47710|AT3G61140|AT1G69640|AT5G11260|AT2G46370|AT1G09530|AT4G16780|AT1G26830|AT2G37678|AT1G20900|AT5G17880|AT5G14250|AT1G09570|AT3G02260|AT1G32870|AT5G23040|AT3G57290|AT4G28860|AT2G40080|AT1G76500|AT1G79810|AT1G48410|AT1G70560|AT2G26990|AT1G22920|AT1G73590|AT2G46340|AT4G14110|AT4G38740|AT2G26670…
16568	1.0114e-42	2.4373e-41	85	228	1950	30472	chromatin modification	AT1G16710|AT3G09600|AT5G17690|AT3G54610|AT3G06010|AT1G61040|AT3G24440|AT5G19310|AT5G63110|AT5G18620|AT5G49160|AT3G06930|AT2G47620|AT5G08450|AT3G10390|AT1G77300|AT5G37055|AT5G45600|AT1G21700|AT1G79000|AT2G44950|AT5G39550|AT2G02470|AT3G12810|AT4G39100|AT5G58230|AT1G04400|AT2G36740|AT5G14170|AT4G29830|AT2G31650|AT1G55250|AT1G66740|AT5G24330|AT3G52280|AT5G44280|AT2G22475|AT1G69770|AT4G13940|AT5G09790…
32504	1.4409e-42	3.4544e-41	65	130	1950	30472	multicellular organism reproduction	AT4G24210|AT1G64110|AT4G19180|AT3G54650|AT5G63110|AT4G28370|AT1G30100|AT1G19300|AT1G48270|AT4G29860|AT4G32551|AT1G07430|AT5G58070|AT2G44950|AT3G11440|AT1G54060|AT2G20140|AT1G55250|AT2G06510|AT5G24330|AT5G66730|AT2G38560|AT5G53470|AT3G63210|AT4G29040|AT3G44750|AT3G47860|AT2G32700|AT2G41850|AT4G32320|AT3G07160|AT2G27840|AT5G13170|AT4G25640|AT4G31400|AT2G41500|AT5G40010|AT5G57800|AT4G02280|AT5G62000…
43233	5.0564e-42	1.1998e-40	179	919	1950	30472	organelle lumen	AT1G44900|AT3G11964|AT1G10570|AT3G54610|AT3G07980|AT3G49660|AT4G05410|AT4G08920|AT3G56990|AT5G23570|AT5G63110|AT2G15430|AT3G56350|AT2G18790|AT1G25540|AT1G20090|AT1G03910|AT5G64960|AT5G37055|AT1G02140|AT5G13480|AT1G06220|AT1G02780|AT3G10920|AT4G01560|AT5G42020|AT1G32230|AT1G09570|AT5G50320|AT5G16750|AT4G10710|AT2G37630|AT5G43070|AT1G48380|AT1G49590|AT2G18020|AT3G15010|AT5G12840|AT3G12380|AT3G44110…
70013	5.0564e-42	1.1998e-40	179	919	1950	30472	intracellular organelle lumen	AT1G44900|AT3G11964|AT1G10570|AT3G54610|AT3G07980|AT3G49660|AT4G05410|AT4G08920|AT3G56990|AT5G23570|AT5G63110|AT2G15430|AT3G56350|AT2G18790|AT1G25540|AT1G20090|AT1G03910|AT5G64960|AT5G37055|AT1G02140|AT5G13480|AT1G06220|AT1G02780|AT3G10920|AT4G01560|AT5G42020|AT1G32230|AT1G09570|AT5G50320|AT5G16750|AT4G10710|AT2G37630|AT5G43070|AT1G48380|AT1G49590|AT2G18020|AT3G15010|AT5G12840|AT3G12380|AT3G44110…
45595	2.0029e-41	4.7283e-40	56	97	1950	30472	regulation of cell differentiation	AT1G17920|AT3G06010|AT3G08550|AT3G07780|AT5G19310|AT2G31160|AT3G20840|AT2G46410|AT4G13750|AT5G02030|AT2G45160|AT1G06220|AT1G51190|AT2G20140|AT4G24540|AT2G03060|AT1G56260|AT4G11920|AT5G63780|AT4G28980|AT5G48160|AT5G44280|AT4G00150|AT3G61150|AT4G29040|AT1G70560|AT3G07160|AT4G32880|AT1G08030|AT3G60630|AT1G18750|AT5G23150|AT5G10510|AT4G24670|AT4G38430|AT2G22540|AT5G55300|AT5G65510|AT3G11260|AT1G05230…
48609	2.6907e-41	6.3197e-40	63	126	1950	30472	reproductive process in a multicellular organism	AT4G24210|AT1G64110|AT4G19180|AT3G54650|AT5G63110|AT4G28370|AT1G30100|AT1G48270|AT4G29860|AT4G32551|AT1G07430|AT5G58070|AT2G44950|AT3G11440|AT1G54060|AT2G20140|AT1G55250|AT2G06510|AT5G24330|AT5G66730|AT2G38560|AT5G53470|AT3G63210|AT4G29040|AT3G44750|AT3G47860|AT2G32700|AT2G41850|AT4G32320|AT3G07160|AT2G27840|AT5G13170|AT4G25640|AT4G31400|AT2G41500|AT5G40010|AT5G57800|AT4G02280|AT5G62000|AT1G17420…
31974	3.3423e-41	7.8105e-40	180	940	1950	30472	membrane-enclosed lumen	AT1G44900|AT3G11964|AT1G10570|AT3G54610|AT3G07980|AT3G49660|AT4G05410|AT4G08920|AT3G56990|AT5G23570|AT5G63110|AT2G15430|AT3G56350|AT2G18790|AT1G25540|AT1G20090|AT1G03910|AT5G64960|AT5G37055|AT1G02140|AT5G13480|AT1G06220|AT1G02780|AT3G10920|AT4G01560|AT5G42020|AT1G32230|AT1G09570|AT5G50320|AT5G16750|AT4G10710|AT2G37630|AT5G43070|AT1G48380|AT1G49590|AT2G18020|AT3G15010|AT5G12840|AT3G12380|AT3G44110…
9892	7.9288e-41	1.8435e-39	115	430	1950	30472	negative regulation of metabolic process	AT5G17690|AT5G21150|AT5G23570|AT3G05040|AT2G30950|AT5G63110|AT5G57740|AT1G75080|AT5G13080|AT4G16780|AT1G70070|AT2G39810|AT1G15750|AT2G30280|AT1G09570|AT3G19580|AT5G47390|AT5G63980|AT2G37630|AT5G44280|AT2G42260|AT1G69770|AT4G13940|AT4G03190|AT1G01040|AT1G48410|AT5G13010|AT3G10480|AT3G47860|AT3G48430|AT1G04550|AT1G20780|AT5G42270|AT5G20320|AT1G61140|AT1G08030|AT1G13260|AT1G62990|AT1G60170|AT2G22540…
51276	9.9298e-41	2.2973e-39	108	383	1950	30472	chromosome organization	AT1G16710|AT5G17690|AT3G54610|AT3G06010|AT5G63110|AT5G49160|AT3G06930|AT3G20840|AT2G18790|AT5G08450|AT1G01690|AT1G77300|AT5G58270|AT5G37055|AT2G44950|AT2G02470|AT3G12810|AT5G14170|AT2G31650|AT1G55250|AT5G15540|AT3G52280|AT5G44280|AT2G22475|AT1G74560|AT1G69770|AT4G13940|AT5G09790|AT3G44750|AT1G79730|AT2G02760|AT3G48430|AT4G30860|AT3G60830|AT1G60170|AT3G20740|AT5G57880|AT3G54710|AT1G03770|AT4G34430…
5829	3.2071e-40	7.3827e-39	280	1922	1950	30472	cytosol	AT1G44900|AT5G46210|AT1G09100|AT5G23570|AT4G04040|AT3G05840|AT2G15790|AT3G06930|AT4G35460|AT1G71040|AT1G76850|AT5G37850|AT1G50460|AT5G05340|AT2G27530|AT2G02470|AT1G75080|AT4G14880|AT4G24220|AT1G64520|AT4G01560|AT3G56640|AT3G04400|AT3G57290|AT2G18020|AT5G37600|AT1G74560|AT5G58440|AT2G21660|AT1G13180|AT1G36160|AT1G54490|AT1G01960|AT4G38740|AT3G55400|AT1G10670|AT4G00100|AT3G02230|AT5G45940|AT3G27530…
9933	1.478e-39	3.3855e-38	38	44	1950	30472	meristem structural organization	AT1G55580|AT5G16780|AT2G34710|AT1G56010|AT3G07780|AT5G27030|AT3G05840|AT3G44600|AT3G15880|AT3G18730|AT2G20000|AT5G55540|AT5G55300|AT3G13300|AT3G16830|AT1G13870|AT1G11130|AT1G80490|AT1G15750|AT1G20700|AT1G30490|AT5G26751|AT5G51430|AT4G32700|AT5G53950|AT5G60690|AT5G48160|AT2G35350|AT2G34780|AT1G72560|AT4G29040|AT5G64630|AT1G28560|AT5G13570|AT1G52150|AT1G36160|AT5G46700|AT4G32880
6325	2.9749e-39	6.7808e-38	89	273	1950	30472	chromatin organization	AT1G16710|AT3G09600|AT5G17690|AT3G54610|AT3G06010|AT1G61040|AT3G24440|AT5G19310|AT5G63110|AT5G18620|AT5G49160|AT3G06930|AT2G18790|AT2G47620|AT5G08450|AT3G10390|AT1G77300|AT5G37055|AT5G45600|AT1G21700|AT1G79000|AT2G44950|AT5G39550|AT2G02470|AT3G12810|AT4G39100|AT5G58230|AT1G04400|AT1G20900|AT2G36740|AT5G14170|AT4G29830|AT2G31650|AT1G55250|AT1G66740|AT5G24330|AT3G52280|AT5G44280|AT2G22475|AT1G74560…
48863	3.0316e-39	6.8762e-38	42	55	1950	30472	stem cell differentiation	AT5G23630|AT3G06010|AT3G08550|AT3G07780|AT1G08030|AT5G19310|AT3G60630|AT2G31160|AT5G10510|AT4G24670|AT3G20840|AT2G22540|AT4G13750|AT5G55300|AT5G65510|AT3G11260|AT5G02030|AT1G04020|AT2G45160|AT3G07050|AT1G03770|AT1G51190|AT2G20140|AT2G27990|AT4G24540|AT1G56260|AT1G62360|AT4G11920|AT5G63780|AT4G28980|AT5G48160|AT2G35350|AT5G44280|AT2G34780|AT4G00150|AT2G46920|AT4G29040|AT1G48410|AT1G70560|AT2G42500…
5737	1.3998e-38	3.1594e-37	1127	13299	1950	30472	cytoplasm	AT5G17690|AT4G21060|AT5G42890|AT2G30950|AT5G63110|AT2G15790|AT4G35460|AT5G02190|AT5G03280|AT1G43130|AT2G27530|AT1G79560|AT2G02470|AT5G22800|AT2G25110|AT5G40480|AT5G19620|AT1G32230|AT2G38440|AT2G17720|AT3G21640|AT4G24580|AT4G26760|AT4G37650|AT4G33050|AT4G14510|AT5G53550|AT1G78240|AT3G07360|AT1G53160|AT1G77390|AT5G50280|AT1G54490|AT1G01960|AT4G12570|AT4G38740|AT2G26670|AT3G55400|AT1G10670|AT4G00100…
48581	4.8199e-38	1.0826e-36	50	84	1950	30472	negative regulation of post-embryonic development	AT5G65050|AT5G17490|AT5G46210|AT5G17690|AT1G61040|AT3G05040|AT5G49160|AT1G77300|AT3G12810|AT4G29830|AT1G77080|AT5G65080|AT2G38560|AT5G67100|AT1G30970|AT4G26000|AT1G79730|AT2G42620|AT1G22920|AT2G46340|AT1G13260|AT5G61150|AT2G36270|AT1G66350|AT5G23150|AT1G45050|AT2G22540|AT3G19980|AT1G16060|AT4G36930|AT5G56030|AT4G22140|AT3G03450|AT1G08260|AT4G00650|AT1G79280|AT3G54720|AT3G33520|AT2G06210|AT5G22290…
48638	1.0989e-37	2.4562e-36	50	85	1950	30472	regulation of developmental growth	AT3G59900|AT1G44900|AT5G24740|AT3G07220|AT4G08920|AT3G44600|AT4G32551|AT5G37055|AT3G16857|AT1G04400|AT2G03060|AT3G49670|AT3G06020|AT5G63980|AT1G71696|AT1G69380|AT4G28190|AT2G04025|AT1G52150|AT3G07160|AT5G13290|AT3G46290|AT2G26670|AT4G20270|AT2G25180|AT1G08030|AT4G31920|AT4G24190|AT3G52770|AT1G18750|AT5G10510|AT1G13620|AT4G38430|AT2G20000|AT5G55300|AT2G25010|AT1G60420|AT5G46520|AT5G56600|AT1G70940…
45596	3.8387e-37	8.5392e-36	43	62	1950	30472	negative regulation of cell differentiation	AT1G17920|AT3G06010|AT3G08550|AT3G07780|AT1G08030|AT5G19310|AT3G60630|AT5G23150|AT2G31160|AT5G10510|AT4G24670|AT3G20840|AT2G22540|AT4G13750|AT5G55300|AT5G65510|AT3G11260|AT5G02030|AT1G05230|AT1G04020|AT2G45160|AT3G07050|AT1G03770|AT1G51190|AT2G20140|AT2G27990|AT4G24540|AT1G56260|AT1G62360|AT4G11920|AT5G63780|AT4G28980|AT5G48160|AT2G35350|AT5G44280|AT2G34780|AT4G00150|AT3G61150|AT2G46920|AT4G29040…
48864	4.4652e-37	9.8853e-36	40	53	1950	30472	stem cell development	AT3G06010|AT3G08550|AT3G07780|AT1G08030|AT5G19310|AT3G60630|AT2G31160|AT5G10510|AT4G24670|AT3G20840|AT2G22540|AT4G13750|AT5G55300|AT5G65510|AT3G11260|AT5G02030|AT1G04020|AT2G45160|AT3G07050|AT1G03770|AT1G51190|AT2G20140|AT2G27990|AT4G24540|AT1G56260|AT1G62360|AT4G11920|AT5G63780|AT4G28980|AT5G48160|AT2G35350|AT5G44280|AT2G34780|AT4G00150|AT2G46920|AT4G29040|AT1G48410|AT1G70560|AT5G43810|AT4G37750
3824	9.7605e-37	2.1506e-35	849	9272	1950	30472	catalytic activity	AT5G17690|AT4G21060|AT3G06010|AT2G30950|AT5G63110|AT3G53480|AT2G15790|AT4G35460|AT5G02190|AT1G79560|AT5G22800|AT2G25110|AT4G23250|AT1G32230|AT2G17720|AT3G21640|AT4G37890|AT1G69770|AT3G44750|AT2G41850|AT1G78240|AT3G07360|AT2G04660|AT2G02480|AT3G63290|AT1G54490|AT4G12570|AT4G38740|AT2G26670|AT3G55400|AT1G10670|AT5G45940|AT1G09000|AT5G40010|AT1G80340|AT1G67120|AT5G63370|AT5G49070|AT3G44540|AT3G43210…
10311	1.1205e-36	2.4571e-35	34	38	1950	30472	lateral root formation	AT1G13980|AT1G55020|AT4G37070|AT3G59420|AT4G07410|AT3G22400|AT3G53180|AT1G49430|AT1G25220|AT2G45420|AT2G23430|AT5G09680|AT4G13510|AT5G57740|AT1G77740|AT3G05090|AT2G42430|AT1G18800|AT4G35910|AT1G15570|AT3G02260|AT2G38120|AT1G74560|AT4G29040|AT1G19220|AT3G62980|AT1G28560|AT1G21410|AT5G05730|AT1G77690|AT1G07880|AT5G20730|AT2G22670|AT5G56580
48481	1.6168e-36	3.5288e-35	40	54	1950	30472	ovule development	AT3G55400|AT4G25520|AT5G16560|AT5G21150|AT2G34710|AT3G55220|AT3G55200|AT1G17560|AT5G62000|AT1G68990|AT4G29860|AT1G19270|AT1G52880|AT1G77300|AT5G05560|AT5G42630|AT1G43850|AT1G51170|AT1G75080|AT1G11130|AT5G62090|AT1G30490|AT5G52520|AT3G58780|AT5G23260|AT4G21530|AT1G11870|AT5G64050|AT5G49030|AT2G43790|AT5G60410|AT3G13490|AT3G45640|AT2G25840|AT1G25350|AT5G41410|AT1G52150|AT4G36920|AT4G17300|AT3G15510
31324	1.6245e-36	3.529e-35	85	268	1950	30472	negative regulation of cellular metabolic process	AT5G17690|AT2G30950|AT5G05660|AT5G57740|AT5G02030|AT5G13680|AT4G32551|AT1G20330|AT1G75080|AT4G39100|AT5G13080|AT4G16780|AT2G39810|AT1G15750|AT2G30280|AT1G09570|AT1G33240|AT3G19580|AT5G47390|AT5G63980|AT4G21670|AT2G37630|AT5G67100|AT5G44280|AT2G42260|AT3G20910|AT1G69770|AT1G50250|AT4G13940|AT4G03190|AT3G10480|AT3G47860|AT2G32700|AT3G48430|AT1G04550|AT1G20780|AT2G22670|AT4G14550|AT5G42270|AT3G57860…
48583	2.2928e-36	4.9574e-35	101	374	1950	30472	regulation of response to stimulus	AT4G24210|AT5G46210|AT5G23570|AT3G52430|AT4G03110|AT1G48270|AT3G51060|AT4G29860|AT2G18790|AT1G25540|AT5G03280|AT1G77300|AT1G07430|AT5G08335|AT5G13080|AT2G25110|AT5G65080|AT5G62090|AT5G23320|AT5G50320|AT5G66730|AT2G37630|AT4G26000|AT2G32460|AT4G08480|AT3G47620|AT4G23810|AT2G33835|AT1G01720|AT2G46340|AT1G17980|AT1G13300|AT1G22770|AT3G11220|AT3G03450|AT1G08260|AT1G67890|AT5G24590|AT1G14920|AT3G57390…
19827	5.3673e-36	1.1551e-34	39	52	1950	30472	stem cell maintenance	AT3G06010|AT3G08550|AT3G07780|AT1G08030|AT5G19310|AT3G60630|AT2G31160|AT5G10510|AT4G24670|AT3G20840|AT2G22540|AT4G13750|AT5G55300|AT5G65510|AT3G11260|AT5G02030|AT1G04020|AT2G45160|AT3G07050|AT1G03770|AT1G51190|AT2G20140|AT2G27990|AT4G24540|AT1G56260|AT1G62360|AT4G11920|AT5G63780|AT4G28980|AT5G48160|AT2G35350|AT5G44280|AT2G34780|AT4G00150|AT2G46920|AT4G29040|AT1G70560|AT5G43810|AT4G37750
48443	9.6495e-36	2.0575e-34	48	83	1950	30472	stamen development	AT4G25640|AT3G02130|AT3G07220|AT4G31400|AT4G24972|AT4G15180|AT3G28860|AT4G19180|AT2G36910|AT5G53400|AT1G17420|AT4G39400|AT5G56450|AT3G44600|AT3G15540|AT2G02970|AT1G77300|AT3G48520|AT2G02850|AT5G50570|AT5G50670|AT4G38630|AT1G79280|AT3G02000|AT3G49670|AT1G15330|AT5G24330|AT3G22990|AT1G12820|AT2G35270|AT5G07280|AT5G43270|AT3G26810|AT1G14720|AT5G05690|AT1G47260|AT5G65700|AT4G38680|AT4G03190|AT4G36380…
48466	9.6495e-36	2.0575e-34	48	83	1950	30472	androecium development	AT4G25640|AT3G02130|AT3G07220|AT4G31400|AT4G24972|AT4G15180|AT3G28860|AT4G19180|AT2G36910|AT5G53400|AT1G17420|AT4G39400|AT5G56450|AT3G44600|AT3G15540|AT2G02970|AT1G77300|AT3G48520|AT2G02850|AT5G50570|AT5G50670|AT4G38630|AT1G79280|AT3G02000|AT3G49670|AT1G15330|AT5G24330|AT3G22990|AT1G12820|AT2G35270|AT5G07280|AT5G43270|AT3G26810|AT1G14720|AT5G05690|AT1G47260|AT5G65700|AT4G38680|AT4G03190|AT4G36380…
10605	1.2834e-35	2.7241e-34	103	395	1950	30472	negative regulation of macromolecule metabolic process	AT5G17690|AT5G21150|AT5G23570|AT3G05040|AT5G63110|AT1G75080|AT5G13080|AT4G16780|AT1G70070|AT2G39810|AT1G15750|AT2G30280|AT1G09570|AT3G19580|AT5G47390|AT5G63980|AT2G37630|AT5G44280|AT2G42260|AT1G69770|AT4G13940|AT4G03190|AT1G01040|AT1G48410|AT5G13010|AT3G10480|AT3G48430|AT1G04550|AT5G20320|AT1G61140|AT1G13260|AT1G62990|AT1G60170|AT2G22540|AT2G46830|AT2G18290|AT1G03770|AT5G13180|AT2G10606|AT4G28840…
9893	1.6342e-35	3.4527e-34	91	314	1950	30472	positive regulation of metabolic process	AT3G08510|AT2G26170|AT5G47220|AT3G54610|AT1G09100|AT1G61040|AT3G24440|AT1G27370|AT4G40060|AT1G73500|AT3G51060|AT1G25540|AT5G62940|AT5G61730|AT5G05660|AT4G22910|AT1G77300|AT5G04410|AT5G11260|AT1G02140|AT1G09530|AT3G11440|AT1G77180|AT2G20140|AT2G37678|AT3G05530|AT4G27410|AT4G24540|AT1G33280|AT1G32310|AT4G11920|AT1G28470|AT5G44160|AT3G21200|AT4G02450|AT2G32460|AT4G17500|AT5G61600|AT4G19600|AT4G29040…
166	1.8624e-35	3.917e-34	399	3392	1950	30472	nucleotide binding	AT1G09100|AT3G06010|AT4G29900|AT2G30950|AT3G53480|AT5G45800|AT1G79560|AT3G12810|AT5G22800|AT1G54130|AT2G02480|AT3G55400|AT1G10670|AT1G09000|AT5G40010|AT3G09660|AT2G14120|AT1G67120|AT5G63370|AT5G64580|AT3G18130|AT3G43210|AT1G48920|AT2G47000|AT1G01510|AT4G00330|AT4G29810|AT1G08260|AT4G26300|AT4G27630|AT1G09230|AT3G56860|AT2G37690|AT4G14850|AT1G21690|AT5G09810|AT1G10130|AT5G41480|AT4G19180|AT5G18620…
9737	3.0672e-35	6.4216e-34	120	525	1950	30472	response to abscisic acid stimulus	AT2G39800|AT5G46210|AT1G64990|AT3G08550|AT5G63110|AT4G02380|AT1G48270|AT2G36890|AT5G08450|AT5G63510|AT1G27320|AT2G38280|AT3G01090|AT3G48680|AT5G52050|AT1G12240|AT3G55830|AT3G19580|AT5G47390|AT5G63980|AT3G63210|AT3G47620|AT3G47860|AT3G07360|AT5G58560|AT2G35940|AT1G55020|AT1G34120|AT5G40010|AT1G31930|AT3G53180|AT1G69270|AT2G46830|AT5G39610|AT4G17615|AT3G18130|AT2G25930|AT4G34710|AT5G44610|AT3G11220…
6970	1.6604e-33	3.4607e-32	126	594	1950	30472	response to osmotic stress	AT2G39800|AT1G10570|AT3G06010|AT5G49720|AT5G63110|AT1G73500|AT5G03280|AT3G61140|AT5G63510|AT1G27320|AT5G37850|AT1G50460|AT3G48680|AT3G10920|AT3G04120|AT1G32230|AT3G19580|AT5G47390|AT5G63980|AT2G37630|AT3G23940|AT3G57290|AT2G01830|AT2G21660|AT3G44110|AT5G01270|AT1G21750|AT3G02230|AT5G40010|AT5G17310|AT5G40770|AT4G24190|AT3G25230|AT5G15650|AT4G08500|AT1G69270|AT5G55580|AT2G46830|AT3G44540|AT5G39610…
6464	2.4863e-33	5.1587e-32	287	2175	1950	30472	protein modification process	AT4G24210|AT5G46210|AT1G10570|AT4G21060|AT5G22000|AT5G63110|AT4G28370|AT3G05840|AT2G15790|AT3G06930|AT2G01820|AT1G75640|AT5G45800|AT4G23250|AT2G35610|AT3G49670|AT1G55250|AT5G21140|AT5G23320|AT4G35910|AT1G09570|AT4G11920|AT2G17720|AT5G14850|AT3G21640|AT5G44280|AT2G01830|AT1G69770|AT3G61790|AT4G03190|AT2G01950|AT1G51660|AT3G07360|AT3G48430|AT3G53810|AT3G45040|AT2G04660|AT1G08910|AT4G12570|AT4G38740…
9651	1.8104e-32	3.7395e-31	117	535	1950	30472	response to salt stress	AT2G39800|AT1G10570|AT3G06010|AT5G49720|AT5G63110|AT1G73500|AT5G03280|AT3G61140|AT5G63510|AT1G27320|AT5G37850|AT1G50460|AT3G48680|AT3G10920|AT3G04120|AT1G32230|AT3G19580|AT5G47390|AT5G63980|AT2G37630|AT3G23940|AT3G57290|AT2G21660|AT3G44110|AT1G21750|AT3G02230|AT5G40010|AT5G17310|AT5G40770|AT4G24190|AT5G15650|AT4G08500|AT1G69270|AT5G55580|AT2G46830|AT3G44540|AT5G39610|AT3G16470|AT4G17615|AT4G34710…
48508	8.059e-32	1.6573e-30	29	32	1950	30472	embryonic meristem development	AT1G08590|AT3G02130|AT2G34710|AT1G56010|AT3G07780|AT4G28650|AT5G27030|AT1G69270|AT5G62940|AT3G15880|AT1G46480|AT2G20000|AT2G20300|AT3G13300|AT4G13195|AT3G16830|AT1G11130|AT1G80490|AT1G15750|AT1G20700|AT1G30490|AT1G05470|AT3G24770|AT5G53950|AT5G61480|AT5G48160|AT5G13570|AT1G36160|AT4G32880
31325	3.9567e-31	8.1007e-30	83	298	1950	30472	positive regulation of cellular metabolic process	AT3G08510|AT2G26170|AT5G47220|AT3G54610|AT1G09100|AT1G61040|AT3G24440|AT1G27370|AT4G40060|AT1G73500|AT3G51060|AT1G25540|AT5G62940|AT5G61730|AT5G05660|AT4G22910|AT1G77300|AT5G04410|AT5G11260|AT1G09530|AT3G11440|AT1G77180|AT2G20140|AT2G37678|AT3G05530|AT4G27410|AT4G24540|AT1G33280|AT4G11920|AT1G28470|AT5G44160|AT3G21200|AT2G32460|AT4G17500|AT5G61600|AT4G19600|AT4G29040|AT5G01270|AT4G23810|AT5G13010…
5524	5.4987e-31	1.1208e-29	294	2322	1950	30472	ATP binding	AT1G44900|AT1G09100|AT3G06010|AT4G29900|AT2G30950|AT4G04040|AT3G53480|AT3G05840|AT2G01820|AT5G37850|AT1G50460|AT1G75640|AT5G45800|AT1G79560|AT3G12810|AT5G22800|AT1G70070|AT3G05970|AT3G49670|AT5G37600|AT2G01950|AT1G01040|AT1G51660|AT1G13180|AT4G30340|AT1G54130|AT3G53810|AT1G36160|AT2G02480|AT3G55400|AT1G10670|AT1G09000|AT1G61140|AT5G40010|AT3G28860|AT2G36910|AT3G09660|AT4G23940|AT1G16890|AT1G67120…
32553	6.4322e-31	1.2996e-29	323	2655	1950	30472	ribonucleotide binding	AT1G44900|AT1G09100|AT3G06010|AT1G64990|AT4G29900|AT2G30950|AT4G04040|AT3G53480|AT3G05840|AT2G01820|AT2G18390|AT5G37850|AT1G50460|AT1G75640|AT5G45800|AT1G79560|AT3G12810|AT5G22800|AT1G70070|AT3G05970|AT3G49670|AT5G37600|AT2G22870|AT2G01950|AT1G01040|AT1G51660|AT1G13180|AT4G30340|AT1G54130|AT3G53810|AT1G36160|AT2G02480|AT5G47200|AT3G55400|AT1G10670|AT1G09000|AT1G61140|AT5G40010|AT3G28860|AT2G36910…
32555	6.4322e-31	1.2996e-29	323	2655	1950	30472	purine ribonucleotide binding	AT1G44900|AT1G09100|AT3G06010|AT1G64990|AT4G29900|AT2G30950|AT4G04040|AT3G53480|AT3G05840|AT2G01820|AT2G18390|AT5G37850|AT1G50460|AT1G75640|AT5G45800|AT1G79560|AT3G12810|AT5G22800|AT1G70070|AT3G05970|AT3G49670|AT5G37600|AT2G22870|AT2G01950|AT1G01040|AT1G51660|AT1G13180|AT4G30340|AT1G54130|AT3G53810|AT1G36160|AT2G02480|AT5G47200|AT3G55400|AT1G10670|AT1G09000|AT1G61140|AT5G40010|AT3G28860|AT2G36910…
9723	8.6563e-31	1.7414e-29	83	301	1950	30472	response to ethylene stimulus	AT3G59900|AT5G17490|AT3G09600|AT5G47220|AT3G52430|AT4G02380|AT1G73500|AT3G20840|AT2G19560|AT1G25220|AT5G03280|AT5G60120|AT3G11440|AT1G05850|AT1G51190|AT3G50060|AT1G68765|AT5G67180|AT1G32230|AT3G51550|AT1G66340|AT5G47390|AT3G61630|AT2G38120|AT4G02570|AT2G43790|AT4G34460|AT4G17500|AT3G62680|AT5G61600|AT5G35220|AT1G70560|AT5G57390|AT1G54490|AT4G11280|AT5G20730|AT3G15730|AT5G18560|AT5G24520|AT2G28290…
10817	8.8067e-31	1.764e-29	74	242	1950	30472	regulation of hormone levels	AT2G26170|AT2G33860|AT4G08920|AT4G31500|AT4G31820|AT4G05530|AT3G53480|AT1G16510|AT1G75520|AT3G22942|AT1G25220|AT5G03280|AT2G45400|AT4G13750|AT1G19790|AT3G63440|AT2G01420|AT5G05860|AT3G10870|AT3G05290|AT4G31910|AT3G50660|AT5G27520|AT3G02260|AT1G66340|AT2G38120|AT1G19630|AT5G48000|AT4G14430|AT1G48410|AT2G20610|AT5G63420|AT1G70560|AT2G42620|AT1G05680|AT1G73590|AT1G13980|AT2G34650|AT5G45340|AT1G05160…
9735	9.6312e-31	1.9208e-29	73	236	1950	30472	response to cytokinin stimulus	AT1G05180|AT5G42890|AT3G54010|AT5G49720|AT2G30950|AT5G46290|AT1G48270|AT5G03280|AT3G46740|AT1G78630|AT1G27320|AT5G35750|AT3G16857|AT5G58070|AT1G74030|AT1G05850|AT4G16780|AT1G64520|AT5G42020|AT3G61630|AT3G25520|AT1G67030|AT1G68360|AT1G69690|AT2G01830|AT2G21660|AT3G47620|AT1G78240|AT1G79530|AT3G48990|AT1G36160|AT2G43750|AT1G21750|AT4G38740|AT1G10470|AT5G01600|AT5G42270|AT2G25180|AT4G31920|AT3G25230…
10075	9.7809e-31	1.9423e-29	32	41	1950	30472	regulation of meristem growth	AT4G20270|AT1G44900|AT5G24740|AT4G08920|AT2G25180|AT1G08030|AT4G31920|AT4G24190|AT3G52770|AT5G10510|AT1G13620|AT3G44600|AT5G55300|AT3G16857|AT1G04400|AT2G25010|AT3G49670|AT3G06020|AT5G46520|AT1G70940|AT1G71696|AT1G69380|AT5G65700|AT3G15150|AT4G28190|AT5G03150|AT2G04025|AT1G52150|AT5G60810|AT5G13290|AT2G26670|AT4G16110
43412	1.0871e-30	2.1496e-29	300	2399	1950	30472	macromolecule modification	AT4G24210|AT5G46210|AT1G10570|AT4G21060|AT5G22000|AT5G63110|AT4G28370|AT5G49160|AT3G05840|AT2G15790|AT3G06930|AT2G01820|AT1G75640|AT5G45800|AT5G22800|AT4G23250|AT2G35610|AT2G30280|AT3G49670|AT1G55250|AT5G21140|AT5G23320|AT4G35910|AT1G09570|AT4G11920|AT2G17720|AT5G14850|AT3G21640|AT5G44280|AT2G01830|AT1G69770|AT3G61790|AT4G03190|AT2G01950|AT1G51660|AT3G07360|AT3G48430|AT3G53810|AT3G45040|AT2G04660…
17076	2.7977e-30	5.5085e-29	332	2781	1950	30472	purine nucleotide binding	AT1G44900|AT1G09100|AT3G06010|AT1G64990|AT4G29900|AT2G30950|AT4G04040|AT3G53480|AT3G06810|AT3G05840|AT2G01820|AT2G18390|AT5G37850|AT1G50460|AT1G75640|AT5G45800|AT1G79560|AT3G12810|AT5G22800|AT1G70070|AT3G05970|AT3G49670|AT5G37600|AT2G22870|AT2G01950|AT1G01040|AT1G51660|AT1G13180|AT4G30340|AT1G54130|AT3G53810|AT1G36160|AT2G02480|AT5G47200|AT3G55400|AT1G10670|AT1G09000|AT1G61140|AT5G40010|AT3G28860…
9846	4.3189e-30	8.4677e-29	37	58	1950	30472	pollen germination	AT5G23630|AT3G02130|AT3G09840|AT3G55220|AT3G55200|AT1G71820|AT5G48230|AT3G54150|AT4G35460|AT5G65930|AT1G76850|AT2G03120|AT1G05630|AT5G53180|AT4G35540|AT3G01150|AT5G17020|AT3G03110|AT1G08660|AT3G07130|AT3G56960|AT3G56640|AT1G34350|AT1G64980|AT2G17420|AT5G35700|AT4G02350|AT4G24580|AT2G39990|AT1G02410|AT1G21170|AT2G19690|AT5G07370|AT3G10380|AT4G29380|AT2G41210|AT3G07160
8283	9.2313e-30	1.8022e-28	35	52	1950	30472	cell proliferation	AT3G49780|AT5G65870|AT5G55920|AT2G22860|AT2G18290|AT5G28640|AT5G13680|AT3G11220|AT5G58230|AT4G16780|AT2G10606|AT5G45550|AT1G18800|AT3G33520|AT1G80370|AT2G25170|AT1G15570|AT1G13590|AT5G50320|AT4G00850|AT1G17110|AT3G25520|AT1G65470|AT3G44735|AT4G26760|AT4G24560|AT1G69690|AT5G55230|AT1G74560|AT3G16640|AT3G47620|AT5G64630|AT1G01160|AT5G39740|AT4G17980
10604	1.56e-29	3.0327e-28	79	285	1950	30472	positive regulation of macromolecule metabolic process	AT5G47220|AT3G54610|AT1G09100|AT1G61040|AT3G24440|AT1G27370|AT4G40060|AT1G73500|AT3G51060|AT1G25540|AT5G62940|AT5G05660|AT4G22910|AT1G77300|AT5G04410|AT1G02140|AT3G11440|AT1G77180|AT2G20140|AT2G37678|AT3G05530|AT4G27410|AT4G24540|AT1G33280|AT1G32310|AT4G11920|AT1G28470|AT5G44160|AT4G02450|AT2G32460|AT4G17500|AT5G61600|AT4G19600|AT4G29040|AT5G01270|AT4G23810|AT5G13010|AT2G32700|AT2G04025|AT1G34180…
22402	1.5875e-29	3.0734e-28	76	265	1950	30472	cell cycle process	AT1G05180|AT1G11060|AT3G23670|AT3G54650|AT5G18700|AT4G02460|AT5G49160|AT1G49040|AT4G01370|AT4G09140|AT3G63480|AT1G01690|AT4G22910|AT1G71440|AT5G05620|AT1G06660|AT5G48720|AT5G48600|AT2G06510|AT5G15540|AT4G11920|AT4G05440|AT3G60740|AT3G59550|AT2G34680|AT1G48380|AT4G26760|AT3G54180|AT2G42260|AT1G69690|AT1G69770|AT1G47200|AT1G01040|AT3G19770|AT3G48750|AT4G14150|AT2G04660|AT3G07160|AT1G77390|AT5G56580…
10629	2.0006e-29	3.857e-28	88	349	1950	30472	negative regulation of gene expression	AT5G17690|AT5G21150|AT5G23570|AT3G05040|AT3G24440|AT5G63110|AT3G49500|AT1G69440|AT5G05660|AT3G17185|AT5G02030|AT4G32551|AT1G75080|AT4G39100|AT5G13080|AT4G16780|AT1G70070|AT4G31877|AT2G39810|AT1G15750|AT2G30280|AT5G23880|AT3G19580|AT4G37180|AT5G47390|AT5G63980|AT2G39175|AT4G21670|AT2G37630|AT5G44280|AT5G23080|AT3G20910|AT1G69770|AT4G13940|AT4G03190|AT1G01040|AT1G48410|AT5G13010|AT3G10480|AT2G32700…
22607	2.4969e-29	4.7939e-28	115	560	1950	30472	cellular component assembly	AT3G08950|AT1G15220|AT3G23670|AT3G08550|AT5G18700|AT3G57280|AT3G29810|AT3G09090|AT2G22640|AT3G61140|AT1G01690|AT2G18390|AT1G76850|AT1G71440|AT5G05620|AT1G27600|AT1G64520|AT4G01560|AT5G15540|AT3G60740|AT5G65000|AT3G57290|AT1G74560|AT2G22870|AT5G11110|AT5G39740|AT4G14110|AT1G04950|AT5G17290|AT1G15440|AT4G01710|AT1G67120|AT3G54150|AT1G33430|AT5G63370|AT3G19190|AT1G60170|AT5G47040|AT2G36990|AT5G57880…
51172	2.8492e-29	5.4477e-28	69	222	1950	30472	negative regulation of nitrogen compound metabolic process	AT5G17690|AT5G05660|AT5G57740|AT5G02030|AT4G32551|AT1G20330|AT1G75080|AT4G39100|AT5G13080|AT4G16780|AT2G39810|AT1G15750|AT2G30280|AT1G33240|AT3G19580|AT5G47390|AT5G63980|AT4G21670|AT2G37630|AT5G67100|AT5G44280|AT3G20910|AT1G69770|AT4G13940|AT4G03190|AT3G10480|AT2G32700|AT1G04550|AT2G22670|AT4G14550|AT1G61140|AT1G08030|AT1G13260|AT1G62990|AT5G62000|AT1G60170|AT2G22540|AT2G46830|AT2G18290|AT1G04020…
44085	3.0198e-29	5.7501e-28	167	1029	1950	30472	cellular component biogenesis	AT3G08950|AT3G11964|AT1G15220|AT4G05410|AT3G23670|AT3G08550|AT5G18700|AT1G19300|AT3G57280|AT3G29810|AT3G01640|AT3G09090|AT2G22640|AT3G61140|AT1G01690|AT1G16280|AT2G18390|AT1G76850|AT1G71440|AT5G05620|AT1G02780|AT2G25110|AT1G27600|AT2G35610|AT1G64520|AT4G01560|AT1G33280|AT5G15540|AT5G16750|AT3G60740|AT5G65000|AT1G31660|AT3G57290|AT5G16910|AT1G74560|AT2G22870|AT5G11110|AT5G39740|AT3G13870|AT4G14110…
42180	3.3188e-29	6.2936e-28	162	982	1950	30472	cellular ketone metabolic process	AT2G39800|AT2G34630|AT5G42890|AT5G23570|AT5G46290|AT1G30100|AT4G05530|AT1G73500|AT3G06810|AT1G48270|AT2G18790|AT5G05980|AT1G69640|AT1G05010|AT3G10870|AT3G01090|AT3G05290|AT4G14880|AT1G80600|AT5G22800|AT3G06300|AT3G05970|AT3G04120|AT1G35580|AT5G27520|AT2G17720|AT2G35690|AT3G23940|AT5G37600|AT3G15010|AT4G37770|AT1G19440|AT2G20610|AT1G74960|AT1G07420|AT1G36160|AT2G43750|AT2G30490|AT3G55400|AT1G10670…
43228	3.7538e-29	7.0604e-28	211	1472	1950	30472	non-membrane-bounded organelle	AT1G44900|AT3G11964|AT5G17690|AT3G56990|AT5G23570|AT5G63110|AT2G15430|AT3G04630|AT2G22640|AT2G27530|AT5G37055|AT1G02140|AT4G01560|AT5G21140|AT2G38440|AT4G10710|AT4G29350|AT3G04400|AT1G48380|AT4G26760|AT2G18020|AT5G37600|AT3G12380|AT3G44750|AT4G27060|AT1G13180|AT2G04660|AT2G02480|AT4G00100|AT3G02230|AT1G15440|AT4G22970|AT1G31810|AT3G16630|AT2G20000|AT1G31817|AT3G18130|AT3G43210|AT1G48920|AT5G44610…
43232	3.7538e-29	7.0604e-28	211	1472	1950	30472	intracellular non-membrane-bounded organelle	AT1G44900|AT3G11964|AT5G17690|AT3G56990|AT5G23570|AT5G63110|AT2G15430|AT3G04630|AT2G22640|AT2G27530|AT5G37055|AT1G02140|AT4G01560|AT5G21140|AT2G38440|AT4G10710|AT4G29350|AT3G04400|AT1G48380|AT4G26760|AT2G18020|AT5G37600|AT3G12380|AT3G44750|AT4G27060|AT1G13180|AT2G04660|AT2G02480|AT4G00100|AT3G02230|AT1G15440|AT4G22970|AT1G31810|AT3G16630|AT2G20000|AT1G31817|AT3G18130|AT3G43210|AT1G48920|AT5G44610…
9910	4.3836e-29	8.2116e-28	33	47	1950	30472	negative regulation of flower development	AT5G65050|AT5G17690|AT1G61040|AT3G05040|AT1G13260|AT5G61150|AT5G23150|AT5G49160|AT1G45050|AT2G22540|AT3G19980|AT1G77300|AT3G12810|AT4G00650|AT1G79280|AT4G29830|AT1G77080|AT3G54720|AT5G65080|AT3G33520|AT2G06210|AT2G38560|AT5G22290|AT3G57390|AT5G67100|AT1G30970|AT1G14400|AT5G60410|AT5G11530|AT4G20400|AT1G79730|AT5G13790|AT5G51230
10074	4.6632e-29	8.7002e-28	31	41	1950	30472	maintenance of meristem identity	AT3G06010|AT3G08550|AT3G07780|AT5G19310|AT3G60630|AT2G31160|AT5G10510|AT4G24670|AT2G22540|AT5G65510|AT3G11260|AT5G02030|AT1G04020|AT2G45160|AT3G07050|AT1G03770|AT2G20140|AT2G27990|AT4G24540|AT4G11920|AT5G63780|AT4G28980|AT5G48160|AT2G35350|AT5G44280|AT2G34780|AT4G00150|AT2G46920|AT4G29040|AT1G70560|AT4G37750
32559	8.4313e-29	1.5667e-27	294	2391	1950	30472	adenyl ribonucleotide binding	AT1G44900|AT1G09100|AT3G06010|AT4G29900|AT2G30950|AT4G04040|AT3G53480|AT3G05840|AT2G01820|AT5G37850|AT1G50460|AT1G75640|AT5G45800|AT1G79560|AT3G12810|AT5G22800|AT1G70070|AT3G05970|AT3G49670|AT5G37600|AT2G01950|AT1G01040|AT1G51660|AT1G13180|AT4G30340|AT1G54130|AT3G53810|AT1G36160|AT2G02480|AT3G55400|AT1G10670|AT1G09000|AT1G61140|AT5G40010|AT3G28860|AT2G36910|AT3G09660|AT4G23940|AT1G16890|AT1G67120…
1882	1.5173e-28	2.8082e-27	305	2526	1950	30472	nucleoside binding	AT1G44900|AT1G09100|AT3G06010|AT4G29900|AT2G30950|AT4G04040|AT3G53480|AT3G06810|AT3G05840|AT2G01820|AT5G37850|AT1G50460|AT1G75640|AT5G45800|AT1G79560|AT3G12810|AT5G22800|AT1G70070|AT3G05970|AT3G49670|AT5G37600|AT2G01950|AT1G01040|AT1G51660|AT1G13180|AT4G30340|AT1G54130|AT3G53810|AT1G36160|AT2G02480|AT3G55400|AT1G10670|AT1G09000|AT1G61140|AT5G40010|AT3G28860|AT2G36910|AT3G09660|AT4G23940|AT1G16890…
43436	1.9626e-28	3.6036e-27	158	959	1950	30472	oxoacid metabolic process	AT2G39800|AT5G42890|AT5G23570|AT5G46290|AT1G30100|AT4G05530|AT1G73500|AT3G06810|AT1G48270|AT2G18790|AT5G05980|AT1G69640|AT1G05010|AT3G10870|AT3G01090|AT3G05290|AT4G14880|AT1G80600|AT5G22800|AT3G06300|AT3G05970|AT3G04120|AT1G35580|AT5G27520|AT2G17720|AT2G35690|AT3G23940|AT5G37600|AT3G15010|AT4G37770|AT1G19440|AT2G20610|AT1G74960|AT1G07420|AT1G36160|AT2G43750|AT3G55400|AT1G10670|AT1G05160|AT1G55020…
19752	1.9626e-28	3.6036e-27	158	959	1950	30472	carboxylic acid metabolic process	AT2G39800|AT5G42890|AT5G23570|AT5G46290|AT1G30100|AT4G05530|AT1G73500|AT3G06810|AT1G48270|AT2G18790|AT5G05980|AT1G69640|AT1G05010|AT3G10870|AT3G01090|AT3G05290|AT4G14880|AT1G80600|AT5G22800|AT3G06300|AT3G05970|AT3G04120|AT1G35580|AT5G27520|AT2G17720|AT2G35690|AT3G23940|AT5G37600|AT3G15010|AT4G37770|AT1G19440|AT2G20610|AT1G74960|AT1G07420|AT1G36160|AT2G43750|AT3G55400|AT1G10670|AT1G05160|AT1G55020…
6082	2.7928e-28	5.1076e-27	158	962	1950	30472	organic acid metabolic process	AT2G39800|AT5G42890|AT5G23570|AT5G46290|AT1G30100|AT4G05530|AT1G73500|AT3G06810|AT1G48270|AT2G18790|AT5G05980|AT1G69640|AT1G05010|AT3G10870|AT3G01090|AT3G05290|AT4G14880|AT1G80600|AT5G22800|AT3G06300|AT3G05970|AT3G04120|AT1G35580|AT5G27520|AT2G17720|AT2G35690|AT3G23940|AT5G37600|AT3G15010|AT4G37770|AT1G19440|AT2G20610|AT1G74960|AT1G07420|AT1G36160|AT2G43750|AT3G55400|AT1G10670|AT1G05160|AT1G55020…
30554	3.9811e-28	7.2523e-27	303	2517	1950	30472	adenyl nucleotide binding	AT1G44900|AT1G09100|AT3G06010|AT4G29900|AT2G30950|AT4G04040|AT3G53480|AT3G06810|AT3G05840|AT2G01820|AT5G37850|AT1G50460|AT1G75640|AT5G45800|AT1G79560|AT3G12810|AT5G22800|AT1G70070|AT3G05970|AT3G49670|AT5G37600|AT2G01950|AT1G01040|AT1G51660|AT1G13180|AT4G30340|AT1G54130|AT3G53810|AT1G36160|AT2G02480|AT3G55400|AT1G10670|AT1G09000|AT1G61140|AT5G40010|AT3G28860|AT2G36910|AT3G09660|AT4G23940|AT1G16890…
9266	4.1198e-28	7.4755e-27	108	519	1950	30472	response to temperature stimulus	AT5G17690|AT3G06010|AT4G02380|AT2G18790|AT5G54470|AT5G03280|AT1G27320|AT1G50460|AT2G22240|AT3G04120|AT1G64520|AT2G39810|AT5G42020|AT5G65080|AT5G63980|AT5G16910|AT2G21660|AT3G44110|AT1G74960|AT3G47860|AT1G36160|AT1G54490|AT3G08970|AT5G40010|AT4G24190|AT3G25230|AT5G63770|AT4G08500|AT1G60170|AT1G09080|AT1G11760|AT3G20740|AT1G69270|AT2G22300|AT2G22540|AT2G46830|AT1G22770|AT3G16470|AT4G17615|AT2G25930…
31327	4.7318e-28	8.5523e-27	68	225	1950	30472	negative regulation of cellular biosynthetic process	AT5G17690|AT5G05660|AT5G57740|AT5G02030|AT4G32551|AT1G20330|AT1G75080|AT4G39100|AT5G13080|AT4G16780|AT2G39810|AT1G15750|AT2G30280|AT1G09570|AT1G33240|AT3G19580|AT5G47390|AT5G63980|AT4G21670|AT2G37630|AT5G67100|AT5G44280|AT3G20910|AT1G69770|AT4G13940|AT4G03190|AT3G10480|AT2G32700|AT1G04550|AT1G20780|AT2G22670|AT4G14550|AT1G08030|AT1G13260|AT1G62990|AT5G62000|AT1G60170|AT2G22540|AT2G46830|AT2G18290…
1883	4.8797e-28	8.7853e-27	303	2520	1950	30472	purine nucleoside binding	AT1G44900|AT1G09100|AT3G06010|AT4G29900|AT2G30950|AT4G04040|AT3G53480|AT3G06810|AT3G05840|AT2G01820|AT5G37850|AT1G50460|AT1G75640|AT5G45800|AT1G79560|AT3G12810|AT5G22800|AT1G70070|AT3G05970|AT3G49670|AT5G37600|AT2G01950|AT1G01040|AT1G51660|AT1G13180|AT4G30340|AT1G54130|AT3G53810|AT1G36160|AT2G02480|AT3G55400|AT1G10670|AT1G09000|AT1G61140|AT5G40010|AT3G28860|AT2G36910|AT3G09660|AT4G23940|AT1G16890…
45934	5.2393e-28	9.3962e-27	67	219	1950	30472	negative regulation of nucleobase, nucleoside, nucleotide and nucleic acid metabolic process	AT5G17690|AT5G05660|AT5G02030|AT4G32551|AT1G20330|AT1G75080|AT4G39100|AT5G13080|AT4G16780|AT2G39810|AT1G15750|AT2G30280|AT1G33240|AT3G19580|AT5G47390|AT5G63980|AT4G21670|AT2G37630|AT5G67100|AT5G44280|AT3G20910|AT1G69770|AT4G13940|AT4G03190|AT3G10480|AT2G32700|AT1G04550|AT2G22670|AT4G14550|AT1G61140|AT1G13260|AT1G62990|AT5G62000|AT1G60170|AT2G22540|AT2G46830|AT2G18290|AT1G04020|AT5G03740|AT3G07050…
9890	1.1394e-27	2.0356e-26	68	228	1950	30472	negative regulation of biosynthetic process	AT5G17690|AT5G05660|AT5G57740|AT5G02030|AT4G32551|AT1G20330|AT1G75080|AT4G39100|AT5G13080|AT4G16780|AT2G39810|AT1G15750|AT2G30280|AT1G09570|AT1G33240|AT3G19580|AT5G47390|AT5G63980|AT4G21670|AT2G37630|AT5G67100|AT5G44280|AT3G20910|AT1G69770|AT4G13940|AT4G03190|AT3G10480|AT2G32700|AT1G04550|AT1G20780|AT2G22670|AT4G14550|AT1G08030|AT1G13260|AT1G62990|AT5G62000|AT1G60170|AT2G22540|AT2G46830|AT2G18290…
43687	1.3103e-27	2.3319e-26	253	1966	1950	30472	post-translational protein modification	AT4G24210|AT5G46210|AT1G10570|AT5G22000|AT5G63110|AT4G28370|AT3G05840|AT2G15790|AT3G06930|AT2G01820|AT1G75640|AT5G45800|AT4G23250|AT3G49670|AT1G55250|AT5G21140|AT5G23320|AT4G35910|AT1G09570|AT4G11920|AT5G44280|AT2G01830|AT1G69770|AT3G61790|AT4G03190|AT2G01950|AT1G51660|AT3G07360|AT3G48430|AT3G53810|AT2G04660|AT1G08910|AT4G12570|AT4G38740|AT1G09000|AT3G25230|AT1G16890|AT4G08500|AT5G63370|AT2G20000…
9891	3.088e-27	5.4536e-26	69	238	1950	30472	positive regulation of biosynthetic process	AT3G08510|AT2G26170|AT5G47220|AT3G54610|AT1G09100|AT1G61040|AT1G27370|AT4G40060|AT1G73500|AT3G51060|AT1G25540|AT5G62940|AT5G61730|AT5G05660|AT5G04410|AT3G11440|AT1G77180|AT2G20140|AT2G37678|AT3G05530|AT4G27410|AT4G24540|AT1G33280|AT4G11920|AT1G28470|AT5G44160|AT3G21200|AT2G32460|AT4G17500|AT5G61600|AT4G19600|AT4G29040|AT5G01270|AT4G23810|AT2G32700|AT1G34180|AT5G20730|AT4G01550|AT5G22220|AT2G36270…
31328	3.088e-27	5.4536e-26	69	238	1950	30472	positive regulation of cellular biosynthetic process	AT3G08510|AT2G26170|AT5G47220|AT3G54610|AT1G09100|AT1G61040|AT1G27370|AT4G40060|AT1G73500|AT3G51060|AT1G25540|AT5G62940|AT5G61730|AT5G05660|AT5G04410|AT3G11440|AT1G77180|AT2G20140|AT2G37678|AT3G05530|AT4G27410|AT4G24540|AT1G33280|AT4G11920|AT1G28470|AT5G44160|AT3G21200|AT2G32460|AT4G17500|AT5G61600|AT4G19600|AT4G29040|AT5G01270|AT4G23810|AT2G32700|AT1G34180|AT5G20730|AT4G01550|AT5G22220|AT2G36270…
42802	4.6514e-27	8.1833e-26	66	220	1950	30472	identical protein binding	AT3G01680|AT3G09840|AT4G08920|AT3G07780|AT3G59420|AT1G17840|AT3G06930|AT2G18790|AT2G22640|AT5G03680|AT5G35750|AT3G13300|AT5G37055|AT1G09530|AT2G44950|AT1G80600|AT4G16780|AT1G04400|AT4G24660|AT4G26200|AT4G24540|AT1G15750|AT1G55250|AT1G09570|AT5G48840|AT1G66340|AT2G37630|AT1G30970|AT5G48160|AT5G55250|AT4G37770|AT2G40080|AT1G17580|AT5G13570|AT4G11280|AT2G46340|AT4G33650|AT5G55490|AT1G13980|AT2G30490…
10558	5.1923e-27	9.1003e-26	65	214	1950	30472	negative regulation of macromolecule biosynthetic process	AT5G17690|AT5G05660|AT5G02030|AT4G32551|AT1G20330|AT1G75080|AT4G39100|AT5G13080|AT4G16780|AT2G39810|AT1G15750|AT2G30280|AT1G09570|AT1G33240|AT3G19580|AT5G47390|AT5G63980|AT4G21670|AT2G37630|AT5G67100|AT5G44280|AT3G20910|AT1G69770|AT4G13940|AT4G03190|AT3G10480|AT2G32700|AT1G04550|AT2G22670|AT4G14550|AT1G13260|AT1G62990|AT5G62000|AT1G60170|AT2G22540|AT2G46830|AT2G18290|AT1G04020|AT5G03740|AT3G07050…
51128	8.9995e-27	1.5713e-25	62	197	1950	30472	regulation of cellular component organization	AT1G13120|AT2G36850|AT1G09100|AT4G08920|AT3G24440|AT5G17410|AT4G03550|AT3G44600|AT1G77300|AT4G32551|AT5G37055|AT5G45600|AT5G39550|AT4G39100|AT4G16340|AT2G20140|AT3G05530|AT2G03060|AT2G38440|AT5G63980|AT4G29350|AT4G28860|AT2G42260|AT4G29040|AT5G13010|AT3G48430|AT3G07160|AT3G46290|AT3G01460|AT1G80260|AT3G57860|AT3G54870|AT4G22970|AT1G18750|AT4G38430|AT4G13850|AT2G20000|AT2G18290|AT5G04470|AT1G04020…
51726	1.9044e-26	3.3127e-25	58	175	1950	30472	regulation of cell cycle	AT5G42970|AT5G22000|AT1G68310|AT5G07290|AT4G29860|AT1G25580|AT1G20330|AT2G44950|AT5G58230|AT5G67260|AT1G66740|AT3G23580|AT5G14250|AT1G33240|AT5G24330|AT4G11920|AT4G05440|AT4G28980|AT5G67100|AT4G37650|AT2G42260|AT1G69380|AT4G19600|AT5G09790|AT5G61960|AT3G48750|AT1G22920|AT1G77390|AT3G57860|AT5G22220|AT4G22970|AT3G50070|AT2G23430|AT2G20000|AT2G18290|AT5G04470|AT1G04020|AT1G78770|AT3G27060|AT4G14220…
10014	8.1451e-26	1.4115e-24	23	25	1950	30472	meristem initiation	AT1G11130|AT1G80490|AT1G15750|AT1G20700|AT1G55580|AT2G34710|AT1G30490|AT1G56010|AT3G07780|AT5G53950|AT5G60690|AT5G27030|AT5G48160|AT3G15880|AT1G72560|AT2G20000|AT1G28560|AT5G13570|AT1G52150|AT3G13300|AT1G36160|AT3G16830|AT4G32880
51173	9.2591e-26	1.5986e-24	65	224	1950	30472	positive regulation of nitrogen compound metabolic process	AT5G47220|AT3G54610|AT1G09100|AT1G61040|AT1G27370|AT4G40060|AT1G73500|AT3G51060|AT1G25540|AT5G62940|AT5G05660|AT5G04410|AT3G11440|AT1G77180|AT2G20140|AT2G37678|AT3G05530|AT4G27410|AT4G24540|AT1G33280|AT4G11920|AT1G28470|AT5G44160|AT3G21200|AT2G32460|AT4G17500|AT5G61600|AT4G19600|AT4G29040|AT5G01270|AT4G23810|AT5G13010|AT2G32700|AT1G34180|AT1G54490|AT5G20730|AT4G01550|AT5G22220|AT5G61150|AT2G36270…
10628	2.1747e-25	3.7406e-24	63	214	1950	30472	positive regulation of gene expression	AT5G47220|AT3G54610|AT1G09100|AT1G61040|AT1G27370|AT4G40060|AT1G73500|AT3G51060|AT1G25540|AT5G62940|AT5G05660|AT5G04410|AT1G02140|AT3G11440|AT1G77180|AT2G20140|AT2G37678|AT3G05530|AT4G27410|AT4G24540|AT1G33280|AT1G28470|AT5G44160|AT4G02450|AT2G32460|AT4G17500|AT5G61600|AT4G19600|AT4G29040|AT5G01270|AT4G23810|AT2G32700|AT2G04025|AT1G34180|AT5G20730|AT4G01550|AT5G22220|AT2G36270|AT5G65590|AT2G36990…
10305	3.1034e-25	5.3182e-24	24	28	1950	30472	leaf vascular tissue pattern formation	AT2G32010|AT1G11130|AT3G54720|AT1G14000|AT5G16780|AT1G05470|AT3G52770|AT4G07410|AT1G19850|AT2G32280|AT2G36120|AT2G42580|AT3G44600|AT4G20910|AT4G13750|AT2G01950|AT5G55540|AT1G48410|AT3G63300|AT1G27340|AT1G48920|AT5G46700|AT4G18750|AT1G09700
35466	3.5328e-25	6.0318e-24	53	154	1950	30472	regulation of signaling pathway	AT5G17490|AT4G24210|AT3G05120|AT3G52430|AT4G03110|AT1G48270|AT3G51060|AT5G03280|AT5G13680|AT1G07430|AT5G08335|AT4G16340|AT5G23320|AT3G51550|AT5G50320|AT5G27320|AT5G66730|AT1G66340|AT4G02450|AT4G24580|AT2G32460|AT4G34460|AT3G63010|AT5G11310|AT3G45640|AT1G51660|AT1G01720|AT3G15730|AT1G01960|AT1G13980|AT2G28290|AT1G66350|AT3G21510|AT1G27340|AT3G11540|AT3G11220|AT2G26300|AT5G59220|AT4G29810|AT3G03450…
51253	8.3361e-25	1.4181e-23	59	193	1950	30472	negative regulation of RNA metabolic process	AT5G17690|AT5G05660|AT5G02030|AT4G32551|AT1G75080|AT4G39100|AT5G13080|AT4G16780|AT2G39810|AT1G15750|AT2G30280|AT3G19580|AT5G47390|AT5G63980|AT4G21670|AT2G37630|AT5G44280|AT3G20910|AT1G69770|AT4G13940|AT4G03190|AT3G10480|AT2G32700|AT1G04550|AT2G22670|AT4G14550|AT1G61140|AT1G13260|AT1G62990|AT5G62000|AT1G60170|AT2G22540|AT2G46830|AT1G04020|AT5G03740|AT3G07050|AT1G03770|AT5G13180|AT2G10606|AT3G07610…
44265	9.2576e-25	1.569e-23	99	491	1950	30472	cellular macromolecule catabolic process	AT5G46210|AT1G09100|AT1G66650|AT5G22000|AT2G30950|AT4G28370|AT4G21100|AT4G03110|AT5G57740|AT1G78870|AT1G64520|AT1G66660|AT5G63980|AT3G61790|AT4G03190|AT1G01040|AT2G02760|AT2G04660|AT1G54490|AT4G33210|AT4G12570|AT2G32550|AT5G42270|AT1G16890|AT5G47040|AT1G68050|AT2G18290|AT5G05560|AT4G14220|AT4G38630|AT5G57360|AT4G32940|AT1G17110|AT4G21530|AT2G01735|AT1G14400|AT1G75950|AT1G69670|AT4G34040|AT3G62980…
51321	1.1293e-24	1.9071e-23	50	140	1950	30472	meiotic cell cycle	AT3G08510|AT1G05180|AT2G36850|AT1G11060|AT5G21150|AT5G18700|AT4G02460|AT5G07290|AT4G09140|AT3G63480|AT1G01690|AT1G06660|AT5G48720|AT5G48600|AT1G34210|AT1G15110|AT2G06510|AT1G32310|AT5G15540|AT4G37450|AT5G61960|AT3G44550|AT3G07160|AT5G46700|AT1G77390|AT5G57790|AT4G00020|AT1G80260|AT3G57860|AT4G31400|AT3G09660|AT4G22970|AT5G63370|AT5G57880|AT1G31810|AT3G44540|AT5G35770|AT4G29170|AT2G41420|AT5G22500…
44444	1.3011e-24	2.1892e-23	907	10859	1950	30472	cytoplasmic part	AT5G17690|AT4G21060|AT5G42890|AT2G30950|AT5G63110|AT2G15790|AT4G35460|AT5G02190|AT5G03280|AT1G43130|AT2G27530|AT1G79560|AT2G02470|AT5G22800|AT2G25110|AT5G40480|AT5G19620|AT2G38440|AT2G17720|AT3G21640|AT4G24580|AT4G26760|AT4G37650|AT4G14510|AT1G78240|AT5G50280|AT1G54490|AT1G01960|AT4G38740|AT2G26670|AT3G55400|AT1G10670|AT4G00100|AT5G45940|AT5G18520|AT5G40010|AT1G67120|AT5G49070|AT3G44540|AT5G54650…
45935	1.5218e-24	2.5434e-23	63	221	1950	30472	positive regulation of nucleobase, nucleoside, nucleotide and nucleic acid metabolic process	AT5G47220|AT3G54610|AT1G09100|AT1G61040|AT1G27370|AT4G40060|AT1G73500|AT3G51060|AT1G25540|AT5G62940|AT5G05660|AT5G04410|AT3G11440|AT1G77180|AT2G20140|AT2G37678|AT3G05530|AT4G27410|AT4G24540|AT1G33280|AT4G11920|AT1G28470|AT5G44160|AT2G32460|AT4G17500|AT5G61600|AT4G19600|AT4G29040|AT5G01270|AT4G23810|AT5G13010|AT2G32700|AT1G34180|AT1G54490|AT5G20730|AT4G01550|AT5G22220|AT5G61150|AT2G36270|AT5G65590…
9629	1.5226e-24	2.5434e-23	37	75	1950	30472	response to gravity	AT2G34650|AT3G28860|AT2G36910|AT1G70730|AT1G23190|AT1G68130|AT1G31930|AT1G16510|AT4G24670|AT2G21650|AT2G18790|AT3G15540|AT2G18390|AT1G77740|AT1G05630|AT2G47000|AT4G16340|AT2G46990|AT5G67440|AT5G47990|AT3G54220|AT1G09570|AT5G17520|AT1G70940|AT2G38120|AT5G06140|AT2G19690|AT5G13750|AT5G35220|AT4G37590|AT1G70560|AT3G62100|AT5G45710|AT1G54490|AT1G73590|AT5G20730|AT2G26890
16481	2.2559e-24	3.7412e-23	58	190	1950	30472	negative regulation of transcription	AT5G17690|AT5G05660|AT5G02030|AT4G32551|AT1G75080|AT4G39100|AT5G13080|AT4G16780|AT2G39810|AT1G15750|AT2G30280|AT3G19580|AT5G47390|AT5G63980|AT4G21670|AT2G37630|AT5G44280|AT3G20910|AT1G69770|AT4G13940|AT4G03190|AT3G10480|AT2G32700|AT1G04550|AT2G22670|AT4G14550|AT1G13260|AT1G62990|AT5G62000|AT1G60170|AT2G22540|AT2G46830|AT1G04020|AT5G03740|AT3G07050|AT1G03770|AT5G13180|AT2G10606|AT3G07610|AT4G22140…
45892	2.2559e-24	3.7412e-23	58	190	1950	30472	negative regulation of transcription, DNA-dependent	AT5G17690|AT5G05660|AT5G02030|AT4G32551|AT1G75080|AT4G39100|AT5G13080|AT4G16780|AT2G39810|AT1G15750|AT2G30280|AT3G19580|AT5G47390|AT5G63980|AT4G21670|AT2G37630|AT5G44280|AT3G20910|AT1G69770|AT4G13940|AT4G03190|AT3G10480|AT2G32700|AT1G04550|AT2G22670|AT4G14550|AT1G13260|AT1G62990|AT5G62000|AT1G60170|AT2G22540|AT2G46830|AT1G04020|AT5G03740|AT3G07050|AT1G03770|AT5G13180|AT2G10606|AT3G07610|AT4G22140…
5654	2.9989e-24	4.9556e-23	88	408	1950	30472	nucleoplasm	AT4G04885|AT1G44900|AT4G03430|AT1G10570|AT3G54610|AT3G49660|AT4G08920|AT1G61040|AT3G24440|AT2G15430|AT1G55325|AT2G18790|AT1G25540|AT3G20800|AT1G03910|AT4G10760|AT5G28540|AT5G64960|AT5G37055|AT1G02140|AT5G13480|AT1G43850|AT1G06220|AT3G54810|AT1G77180|AT1G04400|AT2G37678|AT4G20060|AT3G55510|AT5G42020|AT4G29830|AT2G06990|AT3G04680|AT1G09570|AT5G23880|AT5G50320|AT4G10710|AT4G21670|AT1G49590|AT5G23080…
44248	3.1644e-24	5.2106e-23	151	978	1950	30472	cellular catabolic process	AT5G46210|AT1G09100|AT5G42890|AT1G66650|AT5G22000|AT2G30950|AT4G28370|AT4G21100|AT3G06810|AT4G03110|AT5G66460|AT5G57740|AT5G05340|AT3G44880|AT1G78870|AT3G05290|AT1G64520|AT5G27520|AT1G66660|AT5G63980|AT2G35690|AT3G61790|AT4G03190|AT1G01040|AT5G06720|AT2G02760|AT2G04660|AT1G54490|AT4G33210|AT4G12570|AT2G26670|AT5G17290|AT2G32550|AT5G42270|AT4G32810|AT1G16890|AT2G37040|AT3G19190|AT5G47040|AT1G68050…
44451	4.5739e-24	7.5047e-23	79	340	1950	30472	nucleoplasm part	AT4G04885|AT1G44900|AT4G03430|AT3G54610|AT3G49660|AT4G08920|AT1G61040|AT3G24440|AT2G15430|AT1G55325|AT2G18790|AT1G25540|AT3G20800|AT1G03910|AT4G10760|AT5G28540|AT5G64960|AT5G37055|AT1G02140|AT5G13480|AT1G06220|AT3G54810|AT1G77180|AT1G04400|AT2G37678|AT4G20060|AT3G55510|AT5G42020|AT4G29830|AT2G06990|AT3G04680|AT1G09570|AT5G23880|AT5G50320|AT4G10710|AT4G21670|AT1G49590|AT5G23080|AT5G12840|AT3G20910…
10646	4.9407e-24	8.078e-23	50	144	1950	30472	regulation of cell communication	AT5G17490|AT4G24210|AT3G05120|AT3G52430|AT4G03110|AT1G48270|AT3G51060|AT5G03280|AT1G07430|AT5G08335|AT2G39810|AT5G23320|AT3G51550|AT5G27320|AT1G66340|AT5G63980|AT4G02450|AT4G24580|AT2G32460|AT4G34460|AT3G63010|AT5G11310|AT3G45640|AT1G51660|AT1G01720|AT3G15730|AT1G01960|AT1G13980|AT2G28290|AT1G66350|AT1G18080|AT3G18130|AT3G11540|AT2G26300|AT5G59220|AT4G29810|AT3G03450|AT2G25170|AT2G17820|AT1G67890…
10431	7.0583e-24	1.1499e-22	30	49	1950	30472	seed maturation	AT4G24210|AT5G40010|AT5G63110|AT4G02280|AT1G30100|AT3G22960|AT3G14180|AT1G48270|AT4G29860|AT1G07430|AT5G58070|AT2G44950|AT4G19230|AT1G54060|AT5G22650|AT5G52920|AT1G55250|AT2G17820|AT5G23660|AT5G66730|AT2G38560|AT1G67890|AT5G53470|AT3G63210|AT3G44750|AT3G47860|AT4G32320|AT2G27840|AT5G13170|AT2G26130
10089	1.0567e-23	1.7156e-22	26	36	1950	30472	xylem development	AT4G00220|AT4G25320|AT2G28250|AT1G09540|AT1G62990|AT5G19530|AT5G66300|AT3G21710|AT2G45420|AT4G08150|AT5G02030|AT5G05340|AT1G80100|AT4G13195|AT5G13180|AT1G12260|AT3G24770|AT5G61480|AT5G60690|AT1G13950|AT2G18060|AT4G36160|AT5G51590|AT4G32880|AT1G62700|AT1G64625
23060	1.5069e-23	2.4378e-22	154	1023	1950	30472	signal transmission	AT3G52430|AT4G21100|AT1G73500|AT3G20840|AT2G18790|AT1G25540|AT5G07120|AT3G14270|AT5G03280|AT3G61140|AT1G46480|AT1G20090|AT2G18390|AT5G60120|AT1G27320|AT3G16857|AT3G01090|AT4G16780|AT2G31650|AT1G32230|AT1G09570|AT4G11920|AT5G63980|AT4G24580|AT2G40080|AT5G58440|AT4G17500|AT2G01830|AT5G61600|AT1G51660|AT1G54490|AT2G46340|AT4G14110|AT4G38740|AT2G26670|AT5G47200|AT3G08850|AT1G09000|AT2G32950|AT1G13260…
23046	1.6665e-23	2.6868e-22	154	1024	1950	30472	signaling process	AT3G52430|AT4G21100|AT1G73500|AT3G20840|AT2G18790|AT1G25540|AT5G07120|AT3G14270|AT5G03280|AT3G61140|AT1G46480|AT1G20090|AT2G18390|AT5G60120|AT1G27320|AT3G16857|AT3G01090|AT4G16780|AT2G31650|AT1G32230|AT1G09570|AT4G11920|AT5G63980|AT4G24580|AT2G40080|AT5G58440|AT4G17500|AT2G01830|AT5G61600|AT1G51660|AT1G54490|AT2G46340|AT4G14110|AT4G38740|AT2G26670|AT5G47200|AT3G08850|AT1G09000|AT2G32950|AT1G13260…
51254	1.6961e-23	2.7249e-22	60	210	1950	30472	positive regulation of RNA metabolic process	AT5G47220|AT3G54610|AT1G09100|AT1G61040|AT1G27370|AT4G40060|AT1G73500|AT3G51060|AT1G25540|AT5G62940|AT5G05660|AT5G04410|AT3G11440|AT1G77180|AT2G20140|AT2G37678|AT3G05530|AT4G27410|AT4G24540|AT1G33280|AT1G28470|AT5G44160|AT2G32460|AT4G17500|AT5G61600|AT4G19600|AT4G29040|AT5G01270|AT4G23810|AT5G13010|AT2G32700|AT1G34180|AT1G54490|AT5G20730|AT4G01550|AT5G22220|AT5G61150|AT2G36270|AT5G65590|AT2G36990…
5783	1.8142e-23	2.9046e-22	138	867	1950	30472	endoplasmic reticulum	AT3G59900|AT3G51460|AT1G64990|AT5G23570|AT1G19300|AT3G09090|AT5G02190|AT5G61730|AT5G03280|AT1G71040|AT5G58710|AT1G27320|AT1G69640|AT2G38280|AT2G01420|AT5G08335|AT2G25110|AT3G06300|AT5G42020|AT5G40480|AT3G50660|AT1G15110|AT5G23320|AT2G17720|AT1G32870|AT5G65000|AT5G14850|AT5G48000|AT3G21640|AT1G23010|AT2G01830|AT1G07420|AT3G45040|AT3G13870|AT1G73590|AT1G21750|AT5G47200|AT2G30490|AT4G00100|AT5G23670…
9798	1.8344e-23	2.9268e-22	28	43	1950	30472	axis specification	AT1G13980|AT3G02130|AT5G16560|AT2G34710|AT3G05040|AT3G52770|AT1G68310|AT1G69270|AT5G03680|AT4G32551|AT5G56270|AT1G12980|AT5G22650|AT1G30490|AT5G50320|AT1G23080|AT5G60690|AT1G19850|AT2G37630|AT1G17730|AT5G55250|AT1G73030|AT3G44750|AT5G63420|AT1G28560|AT2G32700|AT2G45450|AT2G26890
9630	3.4675e-23	5.5134e-22	34	67	1950	30472	gravitropism	AT2G34650|AT3G28860|AT2G36910|AT1G68130|AT1G31930|AT1G16510|AT4G24670|AT2G21650|AT2G18790|AT3G15540|AT2G18390|AT1G77740|AT1G05630|AT2G47000|AT4G16340|AT2G46990|AT5G67440|AT5G47990|AT3G54220|AT1G09570|AT1G70940|AT2G38120|AT5G06140|AT2G19690|AT5G13750|AT5G35220|AT4G37590|AT1G70560|AT3G62100|AT5G45710|AT1G54490|AT1G73590|AT5G20730|AT2G26890
70647	3.5668e-23	5.6519e-22	113	638	1950	30472	protein modification by small protein conjugation or removal	AT4G24210|AT5G46210|AT1G10570|AT1G66650|AT4G31820|AT5G22000|AT4G28370|AT4G21100|AT3G61140|AT5G57740|AT1G78870|AT2G44950|AT2G39810|AT1G55250|AT5G21140|AT4G35910|AT1G66660|AT4G11920|AT3G26810|AT5G44280|AT3G61790|AT4G03190|AT3G07360|AT2G02760|AT2G04660|AT1G20780|AT1G08910|AT4G14110|AT4G12570|AT2G32950|AT1G16890|AT1G68050|AT2G20000|AT4G31160|AT2G18290|AT5G05560|AT1G03010|AT1G78770|AT1G03770|AT4G14220…
10557	5.3186e-23	8.3991e-22	61	221	1950	30472	positive regulation of macromolecule biosynthetic process	AT5G47220|AT3G54610|AT1G09100|AT1G61040|AT1G27370|AT4G40060|AT1G73500|AT3G51060|AT1G25540|AT5G62940|AT5G05660|AT5G04410|AT3G11440|AT1G77180|AT2G20140|AT2G37678|AT3G05530|AT4G27410|AT4G24540|AT1G33280|AT4G11920|AT1G28470|AT5G44160|AT2G32460|AT4G17500|AT5G61600|AT4G19600|AT4G29040|AT5G01270|AT4G23810|AT2G32700|AT1G34180|AT5G20730|AT4G01550|AT5G22220|AT2G36270|AT5G65590|AT2G36990|AT2G22300|AT2G23430…
22603	9.5841e-23	1.5084e-21	40	97	1950	30472	regulation of anatomical structure morphogenesis	AT2G26170|AT2G36850|AT4G08920|AT4G24190|AT3G22780|AT1G18750|AT4G03550|AT4G38430|AT2G46410|AT3G18730|AT1G75820|AT2G20000|AT1G04020|AT4G32551|AT5G44610|AT1G01510|AT4G16340|AT1G11130|AT2G03060|AT3G49670|AT4G04970|AT1G60420|AT1G62360|AT1G55350|AT5G56600|AT5G53950|AT5G63980|AT5G23260|AT1G65470|AT4G28880|AT4G28860|AT5G65700|AT2G46920|AT2G41630|AT2G42620|AT3G13530|AT3G07160|AT5G46700|AT3G46290|AT5G54380
16874	1.365e-22	2.141e-21	110	621	1950	30472	ligase activity	AT1G66650|AT5G22000|AT4G28370|AT5G05980|AT5G57740|AT1G78870|AT2G44950|AT5G22800|AT3G05970|AT2G39810|AT1G55250|AT5G21140|AT1G66660|AT3G26810|AT5G44280|AT5G37600|AT4G37890|AT3G61790|AT4G03190|AT3G07360|AT2G02760|AT2G04660|AT1G20780|AT1G36160|AT1G08910|AT4G33210|AT4G12570|AT5G17290|AT3G55400|AT2G32950|AT1G16890|AT3G53180|AT1G68050|AT3G12670|AT2G18290|AT5G05560|AT1G03770|AT4G14220|AT5G57360|AT4G26300…
44255	2.0192e-22	3.1563e-21	116	679	1950	30472	cellular lipid metabolic process	AT2G26170|AT2G34630|AT5G42890|AT5G23570|AT5G46290|AT5G48230|AT1G30100|AT4G05530|AT3G06810|AT2G18790|AT5G61730|AT1G69640|AT1G77300|AT3G01090|AT3G05290|AT2G22240|AT4G31780|AT3G05970|AT1G15110|AT5G27520|AT2G35690|AT5G14850|AT5G48000|AT2G26830|AT1G19440|AT1G74960|AT1G07420|AT2G41210|AT3G45040|AT2G48120|AT1G36160|AT5G58560|AT4G30580|AT2G26670|AT1G10670|AT5G23670|AT1G05160|AT1G55020|AT1G34120|AT1G80340…
9582	2.7966e-22	4.3568e-21	33	66	1950	30472	detection of abiotic stimulus	AT4G02440|AT1G02090|AT4G08920|AT2G32950|AT5G42970|AT1G70730|AT4G21100|AT1G23190|AT4G26430|AT2G18790|AT1G25540|AT3G61140|AT1G22770|AT2G25930|AT5G11260|AT2G46370|AT1G09530|AT4G16780|AT3G54560|AT5G14250|AT1G09570|AT2G40080|AT1G28520|AT1G71230|AT2G26990|AT2G42400|AT1G22920|AT5G56280|AT2G46340|AT5G12080|AT4G14110|AT4G38740|AT2G26670
48645	3.5256e-22	5.4742e-21	29	50	1950	30472	organ formation	AT4G00220|AT2G28290|AT3G28860|AT1G17980|AT2G31160|AT4G39400|AT3G44600|AT4G20910|AT2G20300|AT5G55300|AT5G02030|AT3G12810|AT2G27990|AT4G38630|AT5G64390|AT2G06990|AT3G02000|AT2G31650|AT4G37180|AT5G53950|AT2G31090|AT2G37630|AT5G07280|AT5G05690|AT4G36920|AT1G22920|AT2G46020|AT1G73590|AT4G33210
10214	3.7131e-22	5.7459e-21	25	36	1950	30472	seed coat development	AT2G35620|AT5G22740|AT1G09540|AT2G22900|AT3G29810|AT5G49360|AT4G36890|AT1G02720|AT5G62620|AT5G03540|AT4G32551|AT3G13540|AT5G58230|AT5G67360|AT3G06440|AT5G63800|AT1G53500|AT1G21070|AT3G10380|AT2G32700|AT3G46550|AT3G10320|AT3G48990|AT1G43620|AT4G33770
741	4.2741e-22	6.5703e-21	24	33	1950	30472	karyogamy	AT5G23420|AT2G35940|AT5G42020|AT1G31470|AT3G28730|AT4G30930|AT3G03810|AT5G48030|AT4G05440|AT2G34260|AT1G19520|AT2G34790|AT2G31170|AT4G33050|AT1G24450|AT4G37890|AT1G31817|AT2G20585|AT2G01730|AT5G28540|AT1G72440|AT4G14040|AT2G20490|AT4G13890
10197	4.2741e-22	6.5703e-21	24	33	1950	30472	polar nucleus fusion	AT5G23420|AT2G35940|AT5G42020|AT1G31470|AT3G28730|AT4G30930|AT3G03810|AT5G48030|AT4G05440|AT2G34260|AT1G19520|AT2G34790|AT2G31170|AT4G33050|AT1G24450|AT4G37890|AT1G31817|AT2G20585|AT2G01730|AT5G28540|AT1G72440|AT4G14040|AT2G20490|AT4G13890
9056	4.7887e-22	7.3369e-21	192	1460	1950	30472	catabolic process	AT5G46210|AT1G09100|AT5G42890|AT1G66650|AT5G22000|AT3G52430|AT5G49720|AT2G30950|AT4G28370|AT4G04040|AT2G34590|AT4G21100|AT3G06810|AT4G03110|AT5G66460|AT3G63440|AT5G57740|AT1G50460|AT5G05340|AT3G44880|AT1G78870|AT3G05290|AT1G74030|AT3G04120|AT1G64520|AT1G35580|AT5G22510|AT5G27520|AT1G66660|AT5G63980|AT2G35690|AT3G61790|AT4G03190|AT1G01040|AT5G06720|AT2G02760|AT2G04660|AT1G54490|AT4G33210|AT4G12570…
45893	5.5386e-22	8.4299e-21	57	203	1950	30472	positive regulation of transcription, DNA-dependent	AT5G47220|AT3G54610|AT1G09100|AT1G61040|AT1G27370|AT4G40060|AT1G73500|AT3G51060|AT1G25540|AT5G62940|AT5G05660|AT5G04410|AT3G11440|AT1G77180|AT2G20140|AT2G37678|AT3G05530|AT4G27410|AT4G24540|AT1G33280|AT1G28470|AT5G44160|AT2G32460|AT4G17500|AT5G61600|AT4G19600|AT4G29040|AT5G01270|AT4G23810|AT2G32700|AT1G34180|AT5G20730|AT4G01550|AT5G22220|AT2G36270|AT5G65590|AT2G36990|AT2G22300|AT2G46830|AT3G11020…
45941	5.5386e-22	8.4299e-21	57	203	1950	30472	positive regulation of transcription	AT5G47220|AT3G54610|AT1G09100|AT1G61040|AT1G27370|AT4G40060|AT1G73500|AT3G51060|AT1G25540|AT5G62940|AT5G05660|AT5G04410|AT3G11440|AT1G77180|AT2G20140|AT2G37678|AT3G05530|AT4G27410|AT4G24540|AT1G33280|AT1G28470|AT5G44160|AT2G32460|AT4G17500|AT5G61600|AT4G19600|AT4G29040|AT5G01270|AT4G23810|AT2G32700|AT1G34180|AT5G20730|AT4G01550|AT5G22220|AT2G36270|AT5G65590|AT2G36990|AT2G22300|AT2G46830|AT3G11020…
9606	5.8894e-22	8.9345e-21	36	81	1950	30472	tropism	AT2G34650|AT4G08920|AT3G28860|AT2G36910|AT1G68130|AT1G31930|AT1G16510|AT4G24670|AT2G21650|AT2G18790|AT3G15540|AT2G18390|AT1G77740|AT1G05630|AT2G47000|AT4G16340|AT2G46990|AT1G04400|AT5G67440|AT5G47990|AT3G54220|AT1G09570|AT1G70940|AT2G38120|AT5G06140|AT2G19690|AT5G13750|AT5G35220|AT4G37590|AT1G70560|AT3G62100|AT5G45710|AT1G54490|AT1G73590|AT5G20730|AT2G26890
9559	1.365e-21	2.064e-20	24	34	1950	30472	embryo sac central cell differentiation	AT5G23420|AT2G35940|AT5G42020|AT1G31470|AT3G28730|AT4G30930|AT3G03810|AT5G48030|AT4G05440|AT2G34260|AT1G19520|AT2G34790|AT2G31170|AT4G33050|AT1G24450|AT4G37890|AT1G31817|AT2G20585|AT2G01730|AT5G28540|AT1G72440|AT4G14040|AT2G20490|AT4G13890
48585	1.4905e-21	2.2464e-20	45	131	1950	30472	negative regulation of response to stimulus	AT5G65050|AT5G17490|AT1G10370|AT5G46210|AT3G52430|AT4G29140|AT1G17980|AT1G66350|AT1G48270|AT3G51060|AT1G49040|AT5G03280|AT4G15415|AT3G11540|AT2G46370|AT1G07430|AT5G08335|AT2G26300|AT5G59220|AT4G22140|AT3G03450|AT1G08260|AT1G20900|AT2G25170|AT5G23320|AT2G17820|AT3G51550|AT1G66340|AT1G14920|AT3G03773|AT3G57390|AT4G02450|AT5G66350|AT4G26000|AT5G10720|AT5G60410|AT4G34460|AT5G11310|AT4G36260|AT1G71230…
48444	1.9271e-21	2.8856e-20	26	41	1950	30472	floral organ morphogenesis	AT1G59640|AT3G05120|AT3G22780|AT5G53400|AT1G17980|AT1G68130|AT4G39400|AT3G44600|AT4G20910|AT1G19270|AT5G03680|AT3G07050|AT1G01510|AT3G12810|AT4G38630|AT5G64390|AT2G06990|AT3G02000|AT2G31650|AT5G27320|AT4G37180|AT5G07280|AT5G05690|AT3G63010|AT4G36920|AT1G22920
48563	1.9271e-21	2.8856e-20	26	41	1950	30472	post-embryonic organ morphogenesis	AT1G59640|AT3G05120|AT3G22780|AT5G53400|AT1G17980|AT1G68130|AT4G39400|AT3G44600|AT4G20910|AT1G19270|AT5G03680|AT3G07050|AT1G01510|AT3G12810|AT4G38630|AT5G64390|AT2G06990|AT3G02000|AT2G31650|AT5G27320|AT4G37180|AT5G07280|AT5G05690|AT3G63010|AT4G36920|AT1G22920
31090	3.3612e-21	5.0169e-20	237	1993	1950	30472	organelle membrane	AT4G21060|AT1G15220|AT1G64990|AT3G57280|AT1G48270|AT5G03280|AT1G71040|AT1G27320|AT1G69640|AT1G50460|AT3G44880|AT3G05290|AT3G48680|AT4G14880|AT4G31780|AT3G05970|AT2G35610|AT5G40480|AT1G15110|AT5G19620|AT2G40400|AT5G23320|AT2G17720|AT5G14850|AT3G21640|AT5G43070|AT5G16910|AT2G18020|AT5G58440|AT2G01830|AT1G78240|AT3G45040|AT4G32400|AT5G58560|AT4G30580|AT1G01960|AT5G47200|AT2G30490|AT3G02230|AT5G23670…
160	3.528e-21	5.2489e-20	59	224	1950	30472	two-component signal transduction system (phosphorelay)	AT5G47220|AT3G52430|AT1G73500|AT3G20840|AT2G19560|AT5G03280|AT5G60120|AT1G27320|AT5G35750|AT3G16857|AT1G05850|AT1G51190|AT5G67180|AT1G32230|AT3G51550|AT1G66340|AT3G61630|AT4G02570|AT4G17500|AT2G01830|AT5G61600|AT5G57390|AT1G54490|AT3G15730|AT1G10470|AT5G18560|AT2G25180|AT2G28290|AT3G54990|AT4G31920|AT1G13260|AT1G74930|AT5G42190|AT5G10510|AT3G21510|AT2G46310|AT1G79700|AT1G16060|AT1G25560|AT5G65510…
1944	3.6944e-21	5.4789e-20	21	26	1950	30472	vasculature development	AT1G08590|AT5G47220|AT1G20700|AT1G09540|AT4G17490|AT3G24770|AT1G66340|AT5G61480|AT1G28370|AT1G74930|AT4G28650|AT3G15770|AT4G17500|AT5G03280|AT5G61600|AT1G46480|AT4G38800|AT2G34925|AT4G34840|AT1G54490|AT4G11280
71368	5.1594e-21	7.627e-20	31	62	1950	30472	cellular response to cytokinin stimulus	AT1G10470|AT2G25180|AT3G54010|AT4G31920|AT1G48270|AT3G21510|AT2G46310|AT5G03280|AT1G27320|AT5G35750|AT1G80100|AT3G11540|AT3G16857|AT4G01540|AT4G27950|AT1G10480|AT1G12980|AT1G64520|AT2G25170|AT3G61630|AT1G31880|AT1G67030|AT4G23750|AT1G68360|AT5G10720|AT2G01830|AT3G15150|AT1G28560|AT5G53290|AT4G16110|AT4G11140
48768	5.3733e-21	7.918e-20	18	19	1950	30472	root hair cell tip growth	AT5G64070|AT3G51460|AT5G20490|AT3G54870|AT5G49680|AT3G60630|AT4G00150|AT4G34580|AT3G16640|AT1G49240|AT5G09350|AT3G18780|AT3G61650|AT5G05620|AT5G44610|AT2G45160|AT2G26420|AT5G41950
5856	6.504e-21	9.5537e-20	76	355	1950	30472	cytoskeleton	AT2G37620|AT3G09840|AT3G07980|AT3G23670|AT5G17410|AT5G18700|AT3G04630|AT4G01370|AT2G22640|AT3G63480|AT1G30825|AT5G65930|AT3G44200|AT1G52240|AT2G44190|AT5G05620|AT5G43900|AT5G20490|AT1G80350|AT1G04160|AT2G38440|AT3G01610|AT1G65010|AT3G60740|AT4G29350|AT5G35700|AT4G02570|AT2G34680|AT4G26760|AT2G43790|AT2G46225|AT1G17580|AT4G27060|AT1G13180|AT3G48750|AT4G14150|AT2G04660|AT5G56580|AT1G80260|AT3G01780…
16570	8.7282e-21	1.278e-19	41	113	1950	30472	histone modification	AT1G16710|AT3G09600|AT3G01460|AT3G54610|AT1G61040|AT3G24440|AT5G49020|AT5G63110|AT5G61150|AT2G18000|AT3G20740|AT3G06930|AT5G08450|AT1G76710|AT1G51450|AT3G10390|AT1G77300|AT5G45600|AT1G79000|AT2G44950|AT1G62830|AT3G07610|AT4G29830|AT2G31650|AT2G06210|AT1G55250|AT3G22590|AT5G24330|AT1G14400|AT2G22475|AT5G11530|AT1G69770|AT5G09790|AT4G20400|AT1G79730|AT5G42400|AT2G23380|AT2G02760|AT3G48430|AT2G46040…
9581	9.1762e-21	1.3394e-19	33	72	1950	30472	detection of external stimulus	AT4G02440|AT1G02090|AT4G08920|AT2G32950|AT5G42970|AT1G70730|AT4G21100|AT1G23190|AT4G26430|AT2G18790|AT1G25540|AT3G61140|AT1G22770|AT2G25930|AT5G11260|AT2G46370|AT1G09530|AT4G16780|AT3G54560|AT5G14250|AT1G09570|AT2G40080|AT1G28520|AT1G71230|AT2G26990|AT2G42400|AT1G22920|AT5G56280|AT2G46340|AT5G12080|AT4G14110|AT4G38740|AT2G26670
51606	9.7774e-21	1.4226e-19	38	97	1950	30472	detection of stimulus	AT4G02440|AT1G02090|AT4G08920|AT2G32950|AT5G42970|AT1G70730|AT4G21100|AT1G23190|AT4G26430|AT4G39400|AT2G18790|AT1G25540|AT3G61140|AT1G22770|AT2G25930|AT5G11260|AT2G46370|AT3G01090|AT1G09530|AT4G16780|AT3G54560|AT5G14250|AT1G09570|AT1G66340|AT5G60410|AT2G40080|AT4G18710|AT1G28520|AT1G71230|AT2G26990|AT2G42400|AT1G22920|AT5G56280|AT2G46340|AT5G12080|AT4G14110|AT4G38740|AT2G26670
42335	1.562e-20	2.261e-19	21	27	1950	30472	cuticle development	AT3G27670|AT1G35460|AT4G00730|AT2G33510|AT1G67730|AT5G57800|AT1G68530|AT4G25050|AT2G26910|AT1G27950|AT3G43720|AT1G01120|AT5G49070|AT2G16280|AT2G20300|AT5G05660|AT1G19440|AT1G51140|AT1G25450|AT2G42620|AT2G26250
16569	1.5637e-20	2.261e-19	43	126	1950	30472	covalent chromatin modification	AT1G16710|AT3G09600|AT3G01460|AT3G54610|AT1G61040|AT3G24440|AT5G49020|AT5G63110|AT5G61150|AT1G60170|AT2G18000|AT3G20740|AT3G06930|AT5G08450|AT1G76710|AT1G51450|AT3G10390|AT1G77300|AT5G45600|AT1G79000|AT2G44950|AT1G62830|AT3G07610|AT4G29830|AT2G31650|AT2G06210|AT1G55250|AT3G22590|AT5G24330|AT1G14400|AT2G22475|AT5G11530|AT1G69770|AT4G13940|AT5G09790|AT4G20400|AT1G79730|AT5G42400|AT2G23380|AT2G02760…
51094	1.5724e-20	2.2665e-19	33	73	1950	30472	positive regulation of developmental process	AT4G04885|AT1G10670|AT4G31820|AT5G62000|AT4G02560|AT1G68050|AT4G39400|AT1G25540|AT2G46410|AT1G22770|AT3G10390|AT3G03090|AT4G32551|AT1G07430|AT1G79580|AT1G26830|AT1G04400|AT4G22140|AT1G11130|AT3G22590|AT5G63980|AT5G08370|AT2G19450|AT5G05690|AT1G28520|AT3G44110|AT1G50030|AT2G42400|AT3G48990|AT5G57390|AT2G43410|AT5G55390|AT4G32880
6629	1.7224e-20	2.475e-19	144	994	1950	30472	lipid metabolic process	AT2G26170|AT2G34630|AT5G42890|AT5G23570|AT3G52430|AT5G46290|AT5G48230|AT1G30100|AT4G05530|AT3G06810|AT1G48270|AT2G18790|AT5G61730|AT2G45400|AT1G69640|AT1G77300|AT3G01090|AT3G05290|AT2G22240|AT4G31780|AT4G24220|AT3G05970|AT3G50660|AT1G15110|AT5G27520|AT2G35690|AT5G14850|AT5G48000|AT2G26830|AT1G19440|AT1G74960|AT3G47860|AT1G07420|AT2G41210|AT3G45040|AT2G48120|AT1G36160|AT5G58560|AT4G30580|AT2G26670…
44257	2.0288e-20	2.9063e-19	82	411	1950	30472	cellular protein catabolic process	AT5G46210|AT1G66610|AT1G09100|AT1G66650|AT5G22000|AT3G54650|AT2G30950|AT5G64760|AT4G28370|AT4G21100|AT4G27880|AT4G26430|AT5G37930|AT5G57740|AT5G28540|AT5G05780|AT2G03120|AT1G78870|AT5G37890|AT1G26830|AT2G20140|AT5G09900|AT5G05700|AT3G05530|AT1G64520|AT1G66620|AT5G14250|AT1G65650|AT1G66660|AT5G16310|AT4G02570|AT3G20630|AT1G50250|AT3G61790|AT4G03190|AT4G29040|AT3G63530|AT2G42620|AT2G02760|AT2G04660…
9736	2.2163e-20	3.1651e-19	30	60	1950	30472	cytokinin mediated signaling pathway	AT1G10470|AT2G25180|AT3G54010|AT4G31920|AT1G48270|AT3G21510|AT2G46310|AT5G03280|AT1G27320|AT5G35750|AT1G80100|AT3G11540|AT3G16857|AT4G01540|AT4G27950|AT1G10480|AT1G12980|AT1G64520|AT2G25170|AT3G61630|AT1G31880|AT1G67030|AT4G23750|AT1G68360|AT5G10720|AT2G01830|AT3G15150|AT5G53290|AT4G16110|AT4G11140
9583	2.652e-20	3.7756e-19	29	56	1950	30472	detection of light stimulus	AT4G02440|AT1G02090|AT4G08920|AT2G32950|AT5G42970|AT4G21100|AT4G26430|AT2G18790|AT1G25540|AT3G61140|AT1G22770|AT2G25930|AT5G11260|AT2G46370|AT1G09530|AT4G16780|AT5G14250|AT1G09570|AT2G40080|AT1G28520|AT1G71230|AT2G26990|AT2G42400|AT1G22920|AT5G56280|AT2G46340|AT4G14110|AT4G38740|AT2G26670
30163	2.8252e-20	4.0099e-19	84	430	1950	30472	protein catabolic process	AT5G46210|AT1G66610|AT1G09100|AT1G66650|AT5G22000|AT3G54650|AT2G30950|AT5G64760|AT4G28370|AT4G21100|AT4G27880|AT4G26430|AT5G37930|AT5G57740|AT5G28540|AT5G05780|AT2G03120|AT1G78870|AT5G37890|AT1G26830|AT2G20140|AT5G09900|AT5G05700|AT3G05530|AT1G64520|AT1G66620|AT5G14250|AT1G65650|AT1G66660|AT5G16310|AT4G02570|AT3G20630|AT1G50250|AT3G61790|AT4G03190|AT4G29040|AT3G63530|AT2G26990|AT2G42620|AT2G02760…
9880	4.7109e-20	6.6455e-19	20	25	1950	30472	embryonic pattern specification	AT1G13980|AT1G14740|AT3G02130|AT1G12980|AT1G30490|AT3G54010|AT3G63500|AT5G16750|AT5G53400|AT1G23080|AT1G19850|AT1G17730|AT1G69270|AT1G73030|AT1G01040|AT5G63420|AT1G28560|AT1G04550|AT5G56270|AT2G26890
80022	4.7109e-20	6.6455e-19	20	25	1950	30472	primary root development	AT1G12240|AT2G25180|AT3G07780|AT4G31920|AT1G10940|AT1G12820|AT1G16300|AT5G48160|AT1G13300|AT4G24670|AT1G69780|AT1G70560|AT1G79530|AT2G42500|AT2G21170|AT3G16857|AT3G01090|AT5G51040|AT1G02330|AT1G80600
48653	5.0697e-20	7.13e-19	29	57	1950	30472	anther development	AT4G25640|AT3G02130|AT4G31400|AT4G24972|AT4G19180|AT1G17420|AT4G39400|AT5G56450|AT2G02970|AT1G77300|AT3G48520|AT2G02850|AT5G50570|AT5G50670|AT3G02000|AT3G49670|AT5G24330|AT3G22990|AT2G35270|AT5G07280|AT5G43270|AT5G05690|AT1G47260|AT5G65700|AT1G72520|AT2G41850|AT1G79530|AT5G50260|AT2G23140
6511	5.5001e-20	7.7118e-19	73	343	1950	30472	ubiquitin-dependent protein catabolic process	AT5G46210|AT1G66610|AT1G09100|AT1G66650|AT3G54650|AT5G64760|AT4G28370|AT4G21100|AT4G27880|AT4G26430|AT5G37930|AT5G57740|AT5G28540|AT5G05780|AT1G78870|AT5G37890|AT1G26830|AT2G20140|AT5G09900|AT5G05700|AT3G05530|AT1G64520|AT1G66620|AT5G14250|AT1G65650|AT1G66660|AT5G16310|AT4G02570|AT3G20630|AT3G61790|AT4G03190|AT4G29040|AT3G63530|AT2G42620|AT2G02760|AT2G04660|AT3G13672|AT4G33210|AT4G12570|AT1G16890…
10191	5.8705e-20	8.2062e-19	21	28	1950	30472	mucilage metabolic process	AT5G67360|AT2G35620|AT5G22740|AT3G06440|AT1G62990|AT4G28370|AT2G22900|AT3G29810|AT5G63800|AT1G53500|AT4G36890|AT1G21070|AT1G02720|AT3G10380|AT5G62620|AT2G32700|AT5G03540|AT4G32551|AT3G46550|AT3G10320|AT3G13540
48825	1.2123e-19	1.6895e-18	23	35	1950	30472	cotyledon development	AT1G12980|AT5G46210|AT1G64520|AT2G34650|AT5G22510|AT4G31820|AT3G23980|AT3G61630|AT2G32280|AT4G23750|AT4G24670|AT3G54180|AT2G46310|AT3G14370|AT1G69780|AT4G15900|AT1G70560|AT2G26700|AT1G08410|AT3G07050|AT1G73590|AT5G53290|AT4G11140
19941	1.3117e-19	1.8226e-18	73	348	1950	30472	modification-dependent protein catabolic process	AT5G46210|AT1G66610|AT1G09100|AT1G66650|AT3G54650|AT5G64760|AT4G28370|AT4G21100|AT4G27880|AT4G26430|AT5G37930|AT5G57740|AT5G28540|AT5G05780|AT1G78870|AT5G37890|AT1G26830|AT2G20140|AT5G09900|AT5G05700|AT3G05530|AT1G64520|AT1G66620|AT5G14250|AT1G65650|AT1G66660|AT5G16310|AT4G02570|AT3G20630|AT3G61790|AT4G03190|AT4G29040|AT3G63530|AT2G42620|AT2G02760|AT2G04660|AT3G13672|AT4G33210|AT4G12570|AT1G16890…
5730	1.4015e-19	1.9415e-18	79	398	1950	30472	nucleolus	AT3G55620|AT3G11964|AT3G09840|AT3G07980|AT4G05410|AT3G56990|AT5G23570|AT5G63110|AT2G15430|AT5G55920|AT1G23290|AT2G21870|AT2G02955|AT1G43170|AT1G20090|AT1G17690|AT1G02140|AT1G02780|AT1G72050|AT1G77180|AT1G54060|AT3G55510|AT4G01560|AT5G42020|AT5G52820|AT4G27490|AT5G16750|AT4G10710|AT3G25520|AT3G59550|AT2G37630|AT1G48380|AT2G18020|AT3G15010|AT2G17250|AT1G04635|AT3G44110|AT1G48850|AT3G44750|AT5G39740…
6066	1.4211e-19	1.9629e-18	81	415	1950	30472	alcohol metabolic process	AT3G02570|AT3G07020|AT1G09780|AT4G26270|AT4G04040|AT2G34590|AT5G48230|AT1G63180|AT3G01640|AT4G11850|AT5G61410|AT1G50460|AT1G20330|AT5G43940|AT1G74030|AT2G22240|AT5G42810|AT5G55480|AT3G04120|AT3G02780|AT1G64440|AT3G50660|AT1G15110|AT1G19630|AT5G48000|AT5G61760|AT3G20440|AT2G26830|AT1G53000|AT1G07420|AT1G79530|AT3G15730|AT5G58560|AT4G33770|AT1G11680|AT1G55180|AT3G02230|AT5G24400|AT5G45340|AT5G23670…
9409	1.5571e-19	2.1442e-18	73	349	1950	30472	response to cold	AT5G65050|AT3G02130|AT4G03430|AT5G17690|AT3G51780|AT1G09780|AT3G24440|AT4G02380|AT4G01370|AT2G18790|AT5G54470|AT1G27320|AT5G61410|AT5G35750|AT1G50460|AT5G37770|AT5G58070|AT3G48360|AT2G39810|AT5G65080|AT5G63980|AT2G39730|AT5G16910|AT2G43790|AT1G01120|AT5G53470|AT2G16280|AT2G21660|AT3G45640|AT1G74960|AT3G48750|AT2G21060|AT1G36160|AT5G01600|AT5G40010|AT2G16500|AT4G24190|AT5G63770|AT1G68530|AT5G61150…
9414	1.5617e-19	2.1442e-18	68	309	1950	30472	response to water deprivation	AT2G39800|AT3G02130|AT1G05180|AT5G47100|AT3G06010|AT4G08920|AT1G32560|AT4G02380|AT1G30100|AT1G27320|AT5G35750|AT4G32551|AT5G05860|AT3G16857|AT5G58070|AT1G05850|AT1G04400|AT4G27410|AT1G32230|AT1G33240|AT3G19580|AT5G63980|AT1G02730|AT2G01830|AT2G21660|AT1G18390|AT3G47860|AT2G32700|AT2G42620|AT1G05680|AT2G46140|AT5G45340|AT2G25180|AT5G40010|AT4G31920|AT4G24190|AT4G02280|AT2G36270|AT2G37040|AT1G69270…
71482	1.6347e-19	2.2378e-18	41	121	1950	30472	cellular response to light stimulus	AT1G10470|AT4G02440|AT1G02090|AT4G08920|AT2G32950|AT3G08550|AT5G42970|AT4G21100|AT1G48270|AT2G36890|AT4G26430|AT2G36990|AT2G18790|AT1G25540|AT3G61140|AT1G22770|AT2G25930|AT5G11260|AT2G46370|AT1G09530|AT2G26300|AT4G16780|AT1G04400|AT5G14250|AT1G09570|AT4G28880|AT4G28860|AT2G40080|AT1G28520|AT1G71230|AT2G26990|AT2G42400|AT2G48120|AT1G22920|AT5G20730|AT5G56280|AT2G46340|AT4G14110|AT1G21970|AT4G38740…
60089	1.8471e-19	2.5137e-18	73	350	1950	30472	molecular transducer activity	AT3G08510|AT3G07980|AT4G08920|AT4G31820|AT3G59420|AT1G73500|AT1G48270|AT5G48150|AT4G01370|AT2G18790|AT3G22942|AT4G22910|AT1G27320|AT1G02900|AT5G35750|AT3G16857|AT1G63700|AT1G04400|AT1G34210|AT1G12040|AT1G09570|AT1G66340|AT4G11920|AT2G43790|AT4G34460|AT2G01830|AT4G08480|AT3G45640|AT2G01950|AT1G51660|AT1G42470|AT2G46340|AT5G56580|AT1G10470|AT2G25180|AT1G09000|AT4G31920|AT2G13790|AT4G08500|AT1G31930…
4871	1.8471e-19	2.5137e-18	73	350	1950	30472	signal transducer activity	AT3G08510|AT3G07980|AT4G08920|AT4G31820|AT3G59420|AT1G73500|AT1G48270|AT5G48150|AT4G01370|AT2G18790|AT3G22942|AT4G22910|AT1G27320|AT1G02900|AT5G35750|AT3G16857|AT1G63700|AT1G04400|AT1G34210|AT1G12040|AT1G09570|AT1G66340|AT4G11920|AT2G43790|AT4G34460|AT2G01830|AT4G08480|AT3G45640|AT2G01950|AT1G51660|AT1G42470|AT2G46340|AT5G56580|AT1G10470|AT2G25180|AT1G09000|AT4G31920|AT2G13790|AT4G08500|AT1G31930…
48236	1.9139e-19	2.5969e-18	24	39	1950	30472	plant-type spore development	AT5G45550|AT3G08510|AT2G36850|AT1G34210|AT5G21150|AT1G15110|AT1G32310|AT1G71830|AT5G18700|AT5G07280|AT5G57880|AT1G31810|AT4G37450|AT3G44540|AT5G35770|AT3G44550|AT5G67600|AT3G07160|AT2G41420|AT5G46700|AT1G06660|AT1G77390|AT5G22500|AT5G57790
9585	2.1783e-19	2.9384e-18	28	55	1950	30472	red, far-red light phototransduction	AT4G02440|AT1G02090|AT2G32950|AT5G42970|AT4G21100|AT4G26430|AT2G18790|AT1G25540|AT3G61140|AT1G22770|AT2G25930|AT5G11260|AT2G46370|AT1G09530|AT4G16780|AT5G14250|AT1G09570|AT2G40080|AT1G28520|AT1G71230|AT2G26990|AT2G42400|AT1G22920|AT5G56280|AT2G46340|AT4G14110|AT4G38740|AT2G26670
7602	2.1783e-19	2.9384e-18	28	55	1950	30472	phototransduction	AT4G02440|AT1G02090|AT2G32950|AT5G42970|AT4G21100|AT4G26430|AT2G18790|AT1G25540|AT3G61140|AT1G22770|AT2G25930|AT5G11260|AT2G46370|AT1G09530|AT4G16780|AT5G14250|AT1G09570|AT2G40080|AT1G28520|AT1G71230|AT2G26990|AT2G42400|AT1G22920|AT5G56280|AT2G46340|AT4G14110|AT4G38740|AT2G26670
43632	2.5932e-19	3.488e-18	73	352	1950	30472	modification-dependent macromolecule catabolic process	AT5G46210|AT1G66610|AT1G09100|AT1G66650|AT3G54650|AT5G64760|AT4G28370|AT4G21100|AT4G27880|AT4G26430|AT5G37930|AT5G57740|AT5G28540|AT5G05780|AT1G78870|AT5G37890|AT1G26830|AT2G20140|AT5G09900|AT5G05700|AT3G05530|AT1G64520|AT1G66620|AT5G14250|AT1G65650|AT1G66660|AT5G16310|AT4G02570|AT3G20630|AT3G61790|AT4G03190|AT4G29040|AT3G63530|AT2G42620|AT2G02760|AT2G04660|AT3G13672|AT4G33210|AT4G12570|AT1G16890…
10082	3.3229e-19	4.4565e-18	18	21	1950	30472	regulation of root meristem growth	AT1G44900|AT5G24740|AT2G25180|AT1G08030|AT4G31920|AT5G46520|AT1G70940|AT1G71696|AT1G13620|AT1G69380|AT3G44600|AT3G15150|AT2G04025|AT3G16857|AT5G60810|AT5G13290|AT2G25010|AT4G16110
9415	4.6604e-19	6.2323e-18	68	315	1950	30472	response to water	AT2G39800|AT3G02130|AT1G05180|AT5G47100|AT3G06010|AT4G08920|AT1G32560|AT4G02380|AT1G30100|AT1G27320|AT5G35750|AT4G32551|AT5G05860|AT3G16857|AT5G58070|AT1G05850|AT1G04400|AT4G27410|AT1G32230|AT1G33240|AT3G19580|AT5G63980|AT1G02730|AT2G01830|AT2G21660|AT1G18390|AT3G47860|AT2G32700|AT2G42620|AT1G05680|AT2G46140|AT5G45340|AT2G25180|AT5G40010|AT4G31920|AT4G24190|AT4G02280|AT2G36270|AT2G37040|AT1G69270…
42127	5.7217e-19	7.6295e-18	29	61	1950	30472	regulation of cell proliferation	AT3G59900|AT1G44900|AT5G22220|AT1G68310|AT5G62000|AT1G17980|AT3G50070|AT1G13620|AT5G13680|AT1G04020|AT3G11220|AT2G26300|AT4G37740|AT1G11130|AT5G67260|AT2G36400|AT1G55350|AT4G14713|AT1G30210|AT3G04740|AT4G34160|AT3G15150|AT5G51451|AT2G04025|AT3G48750|AT5G60810|AT4G32880|AT4G33495|AT4G37750
9057	7.419e-19	9.8643e-18	111	702	1950	30472	macromolecule catabolic process	AT5G46210|AT1G09100|AT1G66650|AT5G22000|AT5G49720|AT2G30950|AT4G28370|AT4G21100|AT4G03110|AT5G66460|AT5G57740|AT1G78870|AT1G64520|AT1G66660|AT5G63980|AT3G61790|AT4G03190|AT1G01040|AT2G02760|AT2G04660|AT1G54490|AT4G33210|AT4G12570|AT2G32550|AT5G42270|AT1G16890|AT5G47040|AT1G68050|AT2G18290|AT5G05560|AT4G14220|AT4G38630|AT5G57360|AT4G32940|AT1G17110|AT4G21530|AT4G28320|AT2G01735|AT1G14400|AT2G43570…
7010	9.0143e-19	1.1951e-17	47	164	1950	30472	cytoskeleton organization	AT2G37620|AT1G80260|AT1G11060|AT4G01710|AT3G23670|AT5G49720|AT5G17410|AT5G18700|AT4G01370|AT5G57880|AT2G22640|AT1G68060|AT1G20090|AT2G18390|AT1G30825|AT5G54650|AT3G43210|AT3G44200|AT2G44190|AT1G75640|AT5G05620|AT5G44610|AT5G28646|AT1G01510|AT1G80350|AT5G19400|AT1G61030|AT5G18410|AT3G27000|AT2G38440|AT5G56600|AT3G60740|AT4G29350|AT5G35700|AT2G35110|AT2G19760|AT4G26760|AT1G75950|AT5G08120|AT5G55230…
51603	9.6876e-19	1.2807e-17	78	402	1950	30472	proteolysis involved in cellular protein catabolic process	AT5G46210|AT1G66610|AT1G09100|AT1G66650|AT5G22000|AT3G54650|AT5G64760|AT4G28370|AT4G21100|AT4G27880|AT4G26430|AT5G37930|AT5G57740|AT5G28540|AT5G05780|AT2G03120|AT1G78870|AT5G37890|AT1G26830|AT2G20140|AT5G09900|AT5G05700|AT3G05530|AT1G64520|AT1G66620|AT5G14250|AT1G65650|AT1G66660|AT5G16310|AT4G02570|AT3G20630|AT3G61790|AT4G03190|AT4G29040|AT3G63530|AT2G42620|AT2G02760|AT2G04660|AT3G13672|AT4G33210…
44267	1.0445e-18	1.3769e-17	392	4024	1950	30472	cellular protein metabolic process	AT4G24210|AT1G10570|AT4G21060|AT1G09100|AT2G30950|AT5G63110|AT2G15790|AT5G45800|AT2G27530|AT3G05290|AT5G22800|AT4G23250|AT1G55250|AT1G09570|AT2G17720|AT2G38560|AT3G21640|AT1G69770|AT3G07360|AT2G04660|AT4G12570|AT4G38740|AT3G55400|AT4G00100|AT1G09000|AT1G33430|AT5G63370|AT5G05560|AT5G51020|AT4G38630|AT4G00330|AT4G29810|AT4G26300|AT1G67490|AT2G39990|AT1G13950|AT1G69670|AT4G34040|AT2G46040|AT3G54010…
10492	1.1933e-18	1.5685e-17	16	17	1950	30472	maintenance of shoot apical meristem identity	AT3G06010|AT3G07780|AT5G19310|AT4G11920|AT3G60630|AT5G63780|AT2G31160|AT5G48160|AT5G10510|AT5G44280|AT4G00150|AT5G65510|AT1G04020|AT2G45160|AT1G03770|AT4G37750
10564	1.2054e-18	1.58e-17	30	67	1950	30472	regulation of cell cycle process	AT3G57860|AT5G42970|AT4G22970|AT5G07290|AT4G29860|AT1G25580|AT2G18290|AT5G04470|AT1G04020|AT1G20330|AT2G44950|AT1G78770|AT1G79280|AT1G80370|AT1G55350|AT5G14250|AT1G15570|AT1G33240|AT4G11920|AT4G21530|AT2G34780|AT3G12280|AT2G42260|AT1G69380|AT3G15150|AT5G61960|AT1G71230|AT3G48750|AT1G22920|AT5G05970
71478	1.2306e-18	1.6085e-17	41	127	1950	30472	cellular response to radiation	AT1G10470|AT4G02440|AT1G02090|AT4G08920|AT2G32950|AT3G08550|AT5G42970|AT4G21100|AT1G48270|AT2G36890|AT4G26430|AT2G36990|AT2G18790|AT1G25540|AT3G61140|AT1G22770|AT2G25930|AT5G11260|AT2G46370|AT1G09530|AT2G26300|AT4G16780|AT1G04400|AT5G14250|AT1G09570|AT4G28880|AT4G28860|AT2G40080|AT1G28520|AT1G71230|AT2G26990|AT2G42400|AT2G48120|AT1G22920|AT5G20730|AT5G56280|AT2G46340|AT4G14110|AT1G21970|AT4G38740…
10035	1.6594e-18	2.1628e-17	109	690	1950	30472	response to inorganic substance	AT3G02570|AT4G02380|AT3G56350|AT1G08090|AT2G37860|AT4G29860|AT4G35460|AT5G03280|AT5G05340|AT5G58270|AT1G78870|AT2G22240|AT4G14880|AT3G12810|AT3G10920|AT3G04120|AT1G35580|AT5G42020|AT1G32230|AT1G09570|AT5G47390|AT2G14210|AT2G37630|AT1G74560|AT2G21660|AT3G56090|AT4G23810|AT5G06720|AT2G43750|AT1G21750|AT4G12570|AT2G03050|AT4G38740|AT3G29035|AT5G17310|AT5G40770|AT4G24190|AT3G25230|AT5G15650|AT1G16890…
71369	1.8324e-18	2.3816e-17	52	201	1950	30472	cellular response to ethylene stimulus	AT3G59900|AT5G47220|AT3G52430|AT1G73500|AT3G20840|AT2G19560|AT5G03280|AT5G60120|AT1G05850|AT1G51190|AT5G67180|AT1G32230|AT3G51550|AT1G66340|AT3G61630|AT4G02570|AT4G17500|AT3G62680|AT5G61600|AT5G57390|AT1G54490|AT3G15730|AT5G18560|AT2G28290|AT3G54990|AT1G13260|AT1G74930|AT5G42190|AT5G10510|AT2G46310|AT1G79700|AT1G16060|AT1G25560|AT5G65510|AT4G27950|AT1G12980|AT4G17490|AT3G54320|AT2G41710|AT1G28370…
44283	1.9602e-18	2.5405e-17	146	1068	1950	30472	small molecule biosynthetic process	AT2G39800|AT3G02570|AT5G23570|AT1G12910|AT5G46290|AT1G30100|AT1G73500|AT1G48270|AT2G45400|AT5G05980|AT1G69640|AT2G38280|AT5G37850|AT5G05340|AT1G05010|AT5G05860|AT3G01090|AT2G22240|AT5G42810|AT4G14880|AT1G80600|AT3G04120|AT1G15110|AT2G35690|AT3G23940|AT5G37600|AT3G15010|AT4G37770|AT2G26830|AT1G19440|AT2G20610|AT1G74960|AT1G17020|AT1G07420|AT1G54130|AT1G36160|AT2G43750|AT5G58560|AT2G26670|AT2G30490…
10229	2.3289e-18	3.01e-17	19	25	1950	30472	inflorescence development	AT1G09230|AT4G29900|AT4G31820|AT3G02260|AT5G53400|AT3G21220|AT4G29350|AT1G23290|AT2G19760|AT2G43790|AT2G17040|AT1G69690|AT3G45640|AT3G47620|AT1G51660|AT1G73177|AT1G73590|AT1G63700|AT2G27990
8610	3.1493e-18	4.059e-17	93	544	1950	30472	lipid biosynthetic process	AT2G26170|AT2G34630|AT3G54010|AT5G23570|AT3G07020|AT2G38110|AT5G46290|AT5G48230|AT1G30100|AT1G49430|AT5G03080|AT2G45400|AT1G69640|AT1G20330|AT3G01090|AT2G22240|AT4G31780|AT4G31910|AT5G64070|AT3G02780|AT3G50660|AT1G15110|AT3G57650|AT2G35690|AT5G14850|AT1G19630|AT5G48000|AT1G01120|AT2G16280|AT5G09350|AT2G26830|AT1G19440|AT1G74960|AT1G53000|AT1G07420|AT3G45040|AT2G48120|AT1G36160|AT2G07050|AT5G58560…
71214	3.4314e-18	4.4103e-17	47	169	1950	30472	cellular response to abiotic stimulus	AT1G10470|AT2G32010|AT4G02440|AT1G02090|AT4G08920|AT2G32950|AT1G03060|AT3G08550|AT5G42970|AT4G21100|AT1G48270|AT2G36890|AT4G26430|AT2G36990|AT2G18790|AT1G25540|AT3G61140|AT1G22770|AT2G25930|AT5G11260|AT2G46370|AT1G09530|AT2G26300|AT4G16780|AT1G04400|AT5G14250|AT1G09570|AT4G28880|AT4G28860|AT2G40080|AT2G01830|AT1G28520|AT3G45640|AT1G71230|AT2G26990|AT2G42400|AT1G05680|AT2G48120|AT1G22920|AT5G13170…
32787	4.4769e-18	5.7381e-17	88	501	1950	30472	monocarboxylic acid metabolic process	AT5G41480|AT5G42890|AT4G31500|AT3G54010|AT5G23570|AT4G05450|AT2G38110|AT5G46290|AT1G30100|AT4G05530|AT3G06810|AT2G18790|AT1G49430|AT1G72970|AT5G05980|AT1G69640|AT3G48520|AT3G10870|AT2G46370|AT3G01090|AT3G05290|AT3G06300|AT3G05970|AT3G04120|AT5G27520|AT2G17720|AT2G35690|AT4G14430|AT4G37770|AT1G79810|AT1G01120|AT2G16280|AT3G10160|AT1G01480|AT1G19440|AT2G20610|AT1G74960|AT3G44550|AT1G70560|AT1G07420…
48359	4.4897e-18	5.7386e-17	17	20	1950	30472	mucilage metabolic process involved seed coat development	AT5G67360|AT2G35620|AT5G22740|AT3G06440|AT3G29810|AT5G63800|AT4G36890|AT1G21070|AT1G02720|AT3G10380|AT5G62620|AT2G32700|AT5G03540|AT4G32551|AT3G46550|AT3G10320|AT3G13540
16740	6.3094e-18	8.0423e-17	343	3432	1950	30472	transferase activity	AT4G21060|AT2G34630|AT3G49660|AT4G15180|AT3G08550|AT2G15430|AT4G04040|AT5G49160|AT3G05840|AT3G06930|AT2G01820|AT1G27320|AT5G37850|AT1G50460|AT1G75640|AT5G45800|AT4G14880|AT2G25110|AT4G31780|AT5G67260|AT4G23250|AT3G49670|AT1G15110|AT1G32230|AT5G23320|AT4G35910|AT1G09570|AT5G14850|AT3G52280|AT5G16910|AT2G44680|AT2G01830|AT1G69770|AT3G20440|AT2G01950|AT1G51660|AT5G11110|AT4G30340|AT1G78240|AT1G54130…
16604	9.0383e-18	1.1489e-16	34	92	1950	30472	nuclear body	AT4G03430|AT4G08920|AT2G32950|AT2G41500|AT3G24440|AT5G63370|AT2G18790|AT1G03910|AT4G10760|AT2G18290|AT5G64960|AT5G37055|AT1G02140|AT1G06220|AT1G61620|AT1G77180|AT1G04400|AT2G37678|AT2G18915|AT2G06990|AT1G60220|AT1G09570|AT1G49590|AT5G23080|AT5G60410|AT3G12680|AT1G01040|AT1G27650|AT2G27100|AT5G42820|AT2G20490|AT2G46340|AT1G02330|AT1G09700
9873	9.8752e-18	1.2519e-16	48	180	1950	30472	ethylene mediated signaling pathway	AT5G18560|AT5G47220|AT2G28290|AT3G54990|AT3G52430|AT1G13260|AT1G74930|AT1G73500|AT5G42190|AT5G10510|AT3G20840|AT2G19560|AT2G46310|AT1G79700|AT5G03280|AT5G60120|AT1G16060|AT1G25560|AT5G65510|AT1G05850|AT1G51190|AT4G27950|AT1G12980|AT4G17490|AT5G67180|AT1G32230|AT3G54320|AT3G51550|AT2G41710|AT1G66340|AT3G61630|AT1G28370|AT4G02570|AT4G23750|AT5G10720|AT1G75950|AT4G17500|AT5G61600|AT3G62980|AT5G57390…
1558	1.2831e-17	1.6221e-16	28	62	1950	30472	regulation of cell growth	AT4G08920|AT4G40060|AT1G18750|AT4G38430|AT2G20000|AT1G02900|AT4G32551|AT3G51800|AT2G03060|AT5G24630|AT1G60420|AT1G55350|AT1G33240|AT3G51550|AT5G56600|AT5G47390|AT5G63980|AT3G12280|AT2G19690|AT3G16640|AT1G50030|AT2G20610|AT2G41630|AT3G13530|AT3G07160|AT2G41230|AT3G46290|AT5G54380
32446	1.3986e-17	1.7633e-16	95	575	1950	30472	protein modification by small protein conjugation	AT4G24210|AT5G46210|AT1G66610|AT1G05180|AT3G52590|AT2G32410|AT1G66650|AT4G31820|AT5G22000|AT3G54650|AT4G28370|AT4G21100|AT4G27880|AT5G37930|AT2G01620|AT4G22910|AT5G57740|AT1G78870|AT5G37890|AT2G44950|AT5G39550|AT2G21470|AT3G48360|AT1G26830|AT2G39810|AT1G55250|AT1G66620|AT5G21140|AT4G35910|AT1G66660|AT4G11920|AT1G31340|AT4G02570|AT3G26810|AT5G44280|AT3G61590|AT1G79810|AT3G61790|AT4G03190|AT3G63530…
9956	1.7681e-17	2.2231e-16	15	16	1950	30472	radial pattern formation	AT3G02130|AT5G16560|AT4G31400|AT3G54220|AT5G60690|AT5G10510|AT1G16510|AT3G08800|AT4G37650|AT1G69270|AT5G55540|AT5G65510|AT1G28560|AT5G57390|AT5G46700
10192	2.7925e-17	3.5016e-16	18	24	1950	30472	mucilage biosynthetic process	AT2G35620|AT5G22740|AT3G06440|AT1G62990|AT2G22900|AT3G29810|AT5G63800|AT1G53500|AT4G36890|AT1G21070|AT1G02720|AT3G10380|AT5G62620|AT2G32700|AT5G03540|AT3G46550|AT3G10320|AT3G13540
12505	3.0165e-17	3.7722e-16	133	963	1950	30472	endomembrane system	AT3G51460|AT4G21060|AT1G64990|AT3G05040|AT4G28370|AT1G19300|AT5G07120|AT5G03280|AT1G71040|AT1G75120|AT1G27320|AT1G69640|AT5G05620|AT5G08335|AT1G27600|AT3G06300|AT2G35610|AT3G55830|AT5G40480|AT1G15110|AT5G23320|AT2G17720|AT1G32870|AT5G65000|AT5G14850|AT3G21640|AT5G43070|AT5G16910|AT1G23010|AT5G58440|AT4G17500|AT2G01830|AT1G47200|AT1G07420|AT1G78240|AT3G45040|AT3G13870|AT1G01960|AT5G47200|AT2G28250…
5102	3.1944e-17	3.984e-16	27	59	1950	30472	receptor binding	AT3G49780|AT2G13790|AT5G65870|AT1G65380|AT1G31930|AT1G13620|AT2G22860|AT1G75820|AT2G26300|AT4G13195|AT3G49670|AT1G34210|AT3G28455|AT1G68765|AT3G24770|AT1G13590|AT1G71830|AT3G44735|AT5G65700|AT1G49005|AT5G51451|AT2G04025|AT3G07360|AT2G34925|AT1G20780|AT5G60810|AT5G13290
40029	3.4759e-17	4.3233e-16	54	229	1950	30472	regulation of gene expression, epigenetic	AT5G17690|AT5G23570|AT3G05040|AT3G24440|AT5G63110|AT3G49500|AT1G69440|AT4G02020|AT5G49160|AT3G17185|AT1G77300|AT5G39550|AT4G39100|AT5G58230|AT1G70070|AT4G31877|AT2G30280|AT5G23880|AT2G39175|AT5G44280|AT5G23080|AT1G69770|AT4G13940|AT1G01040|AT1G48410|AT5G13010|AT5G13570|AT2G27840|AT2G46020|AT1G54490|AT3G01460|AT5G20320|AT2G28290|AT1G60170|AT3G20740|AT4G20910|AT1G03770|AT3G07610|AT4G22140|AT1G32490…
40034	8.4654e-17	1.0501e-15	23	43	1950	30472	regulation of development, heterochronic	AT4G00650|AT1G10480|AT4G24540|AT5G15160|AT4G00450|AT4G18390|AT3G02150|AT1G27370|AT5G53950|AT1G30210|AT4G40060|AT2G31070|AT1G69440|AT5G23150|AT5G44160|AT1G55325|AT5G43270|AT5G12840|AT3G47710|AT3G15030|AT5G03790|AT5G45600|AT2G22370
9308	1.1792e-16	1.4588e-15	92	565	1950	30472	amine metabolic process	AT2G39800|AT4G31500|AT1G73500|AT1G48270|AT1G14610|AT1G25220|AT5G10330|AT4G15415|AT4G11850|AT3G63440|AT1G05010|AT5G05860|AT1G05850|AT4G14880|AT1G80600|AT5G22800|AT3G06300|AT3G54420|AT4G26200|AT1G35580|AT3G55830|AT3G02660|AT1G15110|AT1G66340|AT2G17720|AT1G31340|AT5G55810|AT3G23940|AT2G31170|AT1G11870|AT4G04350|AT5G37600|AT5G16715|AT3G15010|AT4G37770|AT1G48850|AT2G26830|AT1G01480|AT2G20610|AT1G25350…
42445	1.8965e-16	2.34e-15	41	144	1950	30472	hormone metabolic process	AT2G33860|AT5G45340|AT1G05160|AT4G31500|AT3G54430|AT4G05530|AT3G30180|AT4G24670|AT2G18120|AT1G75520|AT1G25220|AT2G45400|AT1G19790|AT3G63440|AT5G12330|AT4G15393|AT5G05860|AT3G10870|AT3G05290|AT4G15396|AT4G19230|AT4G31910|AT2G32440|AT3G50660|AT1G62360|AT5G27520|AT1G66340|AT1G19630|AT5G48000|AT5G66350|AT1G12740|AT4G14430|AT5G05690|AT4G36260|AT4G36380|AT1G48410|AT2G20610|AT1G70560|AT3G13730|AT5G05730…
6997	1.9262e-16	2.3704e-15	25	53	1950	30472	nucleus organization	AT2G35940|AT1G31470|AT4G30930|AT5G48030|AT5G62440|AT1G19520|AT2G34790|AT1G24450|AT1G31817|AT2G20585|AT5G28540|AT4G14040|AT4G13890|AT5G23420|AT5G42020|AT3G28730|AT3G03810|AT4G05440|AT2G34260|AT2G31170|AT4G33050|AT4G37890|AT2G01730|AT1G72440|AT2G20490
43169	2.1842e-16	2.6807e-15	366	3814	1950	30472	cation binding	AT3G02570|AT1G44900|AT2G34630|AT1G15220|AT4G29900|AT5G22000|AT2G30950|AT5G56930|AT4G28370|AT4G04040|AT1G75520|AT3G09090|AT5G62940|AT1G71040|AT1G19270|AT1G69640|AT5G37850|AT5G05340|AT3G44880|AT5G37055|AT1G79560|AT3G48680|AT2G02470|AT5G22800|AT3G50660|AT1G55250|AT3G19580|AT5G66730|AT2G17720|AT2G38560|AT5G44160|AT3G23940|AT4G20780|AT1G49590|AT1G30970|AT5G44280|AT5G37600|AT4G37890|AT2G22870|AT3G56090…
43167	2.2735e-16	2.7829e-15	366	3815	1950	30472	ion binding	AT3G02570|AT1G44900|AT2G34630|AT1G15220|AT4G29900|AT5G22000|AT2G30950|AT5G56930|AT4G28370|AT4G04040|AT1G75520|AT3G09090|AT5G62940|AT1G71040|AT1G19270|AT1G69640|AT5G37850|AT5G05340|AT3G44880|AT5G37055|AT1G79560|AT3G48680|AT2G02470|AT5G22800|AT3G50660|AT1G55250|AT3G19580|AT5G66730|AT2G17720|AT2G38560|AT5G44160|AT3G23940|AT4G20780|AT1G49590|AT1G30970|AT5G44280|AT5G37600|AT4G37890|AT2G22870|AT3G56090…
33205	2.318e-16	2.8299e-15	26	58	1950	30472	cell cycle cytokinesis	AT1G13980|AT4G00100|AT3G23670|AT5G18700|AT4G22970|AT5G49160|AT1G49040|AT4G01370|AT3G43210|AT1G50240|AT1G71440|AT5G05620|AT5G03540|AT3G60740|AT5G42080|AT4G26760|AT5G55230|AT1G69770|AT1G18370|AT1G01040|AT3G61650|AT3G19770|AT3G48750|AT4G14150|AT5G05970|AT5G56580
10072	2.6085e-16	3.1761e-15	14	15	1950	30472	primary shoot apical meristem specification	AT1G80490|AT1G15750|AT1G20700|AT2G34710|AT1G30490|AT1G56010|AT5G53950|AT5G27030|AT3G15880|AT5G13570|AT3G13300|AT1G36160|AT3G16830|AT4G32880
9937	2.827e-16	3.4332e-15	16	20	1950	30472	regulation of gibberellic acid mediated signaling pathway	AT3G03450|AT5G17490|AT4G24210|AT3G05120|AT5G27320|AT5G66730|AT1G66350|AT1G14920|AT1G48270|AT3G51060|AT5G66350|AT3G63010|AT4G36260|AT3G11540|AT1G07430|AT2G01570
46872	3.0204e-16	3.6584e-15	365	3809	1950	30472	metal ion binding	AT3G02570|AT1G44900|AT2G34630|AT1G15220|AT4G29900|AT5G22000|AT2G30950|AT5G56930|AT4G28370|AT4G04040|AT1G75520|AT3G09090|AT5G62940|AT1G71040|AT1G19270|AT1G69640|AT5G37850|AT5G05340|AT3G44880|AT5G37055|AT1G79560|AT3G48680|AT2G02470|AT5G22800|AT3G50660|AT1G55250|AT3G19580|AT5G66730|AT2G17720|AT2G38560|AT5G44160|AT3G23940|AT4G20780|AT1G49590|AT1G30970|AT5G44280|AT5G37600|AT4G37890|AT2G22870|AT3G56090…
9955	3.09e-16	3.733e-15	20	33	1950	30472	adaxial/abaxial pattern formation	AT5G22650|AT5G16560|AT2G34710|AT1G30490|AT3G05040|AT1G33140|AT3G52770|AT1G68310|AT5G60690|AT3G25520|AT2G37630|AT5G55250|AT3G44750|AT1G48410|AT5G28640|AT2G32700|AT2G27530|AT2G33800|AT4G32551|AT2G45450
80147	3.3031e-16	3.98e-15	17	23	1950	30472	root hair cell development	AT3G06300|AT2G35610|AT4G21060|AT3G06440|AT4G31600|AT2G17720|AT1G74800|AT3G25710|AT1G75120|AT1G19360|AT1G52240|AT3G61440|AT1G50460|AT2G24260|AT4G30980|AT5G41950|AT5G58010
6396	3.4337e-16	4.1267e-15	103	682	1950	30472	RNA processing	AT3G11964|AT4G05410|AT5G23570|AT1G24450|AT1G03910|AT1G16280|AT5G64960|AT1G02140|AT5G13480|AT5G22800|AT1G70070|AT5G64390|AT4G01560|AT4G35910|AT5G50320|AT5G16750|AT1G31660|AT1G49590|AT4G26000|AT4G14510|AT2G21660|AT1G01040|AT5G13010|AT5G42820|AT2G48120|AT1G54490|AT5G20320|AT1G15440|AT1G17980|AT5G23150|AT5G63370|AT2G34570|AT1G60170|AT1G31817|AT1G48920|AT3G01150|AT4G02990|AT1G09230|AT2G13540|AT5G41190…
6259	3.7419e-16	4.4854e-15	82	481	1950	30472	DNA metabolic process	AT1G44900|AT5G46210|AT1G05180|AT1G66730|AT1G68310|AT4G21100|AT4G02460|AT5G49160|AT3G20840|AT4G09140|AT1G74350|AT4G22910|AT1G08840|AT5G45600|AT1G78870|AT1G11190|AT5G39550|AT1G51190|AT5G58230|AT5G48720|AT1G56260|AT5G14170|AT2G30280|AT1G66740|AT3G23580|AT5G21140|AT2G06510|AT1G30010|AT4G10710|AT5G67100|AT1G48380|AT3G54180|AT2G42260|AT1G69690|AT1G26840|AT3G12380|AT1G74560|AT1G69770|AT5G64630|AT3G48750…
10029	3.968e-16	4.7442e-15	28	69	1950	30472	regulation of seed germination	AT5G17490|AT2G36270|AT1G66350|AT2G18790|AT5G39610|AT5G13200|AT1G16060|AT1G27320|AT5G35750|AT4G36930|AT1G07430|AT1G54060|AT5G56030|AT3G63060|AT4G38630|AT5G05700|AT3G03450|AT5G66730|AT1G14920|AT2G45210|AT2G19450|AT2G01830|AT5G53470|AT5G11310|AT3G47620|AT2G42620|AT3G48990|AT2G01570
60918	4.8001e-16	5.7243e-15	33	97	1950	30472	auxin transport	AT1G13980|AT2G34650|AT2G26170|AT4G08920|AT4G31820|AT3G28860|AT4G32810|AT2G36910|AT5G19530|AT3G53480|AT1G16510|AT3G22942|AT3G14370|AT5G03280|AT4G13750|AT5G55540|AT3G63420|AT2G01420|AT5G03540|AT2G47000|AT4G29810|AT4G30960|AT1G15690|AT3G02260|AT1G70940|AT2G38120|AT1G23080|AT5G13750|AT5G63420|AT1G28560|AT2G42620|AT1G77690|AT1G73590
43933	5.16e-16	6.1377e-15	79	456	1950	30472	macromolecular complex subunit organization	AT4G04885|AT3G55620|AT3G02130|AT3G08950|AT4G03430|AT1G15220|AT1G61040|AT5G18620|AT4G26430|AT2G22640|AT3G61140|AT2G18390|AT4G13510|AT1G76850|AT1G71440|AT5G37055|AT4G35540|AT1G64520|AT2G36740|AT4G01560|AT3G03110|AT5G27720|AT5G15540|AT4G05440|AT3G60740|AT3G25520|AT5G19820|AT4G29350|AT4G02570|AT3G57290|AT2G47510|AT1G74560|AT5G35220|AT4G29040|AT5G64630|AT5G39740|AT1G22920|AT2G02560|AT4G14110|AT1G04950…
9838	5.2672e-16	6.249e-15	19	30	1950	30472	abscission	AT1G68765|AT1G71830|AT5G62000|AT5G62165|AT3G21220|AT3G56350|AT3G53040|AT3G60830|AT2G44010|AT5G64667|AT3G14380|AT1G51660|AT5G54310|AT4G28490|AT3G18715|AT2G41850|AT4G35600|AT5G13790|AT1G64405
16462	5.3771e-16	6.3631e-15	114	798	1950	30472	pyrophosphatase activity	AT1G44900|AT1G09100|AT3G06010|AT1G64110|AT3G23670|AT4G29900|AT2G30950|AT3G53480|AT5G61730|AT1G16280|AT2G18390|AT5G65930|AT5G05620|AT5G58270|AT1G79560|AT1G06220|AT3G12810|AT1G70070|AT4G15570|AT5G43900|AT1G04160|AT1G01040|AT5G13010|AT3G13870|AT2G02480|AT1G62750|AT5G42270|AT5G20320|AT5G45940|AT1G61140|AT5G40010|AT3G28860|AT2G36910|AT3G09660|AT2G14120|AT4G23940|AT1G67120|AT2G11890|AT1G31770|AT5G64580…
45229	6.0164e-16	7.1015e-15	23	46	1950	30472	external encapsulating structure organization	AT4G19180|AT1G68540|AT3G59530|AT3G54150|AT1G33430|AT2G39350|AT5G65000|AT5G63370|AT3G57280|AT3G55090|AT1G63180|AT4G39400|AT3G09090|AT5G11630|AT5G05690|AT5G58100|AT5G11110|AT2G02970|AT1G77850|AT1G02050|AT2G41850|AT4G35420|AT1G27600
5886	6.6297e-16	7.8055e-15	393	4199	1950	30472	plasma membrane	AT3G11964|AT1G09100|AT4G29900|AT3G08550|AT5G64560|AT3G53480|AT5G03280|AT5G45800|AT1G79560|AT4G14880|AT4G23250|AT2G38440|AT3G21640|AT4G24580|AT4G37890|AT5G53550|AT5G55730|AT3G07360|AT2G02480|AT3G63290|AT4G38740|AT4G01430|AT4G01550|AT5G40010|AT5G17310|AT5G57800|AT2G14120|AT1G67120|AT5G64580|AT5G54650|AT3G18130|AT3G43210|AT5G44610|AT2G47000|AT4G29810|AT4G27630|AT5G67600|AT3G08590|AT5G09810|AT1G10130…
34621	6.7853e-16	7.9603e-15	68	360	1950	30472	cellular macromolecular complex subunit organization	AT4G04885|AT3G55620|AT3G08950|AT4G03430|AT1G15220|AT5G18620|AT4G26430|AT2G22640|AT3G61140|AT2G18390|AT4G13510|AT1G76850|AT1G71440|AT5G37055|AT1G64520|AT2G36740|AT4G01560|AT3G03110|AT5G27720|AT5G15540|AT4G05440|AT3G60740|AT3G25520|AT5G19820|AT4G29350|AT4G02570|AT3G57290|AT1G74560|AT5G35220|AT4G29040|AT5G64630|AT5G39740|AT1G22920|AT2G02560|AT4G14110|AT1G62750|AT3G53020|AT5G20320|AT1G15440|AT1G02090…
9914	6.7956e-16	7.9603e-15	33	98	1950	30472	hormone transport	AT1G13980|AT2G34650|AT2G26170|AT4G08920|AT4G31820|AT3G28860|AT4G32810|AT2G36910|AT5G19530|AT3G53480|AT1G16510|AT3G22942|AT3G14370|AT5G03280|AT4G13750|AT5G55540|AT3G63420|AT2G01420|AT5G03540|AT2G47000|AT4G29810|AT4G30960|AT1G15690|AT3G02260|AT1G70940|AT2G38120|AT1G23080|AT5G13750|AT5G63420|AT1G28560|AT2G42620|AT1G77690|AT1G73590
16818	7.061e-16	8.2503e-15	114	801	1950	30472	hydrolase activity, acting on acid anhydrides, in phosphorus-containing anhydrides	AT1G44900|AT1G09100|AT3G06010|AT1G64110|AT3G23670|AT4G29900|AT2G30950|AT3G53480|AT5G61730|AT1G16280|AT2G18390|AT5G65930|AT5G05620|AT5G58270|AT1G79560|AT1G06220|AT3G12810|AT1G70070|AT4G15570|AT5G43900|AT1G04160|AT1G01040|AT5G13010|AT3G13870|AT2G02480|AT1G62750|AT5G42270|AT5G20320|AT5G45940|AT1G61140|AT5G40010|AT3G28860|AT2G36910|AT3G09660|AT2G14120|AT4G23940|AT1G67120|AT2G11890|AT1G31770|AT5G64580…
17111	7.7657e-16	9.0508e-15	110	761	1950	30472	nucleoside-triphosphatase activity	AT1G44900|AT1G09100|AT3G06010|AT1G64110|AT3G23670|AT4G29900|AT2G30950|AT3G53480|AT5G61730|AT1G16280|AT2G18390|AT5G65930|AT5G05620|AT5G58270|AT1G79560|AT1G06220|AT3G12810|AT1G70070|AT4G15570|AT5G43900|AT1G04160|AT1G01040|AT5G13010|AT3G13870|AT2G02480|AT1G62750|AT5G42270|AT5G20320|AT1G61140|AT5G40010|AT3G28860|AT2G36910|AT3G09660|AT2G14120|AT4G23940|AT1G67120|AT2G11890|AT1G31770|AT5G64580|AT1G31930…
44106	8.0691e-16	9.3808e-15	81	478	1950	30472	cellular amine metabolic process	AT2G39800|AT4G31500|AT1G73500|AT1G48270|AT1G14610|AT1G25220|AT5G10330|AT4G15415|AT4G11850|AT1G05010|AT4G14880|AT1G80600|AT5G22800|AT4G26200|AT1G35580|AT3G02660|AT1G15110|AT1G31340|AT5G55810|AT3G23940|AT2G31170|AT1G11870|AT4G04350|AT5G37600|AT5G16715|AT3G15010|AT4G37770|AT1G48850|AT2G26830|AT1G01480|AT2G20610|AT1G25350|AT3G48110|AT4G34740|AT2G43750|AT4G11280|AT4G17300|AT3G15730|AT1G55180|AT3G55400…
10017	8.4279e-16	9.7734e-15	29	76	1950	30472	red or far-red light signaling pathway	AT1G10470|AT4G02440|AT1G02090|AT2G32950|AT5G42970|AT4G21100|AT4G26430|AT2G18790|AT1G25540|AT3G61140|AT1G22770|AT2G25930|AT5G11260|AT2G46370|AT1G09530|AT4G16780|AT5G14250|AT1G09570|AT2G40080|AT1G28520|AT1G71230|AT2G26990|AT2G42400|AT1G22920|AT5G56280|AT2G46340|AT4G14110|AT4G38740|AT2G26670
19538	8.7528e-16	1.0125e-14	414	4487	1950	30472	protein metabolic process	AT4G24210|AT1G10570|AT4G21060|AT1G09100|AT2G30950|AT5G63110|AT2G15790|AT5G02190|AT5G45800|AT2G27530|AT1G79560|AT3G05290|AT5G22800|AT4G23250|AT1G55250|AT1G09570|AT2G17720|AT2G38560|AT3G21640|AT1G69770|AT3G07360|AT2G04660|AT4G12570|AT4G38740|AT3G55400|AT4G00100|AT1G09000|AT1G33430|AT5G63370|AT5G64580|AT5G05560|AT5G51020|AT4G38630|AT4G00330|AT4G30920|AT4G29810|AT4G26300|AT1G67490|AT2G39990|AT1G13950…
910	1.0428e-15	1.2032e-14	27	66	1950	30472	cytokinesis	AT1G13980|AT4G00100|AT3G23670|AT5G18700|AT4G22970|AT5G49160|AT1G49040|AT4G01370|AT3G43210|AT1G50240|AT1G71440|AT5G05620|AT5G03540|AT3G60740|AT5G42080|AT4G26760|AT5G55230|AT2G22870|AT1G69770|AT1G18370|AT1G01040|AT3G61650|AT3G19770|AT3G48750|AT4G14150|AT5G05970|AT5G56580
9960	1.0647e-15	1.2254e-14	17	24	1950	30472	endosperm development	AT3G57860|AT2G34260|AT4G22970|AT4G02020|AT2G35230|AT2G42260|AT1G69670|AT2G18390|AT5G54650|AT2G44190|AT2G41630|AT1G53580|AT4G24900|AT1G02680|AT3G20070|AT5G41700|AT1G26830
151	1.1377e-15	1.3062e-14	50	216	1950	30472	ubiquitin ligase complex	AT4G24210|AT5G46210|AT5G23730|AT4G05410|AT3G56990|AT3G54650|AT4G21100|AT1G49040|AT4G29860|AT3G44600|AT5G13480|AT3G01090|AT3G05090|AT5G58230|AT1G26830|AT4G29830|AT5G52820|AT4G02570|AT4G34460|AT4G03190|AT2G42620|AT2G04660|AT2G47990|AT2G46340|AT3G08850|AT1G15440|AT2G32950|AT2G41500|AT5G42190|AT3G20740|AT4G35560|AT2G20000|AT4G31160|AT2G18290|AT5G05560|AT1G27340|AT1G04020|AT5G57360|AT2G34260|AT4G21530…
16071	1.3385e-15	1.5329e-14	67	356	1950	30472	mRNA metabolic process	AT3G23070|AT4G04885|AT3G11964|AT4G03430|AT3G55220|AT2G48160|AT4G03110|AT3G20800|AT1G74350|AT1G03910|AT4G10760|AT5G64960|AT3G13300|AT5G13480|AT1G77180|AT5G53180|AT1G70070|AT5G64390|AT2G06990|AT5G27720|AT3G04680|AT5G23880|AT1G30010|AT4G27490|AT5G23080|AT4G14510|AT2G21660|AT1G01040|AT1G27650|AT5G13010|AT5G13570|AT5G42820|AT2G48120|AT1G54490|AT4G18750|AT2G32550|AT5G16780|AT2G41500|AT3G55200|AT1G17980…
10648	1.4803e-15	1.6912e-14	28	72	1950	30472	negative regulation of cell communication	AT5G17490|AT3G52430|AT1G66350|AT1G48270|AT3G51060|AT3G11540|AT1G07430|AT5G08335|AT2G26300|AT5G59220|AT3G03450|AT2G25170|AT5G23320|AT2G17820|AT3G51550|AT1G66340|AT5G63980|AT1G14920|AT3G03773|AT4G02450|AT4G24580|AT5G66350|AT5G10720|AT4G34460|AT5G11310|AT4G36260|AT2G01570|AT1G01720
22403	1.6861e-15	1.9216e-14	46	188	1950	30472	cell cycle phase	AT1G05180|AT1G80260|AT3G57860|AT1G11060|AT4G31400|AT3G09660|AT3G54650|AT4G22970|AT4G02460|AT4G09140|AT5G57880|AT3G63480|AT2G23430|AT3G18730|AT2G20000|AT1G01690|AT4G22910|AT2G18290|AT5G05560|AT5G37630|AT1G78770|AT1G06660|AT5G48720|AT5G48600|AT5G19400|AT1G61030|AT2G06510|AT5G15540|AT4G11920|AT4G21530|AT3G59550|AT5G42080|AT2G34680|AT4G26760|AT3G54180|AT3G12280|AT2G42260|AT1G75950|AT4G34160|AT5G55230…
44459	1.743e-15	1.9815e-14	162	1334	1950	30472	plasma membrane part	AT3G51460|AT5G23730|AT2G37620|AT3G49660|AT4G29900|AT5G18700|AT3G53480|AT4G02020|AT3G29810|AT2G01820|AT5G58710|AT2G21710|AT1G76850|AT1G02780|AT4G23250|AT5G42020|AT5G25460|AT4G11920|AT3G60740|AT4G24580|AT5G37600|AT4G37890|AT2G21660|AT3G44110|AT4G13940|AT1G74720|AT5G55730|AT2G41210|AT4G16370|AT3G63290|AT1G73590|AT2G46340|AT3G25290|AT2G30490|AT3G01780|AT3G08970|AT4G24190|AT2G36910|AT1G67120|AT1G31930…
71489	1.8981e-15	2.1526e-14	29	78	1950	30472	cellular response to red or far red light	AT1G10470|AT4G02440|AT1G02090|AT2G32950|AT5G42970|AT4G21100|AT4G26430|AT2G18790|AT1G25540|AT3G61140|AT1G22770|AT2G25930|AT5G11260|AT2G46370|AT1G09530|AT4G16780|AT5G14250|AT1G09570|AT2G40080|AT1G28520|AT1G71230|AT2G26990|AT2G42400|AT1G22920|AT5G56280|AT2G46340|AT4G14110|AT4G38740|AT2G26670
16817	2.0609e-15	2.3315e-14	114	813	1950	30472	hydrolase activity, acting on acid anhydrides	AT1G44900|AT1G09100|AT3G06010|AT1G64110|AT3G23670|AT4G29900|AT2G30950|AT3G53480|AT5G61730|AT1G16280|AT2G18390|AT5G65930|AT5G05620|AT5G58270|AT1G79560|AT1G06220|AT3G12810|AT1G70070|AT4G15570|AT5G43900|AT1G04160|AT1G01040|AT5G13010|AT3G13870|AT2G02480|AT1G62750|AT5G42270|AT5G20320|AT5G45940|AT1G61140|AT5G40010|AT3G28860|AT2G36910|AT3G09660|AT2G14120|AT4G23940|AT1G67120|AT2G11890|AT1G31770|AT5G64580…
6519	2.2503e-15	2.5396e-14	114	814	1950	30472	cellular amino acid and derivative metabolic process	AT2G39800|AT4G08920|AT1G12910|AT1G73500|AT1G48270|AT2G45400|AT5G05980|AT5G05340|AT1G05010|AT5G05860|AT4G14880|AT1G80600|AT5G22800|AT3G06300|AT1G35580|AT1G15110|AT2G17720|AT3G23940|AT5G37600|AT3G15010|AT4G37770|AT4G13940|AT2G26830|AT2G20610|AT1G17020|AT2G43750|AT2G26670|AT2G30490|AT3G55400|AT2G32950|AT2G37040|AT5G63890|AT3G53180|AT3G44540|AT5G60540|AT4G34710|AT3G11340|AT5G22500|AT4G13890|AT2G28880…
42803	2.4493e-15	2.7574e-14	37	127	1950	30472	protein homodimerization activity	AT1G13980|AT2G35940|AT3G01680|AT4G08920|AT3G07780|AT5G49020|AT3G59420|AT5G17710|AT1G17840|AT3G06930|AT4G39400|AT2G18790|AT5G39610|AT5G12330|AT5G03680|AT3G13300|AT2G44950|AT1G01510|AT4G16780|AT1G04400|AT4G24660|AT4G00650|AT4G24540|AT1G15750|AT3G01670|AT1G55250|AT1G09570|AT5G48840|AT3G57230|AT2G37630|AT1G30970|AT5G48160|AT1G74660|AT2G40080|AT5G03150|AT5G13570|AT5G13790
51302	3.0825e-15	3.4534e-14	21	40	1950	30472	regulation of cell division	AT4G01540|AT1G08260|AT5G22220|AT3G22780|AT3G23980|AT3G59420|AT5G62440|AT2G22475|AT1G69380|AT1G26870|AT2G20000|AT5G03150|AT5G10480|AT1G21410|AT5G51020|AT3G13530|AT5G05970|AT1G51170|AT2G41230|AT1G01510|AT3G51800
10374	3.0825e-15	3.4534e-14	21	40	1950	30472	stomatal complex development	AT1G80370|AT1G14350|AT2G15430|AT5G65420|AT3G57230|AT4G26690|AT1G49040|AT1G12860|AT5G65590|AT3G54180|AT2G18790|AT3G12280|AT2G02820|AT5G10440|AT3G63440|AT4G14723|AT3G61650|AT1G75640|AT5G05620|AT1G63700|AT5G55480
9657	3.2129e-15	3.5909e-14	48	206	1950	30472	plastid organization	AT5G22640|AT5G67570|AT1G62750|AT5G23730|AT3G54990|AT3G08010|AT3G24560|AT1G03160|AT2G30950|AT5G46290|AT4G23940|AT1G32500|AT5G55580|AT3G46740|AT5G12130|AT5G02250|AT3G10670|AT2G21170|AT5G58270|AT5G51020|AT3G47450|AT2G26300|AT3G54710|AT5G59220|AT4G31780|AT2G28000|AT5G18570|AT1G35680|AT4G02990|AT5G19620|AT3G07430|AT1G56200|AT5G23040|AT1G11870|AT2G31270|AT5G64050|AT5G35220|AT5G63420|AT2G43090|AT1G06430…
48354	3.8294e-15	4.2593e-14	13	14	1950	30472	mucilage biosynthetic process involved in seed coat development	AT2G35620|AT3G06440|AT3G29810|AT5G63800|AT4G36890|AT1G21070|AT1G02720|AT3G10380|AT5G62620|AT5G03540|AT3G46550|AT3G10320|AT3G13540
48829	3.8294e-15	4.2593e-14	13	14	1950	30472	root cap development	AT1G33280|AT3G59420|AT2G38120|AT3G53180|AT4G30080|AT1G26870|AT2G20000|AT4G29040|AT5G01240|AT1G77690|AT1G79580|AT2G28350|AT2G21050
71215	3.9268e-15	4.3572e-14	48	207	1950	30472	cellular response to abscisic acid stimulus	AT3G55620|AT5G46210|AT5G47100|AT1G34120|AT3G08550|AT2G36270|AT4G21540|AT1G48270|AT1G69270|AT1G18080|AT4G17615|AT1G27320|AT3G18130|AT5G35750|AT5G13680|AT5G01560|AT3G11220|AT3G01090|AT2G26300|AT3G48360|AT3G63060|AT1G12240|AT3G55830|AT1G05470|AT2G17820|AT3G51550|AT3G56860|AT3G19580|AT5G63980|AT2G39175|AT4G21670|AT5G10720|AT4G35890|AT4G34460|AT1G18390|AT3G45640|AT1G48630|AT5G46845|AT4G18010|AT1G05680…
9739	5.0644e-15	5.606e-14	42	164	1950	30472	response to gibberellin stimulus	AT5G17490|AT4G24210|AT3G09600|AT3G05120|AT1G80340|AT2G36270|AT1G66350|AT1G48270|AT2G36890|AT1G18080|AT3G47710|AT2G46830|AT3G11540|AT5G11260|AT5G44610|AT1G09530|AT3G11440|AT2G26300|AT3G03450|AT1G10480|AT4G24540|AT1G12240|AT5G15160|AT2G25170|AT5G27320|AT1G66340|AT5G47390|AT2G38560|AT2G37630|AT1G67030|AT1G14920|AT1G68360|AT5G66350|AT2G32460|AT1G74660|AT3G63010|AT1G74500|AT5G06100|AT3G47620|AT1G01060…
35467	6.0292e-15	6.658e-14	27	70	1950	30472	negative regulation of signaling pathway	AT5G17490|AT3G52430|AT1G66350|AT1G48270|AT3G51060|AT3G11540|AT1G07430|AT5G08335|AT2G26300|AT5G59220|AT3G03450|AT2G25170|AT5G23320|AT2G17820|AT3G51550|AT1G66340|AT1G14920|AT3G03773|AT4G02450|AT4G24580|AT5G66350|AT5G10720|AT4G34460|AT5G11310|AT4G36260|AT2G01570|AT1G01720
10208	6.6875e-15	7.3498e-14	20	37	1950	30472	pollen wall assembly	AT4G19180|AT1G68540|AT3G59530|AT3G54150|AT1G33430|AT2G39350|AT5G65000|AT5G63370|AT3G57280|AT3G55090|AT4G39400|AT3G09090|AT5G05690|AT5G58100|AT5G11110|AT2G02970|AT1G77850|AT1G02050|AT4G35420|AT1G27600
10927	6.6875e-15	7.3498e-14	20	37	1950	30472	cellular component assembly involved in morphogenesis	AT4G19180|AT1G68540|AT3G59530|AT3G54150|AT1G33430|AT2G39350|AT5G65000|AT5G63370|AT3G57280|AT3G55090|AT4G39400|AT3G09090|AT5G05690|AT5G58100|AT5G11110|AT2G02970|AT1G77850|AT1G02050|AT4G35420|AT1G27600
16879	7.1015e-15	7.7864e-14	74	431	1950	30472	ligase activity, forming carbon-nitrogen bonds	AT1G66610|AT5G41480|AT1G66650|AT3G24560|AT3G54650|AT4G28370|AT4G27880|AT5G37930|AT5G05980|AT5G57740|AT1G78870|AT2G46370|AT2G44950|AT5G39550|AT1G26830|AT2G39810|AT1G66620|AT5G21140|AT5G48840|AT1G66660|AT3G26810|AT5G37600|AT3G61590|AT1G79810|AT4G37890|AT3G61790|AT3G10160|AT4G03190|AT3G63530|AT2G42620|AT4G36800|AT3G07360|AT2G02760|AT2G04660|AT1G20780|AT1G36160|AT1G08910|AT4G33210|AT2G26350|AT4G12570…
44432	7.8276e-15	8.5421e-14	75	441	1950	30472	endoplasmic reticulum part	AT3G51460|AT1G64990|AT3G54010|AT1G19300|AT3G58170|AT5G03080|AT5G03280|AT1G71040|AT1G27320|AT5G28540|AT1G69640|AT5G35750|AT2G03120|AT5G08335|AT1G34190|AT4G16340|AT3G06300|AT5G42020|AT1G15110|AT3G57650|AT5G23320|AT5G17400|AT1G66340|AT2G17720|AT1G32870|AT5G14850|AT3G21640|AT1G23010|AT1G01120|AT2G01830|AT5G53470|AT2G16280|AT1G07420|AT3G45040|AT3G13870|AT1G21750|AT5G23630|AT5G47200|AT5G23670|AT1G05160…
71212	7.8276e-15	8.5421e-14	75	441	1950	30472	subsynaptic reticulum	AT3G51460|AT1G64990|AT3G54010|AT1G19300|AT3G58170|AT5G03080|AT5G03280|AT1G71040|AT1G27320|AT5G28540|AT1G69640|AT5G35750|AT2G03120|AT5G08335|AT1G34190|AT4G16340|AT3G06300|AT5G42020|AT1G15110|AT3G57650|AT5G23320|AT5G17400|AT1G66340|AT2G17720|AT1G32870|AT5G14850|AT3G21640|AT1G23010|AT1G01120|AT2G01830|AT5G53470|AT2G16280|AT1G07420|AT3G45040|AT3G13870|AT1G21750|AT5G23630|AT5G47200|AT5G23670|AT1G05160…
10227	8.4952e-15	9.2488e-14	17	26	1950	30472	floral organ abscission	AT1G68765|AT1G71830|AT5G62000|AT3G21220|AT3G56350|AT3G53040|AT3G60830|AT2G44010|AT5G64667|AT3G14380|AT1G51660|AT5G54310|AT4G28490|AT3G18715|AT2G41850|AT5G13790|AT1G64405
16567	1.1891e-14	1.2916e-13	86	549	1950	30472	protein ubiquitination	AT4G24210|AT5G46210|AT1G66610|AT1G05180|AT3G52590|AT2G32410|AT1G66650|AT4G31820|AT5G22000|AT3G54650|AT4G28370|AT4G21100|AT4G27880|AT5G37930|AT2G01620|AT4G22910|AT5G57740|AT1G78870|AT5G37890|AT2G44950|AT5G39550|AT3G48360|AT1G26830|AT2G39810|AT1G55250|AT1G66620|AT5G21140|AT1G66660|AT4G11920|AT4G02570|AT3G26810|AT5G44280|AT3G61590|AT1G79810|AT3G61790|AT4G03190|AT3G63530|AT2G42620|AT3G07360|AT2G02760…
10091	1.3268e-14	1.4377e-13	20	38	1950	30472	trichome branching	AT1G17920|AT1G66740|AT5G20490|AT1G80350|AT2G38440|AT3G23980|AT5G42080|AT4G20780|AT2G42260|AT2G46600|AT5G65930|AT4G22910|AT2G27600|AT5G38110|AT2G02480|AT5G41315|AT4G38600|AT5G28646|AT1G01510|AT3G12400
279	1.3572e-14	1.4672e-13	44	183	1950	30472	M phase	AT1G05180|AT1G80260|AT3G57860|AT1G11060|AT4G31400|AT3G09660|AT3G54650|AT4G22970|AT4G02460|AT4G09140|AT5G57880|AT3G63480|AT2G20000|AT1G01690|AT4G22910|AT2G18290|AT5G05560|AT5G37630|AT1G78770|AT1G06660|AT5G48720|AT5G48600|AT5G19400|AT1G61030|AT2G06510|AT5G15540|AT4G11920|AT4G21530|AT3G59550|AT5G42080|AT2G34680|AT4G26760|AT3G54180|AT3G12280|AT2G42260|AT1G75950|AT4G34160|AT5G55230|AT1G47200|AT3G48750…
48582	1.7886e-14	1.9291e-13	25	62	1950	30472	positive regulation of post-embryonic development	AT4G04885|AT1G10670|AT4G31820|AT5G62000|AT4G02560|AT1G68050|AT4G39400|AT1G25540|AT1G22770|AT3G10390|AT3G03090|AT1G07430|AT1G26830|AT1G04400|AT4G22140|AT3G22590|AT5G08370|AT2G19450|AT5G05690|AT1G28520|AT3G44110|AT2G42400|AT3G48990|AT2G43410|AT5G55390
16881	1.8788e-14	2.0216e-13	67	375	1950	30472	acid-amino acid ligase activity	AT1G66610|AT5G41480|AT1G66650|AT3G54650|AT4G28370|AT4G27880|AT5G37930|AT5G05980|AT5G57740|AT1G78870|AT2G46370|AT2G44950|AT5G39550|AT1G26830|AT2G39810|AT1G66620|AT5G21140|AT5G48840|AT1G66660|AT3G26810|AT3G61590|AT1G79810|AT4G37890|AT3G61790|AT3G10160|AT4G03190|AT3G63530|AT2G42620|AT4G36800|AT3G07360|AT2G02760|AT2G04660|AT1G20780|AT1G08910|AT4G33210|AT2G26350|AT4G12570|AT4G02440|AT2G32950|AT1G16890…
3674	2.3471e-14	2.5197e-13	1840	27323	1950	30472	molecular_function	AT5G42890|AT3G56990|AT2G30950|AT3G53480|AT2G15790|AT4G35460|AT5G03280|AT1G03910|AT1G43130|AT2G24260|AT5G37055|AT1G79560|AT2G02470|AT5G13080|AT5G22800|AT2G25110|AT5G19620|AT3G19580|AT2G38440|AT4G37650|AT4G14510|AT1G69770|AT5G53550|AT2G34090|AT1G78240|AT2G04660|AT1G01720|AT2G02480|AT3G63290|AT1G77390|AT1G10670|AT5G45940|AT5G17430|AT1G67120|AT5G63370|AT5G49070|AT1G69780|AT3G44540|AT3G43210|AT1G80100…
33043	2.6899e-14	2.8811e-13	34	116	1950	30472	regulation of organelle organization	AT3G01460|AT1G80260|AT3G57860|AT3G24440|AT3G54870|AT5G17410|AT4G22970|AT3G44600|AT2G18290|AT5G04470|AT1G77300|AT1G04020|AT5G37055|AT5G44610|AT5G45600|AT5G39550|AT4G39100|AT4G16340|AT4G22140|AT1G79280|AT2G06210|AT2G38440|AT5G56600|AT4G21530|AT4G29350|AT2G19760|AT3G12280|AT2G42260|AT5G55230|AT3G16640|AT3G48430|AT5G05970|AT4G30160|AT5G55390
42175	2.713e-14	2.8991e-13	70	405	1950	30472	nuclear membrane-endoplasmic reticulum network	AT3G51460|AT1G64990|AT3G54010|AT1G19300|AT3G58170|AT5G03080|AT5G03280|AT1G71040|AT1G27320|AT1G69640|AT5G35750|AT2G03120|AT5G08335|AT1G34190|AT4G16340|AT3G06300|AT1G15110|AT3G57650|AT5G23320|AT5G17400|AT1G66340|AT2G17720|AT1G32870|AT5G14850|AT3G21640|AT5G43070|AT1G23010|AT1G01120|AT2G01830|AT5G53470|AT2G16280|AT1G47200|AT1G07420|AT3G45040|AT3G13870|AT5G23630|AT5G47200|AT5G23670|AT1G05160|AT3G25230…
44430	2.8816e-14	3.0721e-13	55	274	1950	30472	cytoskeletal part	AT3G09840|AT3G07980|AT3G23670|AT5G17410|AT5G18700|AT3G04630|AT4G01370|AT3G63480|AT1G30825|AT5G65930|AT3G44200|AT1G52240|AT2G44190|AT5G05620|AT5G43900|AT5G20490|AT1G80350|AT1G04160|AT1G65010|AT3G60740|AT4G02570|AT2G34680|AT4G26760|AT2G43790|AT1G17580|AT4G27060|AT1G13180|AT3G48750|AT4G14150|AT2G04660|AT1G80260|AT4G01710|AT3G54870|AT4G22970|AT1G14830|AT1G68060|AT1G31810|AT3G16630|AT2G20000|AT4G21800…
8213	2.9429e-14	3.1231e-13	23	53	1950	30472	protein amino acid alkylation	AT4G29830|AT2G31650|AT2G06210|AT3G22590|AT5G23320|AT3G24440|AT5G24330|AT5G49020|AT3G20740|AT3G06930|AT2G22475|AT1G76710|AT5G11530|AT1G69770|AT1G51450|AT5G09790|AT1G77300|AT1G79730|AT5G42400|AT2G23380|AT5G08335|AT1G62830|AT1G04870
6479	2.9429e-14	3.1231e-13	23	53	1950	30472	protein amino acid methylation	AT4G29830|AT2G31650|AT2G06210|AT3G22590|AT5G23320|AT3G24440|AT5G24330|AT5G49020|AT3G20740|AT3G06930|AT2G22475|AT1G76710|AT5G11530|AT1G69770|AT1G51450|AT5G09790|AT1G77300|AT1G79730|AT5G42400|AT2G23380|AT5G08335|AT1G62830|AT1G04870
46983	3.0083e-14	3.1852e-13	85	548	1950	30472	protein dimerization activity	AT5G65050|AT3G01680|AT4G08920|AT1G59640|AT3G07780|AT2G15430|AT3G59420|AT3G51060|AT1G17840|AT1G63180|AT3G06930|AT2G18790|AT5G07120|AT3G47710|AT5G03680|AT2G24260|AT4G32551|AT3G13300|AT1G43850|AT1G09530|AT2G44950|AT4G16780|AT1G04400|AT1G35460|AT4G24660|AT4G24540|AT2G03060|AT1G15750|AT1G77080|AT5G65080|AT1G64440|AT1G55250|AT1G09570|AT5G48840|AT3G58780|AT5G65640|AT2G14210|AT2G37630|AT1G30970|AT5G48160…
44262	3.3844e-14	3.5753e-13	114	846	1950	30472	cellular carbohydrate metabolic process	AT3G02570|AT4G21060|AT3G08550|AT5G49720|AT4G04040|AT2G34590|AT1G19300|AT3G29810|AT5G66460|AT3G01640|AT1G50460|AT1G74030|AT2G22240|AT5G42810|AT1G27600|AT3G04120|AT2G35610|AT1G35580|AT5G22510|AT1G12240|AT3G55830|AT3G04240|AT5G16910|AT3G20440|AT5G11110|AT2G20610|AT1G78240|AT3G45040|AT1G10670|AT3G02230|AT5G24400|AT1G34120|AT5G17310|AT5G15650|AT1G33430|AT1G23190|AT1G02720|AT1G79500|AT2G21170|AT5G52920…
45165	3.6842e-14	3.8831e-13	21	44	1950	30472	cell fate commitment	AT5G23630|AT1G14740|AT5G24520|AT2G33860|AT5G16560|AT4G24972|AT1G55350|AT2G41500|AT3G63500|AT5G14750|AT5G07280|AT5G44280|AT3G12280|AT4G08150|AT4G13750|AT3G12680|AT5G60450|AT1G03770|AT5G41315|AT1G01510|AT5G02820
10588	4.4297e-14	4.6501e-13	14	18	1950	30472	cotyledon vascular tissue pattern formation	AT5G16780|AT1G05470|AT2G32280|AT1G31770|AT1G17840|AT2G36120|AT4G24670|AT1G70560|AT1G48920|AT5G22720|AT2G46990|AT3G09070|AT4G18750|AT2G21050
6260	4.432e-14	4.6501e-13	37	138	1950	30472	DNA replication	AT1G44900|AT3G57860|AT1G66730|AT3G09660|AT3G20780|AT1G74350|AT4G22910|AT5G55300|AT5G04470|AT1G08840|AT3G54710|AT3G27060|AT5G58230|AT1G08260|AT5G24630|AT3G28730|AT3G23580|AT3G25100|AT5G27740|AT2G06510|AT1G15570|AT4G32700|AT1G30010|AT4G10710|AT1G65470|AT5G67100|AT1G48380|AT2G31270|AT3G54180|AT2G42260|AT1G69690|AT1G21690|AT1G26840|AT3G48750|AT2G02480|AT4G38600|AT1G19080
33554	6.114e-14	6.4004e-13	115	864	1950	30472	cellular response to stress	AT5G46210|AT3G52430|AT4G02380|AT4G21100|AT3G56350|AT4G03110|AT4G29860|AT4G35460|AT5G03280|AT1G71040|AT1G27320|AT5G05340|AT5G05860|AT1G78870|AT2G22240|AT2G02470|AT5G13080|AT3G10920|AT5G42020|AT5G14170|AT5G21140|AT4G10710|AT1G23010|AT3G12380|AT2G01830|AT1G51660|AT5G06720|AT2G02760|AT1G54490|AT1G21750|AT2G03050|AT4G38740|AT5G17290|AT3G08970|AT2G32950|AT3G25230|AT3G09660|AT1G16890|AT3G19190|AT1G60170…
6520	7.0885e-14	7.4038e-13	71	422	1950	30472	cellular amino acid metabolic process	AT2G39800|AT4G31500|AT1G73500|AT1G48270|AT1G14610|AT1G25220|AT5G10330|AT4G15415|AT1G05010|AT4G14880|AT1G80600|AT5G22800|AT4G26200|AT1G35580|AT3G02660|AT1G31340|AT5G55810|AT3G23940|AT2G31170|AT1G11870|AT4G04350|AT5G37600|AT5G16715|AT3G15010|AT4G37770|AT1G48850|AT1G01480|AT2G20610|AT1G25350|AT3G48110|AT4G34740|AT2G43750|AT4G11280|AT4G17300|AT3G55400|AT2G16500|AT3G06350|AT3G59760|AT2G37040|AT5G63890…
8180	7.1777e-14	7.48e-13	11	11	1950	30472	signalosome	AT3G61140|AT1G02090|AT5G14250|AT5G42970|AT1G71230|AT2G26990|AT1G22920|AT5G56280|AT3G57290|AT4G14110|AT4G26430
9743	7.4776e-14	7.7751e-13	52	255	1950	30472	response to carbohydrate stimulus	AT5G46210|AT5G47220|AT1G09100|AT3G08550|AT3G52430|AT4G01250|AT5G03280|AT1G27320|AT5G03680|AT3G01090|AT1G77180|AT3G48360|AT3G04120|AT3G50060|AT3G19580|AT1G66340|AT2G39175|AT4G33050|AT4G17500|AT2G01830|AT2G18060|AT3G45640|AT4G23810|AT3G44350|AT1G34180|AT4G02280|AT2G13790|AT2G36270|AT1G31930|AT2G17040|AT1G18080|AT5G08790|AT1G69780|AT3G11220|AT2G26300|AT1G05630|AT4G38630|AT4G17490|AT4G24400|AT3G49530…
911	7.7772e-14	8.0684e-13	23	55	1950	30472	cytokinesis by cell plate formation	AT1G13980|AT4G00100|AT3G23670|AT5G18700|AT3G60740|AT4G22970|AT5G42080|AT1G49040|AT4G26760|AT4G01370|AT5G55230|AT1G18370|AT1G01040|AT3G43210|AT1G50240|AT3G61650|AT1G71440|AT3G19770|AT5G05620|AT3G48750|AT5G03540|AT4G14150|AT5G05970
16571	8.8262e-14	9.1158e-13	20	41	1950	30472	histone methylation	AT4G29830|AT2G31650|AT2G06210|AT3G22590|AT3G24440|AT5G24330|AT5G49020|AT3G20740|AT3G06930|AT2G22475|AT1G76710|AT5G11530|AT1G69770|AT1G51450|AT5G09790|AT1G77300|AT1G79730|AT5G42400|AT2G23380|AT1G62830
16585	8.8262e-14	9.1158e-13	20	41	1950	30472	chromatin remodeling complex	AT4G22140|AT3G06400|AT2G33610|AT3G21060|AT3G49660|AT3G24440|AT5G18620|AT4G02020|AT3G20740|AT2G47620|AT3G12380|AT1G51450|AT1G18450|AT5G37055|AT2G46040|AT4G30200|AT1G21700|AT3G12810|AT4G39100|AT5G58230
48285	9.2129e-14	9.494e-13	37	141	1950	30472	organelle fission	AT3G57860|AT1G11060|AT4G31400|AT4G05410|AT3G54650|AT2G14120|AT5G46290|AT4G23940|AT4G22970|AT1G14830|AT2G20000|AT4G22910|AT2G18290|AT5G05560|AT5G37630|AT5G51020|AT1G78770|AT5G48600|AT3G07430|AT1G61030|AT5G15540|AT4G11920|AT4G21530|AT3G59550|AT5G42080|AT2G34680|AT4G26760|AT3G54180|AT2G42260|AT1G75950|AT4G34160|AT5G55230|AT1G47200|AT3G48750|AT2G04660|AT3G07160|AT4G33650
9524	1.0141e-13	1.0428e-12	29	89	1950	30472	phragmoplast	AT3G09840|AT3G01780|AT3G23670|AT5G18700|AT1G71820|AT1G14830|AT1G68060|AT1G31810|AT3G15380|AT5G54650|AT3G43210|AT1G50240|AT5G03540|AT3G01610|AT4G02570|AT5G42080|AT4G02350|AT2G34680|AT2G19760|AT4G26760|AT2G43790|AT1G75950|AT5G55230|AT3G10380|AT1G18370|AT4G14150|AT5G05970|AT3G10220|AT5G56580
10476	1.2017e-13	1.2329e-12	26	72	1950	30472	gibberellin mediated signaling pathway	AT5G17490|AT4G24210|AT3G05120|AT1G80340|AT1G66350|AT1G48270|AT1G18080|AT3G47710|AT3G11540|AT5G11260|AT1G09530|AT3G11440|AT2G26300|AT3G03450|AT1G10480|AT5G15160|AT5G27320|AT1G67030|AT1G14920|AT1G68360|AT5G66350|AT2G32460|AT3G63010|AT1G74500|AT5G06100|AT2G01570
15630	1.3545e-13	1.3866e-12	49	234	1950	30472	microtubule cytoskeleton	AT3G09840|AT3G07980|AT3G23670|AT5G17410|AT5G18700|AT3G04630|AT4G01370|AT3G63480|AT5G65930|AT3G44200|AT1G52240|AT2G44190|AT5G05620|AT1G80350|AT1G65010|AT3G60740|AT4G02570|AT2G34680|AT4G26760|AT2G43790|AT4G27060|AT3G48750|AT4G14150|AT2G04660|AT1G80260|AT3G54870|AT4G22970|AT1G14830|AT1G68060|AT1G31810|AT3G16630|AT2G20000|AT4G21800|AT3G43210|AT5G44610|AT5G28646|AT1G01510|AT1G01950|AT5G24310|AT5G22370…
278	1.3754e-13	1.4048e-12	34	122	1950	30472	mitotic cell cycle	AT1G80260|AT3G57860|AT1G11060|AT4G31400|AT3G54650|AT4G22970|AT1G48270|AT2G23430|AT3G18730|AT2G20000|AT4G22910|AT2G18290|AT5G05560|AT5G37630|AT1G78770|AT5G48600|AT1G61030|AT5G15540|AT4G11920|AT4G21530|AT3G59550|AT5G42080|AT2G34680|AT4G26760|AT3G54180|AT3G12280|AT2G42260|AT1G75950|AT4G34160|AT5G55230|AT1G47200|AT3G48750|AT2G04660|AT3G07160
5789	1.6248e-13	1.656e-12	68	401	1950	30472	endoplasmic reticulum membrane	AT3G51460|AT1G64990|AT3G54010|AT1G19300|AT3G58170|AT5G03080|AT5G03280|AT1G71040|AT1G27320|AT1G69640|AT5G35750|AT2G03120|AT5G08335|AT1G34190|AT4G16340|AT3G06300|AT1G15110|AT3G57650|AT5G23320|AT5G17400|AT1G66340|AT2G17720|AT1G32870|AT5G14850|AT3G21640|AT1G23010|AT1G01120|AT2G01830|AT5G53470|AT2G16280|AT1G07420|AT3G45040|AT3G13870|AT5G23630|AT5G47200|AT5G23670|AT1G05160|AT3G25230|AT1G59820|AT1G16570…
6955	1.7648e-13	1.7947e-12	62	347	1950	30472	immune response	AT5G47220|AT5G21150|AT4G31500|AT5G23570|AT3G52430|AT3G49500|AT1G69440|AT4G03110|AT2G39200|AT4G01370|AT5G03280|AT4G11850|AT3G44880|AT5G05780|AT2G46370|AT5G37770|AT2G44950|AT2G22240|AT5G42810|AT1G04400|AT3G54420|AT1G20900|AT1G55250|AT1G32230|AT1G66340|AT2G43790|AT4G34460|AT2G21660|AT4G08480|AT3G45640|AT4G29040|AT1G01040|AT1G51660|AT1G48410|AT4G23810|AT5G13010|AT4G38740|AT5G20320|AT1G55020|AT1G08030…
71370	2.539e-13	2.5763e-12	26	74	1950	30472	cellular response to gibberellin stimulus	AT5G17490|AT4G24210|AT3G05120|AT1G80340|AT1G66350|AT1G48270|AT3G47710|AT3G11540|AT5G11260|AT1G09530|AT3G11440|AT2G26300|AT3G03450|AT1G10480|AT1G12240|AT5G15160|AT5G27320|AT1G67030|AT1G14920|AT1G68360|AT5G66350|AT2G32460|AT3G63010|AT1G74500|AT5G06100|AT2G01570
2376	2.9748e-13	3.0119e-12	63	360	1950	30472	immune system process	AT5G47220|AT5G21150|AT4G31500|AT5G23570|AT3G52430|AT3G49500|AT1G69440|AT4G03110|AT4G03550|AT2G39200|AT4G01370|AT5G03280|AT4G11850|AT3G44880|AT5G05780|AT2G46370|AT5G37770|AT2G44950|AT2G22240|AT5G42810|AT1G04400|AT3G54420|AT1G20900|AT1G55250|AT1G32230|AT1G66340|AT2G43790|AT4G34460|AT2G21660|AT4G08480|AT3G45640|AT4G29040|AT1G01040|AT1G51660|AT1G48410|AT4G23810|AT5G13010|AT4G38740|AT5G20320|AT1G55020…
55046	3.1851e-13	3.2177e-12	21	48	1950	30472	microgametogenesis	AT1G60490|AT1G64110|AT3G23670|AT5G22000|AT5G57800|AT3G04620|AT3G12280|AT5G12840|AT4G35560|AT3G20910|AT5G06100|AT1G18450|AT2G46040|AT4G14150|AT5G05850|AT3G11330|AT3G11440|AT1G74260|AT1G06520|AT5G59030|AT4G14220
10078	3.6838e-13	3.7135e-12	12	14	1950	30472	maintenance of root meristem identity	AT3G06010|AT4G29040|AT3G08550|AT3G07780|AT3G11260|AT5G19310|AT1G70560|AT1G04020|AT4G28980|AT5G48160|AT2G20140|AT4G24670
6338	3.8037e-13	3.826e-12	19	39	1950	30472	chromatin remodeling	AT4G22140|AT3G06400|AT2G36740|AT3G33520|AT2G33610|AT2G28290|AT5G18620|AT1G65470|AT3G52280|AT2G47620|AT5G55300|AT5G64630|AT1G18450|AT5G37055|AT1G21700|AT2G46020|AT4G39100|AT5G58230|AT1G04400
43414	3.8306e-13	3.8447e-12	34	126	1950	30472	macromolecule methylation	AT3G01460|AT5G20320|AT3G24440|AT5G49020|AT5G49160|AT3G20740|AT3G06930|AT1G76710|AT4G20910|AT1G51450|AT4G10760|AT1G77300|AT2G21070|AT5G08335|AT5G39550|AT1G62830|AT3G07610|AT4G29830|AT2G30280|AT2G31650|AT2G06210|AT3G22590|AT5G23320|AT5G24330|AT2G22475|AT5G11530|AT1G69770|AT5G04560|AT5G09790|AT4G20400|AT1G79730|AT5G42400|AT2G23380|AT1G04870
43161	3.9158e-13	3.9133e-12	31	106	1950	30472	proteasomal ubiquitin-dependent protein catabolic process	AT1G09100|AT3G54650|AT5G64760|AT4G28370|AT4G21100|AT1G30000|AT2G15530|AT1G45050|AT2G18290|AT5G28540|AT1G27340|AT5G05780|AT5G37890|AT2G20140|AT4G14220|AT5G09900|AT4G38630|AT5G57360|AT3G05530|AT1G64520|AT4G21530|AT2G01735|AT3G58040|AT1G14400|AT4G34040|AT4G29040|AT3G11270|AT3G63530|AT1G21410|AT2G02760|AT3G13672
10498	3.9158e-13	3.9133e-12	31	106	1950	30472	proteasomal protein catabolic process	AT1G09100|AT3G54650|AT5G64760|AT4G28370|AT4G21100|AT1G30000|AT2G15530|AT1G45050|AT2G18290|AT5G28540|AT1G27340|AT5G05780|AT5G37890|AT2G20140|AT4G14220|AT5G09900|AT4G38630|AT5G57360|AT3G05530|AT1G64520|AT4G21530|AT2G01735|AT3G58040|AT1G14400|AT4G34040|AT4G29040|AT3G11270|AT3G63530|AT1G21410|AT2G02760|AT3G13672
44212	4.6637e-13	4.6506e-12	37	148	1950	30472	DNA regulatory region binding	AT5G18560|AT5G16560|AT5G14000|AT1G12910|AT5G63790|AT1G68130|AT5G10510|AT1G52880|AT1G51450|AT3G11020|AT5G60200|AT5G42630|AT1G54060|AT1G02220|AT1G10480|AT1G20700|AT2G31650|AT2G36400|AT3G19580|AT4G37180|AT5G66730|AT4G29230|AT3G55370|AT3G61850|AT5G60690|AT1G19850|AT5G24590|AT1G67030|AT1G68360|AT5G43270|AT2G46400|AT5G61600|AT2G18060|AT1G53320|AT1G01060|AT2G01570|AT3G15510
9934	4.9657e-13	4.9411e-12	14	20	1950	30472	regulation of meristem structural organization	AT2G26170|AT3G49670|AT1G62360|AT1G55350|AT4G24190|AT3G22780|AT1G65470|AT3G18730|AT1G75820|AT5G65700|AT2G46920|AT2G42620|AT1G04020|AT5G46700
65003	5.3867e-13	5.3486e-12	68	411	1950	30472	macromolecular complex assembly	AT3G55620|AT3G02130|AT3G08950|AT4G03430|AT1G15220|AT1G61040|AT4G26430|AT2G22640|AT3G61140|AT2G18390|AT4G13510|AT1G76850|AT1G71440|AT4G35540|AT1G64520|AT4G01560|AT3G03110|AT5G27720|AT5G15540|AT4G05440|AT3G60740|AT3G25520|AT5G19820|AT4G02570|AT3G57290|AT2G47510|AT1G74560|AT5G35220|AT4G29040|AT5G64630|AT5G39740|AT1G22920|AT2G02560|AT4G14110|AT1G04950|AT3G53020|AT1G15440|AT1G02090|AT5G16780|AT4G01710…
10223	5.4241e-13	5.3627e-12	13	17	1950	30472	secondary shoot formation	AT3G01460|AT2G26170|AT3G03990|AT1G55580|AT3G24770|AT4G32810|AT5G53950|AT5G61480|AT3G14067|AT1G77300|AT5G02030|AT2G34925|AT2G27990
10346	5.4241e-13	5.3627e-12	13	17	1950	30472	shoot formation	AT3G01460|AT2G26170|AT3G03990|AT1G55580|AT3G24770|AT4G32810|AT5G53950|AT5G61480|AT3G14067|AT1G77300|AT5G02030|AT2G34925|AT2G27990
9911	6.8099e-13	6.7184e-12	19	40	1950	30472	positive regulation of flower development	AT4G22140|AT4G04885|AT1G10670|AT3G22590|AT4G31820|AT5G62000|AT5G08370|AT4G02560|AT1G68050|AT4G39400|AT1G25540|AT5G05690|AT3G44110|AT3G10390|AT3G03090|AT2G43410|AT5G55390|AT1G26830|AT1G04400
9740	6.8876e-13	6.7806e-12	25	71	1950	30472	gibberellic acid mediated signaling pathway	AT5G17490|AT4G24210|AT3G05120|AT1G80340|AT1G66350|AT1G48270|AT3G47710|AT3G11540|AT5G11260|AT1G09530|AT3G11440|AT2G26300|AT3G03450|AT1G10480|AT5G15160|AT5G27320|AT1G67030|AT1G14920|AT1G68360|AT5G66350|AT2G32460|AT3G63010|AT1G74500|AT5G06100|AT2G01570
9926	7.1972e-13	7.0704e-12	28	89	1950	30472	auxin polar transport	AT1G13980|AT2G34650|AT2G26170|AT4G31820|AT3G28860|AT4G32810|AT2G36910|AT5G19530|AT3G53480|AT3G22942|AT3G14370|AT5G03280|AT4G13750|AT5G55540|AT3G63420|AT2G01420|AT2G47000|AT4G30960|AT1G15690|AT3G02260|AT1G70940|AT2G38120|AT1G23080|AT5G13750|AT1G28560|AT2G42620|AT1G77690|AT1G73590
6397	7.3378e-13	7.1932e-12	57	313	1950	30472	mRNA processing	AT3G23070|AT4G04885|AT3G11964|AT4G03430|AT3G55220|AT2G48160|AT1G74350|AT1G03910|AT5G64960|AT3G13300|AT5G13480|AT1G77180|AT5G53180|AT1G70070|AT5G64390|AT2G06990|AT5G27720|AT3G04680|AT5G23880|AT1G30010|AT5G23080|AT4G14510|AT2G21660|AT1G01040|AT1G27650|AT5G13010|AT5G13570|AT5G42820|AT2G48120|AT1G54490|AT4G18750|AT5G16780|AT2G41500|AT3G55200|AT1G17980|AT5G23150|AT5G63370|AT1G60170|AT2G35340|AT5G08230…
226	7.3922e-13	7.2312e-12	26	77	1950	30472	microtubule cytoskeleton organization	AT1G80260|AT1G11060|AT5G49720|AT5G17410|AT5G18700|AT4G01370|AT5G57880|AT1G20090|AT2G18390|AT3G43210|AT3G44200|AT2G44190|AT1G75640|AT5G05620|AT5G44610|AT5G28646|AT1G01510|AT1G80350|AT5G19400|AT1G61030|AT3G60740|AT4G26760|AT1G75950|AT5G08120|AT5G55230|AT3G61650
10119	8.0702e-13	7.8778e-12	22	55	1950	30472	regulation of stomatal movement	AT1G09540|AT2G32950|AT1G66340|AT5G27150|AT4G03560|AT5G10720|AT4G33050|AT2G19690|AT3G16640|AT5G03280|AT2G21660|AT1G20090|AT5G13750|AT1G51140|AT2G25930|AT2G26650|AT2G46370|AT4G33950|AT2G26300|AT3G15730|AT2G26670|AT4G16110
45995	8.1106e-13	7.9006e-12	11	12	1950	30472	regulation of embryonic development	AT2G19450|AT1G10670|AT1G52880|AT1G50030|AT2G32700|AT4G32551|AT3G48110|AT3G13530|AT5G57390|AT3G07050|AT3G15510
9556	1.0623e-12	1.0326e-11	17	32	1950	30472	microsporogenesis	AT5G45550|AT3G08510|AT2G36850|AT1G34210|AT1G15110|AT1G32310|AT1G71830|AT5G18700|AT5G07280|AT1G31810|AT3G44540|AT3G44550|AT3G07160|AT1G06660|AT1G77390|AT5G22500|AT5G57790
34622	1.1048e-12	1.0717e-11	57	316	1950	30472	cellular macromolecular complex assembly	AT3G55620|AT3G08950|AT4G03430|AT1G15220|AT4G26430|AT2G22640|AT3G61140|AT2G18390|AT4G13510|AT1G76850|AT1G71440|AT1G64520|AT4G01560|AT3G03110|AT5G27720|AT5G15540|AT4G05440|AT3G60740|AT3G25520|AT5G19820|AT4G02570|AT3G57290|AT1G74560|AT5G35220|AT4G29040|AT5G64630|AT5G39740|AT1G22920|AT2G02560|AT4G14110|AT3G53020|AT1G15440|AT1G02090|AT5G16780|AT4G01710|AT1G03060|AT4G00026|AT1G67120|AT1G60170|AT5G47040…
338	1.127e-12	1.091e-11	10	10	1950	30472	protein deneddylation	AT3G61140|AT1G02090|AT5G14250|AT5G42970|AT1G71230|AT2G26990|AT1G22920|AT5G56280|AT4G14110|AT4G26430
19953	1.1704e-12	1.1305e-11	31	110	1950	30472	sexual reproduction	AT1G64110|AT2G41500|AT4G30930|AT3G04690|AT3G54650|AT3G59760|AT5G57800|AT4G35560|AT2G20000|AT3G11440|AT4G14880|AT1G06520|AT2G20140|AT3G03690|AT2G06510|AT3G51550|AT1G64980|AT3G04620|AT4G02590|AT3G12280|AT1G71270|AT5G06100|AT4G29040|AT1G18450|AT4G36920|AT2G46040|AT3G07160|AT2G47470|AT2G43750|AT5G59030|AT4G37750
31399	1.1929e-12	1.1499e-11	19	41	1950	30472	regulation of protein modification process	AT4G22140|AT1G79280|AT2G06210|AT3G57860|AT3G24440|AT4G11920|AT2G42260|AT3G44600|AT4G22910|AT2G18290|AT5G10480|AT1G77300|AT1G04020|AT3G48430|AT5G37055|AT5G45600|AT5G55390|AT4G39100|AT4G38740
9611	1.37e-12	1.3179e-11	44	207	1950	30472	response to wounding	AT3G29035|AT2G30490|AT3G51460|AT1G55020|AT2G28290|AT3G25230|AT5G63770|AT2G37040|AT4G08500|AT1G74930|AT1G17420|AT1G73500|AT1G17840|AT4G02260|AT4G01370|AT5G08790|AT5G03280|AT3G44540|AT1G01470|AT3G16470|AT3G48520|AT4G34710|AT4G32551|AT2G46370|AT4G16760|AT1G05630|AT5G22500|AT3G48360|AT4G24220|AT3G54420|AT4G32940|AT1G66340|AT4G21670|AT1G19180|AT3G45640|AT5G64930|AT1G72520|AT3G44550|AT2G32700|AT5G05730…
42446	1.3859e-12	1.3304e-11	30	104	1950	30472	hormone biosynthetic process	AT5G45340|AT1G05160|AT4G31500|AT3G54430|AT3G30180|AT4G24670|AT2G18120|AT1G75520|AT1G25220|AT2G45400|AT1G19790|AT5G12330|AT4G15393|AT4G15396|AT4G19230|AT4G31910|AT2G32440|AT3G50660|AT1G62360|AT1G19630|AT5G48000|AT5G66350|AT1G12740|AT5G05690|AT4G36260|AT4G36380|AT2G20610|AT1G70560|AT3G13730|AT5G05730
31461	1.3925e-12	1.334e-11	39	168	1950	30472	cullin-RING ubiquitin ligase complex	AT4G24210|AT5G46210|AT5G23730|AT3G08850|AT1G15440|AT4G05410|AT3G56990|AT2G32950|AT2G41500|AT3G54650|AT4G21100|AT5G42190|AT1G49040|AT3G20740|AT4G29860|AT3G44600|AT4G35560|AT4G31160|AT1G27340|AT5G13480|AT3G05090|AT5G58230|AT5G57360|AT4G29830|AT5G52820|AT2G34260|AT4G02570|AT2G19520|AT1G75950|AT4G34460|AT4G29380|AT4G03190|AT4G15900|AT3G62980|AT2G42620|AT1G21410|AT5G05970|AT2G47990|AT2G46340
30258	1.4241e-12	1.3614e-11	27	85	1950	30472	lipid modification	AT2G32010|AT1G60490|AT5G42890|AT1G55020|AT1G34120|AT3G07020|AT1G17420|AT3G06810|AT3G22400|AT1G72970|AT3G51840|AT3G05290|AT4G16760|AT1G05630|AT5G64070|AT1G05470|AT3G04460|AT5G27520|AT4G29010|AT2G35690|AT4G14430|AT1G79810|AT1G72520|AT4G18010|AT1G04010|AT1G43620|AT2G26350
19787	1.5984e-12	1.5249e-11	61	355	1950	30472	small conjugating protein ligase activity	AT1G66610|AT1G66650|AT3G54650|AT4G28370|AT4G27880|AT5G37930|AT5G57740|AT1G78870|AT2G44950|AT5G39550|AT1G26830|AT2G39810|AT1G66620|AT5G21140|AT1G66660|AT3G26810|AT3G61590|AT1G79810|AT4G37890|AT3G61790|AT4G03190|AT3G63530|AT2G42620|AT4G36800|AT3G07360|AT2G02760|AT2G04660|AT1G20780|AT1G08910|AT4G33210|AT2G26350|AT4G12570|AT4G02440|AT2G32950|AT1G16890|AT5G42190|AT1G68050|AT1G45050|AT3G60350|AT2G18290…
34660	1.6481e-12	1.569e-11	59	337	1950	30472	ncRNA metabolic process	AT3G55620|AT3G11964|AT4G05410|AT3G24560|AT1G14610|AT1G16280|AT1G17690|AT2G21070|AT5G13680|AT5G22800|AT5G18570|AT4G20060|AT4G01560|AT3G02660|AT3G04680|AT4G35910|AT5G50320|AT4G27490|AT5G63980|AT5G16750|AT1G31660|AT2G31170|AT1G11870|AT4G04350|AT5G16715|AT2G17250|AT1G04635|AT1G01040|AT1G25350|AT3G48110|AT1G54490|AT2G47990|AT4G17300|AT2G20490|AT2G45330|AT3G55400|AT1G15440|AT5G16780|AT2G34570|AT5G59980…
7346	1.9113e-12	1.8159e-11	22	57	1950	30472	regulation of mitotic cell cycle	AT1G79280|AT1G80370|AT3G57860|AT1G66740|AT5G14250|AT5G42970|AT1G15570|AT4G05440|AT4G21530|AT4G37650|AT2G42260|AT3G16640|AT2G20000|AT3G15150|AT2G18290|AT5G04470|AT1G71230|AT5G38110|AT1G22920|AT5G05970|AT1G06230|AT2G44950
46394	1.9965e-12	1.8891e-11	78	520	1950	30472	carboxylic acid biosynthetic process	AT2G39800|AT4G31500|AT3G54010|AT5G23570|AT4G05450|AT2G38110|AT5G46290|AT1G30100|AT1G48270|AT1G49430|AT1G25220|AT5G10330|AT1G69640|AT3G01090|AT4G14880|AT1G80600|AT2G35690|AT3G23940|AT5G37600|AT1G01120|AT2G16280|AT1G48850|AT1G19440|AT2G20610|AT1G74960|AT1G53000|AT1G70560|AT1G07420|AT1G02050|AT1G36160|AT2G43750|AT1G10670|AT1G05160|AT1G55020|AT1G80340|AT3G06350|AT3G59760|AT5G57800|AT1G68530|AT5G63890…
16053	1.9965e-12	1.8891e-11	78	520	1950	30472	organic acid biosynthetic process	AT2G39800|AT4G31500|AT3G54010|AT5G23570|AT4G05450|AT2G38110|AT5G46290|AT1G30100|AT1G48270|AT1G49430|AT1G25220|AT5G10330|AT1G69640|AT3G01090|AT4G14880|AT1G80600|AT2G35690|AT3G23940|AT5G37600|AT1G01120|AT2G16280|AT1G48850|AT1G19440|AT2G20610|AT1G74960|AT1G53000|AT1G70560|AT1G07420|AT1G02050|AT1G36160|AT2G43750|AT1G10670|AT1G05160|AT1G55020|AT1G80340|AT3G06350|AT3G59760|AT5G57800|AT1G68530|AT5G63890…
48511	2.0706e-12	1.9553e-11	32	119	1950	30472	rhythmic process	AT1G10470|AT3G09600|AT4G08920|AT3G26640|AT1G12910|AT1G68050|AT2G18790|AT2G46830|AT1G22770|AT5G05660|AT2G25930|AT2G21070|AT3G11540|AT4G36930|AT3G54810|AT1G77180|AT3G48360|AT1G04400|AT5G57360|AT2G18915|AT4G04970|AT5G24470|AT5G61380|AT4G00150|AT1G69690|AT2G44680|AT5G64813|AT2G40080|AT2G21660|AT1G01060|AT4G30200|AT5G37260
48449	2.0798e-12	1.9599e-11	15	25	1950	30472	floral organ formation	AT5G64390|AT2G06990|AT3G02000|AT2G31650|AT4G37180|AT1G17980|AT5G07280|AT4G39400|AT3G44600|AT5G05690|AT4G20910|AT4G36920|AT1G22920|AT3G12810|AT4G38630
5938	2.6921e-12	2.5318e-11	24	69	1950	30472	cell cortex	AT3G56640|AT5G56600|AT5G17410|AT1G71820|AT4G29350|AT4G02350|AT2G34680|AT4G24580|AT2G19760|AT1G14830|AT3G08800|AT4G26760|AT1G68060|AT1G21170|AT5G55230|AT3G10380|AT3G44200|AT4G27060|AT1G76850|AT3G61650|AT5G05620|AT3G48750|AT5G03540|AT5G28646
48878	3.497e-12	3.2821e-11	63	380	1950	30472	chemical homeostasis	AT1G05180|AT1G10130|AT4G08920|AT2G32410|AT4G29140|AT3G06810|AT3G57280|AT3G51060|AT2G18790|AT3G62270|AT1G50460|AT2G01420|AT5G58270|AT5G58070|AT2G02470|AT5G42810|AT1G04400|AT3G50660|AT2G35690|AT1G19630|AT5G48000|AT4G37650|AT5G55250|AT1G69690|AT2G01830|AT3G56090|AT5G53550|AT2G27600|AT1G79530|AT4G16370|AT1G73590|AT4G33210|AT5G23630|AT5G01600|AT5G45340|AT1G05160|AT1G08030|AT1G70730|AT1G23190|AT3G30180…
9658	3.5295e-12	3.3059e-11	36	150	1950	30472	chloroplast organization	AT5G22640|AT5G67570|AT1G62750|AT5G23730|AT3G54990|AT3G08010|AT3G24560|AT5G46290|AT4G23940|AT5G55580|AT3G46740|AT5G02250|AT2G21170|AT5G58270|AT5G51020|AT3G54710|AT5G59220|AT2G28000|AT5G18570|AT1G35680|AT5G19620|AT3G07430|AT1G56200|AT5G23040|AT1G11870|AT2G31270|AT5G64050|AT5G35220|AT5G63420|AT2G43090|AT2G48120|AT4G34740|AT4G01800|AT2G46340|AT3G63190|AT4G33650
10162	4.6237e-12	4.3133e-11	15	26	1950	30472	seed dormancy	AT4G24210|AT5G22650|AT1G55250|AT2G38560|AT1G30100|AT1G67890|AT1G48270|AT4G29860|AT5G53470|AT3G63210|AT3G44750|AT1G07430|AT2G27840|AT2G44950|AT4G19230
22611	4.6237e-12	4.3133e-11	15	26	1950	30472	dormancy process	AT4G24210|AT5G22650|AT1G55250|AT2G38560|AT1G30100|AT1G67890|AT1G48270|AT4G29860|AT5G53470|AT3G63210|AT3G44750|AT1G07430|AT2G27840|AT2G44950|AT4G19230
6631	4.706e-12	4.3812e-11	54	300	1950	30472	fatty acid metabolic process	AT5G42890|AT3G54010|AT5G23570|AT2G38110|AT5G46290|AT4G05530|AT3G06810|AT1G49430|AT1G72970|AT1G69640|AT3G48520|AT2G46370|AT3G01090|AT3G05290|AT3G05970|AT5G27520|AT2G35690|AT4G14430|AT1G79810|AT1G01120|AT2G16280|AT1G19440|AT1G74960|AT3G44550|AT1G07420|AT1G36160|AT3G15730|AT2G26350|AT1G10670|AT1G55020|AT5G57800|AT1G68530|AT1G17420|AT3G22400|AT1G73680|AT5G49070|AT3G44540|AT3G51840|AT4G16760|AT5G22500…
40011	5.7044e-12	5.3001e-11	19	44	1950	30472	locomotion	AT1G60420|AT1G15330|AT1G67960|AT3G07780|AT4G08850|AT5G14850|AT3G22200|AT4G28650|AT5G48160|AT2G15890|AT2G43790|AT5G60410|AT5G07370|AT3G45640|AT5G61760|AT2G41630|AT1G02140|AT5G51020|AT4G15570
10152	6.5283e-12	6.0534e-11	12	16	1950	30472	pollen maturation	AT5G23630|AT3G02130|AT2G03060|AT1G34210|AT4G03190|AT3G62980|AT1G71830|AT1G12820|AT1G18750|AT5G54800|AT3G26810|AT1G14830
51130	8.8418e-12	8.1822e-11	20	50	1950	30472	positive regulation of cellular component organization	AT3G05530|AT1G80260|AT1G09100|AT3G24440|AT2G38440|AT5G17410|AT5G63980|AT4G22970|AT1G13950|AT5G55230|AT3G16640|AT4G29040|AT2G18290|AT1G77300|AT5G13010|AT1G04020|AT4G32551|AT5G39550|AT5G55390|AT2G20140
10584	9.7853e-12	9.0373e-11	15	27	1950	30472	pollen exine formation	AT4G19180|AT1G68540|AT3G59530|AT3G54150|AT1G33430|AT5G65000|AT5G63370|AT4G39400|AT3G09090|AT5G05690|AT5G58100|AT2G02970|AT1G02050|AT4G35420|AT1G27600
5575	1.0255e-11	9.452e-11	1927	29376	1950	30472	cellular_component	AT5G42890|AT3G56990|AT2G30950|AT3G53480|AT2G15790|AT4G35460|AT5G03280|AT1G03910|AT1G43130|AT2G24260|AT5G37055|AT1G79560|AT2G02470|AT5G13080|AT5G22800|AT2G25110|AT5G19620|AT3G19580|AT2G38440|AT4G37650|AT4G14510|AT1G69770|AT5G53550|AT5G55730|AT2G34090|AT1G78240|AT2G04660|AT1G01720|AT2G02480|AT3G63290|AT1G77390|AT1G10670|AT5G45940|AT5G17430|AT5G27230|AT1G67120|AT5G63370|AT5G49070|AT1G69780|AT3G44540…
22604	1.0465e-11	9.627e-11	23	67	1950	30472	regulation of cell morphogenesis	AT2G03060|AT2G36850|AT4G04970|AT1G60420|AT4G08920|AT5G56600|AT5G63980|AT5G23260|AT1G18750|AT4G03550|AT4G28880|AT4G28860|AT4G38430|AT2G20000|AT2G41630|AT4G32551|AT5G44610|AT3G13530|AT3G07160|AT1G01510|AT4G16340|AT3G46290|AT5G54380
42752	1.2617e-11	1.1583e-10	17	36	1950	30472	regulation of circadian rhythm	AT1G10470|AT2G18915|AT4G08920|AT2G32950|AT3G26640|AT1G12910|AT4G02570|AT2G18790|AT2G44680|AT2G40080|AT2G46830|AT1G22770|AT1G01060|AT5G11260|AT1G77180|AT1G04400|AT5G57360
9753	1.3156e-11	1.2054e-10	42	204	1950	30472	response to jasmonic acid stimulus	AT5G17490|AT3G09600|AT5G47220|AT1G55020|AT1G17420|AT1G66350|AT4G23100|AT2G36890|AT4G01370|AT2G18790|AT1G25540|AT2G46410|AT5G08790|AT5G03280|AT2G46830|AT3G16470|AT4G34710|AT2G46370|AT3G48360|AT3G15500|AT3G03450|AT1G15750|AT3G50660|AT1G32230|AT4G32940|AT5G47390|AT2G37630|AT4G02570|AT1G14920|AT2G39730|AT2G43790|AT4G35890|AT4G34460|AT1G19180|AT5G64930|AT1G01060|AT2G01570|AT4G11280|AT3G15510|AT4G14110…
16607	1.377e-11	1.2592e-10	22	62	1950	30472	nuclear speck	AT2G06990|AT2G41500|AT1G60220|AT3G24440|AT1G09570|AT5G63370|AT5G23080|AT2G18790|AT5G60410|AT1G03910|AT3G12680|AT4G10760|AT1G27650|AT2G27100|AT5G37055|AT5G42820|AT1G02140|AT1G06220|AT1G61620|AT1G77180|AT2G46340|AT1G02330
87	1.3899e-11	1.2659e-10	29	106	1950	30472	M phase of mitotic cell cycle	AT3G57860|AT1G11060|AT4G31400|AT3G54650|AT4G22970|AT2G20000|AT4G22910|AT2G18290|AT5G05560|AT5G37630|AT1G78770|AT5G48600|AT1G61030|AT5G15540|AT4G11920|AT4G21530|AT3G59550|AT5G42080|AT2G34680|AT4G26760|AT3G54180|AT2G42260|AT1G75950|AT4G34160|AT5G55230|AT1G47200|AT3G48750|AT2G04660|AT3G07160
7067	1.3899e-11	1.2659e-10	29	106	1950	30472	mitosis	AT3G57860|AT1G11060|AT4G31400|AT3G54650|AT4G22970|AT2G20000|AT4G22910|AT2G18290|AT5G05560|AT5G37630|AT1G78770|AT5G48600|AT1G61030|AT5G15540|AT4G11920|AT4G21530|AT3G59550|AT5G42080|AT2G34680|AT4G26760|AT3G54180|AT2G42260|AT1G75950|AT4G34160|AT5G55230|AT1G47200|AT3G48750|AT2G04660|AT3G07160
48441	1.4723e-11	1.3357e-10	13	20	1950	30472	petal development	AT3G02000|AT1G59640|AT1G17980|AT2G39175|AT5G66870|AT2G31160|AT4G36380|AT5G03680|AT3G13730|AT5G46845|AT3G12810|AT2G28350|AT2G22370
48465	1.4723e-11	1.3357e-10	13	20	1950	30472	corolla development	AT3G02000|AT1G59640|AT1G17980|AT2G39175|AT5G66870|AT2G31160|AT4G36380|AT5G03680|AT3G13730|AT5G46845|AT3G12810|AT2G28350|AT2G22370
51707	1.6028e-11	1.4513e-10	139	1215	1950	30472	response to other organism	AT5G21150|AT5G23570|AT3G52430|AT4G02380|AT1G73500|AT1G25540|AT5G03280|AT1G27320|AT5G64960|AT3G44880|AT1G05010|AT5G05620|AT5G37055|AT2G44950|AT2G22240|AT5G42810|AT3G12810|AT1G80600|AT2G25110|AT3G10920|AT4G23250|AT1G12240|AT1G32230|AT2G35690|AT5G54800|AT2G37630|AT3G26810|AT5G11630|AT2G01830|AT5G61600|AT4G03190|AT5G53550|AT1G53320|AT1G01040|AT1G51660|AT1G48410|AT3G12140|AT4G23810|AT5G13010|AT5G06720…
5794	1.6204e-11	1.4644e-10	134	1157	1950	30472	Golgi apparatus	AT4G21060|AT3G49780|AT1G64990|AT3G08550|AT5G51640|AT5G49720|AT5G49680|AT1G19300|AT3G29810|AT1G48270|AT5G07120|AT1G71040|AT1G75120|AT2G18390|AT1G69640|AT1G43130|AT5G05340|AT1G27600|AT3G06300|AT2G35610|AT3G55830|AT2G17720|AT5G65000|AT5G43070|AT5G16910|AT5G58440|AT1G21070|AT1G47200|AT1G78240|AT5G06720|AT3G13870|AT2G43750|AT1G01960|AT5G47200|AT2G30490|AT3G02230|AT2G34850|AT5G22740|AT3G27530|AT1G08030…
42330	1.6765e-11	1.4975e-10	16	32	1950	30472	taxis	AT1G60420|AT1G15330|AT1G67960|AT4G08850|AT5G14850|AT3G22200|AT4G28650|AT2G15890|AT2G43790|AT5G60410|AT5G07370|AT3G45640|AT5G61760|AT2G41630|AT1G02140|AT4G15570
50918	1.6765e-11	1.4975e-10	16	32	1950	30472	positive chemotaxis	AT1G60420|AT1G15330|AT1G67960|AT4G08850|AT5G14850|AT3G22200|AT4G28650|AT2G15890|AT2G43790|AT5G60410|AT5G07370|AT3G45640|AT5G61760|AT2G41630|AT1G02140|AT4G15570
10183	1.6765e-11	1.4975e-10	16	32	1950	30472	pollen tube guidance	AT1G60420|AT1G15330|AT1G67960|AT4G08850|AT5G14850|AT3G22200|AT4G28650|AT2G15890|AT2G43790|AT5G60410|AT5G07370|AT3G45640|AT5G61760|AT2G41630|AT1G02140|AT4G15570
10252	1.6765e-11	1.4975e-10	16	32	1950	30472	auxin homeostasis	AT1G05180|AT2G32410|AT1G70940|AT1G23080|AT4G29140|AT3G51060|AT5G55250|AT5G06140|AT1G69690|AT3G16640|AT4G36260|AT5G05560|AT2G01420|AT1G05630|AT1G73590|AT4G33210
6935	1.6765e-11	1.4975e-10	16	32	1950	30472	chemotaxis	AT1G60420|AT1G15330|AT1G67960|AT4G08850|AT5G14850|AT3G22200|AT4G28650|AT2G15890|AT2G43790|AT5G60410|AT5G07370|AT3G45640|AT5G61760|AT2G41630|AT1G02140|AT4G15570
7626	1.6765e-11	1.4975e-10	16	32	1950	30472	locomotory behavior	AT1G60420|AT1G15330|AT1G67960|AT4G08850|AT5G14850|AT3G22200|AT4G28650|AT2G15890|AT2G43790|AT5G60410|AT5G07370|AT3G45640|AT5G61760|AT2G41630|AT1G02140|AT4G15570
9607	1.7362e-11	1.5479e-10	144	1275	1950	30472	response to biotic stimulus	AT5G21150|AT5G23570|AT3G52430|AT4G02380|AT1G73500|AT1G25540|AT5G03280|AT1G27320|AT5G64960|AT3G44880|AT1G05010|AT5G05620|AT5G37055|AT2G44950|AT2G22240|AT5G42810|AT3G12810|AT1G80600|AT2G25110|AT3G10920|AT4G23250|AT1G64520|AT1G12240|AT1G32230|AT2G35690|AT5G54800|AT2G37630|AT3G26810|AT5G11630|AT2G01830|AT5G61600|AT4G03190|AT5G53550|AT1G53320|AT1G01040|AT1G51660|AT1G48410|AT3G12140|AT4G23810|AT5G13010…
10388	1.7688e-11	1.5739e-10	9	9	1950	30472	cullin deneddylation	AT3G61140|AT1G02090|AT5G14250|AT5G42970|AT2G26990|AT1G22920|AT5G56280|AT4G14110|AT4G26430
31967	1.8269e-11	1.6224e-10	134	1159	1950	30472	organelle envelope	AT5G22640|AT3G08950|AT1G15220|AT3G05040|AT2G30950|AT5G63110|AT5G14220|AT5G46290|AT2G34590|AT3G57280|AT2G37860|AT4G35460|AT1G78630|AT5G63510|AT2G38280|AT1G50460|AT3G44880|AT5G05620|AT5G58270|AT1G79560|AT3G10110|AT3G05290|AT3G48680|AT4G31780|AT3G04120|AT1G64520|AT5G40480|AT2G31530|AT1G15110|AT5G19620|AT2G40400|AT5G27520|AT5G23040|AT5G54800|AT5G43070|AT1G02410|AT4G17500|AT3G56090|AT1G47200|AT1G07420…
31975	1.9394e-11	1.7191e-10	134	1160	1950	30472	envelope	AT5G22640|AT3G08950|AT1G15220|AT3G05040|AT2G30950|AT5G63110|AT5G14220|AT5G46290|AT2G34590|AT3G57280|AT2G37860|AT4G35460|AT1G78630|AT5G63510|AT2G38280|AT1G50460|AT3G44880|AT5G05620|AT5G58270|AT1G79560|AT3G10110|AT3G05290|AT3G48680|AT4G31780|AT3G04120|AT1G64520|AT5G40480|AT2G31530|AT1G15110|AT5G19620|AT2G40400|AT5G27520|AT5G23040|AT5G54800|AT5G43070|AT1G02410|AT4G17500|AT3G56090|AT1G47200|AT1G07420…
9741	1.9454e-11	1.7211e-10	25	81	1950	30472	response to brassinosteroid stimulus	AT1G13260|AT1G17560|AT2G13790|AT3G20780|AT1G48270|AT4G39400|AT1G75080|AT1G14000|AT1G34210|AT3G50660|AT2G40400|AT3G51550|AT1G71830|AT2G42580|AT1G74660|AT4G34160|AT4G18710|AT1G74500|AT2G01950|AT2G44080|AT3G48430|AT2G41230|AT3G46290|AT5G54380|AT4G38740
65001	1.9683e-11	1.7381e-10	14	24	1950	30472	specification of axis polarity	AT1G12980|AT5G22650|AT5G16560|AT2G34710|AT1G30490|AT3G05040|AT5G50320|AT1G68310|AT5G60690|AT2G37630|AT5G55250|AT3G44750|AT2G32700|AT4G32551
10038	2.0897e-11	1.8418e-10	71	474	1950	30472	response to metal ion	AT3G02570|AT3G09600|AT3G09840|AT1G09780|AT4G29860|AT5G03280|AT4G11850|AT4G32551|AT5G58270|AT1G43850|AT1G78870|AT5G37770|AT4G14880|AT3G12810|AT3G10920|AT3G04120|AT5G42020|AT1G66340|AT5G47390|AT2G37630|AT1G74560|AT5G53470|AT2G21660|AT3G56090|AT4G29040|AT2G32700|AT3G48990|AT2G47470|AT2G43750|AT4G11280|AT3G15730|AT1G21750|AT4G38740|AT5G01600|AT5G17310|AT4G24190|AT3G25230|AT1G70730|AT5G15650|AT1G16890…
35266	2.1816e-11	1.9191e-10	11	14	1950	30472	meristem growth	AT5G45550|AT5G18560|AT4G29040|AT5G05980|AT5G53400|AT4G08500|AT4G07410|AT3G03773|AT1G51190|AT4G02450|AT3G20840
9506	2.2565e-11	1.9774e-10	115	945	1950	30472	plasmodesma	AT3G51460|AT2G37620|AT4G29900|AT5G18700|AT3G53480|AT4G02020|AT2G01820|AT5G58710|AT2G21710|AT1G76850|AT1G02780|AT4G23250|AT5G42020|AT5G25460|AT3G60740|AT5G37600|AT4G37890|AT2G21660|AT3G44110|AT4G13940|AT1G74720|AT4G16370|AT3G63290|AT1G73590|AT3G25290|AT2G30490|AT3G01780|AT3G08970|AT4G24190|AT2G36910|AT1G67120|AT1G72150|AT3G15380|AT3G16470|AT3G43210|AT5G03540|AT4G16760|AT2G47000|AT5G56030|AT1G11130…
55044	2.2565e-11	1.9774e-10	115	945	1950	30472	symplast	AT3G51460|AT2G37620|AT4G29900|AT5G18700|AT3G53480|AT4G02020|AT2G01820|AT5G58710|AT2G21710|AT1G76850|AT1G02780|AT4G23250|AT5G42020|AT5G25460|AT3G60740|AT5G37600|AT4G37890|AT2G21660|AT3G44110|AT4G13940|AT1G74720|AT4G16370|AT3G63290|AT1G73590|AT3G25290|AT2G30490|AT3G01780|AT3G08970|AT4G24190|AT2G36910|AT1G67120|AT1G72150|AT3G15380|AT3G16470|AT3G43210|AT5G03540|AT4G16760|AT2G47000|AT5G56030|AT1G11130…
43565	2.5018e-11	2.1883e-10	64	407	1950	30472	sequence-specific DNA binding	AT1G17920|AT5G17490|AT4G40060|AT4G01250|AT5G48150|AT5G66700|AT5G02030|AT5G11260|AT2G45160|AT5G39550|AT5G41920|AT1G72050|AT1G54060|AT4G16780|AT4G24540|AT1G20900|AT3G54220|AT1G33240|AT3G19580|AT4G00150|AT4G37650|AT1G76500|AT3G61150|AT4G23810|AT4G17460|AT4G17980|AT4G32880|AT3G29035|AT3G01460|AT1G55580|AT1G14350|AT2G36270|AT5G62000|AT3G60630|AT1G66350|AT5G65590|AT5G47040|AT2G22300|AT1G69780|AT4G08150…
30054	2.5772e-11	2.2457e-10	115	947	1950	30472	cell junction	AT3G51460|AT2G37620|AT4G29900|AT5G18700|AT3G53480|AT4G02020|AT2G01820|AT5G58710|AT2G21710|AT1G76850|AT1G02780|AT4G23250|AT5G42020|AT5G25460|AT3G60740|AT5G37600|AT4G37890|AT2G21660|AT3G44110|AT4G13940|AT1G74720|AT4G16370|AT3G63290|AT1G73590|AT3G25290|AT2G30490|AT3G01780|AT3G08970|AT4G24190|AT2G36910|AT1G67120|AT1G72150|AT3G15380|AT3G16470|AT3G43210|AT5G03540|AT4G16760|AT2G47000|AT5G56030|AT1G11130…
5911	2.5772e-11	2.2457e-10	115	947	1950	30472	cell-cell junction	AT3G51460|AT2G37620|AT4G29900|AT5G18700|AT3G53480|AT4G02020|AT2G01820|AT5G58710|AT2G21710|AT1G76850|AT1G02780|AT4G23250|AT5G42020|AT5G25460|AT3G60740|AT5G37600|AT4G37890|AT2G21660|AT3G44110|AT4G13940|AT1G74720|AT4G16370|AT3G63290|AT1G73590|AT3G25290|AT2G30490|AT3G01780|AT3G08970|AT4G24190|AT2G36910|AT1G67120|AT1G72150|AT3G15380|AT3G16470|AT3G43210|AT5G03540|AT4G16760|AT2G47000|AT5G56030|AT1G11130…
280	2.9427e-11	2.5594e-10	29	109	1950	30472	nuclear division	AT3G57860|AT1G11060|AT4G31400|AT3G54650|AT4G22970|AT2G20000|AT4G22910|AT2G18290|AT5G05560|AT5G37630|AT1G78770|AT5G48600|AT1G61030|AT5G15540|AT4G11920|AT4G21530|AT3G59550|AT5G42080|AT2G34680|AT4G26760|AT3G54180|AT2G42260|AT1G75950|AT4G34160|AT5G55230|AT1G47200|AT3G48750|AT2G04660|AT3G07160
48284	3.5349e-11	3.0687e-10	25	83	1950	30472	organelle fusion	AT2G35940|AT1G31470|AT3G27530|AT4G30930|AT5G48030|AT1G19520|AT2G34790|AT1G24450|AT1G31817|AT2G20585|AT5G28540|AT4G14040|AT4G13890|AT5G23420|AT5G42020|AT3G28730|AT3G03810|AT4G05440|AT2G34260|AT2G31170|AT4G33050|AT4G37890|AT2G01730|AT1G72440|AT2G20490
9958	3.8626e-11	3.3468e-10	15	29	1950	30472	positive gravitropism	AT2G34650|AT5G67440|AT5G47990|AT3G28860|AT2G36910|AT1G70940|AT2G38120|AT1G16510|AT4G24670|AT5G06140|AT4G37590|AT1G77740|AT1G70560|AT5G45710|AT4G16340
16887	4.0706e-11	3.5205e-10	73	501	1950	30472	ATPase activity	AT1G44900|AT1G10130|AT3G09840|AT1G09100|AT1G64110|AT4G29900|AT2G30950|AT5G18620|AT3G53480|AT4G02460|AT1G17840|AT4G09140|AT3G63480|AT5G61730|AT1G16280|AT5G65930|AT3G10670|AT1G08840|AT5G58270|AT1G79560|AT1G70070|AT2G20140|AT3G05530|AT2G06990|AT1G80350|AT3G01610|AT2G26910|AT1G50250|AT4G29040|AT1G01040|AT5G13010|AT2G02480|AT2G46020|AT4G14790|AT5G23630|AT1G12770|AT5G42270|AT5G26742|AT2G28290|AT5G40010…
9943	4.2088e-11	3.6332e-10	14	25	1950	30472	adaxial/abaxial axis specification	AT5G22650|AT5G16560|AT2G34710|AT1G30490|AT3G05040|AT3G52770|AT1G68310|AT5G60690|AT2G37630|AT5G55250|AT3G44750|AT2G32700|AT4G32551|AT2G45450
30029	4.5032e-11	3.8802e-10	27	97	1950	30472	actin filament-based process	AT4G01710|AT3G23670|AT5G18700|AT2G22640|AT1G30825|AT5G54650|AT5G05620|AT5G43900|AT3G33520|AT5G20490|AT5G18410|AT1G04160|AT3G27000|AT2G38440|AT5G56600|AT4G29350|AT5G35700|AT2G35110|AT2G19760|AT3G12380|AT2G46225|AT1G17580|AT3G61650|AT1G13180|AT4G14150|AT3G13870|AT4G30160
16125	5.2661e-11	4.529e-10	24	78	1950	30472	sterol metabolic process	AT1G11680|AT2G32440|AT5G45340|AT1G05160|AT3G50660|AT3G07020|AT5G48230|AT3G30180|AT1G19630|AT5G48000|AT1G12740|AT4G14850|AT5G13710|AT5G05690|AT4G36380|AT1G07420|AT3G13730|AT4G15393|AT1G20330|AT3G52940|AT1G04010|AT4G15396|AT4G19230|AT1G43620
16129	5.4367e-11	4.6585e-10	16	34	1950	30472	phytosteroid biosynthetic process	AT4G31910|AT2G32440|AT5G45340|AT1G05160|AT3G50660|AT3G30180|AT1G19630|AT5G48000|AT1G12740|AT5G05690|AT2G45400|AT4G36380|AT3G13730|AT4G15393|AT4G15396|AT4G19230
16132	5.4367e-11	4.6585e-10	16	34	1950	30472	brassinosteroid biosynthetic process	AT4G31910|AT2G32440|AT5G45340|AT1G05160|AT3G50660|AT3G30180|AT1G19630|AT5G48000|AT1G12740|AT5G05690|AT2G45400|AT4G36380|AT3G13730|AT4G15393|AT4G15396|AT4G19230
10065	6.6023e-11	5.6259e-10	10	12	1950	30472	primary meristem tissue development	AT5G62940|AT1G08590|AT1G46480|AT2G20300|AT1G05470|AT3G24770|AT5G61480|AT4G28650|AT4G13195|AT4G32880
48574	6.6023e-11	5.6259e-10	10	12	1950	30472	long-day photoperiodism, flowering	AT2G46830|AT1G28520|AT1G18450|AT1G01060|AT2G42400|AT4G24415|AT2G13540|AT5G37770|AT3G57230|AT1G04400
48598	6.6023e-11	5.6259e-10	10	12	1950	30472	embryonic morphogenesis	AT1G08260|AT4G00020|AT2G01830|AT1G69780|AT3G46740|AT1G74500|AT3G04460|AT3G23980|AT1G73590|AT5G57020
10268	7.2665e-11	6.1805e-10	15	30	1950	30472	brassinosteroid homeostasis	AT2G32440|AT5G45340|AT1G05160|AT3G50660|AT3G30180|AT1G19630|AT5G48000|AT1G12740|AT4G39400|AT5G05690|AT4G36380|AT3G13730|AT4G15393|AT4G15396|AT4G19230
578	7.7044e-11	6.541e-10	11	15	1950	30472	embryonic axis specification	AT1G69270|AT1G13980|AT3G02130|AT1G73030|AT5G63420|AT1G28560|AT1G23080|AT1G19850|AT5G56270|AT1G17730|AT2G26890
51641	9.119e-11	7.7277e-10	94	732	1950	30472	cellular localization	AT5G22640|AT3G55620|AT1G13120|AT5G24740|AT5G42890|AT4G31500|AT3G05040|AT5G17410|AT4G03550|AT3G58170|AT2G19560|AT5G07120|AT5G56450|AT5G03280|AT3G46740|AT1G76850|AT4G38490|AT5G05620|AT3G10110|AT3G05290|AT4G36630|AT5G43900|AT2G37678|AT4G24540|AT3G03110|AT2G31530|AT5G20490|AT3G54220|AT5G27520|AT3G56640|AT1G04160|AT1G66340|AT3G61630|AT3G25520|AT5G19820|AT1G17730|AT1G79810|AT2G21660|AT1G73030|AT1G17580…
7610	9.4186e-11	7.9671e-10	16	35	1950	30472	behavior	AT1G60420|AT1G15330|AT1G67960|AT4G08850|AT5G14850|AT3G22200|AT4G28650|AT2G15890|AT2G43790|AT5G60410|AT5G07370|AT3G45640|AT5G61760|AT2G41630|AT1G02140|AT4G15570
7623	1.2443e-10	1.0506e-09	27	101	1950	30472	circadian rhythm	AT1G10470|AT3G09600|AT4G08920|AT1G68050|AT2G18790|AT2G46830|AT1G22770|AT5G05660|AT2G25930|AT2G21070|AT4G36930|AT3G54810|AT3G48360|AT1G04400|AT5G57360|AT2G18915|AT4G04970|AT5G24470|AT5G61380|AT4G00150|AT1G69690|AT2G44680|AT5G64813|AT2G21660|AT1G01060|AT4G30200|AT5G37260
9637	1.2736e-10	1.0734e-09	24	81	1950	30472	response to blue light	AT4G08920|AT4G18390|AT3G28860|AT1G09570|AT2G36910|AT4G40060|AT1G48270|AT4G28880|AT2G36890|AT2G36990|AT4G28860|AT1G68050|AT2G18790|AT3G15540|AT1G22770|AT2G26300|AT1G05630|AT5G20730|AT2G46340|AT1G02330|AT1G21970|AT1G04400|AT2G26890|AT4G38740
33612	1.3243e-10	1.1141e-09	15	31	1950	30472	receptor serine/threonine kinase binding	AT3G49670|AT1G34210|AT3G28455|AT3G24770|AT1G71830|AT2G13790|AT1G65380|AT1G75820|AT5G65700|AT1G49005|AT3G07360|AT2G34925|AT1G20780|AT4G13195|AT5G13290
6979	1.422e-10	1.1941e-09	62	404	1950	30472	response to oxidative stress	AT2G39800|AT4G02380|AT1G66330|AT3G56350|AT2G37860|AT4G35460|AT5G03280|AT4G11850|AT5G05340|AT5G13680|AT4G32551|AT1G43850|AT5G37770|AT1G09970|AT2G22240|AT1G34190|AT3G63080|AT3G48360|AT3G10920|AT3G04120|AT1G35580|AT3G08640|AT1G32230|AT2G43790|AT2G47510|AT3G56090|AT3G45640|AT4G23810|AT3G47860|AT2G32700|AT4G32320|AT1G05680|AT5G06720|AT4G11280|AT4G12570|AT2G03050|AT3G29035|AT5G01600|AT1G09000|AT2G16500…
7017	1.6262e-10	1.3631e-09	35	162	1950	30472	microtubule-based process	AT1G80260|AT1G11060|AT3G23670|AT3G54870|AT5G49720|AT5G17410|AT5G18700|AT4G01370|AT5G57880|AT3G63480|AT3G16630|AT1G20090|AT2G18390|AT5G65930|AT3G43210|AT3G44200|AT1G52240|AT2G44190|AT1G75640|AT5G05620|AT5G44610|AT5G28646|AT1G01510|AT1G01950|AT1G80350|AT5G19400|AT1G61030|AT3G60740|AT4G26760|AT1G75950|AT5G08120|AT5G55230|AT1G18370|AT3G61650|AT4G14150
10067	1.6674e-10	1.3951e-09	9	10	1950	30472	procambium histogenesis	AT5G62940|AT1G08590|AT1G46480|AT1G05470|AT3G24770|AT5G61480|AT4G28650|AT4G13195|AT4G32880
4842	1.7756e-10	1.483e-09	56	348	1950	30472	ubiquitin-protein ligase activity	AT1G66610|AT1G66650|AT3G54650|AT4G28370|AT4G27880|AT5G37930|AT5G57740|AT1G78870|AT2G44950|AT5G39550|AT1G26830|AT2G39810|AT1G66620|AT5G21140|AT1G66660|AT3G26810|AT3G61590|AT1G79810|AT4G37890|AT3G61790|AT4G03190|AT3G63530|AT2G42620|AT3G07360|AT2G02760|AT2G04660|AT1G20780|AT4G33210|AT2G26350|AT4G12570|AT4G02440|AT2G32950|AT1G16890|AT5G42190|AT1G68050|AT1G45050|AT3G60350|AT2G18290|AT5G05560|AT1G27340…
9894	2.1718e-10	1.8106e-09	21	64	1950	30472	regulation of catabolic process	AT4G24960|AT3G57860|AT2G32950|AT3G54320|AT1G32310|AT3G60740|AT4G24580|AT2G42260|AT3G44110|AT1G50030|AT1G27320|AT2G18290|AT1G71230|AT5G35750|AT1G20200|AT1G20780|AT2G01570|AT1G54490|AT2G46240|AT2G26130|AT5G05700
10647	2.2873e-10	1.9034e-09	18	47	1950	30472	positive regulation of cell communication	AT4G24210|AT3G05120|AT3G52430|AT5G27320|AT1G67890|AT4G03110|AT1G48270|AT2G32460|AT1G18080|AT3G63010|AT5G03280|AT5G06100|AT3G15150|AT1G48630|AT3G18130|AT1G07430|AT2G26300|AT3G15730
45087	2.4471e-10	2.0328e-09	52	313	1950	30472	innate immune response	AT5G47220|AT4G31500|AT5G23570|AT3G52430|AT3G49500|AT4G03110|AT2G39200|AT4G01370|AT5G03280|AT4G11850|AT3G44880|AT5G05780|AT2G46370|AT5G37770|AT2G44950|AT3G54420|AT1G20900|AT1G55250|AT1G32230|AT1G66340|AT2G43790|AT4G34460|AT2G21660|AT4G08480|AT3G45640|AT4G29040|AT1G01040|AT1G51660|AT1G48410|AT4G23810|AT5G13010|AT4G38740|AT5G20320|AT1G55020|AT1G08030|AT4G08500|AT4G23100|AT4G20910|AT3G63420|AT5G56030…
6508	2.6121e-10	2.166e-09	104	858	1950	30472	proteolysis	AT5G46210|AT1G10570|AT1G09100|AT1G66650|AT5G22000|AT2G30950|AT4G28370|AT4G21100|AT5G02190|AT5G57740|AT1G79560|AT1G78870|AT1G64520|AT1G66660|AT1G71696|AT3G61790|AT4G03190|AT2G02760|AT2G04660|AT4G33210|AT4G12570|AT2G04160|AT5G42270|AT4G23940|AT1G16890|AT4G22970|AT5G64580|AT5G42390|AT5G47040|AT1G68050|AT2G18290|AT5G05560|AT4G14220|AT4G38630|AT5G57360|AT4G30920|AT3G54720|AT4G32940|AT1G60220|AT1G17110…
48571	2.6955e-10	2.2311e-09	10	13	1950	30472	long-day photoperiodism	AT2G46830|AT1G28520|AT1G18450|AT1G01060|AT2G42400|AT4G24415|AT2G13540|AT5G37770|AT3G57230|AT1G04400
70271	2.7865e-10	2.2983e-09	46	259	1950	30472	protein complex biogenesis	AT3G02130|AT3G08950|AT1G02090|AT1G15220|AT1G61040|AT4G01710|AT4G00026|AT4G26430|AT5G47040|AT2G36990|AT2G22640|AT3G61140|AT1G75820|AT1G53310|AT2G18390|AT4G13510|AT5G54650|AT1G76850|AT1G71440|AT1G02680|AT5G56030|AT4G38630|AT4G35540|AT1G64520|AT5G17020|AT3G03110|AT5G23660|AT5G56600|AT3G60740|AT5G19820|AT4G02570|AT3G57290|AT2G47510|AT1G21170|AT5G55230|AT1G47260|AT5G35220|AT4G29040|AT1G71230|AT2G41630…
6461	2.7865e-10	2.2983e-09	46	259	1950	30472	protein complex assembly	AT3G02130|AT3G08950|AT1G02090|AT1G15220|AT1G61040|AT4G01710|AT4G00026|AT4G26430|AT5G47040|AT2G36990|AT2G22640|AT3G61140|AT1G75820|AT1G53310|AT2G18390|AT4G13510|AT5G54650|AT1G76850|AT1G71440|AT1G02680|AT5G56030|AT4G38630|AT4G35540|AT1G64520|AT5G17020|AT3G03110|AT5G23660|AT5G56600|AT3G60740|AT5G19820|AT4G02570|AT3G57290|AT2G47510|AT1G21170|AT5G55230|AT1G47260|AT5G35220|AT4G29040|AT1G71230|AT2G41630…
16772	2.8011e-10	2.3062e-09	172	1668	1950	30472	transferase activity, transferring phosphorus-containing groups	AT2G39800|AT3G07980|AT4G08920|AT2G15430|AT5G18700|AT4G04040|AT1G73500|AT4G28650|AT3G05840|AT3G01640|AT4G02260|AT2G18790|AT3G14270|AT2G01820|AT1G27320|AT5G64960|AT5G37850|AT1G50460|AT1G75640|AT5G45800|AT1G09970|AT3G01090|AT1G63700|AT5G42810|AT5G67260|AT4G23250|AT3G49670|AT1G15110|AT4G35910|AT1G09570|AT3G54180|AT2G44680|AT2G01830|AT4G18710|AT5G07370|AT4G08480|AT2G01950|AT2G26830|AT1G51660|AT4G30340…
6275	3.1548e-10	2.5928e-09	14	28	1950	30472	regulation of DNA replication	AT1G55350|AT1G33240|AT5G24330|AT4G11920|AT5G67100|AT2G34780|AT3G12280|AT1G69380|AT2G23430|AT5G09790|AT3G15150|AT2G18290|AT1G20330|AT1G78770
90068	3.5486e-10	2.9113e-09	12	20	1950	30472	positive regulation of cell cycle process	AT1G55350|AT2G18290|AT5G14250|AT5G61960|AT5G42970|AT1G71230|AT1G04020|AT4G11920|AT1G22920|AT4G22970|AT5G07290|AT4G29860
43623	3.9494e-10	3.2343e-09	34	159	1950	30472	cellular protein complex assembly	AT3G08950|AT1G02090|AT1G15220|AT4G01710|AT4G00026|AT4G26430|AT5G47040|AT2G22640|AT3G61140|AT1G75820|AT2G18390|AT4G13510|AT5G54650|AT1G76850|AT1G71440|AT5G56030|AT4G38630|AT1G64520|AT5G17020|AT3G03110|AT5G56600|AT3G60740|AT5G19820|AT4G02570|AT1G21170|AT5G55230|AT5G35220|AT4G29040|AT1G71230|AT1G22920|AT2G02560|AT3G10220|AT5G56280|AT4G14110
80134	4.0767e-10	3.3327e-09	40	209	1950	30472	regulation of response to stress	AT5G65050|AT1G10370|AT4G00020|AT4G25520|AT5G47220|AT5G23570|AT3G07780|AT3G52430|AT3G02150|AT4G29140|AT1G17980|AT4G03550|AT1G49040|AT4G29860|AT2G18790|AT1G25540|AT5G03280|AT4G15415|AT1G77300|AT2G46370|AT2G25110|AT4G24540|AT1G20900|AT5G62090|AT3G27960|AT5G24590|AT2G37630|AT4G02590|AT2G43790|AT5G60410|AT1G19180|AT4G08480|AT3G45640|AT3G47620|AT4G15900|AT4G23810|AT2G32700|AT1G22920|AT2G33835|AT2G22370
19899	4.4864e-10	3.6611e-09	42	227	1950	30472	enzyme binding	AT5G46210|AT2G28250|AT1G64990|AT1G16890|AT4G08500|AT3G21510|AT1G45050|AT4G35560|AT5G08790|AT1G72150|AT4G17615|AT1G27320|AT2G38280|AT5G35750|AT1G80100|AT5G37055|AT1G78870|AT2G46370|AT2G26300|AT3G54710|AT1G26830|AT5G43900|AT4G35540|AT5G64070|AT4G27630|AT5G17020|AT3G03110|AT4G02570|AT5G42080|AT4G24580|AT2G31270|AT1G14400|AT2G45430|AT1G72560|AT1G78900|AT2G01830|AT1G69670|AT3G63530|AT2G02760|AT2G04660…
7276	5.1133e-10	4.1653e-09	18	49	1950	30472	gamete generation	AT1G64110|AT2G41500|AT2G06510|AT3G54650|AT5G57800|AT3G04620|AT4G35560|AT2G20000|AT5G06100|AT4G29040|AT1G18450|AT2G46040|AT3G07160|AT3G11440|AT1G06520|AT5G59030|AT2G20140|AT4G37750
70882	5.4787e-10	4.4552e-09	40	211	1950	30472	cellular cell wall organization or biogenesis	AT3G01040|AT3G02230|AT4G21060|AT5G15470|AT3G08550|AT4G02500|AT5G15650|AT2G22900|AT1G19300|AT3G57280|AT3G29810|AT5G66460|AT3G01640|AT1G68060|AT4G36890|AT1G02720|AT4G32551|AT1G79580|AT2G25110|AT1G27600|AT4G11150|AT2G35610|AT3G55830|AT1G33280|AT1G64440|AT5G22130|AT1G80350|AT3G62720|AT4G28320|AT5G42080|AT1G14720|AT5G16910|AT5G11630|AT1G02730|AT2G01850|AT3G19770|AT2G32700|AT2G41850|AT3G13870|AT1G74380
9850	5.6898e-10	4.6187e-09	21	67	1950	30472	auxin metabolic process	AT2G33860|AT4G31500|AT5G27520|AT3G54430|AT4G05530|AT5G66350|AT4G24670|AT2G18120|AT1G75520|AT1G25220|AT4G14430|AT4G36260|AT1G19790|AT5G12330|AT1G48410|AT2G20610|AT1G70560|AT5G05730|AT1G05680|AT3G10870|AT3G05290
9738	5.9225e-10	4.7992e-09	37	186	1950	30472	abscisic acid mediated signaling pathway	AT5G46210|AT5G47100|AT1G34120|AT3G08550|AT2G36270|AT1G48270|AT1G69270|AT4G17615|AT5G13680|AT5G01560|AT3G11220|AT3G01090|AT2G26300|AT3G48360|AT3G63060|AT1G12240|AT3G55830|AT1G05470|AT2G17820|AT3G51550|AT3G56860|AT3G19580|AT5G63980|AT2G39175|AT4G21670|AT5G10720|AT4G35890|AT4G34460|AT3G45640|AT5G46845|AT4G18010|AT3G07360|AT3G46550|AT4G33950|AT3G15730|AT2G28350|AT1G21970
34440	6.1553e-10	4.9791e-09	17	44	1950	30472	lipid oxidation	AT5G42890|AT1G55020|AT3G04460|AT5G27520|AT4G29010|AT2G35690|AT1G17420|AT3G06810|AT3G22400|AT4G14430|AT1G79810|AT1G72970|AT1G72520|AT3G51840|AT3G05290|AT4G16760|AT2G26350
16044	6.4733e-10	5.2272e-09	38	195	1950	30472	cellular membrane organization	AT1G13980|AT1G60490|AT3G01780|AT3G07980|AT1G55020|AT3G27530|AT1G03160|AT2G30950|AT1G59820|AT5G48030|AT1G32500|AT5G07120|AT3G14270|AT5G13300|AT5G12130|AT3G46560|AT3G10670|AT5G45900|AT3G47450|AT2G26300|AT4G33240|AT4G31780|AT5G18570|AT1G35680|AT3G56960|AT1G56200|AT2G31170|AT4G28880|AT4G28860|AT5G06140|AT5G58440|AT5G35220|AT1G44890|AT1G06430|AT3G13530|AT5G41950|AT2G07050|AT2G26890
71554	7.3244e-10	5.8988e-09	85	662	1950	30472	cell wall organization or biogenesis	AT3G01040|AT2G36850|AT4G21060|AT5G15470|AT3G57200|AT4G31500|AT3G08550|AT5G51640|AT4G02500|AT5G49720|AT5G66300|AT4G28370|AT1G19300|AT3G57280|AT4G03550|AT3G29810|AT1G63180|AT5G66460|AT3G01640|AT5G49360|AT3G09090|AT5G03280|AT1G75120|AT4G32551|AT1G05850|AT2G25110|AT1G27600|AT5G55480|AT3G54420|AT2G35610|AT3G55830|AT1G33280|AT1G12560|AT1G64440|AT1G12040|AT1G80350|AT3G56960|AT1G66340|AT3G62720|AT5G16910…
51246	7.3305e-10	5.8988e-09	40	213	1950	30472	regulation of protein metabolic process	AT1G13120|AT3G57860|AT5G21150|AT2G32950|AT3G24440|AT5G25890|AT1G18080|AT3G44600|AT4G22910|AT2G18290|AT1G77300|AT1G04020|AT5G37055|AT5G45600|AT3G47450|AT4G39100|AT5G53180|AT4G22140|AT3G01150|AT1G79280|AT2G06210|AT1G09570|AT1G32310|AT4G11920|AT4G05440|AT3G57290|AT2G39990|AT1G13950|AT2G42260|AT1G48630|AT1G48410|AT5G10480|AT1G71230|AT1G20200|AT5G43810|AT3G48430|AT2G01570|AT5G55390|AT2G26130|AT4G38740
9642	7.3609e-10	5.913e-09	30	131	1950	30472	response to light intensity	AT2G35720|AT5G42270|AT4G08920|AT2G32950|AT2G30950|AT4G02380|AT1G17420|AT1G48270|AT2G18790|AT3G61140|AT2G45400|AT1G01470|AT5G04410|AT5G37770|AT5G58070|AT2G26300|AT2G22240|AT2G46990|AT1G04400|AT1G64520|AT4G17490|AT1G09570|AT2G45430|AT1G50250|AT3G18780|AT3G47860|AT1G06430|AT4G01800|AT2G46240|AT1G02330
31537	7.7952e-10	6.251e-09	12	21	1950	30472	regulation of anthocyanin metabolic process	AT1G69690|AT1G64520|AT2G25180|AT4G31920|AT5G13680|AT5G46845|AT5G11260|AT2G39175|AT3G16857|AT3G11220|AT1G09530|AT2G28350
6694	7.8695e-10	6.2997e-09	23	81	1950	30472	steroid biosynthetic process	AT4G31910|AT1G11680|AT2G32440|AT5G45340|AT1G05160|AT3G50660|AT3G07020|AT3G30180|AT1G19630|AT5G48000|AT1G12740|AT5G13710|AT5G05690|AT2G45400|AT4G36380|AT1G07420|AT3G13730|AT4G15393|AT1G20330|AT3G52940|AT4G15396|AT4G19230|AT1G43620
8202	8.0444e-10	6.4286e-09	27	109	1950	30472	steroid metabolic process	AT1G11680|AT5G45340|AT1G05160|AT3G07020|AT5G48230|AT3G30180|AT2G45400|AT4G15393|AT1G20330|AT4G15396|AT4G19230|AT4G31910|AT4G24220|AT2G32440|AT3G50660|AT1G19630|AT5G48000|AT1G12740|AT4G14850|AT5G13710|AT5G05690|AT4G36380|AT1G07420|AT3G13730|AT3G52940|AT1G04010|AT1G43620
42592	8.2034e-10	6.5443e-09	75	556	1950	30472	homeostatic process	AT1G05180|AT1G10130|AT4G08920|AT2G32410|AT4G29140|AT3G06810|AT3G57280|AT3G51060|AT3G20840|AT4G35460|AT2G18790|AT3G62270|AT1G50460|AT2G01420|AT5G58270|AT5G58070|AT2G02470|AT5G42810|AT1G51190|AT1G04400|AT1G56260|AT3G50660|AT2G35690|AT1G19630|AT5G48000|AT4G37650|AT5G55250|AT2G42580|AT1G69690|AT2G01830|AT3G56090|AT5G53550|AT2G27600|AT1G79530|AT4G16370|AT2G47470|AT1G73590|AT1G21750|AT4G33210|AT5G23630…
6261	9.2347e-10	7.3544e-09	22	75	1950	30472	DNA-dependent DNA replication	AT1G44900|AT5G24630|AT3G25100|AT1G66730|AT5G27740|AT1G15570|AT4G32700|AT3G09660|AT3G20780|AT5G67100|AT1G48380|AT3G54180|AT2G42260|AT1G69690|AT1G21690|AT4G22910|AT5G04470|AT3G48750|AT1G08840|AT2G02480|AT4G38600|AT1G19080
16773	1.0232e-09	8.1347e-09	134	1231	1950	30472	phosphotransferase activity, alcohol group as acceptor	AT3G07980|AT4G08920|AT4G04040|AT1G73500|AT4G28650|AT3G05840|AT3G01640|AT2G18790|AT3G14270|AT2G01820|AT1G27320|AT5G64960|AT5G37850|AT1G50460|AT1G75640|AT5G45800|AT1G09970|AT3G01090|AT1G63700|AT5G42810|AT5G67260|AT4G23250|AT3G49670|AT1G09570|AT3G54180|AT2G44680|AT2G01830|AT4G18710|AT5G07370|AT4G08480|AT2G01950|AT2G26830|AT1G51660|AT4G30340|AT3G53810|AT2G41210|AT3G45040|AT2G46340|AT4G20270|AT2G28250…
16128	1.0729e-09	8.5006e-09	16	40	1950	30472	phytosteroid metabolic process	AT4G31910|AT2G32440|AT5G45340|AT1G05160|AT3G50660|AT3G30180|AT1G19630|AT5G48000|AT1G12740|AT5G05690|AT2G45400|AT4G36380|AT3G13730|AT4G15393|AT4G15396|AT4G19230
16131	1.0729e-09	8.5006e-09	16	40	1950	30472	brassinosteroid metabolic process	AT4G31910|AT2G32440|AT5G45340|AT1G05160|AT3G50660|AT3G30180|AT1G19630|AT5G48000|AT1G12740|AT5G05690|AT2G45400|AT4G36380|AT3G13730|AT4G15393|AT4G15396|AT4G19230
9867	1.1543e-09	9.1301e-09	19	57	1950	30472	jasmonic acid mediated signaling pathway	AT3G03450|AT5G17490|AT1G15750|AT5G47220|AT3G50660|AT1G32230|AT1G66350|AT4G02570|AT1G14920|AT4G01370|AT2G18790|AT2G43790|AT1G25540|AT4G34460|AT1G19180|AT5G64930|AT2G46370|AT2G01570|AT3G15500
302	1.1827e-09	9.3383e-09	36	182	1950	30472	response to reactive oxygen species	AT3G29035|AT5G01600|AT4G02380|AT3G56350|AT1G11760|AT2G37860|AT4G35460|AT1G22770|AT5G39610|AT5G05340|AT5G51020|AT5G37770|AT2G22240|AT1G34190|AT3G48360|AT3G10920|AT3G04120|AT1G35580|AT4G17490|AT3G08640|AT1G07890|AT1G32230|AT1G56560|AT5G63160|AT5G10720|AT2G43790|AT3G56090|AT4G23810|AT4G32320|AT1G05680|AT5G06720|AT2G40300|AT2G46240|AT4G12570|AT2G03050|AT2G23140
33692	1.2855e-09	1.0133e-08	37	191	1950	30472	cellular polysaccharide biosynthetic process	AT3G01040|AT2G35620|AT1G10670|AT3G02230|AT2G36850|AT5G15470|AT3G08550|AT4G02500|AT5G49720|AT1G70730|AT5G15650|AT1G23190|AT2G22900|AT1G19300|AT4G03550|AT3G29810|AT1G63180|AT4G36890|AT1G02720|AT1G79500|AT1G05850|AT1G27600|AT2G35610|AT4G01220|AT4G04970|AT1G64440|AT5G22130|AT5G48300|AT1G16340|AT3G62720|AT5G16910|AT1G02730|AT3G20440|AT1G53000|AT2G32700|AT1G78240|AT3G07160
10103	1.3724e-09	1.08e-08	13	26	1950	30472	stomatal complex morphogenesis	AT1G14350|AT4G26690|AT5G65590|AT3G54180|AT3G12280|AT2G02820|AT3G63440|AT4G14723|AT3G61650|AT1G75640|AT5G05620|AT1G63700|AT5G55480
152	1.5004e-09	1.1766e-08	11	18	1950	30472	nuclear ubiquitin ligase complex	AT2G20000|AT4G05410|AT4G03190|AT2G32950|AT2G18290|AT5G05560|AT1G73177|AT1G04020|AT2G04660|AT3G01090|AT4G21530
45926	1.5004e-09	1.1766e-08	11	18	1950	30472	negative regulation of growth	AT1G19270|AT5G06100|AT1G02900|AT5G10480|AT5G03680|AT1G33240|AT3G51550|AT3G63530|AT1G32310|AT4G40060|AT3G11440
5768	1.5187e-09	1.189e-08	57	378	1950	30472	endosome	AT1G10130|AT3G08550|AT4G31820|AT4G02500|AT5G49720|AT3G59420|AT4G29140|AT5G07120|AT3G14270|AT5G54310|AT1G43130|AT1G51590|AT4G33240|AT5G52050|AT3G06300|AT2G35610|AT3G55830|AT3G21160|AT1G74800|AT2G38120|AT1G71696|AT3G62720|AT1G17730|AT3G08800|AT5G16910|AT4G37650|AT5G58440|AT1G73030|AT1G19360|AT2G27600|AT1G78240|AT2G43750|AT1G13980|AT2G28250|AT1G08030|AT1G59820|AT4G08500|AT3G54150|AT2G22900|AT1G30000…
48584	1.5391e-09	1.2029e-08	27	112	1950	30472	positive regulation of response to stimulus	AT4G24210|AT5G47220|AT3G05120|AT3G52430|AT4G03110|AT4G03550|AT1G48270|AT1G25540|AT5G03280|AT1G22770|AT2G46370|AT1G07430|AT2G26300|AT2G25110|AT4G24540|AT5G27320|AT1G67890|AT2G32460|AT2G43790|AT3G63010|AT1G28520|AT5G06100|AT3G15150|AT4G15900|AT2G42400|AT2G33835|AT3G15730
271	1.5885e-09	1.2394e-08	38	201	1950	30472	polysaccharide biosynthetic process	AT3G01040|AT2G35620|AT1G10670|AT3G02230|AT2G36850|AT5G15470|AT3G08550|AT4G02500|AT5G49720|AT1G70730|AT5G15650|AT1G23190|AT2G22900|AT1G19300|AT4G03550|AT3G29810|AT1G63180|AT4G36890|AT1G02720|AT1G79500|AT1G05850|AT1G27600|AT2G35610|AT3G55830|AT4G01220|AT4G04970|AT1G64440|AT5G22130|AT5G48300|AT1G16340|AT3G62720|AT5G16910|AT1G02730|AT3G20440|AT1G53000|AT2G32700|AT1G78240|AT3G07160
9944	1.6145e-09	1.2577e-08	12	22	1950	30472	polarity specification of adaxial/abaxial axis	AT5G55250|AT5G22650|AT5G16560|AT2G34710|AT1G30490|AT3G44750|AT3G05040|AT2G32700|AT1G68310|AT4G32551|AT5G60690|AT2G37630
16051	1.6861e-09	1.3112e-08	58	389	1950	30472	carbohydrate biosynthetic process	AT3G01040|AT3G02570|AT2G36850|AT5G15470|AT4G31500|AT3G05120|AT3G08550|AT4G02500|AT5G49720|AT1G19300|AT4G03550|AT3G29810|AT1G63180|AT1G05850|AT2G22240|AT5G42810|AT1G27600|AT3G04120|AT2G35610|AT3G55830|AT1G64440|AT5G27320|AT3G62720|AT5G16910|AT1G02730|AT3G63010|AT5G61760|AT3G20440|AT5G11110|AT2G20610|AT1G53000|AT2G32700|AT1G78240|AT3G07160|AT2G35620|AT1G10670|AT3G02230|AT1G70730|AT5G15650|AT4G02280…
48506	1.7372e-09	1.3464e-08	14	31	1950	30472	regulation of timing of meristematic phase transition	AT4G00650|AT1G10480|AT4G24540|AT5G15160|AT1G27370|AT4G40060|AT5G23150|AT5G44160|AT5G43270|AT5G12840|AT3G47710|AT5G03790|AT5G45600|AT2G22370
48510	1.7372e-09	1.3464e-08	14	31	1950	30472	regulation of timing of transition from vegetative to reproductive phase	AT4G00650|AT1G10480|AT4G24540|AT5G15160|AT1G27370|AT4G40060|AT5G23150|AT5G44160|AT5G43270|AT5G12840|AT3G47710|AT5G03790|AT5G45600|AT2G22370
34637	1.8624e-09	1.441e-08	52	331	1950	30472	cellular carbohydrate biosynthetic process	AT3G01040|AT3G02570|AT2G36850|AT5G15470|AT4G31500|AT3G08550|AT4G02500|AT5G49720|AT1G19300|AT4G03550|AT3G29810|AT1G63180|AT1G05850|AT2G22240|AT5G42810|AT1G27600|AT3G04120|AT2G35610|AT1G64440|AT3G62720|AT5G16910|AT1G02730|AT5G61760|AT3G20440|AT5G11110|AT2G20610|AT1G53000|AT2G32700|AT1G78240|AT3G07160|AT2G35620|AT1G10670|AT3G02230|AT1G70730|AT5G15650|AT4G02280|AT1G23190|AT2G22900|AT4G23100|AT4G36890…
61024	2.1226e-09	1.6396e-08	38	203	1950	30472	membrane organization	AT1G13980|AT1G60490|AT3G01780|AT3G07980|AT1G55020|AT3G27530|AT1G03160|AT2G30950|AT1G59820|AT5G48030|AT1G32500|AT5G07120|AT3G14270|AT5G13300|AT5G12130|AT3G46560|AT3G10670|AT5G45900|AT3G47450|AT2G26300|AT4G33240|AT4G31780|AT5G18570|AT1G35680|AT3G56960|AT1G56200|AT2G31170|AT4G28880|AT4G28860|AT5G06140|AT5G58440|AT5G35220|AT1G44890|AT1G06430|AT3G13530|AT5G41950|AT2G07050|AT2G26890
9942	2.3558e-09	1.8107e-08	8	9	1950	30472	longitudinal axis specification	AT1G69270|AT1G13980|AT3G02130|AT5G63420|AT1G28560|AT1G23080|AT1G19850|AT5G56270
10050	2.3558e-09	1.8107e-08	8	9	1950	30472	vegetative phase change	AT4G31877|AT5G20320|AT2G33860|AT5G60450|AT5G23570|AT3G01090|AT1G69440|AT2G15790
80060	2.3558e-09	1.8107e-08	8	9	1950	30472	integument development	AT1G52880|AT2G34710|AT1G30490|AT1G17560|AT1G52150|AT5G42630|AT1G51170|AT3G15510
4702	2.4856e-09	1.9041e-08	21	72	1950	30472	receptor signaling protein serine/threonine kinase activity	AT4G29810|AT1G11130|AT3G07980|AT1G09000|AT1G71830|AT2G13790|AT3G21220|AT4G08500|AT1G73500|AT4G01370|AT1G69270|AT2G43790|AT1G75820|AT4G08480|AT3G45640|AT2G01950|AT1G51660|AT1G07880|AT3G13530|AT1G63700|AT5G56580
5057	2.4856e-09	1.9041e-08	21	72	1950	30472	receptor signaling protein activity	AT4G29810|AT1G11130|AT3G07980|AT1G09000|AT1G71830|AT2G13790|AT3G21220|AT4G08500|AT1G73500|AT4G01370|AT1G69270|AT2G43790|AT1G75820|AT4G08480|AT3G45640|AT2G01950|AT1G51660|AT1G07880|AT3G13530|AT1G63700|AT5G56580
1708	2.4912e-09	1.9052e-08	13	27	1950	30472	cell fate specification	AT1G14740|AT5G24520|AT2G33860|AT5G16560|AT1G55350|AT3G63500|AT5G07280|AT3G12280|AT4G08150|AT4G13750|AT5G60450|AT5G41315|AT5G02820
32875	2.5126e-09	1.9184e-08	10	15	1950	30472	regulation of DNA endoreduplication	AT3G12280|AT1G69380|AT3G15150|AT1G55350|AT2G18290|AT1G33240|AT4G11920|AT1G20330|AT1G78770|AT2G34780
16458	2.8236e-09	2.1524e-08	38	205	1950	30472	gene silencing	AT5G20320|AT5G17690|AT5G21150|AT5G23570|AT3G05040|AT5G63110|AT3G49500|AT1G69440|AT1G60170|AT4G20910|AT3G17185|AT4G39100|AT1G70070|AT3G07610|AT4G22140|AT4G31877|AT1G32490|AT2G30280|AT4G16280|AT3G54560|AT5G23880|AT2G13540|AT2G39175|AT5G61780|AT5G23080|AT2G46685|AT1G69770|AT4G13940|AT1G01040|AT1G48410|AT5G13010|AT5G13570|AT2G27100|AT5G46845|AT5G43810|AT2G43410|AT2G27840|AT1G09700
9617	2.8414e-09	2.1624e-08	62	435	1950	30472	response to bacterium	AT5G47220|AT4G31500|AT3G52430|AT4G03550|AT1G25220|AT5G03280|AT4G11850|AT1G27320|AT3G44880|AT4G32551|AT5G37055|AT1G43850|AT2G46370|AT2G22240|AT5G42810|AT3G12810|AT1G80600|AT2G25110|AT3G54420|AT3G10920|AT4G23250|AT1G12240|AT5G17880|AT3G05010|AT1G32230|AT1G66340|AT2G37630|AT2G39730|AT3G26810|AT2G43790|AT5G11630|AT2G01830|AT3G45640|AT4G03190|AT4G23810|AT1G70560|AT2G32700|AT5G01600|AT5G24400|AT1G55020…
71395	3.0789e-09	2.3392e-08	19	60	1950	30472	cellular response to jasmonic acid stimulus	AT3G03450|AT5G17490|AT1G15750|AT5G47220|AT3G50660|AT1G32230|AT1G66350|AT4G02570|AT1G14920|AT4G01370|AT2G18790|AT2G43790|AT1G25540|AT4G34460|AT1G19180|AT5G64930|AT2G46370|AT2G01570|AT3G15500
9938	3.26e-09	2.4728e-08	9	12	1950	30472	negative regulation of gibberellic acid mediated signaling pathway	AT3G03450|AT5G17490|AT4G36260|AT3G11540|AT2G01570|AT1G66350|AT1G14920|AT3G51060|AT5G66350
90329	3.356e-09	2.5414e-08	11	19	1950	30472	regulation of DNA-dependent DNA replication	AT3G12280|AT1G69380|AT3G15150|AT1G55350|AT2G18290|AT1G33240|AT4G11920|AT1G20330|AT1G78770|AT5G67100|AT2G34780
44271	3.3615e-09	2.5414e-08	71	531	1950	30472	cellular nitrogen compound biosynthetic process	AT2G39800|AT5G41480|AT4G31500|AT1G03160|AT4G05450|AT5G14220|AT1G73500|AT1G48270|AT1G25220|AT5G10330|AT5G05980|AT2G38280|AT5G58270|AT4G14880|AT1G80600|AT3G02780|AT1G15110|AT3G23580|AT1G32230|AT2G40400|AT5G55810|AT3G21200|AT3G23940|AT2G43790|AT5G37600|AT3G45640|AT3G10160|AT1G48850|AT2G26830|AT2G20610|AT1G70560|AT1G54130|AT4G34740|AT2G43750|AT2G26670|AT1G10670|AT5G23670|AT2G16500|AT1G56430|AT3G06350…
10387	4.3506e-09	3.2839e-08	7	7	1950	30472	signalosome assembly	AT3G61140|AT1G02090|AT1G71230|AT1G22920|AT5G56280|AT4G14110|AT4G26430
7165	4.3585e-09	3.2845e-08	96	811	1950	30472	signal transduction	AT3G08510|AT5G42970|AT4G21100|AT3G22420|AT4G26430|AT4G01370|AT2G18790|AT1G25540|AT5G07120|AT3G14270|AT3G61140|AT1G46480|AT1G20090|AT4G15415|AT2G18390|AT1G25580|AT4G22910|AT1G02900|AT3G12690|AT5G11260|AT2G46370|AT3G01090|AT1G09530|AT4G16340|AT4G16780|AT5G64070|AT2G31650|AT5G17880|AT1G66740|AT5G14250|AT1G09570|AT1G10940|AT4G11920|AT5G63980|AT5G67100|AT4G24580|AT2G43790|AT4G34460|AT2G40080|AT5G58440…
9615	4.583e-09	3.4481e-08	22	81	1950	30472	response to virus	AT5G20320|AT5G21150|AT5G23570|AT5G45190|AT3G49500|AT5G24590|AT1G69440|AT2G37630|AT2G35980|AT2G43570|AT5G08120|AT4G20910|AT4G19600|AT1G01040|AT3G61890|AT1G48410|AT5G64960|AT5G43810|AT5G10270|AT2G22240|AT5G42810|AT1G04400
44431	4.8275e-09	3.6261e-08	73	557	1950	30472	Golgi apparatus part	AT3G01040|AT1G10130|AT4G21060|AT5G15470|AT1G64990|AT3G08550|AT4G02500|AT5G49720|AT3G58170|AT1G75120|AT5G62620|AT5G54310|AT1G43130|AT1G51590|AT2G03120|AT1G27600|AT3G06300|AT2G35610|AT3G55830|AT1G64440|AT3G21160|AT2G17720|AT1G74800|AT5G65000|AT3G62720|AT5G16910|AT4G34580|AT2G43790|AT1G02730|AT1G19360|AT1G78240|AT3G13870|AT5G13170|AT2G43750|AT1G01960|AT1G13980|AT5G47200|AT3G02230|AT5G22740|AT3G27530…
6418	5.6987e-09	4.2735e-08	19	62	1950	30472	tRNA aminoacylation for protein translation	AT3G55400|AT4G26300|AT3G02660|AT5G52520|AT2G31170|AT1G11870|AT1G14610|AT5G64050|AT5G49030|AT4G04350|AT5G16715|AT3G13490|AT5G56680|AT2G25840|AT2G04842|AT1G25350|AT3G48110|AT4G17300|AT5G22800
9570	5.8415e-09	4.3736e-08	83	669	1950	30472	chloroplast stroma	AT5G46290|AT1G78630|AT5G05980|AT5G61410|AT3G10670|AT1G74030|AT4G14880|AT1G80600|AT5G22800|AT1G70070|AT5G18570|AT3G02660|AT5G63980|AT5G23040|AT3G21200|AT3G23940|AT2G31170|AT2G39730|AT4G04350|AT5G16715|AT3G56090|AT3G20440|AT1G48850|AT1G51660|AT1G74960|AT1G79530|AT3G48110|AT3G48990|AT4G34740|AT4G01800|AT2G43750|AT4G17300|AT5G01600|AT3G55400|AT1G62750|AT5G26742|AT5G24400|AT4G32810|AT3G06350|AT1G70730…
6366	6.1073e-09	4.5652e-08	17	50	1950	30472	transcription from RNA polymerase II promoter	AT1G35460|AT4G04885|AT1G61040|AT3G22590|AT5G50320|AT5G61150|AT1G66470|AT4G02590|AT2G42280|AT5G05660|AT1G51140|AT1G79730|AT2G24260|AT4G30980|AT1G02680|AT5G58010|AT2G22370
45787	7.0241e-09	5.242e-08	11	20	1950	30472	positive regulation of cell cycle	AT4G19600|AT3G15150|AT2G18290|AT5G14250|AT5G42970|AT5G22220|AT1G71230|AT1G22920|AT1G06230|AT1G65470|AT5G58230
9311	7.0745e-09	5.2711e-08	24	97	1950	30472	oligosaccharide metabolic process	AT1G35580|AT5G22510|AT1G12240|AT1G08660|AT3G21160|AT3G05120|AT1G56560|AT3G03250|AT1G70730|AT5G27320|AT4G02280|AT5G17520|AT1G23190|AT4G09510|AT1G30000|AT3G22200|AT5G08370|AT1G67490|AT3G63010|AT5G11110|AT1G51590|AT4G33950|AT5G02410|AT2G43000
8134	7.4286e-09	5.5261e-08	23	90	1950	30472	transcription factor binding	AT1G16710|AT1G06040|AT4G00850|AT5G61780|AT5G24590|AT2G14210|AT3G57230|AT5G63160|AT3G12280|AT1G25540|AT1G19180|AT1G01160|AT5G28640|AT2G32700|AT3G12145|AT1G04020|AT1G43850|AT3G12980|AT1G51170|AT1G79000|AT1G02680|AT1G01510|AT3G48360
51327	7.5278e-09	5.5819e-08	22	83	1950	30472	M phase of meiotic cell cycle	AT5G48720|AT1G05180|AT1G80260|AT3G57860|AT1G11060|AT4G31400|AT5G19400|AT1G61030|AT2G06510|AT3G09660|AT5G15540|AT4G22970|AT4G02460|AT4G09140|AT5G57880|AT3G12280|AT1G75950|AT3G63480|AT1G01690|AT1G06660|AT1G77390|AT1G64625
7126	7.5278e-09	5.5819e-08	22	83	1950	30472	meiosis	AT5G48720|AT1G05180|AT1G80260|AT3G57860|AT1G11060|AT4G31400|AT5G19400|AT1G61030|AT2G06510|AT3G09660|AT5G15540|AT4G22970|AT4G02460|AT4G09140|AT5G57880|AT3G12280|AT1G75950|AT3G63480|AT1G01690|AT1G06660|AT1G77390|AT1G64625
10027	7.597e-09	5.6242e-08	14	34	1950	30472	thylakoid membrane organization	AT5G18570|AT1G35680|AT1G03160|AT2G30950|AT1G56200|AT1G32500|AT5G35220|AT5G12130|AT1G06430|AT3G10670|AT3G47450|AT2G26300|AT2G07050|AT4G31780
43038	7.6711e-09	5.661e-08	19	63	1950	30472	amino acid activation	AT3G55400|AT4G26300|AT3G02660|AT5G52520|AT2G31170|AT1G11870|AT1G14610|AT5G64050|AT5G49030|AT4G04350|AT5G16715|AT3G13490|AT5G56680|AT2G25840|AT2G04842|AT1G25350|AT3G48110|AT4G17300|AT5G22800
43039	7.6711e-09	5.661e-08	19	63	1950	30472	tRNA aminoacylation	AT3G55400|AT4G26300|AT3G02660|AT5G52520|AT2G31170|AT1G11870|AT1G14610|AT5G64050|AT5G49030|AT4G04350|AT5G16715|AT3G13490|AT5G56680|AT2G25840|AT2G04842|AT1G25350|AT3G48110|AT4G17300|AT5G22800
9408	7.8417e-09	5.7776e-08	35	186	1950	30472	response to heat	AT3G08970|AT3G06010|AT3G25230|AT5G48030|AT5G53400|AT1G09080|AT4G23100|AT5G03280|AT3G11020|AT5G28540|AT5G37770|AT5G58070|AT5G43940|AT1G05850|AT2G22240|AT2G04030|AT5G56030|AT4G38630|AT3G04120|AT1G64520|AT5G17020|AT5G42020|AT5G67180|AT1G07890|AT1G66340|AT4G15802|AT1G09090|AT5G60410|AT3G44110|AT4G29040|AT5G06780|AT3G47860|AT5G45710|AT1G54490|AT2G46240
9966	8.6152e-09	6.3274e-08	17	51	1950	30472	regulation of signal transduction	AT4G29810|AT1G13980|AT2G39810|AT2G28290|AT2G17820|AT3G52430|AT1G66340|AT5G63980|AT3G21220|AT4G24580|AT5G10720|AT1G18080|AT3G45640|AT1G48630|AT3G18130|AT1G51660|AT1G01960
23051	8.6152e-09	6.3274e-08	17	51	1950	30472	regulation of signaling process	AT4G29810|AT1G13980|AT2G39810|AT2G28290|AT2G17820|AT3G52430|AT1G66340|AT5G63980|AT3G21220|AT4G24580|AT5G10720|AT1G18080|AT3G45640|AT1G48630|AT3G18130|AT1G51660|AT1G01960
30036	9.4318e-09	6.9162e-08	21	77	1950	30472	actin cytoskeleton organization	AT4G01710|AT3G23670|AT5G18410|AT3G27000|AT2G38440|AT5G56600|AT5G18700|AT4G29350|AT5G35700|AT2G35110|AT2G19760|AT2G22640|AT2G46225|AT1G30825|AT5G54650|AT3G61650|AT1G13180|AT5G05620|AT4G14150|AT3G13870|AT4G30160
35468	1.0226e-08	7.4752e-08	15	40	1950	30472	positive regulation of signaling pathway	AT4G24210|AT3G05120|AT3G52430|AT5G27320|AT1G67890|AT4G03110|AT1G48270|AT2G32460|AT3G63010|AT5G03280|AT5G06100|AT3G15150|AT1G07430|AT2G26300|AT3G15730
19216	1.0226e-08	7.4752e-08	15	40	1950	30472	regulation of lipid metabolic process	AT5G63980|AT4G03560|AT1G06515|AT5G61730|AT1G79700|AT2G45400|AT4G38350|AT1G16060|AT1G42470|AT3G47860|AT1G04020|AT3G47450|AT1G20780|AT1G21970|AT5G05700
16301	1.0346e-08	7.5505e-08	148	1450	1950	30472	kinase activity	AT2G39800|AT3G07980|AT4G08920|AT5G18700|AT4G04040|AT1G73500|AT4G28650|AT3G05840|AT3G01640|AT4G02260|AT2G18790|AT3G14270|AT2G01820|AT1G27320|AT5G64960|AT5G37850|AT1G50460|AT1G75640|AT5G45800|AT1G09970|AT3G01090|AT1G63700|AT5G42810|AT5G67260|AT4G23250|AT3G49670|AT1G09570|AT3G54180|AT2G44680|AT2G01830|AT4G18710|AT5G07370|AT4G08480|AT2G01950|AT2G26830|AT1G51660|AT4G30340|AT1G54130|AT3G53810|AT2G41210…
46686	1.0641e-08	7.7533e-08	51	338	1950	30472	response to cadmium ion	AT3G02570|AT3G09600|AT3G09840|AT1G09780|AT5G58270|AT1G78870|AT4G14880|AT3G12810|AT3G04120|AT5G42020|AT5G47390|AT2G37630|AT1G74560|AT2G21660|AT4G29040|AT3G48990|AT2G47470|AT2G43750|AT3G15730|AT4G38740|AT5G17310|AT4G24190|AT3G25230|AT1G70730|AT5G15650|AT4G08500|AT1G23190|AT3G22200|AT3G22960|AT4G23100|AT1G18080|AT2G46830|AT3G12670|AT2G33800|AT4G16760|AT5G52920|AT1G60420|AT1G07890|AT1G34550|AT2G17420…
10449	1.1112e-08	8.0841e-08	8	10	1950	30472	root meristem growth	AT5G45550|AT5G05980|AT4G08500|AT4G07410|AT3G03773|AT1G51190|AT4G02450|AT3G20840
80008	1.1243e-08	8.1669e-08	27	122	1950	30472	CUL4 RING ubiquitin ligase complex	AT5G46210|AT5G23730|AT3G08850|AT1G15440|AT4G05410|AT3G56990|AT2G32950|AT2G41500|AT1G49040|AT3G20740|AT4G29860|AT3G44600|AT4G35560|AT4G31160|AT5G13480|AT3G05090|AT5G58230|AT4G29830|AT5G52820|AT2G34260|AT2G19520|AT4G34460|AT4G29380|AT4G15900|AT5G05970|AT2G47990|AT2G46340
9668	1.1915e-08	8.6409e-08	14	35	1950	30472	plastid membrane organization	AT5G18570|AT1G35680|AT1G03160|AT2G30950|AT1G56200|AT1G32500|AT5G35220|AT5G12130|AT1G06430|AT3G10670|AT3G47450|AT2G26300|AT2G07050|AT4G31780
16020	1.244e-08	9.0076e-08	680	8900	1950	30472	membrane	AT3G59900|AT3G11964|AT4G21060|AT1G09100|AT4G29900|AT3G08550|AT2G30950|AT5G64560|AT3G53480|AT5G03280|AT1G69640|AT1G43130|AT3G44880|AT5G45800|AT1G79560|AT3G05290|AT4G14880|AT5G22800|AT2G25110|AT4G23250|AT5G40480|AT5G19620|AT2G40400|AT2G38440|AT2G17720|AT3G21640|AT4G24580|AT4G37890|AT5G53550|AT5G55730|AT1G78240|AT3G07360|AT2G02480|AT3G63290|AT1G01960|AT4G38740|AT4G01430|AT4G00100|AT4G01550|AT5G45940…
51052	1.3627e-08	9.8517e-08	19	65	1950	30472	regulation of DNA metabolic process	AT3G54560|AT1G55350|AT1G33240|AT5G24330|AT4G11920|AT5G67100|AT4G29860|AT2G34780|AT3G12280|AT1G69380|AT1G75950|AT2G23430|AT5G09790|AT3G15150|AT2G18290|AT1G79950|AT1G20330|AT1G78770|AT5G55390
32268	1.3874e-08	1.0013e-07	35	190	1950	30472	regulation of cellular protein metabolic process	AT1G13120|AT3G57860|AT5G21150|AT2G32950|AT3G24440|AT5G25890|AT1G18080|AT3G44600|AT4G22910|AT2G18290|AT1G77300|AT1G04020|AT5G37055|AT5G45600|AT4G39100|AT5G53180|AT4G22140|AT3G01150|AT1G79280|AT2G06210|AT1G09570|AT4G11920|AT4G05440|AT3G57290|AT2G39990|AT1G13950|AT2G42260|AT1G48630|AT1G48410|AT5G10480|AT5G43810|AT3G48430|AT5G55390|AT2G26130|AT4G38740
31056	1.3893e-08	1.0013e-07	11	21	1950	30472	regulation of histone modification	AT4G22140|AT3G44600|AT2G06210|AT3G24440|AT1G77300|AT1G04020|AT3G48430|AT5G37055|AT5G45600|AT5G55390|AT4G39100
51607	1.5172e-08	1.0917e-07	15	41	1950	30472	defense response to virus	AT5G20320|AT5G21150|AT5G23570|AT3G49500|AT5G24590|AT1G69440|AT2G35980|AT5G08120|AT4G20910|AT1G01040|AT1G48410|AT5G43810|AT2G22240|AT5G42810|AT1G04400
9825	1.6666e-08	1.1974e-07	17	53	1950	30472	multidimensional cell growth	AT5G17690|AT1G12560|AT1G80350|AT4G01710|AT1G03060|AT3G08550|AT3G27000|AT2G35110|AT1G49040|AT1G69490|AT4G18710|AT5G55540|AT1G13180|AT3G46550|AT1G20330|AT1G05850|AT5G28646
46890	2.0105e-08	1.4422e-07	13	31	1950	30472	regulation of lipid biosynthetic process	AT5G63980|AT4G03560|AT1G06515|AT5G61730|AT1G79700|AT2G45400|AT4G38350|AT1G16060|AT1G42470|AT1G04020|AT3G47450|AT1G20780|AT1G21970
44434	2.0279e-08	1.4525e-07	143	1403	1950	30472	chloroplast part	AT5G22640|AT3G08550|AT2G30950|AT5G63110|AT5G14220|AT5G46290|AT2G34590|AT1G30100|AT3G57280|AT2G37860|AT4G35460|AT1G78630|AT5G05980|AT3G44880|AT5G58270|AT1G79560|AT1G74030|AT4G14880|AT1G80600|AT5G22800|AT1G70070|AT4G31780|AT1G64520|AT2G31530|AT5G19620|AT2G40400|AT5G63980|AT5G23040|AT5G54800|AT3G23940|AT3G56090|AT3G20440|AT1G51660|AT1G74960|AT3G47860|AT1G07420|AT4G32400|AT2G43750|AT5G58560|AT4G30580…
10218	2.3579e-08	1.6807e-07	16	48	1950	30472	response to far red light	AT2G37678|AT2G35940|AT4G08920|AT3G28860|AT1G09570|AT5G24470|AT1G14920|AT2G18790|AT1G25540|AT1G22770|AT3G18780|AT1G48410|AT5G11260|AT2G01570|AT2G46340|AT4G16780
16875	2.361e-08	1.6807e-07	19	67	1950	30472	ligase activity, forming carbon-oxygen bonds	AT3G55400|AT4G26300|AT3G02660|AT5G52520|AT2G31170|AT1G11870|AT1G14610|AT5G64050|AT5G49030|AT4G04350|AT5G16715|AT3G13490|AT5G56680|AT2G25840|AT2G04842|AT1G25350|AT3G48110|AT4G17300|AT5G22800
16876	2.361e-08	1.6807e-07	19	67	1950	30472	ligase activity, forming aminoacyl-tRNA and related compounds	AT3G55400|AT4G26300|AT3G02660|AT5G52520|AT2G31170|AT1G11870|AT1G14610|AT5G64050|AT5G49030|AT4G04350|AT5G16715|AT3G13490|AT5G56680|AT2G25840|AT2G04842|AT1G25350|AT3G48110|AT4G17300|AT5G22800
4812	2.361e-08	1.6807e-07	19	67	1950	30472	aminoacyl-tRNA ligase activity	AT3G55400|AT4G26300|AT3G02660|AT5G52520|AT2G31170|AT1G11870|AT1G14610|AT5G64050|AT5G49030|AT4G04350|AT5G16715|AT3G13490|AT5G56680|AT2G25840|AT2G04842|AT1G25350|AT3G48110|AT4G17300|AT5G22800
42023	2.6172e-08	1.8602e-07	11	22	1950	30472	DNA endoreduplication	AT2G42260|AT1G69690|AT5G24630|AT4G22910|AT5G04470|AT1G15570|AT3G48750|AT3G20780|AT4G38600|AT1G48380|AT3G54180
33044	2.7774e-08	1.971e-07	14	37	1950	30472	regulation of chromosome organization	AT4G22140|AT3G01460|AT2G06210|AT3G24440|AT4G22970|AT3G44600|AT1G77300|AT1G04020|AT3G48430|AT5G37055|AT5G45600|AT5G39550|AT5G55390|AT4G39100
6575	2.9418e-08	2.0845e-07	63	473	1950	30472	cellular amino acid derivative metabolic process	AT3G02130|AT1G10370|AT4G08920|AT4G31500|AT3G07020|AT1G12910|AT1G73500|AT4G00040|AT1G25220|AT2G45400|AT4G11850|AT5G05980|AT5G05340|AT1G05010|AT5G05860|AT1G05850|AT3G06300|AT4G26200|AT5G47990|AT1G15110|AT5G48840|AT2G17720|AT1G31340|AT3G15010|AT4G37770|AT4G13940|AT3G10160|AT2G26830|AT1G01480|AT3G44550|AT1G17020|AT1G02050|AT1G05680|AT4G11280|AT3G15730|AT2G26670|AT1G55180|AT4G25640|AT2G30490|AT2G32950…
5874	3.0268e-08	2.1415e-07	33	178	1950	30472	microtubule	AT3G23670|AT3G54870|AT5G17410|AT5G18700|AT4G22970|AT3G04630|AT1G14830|AT4G01370|AT1G68060|AT3G63480|AT3G16630|AT4G21800|AT3G43210|AT3G44200|AT2G44190|AT5G05620|AT5G44610|AT5G28646|AT1G01510|AT1G01950|AT1G80350|AT5G22370|AT3G60740|AT5G42080|AT2G34680|AT4G26760|AT5G55230|AT1G18370|AT4G27060|AT3G61650|AT3G48750|AT4G14150|AT5G05970
10022	3.063e-08	2.1638e-07	10	18	1950	30472	meristem determinacy	AT5G18560|AT4G24540|AT3G55510|AT2G22540|AT2G33860|AT5G11530|AT4G28190|AT5G03790|AT4G17460|AT2G15790
43621	3.208e-08	2.2559e-07	15	43	1950	30472	protein self-association	AT4G25320|AT1G20900|AT3G01680|AT3G01670|AT1G68130|AT3G53180|AT1G02410|AT2G45430|AT1G76500|AT5G58440|AT1G75820|AT5G65700|AT1G50030|AT4G17460|AT5G51590
44087	3.208e-08	2.2559e-07	15	43	1950	30472	regulation of cellular component biogenesis	AT3G05530|AT1G09100|AT5G56600|AT4G29350|AT2G19760|AT1G06515|AT5G55230|AT4G38350|AT4G29040|AT1G42470|AT5G13010|AT1G08410|AT5G44610|AT4G30160|AT2G20140
48232	3.208e-08	2.2559e-07	15	43	1950	30472	male gamete generation	AT1G64110|AT2G06510|AT3G54650|AT5G57800|AT3G04620|AT4G35560|AT5G06100|AT4G29040|AT1G18450|AT2G46040|AT3G07160|AT3G11440|AT1G06520|AT5G59030|AT2G20140
9554	3.2863e-08	2.3039e-07	7	8	1950	30472	megasporogenesis	AT5G45550|AT4G37450|AT5G21150|AT5G35770|AT5G67600|AT2G41420|AT5G46700
10358	3.2863e-08	2.3039e-07	7	8	1950	30472	leaf shaping	AT3G44600|AT3G50660|AT3G52770|AT1G27370|AT1G73590|AT3G15730|AT2G45450
6633	3.5889e-08	2.5122e-07	36	206	1950	30472	fatty acid biosynthetic process	AT1G10670|AT1G55020|AT3G54010|AT5G23570|AT5G57800|AT2G38110|AT1G68530|AT5G46290|AT1G17420|AT3G22400|AT1G49430|AT1G73680|AT5G49070|AT1G69640|AT3G01090|AT4G16760|AT1G06520|AT5G23940|AT5G52920|AT1G67730|AT4G29010|AT2G35690|AT4G25050|AT1G01120|AT2G16280|AT1G72520|AT1G19440|AT5G10480|AT1G74960|AT1G25450|AT1G07420|AT1G76680|AT1G14290|AT4G33950|AT1G36160|AT2G26250
5975	3.5947e-08	2.5125e-07	127	1218	1950	30472	carbohydrate metabolic process	AT3G02570|AT4G21060|AT3G08550|AT5G49720|AT4G28370|AT4G04040|AT2G34590|AT1G19300|AT3G29810|AT5G66460|AT3G01640|AT1G50460|AT3G01090|AT1G74030|AT2G22240|AT5G42810|AT1G27600|AT3G04120|AT2G35610|AT1G35580|AT5G22510|AT1G12240|AT3G55830|AT3G04240|AT5G16910|AT3G20440|AT5G11110|AT2G20610|AT2G41850|AT1G78240|AT3G45040|AT1G10670|AT3G02230|AT5G24400|AT1G34120|AT5G17310|AT5G15650|AT1G33430|AT1G23190|AT1G02720…
31400	3.8438e-08	2.6826e-07	8	11	1950	30472	negative regulation of protein modification process	AT4G22140|AT2G42260|AT1G79280|AT3G57860|AT5G10480|AT1G04020|AT3G48430|AT4G39100
65009	3.9024e-08	2.7193e-07	38	225	1950	30472	regulation of molecular function	AT3G29035|AT1G13980|AT5G23730|AT5G17690|AT3G57860|AT1G09000|AT3G52770|AT5G63770|AT4G21540|AT1G48270|AT2G23430|AT2G46830|AT5G39610|AT4G22910|AT2G18290|AT5G04470|AT5G58270|AT2G31305|AT1G61620|AT3G48360|AT4G29810|AT4G11920|AT3G60740|AT3G21220|AT4G28980|AT4G24580|AT4G14850|AT2G42260|AT1G74660|AT3G44110|AT3G45640|AT4G19600|AT1G51660|AT1G01060|AT4G30340|AT2G23380|AT1G01960|AT1G04950
6972	3.9971e-08	2.7811e-07	19	69	1950	30472	hyperosmotic response	AT3G03450|AT5G17490|AT2G39800|AT3G55610|AT4G24960|AT4G30960|AT5G26751|AT5G49720|AT3G19580|AT1G66350|AT1G14920|AT4G01370|AT3G61140|AT5G11530|AT5G37850|AT1G05680|AT5G58070|AT2G01570|AT2G43000
51510	4.1383e-08	2.875e-07	14	38	1950	30472	regulation of unidimensional cell growth	AT2G03060|AT1G60420|AT4G08920|AT5G56600|AT5G63980|AT1G18750|AT4G38430|AT2G20000|AT2G41630|AT4G32551|AT3G13530|AT3G07160|AT3G46290|AT5G54380
51179	4.4793e-08	3.1073e-07	220	2416	1950	30472	localization	AT5G42890|AT4G29900|AT3G05040|AT5G64560|AT3G53480|AT3G57280|AT5G61730|AT5G03280|AT1G76850|AT3G05290|AT1G70070|AT5G40480|AT3G54220|AT3G56640|AT4G29350|AT5G58440|AT2G01830|AT2G21660|AT3G56090|AT5G53550|AT2G01950|AT4G32400|AT4G16370|AT1G73590|AT1G01960|AT5G47200|AT3G27530|AT5G17310|AT3G28860|AT2G36910|AT4G22970|AT1G72150|AT2G02810|AT2G47000|AT4G29810|AT1G14360|AT5G23660|AT1G15690|AT5G56600|AT1G23080…
70646	4.8375e-08	3.3508e-07	18	63	1950	30472	protein modification by small protein removal	AT1G10570|AT1G02090|AT5G14250|AT5G42970|AT1G60220|AT1G65650|AT1G17110|AT5G16310|AT3G49600|AT3G20630|AT4G26430|AT4G24560|AT3G61140|AT1G71230|AT2G26990|AT1G22920|AT5G56280|AT4G14110
42398	5.09e-08	3.5204e-07	48	324	1950	30472	cellular amino acid derivative biosynthetic process	AT4G25640|AT2G30490|AT4G31500|AT2G16500|AT3G07020|AT1G56430|AT5G19530|AT1G12910|AT2G37040|AT1G73500|AT4G23100|AT3G25710|AT4G00040|AT1G25220|AT2G45400|AT2G41060|AT3G44540|AT5G05980|AT5G05340|AT1G05010|AT4G34710|AT5G05860|AT3G11340|AT1G05850|AT5G22500|AT2G43000|AT4G26200|AT1G15110|AT3G56860|AT5G48840|AT1G31340|AT5G23260|AT5G08170|AT3G15010|AT4G37770|AT1G29410|AT3G10160|AT2G26830|AT1G01480|AT3G44550…
9787	5.1583e-08	3.5623e-07	19	70	1950	30472	regulation of abscisic acid mediated signaling pathway	AT2G25170|AT5G23320|AT3G51550|AT1G67890|AT1G48270|AT5G10720|AT2G32460|AT5G60410|AT4G34460|AT5G03280|AT5G11310|AT5G06100|AT5G13680|AT1G07430|AT5G08335|AT2G26300|AT1G01720|AT5G59220|AT3G15730
10608	5.8253e-08	4.017e-07	43	276	1950	30472	posttranscriptional regulation of gene expression	AT5G20320|AT1G13120|AT5G21150|AT5G23570|AT3G05040|AT5G63110|AT5G25890|AT3G49500|AT1G69440|AT1G18080|AT4G20910|AT3G17185|AT1G61620|AT5G53180|AT1G70070|AT5G56030|AT4G31877|AT3G01150|AT1G32490|AT1G09570|AT5G23880|AT3G56860|AT4G05440|AT2G13540|AT2G39175|AT5G61780|AT3G57290|AT2G39990|AT1G13950|AT5G23080|AT2G46685|AT4G13940|AT1G48630|AT1G01040|AT1G48410|AT5G13010|AT5G13570|AT2G27100|AT5G46845|AT5G43810…
9785	6.0935e-08	4.1894e-07	10	19	1950	30472	blue light signaling pathway	AT4G08920|AT2G26300|AT5G20730|AT1G48270|AT4G28880|AT1G21970|AT2G36890|AT1G04400|AT4G38740|AT4G28860
30522	6.0935e-08	4.1894e-07	10	19	1950	30472	intracellular receptor mediated signaling pathway	AT4G08920|AT2G26300|AT5G20730|AT1G48270|AT4G28880|AT1G21970|AT2G36890|AT1G04400|AT4G38740|AT4G28860
9532	6.1657e-08	4.2327e-07	83	705	1950	30472	plastid stroma	AT5G46290|AT1G78630|AT5G05980|AT5G61410|AT3G10670|AT1G74030|AT4G14880|AT1G80600|AT5G22800|AT1G70070|AT5G18570|AT3G02660|AT5G63980|AT5G23040|AT3G21200|AT3G23940|AT2G31170|AT2G39730|AT4G04350|AT5G16715|AT3G56090|AT3G20440|AT1G48850|AT1G51660|AT1G74960|AT1G79530|AT3G48110|AT3G48990|AT4G34740|AT4G01800|AT2G43750|AT4G17300|AT5G01600|AT3G55400|AT1G62750|AT5G26742|AT5G24400|AT4G32810|AT3G06350|AT1G70730…
8023	6.215e-08	4.2603e-07	9	15	1950	30472	transcription elongation factor complex	AT4G29830|AT2G06210|AT3G28730|AT1G61040|AT3G22590|AT1G79730|AT5G50320|AT5G61150|AT4G10710
31329	6.2444e-08	4.2741e-07	16	51	1950	30472	regulation of cellular catabolic process	AT4G24960|AT3G57860|AT2G32950|AT3G54320|AT3G60740|AT4G24580|AT2G42260|AT3G44110|AT1G50030|AT1G27320|AT2G18290|AT5G35750|AT1G20780|AT1G54490|AT2G46240|AT2G26130
44435	6.3735e-08	4.356e-07	144	1442	1950	30472	plastid part	AT5G22640|AT3G08550|AT2G30950|AT5G63110|AT5G14220|AT5G46290|AT2G34590|AT1G30100|AT3G57280|AT2G37860|AT4G35460|AT1G78630|AT5G05980|AT3G44880|AT5G58270|AT1G79560|AT1G74030|AT4G14880|AT1G80600|AT5G22800|AT1G70070|AT4G31780|AT1G64520|AT2G31530|AT5G19620|AT2G40400|AT5G63980|AT5G23040|AT5G54800|AT3G23940|AT3G56090|AT3G20440|AT1G51660|AT1G74960|AT3G47860|AT1G07420|AT4G32400|AT2G43750|AT5G58560|AT4G30580…
44242	6.6222e-08	4.5193e-07	19	71	1950	30472	cellular lipid catabolic process	AT1G55180|AT3G05630|AT5G45340|AT5G42890|AT3G04460|AT5G27520|AT4G32810|AT4G29010|AT2G35690|AT3G06810|AT5G08370|AT4G14430|AT1G79810|AT5G13790|AT3G51840|AT3G05290|AT4G16760|AT4G19230|AT2G26350
1709	6.8182e-08	4.6258e-07	6	6	1950	30472	cell fate determination	AT5G23630|AT3G12680|AT4G24972|AT2G41500|AT1G03770|AT5G44280
9939	6.8182e-08	4.6258e-07	6	6	1950	30472	positive regulation of gibberellic acid mediated signaling pathway	AT4G24210|AT3G63010|AT3G05120|AT5G27320|AT1G07430|AT1G48270
42991	6.8182e-08	4.6258e-07	6	6	1950	30472	transcription factor import into nucleus	AT2G46310|AT4G27950|AT3G61630|AT4G23750|AT5G53290|AT4G11140
48830	6.8182e-08	4.6258e-07	6	6	1950	30472	adventitious root development	AT3G03660|AT4G31500|AT1G48410|AT2G20610|AT1G77850|AT5G17810
42538	7.4984e-08	5.0724e-07	17	58	1950	30472	hyperosmotic salinity response	AT3G03450|AT5G17490|AT2G39800|AT3G55610|AT4G24960|AT4G30960|AT5G26751|AT5G49720|AT3G19580|AT1G66350|AT1G14920|AT5G11530|AT5G37850|AT1G05680|AT5G58070|AT2G01570|AT2G43000
71367	7.4984e-08	5.0724e-07	17	58	1950	30472	cellular response to brassinosteroid stimulus	AT1G14000|AT1G34210|AT3G51550|AT1G71830|AT2G13790|AT1G48270|AT4G39400|AT2G42580|AT4G18710|AT1G74500|AT2G01950|AT2G44080|AT2G41230|AT1G75080|AT3G46290|AT5G54380|AT4G38740
6399	7.921e-08	5.3504e-07	29	150	1950	30472	tRNA metabolic process	AT3G55400|AT3G24560|AT1G14610|AT5G59980|AT5G13680|AT5G22800|AT1G13870|AT4G26300|AT3G02660|AT3G04680|AT5G52520|AT4G35910|AT5G50320|AT2G31170|AT1G11870|AT5G64050|AT5G49030|AT4G04350|AT5G16715|AT3G13490|AT5G56680|AT1G72560|AT1G04635|AT2G25840|AT2G04842|AT1G25350|AT3G48110|AT4G17300|AT2G45330
71669	8.6288e-08	5.8201e-07	36	213	1950	30472	plant-type cell wall organization or biogenesis	AT3G01040|AT2G35620|AT3G02230|AT5G15470|AT3G08550|AT5G15650|AT4G28370|AT4G26690|AT3G57280|AT3G29810|AT1G68060|AT4G36890|AT1G02720|AT2G46710|AT4G32551|AT1G79580|AT1G27600|AT5G55480|AT4G11150|AT2G35610|AT3G55830|AT1G33280|AT1G12560|AT4G00730|AT1G64440|AT5G22130|AT1G80350|AT3G56960|AT5G42080|AT5G16910|AT5G63800|AT1G02730|AT2G32700|AT2G41850|AT2G41210|AT3G13870
2252	9.023e-08	6.0771e-07	15	46	1950	30472	immune effector process	AT5G20320|AT5G21150|AT5G23570|AT3G49500|AT5G24590|AT1G69440|AT2G35980|AT5G08120|AT4G20910|AT1G01040|AT1G48410|AT5G43810|AT2G22240|AT5G42810|AT1G04400
19898	9.4272e-08	6.3401e-07	26	126	1950	30472	extrinsic to membrane	AT5G24740|AT5G23730|AT3G49660|AT3G19190|AT1G31930|AT3G20740|AT3G22942|AT5G07120|AT1G18080|AT3G62770|AT4G22910|AT3G18130|AT3G63420|AT5G50230|AT2G26300|AT4G16340|AT2G26060|AT4G29830|AT3G21060|AT4G11920|AT2G34260|AT5G06140|AT4G34460|AT5G58440|AT1G48410|AT2G46340
8356	1.0879e-07	7.3061e-07	8	12	1950	30472	asymmetric cell division	AT4G37650|AT3G12280|AT1G69770|AT3G54220|AT1G55540|AT3G48750|AT2G37630|AT5G49160
9101	1.1259e-07	7.55e-07	23	103	1950	30472	glycoprotein biosynthetic process	AT2G35610|AT3G55830|AT4G21060|AT1G08660|AT3G21160|AT3G06440|AT3G04240|AT1G08030|AT4G02500|AT1G16570|AT1G74800|AT1G33430|AT1G30000|AT3G62720|AT1G67490|AT5G03080|AT5G62620|AT3G11540|AT1G51590|AT3G45040|AT5G02410|AT2G25110|AT1G27600
8380	1.1858e-07	7.9403e-07	37	225	1950	30472	RNA splicing	AT3G23070|AT4G03430|AT5G16780|AT3G55220|AT2G41500|AT3G55200|AT5G63370|AT1G60170|AT2G35340|AT4G14300|AT1G74350|AT1G03910|AT5G62640|AT1G02140|AT1G77180|AT5G53180|AT1G70070|AT3G01150|AT1G32490|AT4G02990|AT5G27720|AT1G09230|AT3G04680|AT1G30010|AT2G13540|AT1G49590|AT4G14510|AT2G21660|AT1G27650|AT4G15900|AT5G13010|AT2G27100|AT4G31770|AT5G42820|AT2G43410|AT4G31010|AT2G45330
6357	1.1893e-07	7.9523e-07	21	88	1950	30472	regulation of transcription from RNA polymerase II promoter	AT3G05530|AT1G13870|AT1G09100|AT1G63210|AT5G50320|AT5G61150|AT5G47390|AT2G38560|AT4G21670|AT3G04740|AT3G12280|AT2G22300|AT4G19600|AT4G29040|AT5G01270|AT3G42170|AT1G04020|AT1G79000|AT1G02680|AT5G13080|AT2G20140
44282	1.2049e-07	8.0447e-07	43	283	1950	30472	small molecule catabolic process	AT5G24400|AT5G45340|AT5G42890|AT2G16500|AT1G09780|AT1G70730|AT4G10500|AT4G26270|AT4G04040|AT2G34590|AT2G37040|AT1G23190|AT3G22200|AT3G06810|AT3G22960|AT5G01040|AT5G61410|AT1G50460|AT2G21170|AT4G34710|AT3G51840|AT3G05290|AT4G16760|AT1G74030|AT4G19230|AT5G05920|AT3G04120|AT5G52920|AT1G34430|AT3G04460|AT5G27520|AT4G29010|AT2G35690|AT1G16300|AT4G14430|AT1G79810|AT5G13790|AT1G79530|AT3G48990|AT3G08590…
4428	1.257e-07	8.3806e-07	14	41	1950	30472	inositol or phosphatidylinositol kinase activity	AT5G64070|AT1G60490|AT3G56960|AT3G14270|AT5G07370|AT5G09350|AT1G50030|AT5G61760|AT1G77740|AT2G41210|AT2G26420|AT5G42810|AT4G33240|AT4G33770
16441	1.3134e-07	8.7442e-07	26	128	1950	30472	posttranscriptional gene silencing	AT5G20320|AT5G23570|AT3G05040|AT5G63110|AT3G49500|AT1G69440|AT4G20910|AT3G17185|AT1G70070|AT4G31877|AT1G32490|AT5G23880|AT2G13540|AT2G39175|AT5G61780|AT5G23080|AT2G46685|AT4G13940|AT1G01040|AT1G48410|AT5G13010|AT5G13570|AT2G27100|AT5G46845|AT2G27840|AT1G09700
10582	1.3394e-07	8.9043e-07	9	16	1950	30472	floral meristem determinacy	AT5G18560|AT4G24540|AT3G55510|AT2G22540|AT2G33860|AT4G28190|AT5G03790|AT4G17460|AT2G15790
8219	1.3526e-07	8.966e-07	28	145	1950	30472	cell death	AT4G08920|AT3G52430|AT5G48030|AT2G13790|AT4G03110|AT2G39200|AT5G02190|AT5G03280|AT2G41060|AT3G62770|AT3G44880|AT5G43940|AT2G26300|AT3G27060|AT3G54420|AT1G32230|AT3G56860|AT5G22290|AT3G21220|AT5G23040|AT2G43790|AT3G15010|AT3G45640|AT1G51660|AT5G64930|AT5G50260|AT2G01290|AT4G38740
16265	1.3526e-07	8.966e-07	28	145	1950	30472	death	AT4G08920|AT3G52430|AT5G48030|AT2G13790|AT4G03110|AT2G39200|AT5G02190|AT5G03280|AT2G41060|AT3G62770|AT3G44880|AT5G43940|AT2G26300|AT3G27060|AT3G54420|AT1G32230|AT3G56860|AT5G22290|AT3G21220|AT5G23040|AT2G43790|AT3G15010|AT3G45640|AT1G51660|AT5G64930|AT5G50260|AT2G01290|AT4G38740
8284	1.3821e-07	9.1356e-07	11	25	1950	30472	positive regulation of cell proliferation	AT3G15150|AT5G22220|AT5G51451|AT2G04025|AT5G13680|AT3G48750|AT3G11220|AT5G60810|AT3G04740|AT4G32880|AT1G13620
71483	1.3821e-07	9.1356e-07	11	25	1950	30472	cellular response to blue light	AT4G08920|AT2G26300|AT5G20730|AT1G48270|AT4G28880|AT1G21970|AT2G36890|AT1G04400|AT4G38740|AT2G36990|AT4G28860
43455	1.7065e-07	1.1264e-06	15	48	1950	30472	regulation of secondary metabolic process	AT1G64520|AT2G26170|AT2G25180|AT4G31920|AT2G39175|AT1G69690|AT5G13680|AT5G04410|AT5G46845|AT5G11260|AT3G16857|AT3G11220|AT1G20780|AT1G09530|AT2G28350
34470	1.7833e-07	1.1754e-06	42	277	1950	30472	ncRNA processing	AT3G55620|AT3G11964|AT1G15440|AT5G16780|AT4G05410|AT3G24560|AT2G34570|AT5G59980|AT1G16280|AT1G31817|AT1G17690|AT5G02250|AT2G21070|AT5G13680|AT1G48920|AT5G22800|AT3G51800|AT5G18570|AT1G13870|AT4G20060|AT4G01560|AT3G04680|AT4G35910|AT5G50320|AT4G27490|AT5G16750|AT2G13540|AT1G31660|AT5G41190|AT2G17250|AT1G72560|AT1G04635|AT3G60360|AT1G01040|AT5G10360|AT5G13010|AT2G27100|AT1G08410|AT2G47990|AT2G20490…
23034	1.8043e-07	1.1876e-06	54	400	1950	30472	intracellular signaling pathway	AT3G08510|AT4G08920|AT3G22420|AT1G48270|AT2G36890|AT5G07120|AT1G20090|AT2G18390|AT1G25580|AT1G02900|AT3G12690|AT3G01090|AT4G16340|AT1G04400|AT5G64070|AT2G31650|AT1G10940|AT5G63980|AT1G32870|AT4G28860|AT4G34460|AT5G58440|AT3G45640|AT1G51660|AT5G20730|AT4G38740|AT2G26670|AT5G47200|AT2G34650|AT3G08850|AT1G60490|AT1G09000|AT5G63770|AT4G08500|AT1G31930|AT2G02810|AT4G17615|AT2G26700|AT1G51170|AT2G26300…
44036	1.8156e-07	1.1933e-06	26	130	1950	30472	cell wall macromolecule metabolic process	AT3G01040|AT4G21060|AT5G15470|AT4G02500|AT2G22900|AT1G19300|AT4G26690|AT3G29810|AT5G66460|AT5G49360|AT4G36890|AT4G32551|AT1G05850|AT2G25110|AT1G27600|AT5G55480|AT3G54420|AT2G35610|AT3G55830|AT3G62720|AT4G28320|AT1G14720|AT2G43570|AT2G01850|AT2G32700|AT1G74380
9526	1.8392e-07	1.2071e-06	81	700	1950	30472	plastid envelope	AT5G22640|AT3G08630|AT1G03160|AT2G30950|AT5G63110|AT5G14220|AT5G46290|AT2G34590|AT3G57280|AT2G37860|AT4G35460|AT5G03080|AT3G46740|AT1G78630|AT5G61410|AT4G38490|AT3G44880|AT5G53860|AT5G12470|AT5G58270|AT1G79560|AT5G58070|AT4G31780|AT5G18570|AT1G64520|AT5G22790|AT3G08640|AT2G31530|AT5G19620|AT2G40400|AT3G07430|AT5G17520|AT5G23040|AT5G54800|AT2G39730|AT3G56090|AT1G50250|AT5G35220|AT1G07420|AT4G32400…
44421	1.9135e-07	1.2541e-06	29	156	1950	30472	extracellular region part	AT1G63245|AT3G49780|AT1G68795|AT1G73965|AT1G70895|AT5G65870|AT1G13620|AT2G01505|AT5G49360|AT2G22860|AT5G64667|AT2G46710|AT3G63440|AT2G02850|AT3G18715|AT5G03540|AT4G13195|AT3G28455|AT1G68765|AT3G24770|AT1G13590|AT1G71696|AT1G49005|AT5G51451|AT2G04025|AT1G05065|AT2G34925|AT5G50260|AT5G60810
9536	1.927e-07	1.2611e-06	346	4193	1950	30472	plastid	AT2G35720|AT5G17690|AT2G34630|AT5G42890|AT3G08550|AT2G41720|AT2G30950|AT5G63110|AT3G57280|AT4G35460|AT2G20585|AT1G50460|AT3G18110|AT3G44880|AT2G27530|AT1G79560|AT1G02140|AT3G48680|AT4G14880|AT5G22800|AT2G25110|AT1G70070|AT4G31780|AT3G05970|AT1G64520|AT5G19620|AT2G40400|AT4G29350|AT5G66055|AT3G23940|AT3G04400|AT3G52280|AT1G30610|AT2G18020|AT4G14510|AT2G21660|AT3G56090|AT3G20440|AT1G51660|AT4G27060…
9742	2.0277e-07	1.3214e-06	16	55	1950	30472	brassinosteroid mediated signaling pathway	AT1G14000|AT1G34210|AT3G51550|AT1G71830|AT2G13790|AT1G48270|AT4G39400|AT2G42580|AT4G18710|AT1G74500|AT2G01950|AT2G44080|AT1G75080|AT3G46290|AT5G54380|AT4G38740
43401	2.0277e-07	1.3214e-06	16	55	1950	30472	steroid hormone mediated signaling pathway	AT1G14000|AT1G34210|AT3G51550|AT1G71830|AT2G13790|AT1G48270|AT4G39400|AT2G42580|AT4G18710|AT1G74500|AT2G01950|AT2G44080|AT1G75080|AT3G46290|AT5G54380|AT4G38740
71383	2.0277e-07	1.3214e-06	16	55	1950	30472	cellular response to steroid hormone stimulus	AT1G14000|AT1G34210|AT3G51550|AT1G71830|AT2G13790|AT1G48270|AT4G39400|AT2G42580|AT4G18710|AT1G74500|AT2G01950|AT2G44080|AT1G75080|AT3G46290|AT5G54380|AT4G38740
139	2.0461e-07	1.3296e-06	51	370	1950	30472	Golgi membrane	AT3G01040|AT1G10130|AT4G21060|AT5G15470|AT1G64990|AT4G02500|AT3G58170|AT1G75120|AT5G62620|AT1G51590|AT2G03120|AT1G27600|AT3G06300|AT2G35610|AT3G55830|AT3G21160|AT2G17720|AT1G74800|AT5G65000|AT3G62720|AT5G16910|AT4G34580|AT1G02730|AT1G19360|AT1G78240|AT3G13870|AT5G13170|AT1G01960|AT5G47200|AT5G22740|AT3G27530|AT1G08030|AT1G59820|AT1G33430|AT2G22900|AT5G27150|AT4G36890|AT1G02720|AT2G02810|AT3G63420…
42623	2.0461e-07	1.3296e-06	51	370	1950	30472	ATPase activity, coupled	AT1G44900|AT1G10130|AT4G29900|AT2G30950|AT5G18620|AT3G53480|AT1G17840|AT5G61730|AT1G16280|AT3G10670|AT1G08840|AT5G58270|AT1G79560|AT1G70070|AT2G06990|AT1G80350|AT2G26910|AT1G50250|AT1G01040|AT5G13010|AT2G02480|AT2G46020|AT4G14790|AT5G23630|AT1G12770|AT5G42270|AT5G26742|AT3G28860|AT2G36910|AT3G09660|AT1G59820|AT4G23940|AT1G31770|AT5G64580|AT2G35340|AT5G47040|AT2G47000|AT4G11150|AT1G32490|AT3G06400…
46620	2.2567e-07	1.4645e-06	11	26	1950	30472	regulation of organ growth	AT3G59900|AT1G19270|AT2G25180|AT4G31920|AT5G03680|AT3G63530|AT1G32310|AT4G29140|AT3G16857|AT4G16110|AT2G35230
9100	2.3499e-07	1.5228e-06	23	107	1950	30472	glycoprotein metabolic process	AT2G35610|AT3G55830|AT4G21060|AT1G08660|AT3G21160|AT3G06440|AT3G04240|AT1G08030|AT4G02500|AT1G16570|AT1G74800|AT1G33430|AT1G30000|AT3G62720|AT1G67490|AT5G03080|AT5G62620|AT3G11540|AT1G51590|AT3G45040|AT5G02410|AT2G25110|AT1G27600
16246	2.416e-07	1.5635e-06	13	37	1950	30472	RNA interference	AT5G20320|AT5G23570|AT3G49500|AT1G69440|AT5G23080|AT4G20910|AT3G17185|AT1G01040|AT1G48410|AT5G13010|AT2G27100|AT2G27840|AT1G09700
31047	2.5374e-07	1.6397e-06	29	158	1950	30472	gene silencing by RNA	AT5G20320|AT5G21150|AT5G23570|AT3G05040|AT3G49500|AT1G69440|AT4G20910|AT3G17185|AT1G70070|AT3G07610|AT4G31877|AT1G32490|AT2G30280|AT4G16280|AT5G23880|AT2G13540|AT2G39175|AT5G61780|AT5G23080|AT2G46685|AT1G01040|AT1G48410|AT5G13010|AT2G27100|AT5G46845|AT5G43810|AT2G43410|AT2G27840|AT1G09700
6974	2.6199e-07	1.6907e-06	45	311	1950	30472	response to DNA damage stimulus	AT5G46210|AT4G00020|AT1G05180|AT4G31400|AT2G32950|AT1G66730|AT3G09660|AT1G16890|AT4G21100|AT4G02460|AT4G29860|AT4G09140|AT1G76710|AT1G25580|AT4G29170|AT1G04020|AT4G32551|AT5G45600|AT1G43850|AT1G78870|AT3G27060|AT4G38630|AT5G48720|AT5G14170|AT3G28730|AT1G66740|AT3G23580|AT5G21140|AT3G25100|AT2G06510|AT4G10710|AT1G65470|AT2G19520|AT5G67100|AT1G14400|AT3G12380|AT5G04560|AT1G50030|AT3G15150|AT5G64630…
71514	2.6689e-07	1.7138e-06	8	13	1950	30472	genetic imprinting	AT3G12280|AT5G04560|AT2G23380|AT5G51230|AT4G02020|AT5G49160|AT5G58230|AT3G20740
6349	2.6689e-07	1.7138e-06	8	13	1950	30472	regulation of gene expression by genetic imprinting	AT3G12280|AT5G04560|AT2G23380|AT5G51230|AT4G02020|AT5G49160|AT5G58230|AT3G20740
44448	2.6705e-07	1.7138e-06	16	56	1950	30472	cell cortex part	AT3G56640|AT5G17410|AT1G71820|AT4G02350|AT2G34680|AT4G26760|AT1G68060|AT1G21170|AT5G55230|AT3G10380|AT3G44200|AT4G27060|AT1G76850|AT3G48750|AT5G03540|AT5G28646
48545	2.6705e-07	1.7138e-06	16	56	1950	30472	response to steroid hormone stimulus	AT1G14000|AT1G34210|AT3G51550|AT1G71830|AT2G13790|AT1G48270|AT4G39400|AT2G42580|AT4G18710|AT1G74500|AT2G01950|AT2G44080|AT1G75080|AT3G46290|AT5G54380|AT4G38740
9507	2.7018e-07	1.7315e-06	340	4123	1950	30472	chloroplast	AT2G35720|AT5G17690|AT2G34630|AT5G42890|AT3G08550|AT2G41720|AT2G30950|AT5G63110|AT3G57280|AT4G35460|AT2G20585|AT3G18110|AT3G44880|AT2G27530|AT1G79560|AT1G02140|AT3G48680|AT4G14880|AT5G22800|AT2G25110|AT1G70070|AT4G31780|AT3G05970|AT1G64520|AT5G19620|AT2G40400|AT4G29350|AT5G66055|AT3G23940|AT3G04400|AT3G52280|AT1G30610|AT2G18020|AT4G14510|AT2G21660|AT3G56090|AT3G20440|AT1G51660|AT4G27060|AT4G23810…
42393	3.1106e-07	1.988e-06	15	50	1950	30472	histone binding	AT4G22140|AT1G18800|AT1G20900|AT3G01460|AT5G17690|AT3G06010|AT3G49660|AT2G28290|AT5G19310|AT1G65470|AT3G44600|AT1G74560|AT4G30200|AT2G02470|AT4G39100
10565	3.1106e-07	1.988e-06	15	50	1950	30472	regulation of cellular ketone metabolic process	AT1G08030|AT3G52430|AT5G63980|AT3G21220|AT4G03560|AT5G60410|AT1G79700|AT1G16060|AT5G57740|AT3G47860|AT1G04020|AT3G47450|AT1G20780|AT1G05850|AT1G21970
4674	3.4129e-07	2.1781e-06	93	852	1950	30472	protein serine/threonine kinase activity	AT3G02130|AT3G07980|AT3G59420|AT3G22420|AT1G73500|AT4G28650|AT3G05840|AT4G01370|AT2G01820|AT2G20300|AT3G44200|AT5G64960|AT3G12690|AT1G75640|AT5G45800|AT1G09970|AT3G01090|AT1G63700|AT5G67260|AT4G23250|AT3G49670|AT1G34210|AT5G26751|AT3G51550|AT1G10940|AT5G61480|AT4G28980|AT3G54180|AT4G28860|AT2G43790|AT2G44680|AT4G18710|AT4G08480|AT1G18390|AT3G45640|AT4G19600|AT2G01950|AT2G46700|AT1G51660|AT3G48750…
19395	3.4572e-07	2.2034e-06	13	38	1950	30472	fatty acid oxidation	AT5G42890|AT3G04460|AT5G27520|AT4G29010|AT2G35690|AT3G06810|AT4G14430|AT1G79810|AT1G72970|AT3G51840|AT3G05290|AT4G16760|AT2G26350
5834	3.552e-07	2.2607e-06	18	71	1950	30472	heterotrimeric G-protein complex	AT2G26060|AT4G29830|AT5G23730|AT3G21060|AT3G49660|AT4G11920|AT2G34260|AT1G31930|AT3G20740|AT3G22942|AT1G18080|AT4G34460|AT4G22910|AT3G18130|AT3G63420|AT5G50230|AT2G26300|AT2G46340
10187	3.57e-07	2.2659e-06	10	22	1950	30472	negative regulation of seed germination	AT3G03450|AT5G17490|AT1G16060|AT2G42620|AT2G36270|AT4G36930|AT2G01570|AT1G66350|AT1G14920|AT5G56030
51241	3.57e-07	2.2659e-06	10	22	1950	30472	negative regulation of multicellular organismal process	AT3G03450|AT5G17490|AT1G16060|AT2G42620|AT2G36270|AT4G36930|AT2G01570|AT1G66350|AT1G14920|AT5G56030
4872	3.8418e-07	2.4351e-06	24	118	1950	30472	receptor activity	AT2G18915|AT5G17020|AT1G34210|AT4G08920|AT2G17820|AT1G09570|AT1G71830|AT3G59420|AT2G13790|AT1G48270|AT5G07280|AT1G68050|AT4G39400|AT2G18790|AT2G01830|AT4G38350|AT1G27320|AT2G01950|AT1G42470|AT4G28490|AT5G35750|AT1G04400|AT4G38630|AT5G57360
8092	4.1803e-07	2.646e-06	38	246	1950	30472	cytoskeletal protein binding	AT1G80260|AT4G01710|AT3G23670|AT3G54870|AT5G18700|AT3G53180|AT1G68060|AT3G63480|AT1G31810|AT3G16630|AT1G30825|AT5G65930|AT5G54650|AT3G43210|AT2G44190|AT5G44610|AT1G01950|AT5G43900|AT5G20490|AT3G28630|AT1G80350|AT1G04160|AT3G27000|AT2G38440|AT5G56600|AT3G60740|AT4G29350|AT5G35700|AT2G19760|AT4G26760|AT5G55230|AT3G16640|AT1G18370|AT1G17580|AT4G27060|AT1G13180|AT4G14150|AT4G30160
9941	4.3865e-07	2.7727e-06	78	680	1950	30472	chloroplast envelope	AT5G22640|AT3G08630|AT1G03160|AT2G30950|AT5G63110|AT5G14220|AT5G46290|AT2G34590|AT3G57280|AT2G37860|AT4G35460|AT5G03080|AT3G46740|AT1G78630|AT5G61410|AT3G44880|AT5G53860|AT5G12470|AT5G58270|AT1G79560|AT5G58070|AT4G31780|AT5G18570|AT1G64520|AT5G22790|AT3G08640|AT2G31530|AT5G19620|AT2G40400|AT3G07430|AT5G17520|AT5G23040|AT5G54800|AT2G39730|AT3G56090|AT1G50250|AT5G35220|AT1G07420|AT4G32400|AT4G01800…
7349	4.3953e-07	2.7745e-06	7	10	1950	30472	cellularization	AT2G18390|AT1G18370|AT3G43210|AT1G50240|AT2G44190|AT5G48030|AT5G18700
16593	4.5117e-07	2.8362e-06	6	7	1950	30472	Cdc73/Paf1 complex	AT4G29830|AT2G06210|AT1G61040|AT3G22590|AT1G79730|AT5G61150
9649	4.5117e-07	2.8362e-06	6	7	1950	30472	entrainment of circadian clock	AT2G18790|AT2G40080|AT2G32950|AT3G26640|AT1G12910|AT5G57360
45931	4.5117e-07	2.8362e-06	6	7	1950	30472	positive regulation of mitotic cell cycle	AT3G15150|AT5G14250|AT5G42970|AT1G71230|AT1G22920|AT1G06230
9991	4.5176e-07	2.8362e-06	37	237	1950	30472	response to extracellular stimulus	AT5G23630|AT1G55180|AT3G02570|AT4G02380|AT3G19190|AT3G25710|AT4G02260|AT1G13300|AT4G24670|AT1G71040|AT1G53310|AT3G62770|AT1G27320|AT5G45900|AT5G05860|AT3G01090|AT1G05630|AT2G22240|AT2G02470|AT4G31877|AT3G05630|AT3G03250|AT2G14210|AT3G18290|AT5G60410|AT1G23010|AT4G34460|AT2G01830|AT1G18390|AT4G29380|AT4G03190|AT2G20610|AT3G62980|AT1G05680|AT1G54130|AT2G26890|AT5G17290
4888	4.6173e-07	2.8949e-06	17	65	1950	30472	transmembrane receptor activity	AT1G34210|AT2G17820|AT1G09570|AT1G71830|AT3G59420|AT2G13790|AT1G48270|AT5G07280|AT4G39400|AT2G18790|AT2G01830|AT4G38350|AT1G27320|AT2G01950|AT1G42470|AT4G28490|AT5G35750
9411	4.7103e-07	2.9492e-06	23	111	1950	30472	response to UV	AT1G10670|AT5G14170|AT5G23730|AT4G00730|AT3G52430|AT3G28860|AT2G36910|AT2G37040|AT1G32870|AT5G63890|AT2G19520|AT4G39400|AT2G43790|AT2G42260|AT5G05690|AT1G76710|AT3G45640|AT1G29410|AT5G11260|AT2G02760|AT2G46370|AT5G37890|AT2G26670
7154	4.962e-07	3.1026e-06	45	318	1950	30472	cell communication	AT5G23630|AT1G55180|AT4G05410|AT2G41500|AT3G49500|AT1G71820|AT4G02380|AT3G22200|AT3G19190|AT3G25710|AT1G13300|AT4G24670|AT1G71040|AT1G53310|AT3G62770|AT1G72970|AT1G27320|AT1G02900|AT1G76850|AT5G45900|AT5G05860|AT2G22240|AT2G02470|AT1G01510|AT4G15570|AT4G31877|AT3G05630|AT3G03250|AT3G56640|AT5G17520|AT4G02350|AT4G24580|AT3G18290|AT5G60410|AT1G23010|AT1G21170|AT2G01830|AT1G18390|AT3G10380|AT4G29380…
55028	5.0611e-07	3.1603e-06	9	18	1950	30472	cortical microtubule	AT1G68060|AT5G55230|AT3G44200|AT4G27060|AT3G48750|AT5G17410|AT2G34680|AT5G28646|AT4G26760
44264	5.1387e-07	3.2044e-06	49	360	1950	30472	cellular polysaccharide metabolic process	AT3G01040|AT2G36850|AT5G15470|AT3G08550|AT4G02500|AT5G49720|AT1G19300|AT4G03550|AT3G29810|AT1G63180|AT5G66460|AT4G32551|AT1G05850|AT1G27600|AT2G35610|AT5G22510|AT3G55830|AT1G64440|AT1G68765|AT5G17520|AT3G62720|AT5G16910|AT1G02730|AT3G20440|AT1G53000|AT2G32700|AT1G78240|AT3G07160|AT2G35620|AT1G10670|AT3G02230|AT1G70730|AT5G15650|AT4G02280|AT1G23190|AT2G22900|AT4G36890|AT1G02720|AT1G79500|AT4G01220…
52386	5.5662e-07	3.4663e-06	11	28	1950	30472	cell wall thickening	AT5G03280|AT4G31500|AT3G03250|AT5G17310|AT1G34350|AT1G77850|AT1G66340|AT3G07160|AT1G19300|AT4G03550|AT4G23100
9250	5.7137e-07	3.5534e-06	22	104	1950	30472	glucan biosynthetic process	AT2G35620|AT1G10670|AT3G02230|AT2G36850|AT4G04970|AT1G64440|AT5G22130|AT3G08550|AT5G48300|AT4G02500|AT5G49720|AT1G70730|AT5G15650|AT1G23190|AT3G62720|AT4G03550|AT3G29810|AT5G16910|AT1G02730|AT3G20440|AT3G07160|AT1G05850
10114	5.85e-07	3.6333e-06	17	66	1950	30472	response to red light	AT1G10470|AT5G17880|AT4G08920|AT4G31500|AT1G80340|AT1G09570|AT5G24470|AT1G32870|AT2G21650|AT2G18790|AT1G25540|AT2G40080|AT3G18780|AT5G11260|AT4G36930|AT2G46340|AT5G57360
6379	5.8757e-07	3.6444e-06	8	14	1950	30472	mRNA cleavage	AT4G04885|AT2G46685|AT4G20910|AT1G01040|AT3G04680|AT5G23880|AT5G13480|AT1G09700
9900	5.9527e-07	3.6872e-06	10	23	1950	30472	dehiscence	AT4G25640|AT1G47260|AT1G72520|AT2G02970|AT4G19180|AT5G24330|AT2G41850|AT5G13790|AT5G62000|AT1G17420
51649	6.1494e-07	3.8039e-06	75	651	1950	30472	establishment of localization in cell	AT5G22640|AT3G55620|AT1G13120|AT5G24740|AT5G42890|AT3G05040|AT3G58170|AT2G19560|AT5G07120|AT5G56450|AT3G46740|AT1G76850|AT4G38490|AT3G05290|AT4G36630|AT5G43900|AT4G24540|AT3G03110|AT2G31530|AT5G20490|AT5G27520|AT3G56640|AT1G04160|AT3G61630|AT3G25520|AT5G19820|AT1G17730|AT1G79810|AT2G21660|AT1G73030|AT1G17580|AT4G32400|AT3G13870|AT4G01800|AT2G26350|AT1G13980|AT5G47200|AT3G27530|AT3G54870|AT4G24190…
8289	6.3319e-07	3.9116e-06	48	352	1950	30472	lipid binding	AT1G17920|AT1G13120|AT2G34710|AT1G64990|AT5G42890|AT3G05120|AT3G25230|AT3G06810|AT4G39400|AT5G07120|AT3G14270|AT1G72150|AT5G13300|AT3G62770|AT4G11850|AT3G63300|AT1G05230|AT5G44610|AT3G51840|AT4G16760|AT1G61620|AT4G27630|AT2G31650|AT1G34210|AT4G00730|AT1G30490|AT1G10940|AT2G35690|AT5G60690|AT4G24580|AT1G47270|AT2G35350|AT4G12550|AT5G06140|AT1G27950|AT3G61150|AT3G43720|AT5G58440|AT5G53470|AT1G74720…
43543	6.6504e-07	4.0974e-06	12	34	1950	30472	protein amino acid acylation	AT1G16710|AT3G22942|AT3G09600|AT3G01460|AT3G54610|AT4G37580|AT5G45600|AT1G80410|AT3G12980|AT1G79000|AT2G18000|AT5G57020
6635	6.6504e-07	4.0974e-06	12	34	1950	30472	fatty acid beta-oxidation	AT4G14430|AT1G79810|AT5G42890|AT3G04460|AT5G27520|AT4G29010|AT2G35690|AT3G51840|AT3G05290|AT4G16760|AT3G06810|AT2G26350
43331	6.8091e-07	4.1729e-06	13	40	1950	30472	response to dsRNA	AT3G07610|AT5G20320|AT5G23570|AT3G49500|AT2G13540|AT1G69440|AT5G23080|AT4G20910|AT1G01040|AT5G13010|AT2G27100|AT2G27840|AT1G09700
70918	6.8091e-07	4.1729e-06	13	40	1950	30472	production of small RNA involved in gene silencing by RNA	AT3G07610|AT5G20320|AT5G23570|AT3G49500|AT2G13540|AT1G69440|AT5G23080|AT4G20910|AT1G01040|AT5G13010|AT2G27100|AT2G27840|AT1G09700
71359	6.8091e-07	4.1729e-06	13	40	1950	30472	cellular response to dsRNA	AT3G07610|AT5G20320|AT5G23570|AT3G49500|AT2G13540|AT1G69440|AT5G23080|AT4G20910|AT1G01040|AT5G13010|AT2G27100|AT2G27840|AT1G09700
31050	6.8091e-07	4.1729e-06	13	40	1950	30472	dsRNA fragmentation	AT3G07610|AT5G20320|AT5G23570|AT3G49500|AT2G13540|AT1G69440|AT5G23080|AT4G20910|AT1G01040|AT5G13010|AT2G27100|AT2G27840|AT1G09700
44093	6.9097e-07	4.2234e-06	18	74	1950	30472	positive regulation of molecular function	AT3G29035|AT4G29810|AT1G09000|AT5G63770|AT4G11920|AT4G21540|AT3G60740|AT3G21220|AT1G48270|AT4G24580|AT5G39610|AT3G45640|AT4G19600|AT4G22910|AT2G18290|AT1G51660|AT4G30340|AT3G48360
3712	6.9097e-07	4.2234e-06	18	74	1950	30472	transcription cofactor activity	AT1G16710|AT1G06040|AT4G00850|AT5G61780|AT5G24590|AT5G63160|AT1G25540|AT1G19180|AT1G01160|AT5G28640|AT2G32700|AT1G04020|AT1G43850|AT3G12980|AT1G79000|AT1G02680|AT1G01510|AT3G48360
71322	7.1969e-07	4.3931e-06	15	53	1950	30472	cellular response to carbohydrate stimulus	AT5G46210|AT1G09100|AT3G52430|AT1G66340|AT2G36270|AT2G01830|AT5G03280|AT1G27320|AT4G15900|AT5G64930|AT3G11220|AT3G01090|AT1G05630|AT3G48360|AT3G44290
9309	7.627e-07	4.6495e-06	37	242	1950	30472	amine biosynthetic process	AT2G39800|AT4G31500|AT2G16500|AT1G56430|AT3G06350|AT5G19530|AT3G59760|AT5G63890|AT1G48270|AT3G53180|AT1G25220|AT5G10330|AT3G61440|AT4G34710|AT2G26300|AT4G14880|AT1G80600|AT2G43000|AT2G28880|AT3G55610|AT1G15110|AT2G37250|AT1G18640|AT3G23940|AT5G08170|AT5G37600|AT1G29410|AT1G48850|AT2G26830|AT4G38800|AT2G43090|AT5G05730|AT4G34840|AT5G56080|AT2G43750|AT4G34200|AT2G22250
9646	8.4483e-07	5.13e-06	11	29	1950	30472	response to absence of light	AT2G45430|AT1G64520|AT3G61140|AT2G45400|AT4G08920|AT2G32950|AT4G02380|AT5G37770|AT4G01800|AT2G46990|AT1G04400
5838	8.4483e-07	5.13e-06	11	29	1950	30472	proteasome regulatory particle	AT3G05530|AT1G64520|AT1G09100|AT4G29040|AT3G11270|AT5G05780|AT5G64760|AT1G20200|AT2G20140|AT5G09900|AT4G38630
22624	8.4483e-07	5.13e-06	11	29	1950	30472	proteasome accessory complex	AT3G05530|AT1G64520|AT1G09100|AT4G29040|AT3G11270|AT5G05780|AT5G64760|AT1G20200|AT2G20140|AT5G09900|AT4G38630
6006	8.5116e-07	5.1616e-06	24	123	1950	30472	glucose metabolic process	AT3G04120|AT5G52920|AT5G24400|AT1G34430|AT3G03250|AT5G48300|AT5G17310|AT1G09780|AT1G70730|AT4G26270|AT4G04040|AT2G34590|AT1G23190|AT3G22960|AT1G16300|AT3G20440|AT5G61410|AT1G50460|AT1G79530|AT2G21170|AT3G08590|AT5G52560|AT1G74030|AT2G01290
9624	8.5508e-07	5.1786e-06	18	75	1950	30472	response to nematode	AT2G36400|AT2G36910|AT5G17520|AT2G38120|AT2G39350|AT5G54800|AT5G53550|AT2G22840|AT5G61410|AT3G61650|AT2G32700|AT5G05620|AT3G03090|AT5G06720|AT4G32551|AT1G43850|AT2G21050|AT2G10606
71555	9.015e-07	5.4526e-06	62	509	1950	30472	cell wall organization	AT3G01040|AT2G36850|AT5G15470|AT3G57200|AT4G31500|AT3G08550|AT5G49720|AT5G66300|AT4G28370|AT1G19300|AT3G57280|AT4G03550|AT3G29810|AT1G63180|AT3G09090|AT5G03280|AT1G75120|AT4G32551|AT1G27600|AT5G55480|AT2G35610|AT3G55830|AT1G12560|AT1G12040|AT3G56960|AT1G66340|AT5G16910|AT5G11630|AT1G02730|AT2G18060|AT4G36160|AT1G19360|AT1G53000|AT2G32700|AT2G41850|AT2G41210|AT3G07160|AT1G62700|AT1G13980|AT2G35620…
5881	9.0677e-07	5.4702e-06	9	19	1950	30472	cytoplasmic microtubule	AT1G68060|AT5G55230|AT3G44200|AT4G27060|AT3G48750|AT5G17410|AT2G34680|AT5G28646|AT4G26760
8083	9.0677e-07	5.4702e-06	9	19	1950	30472	growth factor activity	AT2G22860|AT3G49780|AT1G13590|AT5G51451|AT2G04025|AT5G65870|AT3G44735|AT5G60810|AT1G13620
10639	9.3869e-07	5.6553e-06	13	41	1950	30472	negative regulation of organelle organization	AT4G22140|AT1G79280|AT3G57860|AT5G56600|AT4G29350|AT2G19760|AT2G42260|AT5G04470|AT1G04020|AT3G48430|AT5G44610|AT4G30160|AT4G39100
9062	9.5307e-07	5.7345e-06	12	35	1950	30472	fatty acid catabolic process	AT4G14430|AT1G79810|AT5G42890|AT3G04460|AT5G27520|AT4G29010|AT2G35690|AT3G51840|AT3G05290|AT4G16760|AT3G06810|AT2G26350
8276	9.5838e-07	5.759e-06	16	61	1950	30472	protein methyltransferase activity	AT2G31650|AT4G15180|AT5G23320|AT5G24330|AT5G49020|AT4G02020|AT3G06930|AT1G76710|AT1G51450|AT5G09790|AT1G77300|AT5G42400|AT2G23380|AT3G48330|AT5G08335|AT1G04870
19897	1.0538e-06	6.3242e-06	18	76	1950	30472	extrinsic to plasma membrane	AT2G26060|AT4G29830|AT5G23730|AT3G21060|AT3G49660|AT4G11920|AT2G34260|AT1G31930|AT3G20740|AT3G22942|AT1G18080|AT4G34460|AT4G22910|AT3G18130|AT3G63420|AT5G50230|AT2G26300|AT2G46340
6730	1.0671e-06	6.3682e-06	49	369	1950	30472	one-carbon metabolic process	AT5G41480|AT3G49660|AT3G24440|AT5G49160|AT3G06930|AT4G10760|AT5G05980|AT1G77300|AT2G21070|AT1G20330|AT5G08335|AT5G39550|AT4G29830|AT2G30280|AT2G31650|AT5G23320|AT5G24330|AT5G55250|AT2G22475|AT1G69770|AT4G13940|AT3G10160|AT5G09790|AT2G30920|AT1G79730|AT1G78240|AT3G48430|AT4G30860|AT1G04870|AT1G11680|AT3G01460|AT5G20320|AT5G49020|AT3G54150|AT3G20740|AT1G76710|AT4G20910|AT1G51450|AT1G62830|AT3G07610…
10071	1.068e-06	6.3682e-06	5	5	1950	30472	root meristem specification	AT1G11130|AT2G20000|AT3G07780|AT3G13300|AT5G48160
35198	1.068e-06	6.3682e-06	5	5	1950	30472	miRNA binding	AT4G30080|AT1G48410|AT5G43810|AT2G28350|AT1G09700
80024	1.068e-06	6.3682e-06	5	5	1950	30472	indolebutyric acid metabolic process	AT4G14430|AT5G27520|AT1G05680|AT4G05530|AT3G05290
6513	1.068e-06	6.3682e-06	5	5	1950	30472	protein monoubiquitination	AT1G79810|AT1G55250|AT3G04460|AT2G44950|AT2G26350
46486	1.106e-06	6.5861e-06	27	151	1950	30472	glycerolipid metabolic process	AT2G32010|AT1G55180|AT1G60490|AT1G34120|AT5G03080|AT5G61730|AT4G39800|AT4G11850|AT2G21170|AT1G05630|AT1G06520|AT5G64070|AT5G22130|AT1G15110|AT3G57650|AT3G56960|AT1G05470|AT3G54320|AT5G14850|AT2G19450|AT5G09350|AT2G26830|AT4G18010|AT2G41210|AT4G33950|AT3G15730|AT4G30580
9704	1.1414e-06	6.7798e-06	7	11	1950	30472	de-etiolation	AT1G10370|AT4G37470|AT3G08010|AT1G09530|AT5G23040|AT2G04030|AT4G38740
10389	1.1414e-06	6.7798e-06	7	11	1950	30472	regulation of G2/M transition of mitotic cell cycle	AT1G80370|AT5G14250|AT5G42970|AT1G15570|AT1G71230|AT1G22920|AT2G44950
17038	1.1539e-06	6.8452e-06	24	125	1950	30472	protein import	AT5G22640|AT4G27950|AT4G24540|AT1G79280|AT5G17020|AT3G03110|AT3G04460|AT4G00026|AT3G61630|AT5G19820|AT4G23750|AT5G47040|AT1G55900|AT2G46310|AT1G79810|AT3G46740|AT3G46560|AT5G41950|AT4G01800|AT1G21650|AT2G26350|AT2G04030|AT5G53290|AT4G11140
43647	1.1881e-06	7.0296e-06	8	15	1950	30472	inositol phosphate metabolic process	AT4G39800|AT5G61760|AT1G34120|AT1G05470|AT4G18010|AT2G22240|AT5G42810|AT4G33770
7140	1.1881e-06	7.0296e-06	8	15	1950	30472	male meiosis	AT5G57880|AT5G48720|AT1G75950|AT2G06510|AT3G09660|AT1G06660|AT1G77390|AT1G64625
31347	1.1941e-06	7.0564e-06	30	179	1950	30472	regulation of defense response	AT4G00020|AT5G47220|AT5G23570|AT3G07780|AT3G52430|AT3G02150|AT4G29140|AT1G17980|AT4G03550|AT1G49040|AT2G18790|AT1G25540|AT5G03280|AT4G15415|AT1G77300|AT2G46370|AT2G25110|AT1G20900|AT3G27960|AT5G24590|AT2G37630|AT4G02590|AT2G43790|AT5G60410|AT1G19180|AT4G08480|AT3G47620|AT4G15900|AT4G23810|AT1G22920
5976	1.2444e-06	7.3441e-06	55	436	1950	30472	polysaccharide metabolic process	AT3G01040|AT2G36850|AT5G15470|AT3G08550|AT4G02500|AT5G49720|AT4G28370|AT1G19300|AT4G03550|AT3G29810|AT1G63180|AT5G66460|AT5G49360|AT4G32551|AT1G05850|AT1G27600|AT5G55480|AT3G54420|AT2G35610|AT5G22510|AT3G55830|AT1G64440|AT1G68765|AT5G17520|AT3G62720|AT5G16910|AT1G02730|AT3G20440|AT1G53000|AT2G32700|AT1G78240|AT3G07160|AT2G35620|AT1G10670|AT3G02230|AT1G70730|AT5G15650|AT4G02280|AT1G23190|AT2G22900…
34968	1.2567e-06	7.398e-06	11	30	1950	30472	histone lysine methylation	AT2G22475|AT4G29830|AT2G31650|AT5G11530|AT1G69770|AT5G09790|AT3G22590|AT1G77300|AT5G24330|AT5G42400|AT1G62830
6020	1.2567e-06	7.398e-06	11	30	1950	30472	inositol metabolic process	AT4G39800|AT5G61760|AT1G34120|AT1G05470|AT4G18010|AT3G22200|AT1G05630|AT2G22240|AT5G42810|AT3G01640|AT4G33770
51129	1.2799e-06	7.5155e-06	13	42	1950	30472	negative regulation of cellular component organization	AT4G22140|AT1G79280|AT3G57860|AT5G56600|AT4G29350|AT2G19760|AT2G42260|AT5G04470|AT1G04020|AT3G48430|AT5G44610|AT4G30160|AT4G39100
4693	1.2799e-06	7.5155e-06	13	42	1950	30472	cyclin-dependent protein kinase activity	AT5G67260|AT5G45190|AT5G63370|AT4G28980|AT3G50070|AT2G31270|AT3G54180|AT5G10440|AT4G19600|AT5G64960|AT3G48750|AT5G10270|AT3G54710
10638	1.3464e-06	7.8956e-06	12	36	1950	30472	positive regulation of organelle organization	AT5G55230|AT3G16640|AT1G80260|AT2G18290|AT3G24440|AT1G77300|AT2G38440|AT1G04020|AT5G17410|AT4G22970|AT5G39550|AT5G55390
43413	1.3801e-06	8.0625e-06	21	101	1950	30472	macromolecule glycosylation	AT2G35610|AT3G55830|AT4G21060|AT1G08660|AT3G21160|AT3G06440|AT3G04240|AT4G02500|AT1G16570|AT1G74800|AT1G33430|AT1G30000|AT3G62720|AT1G67490|AT5G03080|AT5G62620|AT3G11540|AT1G51590|AT3G45040|AT5G02410|AT1G27600
70085	1.3801e-06	8.0625e-06	21	101	1950	30472	glycosylation	AT2G35610|AT3G55830|AT4G21060|AT1G08660|AT3G21160|AT3G06440|AT3G04240|AT4G02500|AT1G16570|AT1G74800|AT1G33430|AT1G30000|AT3G62720|AT1G67490|AT5G03080|AT5G62620|AT3G11540|AT1G51590|AT3G45040|AT5G02410|AT1G27600
6486	1.3801e-06	8.0625e-06	21	101	1950	30472	protein amino acid glycosylation	AT2G35610|AT3G55830|AT4G21060|AT1G08660|AT3G21160|AT3G06440|AT3G04240|AT4G02500|AT1G16570|AT1G74800|AT1G33430|AT1G30000|AT3G62720|AT1G67490|AT5G03080|AT5G62620|AT3G11540|AT1G51590|AT3G45040|AT5G02410|AT1G27600
32506	1.5108e-06	8.8153e-06	10	25	1950	30472	cytokinetic process	AT2G22870|AT3G23670|AT3G61650|AT3G19770|AT5G05620|AT5G03540|AT5G18700|AT4G14150|AT5G05970|AT5G42080
33036	1.5532e-06	9.0486e-06	97	931	1950	30472	macromolecule localization	AT5G22640|AT5G42890|AT3G05040|AT4G31820|AT3G57280|AT5G07120|AT5G61730|AT5G03280|AT3G10110|AT5G40480|AT2G31530|AT3G54220|AT4G29350|AT5G58440|AT2G21660|AT4G16370|AT1G01960|AT5G17290|AT5G47200|AT3G27530|AT5G17310|AT4G24190|AT1G55540|AT5G47040|AT2G46310|AT3G46560|AT2G04030|AT5G17020|AT5G51430|AT1G34350|AT5G56600|AT2G13540|AT2G19760|AT4G12550|AT5G06140|AT1G27950|AT1G72560|AT3G43720|AT4G14455|AT3G10380…
51193	1.5547e-06	9.0486e-06	9	20	1950	30472	regulation of cofactor metabolic process	AT2G25180|AT1G27320|AT4G31920|AT5G35750|AT1G56200|AT5G58270|AT3G16857|AT1G20780|AT3G21200
46907	1.5714e-06	9.1344e-06	66	563	1950	30472	intracellular transport	AT5G22640|AT3G55620|AT1G13120|AT5G24740|AT5G42890|AT3G05040|AT3G58170|AT2G19560|AT5G07120|AT5G56450|AT3G46740|AT1G76850|AT4G38490|AT3G05290|AT4G36630|AT5G43900|AT4G24540|AT3G03110|AT5G20490|AT5G27520|AT1G04160|AT3G61630|AT3G25520|AT5G19820|AT1G17730|AT1G79810|AT2G21660|AT1G73030|AT1G17580|AT4G32400|AT3G13870|AT4G01800|AT2G26350|AT1G13980|AT5G47200|AT3G27530|AT3G54870|AT4G00026|AT1G59820|AT2G30330…
10382	1.6713e-06	9.7028e-06	20	94	1950	30472	cellular cell wall macromolecule metabolic process	AT3G01040|AT2G35610|AT3G55830|AT4G21060|AT5G15470|AT4G02500|AT2G22900|AT1G19300|AT3G62720|AT4G28320|AT3G29810|AT5G66460|AT1G14720|AT4G36890|AT2G01850|AT2G32700|AT4G32551|AT2G25110|AT1G27600|AT1G74380
10076	1.7061e-06	9.8308e-06	6	8	1950	30472	maintenance of floral meristem identity	AT4G24540|AT2G22540|AT5G02030|AT1G03770|AT2G27990|AT5G44280
30307	1.7061e-06	9.8308e-06	6	8	1950	30472	positive regulation of cell growth	AT2G19690|AT5G24630|AT1G50030|AT5G47390|AT5G63980|AT4G32551
48317	1.7061e-06	9.8308e-06	6	8	1950	30472	seed morphogenesis	AT5G61730|AT1G19270|AT1G52880|AT5G54650|AT1G01040|AT3G15510
48442	1.7061e-06	9.8308e-06	6	8	1950	30472	sepal development	AT3G44600|AT5G03680|AT5G46845|AT2G39175|AT2G28350|AT2G22370
48464	1.7061e-06	9.8308e-06	6	8	1950	30472	flower calyx development	AT3G44600|AT5G03680|AT5G46845|AT2G39175|AT2G28350|AT2G22370
48759	1.7061e-06	9.8308e-06	6	8	1950	30472	vessel member cell differentiation	AT2G18060|AT1G12260|AT4G36160|AT5G19530|AT5G66300|AT1G62700
9788	1.8767e-06	1.08e-05	12	37	1950	30472	negative regulation of abscisic acid mediated signaling pathway	AT4G34460|AT5G11310|AT2G25170|AT5G23320|AT3G51550|AT1G07430|AT5G08335|AT2G26300|AT1G01720|AT5G59220|AT1G48270|AT5G10720
375	2.1295e-06	1.2225e-05	25	138	1950	30472	RNA splicing, via transesterification reactions	AT3G23070|AT4G03430|AT5G16780|AT3G55220|AT2G41500|AT3G55200|AT5G63370|AT1G60170|AT2G35340|AT5G62640|AT1G77180|AT1G70070|AT1G32490|AT5G27720|AT1G09230|AT1G30010|AT2G13540|AT2G21660|AT1G27650|AT4G15900|AT5G13010|AT4G31770|AT5G42820|AT2G43410|AT4G31010
377	2.1295e-06	1.2225e-05	25	138	1950	30472	RNA splicing, via transesterification reactions with bulged adenosine as nucleophile	AT3G23070|AT4G03430|AT5G16780|AT3G55220|AT2G41500|AT3G55200|AT5G63370|AT1G60170|AT2G35340|AT5G62640|AT1G77180|AT1G70070|AT1G32490|AT5G27720|AT1G09230|AT1G30010|AT2G13540|AT2G21660|AT1G27650|AT4G15900|AT5G13010|AT4G31770|AT5G42820|AT2G43410|AT4G31010
5615	2.2733e-06	1.3034e-05	21	104	1950	30472	extracellular space	AT1G63245|AT3G28455|AT1G68765|AT3G24770|AT1G68795|AT1G73965|AT1G70895|AT1G71696|AT1G13620|AT2G01505|AT5G64667|AT1G49005|AT3G63440|AT3G18715|AT5G51451|AT2G04025|AT1G05065|AT2G34925|AT5G50260|AT4G13195|AT5G60810
9692	2.314e-06	1.3202e-05	10	26	1950	30472	ethylene metabolic process	AT4G26200|AT3G15010|AT4G37770|AT2G41060|AT1G01480|AT3G56860|AT1G05010|AT1G31340|AT1G73500|AT4G11280
9693	2.314e-06	1.3202e-05	10	26	1950	30472	ethylene biosynthetic process	AT4G26200|AT3G15010|AT4G37770|AT2G41060|AT1G01480|AT3G56860|AT1G05010|AT1G31340|AT1G73500|AT4G11280
2237	2.314e-06	1.3202e-05	10	26	1950	30472	response to molecule of bacterial origin	AT5G03280|AT4G03190|AT3G05010|AT5G18520|AT3G62980|AT1G66340|AT1G12820|AT5G24590|AT3G26810|AT5G10720
31122	2.314e-06	1.3202e-05	10	26	1950	30472	cytoplasmic microtubule organization	AT5G08120|AT5G55230|AT1G80260|AT1G80350|AT3G44200|AT3G61650|AT5G49720|AT5G05620|AT5G44610|AT4G01370
45814	2.5282e-06	1.4406e-05	15	58	1950	30472	negative regulation of gene expression, epigenetic	AT3G07610|AT4G22140|AT2G30280|AT5G17690|AT4G16280|AT3G54560|AT3G24440|AT1G60170|AT5G44280|AT1G69770|AT4G13940|AT3G17185|AT2G43410|AT1G03770|AT4G39100
30981	2.5658e-06	1.4585e-05	9	21	1950	30472	cortical microtubule cytoskeleton	AT1G68060|AT5G55230|AT3G44200|AT4G27060|AT3G48750|AT5G17410|AT2G34680|AT5G28646|AT4G26760
7186	2.5658e-06	1.4585e-05	9	21	1950	30472	G-protein coupled receptor protein signaling pathway	AT3G22942|AT3G49660|AT3G63420|AT5G63770|AT4G30340|AT4G21540|AT2G26300|AT1G31930|AT1G48270
9835	2.5871e-06	1.4616e-05	7	12	1950	30472	ripening	AT4G26200|AT5G65380|AT4G37770|AT1G47530|AT1G01480|AT1G05010|AT4G11280
60321	2.5871e-06	1.4616e-05	7	12	1950	30472	acceptance of pollen	AT1G21170|AT3G10380|AT4G05410|AT1G76850|AT3G56640|AT1G71820|AT4G02350
45793	2.5871e-06	1.4616e-05	7	12	1950	30472	positive regulation of cell size	AT1G10670|AT2G19690|AT5G24630|AT1G50030|AT5G47390|AT5G63980|AT4G32551
5677	2.5871e-06	1.4616e-05	7	12	1950	30472	chromatin silencing complex	AT4G22140|AT3G24440|AT4G30200|AT4G02020|AT4G39100|AT5G58230|AT3G20740
5680	2.5871e-06	1.4616e-05	7	12	1950	30472	anaphase-promoting complex	AT2G20000|AT4G05410|AT2G18290|AT5G05560|AT1G73177|AT2G04660|AT4G21530
1727	2.6348e-06	1.4867e-05	11	32	1950	30472	lipid kinase activity	AT5G64070|AT3G14270|AT1G60490|AT5G09350|AT1G50030|AT3G56960|AT1G77740|AT2G41210|AT4G21540|AT2G26420|AT4G33240
60589	2.8608e-06	1.6123e-05	19	89	1950	30472	nucleoside-triphosphatase regulator activity	AT1G13980|AT5G64070|AT3G07880|AT4G05330|AT3G60740|AT5G17710|AT4G24580|AT4G38430|AT4G35560|AT5G13300|AT2G46710|AT1G52240|AT5G54310|AT3G19770|AT2G26300|AT3G15730|AT4G16340|AT1G01960|AT5G43900
10383	3.1326e-06	1.7634e-05	21	106	1950	30472	cell wall polysaccharide metabolic process	AT3G01040|AT2G35610|AT3G55830|AT5G15470|AT4G02500|AT2G22900|AT1G19300|AT4G26690|AT3G62720|AT4G28320|AT3G29810|AT5G66460|AT1G14720|AT5G49360|AT4G36890|AT2G01850|AT2G32700|AT4G32551|AT1G27600|AT5G55480|AT1G74380
5996	3.3559e-06	1.8867e-05	34	227	1950	30472	monosaccharide metabolic process	AT3G02570|AT3G02230|AT5G24400|AT5G17310|AT1G09780|AT1G70730|AT5G15650|AT4G26270|AT4G04040|AT2G34590|AT1G23190|AT3G22960|AT1G63180|AT1G79500|AT5G61410|AT1G50460|AT2G21170|AT1G74030|AT3G04120|AT5G52920|AT1G64440|AT1G34430|AT3G03250|AT5G48300|AT1G16340|AT1G16300|AT4G14850|AT1G53500|AT3G20440|AT1G53000|AT1G79530|AT3G08590|AT5G52560|AT2G01290
30695	3.4076e-06	1.9135e-05	18	82	1950	30472	GTPase regulator activity	AT1G13980|AT5G64070|AT3G07880|AT4G05330|AT3G60740|AT4G24580|AT4G38430|AT4G35560|AT5G13300|AT2G46710|AT1G52240|AT5G54310|AT3G19770|AT2G26300|AT3G15730|AT4G16340|AT1G01960|AT5G43900
52543	3.4642e-06	1.9405e-05	10	27	1950	30472	callose deposition in cell wall	AT5G03280|AT4G31500|AT3G03250|AT5G17310|AT1G34350|AT1G77850|AT1G66340|AT3G07160|AT4G03550|AT4G23100
30422	3.4642e-06	1.9405e-05	10	27	1950	30472	production of siRNA involved in RNA interference	AT5G20320|AT4G20910|AT1G01040|AT5G23570|AT2G27100|AT3G49500|AT2G27840|AT1G69440|AT1G09700|AT5G23080
43254	3.7237e-06	2.0834e-05	11	33	1950	30472	regulation of protein complex assembly	AT3G05530|AT5G55230|AT1G09100|AT4G29040|AT5G13010|AT5G56600|AT5G44610|AT4G29350|AT4G30160|AT2G19760|AT2G20140
45927	3.9967e-06	2.2307e-05	8	17	1950	30472	positive regulation of growth	AT3G59900|AT2G19690|AT5G24630|AT1G50030|AT5G47390|AT5G63980|AT4G32551|AT5G07290
90056	3.9967e-06	2.2307e-05	8	17	1950	30472	regulation of chlorophyll metabolic process	AT2G25180|AT1G27320|AT4G31920|AT5G35750|AT1G56200|AT5G58270|AT3G16857|AT1G20780
10948	4.0949e-06	2.28e-05	9	22	1950	30472	negative regulation of cell cycle process	AT2G42260|AT1G79280|AT3G57860|AT3G15150|AT2G18290|AT5G04470|AT1G33240|AT1G20330|AT2G34780
30863	4.0949e-06	2.28e-05	9	22	1950	30472	cortical cytoskeleton	AT1G68060|AT5G55230|AT3G44200|AT4G27060|AT3G48750|AT5G17410|AT2G34680|AT5G28646|AT4G26760
5543	4.1516e-06	2.3088e-05	24	134	1950	30472	phospholipid binding	AT1G13120|AT2G31650|AT3G25230|AT1G10940|AT4G24580|AT1G47270|AT2G35350|AT5G06140|AT5G07120|AT3G14270|AT5G58440|AT5G53470|AT5G13300|AT3G62770|AT1G74720|AT1G53320|AT4G11850|AT2G46920|AT3G63300|AT1G60940|AT5G44610|AT1G61620|AT3G15730|AT4G33650
4672	4.4284e-06	2.4598e-05	107	1079	1950	30472	protein kinase activity	AT3G07980|AT4G08920|AT1G73500|AT4G28650|AT3G05840|AT2G18790|AT2G01820|AT1G27320|AT5G64960|AT1G75640|AT5G45800|AT1G09970|AT3G01090|AT1G63700|AT5G67260|AT4G23250|AT3G49670|AT1G09570|AT3G54180|AT2G44680|AT2G01830|AT4G18710|AT4G08480|AT2G01950|AT1G51660|AT3G53810|AT2G46340|AT4G20270|AT2G28250|AT1G09000|AT2G13790|AT4G08500|AT5G63370|AT3G50070|AT1G69270|AT1G75820|AT3G19980|AT5G65710|AT3G54710|AT4G00330…
43085	4.5333e-06	2.5151e-05	16	68	1950	30472	positive regulation of catalytic activity	AT4G29810|AT1G09000|AT5G63770|AT4G11920|AT4G21540|AT3G60740|AT3G21220|AT1G48270|AT4G24580|AT3G45640|AT4G19600|AT4G22910|AT2G18290|AT1G51660|AT4G30340|AT3G48360
6073	4.7755e-06	2.6463e-05	28	172	1950	30472	cellular glucan metabolic process	AT2G35620|AT1G10670|AT3G02230|AT2G36850|AT3G08550|AT4G02500|AT5G49720|AT1G70730|AT5G15650|AT4G02280|AT1G23190|AT4G03550|AT3G29810|AT1G05850|AT5G22510|AT4G04970|AT1G64440|AT5G22130|AT5G48300|AT5G17520|AT3G62720|AT1G14720|AT5G16910|AT1G02730|AT2G01850|AT3G20440|AT3G07160|AT1G74380
10077	4.839e-06	2.6687e-05	6	9	1950	30472	maintenance of inflorescence meristem identity	AT4G24540|AT5G02030|AT3G07050|AT1G03770|AT2G27990|AT5G44280
43044	4.839e-06	2.6687e-05	6	9	1950	30472	ATP-dependent chromatin remodeling	AT3G06400|AT2G36740|AT2G28290|AT5G37055|AT5G18620|AT2G46020
31595	4.839e-06	2.6687e-05	6	9	1950	30472	nuclear proteasome complex	AT3G05530|AT1G09100|AT4G29040|AT5G64760|AT2G20140|AT5G09900
48448	4.839e-06	2.6687e-05	6	9	1950	30472	stamen morphogenesis	AT4G39400|AT5G05690|AT3G02000|AT5G53400|AT5G07280|AT4G38630
44427	4.923e-06	2.7118e-05	35	241	1950	30472	chromosomal part	AT1G44900|AT3G01460|AT5G17690|AT4G09140|AT1G76710|AT5G55300|AT5G37630|AT5G37055|AT5G39550|AT4G39100|AT4G22140|AT1G08260|AT1G56260|AT3G28730|AT4G16280|AT5G21140|AT3G25100|AT3G54560|AT5G27740|AT2G06510|AT5G50320|AT4G10710|AT3G59550|AT5G67100|AT1G21690|AT1G26840|AT3G12380|AT3G15150|AT4G15900|AT1G18450|AT5G05970|AT2G43410|AT4G30860|AT2G02480|AT1G19080
19751	4.9963e-06	2.7489e-05	15	61	1950	30472	polyol metabolic process	AT1G34120|AT1G05470|AT4G26690|AT3G22200|AT3G01640|AT2G19450|AT4G39800|AT5G61760|AT4G18010|AT2G21170|AT1G05630|AT2G22240|AT5G42810|AT5G55480|AT4G33770
43450	5.0795e-06	2.788e-05	10	28	1950	30472	alkene biosynthetic process	AT4G26200|AT3G15010|AT4G37770|AT2G41060|AT1G01480|AT3G56860|AT1G05010|AT1G31340|AT1G73500|AT4G11280
4176	5.0795e-06	2.788e-05	10	28	1950	30472	ATP-dependent peptidase activity	AT3G04340|AT5G42270|AT1G50250|AT2G30950|AT1G06430|AT3G16290|AT4G23940|AT1G79560|AT5G64580|AT5G47040
8757	5.2149e-06	2.8556e-05	26	154	1950	30472	S-adenosylmethionine-dependent methyltransferase activity	AT4G15180|AT5G49020|AT3G54150|AT4G02020|AT5G49160|AT3G06930|AT1G76710|AT1G51450|AT4G10760|AT1G77300|AT1G20330|AT5G08335|AT2G31650|AT5G23320|AT5G24330|AT4G09980|AT5G55250|AT5G13710|AT1G69770|AT5G09790|AT2G30920|AT5G42400|AT1G78240|AT2G23380|AT3G48330|AT1G04870
42054	5.2213e-06	2.8556e-05	13	47	1950	30472	histone methyltransferase activity	AT2G31650|AT4G15180|AT5G24330|AT5G49020|AT4G02020|AT3G06930|AT1G76710|AT1G51450|AT5G09790|AT1G77300|AT5G42400|AT2G23380|AT1G04870
9851	5.2213e-06	2.8556e-05	13	47	1950	30472	auxin biosynthetic process	AT4G31500|AT3G54430|AT5G66350|AT4G24670|AT2G18120|AT1G75520|AT1G25220|AT4G36260|AT1G19790|AT5G12330|AT2G20610|AT1G70560|AT5G05730
9832	5.2468e-06	2.8629e-05	22	118	1950	30472	plant-type cell wall biogenesis	AT3G01040|AT2G35610|AT3G02230|AT1G33280|AT1G64440|AT5G15470|AT5G22130|AT1G80350|AT3G08550|AT5G15650|AT5G42080|AT3G57280|AT3G29810|AT5G16910|AT1G68060|AT1G02730|AT4G36890|AT1G02720|AT3G13870|AT1G79580|AT1G27600|AT4G11150
35194	5.2468e-06	2.8629e-05	22	118	1950	30472	posttranscriptional gene silencing by RNA	AT4G31877|AT1G32490|AT5G20320|AT5G23570|AT3G05040|AT5G23880|AT3G49500|AT2G13540|AT2G39175|AT5G61780|AT1G69440|AT5G23080|AT2G46685|AT4G20910|AT3G17185|AT1G01040|AT1G48410|AT5G13010|AT2G27100|AT5G46845|AT2G27840|AT1G09700
10092	5.2941e-06	2.8819e-05	7	13	1950	30472	specification of organ identity	AT5G64390|AT2G06990|AT4G20910|AT2G31650|AT4G37180|AT4G36920|AT1G22920
51445	5.2941e-06	2.8819e-05	7	13	1950	30472	regulation of meiotic cell cycle	AT3G57860|AT1G25580|AT5G61960|AT5G22220|AT3G48750|AT1G77390|AT5G07290
30529	5.4581e-06	2.9676e-05	92	897	1950	30472	ribonucleoprotein complex	AT3G23070|AT3G55620|AT3G11964|AT3G52590|AT4G03430|AT3G09840|AT5G21150|AT4G05410|AT5G23570|AT4G30930|AT1G17560|AT1G23290|AT1G69440|AT4G03110|AT1G43170|AT1G03910|AT1G78630|AT1G17690|AT2G27530|AT3G13300|AT1G02780|AT1G77180|AT5G57020|AT5G53180|AT1G70070|AT3G55510|AT4G01560|AT5G27720|AT5G16750|AT3G25520|AT1G67030|AT3G04400|AT3G57290|AT2G18020|AT5G37600|AT2G17250|AT4G14510|AT1G01120|AT3G63210|AT1G01040…
32259	5.7521e-06	3.1238e-05	44	337	1950	30472	methylation	AT1G11680|AT3G01460|AT5G20320|AT3G49660|AT3G24440|AT5G49020|AT3G54150|AT5G49160|AT3G20740|AT3G06930|AT1G76710|AT4G20910|AT1G51450|AT4G10760|AT1G77300|AT2G21070|AT1G20330|AT5G08335|AT5G39550|AT1G62830|AT3G07610|AT4G29830|AT2G30280|AT2G31650|AT2G06210|AT3G22590|AT5G23320|AT5G24330|AT4G09980|AT5G55250|AT2G22475|AT5G13710|AT5G11530|AT1G69770|AT5G04560|AT5G09790|AT2G30920|AT4G20400|AT1G79730|AT5G42400…
5802	5.8204e-06	3.1572e-05	36	253	1950	30472	trans-Golgi network	AT1G13980|AT1G10130|AT3G08550|AT1G08030|AT4G02500|AT5G49720|AT1G59820|AT3G54150|AT2G22900|AT1G30000|AT4G36890|AT3G15380|AT5G54310|AT1G43130|AT1G51590|AT1G01510|AT3G06300|AT5G45550|AT2G35610|AT3G55830|AT1G08660|AT3G07330|AT3G21160|AT1G74800|AT3G62720|AT5G16910|AT2G43790|AT5G13710|AT5G04480|AT1G19360|AT1G78240|AT5G41950|AT2G43750|AT1G01960|AT1G74380|AT2G26890
19318	5.9964e-06	3.2489e-05	28	174	1950	30472	hexose metabolic process	AT3G02570|AT5G24400|AT5G17310|AT1G09780|AT1G70730|AT4G26270|AT4G04040|AT2G34590|AT1G23190|AT3G22960|AT1G63180|AT5G61410|AT1G50460|AT2G21170|AT1G74030|AT3G04120|AT5G52920|AT1G64440|AT1G34430|AT3G03250|AT5G48300|AT1G16300|AT1G53500|AT3G20440|AT1G79530|AT3G08590|AT5G52560|AT2G01290
912	6.0672e-06	3.2643e-05	5	6	1950	30472	assembly of actomyosin apparatus involved in cell cycle cytokinesis	AT3G23670|AT3G61650|AT5G05620|AT5G18700|AT4G14150
914	6.0672e-06	3.2643e-05	5	6	1950	30472	phragmoplast assembly	AT3G23670|AT3G61650|AT5G05620|AT5G18700|AT4G14150
10011	6.0672e-06	3.2643e-05	5	6	1950	30472	auxin binding	AT4G03190|AT3G62980|AT2G38120|AT1G12820|AT3G26810
10328	6.0672e-06	3.2643e-05	5	6	1950	30472	auxin influx transmembrane transporter activity	AT2G36910|AT5G01240|AT1G77690|AT2G38120|AT2G47000
31032	6.0672e-06	3.2643e-05	5	6	1950	30472	actomyosin structure organization	AT3G23670|AT3G61650|AT5G05620|AT5G18700|AT4G14150
31519	6.0672e-06	3.2643e-05	5	6	1950	30472	PcG protein complex	AT2G23380|AT4G30200|AT4G02020|AT1G03770|AT5G44280
6401	6.2031e-06	3.3335e-05	15	62	1950	30472	RNA catabolic process	AT2G32550|AT2G06990|AT5G27720|AT5G19400|AT4G27490|AT5G63980|AT5G61780|AT4G03110|AT1G03457|AT3G20800|AT5G12980|AT1G01040|AT5G13570|AT3G13300|AT1G54490
10118	6.297e-06	3.3762e-05	12	41	1950	30472	stomatal movement	AT3G14270|AT5G47100|AT4G08920|AT4G17615|AT3G56960|AT1G09780|AT3G08590|AT4G33950|AT5G59220|AT5G56030|AT1G04400|AT5G65590
30684	6.297e-06	3.3762e-05	12	41	1950	30472	preribosome	AT3G55620|AT3G55510|AT2G17250|AT4G01560|AT3G11964|AT1G15440|AT3G60360|AT4G05410|AT1G17690|AT5G16750|AT2G34570|AT5G41190
43424	6.3447e-06	3.3899e-05	9	23	1950	30472	protein histidine kinase binding	AT5G64070|AT5G08790|AT2G01830|AT1G27320|AT2G38280|AT5G35750|AT1G80100|AT5G42080|AT3G21510
5871	6.3447e-06	3.3899e-05	9	23	1950	30472	kinesin complex	AT3G63480|AT3G16630|AT5G65930|AT1G18370|AT3G43210|AT3G23670|AT3G54870|AT4G14150|AT1G01950
32269	6.3447e-06	3.3899e-05	9	23	1950	30472	negative regulation of cellular protein metabolic process	AT4G22140|AT2G42260|AT1G79280|AT3G57860|AT5G10480|AT1G09570|AT1G04020|AT3G48430|AT4G39100
9901	6.7891e-06	3.619e-05	8	18	1950	30472	anther dehiscence	AT4G25640|AT1G47260|AT1G72520|AT2G02970|AT4G19180|AT5G24330|AT2G41850|AT1G17420
45010	6.7891e-06	3.619e-05	8	18	1950	30472	actin nucleation	AT2G22640|AT2G46225|AT1G30825|AT5G54650|AT5G18410|AT3G27000|AT2G38440|AT2G35110
5200	7.1268e-06	3.7947e-05	11	35	1950	30472	structural constituent of cytoskeleton	AT3G12380|AT1G49240|AT2G37620|AT3G33520|AT1G80260|AT3G18780|AT1G18450|AT3G27000|AT1G13180|AT3G60830|AT5G09810
31667	7.3025e-06	3.8824e-05	31	205	1950	30472	response to nutrient levels	AT5G23630|AT1G55180|AT3G02570|AT3G19190|AT3G25710|AT4G02260|AT1G13300|AT4G24670|AT1G71040|AT1G53310|AT3G62770|AT1G27320|AT5G45900|AT3G01090|AT1G05630|AT2G22240|AT2G02470|AT4G31877|AT3G05630|AT3G03250|AT2G14210|AT3G18290|AT5G60410|AT1G23010|AT2G01830|AT4G29380|AT4G03190|AT3G62980|AT1G54130|AT2G26890|AT5G17290
42562	7.3083e-06	3.8824e-05	10	29	1950	30472	hormone binding	AT4G27630|AT1G64990|AT4G03190|AT3G05120|AT3G62980|AT1G66340|AT2G38120|AT1G12820|AT5G49660|AT3G26810
6810	7.3369e-06	3.8931e-05	200	2318	1950	30472	transport	AT5G42890|AT4G29900|AT3G05040|AT5G64560|AT3G53480|AT3G57280|AT5G61730|AT5G03280|AT1G76850|AT3G05290|AT1G70070|AT5G40480|AT3G56640|AT5G58440|AT2G01830|AT2G21660|AT3G56090|AT5G53550|AT2G01950|AT4G32400|AT4G16370|AT1G73590|AT1G01960|AT5G47200|AT3G27530|AT3G28860|AT2G36910|AT4G22970|AT1G72150|AT2G02810|AT2G47000|AT4G29810|AT1G14360|AT5G23660|AT1G15690|AT1G23080|AT1G14920|AT4G12550|AT4G29380|AT5G13750…
3924	7.77e-06	4.1182e-05	21	112	1950	30472	GTPase activity	AT5G18570|AT1G62750|AT5G27540|AT1G67440|AT2G14120|AT5G42080|AT1G31930|AT1G14830|AT4G34460|AT5G64813|AT2G18390|AT4G21800|AT3G61650|AT5G05620|AT1G08410|AT3G47450|AT3G13870|AT2G26300|AT3G07050|AT1G06220|AT4G33650
46395	8.9739e-06	4.7454e-05	21	113	1950	30472	carboxylic acid catabolic process	AT5G45340|AT5G42890|AT2G16500|AT3G04460|AT5G27520|AT4G10500|AT4G29010|AT2G35690|AT2G37040|AT3G22200|AT3G06810|AT4G14430|AT1G79810|AT5G13790|AT4G34710|AT3G48990|AT3G51840|AT3G05290|AT4G16760|AT4G19230|AT2G26350
16054	8.9739e-06	4.7454e-05	21	113	1950	30472	organic acid catabolic process	AT5G45340|AT5G42890|AT2G16500|AT3G04460|AT5G27520|AT4G10500|AT4G29010|AT2G35690|AT2G37040|AT3G22200|AT3G06810|AT4G14430|AT1G79810|AT5G13790|AT4G34710|AT3G48990|AT3G51840|AT3G05290|AT4G16760|AT4G19230|AT2G26350
16763	9.4196e-06	4.9754e-05	15	64	1950	30472	transferase activity, transferring pentosyl groups	AT2G35510|AT4G01220|AT1G32230|AT4G02500|AT3G62720|AT4G36890|AT1G23550|AT3G47720|AT1G71750|AT5G62520|AT1G70440|AT3G10320|AT4G34740|AT1G27600|AT1G74380
6281	9.5337e-06	5.0299e-05	39	290	1950	30472	DNA repair	AT5G46210|AT4G00020|AT1G05180|AT4G31400|AT2G32950|AT1G66730|AT3G09660|AT1G16890|AT4G21100|AT4G02460|AT4G09140|AT1G76710|AT4G29170|AT1G04020|AT5G45600|AT1G78870|AT3G27060|AT5G48720|AT5G14170|AT3G28730|AT1G66740|AT3G23580|AT5G21140|AT3G25100|AT2G06510|AT4G10710|AT1G65470|AT2G19520|AT5G67100|AT1G14400|AT3G12380|AT5G04560|AT1G50030|AT3G15150|AT5G64630|AT1G18450|AT1G79950|AT5G38110|AT2G02760
51248	9.5744e-06	5.0457e-05	9	24	1950	30472	negative regulation of protein metabolic process	AT4G22140|AT2G42260|AT1G79280|AT3G57860|AT5G10480|AT1G09570|AT1G04020|AT3G48430|AT4G39100
8237	9.7567e-06	5.1359e-05	18	88	1950	30472	metallopeptidase activity	AT4G30920|AT3G04340|AT5G42270|AT2G30950|AT3G16290|AT4G23940|AT1G71696|AT5G64580|AT5G42390|AT1G50250|AT5G35220|AT1G71230|AT1G06430|AT1G79560|AT2G45270|AT1G22920|AT4G14110|AT3G51800
44042	9.7847e-06	5.1448e-05	30	198	1950	30472	glucan metabolic process	AT2G35620|AT1G10670|AT3G02230|AT2G36850|AT3G08550|AT4G02500|AT5G49720|AT1G70730|AT5G15650|AT4G02280|AT1G23190|AT4G26690|AT4G03550|AT3G29810|AT1G05850|AT5G55480|AT5G22510|AT4G04970|AT1G64440|AT5G22130|AT5G48300|AT5G17520|AT3G62720|AT1G14720|AT5G16910|AT1G02730|AT2G01850|AT3G20440|AT3G07160|AT1G74380
10052	1.0001e-05	5.2404e-05	7	14	1950	30472	guard cell differentiation	AT3G12280|AT2G02820|AT1G14350|AT4G14723|AT4G26690|AT5G55480|AT5G65590
10267	1.0001e-05	5.2404e-05	7	14	1950	30472	production of ta-siRNAs involved in RNA interference	AT5G20320|AT1G01040|AT5G23570|AT2G27100|AT3G49500|AT1G69440|AT1G09700
19217	1.0001e-05	5.2404e-05	7	14	1950	30472	regulation of fatty acid metabolic process	AT1G79700|AT1G16060|AT3G47860|AT1G04020|AT5G63980|AT4G03560|AT1G21970
43449	1.0334e-05	5.3958e-05	10	30	1950	30472	cellular alkene metabolic process	AT4G26200|AT3G15010|AT4G37770|AT2G41060|AT1G01480|AT3G56860|AT1G05010|AT1G31340|AT1G73500|AT4G11280
52545	1.0334e-05	5.3958e-05	10	30	1950	30472	callose localization	AT5G03280|AT4G31500|AT3G03250|AT5G17310|AT1G34350|AT1G77850|AT1G66340|AT3G07160|AT4G03550|AT4G23100
6473	1.0334e-05	5.3958e-05	10	30	1950	30472	protein amino acid acetylation	AT1G16710|AT3G09600|AT3G01460|AT3G54610|AT4G37580|AT5G45600|AT1G80410|AT3G12980|AT1G79000|AT2G18000
8017	1.0344e-05	5.3958e-05	21	114	1950	30472	microtubule binding	AT1G80260|AT1G80350|AT3G23670|AT3G54870|AT5G18700|AT3G53180|AT4G26760|AT1G68060|AT3G63480|AT5G55230|AT1G31810|AT3G16640|AT3G16630|AT5G65930|AT1G18370|AT3G43210|AT4G27060|AT2G44190|AT5G44610|AT4G14150|AT1G01950
7015	1.042e-05	5.4295e-05	14	57	1950	30472	actin filament organization	AT4G01710|AT5G18410|AT3G27000|AT2G38440|AT5G56600|AT4G29350|AT2G35110|AT2G19760|AT2G22640|AT2G46225|AT1G30825|AT5G54650|AT1G13180|AT4G30160
15631	1.0515e-05	5.4729e-05	22	123	1950	30472	tubulin binding	AT1G80260|AT1G80350|AT3G23670|AT3G54870|AT5G18700|AT3G60740|AT3G53180|AT4G26760|AT1G68060|AT3G63480|AT5G55230|AT1G31810|AT3G16640|AT3G16630|AT5G65930|AT1G18370|AT3G43210|AT4G27060|AT2G44190|AT5G44610|AT4G14150|AT1G01950
6952	1.0563e-05	5.4917e-05	136	1475	1950	30472	defense response	AT5G21150|AT5G23570|AT3G52430|AT4G02380|AT4G03110|AT1G25540|AT5G03280|AT1G27320|AT3G44880|AT1G05010|AT5G37055|AT2G44950|AT2G22240|AT5G42810|AT3G12810|AT1G80600|AT2G25110|AT3G10920|AT4G23250|AT1G55250|AT1G32230|AT2G35690|AT2G37630|AT3G26810|AT3G15010|AT5G11630|AT2G42260|AT4G17500|AT2G01830|AT2G21660|AT5G61600|AT4G08480|AT4G03190|AT1G01040|AT1G51660|AT1G48410|AT3G12140|AT4G23810|AT5G13010|AT4G30340…
70279	1.0795e-05	5.5998e-05	19	97	1950	30472	vitamin B6 binding	AT4G26200|AT5G23670|AT3G59760|AT3G22200|AT5G11520|AT4G37770|AT5G10330|AT1G01480|AT2G20610|AT3G61440|AT1G70560|AT3G48780|AT2G43750|AT4G11280|AT4G14880|AT1G80600|AT4G13890|AT1G43710|AT2G22250
30170	1.0795e-05	5.5998e-05	19	97	1950	30472	pyridoxal phosphate binding	AT4G26200|AT5G23670|AT3G59760|AT3G22200|AT5G11520|AT4G37770|AT5G10330|AT1G01480|AT2G20610|AT3G61440|AT1G70560|AT3G48780|AT2G43750|AT4G11280|AT4G14880|AT1G80600|AT4G13890|AT1G43710|AT2G22250
45177	1.1067e-05	5.7344e-05	8	19	1950	30472	apical part of cell	AT4G38430|AT3G56960|AT3G04690|AT2G41210|AT2G26420|AT1G73590|AT4G24580|AT3G09070
51234	1.1265e-05	5.8302e-05	200	2334	1950	30472	establishment of localization	AT5G42890|AT4G29900|AT3G05040|AT5G64560|AT3G53480|AT3G57280|AT5G61730|AT5G03280|AT1G76850|AT3G05290|AT1G70070|AT5G40480|AT3G56640|AT5G58440|AT2G01830|AT2G21660|AT3G56090|AT5G53550|AT2G01950|AT4G32400|AT4G16370|AT1G73590|AT1G01960|AT5G47200|AT3G27530|AT3G28860|AT2G36910|AT4G22970|AT1G72150|AT2G02810|AT2G47000|AT4G29810|AT1G14360|AT5G23660|AT1G15690|AT1G23080|AT1G14920|AT4G12550|AT4G29380|AT5G13750…
8285	1.1438e-05	5.9002e-05	6	10	1950	30472	negative regulation of cell proliferation	AT2G36400|AT1G30210|AT5G62000|AT1G17980|AT4G37740|AT4G33495
42304	1.1438e-05	5.9002e-05	6	10	1950	30472	regulation of fatty acid biosynthetic process	AT1G79700|AT1G16060|AT1G04020|AT5G63980|AT4G03560|AT1G21970
10262	1.1438e-05	5.9002e-05	6	10	1950	30472	somatic embryogenesis	AT3G54420|AT5G12840|AT3G20910|AT3G62100|AT5G13790|AT1G21970
19637	1.1835e-05	6.0979e-05	29	190	1950	30472	organophosphate metabolic process	AT2G32010|AT1G55180|AT1G60490|AT1G34120|AT2G38110|AT4G39800|AT4G11850|AT2G21170|AT1G05630|AT2G22240|AT1G06520|AT5G64070|AT3G05630|AT3G02780|AT5G22130|AT1G15110|AT3G57650|AT3G56960|AT1G05470|AT5G14850|AT4G14850|AT5G09350|AT2G26830|AT4G18010|AT2G41210|AT3G45040|AT3G15730|AT5G58560|AT4G30580
71496	1.3074e-05	6.7289e-05	32	221	1950	30472	cellular response to external stimulus	AT5G23630|AT1G55180|AT4G02380|AT3G19190|AT3G25710|AT1G13300|AT4G24670|AT1G71040|AT1G53310|AT3G62770|AT1G27320|AT5G45900|AT4G32551|AT5G05860|AT1G43850|AT2G22240|AT2G02470|AT4G31877|AT3G05630|AT3G03250|AT3G18290|AT5G60410|AT1G23010|AT2G01830|AT1G18390|AT4G29380|AT4G03190|AT2G20610|AT3G62980|AT2G32700|AT1G05680|AT5G17290
6605	1.3219e-05	6.7963e-05	30	201	1950	30472	protein targeting	AT5G22640|AT5G24740|AT4G00026|AT5G47040|AT1G55900|AT2G46310|AT3G46740|AT4G38490|AT3G46560|AT2G04030|AT4G27950|AT4G24540|AT1G79280|AT5G17020|AT3G03110|AT3G04460|AT3G61630|AT5G19820|AT4G23750|AT5G06140|AT4G35450|AT1G79810|AT4G29380|AT5G41950|AT4G01800|AT1G21650|AT2G26350|AT5G53290|AT2G26890|AT4G11140
51493	1.3898e-05	7.1374e-05	13	51	1950	30472	regulation of cytoskeleton organization	AT1G80260|AT3G54870|AT2G38440|AT5G56600|AT5G17410|AT4G29350|AT2G19760|AT5G55230|AT3G16640|AT5G44610|AT5G05970|AT4G30160|AT4G16340
6644	1.4288e-05	7.3293e-05	28	182	1950	30472	phospholipid metabolic process	AT2G32010|AT1G55180|AT1G60490|AT1G34120|AT2G38110|AT4G39800|AT4G11850|AT1G05630|AT2G22240|AT1G06520|AT5G64070|AT3G05630|AT3G02780|AT5G22130|AT1G15110|AT3G57650|AT3G56960|AT1G05470|AT5G14850|AT4G14850|AT5G09350|AT2G26830|AT4G18010|AT2G41210|AT3G45040|AT3G15730|AT5G58560|AT4G30580
8360	1.4381e-05	7.3689e-05	10	31	1950	30472	regulation of cell shape	AT2G36850|AT4G04970|AT5G44610|AT3G07160|AT5G23260|AT4G03550|AT1G01510|AT4G28880|AT4G16340|AT4G28860
19320	1.4661e-05	7.4959e-05	19	99	1950	30472	hexose catabolic process	AT3G04120|AT5G52920|AT5G24400|AT1G34430|AT1G09780|AT1G70730|AT4G26270|AT4G04040|AT2G34590|AT1G23190|AT3G22960|AT1G16300|AT5G61410|AT1G50460|AT1G79530|AT2G21170|AT3G08590|AT1G74030|AT2G01290
46365	1.4661e-05	7.4959e-05	19	99	1950	30472	monosaccharide catabolic process	AT3G04120|AT5G52920|AT5G24400|AT1G34430|AT1G09780|AT1G70730|AT4G26270|AT4G04040|AT2G34590|AT1G23190|AT3G22960|AT1G16300|AT5G61410|AT1G50460|AT1G79530|AT2G21170|AT3G08590|AT1G74030|AT2G01290
16514	1.6722e-05	8.4283e-05	4	4	1950	30472	SWI/SNF complex	AT2G47620|AT2G33610|AT1G21700|AT3G12810
33523	1.6722e-05	8.4283e-05	4	4	1950	30472	histone H2B ubiquitination	AT1G55250|AT2G02760|AT2G44950|AT1G14400
10272	1.6722e-05	8.4283e-05	4	4	1950	30472	response to silver ion	AT2G43570|AT2G32700|AT4G32551|AT1G43850
43478	1.6722e-05	8.4283e-05	4	4	1950	30472	pigment accumulation in response to UV light	AT1G10670|AT4G00730|AT3G28860|AT2G36910
43479	1.6722e-05	8.4283e-05	4	4	1950	30472	pigment accumulation in tissues in response to UV light	AT1G10670|AT4G00730|AT3G28860|AT2G36910
43480	1.6722e-05	8.4283e-05	4	4	1950	30472	pigment accumulation in tissues	AT1G10670|AT4G00730|AT3G28860|AT2G36910
43481	1.6722e-05	8.4283e-05	4	4	1950	30472	anthocyanin accumulation in tissues in response to UV light	AT1G10670|AT4G00730|AT3G28860|AT2G36910
60772	1.6722e-05	8.4283e-05	4	4	1950	30472	leaf phyllotactic patterning	AT4G31400|AT5G65510|AT5G57390|AT5G10510
5034	1.6722e-05	8.4283e-05	4	4	1950	30472	osmosensor activity	AT2G01830|AT1G27320|AT2G17820|AT5G35750
70603	1.6722e-05	8.4283e-05	4	4	1950	30472	SWI/SNF-type complex	AT2G47620|AT2G33610|AT1G21700|AT3G12810
46621	1.6722e-05	8.4283e-05	4	4	1950	30472	negative regulation of organ growth	AT1G19270|AT5G03680|AT3G63530|AT1G32310
7164	1.6722e-05	8.4283e-05	4	4	1950	30472	establishment of tissue polarity	AT1G13980|AT5G03280|AT3G56960|AT2G38120
32585	1.6722e-05	8.4283e-05	4	4	1950	30472	multivesicular body membrane	AT5G07120|AT5G58440|AT2G27600|AT3G59420
96	1.6779e-05	8.448e-05	17	83	1950	30472	sulfur amino acid metabolic process	AT4G26200|AT3G56860|AT3G59760|AT1G31340|AT1G73500|AT3G15010|AT4G37770|AT2G41060|AT4G15415|AT4G38800|AT1G01480|AT3G61440|AT1G05010|AT4G34840|AT2G43750|AT4G11280|AT4G14880
51098	1.7409e-05	8.7555e-05	8	20	1950	30472	regulation of binding	AT3G29035|AT1G74660|AT5G23730|AT2G46830|AT5G39610|AT3G52770|AT1G01060|AT1G04950
9881	1.7712e-05	8.8981e-05	7	15	1950	30472	photoreceptor activity	AT2G18790|AT2G18915|AT4G08920|AT1G09570|AT1G04400|AT5G57360|AT1G68050
6650	1.7913e-05	8.9896e-05	21	118	1950	30472	glycerophospholipid metabolic process	AT2G32010|AT5G64070|AT1G55180|AT1G60490|AT5G22130|AT1G15110|AT3G57650|AT3G56960|AT1G34120|AT1G05470|AT5G14850|AT5G09350|AT4G39800|AT4G11850|AT2G26830|AT4G18010|AT2G41210|AT1G05630|AT3G15730|AT4G30580|AT1G06520
70727	1.877e-05	9.4096e-05	49	409	1950	30472	cellular macromolecule localization	AT5G22640|AT5G24740|AT4G31500|AT4G03550|AT5G03280|AT3G46740|AT4G38490|AT3G10110|AT4G36630|AT2G37678|AT4G24540|AT3G03110|AT3G54220|AT1G66340|AT3G61630|AT5G19820|AT1G79810|AT1G44890|AT3G07160|AT4G01800|AT2G26350|AT3G27530|AT1G67960|AT5G17310|AT4G00026|AT4G23100|AT5G47040|AT1G55900|AT2G46310|AT3G62770|AT3G46560|AT2G04030|AT4G27950|AT1G79280|AT5G17020|AT3G03250|AT3G04460|AT5G51430|AT1G34350|AT4G23750…
16787	1.9289e-05	9.6591e-05	263	3229	1950	30472	hydrolase activity	AT1G44900|AT1G10570|AT5G17690|AT1G09100|AT3G06010|AT5G23570|AT4G29900|AT5G49720|AT2G30950|AT5G63110|AT5G56930|AT3G53480|AT5G02190|AT5G61730|AT2G18390|AT1G79560|AT3G10870|AT3G12810|AT1G70070|AT1G64520|AT2G01830|AT3G20440|AT3G44750|AT1G01040|AT2G41850|AT1G54130|AT2G02480|AT1G54490|AT5G24400|AT5G45940|AT1G61140|AT5G40010|AT3G28860|AT2G36910|AT3G09660|AT2G14120|AT4G23940|AT1G67120|AT2G11890|AT4G22970…
42542	1.9578e-05	9.7933e-05	23	137	1950	30472	response to hydrogen peroxide	AT3G29035|AT5G01600|AT3G04120|AT1G35580|AT1G07890|AT1G56560|AT1G11760|AT5G63160|AT5G10720|AT2G43790|AT1G22770|AT5G39610|AT4G23810|AT5G05340|AT4G32320|AT1G05680|AT5G06720|AT5G37770|AT2G22240|AT2G46240|AT1G34190|AT3G48360|AT4G12570
16591	1.9601e-05	9.7943e-05	14	60	1950	30472	DNA-directed RNA polymerase II, holoenzyme	AT4G20060|AT4G29830|AT2G06210|AT1G61040|AT3G22590|AT2G15430|AT5G61150|AT4G21670|AT3G04740|AT5G01270|AT4G21710|AT1G79730|AT1G02680|AT2G22370
38	1.972e-05	9.8136e-05	10	32	1950	30472	very long-chain fatty acid metabolic process	AT1G01120|AT5G49070|AT2G16280|AT3G54010|AT1G67730|AT1G19440|AT5G10480|AT1G25450|AT1G68530|AT2G26250
48235	1.972e-05	9.8136e-05	10	32	1950	30472	pollen sperm cell differentiation	AT4G35560|AT5G06100|AT1G64110|AT1G18450|AT5G57800|AT2G46040|AT3G11440|AT3G04620|AT1G06520|AT5G59030
51169	1.9725e-05	9.8136e-05	19	101	1950	30472	nuclear transport	AT4G27950|AT3G55620|AT4G24540|AT1G79280|AT5G17020|AT1G13120|AT3G03110|AT3G05040|AT5G24470|AT3G61630|AT3G25520|AT5G19820|AT4G23750|AT2G19560|AT2G46310|AT1G72560|AT2G21660|AT5G53290|AT4G11140
6913	1.9725e-05	9.8136e-05	19	101	1950	30472	nucleocytoplasmic transport	AT4G27950|AT3G55620|AT4G24540|AT1G79280|AT5G17020|AT1G13120|AT3G03110|AT3G05040|AT5G24470|AT3G61630|AT3G25520|AT5G19820|AT4G23750|AT2G19560|AT2G46310|AT1G72560|AT2G21660|AT5G53290|AT4G11140
32876	2.0107e-05	9.9293e-05	5	7	1950	30472	negative regulation of DNA endoreduplication	AT3G15150|AT2G18290|AT1G33240|AT1G20330|AT2G34780
9855	2.0107e-05	9.9293e-05	5	7	1950	30472	determination of bilateral symmetry	AT2G34710|AT1G30490|AT1G52150|AT5G60690|AT2G34260
10440	2.0107e-05	9.9293e-05	5	7	1950	30472	stomatal lineage progression	AT5G10440|AT5G65420|AT3G57230|AT1G49040|AT1G12860
51568	2.0107e-05	9.9293e-05	5	7	1950	30472	histone H3-K4 methylation	AT4G29830|AT2G31650|AT3G22590|AT5G42400|AT1G62830
45604	2.0107e-05	9.9293e-05	5	7	1950	30472	regulation of epidermal cell differentiation	AT1G11130|AT2G46410|AT5G03150|AT3G07050|AT1G01510
45682	2.0107e-05	9.9293e-05	5	7	1950	30472	regulation of epidermis development	AT1G11130|AT2G46410|AT5G03150|AT3G07050|AT1G01510
31507	2.0107e-05	9.9293e-05	5	7	1950	30472	heterochromatin formation	AT4G22140|AT5G64630|AT1G65470|AT4G39100|AT5G58230
4402	2.0355e-05	0.0001003	9	26	1950	30472	histone acetyltransferase activity	AT1G16710|AT3G01460|AT3G54610|AT5G50320|AT3G12980|AT1G79000|AT3G52280|AT3G48360|AT5G63160
4468	2.0355e-05	0.0001003	9	26	1950	30472	lysine N-acetyltransferase activity	AT1G16710|AT3G01460|AT3G54610|AT5G50320|AT3G12980|AT1G79000|AT3G52280|AT3G48360|AT5G63160
44454	2.0455e-05	0.00010058	21	119	1950	30472	nuclear chromosome part	AT1G08260|AT1G44900|AT3G01460|AT5G17690|AT3G28730|AT3G25100|AT3G54560|AT2G06510|AT5G50320|AT4G10710|AT3G59550|AT5G67100|AT4G09140|AT1G26840|AT3G12380|AT4G15900|AT5G55300|AT1G18450|AT5G37055|AT5G39550|AT1G19080
3682	2.0455e-05	0.00010058	21	119	1950	30472	chromatin binding	AT3G07610|AT4G22140|AT3G06400|AT1G18800|AT5G26930|AT3G50870|AT3G25100|AT2G28290|AT5G19310|AT5G15540|AT5G18620|AT5G49160|AT3G44600|AT1G74560|AT1G69770|AT1G51450|AT5G55300|AT5G37055|AT2G46020|AT3G54810|AT4G39100
42546	2.1531e-05	0.00010576	28	186	1950	30472	cell wall biogenesis	AT3G01040|AT3G02230|AT5G15470|AT3G08550|AT5G15650|AT1G19300|AT3G57280|AT3G29810|AT3G01640|AT1G68060|AT4G36890|AT1G02720|AT1G79580|AT2G25110|AT1G27600|AT4G11150|AT2G35610|AT1G33280|AT1G64440|AT5G22130|AT1G80350|AT5G42080|AT1G14720|AT5G16910|AT1G02730|AT2G01850|AT3G19770|AT3G13870
43566	2.2089e-05	0.00010838	23	138	1950	30472	structure-specific DNA binding	AT3G07610|AT1G20900|AT4G00020|AT5G24630|AT1G56260|AT4G02990|AT3G25100|AT5G19310|AT4G02460|AT1G49590|AT4G09140|AT5G55580|AT4G13850|AT2G21660|AT5G11530|AT1G51450|AT4G38680|AT2G21710|AT4G03090|AT5G55300|AT5G11260|AT2G03050|AT4G35540
9664	2.3316e-05	0.00011416	21	120	1950	30472	plant-type cell wall organization	AT3G01040|AT2G35620|AT2G35610|AT3G55830|AT1G12560|AT4G00730|AT5G15470|AT3G56960|AT3G08550|AT4G28370|AT4G26690|AT3G57280|AT3G29810|AT5G63800|AT1G02720|AT2G46710|AT2G32700|AT2G41850|AT4G32551|AT2G41210|AT5G55480
6310	2.3316e-05	0.00011416	21	120	1950	30472	DNA recombination	AT1G18800|AT4G00020|AT1G05180|AT4G31400|AT1G66740|AT5G21140|AT3G25100|AT1G66730|AT2G06510|AT4G32700|AT3G09660|AT1G65470|AT4G02460|AT4G09140|AT1G74560|AT3G15150|AT5G64630|AT1G79950|AT4G29170|AT5G38110|AT1G04020
9616	2.3794e-05	0.00011601	6	11	1950	30472	virus induced gene silencing	AT5G20320|AT4G20910|AT1G01040|AT5G23570|AT1G48410|AT3G49500
52018	2.3794e-05	0.00011601	6	11	1950	30472	modulation by symbiont of RNA levels in host	AT5G20320|AT4G20910|AT1G01040|AT5G23570|AT1G48410|AT3G49500
52249	2.3794e-05	0.00011601	6	11	1950	30472	modulation of RNA levels in other organism involved in symbiotic interaction	AT5G20320|AT4G20910|AT1G01040|AT5G23570|AT1G48410|AT3G49500
4708	2.3794e-05	0.00011601	6	11	1950	30472	MAP kinase kinase activity	AT4G29810|AT1G02090|AT1G51660|AT3G21220|AT1G73500|AT5G56580
8104	2.398e-05	0.00011679	72	684	1950	30472	protein localization	AT5G22640|AT1G13120|AT5G24740|AT3G09840|AT4G31820|AT3G58170|AT5G07120|AT3G46740|AT4G38490|AT5G50230|AT3G10110|AT4G36630|AT2G37678|AT4G24540|AT5G40480|AT3G03110|AT2G31530|AT3G54220|AT3G61630|AT3G01610|AT5G19820|AT4G29350|AT1G17730|AT4G34580|AT1G79810|AT5G58440|AT1G73030|AT2G27600|AT1G44890|AT4G16370|AT4G01800|AT2G26350|AT1G01960|AT5G17290|AT1G13980|AT5G47200|AT3G27530|AT1G67960|AT3G54870|AT4G24190…
18130	2.5616e-05	0.00012463	26	168	1950	30472	heterocycle biosynthetic process	AT2G39800|AT1G10670|AT5G41480|AT4G31500|AT1G56430|AT1G03160|AT4G05450|AT5G14220|AT5G63890|AT1G25220|AT5G10330|AT5G05980|AT2G38280|AT5G58270|AT2G43000|AT2G28880|AT3G55610|AT3G02780|AT2G40400|AT3G21200|AT1G29410|AT3G10160|AT1G71750|AT5G05730|AT5G56080|AT2G26670
9814	2.6281e-05	0.00012774	28	188	1950	30472	defense response, incompatible interaction	AT1G55020|AT3G52430|AT4G23100|AT2G39200|AT4G01370|AT5G03280|AT4G11850|AT3G63420|AT3G44880|AT2G46370|AT2G44950|AT5G56030|AT4G29810|AT1G32230|AT3G49530|AT1G66340|AT3G21220|AT4G25050|AT3G04740|AT2G43570|AT4G35450|AT4G34460|AT1G51660|AT5G64930|AT4G23810|AT5G13010|AT2G46240|AT3G63190
19438	2.635e-05	0.00012793	44	358	1950	30472	aromatic compound biosynthetic process	AT4G25640|AT2G30490|AT5G41480|AT4G31500|AT3G07020|AT3G06350|AT1G03160|AT1G12910|AT2G37040|AT1G73500|AT1G48270|AT3G25710|AT4G00040|AT1G25220|AT2G45400|AT3G44540|AT5G05980|AT5G05340|AT5G58270|AT5G05860|AT3G11340|AT2G26300|AT4G35420|AT1G05850|AT5G22500|AT2G43000|AT2G28880|AT1G68540|AT5G23260|AT2G43790|AT4G37770|AT3G45640|AT1G29410|AT3G10160|AT1G48850|AT1G01480|AT3G44550|AT1G17020|AT1G02050|AT5G05730…
45185	2.6543e-05	0.00012874	8	21	1950	30472	maintenance of protein location	AT2G37678|AT5G24740|AT1G67960|AT3G54220|AT5G51430|AT5G56600|AT4G29350|AT2G19760
33037	2.6676e-05	0.00012924	10	33	1950	30472	polysaccharide localization	AT5G03280|AT4G31500|AT3G03250|AT5G17310|AT1G34350|AT1G77850|AT1G66340|AT3G07160|AT4G03550|AT4G23100
5694	2.8395e-05	0.00013743	39	304	1950	30472	chromosome	AT1G44900|AT3G01460|AT5G17690|AT4G09140|AT1G76710|AT5G55300|AT5G37630|AT5G37055|AT5G39550|AT4G39100|AT4G22140|AT1G08260|AT5G48600|AT1G56260|AT3G28730|AT4G16280|AT5G21140|AT3G25100|AT3G54560|AT5G27740|AT2G06510|AT5G50320|AT4G10710|AT3G59550|AT2G37630|AT4G02570|AT5G67100|AT1G21690|AT1G26840|AT3G12380|AT3G15150|AT4G15900|AT1G18450|AT5G05970|AT2G43410|AT4G30860|AT2G02480|AT1G19080|AT5G02820
44419	2.9104e-05	0.00014072	12	47	1950	30472	interspecies interaction between organisms	AT5G20320|AT4G20910|AT1G01040|AT5G23570|AT1G48410|AT3G07780|AT5G13570|AT3G49500|AT5G51020|AT1G80600|AT2G25110|AT5G48160
9638	2.9743e-05	0.00014321	7	16	1950	30472	phototropism	AT2G18790|AT3G15540|AT4G08920|AT1G09570|AT5G20730|AT1G04400|AT2G26890
10160	2.9743e-05	0.00014321	7	16	1950	30472	formation of organ boundary	AT4G00220|AT2G28290|AT3G28860|AT5G53950|AT2G31090|AT2G46020|AT2G31160
48859	2.9743e-05	0.00014321	7	16	1950	30472	formation of anatomical boundary	AT4G00220|AT2G28290|AT3G28860|AT5G53950|AT2G31090|AT2G46020|AT2G31160
16324	2.9743e-05	0.00014321	7	16	1950	30472	apical plasma membrane	AT4G38430|AT3G56960|AT3G04690|AT2G41210|AT2G26420|AT4G24580|AT3G09070
71103	3.1928e-05	0.00015357	17	87	1950	30472	DNA conformation change	AT4G22140|AT3G06400|AT5G48600|AT1G18800|AT1G44900|AT3G20780|AT5G18620|AT1G65470|AT1G74560|AT2G21660|AT4G38680|AT5G55300|AT5G64630|AT5G37630|AT4G39100|AT5G58230|AT5G02820
6555	3.3311e-05	0.00016005	13	55	1950	30472	methionine metabolic process	AT4G26200|AT3G56860|AT1G31340|AT1G73500|AT3G15010|AT4G37770|AT2G41060|AT4G15415|AT4G38800|AT1G01480|AT1G05010|AT4G34840|AT4G11280
16032	3.5261e-05	0.00016925	14	63	1950	30472	viral reproduction	AT1G44900|AT1G32230|AT5G23570|AT3G07780|AT5G24590|AT5G42190|AT5G48160|AT3G12280|AT1G75950|AT4G18710|AT1G48410|AT5G13570|AT5G51020|AT5G13180
90305	3.6558e-05	0.00017529	12	48	1950	30472	nucleic acid phosphodiester bond hydrolysis	AT5G57880|AT4G04885|AT2G46685|AT4G20910|AT1G01690|AT1G01040|AT3G04680|AT5G23880|AT1G48920|AT5G13480|AT1G09700|AT5G41190
228	3.7191e-05	0.00017814	22	133	1950	30472	nuclear chromosome	AT1G08260|AT1G44900|AT3G01460|AT5G17690|AT3G28730|AT3G25100|AT3G54560|AT2G06510|AT5G50320|AT4G10710|AT3G59550|AT4G02570|AT5G67100|AT4G09140|AT1G26840|AT3G12380|AT4G15900|AT5G55300|AT1G18450|AT5G37055|AT5G39550|AT1G19080
35091	3.7237e-05	0.00017817	17	88	1950	30472	phosphoinositide binding	AT2G31650|AT3G25230|AT4G24580|AT1G47270|AT5G06140|AT5G07120|AT3G14270|AT5G58440|AT5G13300|AT3G62770|AT1G53320|AT4G11850|AT3G63300|AT5G44610|AT1G61620|AT3G15730|AT4G33650
9566	3.7793e-05	0.00018046	11	41	1950	30472	fertilization	AT3G12280|AT3G03690|AT4G30930|AT3G04690|AT3G51550|AT1G64980|AT3G59760|AT2G47470|AT2G43750|AT4G14880|AT4G02590
51701	3.7793e-05	0.00018046	11	41	1950	30472	interaction with host	AT5G20320|AT4G20910|AT1G01040|AT5G23570|AT1G48410|AT3G07780|AT5G13570|AT3G49500|AT5G51020|AT2G25110|AT5G48160
6725	3.8573e-05	0.000184	62	573	1950	30472	cellular aromatic compound metabolic process	AT3G02130|AT5G41480|AT4G08920|AT4G31500|AT3G07020|AT1G03160|AT1G12910|AT5G14220|AT1G73500|AT1G48270|AT4G00040|AT1G25220|AT2G45400|AT5G05980|AT3G63440|AT5G05340|AT5G58270|AT5G05860|AT3G10870|AT4G35420|AT1G05850|AT5G47990|AT1G66340|AT2G43790|AT4G37770|AT4G13940|AT3G45640|AT3G10160|AT1G48850|AT1G01480|AT2G20610|AT3G44550|AT1G70560|AT1G17020|AT1G02050|AT1G05680|AT4G34740|AT2G26670|AT4G25640|AT2G30490…
19843	3.9103e-05	0.00018633	18	97	1950	30472	rRNA binding	AT1G35680|AT4G01560|AT4G00100|AT3G06430|AT1G05190|AT1G33140|AT4G30930|AT1G17560|AT3G25520|AT2G34570|AT3G04400|AT3G48930|AT1G31817|AT1G17690|AT5G39740|AT2G33800|AT1G75350|AT1G72050
9292	4.0037e-05	0.00019039	9	28	1950	30472	genetic transfer	AT5G22650|AT5G09790|AT3G44750|AT5G50320|AT5G38110|AT2G23380|AT1G06230|AT1G79000|AT5G49160
9294	4.0037e-05	0.00019039	9	28	1950	30472	DNA mediated transformation	AT5G22650|AT5G09790|AT3G44750|AT5G50320|AT5G38110|AT2G23380|AT1G06230|AT1G79000|AT5G49160
9644	4.2044e-05	0.00019973	15	72	1950	30472	response to high light intensity	AT5G42270|AT4G17490|AT4G08920|AT2G30950|AT1G17420|AT1G50250|AT3G18780|AT1G01470|AT3G47860|AT1G06430|AT5G04410|AT5G58070|AT2G22240|AT2G46240|AT1G02330
6576	4.3312e-05	0.00020555	17	89	1950	30472	cellular biogenic amine metabolic process	AT1G55180|AT1G15110|AT4G31500|AT2G16500|AT1G56430|AT5G19530|AT5G08170|AT1G25220|AT1G29410|AT4G11850|AT2G26830|AT5G05730|AT4G34710|AT5G56080|AT3G15730|AT5G05920|AT1G43710
10048	4.5002e-05	0.00021291	6	12	1950	30472	vernalization response	AT5G65050|AT4G00650|AT5G65080|AT5G17690|AT3G24440|AT5G61150
10093	4.5002e-05	0.00021291	6	12	1950	30472	specification of floral organ identity	AT5G64390|AT2G06990|AT4G20910|AT2G31650|AT4G36920|AT1G22920
70828	4.5002e-05	0.00021291	6	12	1950	30472	heterochromatin organization	AT4G22140|AT5G64630|AT1G65470|AT5G55390|AT4G39100|AT5G58230
6720	4.6963e-05	0.00022196	25	164	1950	30472	isoprenoid metabolic process	AT1G10670|AT2G26170|AT2G34630|AT5G45340|AT1G05160|AT1G80340|AT4G32810|AT5G48230|AT1G30100|AT5G48010|AT4G23660|AT2G18790|AT1G77300|AT4G19230|AT2G32440|AT3G02780|AT5G47990|AT5G61780|AT5G48000|AT4G14850|AT5G13790|AT2G48120|AT2G07050|AT5G58560|AT2G26670
31407	4.8256e-05	0.00022784	11	42	1950	30472	oxylipin metabolic process	AT1G73680|AT1G55020|AT1G72520|AT3G48520|AT4G29010|AT2G35690|AT1G76680|AT2G46370|AT1G17420|AT4G16760|AT3G22400
398	4.9363e-05	0.00023283	21	126	1950	30472	nuclear mRNA splicing, via spliceosome	AT1G32490|AT4G03430|AT5G27720|AT5G16780|AT3G55220|AT1G09230|AT2G41500|AT3G55200|AT2G13540|AT5G63370|AT1G60170|AT2G35340|AT2G21660|AT5G62640|AT1G27650|AT4G15900|AT5G13010|AT4G31770|AT5G42820|AT2G43410|AT1G77180
34504	4.9849e-05	0.00023488	13	57	1950	30472	protein localization in nucleus	AT2G37678|AT4G27950|AT4G24540|AT1G79280|AT5G17020|AT3G03110|AT3G54220|AT3G61630|AT5G19820|AT4G23750|AT2G46310|AT5G53290|AT4G11140
42742	5.0128e-05	0.00023595	41	334	1950	30472	defense response to bacterium	AT5G47220|AT5G24400|AT4G31500|AT1G55020|AT3G52430|AT4G03550|AT4G23100|AT4G24670|AT2G22300|AT5G03280|AT4G11850|AT1G27320|AT3G44880|AT5G37055|AT2G46370|AT2G22240|AT5G42810|AT3G12810|AT1G80600|AT2G25110|AT5G56030|AT4G11150|AT3G10920|AT4G23250|AT5G17880|AT1G32230|AT3G54560|AT1G66340|AT2G37630|AT2G39730|AT2G43790|AT5G11630|AT4G35450|AT1G19180|AT3G16640|AT2G01830|AT4G15900|AT4G23810|AT1G70560|AT4G33950…
9558	5.0776e-05	0.00023708	5	8	1950	30472	cellularization of the embryo sac	AT2G18390|AT1G18370|AT3G43210|AT1G50240|AT5G48030
9799	5.0776e-05	0.00023708	5	8	1950	30472	specification of symmetry	AT2G34710|AT1G30490|AT1G52150|AT5G60690|AT2G34260
45962	5.0776e-05	0.00023708	5	8	1950	30472	positive regulation of development, heterochronic	AT4G18390|AT3G15030|AT3G02150|AT1G30210|AT2G31070
80050	5.0776e-05	0.00023708	5	8	1950	30472	regulation of seed development	AT2G25180|AT4G31920|AT3G16857|AT4G16110|AT2G35230
80113	5.0776e-05	0.00023708	5	8	1950	30472	regulation of seed growth	AT2G25180|AT4G31920|AT3G16857|AT4G16110|AT2G35230
31209	5.0776e-05	0.00023708	5	8	1950	30472	SCAR complex	AT2G22640|AT2G46225|AT5G18410|AT2G38440|AT2G35110
48446	5.0776e-05	0.00023708	5	8	1950	30472	petal morphogenesis	AT3G02000|AT1G59640|AT5G03680|AT1G17980|AT3G12810
48587	5.0776e-05	0.00023708	5	8	1950	30472	regulation of short-day photoperiodism, flowering	AT5G65080|AT5G13790|AT4G30200|AT3G57390|AT4G26000
5635	5.1113e-05	0.00023841	20	117	1950	30472	nuclear envelope	AT4G01540|AT1G79280|AT5G17020|AT1G13120|AT3G09840|AT5G40480|AT3G03110|AT1G15110|AT3G05040|AT1G55540|AT5G17410|AT5G61780|AT5G19820|AT5G43070|AT1G72560|AT4G17500|AT4G29380|AT1G47200|AT5G05620|AT5G05970
46164	5.2021e-05	0.0002424	19	108	1950	30472	alcohol catabolic process	AT3G04120|AT5G52920|AT5G24400|AT1G34430|AT1G09780|AT1G70730|AT4G26270|AT4G04040|AT2G34590|AT1G23190|AT3G22960|AT1G16300|AT5G61410|AT1G50460|AT1G79530|AT2G21170|AT3G08590|AT1G74030|AT2G01290
33365	5.5622e-05	0.00025892	21	127	1950	30472	protein localization in organelle	AT2G37678|AT4G27950|AT4G24540|AT1G79280|AT5G17020|AT5G24740|AT3G03110|AT1G67960|AT3G54220|AT5G51430|AT4G00026|AT3G61630|AT5G19820|AT4G23750|AT1G55900|AT2G46310|AT3G46560|AT5G41950|AT3G10110|AT5G53290|AT4G11140
50790	5.6287e-05	0.00026175	28	196	1950	30472	regulation of catalytic activity	AT1G13980|AT3G57860|AT1G09000|AT5G63770|AT4G21540|AT1G48270|AT2G23430|AT4G22910|AT2G18290|AT5G04470|AT5G58270|AT2G31305|AT1G61620|AT3G48360|AT4G29810|AT4G11920|AT3G60740|AT3G21220|AT4G28980|AT4G24580|AT4G14850|AT2G42260|AT3G44110|AT3G45640|AT4G19600|AT1G51660|AT4G30340|AT1G01960
155	5.6985e-05	0.0002642	8	23	1950	30472	two-component sensor activity	AT2G18790|AT2G01830|AT1G27320|AT2G17820|AT1G09570|AT5G35750|AT1G66340|AT5G10720
16775	5.6985e-05	0.0002642	8	23	1950	30472	phosphotransferase activity, nitrogenous group as acceptor	AT2G18790|AT2G01830|AT1G27320|AT2G17820|AT1G09570|AT5G35750|AT1G66340|AT5G10720
4673	5.6985e-05	0.0002642	8	23	1950	30472	protein histidine kinase activity	AT2G18790|AT2G01830|AT1G27320|AT2G17820|AT1G09570|AT5G35750|AT1G66340|AT5G10720
19900	6.0515e-05	0.00028028	13	58	1950	30472	kinase binding	AT5G64070|AT4G08500|AT5G42080|AT2G31270|AT3G21510|AT5G08790|AT2G01830|AT4G17615|AT1G27320|AT2G38280|AT5G35750|AT1G80100|AT5G13290
8652	6.5556e-05	0.00030333	29	208	1950	30472	cellular amino acid biosynthetic process	AT2G39800|AT4G31500|AT3G06350|AT3G59760|AT5G63890|AT1G48270|AT3G53180|AT1G25220|AT5G10330|AT3G61440|AT2G26300|AT4G14880|AT1G80600|AT2G43000|AT2G28880|AT3G55610|AT2G37250|AT1G18640|AT3G23940|AT5G37600|AT1G29410|AT1G48850|AT4G38800|AT2G43090|AT5G05730|AT4G34840|AT2G43750|AT4G34200|AT2G22250
4386	6.7513e-05	0.00031207	28	198	1950	30472	helicase activity	AT1G12770|AT1G44900|AT5G20320|AT5G26742|AT3G06010|AT1G61140|AT2G28290|AT5G19310|AT3G09660|AT2G35340|AT1G16280|AT1G08840|AT3G12810|AT1G70070|AT4G15570|AT1G32490|AT3G06400|AT2G06990|AT2G25170|AT3G25100|AT5G22330|AT4G32700|AT1G01040|AT1G79950|AT5G13010|AT2G46020|AT4G14790|AT1G20960
48046	6.8687e-05	0.00031718	53	477	1950	30472	apoplast	AT3G09840|AT1G09780|AT1G68795|AT2G01505|AT5G49360|AT1G02900|AT5G61410|AT5G05340|AT4G13195|AT1G05850|AT4G14880|AT3G04120|AT1G68765|AT2G39730|AT2G21660|AT4G13940|AT2G25660|AT3G48990|AT2G46140|AT2G43750|AT4G38740|AT1G63245|AT1G62750|AT4G24190|AT1G70730|AT1G73965|AT1G70895|AT1G72150|AT1G53310|AT5G01040|AT2G02850|AT2G21170|AT2G28000|AT5G67360|AT1G08260|AT3G28455|AT5G48300|AT3G24770|AT2G42600|AT5G08370…
42435	6.9665e-05	0.00032074	12	51	1950	30472	indole derivative biosynthetic process	AT2G43790|AT1G25220|AT3G45640|AT1G29410|AT4G31500|AT2G20610|AT1G70560|AT5G05730|AT1G73500|AT4G23100|AT2G43000|AT4G24670
4222	6.9665e-05	0.00032074	12	51	1950	30472	metalloendopeptidase activity	AT3G04340|AT5G42270|AT1G50250|AT5G35220|AT2G30950|AT1G06430|AT3G16290|AT4G23940|AT1G79560|AT2G45270|AT4G14110|AT5G42390
6402	6.9665e-05	0.00032074	12	51	1950	30472	mRNA catabolic process	AT2G32550|AT1G03457|AT3G20800|AT5G12980|AT5G27720|AT5G19400|AT5G13570|AT4G27490|AT3G13300|AT5G61780|AT1G54490|AT4G03110
42787	7.3106e-05	0.00033624	13	59	1950	30472	protein ubiquitination involved in ubiquitin-dependent protein catabolic process	AT5G46210|AT4G28370|AT4G02570|AT3G58040|AT1G69670|AT2G04660|AT5G37890|AT3G13672|AT4G38600|AT4G12570|AT1G26830|AT2G26130|AT4G14220
19199	7.3807e-05	0.00033829	9	30	1950	30472	transmembrane receptor protein kinase activity	AT4G39400|AT2G01830|AT1G34210|AT2G01950|AT4G28490|AT1G71830|AT3G59420|AT2G13790|AT5G07280
30	7.3843e-05	0.00033829	7	18	1950	30472	mannosyltransferase activity	AT1G02730|AT5G22740|AT5G22130|AT1G16570|AT5G14850|AT2G25110|AT5G16910
9574	7.3843e-05	0.00033829	7	18	1950	30472	preprophase band	AT2G43790|AT5G55230|AT1G31810|AT3G48750|AT5G18700|AT2G34680|AT4G26760
35196	7.3843e-05	0.00033829	7	18	1950	30472	production of miRNAs involved in gene silencing by miRNA	AT4G20910|AT1G01040|AT5G13010|AT2G27100|AT2G13540|AT1G09700|AT5G23080
44403	7.6802e-05	0.0003515	11	44	1950	30472	symbiosis, encompassing mutualism through parasitism	AT5G20320|AT4G20910|AT1G01040|AT5G23570|AT1G48410|AT3G07780|AT5G13570|AT3G49500|AT5G51020|AT2G25110|AT5G48160
51258	7.9037e-05	0.00035606	6	13	1950	30472	protein polymerization	AT2G22640|AT5G55230|AT4G13510|AT5G54650|AT4G01710|AT5G56600
8156	7.9037e-05	0.00035606	6	13	1950	30472	negative regulation of DNA replication	AT3G15150|AT2G18290|AT1G33240|AT1G20330|AT5G67100|AT2G34780
16574	7.9337e-05	0.00035606	4	5	1950	30472	histone ubiquitination	AT1G55250|AT2G02760|AT2G44950|AT1G14400
50879	7.9337e-05	0.00035606	4	5	1950	30472	multicellular organismal movement	AT4G27060|AT2G25930|AT3G04630|AT5G61380
10031	7.9337e-05	0.00035606	4	5	1950	30472	circumnutation	AT4G27060|AT2G25930|AT3G04630|AT5G61380
10219	7.9337e-05	0.00035606	4	5	1950	30472	regulation of vernalization response	AT5G65050|AT4G24540|AT2G33835|AT2G22370
10222	7.9337e-05	0.00035606	4	5	1950	30472	stem vascular tissue pattern formation	AT2G20120|AT1G43130|AT1G31770|AT1G17840
43473	7.9337e-05	0.00035606	4	5	1950	30472	pigmentation	AT1G10670|AT4G00730|AT3G28860|AT2G36910
43476	7.9337e-05	0.00035606	4	5	1950	30472	pigment accumulation	AT1G10670|AT4G00730|AT3G28860|AT2G36910
10971	7.9337e-05	0.00035606	4	5	1950	30472	positive regulation of G2/M transition of mitotic cell cycle	AT5G14250|AT5G42970|AT1G71230|AT1G22920
19789	7.9337e-05	0.00035606	4	5	1950	30472	SUMO ligase activity	AT5G60410|AT3G57870|AT3G15150|AT1G08910
60771	7.9337e-05	0.00035606	4	5	1950	30472	phyllotactic patterning	AT4G31400|AT5G65510|AT5G57390|AT5G10510
3680	7.9337e-05	0.00035606	4	5	1950	30472	AT DNA binding	AT2G45430|AT1G76500|AT1G20900|AT2G35270
5987	7.9337e-05	0.00035606	4	5	1950	30472	sucrose catabolic process	AT1G35580|AT5G22510|AT1G56560|AT4G09510
80001	7.9337e-05	0.00035606	4	5	1950	30472	mucilage extrusion from seed coat	AT5G67360|AT2G32700|AT4G32551|AT4G28370
31330	7.9337e-05	0.00035606	4	5	1950	30472	negative regulation of cellular catabolic process	AT2G42260|AT4G24960|AT3G57860|AT1G50030
48530	7.9337e-05	0.00035606	4	5	1950	30472	fruit morphogenesis	AT5G13680|AT2G31090|AT5G45710|AT1G01510
9756	7.9337e-05	0.00035606	10	37	1950	30472	carbohydrate mediated signaling	AT5G46210|AT5G03280|AT1G09100|AT4G15900|AT5G64930|AT1G66340|AT2G36270|AT3G01090|AT1G05630|AT3G48360
10182	7.9337e-05	0.00035606	10	37	1950	30472	sugar mediated signaling pathway	AT5G46210|AT5G03280|AT1G09100|AT4G15900|AT5G64930|AT1G66340|AT2G36270|AT3G01090|AT1G05630|AT3G48360
5083	7.9337e-05	0.00035606	10	37	1950	30472	small GTPase regulator activity	AT1G13980|AT5G64070|AT4G38430|AT4G35560|AT3G07880|AT1G52240|AT3G19770|AT4G16340|AT1G01960|AT5G43900
16573	8.069e-05	0.00036177	8	24	1950	30472	histone acetylation	AT1G16710|AT3G09600|AT3G01460|AT3G54610|AT5G45600|AT3G12980|AT1G79000|AT2G18000
19842	8.2389e-05	0.00036904	22	140	1950	30472	vitamin binding	AT3G06300|AT4G26200|AT5G23670|AT3G59760|AT2G17720|AT3G22200|AT5G11520|AT4G37770|AT5G10330|AT1G01480|AT2G20610|AT3G61440|AT1G70560|AT1G05010|AT3G48780|AT2G43750|AT4G11280|AT4G14880|AT1G80600|AT4G13890|AT1G43710|AT2G22250
42170	8.828e-05	0.00039504	33	254	1950	30472	plastid membrane	AT5G22640|AT3G08630|AT1G03160|AT4G23940|AT3G57280|AT2G37860|AT5G03080|AT3G46740|AT4G38490|AT3G44880|AT5G12470|AT5G51020|AT5G58070|AT4G31780|AT5G18570|AT3G04340|AT5G22790|AT3G08640|AT2G31530|AT5G19620|AT2G40400|AT3G56140|AT5G17520|AT3G16290|AT5G23040|AT5G54800|AT2G19450|AT4G35450|AT5G35220|AT4G32400|AT1G21650|AT5G58560|AT4G30580
46982	9.3667e-05	0.00041874	20	122	1950	30472	protein heterodimerization activity	AT4G00650|AT4G24540|AT2G35940|AT3G54560|AT3G07780|AT5G49020|AT1G68130|AT1G30970|AT3G51060|AT5G48160|AT5G66350|AT3G06930|AT4G39400|AT5G07120|AT5G60540|AT4G32551|AT1G43850|AT1G02680|AT1G21970|AT1G04950
19220	9.492e-05	0.00042393	15	77	1950	30472	regulation of phosphate metabolic process	AT4G29810|AT1G09000|AT5G63770|AT4G21540|AT3G21220|AT4G28980|AT2G23430|AT3G45640|AT4G19600|AT1G51660|AT5G10480|AT5G04470|AT4G30340|AT2G31305|AT4G38740
10540	9.8118e-05	0.00043779	9	31	1950	30472	basipetal auxin transport	AT1G13980|AT3G22942|AT4G30960|AT5G13750|AT5G55540|AT4G31820|AT3G28860|AT2G36910|AT2G47000
18024	0.00010153	0.00045215	10	38	1950	30472	histone-lysine N-methyltransferase activity	AT1G76710|AT2G31650|AT1G51450|AT5G09790|AT4G15180|AT1G77300|AT5G24330|AT5G42400|AT2G23380|AT4G02020
5985	0.00010153	0.00045215	10	38	1950	30472	sucrose metabolic process	AT1G35580|AT5G22510|AT1G12240|AT1G56560|AT5G11110|AT3G03250|AT4G02280|AT4G09510|AT4G33950|AT3G22200
5984	0.00010164	0.00045218	14	69	1950	30472	disaccharide metabolic process	AT1G35580|AT5G22510|AT1G12240|AT1G56560|AT3G03250|AT1G70730|AT4G02280|AT5G17520|AT1G23190|AT4G09510|AT3G22200|AT5G11110|AT4G33950|AT2G43000
790	0.00010393	0.00046195	12	53	1950	30472	nuclear chromatin	AT4G09140|AT3G12380|AT3G01460|AT5G17690|AT3G28730|AT3G54560|AT1G18450|AT2G06510|AT5G50320|AT4G10710|AT5G37055|AT5G39550
10199	0.0001082	0.00047907	5	9	1950	30472	organ boundary specification between lateral organs and the meristem	AT4G00220|AT2G28290|AT2G31090|AT2G46020|AT2G31160
45792	0.0001082	0.00047907	5	9	1950	30472	negative regulation of cell size	AT2G17040|AT1G02900|AT1G33240|AT3G51550|AT4G40060
31060	0.0001082	0.00047907	5	9	1950	30472	regulation of histone methylation	AT3G44600|AT2G06210|AT3G24440|AT1G77300|AT5G55390
16363	0.0001082	0.00047907	5	9	1950	30472	nuclear matrix	AT2G35510|AT1G72560|AT1G32230|AT5G62520|AT5G43070
9962	0.00011046	0.0004877	7	19	1950	30472	regulation of flavonoid biosynthetic process	AT1G69690|AT1G64520|AT2G26170|AT5G04410|AT5G46845|AT2G39175|AT2G28350
22610	0.00011046	0.0004877	7	19	1950	30472	biological adhesion	AT1G13980|AT3G55830|AT2G38440|AT1G78240|AT3G46550|AT3G22200|AT4G24580
7155	0.00011046	0.0004877	7	19	1950	30472	cell adhesion	AT1G13980|AT3G55830|AT2G38440|AT1G78240|AT3G46550|AT3G22200|AT4G24580
51174	0.00011064	0.00048802	15	78	1950	30472	regulation of phosphorus metabolic process	AT4G29810|AT1G09000|AT5G63770|AT4G21540|AT3G21220|AT4G28980|AT2G23430|AT3G45640|AT4G19600|AT1G51660|AT5G10480|AT5G04470|AT4G30340|AT2G31305|AT4G38740
16853	0.00011159	0.00049173	34	268	1950	30472	isomerase activity	AT3G02570|AT3G02230|AT3G54010|AT1G09780|AT3G25230|AT1G70730|AT5G15650|AT3G20780|AT5G48010|AT1G23190|AT1G63180|AT2G15790|AT3G44600|AT5G58710|AT4G39800|AT5G55300|AT5G61410|AT2G21170|AT2G22240|AT3G02780|AT3G02000|AT1G64440|AT4G29010|AT3G21640|AT4G14430|AT1G53500|AT1G29410|AT3G08590|AT2G47470|AT2G07050|AT1G21750|AT5G02820|AT2G01290|AT4G38740
6007	0.0001164	0.00051244	17	96	1950	30472	glucose catabolic process	AT3G04120|AT5G52920|AT5G24400|AT1G34430|AT1G09780|AT4G26270|AT4G04040|AT2G34590|AT3G22960|AT1G16300|AT5G61410|AT1G50460|AT1G79530|AT2G21170|AT3G08590|AT1G74030|AT2G01290
31969	0.00011811	0.00051949	32	247	1950	30472	chloroplast membrane	AT5G22640|AT3G08630|AT1G03160|AT4G23940|AT3G57280|AT2G37860|AT5G03080|AT3G46740|AT3G44880|AT5G12470|AT5G51020|AT5G58070|AT4G31780|AT5G18570|AT3G04340|AT5G22790|AT3G08640|AT2G31530|AT5G19620|AT2G40400|AT3G56140|AT5G17520|AT3G16290|AT5G23040|AT5G54800|AT2G19450|AT4G35450|AT5G35220|AT4G32400|AT1G21650|AT5G58560|AT4G30580
725	0.00012591	0.00055325	12	54	1950	30472	recombinational repair	AT4G00020|AT4G31400|AT1G66740|AT3G15150|AT5G21140|AT3G25100|AT5G64630|AT1G79950|AT3G09660|AT5G38110|AT1G04020|AT1G65470
932	0.00012876	0.0005638	10	39	1950	30472	cytoplasmic mRNA processing body	AT3G01150|AT3G63210|AT5G27720|AT5G19400|AT1G03060|AT5G13570|AT3G13300|AT5G61780|AT1G54490|AT5G53180
51347	0.00012876	0.0005638	10	39	1950	30472	positive regulation of transferase activity	AT4G29810|AT3G45640|AT4G19600|AT1G09000|AT1G51660|AT5G63770|AT4G30340|AT4G21540|AT3G21220|AT3G48360
42176	0.00012879	0.0005638	9	32	1950	30472	regulation of protein catabolic process	AT2G42260|AT3G57860|AT2G32950|AT2G18290|AT1G71230|AT1G32310|AT1G20200|AT2G01570|AT2G26130
7033	0.00012879	0.0005638	9	32	1950	30472	vacuole organization	AT3G14270|AT3G62770|AT2G27600|AT1G03060|AT5G54800|AT3G19190|AT4G33240|AT2G26890|AT5G17290
9986	0.00013081	0.00057102	6	14	1950	30472	cell surface	AT2G34650|AT1G70940|AT3G46550|AT3G59420|AT2G38120|AT1G17840
52546	0.00013081	0.00057102	6	14	1950	30472	cell wall pectin metabolic process	AT3G01040|AT2G35610|AT3G55830|AT5G15470|AT2G32700|AT4G32551
32350	0.00013081	0.00057102	6	14	1950	30472	regulation of hormone metabolic process	AT4G37650|AT1G25220|AT3G08510|AT2G45400|AT5G05730|AT1G68130
7005	0.00013269	0.00057865	16	88	1950	30472	mitochondrion organization	AT3G08950|AT4G05410|AT5G40770|AT4G00026|AT5G27540|AT2G14120|AT2G31170|AT1G11870|AT1G14830|AT5G64050|AT1G55900|AT4G29060|AT3G46560|AT5G41950|AT4G34620|AT4G33650
31668	0.00014012	0.00060914	29	217	1950	30472	cellular response to extracellular stimulus	AT5G23630|AT1G55180|AT4G02380|AT3G19190|AT3G25710|AT1G13300|AT4G24670|AT1G71040|AT1G53310|AT3G62770|AT1G27320|AT5G45900|AT5G05860|AT2G22240|AT2G02470|AT4G31877|AT3G05630|AT3G03250|AT3G18290|AT5G60410|AT1G23010|AT2G01830|AT1G18390|AT4G29380|AT4G03190|AT2G20610|AT3G62980|AT1G05680|AT5G17290
9064	0.00014034	0.00060914	14	71	1950	30472	glutamine family amino acid metabolic process	AT2G39800|AT3G55610|AT2G16500|AT3G22200|AT3G53180|AT5G37600|AT1G25220|AT5G60540|AT4G34710|AT4G34740|AT1G74260|AT1G80600|AT2G43000|AT2G28880
42325	0.00014034	0.00060914	14	71	1950	30472	regulation of phosphorylation	AT4G29810|AT1G09000|AT5G63770|AT4G21540|AT3G21220|AT4G28980|AT2G23430|AT3G45640|AT4G19600|AT1G51660|AT5G10480|AT5G04470|AT4G30340|AT4G38740
5819	0.00014034	0.00060914	14	71	1950	30472	spindle	AT3G09840|AT5G17410|AT5G18700|AT4G02570|AT2G34680|AT2G19760|AT4G26760|AT1G68060|AT1G75950|AT5G55230|AT1G31810|AT2G20000|AT5G05970|AT2G04660
6096	0.00014034	0.00060914	14	71	1950	30472	glycolysis	AT3G04120|AT5G52920|AT1G34430|AT1G09780|AT4G26270|AT4G04040|AT2G34590|AT3G22960|AT1G16300|AT1G50460|AT1G79530|AT2G21170|AT3G08590|AT1G74030
22613	0.00014312	0.00062065	46	408	1950	30472	ribonucleoprotein complex biogenesis	AT3G55620|AT3G53020|AT3G11964|AT4G03430|AT1G15440|AT5G16780|AT4G05410|AT1G03060|AT1G67120|AT3G20780|AT2G34570|AT1G60170|AT1G18080|AT1G16280|AT1G31817|AT1G17690|AT5G02250|AT2G21070|AT1G48920|AT3G47450|AT3G07050|AT1G02780|AT3G51800|AT5G18570|AT3G55510|AT4G01560|AT5G27720|AT4G27490|AT4G05440|AT5G16750|AT2G34260|AT3G25520|AT1G31660|AT3G57290|AT2G39990|AT5G41190|AT2G17250|AT3G60360|AT1G48630|AT5G39740…
51053	0.00015276	0.00066059	8	26	1950	30472	negative regulation of DNA metabolic process	AT1G75950|AT3G15150|AT2G18290|AT1G79950|AT1G33240|AT1G20330|AT5G67100|AT2G34780
5657	0.00015276	0.00066059	8	26	1950	30472	replication fork	AT1G08260|AT1G21690|AT3G25100|AT4G15900|AT5G55300|AT5G27740|AT2G02480|AT5G67100
32040	0.00015276	0.00066059	8	26	1950	30472	small-subunit processome	AT2G17250|AT3G11964|AT1G15440|AT3G60360|AT4G05410|AT1G17690|AT5G16750|AT2G34570
51783	0.00016057	0.00069111	7	20	1950	30472	regulation of nuclear division	AT3G12280|AT2G42260|AT1G79280|AT3G57860|AT2G18290|AT5G04470|AT4G21530
43622	0.00016057	0.00069111	7	20	1950	30472	cortical microtubule organization	AT5G08120|AT5G55230|AT1G80350|AT3G44200|AT5G49720|AT5G44610|AT4G01370
51817	0.00016057	0.00069111	7	20	1950	30472	modification of morphology or physiology of other organism involved in symbiotic interaction	AT5G20320|AT4G20910|AT1G01040|AT5G23570|AT1G48410|AT3G49500|AT2G25110
44003	0.00016057	0.00069111	7	20	1950	30472	modification by symbiont of host morphology or physiology	AT5G20320|AT4G20910|AT1G01040|AT5G23570|AT1G48410|AT3G49500|AT2G25110
45944	0.00016057	0.00069111	7	20	1950	30472	positive regulation of transcription from RNA polymerase II promoter	AT3G05530|AT2G22300|AT1G09100|AT4G19600|AT4G29040|AT1G04020|AT2G20140
19005	0.00016189	0.00069618	10	40	1950	30472	SCF ubiquitin ligase complex	AT1G75950|AT4G24210|AT4G03190|AT3G62980|AT1G27340|AT3G54650|AT2G42620|AT1G21410|AT5G42190|AT5G57360
8047	0.00016406	0.00070485	14	72	1950	30472	enzyme activator activity	AT4G26500|AT3G07880|AT4G05330|AT3G60740|AT1G73500|AT4G28980|AT2G39730|AT4G24580|AT4G35560|AT5G13300|AT2G46710|AT5G54310|AT3G19770|AT3G15730
42594	0.00016454	0.00070626	25	177	1950	30472	response to starvation	AT5G23630|AT1G55180|AT3G19190|AT3G25710|AT4G02260|AT1G13300|AT1G71040|AT1G53310|AT3G62770|AT1G27320|AT5G45900|AT2G22240|AT2G02470|AT4G31877|AT3G05630|AT3G03250|AT3G18290|AT5G60410|AT1G23010|AT2G01830|AT4G29380|AT3G62980|AT1G54130|AT2G26890|AT5G17290
34285	0.00017596	0.00075458	13	64	1950	30472	response to disaccharide stimulus	AT3G04120|AT3G52430|AT3G54320|AT5G65420|AT1G31930|AT2G39990|AT4G34160|AT5G08790|AT2G01830|AT1G69780|AT1G27320|AT3G11220|AT4G38630
42401	0.00018199	0.00077898	12	56	1950	30472	cellular biogenic amine biosynthetic process	AT1G25220|AT1G29410|AT1G15110|AT4G31500|AT2G26830|AT2G16500|AT1G56430|AT5G19530|AT5G05730|AT4G34710|AT5G56080|AT5G08170
51170	0.00018199	0.00077898	12	56	1950	30472	nuclear import	AT2G46310|AT4G27950|AT4G24540|AT1G79280|AT5G17020|AT3G03110|AT5G24470|AT3G61630|AT5G19820|AT4G23750|AT5G53290|AT4G11140
16072	0.00018976	0.00081147	26	189	1950	30472	rRNA metabolic process	AT3G55620|AT3G11964|AT1G15440|AT5G16780|AT4G05410|AT2G34570|AT1G16280|AT1G31817|AT1G17690|AT5G02250|AT2G21070|AT1G48920|AT3G51800|AT5G18570|AT4G01560|AT4G27490|AT5G16750|AT1G31660|AT5G41190|AT2G17250|AT3G60360|AT1G01040|AT5G10360|AT1G08410|AT2G47990|AT2G20490
90333	0.00020496	0.00086742	5	10	1950	30472	regulation of stomatal closure	AT3G16640|AT5G13750|AT2G26650|AT5G27150|AT5G10720
10232	0.00020496	0.00086742	5	10	1950	30472	vascular transport	AT2G01950|AT1G56430|AT5G56080|AT1G14920|AT3G09070
10233	0.00020496	0.00086742	5	10	1950	30472	phloem transport	AT2G01950|AT1G56430|AT5G56080|AT1G14920|AT3G09070
80086	0.00020496	0.00086742	5	10	1950	30472	stamen filament development	AT3G15540|AT3G07220|AT1G72520|AT1G17420|AT1G14720
6368	0.00020496	0.00086742	5	10	1950	30472	RNA elongation from RNA polymerase II promoter	AT1G61040|AT3G22590|AT1G79730|AT5G50320|AT5G61150
31053	0.00020496	0.00086742	5	10	1950	30472	primary microRNA processing	AT1G01040|AT5G13010|AT2G27100|AT2G13540|AT1G09700
31597	0.00020496	0.00086742	5	10	1950	30472	cytosolic proteasome complex	AT3G05530|AT1G09100|AT4G29040|AT3G57290|AT2G20140
40020	0.00020496	0.00086742	5	10	1950	30472	regulation of meiosis	AT3G57860|AT1G25580|AT5G61960|AT3G48750|AT5G07290
165	0.00020622	0.00086742	6	15	1950	30472	MAPKKK cascade	AT4G29810|AT3G45640|AT1G09000|AT1G51660|AT3G21220|AT4G08500
8541	0.00020622	0.00086742	6	15	1950	30472	proteasome regulatory particle, lid subcomplex	AT1G64520|AT3G11270|AT5G05780|AT5G64760|AT1G20200|AT5G09900
51101	0.00020622	0.00086742	6	15	1950	30472	regulation of DNA binding	AT3G29035|AT1G74660|AT5G39610|AT3G52770|AT1G01060|AT1G04950
3950	0.00020622	0.00086742	6	15	1950	30472	NAD+ ADP-ribosyltransferase activity	AT2G35510|AT1G23550|AT3G47720|AT1G32230|AT5G62520|AT1G70440
4558	0.00020622	0.00086742	6	15	1950	30472	alpha-glucosidase activity	AT1G35580|AT5G22510|AT1G12240|AT1G56560|AT4G09510|AT1G67490
23014	0.00020622	0.00086742	6	15	1950	30472	signal transmission via phosphorylation event	AT4G29810|AT3G45640|AT1G09000|AT1G51660|AT3G21220|AT4G08500
7243	0.00020622	0.00086742	6	15	1950	30472	intracellular protein kinase cascade	AT4G29810|AT3G45640|AT1G09000|AT1G51660|AT3G21220|AT4G08500
48586	0.00020622	0.00086742	6	15	1950	30472	regulation of long-day photoperiodism, flowering	AT4G22140|AT1G08260|AT1G28520|AT1G22770|AT2G42400|AT4G26000
48658	0.00020622	0.00086742	6	15	1950	30472	tapetal layer development	AT4G39400|AT5G05690|AT1G79530|AT5G50260|AT5G07280|AT2G23140
16308	0.00020622	0.00086742	6	15	1950	30472	1-phosphatidylinositol-4-phosphate 5-kinase activity	AT3G14270|AT3G56960|AT1G77740|AT2G41210|AT2G26420|AT4G33240
46483	0.00021656	0.00091011	52	487	1950	30472	heterocycle metabolic process	AT2G39800|AT5G41480|AT4G31500|AT1G03160|AT4G05450|AT5G14220|AT1G73500|AT1G25220|AT5G10330|AT5G05980|AT3G63440|AT2G38280|AT5G37850|AT3G44880|AT5G58270|AT5G05860|AT3G10870|AT3G06300|AT3G02780|AT5G47990|AT2G40400|AT1G66340|AT2G17720|AT3G21200|AT2G43790|AT3G45640|AT3G10160|AT2G20610|AT1G70560|AT4G34740|AT5G58560|AT2G26670|AT1G10670|AT1G56430|AT5G63890|AT4G23100|AT4G24670|AT3G12670|AT5G60540|AT2G43000…
9875	0.00021712	0.00091164	11	49	1950	30472	pollen-pistil interaction	AT1G21170|AT3G10380|AT4G05410|AT1G76850|AT3G56640|AT3G49500|AT1G71820|AT3G22200|AT4G02350|AT4G24580|AT4G15570
187	0.00022588	0.00093398	4	6	1950	30472	activation of MAPK activity	AT4G29810|AT3G45640|AT1G51660|AT3G21220
212	0.00022588	0.00093398	4	6	1950	30472	meiotic spindle organization	AT5G57880|AT1G11060|AT5G19400|AT1G61030
9647	0.00022588	0.00093398	4	6	1950	30472	skotomorphogenesis	AT2G45430|AT1G64520|AT2G32950|AT2G46990
9895	0.00022588	0.00093398	4	6	1950	30472	negative regulation of catabolic process	AT2G42260|AT4G24960|AT3G57860|AT1G50030
10088	0.00022588	0.00093398	4	6	1950	30472	phloem development	AT3G01680|AT3G01670|AT3G15380|AT3G09070
18410	0.00022588	0.00093398	4	6	1950	30472	peptide or protein carboxyl-terminal blocking	AT5G23320|AT5G45900|AT5G08335|AT5G17290
10244	0.00022588	0.00093398	4	6	1950	30472	response to low fluence blue light stimulus by blue low-fluence system	AT4G08920|AT2G26300|AT1G48270|AT1G04400
10375	0.00022588	0.00093398	4	6	1950	30472	stomatal complex patterning	AT1G80180|AT5G08120|AT2G17820|AT2G15430
43406	0.00022588	0.00093398	4	6	1950	30472	positive regulation of MAP kinase activity	AT4G29810|AT3G45640|AT1G51660|AT3G21220
35279	0.00022588	0.00093398	4	6	1950	30472	mRNA cleavage involved in gene silencing by miRNA	AT2G46685|AT4G20910|AT1G01040|AT1G09700
51781	0.00022588	0.00093398	4	6	1950	30472	positive regulation of cell division	AT1G26870|AT3G23980|AT1G21410|AT5G05970
45597	0.00022588	0.00093398	4	6	1950	30472	positive regulation of cell differentiation	AT1G11130|AT2G46410|AT1G79580|AT4G32880
46030	0.00022588	0.00093398	4	6	1950	30472	inositol trisphosphate phosphatase activity	AT1G34120|AT1G05470|AT4G18010|AT1G05630
31110	0.00022588	0.00093398	4	6	1950	30472	regulation of microtubule polymerization or depolymerization	AT5G55230|AT3G16640|AT3G54870|AT5G44610
7163	0.00022588	0.00093398	4	6	1950	30472	establishment or maintenance of cell polarity	AT2G22640|AT3G54010|AT5G56270|AT5G28646
48455	0.00022588	0.00093398	4	6	1950	30472	stamen formation	AT4G39400|AT5G05690|AT5G07280|AT4G38630
16337	0.00022588	0.00093398	4	6	1950	30472	cell-cell adhesion	AT3G55830|AT2G38440|AT3G22200|AT4G24580
10099	0.00022758	0.00093767	7	21	1950	30472	regulation of photomorphogenesis	AT5G46210|AT4G02440|AT1G71230|AT5G11260|AT1G22920|AT2G46340|AT1G02330
30490	0.00022758	0.00093767	7	21	1950	30472	maturation of SSU-rRNA	AT2G17250|AT1G15440|AT1G31817|AT1G17690|AT5G16750|AT2G34570|AT5G41190
31401	0.00022758	0.00093767	7	21	1950	30472	positive regulation of protein modification process	AT4G22910|AT2G18290|AT3G24440|AT1G77300|AT1G04020|AT4G11920|AT5G55390
8154	0.00022758	0.00093767	7	21	1950	30472	actin polymerization or depolymerization	AT2G22640|AT5G54650|AT4G01710|AT5G56600|AT4G29350|AT4G30160|AT2G19760
8170	0.00024308	0.0010007	13	66	1950	30472	N-methyltransferase activity	AT2G31650|AT4G15180|AT5G24330|AT5G49020|AT4G02020|AT3G06930|AT1G76710|AT1G51450|AT5G09790|AT1G77300|AT5G42400|AT2G23380|AT1G04870
9749	0.00024995	0.0010271	10	42	1950	30472	response to glucose stimulus	AT2G19450|AT1G18080|AT1G09100|AT4G24400|AT4G15900|AT3G08550|AT1G67890|AT2G26300|AT1G31930|AT3G44290
45489	0.00024995	0.0010271	10	42	1950	30472	pectin biosynthetic process	AT3G01040|AT2G35610|AT1G02720|AT4G01220|AT1G79500|AT5G15470|AT2G32700|AT1G78240|AT1G16340|AT1G19300
5770	0.00025713	0.0010314	14	75	1950	30472	late endosome	AT2G28250|AT1G10130|AT4G31820|AT3G59420|AT4G29140|AT4G37650|AT5G06140|AT5G07120|AT5G58440|AT4G29380|AT2G27600|AT3G12400|AT5G52050|AT2G26890
6302	0.00025713	0.0010314	14	75	1950	30472	double-strand break repair	AT4G00020|AT4G31400|AT1G66740|AT5G21140|AT3G25100|AT1G66730|AT3G09660|AT1G65470|AT5G67100|AT3G15150|AT5G64630|AT4G29170|AT5G38110|AT1G04020
31301	0.00026137	0.0010314	15	84	1950	30472	integral to organelle membrane	AT1G14360|AT3G04460|AT5G27540|AT5G16910|AT1G02410|AT4G35450|AT5G03080|AT2G02810|AT3G46740|AT2G38280|AT1G53000|AT1G50460|AT2G03120|AT3G52940|AT2G26350
33206	0.00026168	0.0010314	3	3	1950	30472	cytokinesis after meiosis	AT3G43210|AT5G56580|AT4G01370
50062	0.00026168	0.0010314	3	3	1950	30472	long-chain-fatty-acyl-CoA reductase activity	AT3G44540|AT3G44550|AT5G22500
9303	0.00026168	0.0010314	3	3	1950	30472	rRNA transcription	AT4G02990|AT1G50030|AT1G17690
9663	0.00026168	0.0010314	3	3	1950	30472	plasmodesma organization	AT1G12770|AT3G08550|AT4G29860
9884	0.00026168	0.0010314	3	3	1950	30472	cytokinin receptor activity	AT2G01830|AT1G27320|AT5G35750
1736	0.00026168	0.0010314	3	3	1950	30472	establishment of planar polarity	AT1G13980|AT5G03280|AT2G38120
1738	0.00026168	0.0010314	3	3	1950	30472	morphogenesis of a polarized epithelium	AT1G13980|AT5G03280|AT2G38120
9945	0.00026168	0.0010314	3	3	1950	30472	radial axis specification	AT1G69270|AT3G02130|AT1G28560
42814	0.00026168	0.0010314	3	3	1950	30472	monopolar cell growth	AT4G36380|AT5G03540|AT1G01510
10070	0.00026168	0.0010314	3	3	1950	30472	zygote asymmetric cell division	AT1G69770|AT1G55540|AT5G49160
10086	0.00026168	0.0010314	3	3	1950	30472	embryonic root morphogenesis	AT1G08260|AT2G01830|AT1G74500
2009	0.00026168	0.0010314	3	3	1950	30472	morphogenesis of an epithelium	AT1G13980|AT5G03280|AT2G38120
10271	0.00026168	0.0010314	3	3	1950	30472	regulation of chlorophyll catabolic process	AT1G27320|AT5G35750|AT1G20780
43153	0.00026168	0.0010314	3	3	1950	30472	entrainment of circadian clock by photoperiod	AT3G26640|AT1G12910|AT5G57360
51439	0.00026168	0.0010314	3	3	1950	30472	regulation of ubiquitin-protein ligase activity involved in mitotic cell cycle	AT2G42260|AT3G57860|AT2G18290
35097	0.00026168	0.0010314	3	3	1950	30472	histone methyltransferase complex	AT3G21060|AT1G51450|AT3G49660
10599	0.00026168	0.0010314	3	3	1950	30472	production of lsiRNA involved in RNA interference	AT5G20320|AT1G01040|AT1G69440
10617	0.00026168	0.0010314	3	3	1950	30472	circadian regulation of calcium ion oscillation	AT2G18790|AT4G08920|AT1G04400
35241	0.00026168	0.0010314	3	3	1950	30472	protein-arginine omega-N monomethyltransferase activity	AT5G49020|AT1G04870|AT3G06930
51645	0.00026168	0.0010314	3	3	1950	30472	Golgi localization	AT5G20490|AT1G17580|AT5G43900
51788	0.00026168	0.0010314	3	3	1950	30472	response to misfolded protein	AT1G64520|AT4G29040|AT4G38630
60151	0.00026168	0.0010314	3	3	1950	30472	peroxisome localization	AT5G20490|AT1G17580|AT5G43900
19294	0.00026168	0.0010314	3	3	1950	30472	keto-3-deoxy-D-manno-octulosonic acid biosynthetic process	AT1G79500|AT1G53000|AT1G16340
60429	0.00026168	0.0010314	3	3	1950	30472	epithelium development	AT1G13980|AT5G03280|AT2G38120
60774	0.00026168	0.0010314	3	3	1950	30472	auxin mediated signaling pathway involved in phyllotactic patterning	AT5G65510|AT5G57390|AT5G10510
19919	0.00026168	0.0010314	3	3	1950	30472	peptidyl-arginine methylation, to asymmetrical-dimethyl arginine	AT5G49020|AT1G04870|AT3G06930
45723	0.00026168	0.0010314	3	3	1950	30472	positive regulation of fatty acid biosynthetic process	AT1G79700|AT1G16060|AT1G21970
45923	0.00026168	0.0010314	3	3	1950	30472	positive regulation of fatty acid metabolic process	AT1G79700|AT1G16060|AT1G21970
5078	0.00026168	0.0010314	3	3	1950	30472	MAP-kinase scaffold activity	AT1G18080|AT1G48630|AT3G18130
70734	0.00026168	0.0010314	3	3	1950	30472	histone H3-K27 methylation	AT5G11530|AT5G09790|AT5G24330
46400	0.00026168	0.0010314	3	3	1950	30472	keto-3-deoxy-D-manno-octulosonic acid metabolic process	AT1G79500|AT1G53000|AT1G16340
30159	0.00026168	0.0010314	3	3	1950	30472	receptor signaling complex scaffold activity	AT1G18080|AT1G48630|AT3G18130
71217	0.00026168	0.0010314	3	3	1950	30472	cellular response to external biotic stimulus	AT2G32700|AT4G32551|AT1G43850
14071	0.00026168	0.0010314	3	3	1950	30472	response to cycloalkane	AT2G32700|AT4G32551|AT1G43850
46898	0.00026168	0.0010314	3	3	1950	30472	response to cycloheximide	AT2G32700|AT4G32551|AT1G43850
80003	0.00026168	0.0010314	3	3	1950	30472	thalianol metabolic process	AT5G47990|AT5G48010|AT5G48000
7112	0.00026168	0.0010314	3	3	1950	30472	male meiosis cytokinesis	AT3G43210|AT5G56580|AT4G01370
48188	0.00026168	0.0010314	3	3	1950	30472	Set1C/COMPASS complex	AT3G21060|AT1G51450|AT3G49660
40014	0.00026168	0.0010314	3	3	1950	30472	regulation of multicellular organism growth	AT3G16640|AT1G55350|AT5G58270
7292	0.00026168	0.0010314	3	3	1950	30472	female gamete generation	AT4G29040|AT2G41500|AT2G20140
48480	0.00026168	0.0010314	3	3	1950	30472	stigma development	AT4G36260|AT3G48520|AT3G51060
48656	0.00026168	0.0010314	3	3	1950	30472	tapetal layer formation	AT4G39400|AT5G05690|AT5G07280
48657	0.00026168	0.0010314	3	3	1950	30472	tapetal cell differentiation	AT4G39400|AT5G05690|AT5G07280
48729	0.00026168	0.0010314	3	3	1950	30472	tissue morphogenesis	AT1G13980|AT5G03280|AT2G38120
16277	0.00026168	0.0010314	3	3	1950	30472	[myelin basic protein]-arginine N-methyltransferase activity	AT5G49020|AT1G04870|AT3G06930
9694	0.00027092	0.0010669	8	28	1950	30472	jasmonic acid metabolic process	AT1G55020|AT1G72520|AT3G48520|AT4G29010|AT2G35690|AT2G46370|AT1G17420|AT4G16760
45860	0.00027236	0.0010716	9	35	1950	30472	positive regulation of protein kinase activity	AT4G29810|AT3G45640|AT4G19600|AT1G09000|AT1G51660|AT5G63770|AT4G30340|AT4G21540|AT3G21220
9751	0.0002964	0.0011652	27	205	1950	30472	response to salicylic acid stimulus	AT5G17490|AT3G09600|AT3G52430|AT4G10500|AT1G66350|AT4G03550|AT2G36890|AT4G01370|AT2G46410|AT5G08790|AT2G46830|AT3G11440|AT3G48360|AT3G03450|AT3G50060|AT4G32940|AT5G47390|AT2G37630|AT1G14920|AT5G63160|AT4G35890|AT4G23810|AT1G01060|AT1G76680|AT2G01570|AT5G13170|AT5G37260
51247	0.00030535	0.0011994	12	59	1950	30472	positive regulation of protein metabolic process	AT4G22910|AT2G32950|AT2G18290|AT1G71230|AT3G24440|AT1G77300|AT1G32310|AT1G04020|AT4G11920|AT5G55390|AT2G26130|AT1G13950
5096	0.00030717	0.0012055	10	43	1950	30472	GTPase activator activity	AT4G35560|AT5G13300|AT2G46710|AT3G07880|AT5G54310|AT3G19770|AT4G05330|AT3G60740|AT3G15730|AT4G24580
6378	0.0003121	0.0012228	6	16	1950	30472	mRNA polyadenylation	AT4G04885|AT3G04680|AT5G23880|AT5G13480|AT1G17980|AT2G43410
16307	0.0003121	0.0012228	6	16	1950	30472	phosphatidylinositol phosphate kinase activity	AT3G14270|AT3G56960|AT1G77740|AT2G41210|AT2G26420|AT4G33240
6323	0.00031542	0.0012337	11	51	1950	30472	DNA packaging	AT4G22140|AT3G06400|AT5G48600|AT1G18800|AT1G74560|AT5G64630|AT5G37630|AT5G18620|AT1G65470|AT4G39100|AT5G58230
6342	0.00031542	0.0012337	11	51	1950	30472	chromatin silencing	AT3G07610|AT4G22140|AT2G30280|AT5G17690|AT1G69770|AT4G13940|AT4G16280|AT3G54560|AT2G43410|AT1G60170|AT4G39100
10224	0.00033096	0.0012923	13	68	1950	30472	response to UV-B	AT5G14170|AT5G23730|AT2G37040|AT1G32870|AT2G19520|AT4G39400|AT2G43790|AT2G42260|AT5G05690|AT1G76710|AT3G45640|AT5G11260|AT2G46370
10941	0.00033096	0.0012923	13	68	1950	30472	regulation of cell death	AT5G23670|AT3G52430|AT1G17560|AT2G13790|AT2G31170|AT2G32460|AT4G39400|AT5G39610|AT5G06100|AT1G77300|AT3G11440|AT2G46240|AT1G21750
33674	0.00034268	0.0013346	9	36	1950	30472	positive regulation of kinase activity	AT4G29810|AT3G45640|AT4G19600|AT1G09000|AT1G51660|AT5G63770|AT4G30340|AT4G21540|AT3G21220
31348	0.00034268	0.0013346	9	36	1950	30472	negative regulation of defense response	AT5G60410|AT1G20900|AT5G03280|AT4G15415|AT3G52430|AT4G29140|AT1G17980|AT2G46370|AT1G49040
31408	0.00034268	0.0013346	9	36	1950	30472	oxylipin biosynthetic process	AT1G73680|AT1G55020|AT1G72520|AT4G29010|AT2G35690|AT1G76680|AT1G17420|AT4G16760|AT3G22400
35065	0.00035593	0.0013793	5	11	1950	30472	regulation of histone acetylation	AT4G22140|AT1G04020|AT3G48430|AT5G45600|AT4G39100
35265	0.00035593	0.0013793	5	11	1950	30472	organ growth	AT5G50320|AT2G44080|AT5G13680|AT3G11220|AT5G10510
10928	0.00035593	0.0013793	5	11	1950	30472	regulation of auxin mediated signaling pathway	AT1G27340|AT5G50320|AT5G13680|AT3G11220|AT4G16340
5771	0.00035593	0.0013793	5	11	1950	30472	multivesicular body	AT5G06140|AT5G07120|AT5G58440|AT2G27600|AT3G59420
30515	0.00035593	0.0013793	5	11	1950	30472	snoRNA binding	AT1G15440|AT4G05410|AT1G17690|AT5G16750|AT2G20490
7584	0.00035593	0.0013793	5	11	1950	30472	response to nutrient	AT3G02570|AT4G03190|AT3G01090|AT2G14210|AT1G05630
16278	0.00037493	0.0014505	10	44	1950	30472	lysine N-methyltransferase activity	AT1G76710|AT2G31650|AT1G51450|AT5G09790|AT4G15180|AT1G77300|AT5G24330|AT5G42400|AT2G23380|AT4G02020
16279	0.00037493	0.0014505	10	44	1950	30472	protein-lysine N-methyltransferase activity	AT1G76710|AT2G31650|AT1G51450|AT5G09790|AT4G15180|AT1G77300|AT5G24330|AT5G42400|AT2G23380|AT4G02020
7059	0.00038419	0.0014851	13	69	1950	30472	chromosome segregation	AT5G48600|AT1G11060|AT4G31400|AT1G61030|AT1G68310|AT5G15540|AT4G22970|AT3G59550|AT5G42190|AT5G57880|AT1G75950|AT5G55300|AT5G37630
31300	0.00038785	0.0014976	15	87	1950	30472	intrinsic to organelle membrane	AT1G14360|AT3G04460|AT5G27540|AT5G16910|AT1G02410|AT4G35450|AT5G03080|AT2G02810|AT3G46740|AT2G38280|AT1G53000|AT1G50460|AT2G03120|AT3G52940|AT2G26350
6364	0.00038807	0.0014976	25	187	1950	30472	rRNA processing	AT3G55620|AT3G11964|AT1G15440|AT5G16780|AT4G05410|AT2G34570|AT1G16280|AT1G31817|AT1G17690|AT5G02250|AT2G21070|AT1G48920|AT3G51800|AT5G18570|AT4G01560|AT4G27490|AT5G16750|AT1G31660|AT5G41190|AT2G17250|AT3G60360|AT5G10360|AT1G08410|AT2G47990|AT2G20490
16757	0.00040929	0.0015782	64	649	1950	30472	transferase activity, transferring glycosyl groups	AT3G01040|AT2G36850|AT4G21060|AT5G15470|AT3G57200|AT3G08550|AT3G07020|AT4G02500|AT1G19300|AT4G03550|AT1G75120|AT5G62620|AT5G05860|AT2G25110|AT1G27600|AT4G31780|AT3G55830|AT1G32230|AT3G04240|AT1G74800|AT5G14850|AT3G62720|AT5G16910|AT1G02730|AT3G20440|AT1G74720|AT1G19360|AT5G11110|AT1G70440|AT1G05680|AT3G10320|AT4G34740|AT3G07160|AT3G02230|AT5G22740|AT1G16570|AT4G02280|AT1G33430|AT2G22900|AT4G36890…
51188	0.0004364	0.0016813	27	210	1950	30472	cofactor biosynthetic process	AT2G30490|AT1G10670|AT5G41480|AT2G34630|AT5G45940|AT1G68310|AT5G14220|AT4G23100|AT4G23660|AT1G32500|AT5G05980|AT5G60540|AT5G37850|AT3G10670|AT5G58270|AT2G28880|AT2G26060|AT3G02780|AT4G26500|AT2G40400|AT3G02280|AT5G48840|AT5G55810|AT3G21200|AT3G10160|AT2G30920|AT2G26670
724	0.00044871	0.0017258	11	53	1950	30472	double-strand break repair via homologous recombination	AT4G00020|AT4G31400|AT1G66740|AT3G15150|AT5G21140|AT3G25100|AT5G64630|AT3G09660|AT5G38110|AT1G04020|AT1G65470
6333	0.00044871	0.0017258	11	53	1950	30472	chromatin assembly or disassembly	AT4G22140|AT3G06400|AT1G18800|AT1G74560|AT1G66740|AT5G64630|AT5G38110|AT5G18620|AT1G65470|AT4G39100|AT5G58230
30244	0.00045468	0.0017473	10	45	1950	30472	cellulose biosynthetic process	AT2G35620|AT1G02730|AT3G02230|AT5G22130|AT3G08550|AT5G49720|AT5G15650|AT1G05850|AT3G29810|AT5G16910
462	0.00045628	0.0017477	6	17	1950	30472	maturation of SSU-rRNA from tricistronic rRNA transcript (SSU-rRNA, 5.8S rRNA, LSU-rRNA)	AT2G17250|AT1G15440|AT1G31817|AT1G17690|AT5G16750|AT2G34570
42285	0.00045628	0.0017477	6	17	1950	30472	xylosyltransferase activity	AT4G36890|AT4G01220|AT4G02500|AT3G62720|AT1G27600|AT1G74380
2213	0.00045628	0.0017477	6	17	1950	30472	defense response to insect	AT3G52430|AT3G48520|AT2G35690|AT1G74930|AT4G16760|AT4G23100
43631	0.00045628	0.0017477	6	17	1950	30472	RNA polyadenylation	AT4G04885|AT3G04680|AT5G23880|AT5G13480|AT1G17980|AT2G43410
9744	0.00049322	0.0018848	12	62	1950	30472	response to sucrose stimulus	AT3G04120|AT4G34160|AT5G08790|AT2G01830|AT1G69780|AT1G27320|AT3G54320|AT5G65420|AT3G11220|AT1G31930|AT2G39990|AT4G38630
10324	0.00049322	0.0018848	12	62	1950	30472	membrane invagination	AT1G13980|AT5G06140|AT5G07120|AT5G58440|AT1G60490|AT3G01780|AT5G13300|AT3G56960|AT5G45900|AT4G28880|AT2G26890|AT4G28860
32957	0.00050023	0.0018848	4	7	1950	30472	inositol trisphosphate metabolic process	AT1G34120|AT1G05470|AT4G18010|AT4G33770
266	0.00050023	0.0018848	4	7	1950	30472	mitochondrial fission	AT4G05410|AT2G14120|AT4G33650|AT1G14830
791	0.00050023	0.0018848	4	7	1950	30472	euchromatin	AT5G17690|AT3G28730|AT5G50320|AT4G10710
33588	0.00050023	0.0018848	4	7	1950	30472	Elongator holoenzyme complex	AT1G13870|AT5G50320|AT5G13680|AT3G11220
9957	0.00050023	0.0018848	4	7	1950	30472	epidermal cell fate specification	AT5G24520|AT1G55350|AT5G41315|AT5G02820
35067	0.00050023	0.0018848	4	7	1950	30472	negative regulation of histone acetylation	AT4G22140|AT1G04020|AT3G48430|AT4G39100
51765	0.00050023	0.0018848	4	7	1950	30472	inositol tetrakisphosphate kinase activity	AT5G07370|AT5G61760|AT5G42810|AT4G33770
60260	0.00050023	0.0018848	4	7	1950	30472	regulation of transcription initiation from RNA polymerase II promoter	AT3G05530|AT1G09100|AT4G29040|AT2G20140
45898	0.00050023	0.0018848	4	7	1950	30472	regulation of RNA polymerase II transcriptional preinitiation complex assembly	AT3G05530|AT1G09100|AT4G29040|AT2G20140
45899	0.00050023	0.0018848	4	7	1950	30472	positive regulation of RNA polymerase II transcriptional preinitiation complex assembly	AT3G05530|AT1G09100|AT4G29040|AT2G20140
30041	0.00050023	0.0018848	4	7	1950	30472	actin filament polymerization	AT2G22640|AT5G54650|AT4G01710|AT5G56600
31057	0.00050023	0.0018848	4	7	1950	30472	negative regulation of histone modification	AT4G22140|AT1G04020|AT3G48430|AT4G39100
7021	0.00050023	0.0018848	4	7	1950	30472	tubulin complex assembly	AT2G18390|AT1G71440|AT3G60740|AT3G10220
48015	0.00050023	0.0018848	4	7	1950	30472	phosphoinositide-mediated signaling	AT5G64070|AT1G60490|AT1G05470|AT5G63980
48496	0.00050023	0.0018848	4	7	1950	30472	maintenance of organ identity	AT1G17920|AT3G61150|AT1G05230|AT5G23150
48497	0.00050023	0.0018848	4	7	1950	30472	maintenance of floral organ identity	AT1G17920|AT3G61150|AT1G05230|AT5G23150
48766	0.00050023	0.0018848	4	7	1950	30472	root hair initiation	AT2G34650|AT1G70940|AT1G66470|AT1G48380
32451	0.00050023	0.0018848	4	7	1950	30472	demethylase activity	AT3G07610|AT1G30810|AT1G11680|AT4G20400
3779	0.00050904	0.0019165	18	118	1950	30472	actin binding	AT5G20490|AT3G28630|AT4G01710|AT3G54870|AT1G04160|AT3G27000|AT2G38440|AT5G56600|AT4G29350|AT5G35700|AT2G19760|AT1G31810|AT1G30825|AT5G54650|AT1G17580|AT1G13180|AT4G30160|AT5G43900
51338	0.00051271	0.0019287	13	71	1950	30472	regulation of transferase activity	AT4G29810|AT1G09000|AT5G63770|AT4G21540|AT3G21220|AT4G28980|AT2G23430|AT3G45640|AT4G19600|AT1G51660|AT5G04470|AT4G30340|AT3G48360
19932	0.00052843	0.0019862	9	38	1950	30472	second-messenger-mediated signaling	AT5G64070|AT1G60490|AT4G17615|AT1G02900|AT1G05470|AT5G63980|AT2G26300|AT1G31930|AT4G03560
6606	0.00053129	0.0019937	11	54	1950	30472	protein import into nucleus	AT2G46310|AT4G27950|AT4G24540|AT1G79280|AT5G17020|AT3G03110|AT3G61630|AT5G19820|AT4G23750|AT5G53290|AT4G11140
15629	0.00053129	0.0019937	11	54	1950	30472	actin cytoskeleton	AT1G30825|AT5G20490|AT4G01710|AT1G17580|AT1G04160|AT3G27000|AT1G13180|AT5G56600|AT4G29350|AT2G19760|AT5G43900
16036	0.00053337	0.0019999	16	99	1950	30472	cellular response to phosphate starvation	AT5G23630|AT4G31877|AT1G55180|AT3G05630|AT3G03250|AT3G25710|AT1G13300|AT5G60410|AT1G23010|AT2G01830|AT1G71040|AT1G53310|AT1G27320|AT3G62980|AT2G22240|AT2G02470
42254	0.00055449	0.0020765	39	350	1950	30472	ribosome biogenesis	AT3G55620|AT3G53020|AT3G11964|AT1G15440|AT5G16780|AT4G05410|AT1G67120|AT3G20780|AT2G34570|AT1G18080|AT1G16280|AT1G31817|AT1G17690|AT5G02250|AT2G21070|AT1G48920|AT3G47450|AT3G07050|AT1G02780|AT3G51800|AT5G18570|AT3G55510|AT4G01560|AT4G27490|AT5G16750|AT2G34260|AT3G25520|AT1G31660|AT5G41190|AT2G17250|AT3G60360|AT1G48630|AT5G39740|AT5G10360|AT1G08410|AT1G75350|AT4G34620|AT2G47990|AT2G20490
12501	0.00055468	0.0020765	17	109	1950	30472	programmed cell death	AT3G54420|AT4G08920|AT1G32230|AT3G52430|AT5G48030|AT5G22290|AT3G21220|AT4G03110|AT2G43790|AT5G02190|AT3G45640|AT3G62770|AT1G51660|AT5G64930|AT5G50260|AT3G27060|AT4G38740
6721	0.00055731	0.0020846	20	139	1950	30472	terpenoid metabolic process	AT2G32440|AT1G10670|AT2G26170|AT5G47990|AT5G45340|AT1G05160|AT1G80340|AT4G32810|AT1G30100|AT5G61780|AT5G48010|AT5G48000|AT2G18790|AT1G77300|AT5G13790|AT2G48120|AT2G07050|AT4G19230|AT5G58560|AT2G26670
45786	0.00057167	0.0021349	7	24	1950	30472	negative regulation of cell cycle	AT4G37650|AT2G42260|AT1G79280|AT2G23430|AT3G57860|AT5G04470|AT4G05440
30865	0.00057167	0.0021349	7	24	1950	30472	cortical cytoskeleton organization	AT5G08120|AT5G55230|AT1G80350|AT3G44200|AT5G49720|AT5G44610|AT4G01370
45859	0.00057425	0.0021396	12	63	1950	30472	regulation of protein kinase activity	AT4G29810|AT2G23430|AT3G45640|AT4G19600|AT1G09000|AT1G51660|AT5G04470|AT5G63770|AT4G30340|AT4G21540|AT3G21220|AT4G28980
8353	0.00057802	0.0021396	5	12	1950	30472	RNA polymerase II carboxy-terminal domain kinase activity	AT5G64960|AT3G48750|AT5G10270|AT4G28980|AT3G54180
51325	0.00057802	0.0021396	5	12	1950	30472	interphase	AT3G12280|AT4G34160|AT2G23430|AT3G18730|AT1G80260
51340	0.00057802	0.0021396	5	12	1950	30472	regulation of ligase activity	AT2G42260|AT3G57860|AT4G22910|AT2G18290|AT4G11920
51438	0.00057802	0.0021396	5	12	1950	30472	regulation of ubiquitin-protein ligase activity	AT2G42260|AT3G57860|AT4G22910|AT2G18290|AT4G11920
35064	0.00057802	0.0021396	5	12	1950	30472	methylated histone residue binding	AT4G22140|AT5G17690|AT4G30200|AT2G02470|AT4G39100
4630	0.00057802	0.0021396	5	12	1950	30472	phospholipase D activity	AT1G55180|AT3G05630|AT4G11850|AT3G16785|AT3G15730
70290	0.00057802	0.0021396	5	12	1950	30472	NAPE-specific phospholipase D activity	AT1G55180|AT3G05630|AT4G11850|AT3G16785|AT3G15730
46885	0.00057802	0.0021396	5	12	1950	30472	regulation of hormone biosynthetic process	AT1G25220|AT3G08510|AT2G45400|AT5G05730|AT1G68130
55088	0.00057802	0.0021396	5	12	1950	30472	lipid homeostasis	AT2G35690|AT3G51840|AT4G16760|AT3G06810|AT3G57280
[truncated: 836 more rows]
[truncated: 205 more columns]
