# Supplementary material for: H3K27me3 epigenetic mark crucial for callus cell identity and regeneration capacity
Source: Research Square preprint supplement (doi:10.21203/rs.3.rs-5582331/v1), 2025-01-24
Supplement: Supplementary file 9 [file ae6901dc4f72b69fd65cf231.xlsx]

## Sheet: GO full raw
Table 4. Gene Ontology analysis on the 438 down-regulated genes in emf2 callus compared with WT callus
File created with bingo (c)
ontology: namespace
curator: bingo
Selected ontology file : bundle://113.0:1/data/GO_Full
Selected annotation file : bundle://113.0:1/data/A_thaliana_default
Discarded evidence codes :
Overrepresentation
Selected statistical test : Hypergeometric test
Selected correction : Benjamini & Hochberg False Discovery Rate (FDR) correction
Selected significance level : 0.05
Testing option : Use whole annotation as reference set
The selected cluster :
AT5G43980	AT5G63350	AT2G14100	AT5G19875	AT3G53480	AT4G24570	AT2G37100	AT4G39940	AT1G61800	AT2G05620	AT2G24260	AT2G28500	AT4G37400	AT4G34131	AT4G04830	AT1G07390	AT4G27850	AT4G02770	AT3G53130	AT3G06020	AT5G65640	AT1G67470	AT3G53370	AT4G27970	AT1G10585	AT1G02810	AT2G25460	AT2G40610	AT1G30040	AT3G21790	AT1G71500	AT4G26890	AT1G67480	AT5G24080	AT5G54770	AT1G20350	AT1G53035	AT5G06530	AT1G19250	AT2G30930	AT2G02250	AT5G13180	AT4G10380	AT1G08380	AT4G00210	AT1G12980	AT3G53470	AT1G80450	AT2G45080	AT1G35720
AT4G34710	AT5G56270	AT1G06520	AT5G66190	AT3G50760	AT3G02480	AT5G23660	AT4G04490	AT3G27400	AT5G13630	AT5G13990	AT1G06990	AT3G48690	AT3G49580	AT2G34430	AT5G61890	AT5G06080	AT5G11420	AT3G18950	AT5G56050	AT2G20260	AT1G63750	AT2G47630	AT3G61470	AT2G18060	AT2G01990	AT5G57390	AT1G05320	AT5G40720	AT5G58120	AT4G17660	AT4G04223	AT2G34655	AT5G49300	AT1G17420	AT2G44450	AT2G24762	AT1G28670	AT4G31000	AT5G59220	AT5G01840	AT2G34420	AT5G20230	AT3G26470	AT3G50440	AT1G06680	AT3G28899	AT5G07280	AT4G04570	AT5G11410
No annotations were retrieved for the following entities:
AT3G20300	AT5G57780	AT2G44370	AT1G08440	AT2G01422	AT5G17650	AT3G28899	AT4G35510	AT5G21280	AT2G15040	AT5G42280
GO-ID	p-value	corr p-value	x	n	X	N	Description	Genes in test set
9535	1.9602e-35	1.327e-32	43	211	438	27594	chloroplast thylakoid membrane	AT2G34430|AT1G61520|AT4G04640|AT4G21280|AT1G30380|AT2G06520|AT1G67740|AT1G71500|AT4G12800|AT3G21055|AT1G31330|AT4G27440|AT1G15820|AT2G30570|AT4G01050|AT4G28750|AT1G29920|AT4G10340|AT4G05180|AT2G05620|AT1G54780|AT3G51820|AT3G26070|AT3G47470|AT2G20260|AT1G79040|AT5G54270|AT3G56940|AT2G34420|AT4G02770|AT3G26650|AT5G66190|AT1G06680|AT1G55670|AT4G17600|AT1G29930|AT3G61470|AT3G16140|AT1G52230|AT3G26060…
55035	1.9602e-35	1.327e-32	43	211	438	27594	plastid thylakoid membrane	AT2G34430|AT1G61520|AT4G04640|AT4G21280|AT1G30380|AT2G06520|AT1G67740|AT1G71500|AT4G12800|AT3G21055|AT1G31330|AT4G27440|AT1G15820|AT2G30570|AT4G01050|AT4G28750|AT1G29920|AT4G10340|AT4G05180|AT2G05620|AT1G54780|AT3G51820|AT3G26070|AT3G47470|AT2G20260|AT1G79040|AT5G54270|AT3G56940|AT2G34420|AT4G02770|AT3G26650|AT5G66190|AT1G06680|AT1G55670|AT4G17600|AT1G29930|AT3G61470|AT3G16140|AT1G52230|AT3G26060…
34357	3.0505e-35	1.3768e-32	44	227	438	27594	photosynthetic membrane	AT2G34430|AT1G61520|AT4G04640|AT4G21280|AT1G30380|AT2G06520|AT1G67740|AT1G71500|AT4G12800|AT3G21055|AT1G31330|AT4G27440|AT1G15820|AT2G30570|AT4G01050|AT4G28750|AT1G29920|AT4G10340|AT4G05180|AT2G05620|AT1G54780|AT3G51820|AT3G26070|AT3G47470|AT2G20260|AT1G79040|AT5G54270|AT1G08380|AT3G56940|AT2G34420|AT4G02770|AT3G26650|AT5G66190|AT1G06680|AT1G55670|AT4G17600|AT1G29930|AT3G61470|AT3G16140|AT1G52230…
42651	2.8562e-34	9.6682e-32	43	224	438	27594	thylakoid membrane	AT2G34430|AT1G61520|AT4G04640|AT4G21280|AT1G30380|AT2G06520|AT1G67740|AT1G71500|AT4G12800|AT3G21055|AT1G31330|AT4G27440|AT1G15820|AT2G30570|AT4G01050|AT4G28750|AT1G29920|AT4G10340|AT4G05180|AT2G05620|AT1G54780|AT3G51820|AT3G26070|AT3G47470|AT2G20260|AT1G79040|AT5G54270|AT3G56940|AT2G34420|AT4G02770|AT3G26650|AT5G66190|AT1G06680|AT1G55670|AT4G17600|AT1G29930|AT3G61470|AT3G16140|AT1G52230|AT3G26060…
44436	2.6692e-33	7.2281e-31	45	266	438	27594	thylakoid part	AT2G34430|AT1G61520|AT4G04640|AT4G21280|AT1G30380|AT2G06520|AT1G67740|AT1G71500|AT4G12800|AT3G21055|AT1G31330|AT4G27440|AT1G15820|AT2G30570|AT4G01050|AT4G28750|AT1G29920|AT4G10340|AT4G05180|AT2G05620|AT1G54780|AT3G51820|AT3G26070|AT3G47470|AT2G20260|AT1G79040|AT5G54270|AT1G08380|AT3G56940|AT2G34420|AT4G02770|AT3G26650|AT5G66190|AT1G06680|AT1G55670|AT4G17600|AT1G29930|AT3G61470|AT3G16140|AT1G52230…
31976	4.9063e-33	8.8036e-31	44	254	438	27594	plastid thylakoid	AT2G34430|AT1G61520|AT4G04640|AT4G21280|AT1G30380|AT2G06520|AT1G67740|AT1G71500|AT4G12800|AT3G21055|AT1G31330|AT4G27440|AT1G15820|AT2G30570|AT4G01050|AT4G28750|AT1G29920|AT4G10340|AT4G05180|AT2G05620|AT1G54780|AT3G51820|AT3G26070|AT3G47470|AT2G20260|AT1G79040|AT5G54270|AT3G56940|AT2G34420|AT4G02770|AT3G26650|AT5G66190|AT1G06680|AT1G55670|AT4G17600|AT1G29930|AT3G61470|AT3G16140|AT1G52230|AT1G20340…
9534	4.9063e-33	8.8036e-31	44	254	438	27594	chloroplast thylakoid	AT2G34430|AT1G61520|AT4G04640|AT4G21280|AT1G30380|AT2G06520|AT1G67740|AT1G71500|AT4G12800|AT3G21055|AT1G31330|AT4G27440|AT1G15820|AT2G30570|AT4G01050|AT4G28750|AT1G29920|AT4G10340|AT4G05180|AT2G05620|AT1G54780|AT3G51820|AT3G26070|AT3G47470|AT2G20260|AT1G79040|AT5G54270|AT3G56940|AT2G34420|AT4G02770|AT3G26650|AT5G66190|AT1G06680|AT1G55670|AT4G17600|AT1G29930|AT3G61470|AT3G16140|AT1G52230|AT1G20340…
15979	5.2015e-33	8.8036e-31	33	113	438	27594	photosynthesis	AT2G34430|AT1G61520|AT4G04640|AT1G30380|AT2G06520|AT1G67740|AT4G12800|AT1G31330|AT1G15820|AT4G01050|AT1G29920|AT4G10340|AT1G61800|AT2G05620|AT1G54780|AT3G47470|AT2G20260|AT1G79040|AT5G54270|AT1G08380|AT3G56940|AT2G34420|AT4G02770|AT3G26650|AT5G66190|AT1G06680|AT1G55670|AT1G29930|AT3G61470|AT3G16140|AT1G52230|AT3G50820|AT1G29910
31984	6.9665e-33	1.0481e-30	44	256	438	27594	organelle subcompartment	AT2G34430|AT1G61520|AT4G04640|AT4G21280|AT1G30380|AT2G06520|AT1G67740|AT1G71500|AT4G12800|AT3G21055|AT1G31330|AT4G27440|AT1G15820|AT2G30570|AT4G01050|AT4G28750|AT1G29920|AT4G10340|AT4G05180|AT2G05620|AT1G54780|AT3G51820|AT3G26070|AT3G47470|AT2G20260|AT1G79040|AT5G54270|AT3G56940|AT2G34420|AT4G02770|AT3G26650|AT5G66190|AT1G06680|AT1G55670|AT4G17600|AT1G29930|AT3G61470|AT3G16140|AT1G52230|AT1G20340…
9579	7.7864e-33	1.0543e-30	48	322	438	27594	thylakoid	AT2G34430|AT1G61520|AT4G04640|AT4G21280|AT1G30380|AT2G06520|AT1G67740|AT5G14780|AT1G71500|AT4G12800|AT3G21055|AT1G31330|AT4G27440|AT1G15820|AT2G30570|AT4G01050|AT4G28750|AT1G29920|AT4G10340|AT4G05180|AT5G54770|AT2G05620|AT1G54780|AT3G51820|AT3G26070|AT3G47470|AT2G20260|AT1G79040|AT5G54270|AT1G08380|AT3G56940|AT2G34420|AT4G02770|AT3G26650|AT5G66190|AT1G06680|AT1G55670|AT1G35720|AT4G17600|AT1G29930…
9521	9.4018e-27	1.1573e-24	20	38	438	27594	photosystem	AT1G08380|AT4G02770|AT4G21280|AT1G30380|AT1G06680|AT1G67740|AT1G55670|AT4G12800|AT3G21055|AT1G31330|AT1G15820|AT4G28750|AT4G10340|AT4G05180|AT3G61470|AT3G16140|AT1G52230|AT3G50820|AT2G20260|AT1G79040
44434	1.6549e-22	1.8672e-20	56	755	438	27594	chloroplast part	AT2G34430|AT1G61520|AT4G04640|AT1G30380|AT2G06520|AT1G67740|AT3G21055|AT4G27440|AT1G15820|AT4G01050|AT4G05180|AT2G24820|AT2G05620|AT1G54780|AT2G29630|AT3G51820|AT3G26070|AT3G47470|AT2G20260|AT1G79040|AT5G54270|AT4G02770|AT3G53130|AT3G26650|AT5G19940|AT3G61470|AT3G16140|AT1G52230|AT3G61870|AT1G20340|AT3G26060|AT3G50820|AT1G29910|AT4G21280|AT1G71500|AT4G12800|AT1G31330|AT2G30570|AT4G28750|AT2G47400…
44435	8.8424e-22	9.2097e-20	56	782	438	27594	plastid part	AT2G34430|AT1G61520|AT4G04640|AT1G30380|AT2G06520|AT1G67740|AT3G21055|AT4G27440|AT1G15820|AT4G01050|AT4G05180|AT2G24820|AT2G05620|AT1G54780|AT2G29630|AT3G51820|AT3G26070|AT3G47470|AT2G20260|AT1G79040|AT5G54270|AT4G02770|AT3G53130|AT3G26650|AT5G19940|AT3G61470|AT3G16140|AT1G52230|AT3G61870|AT1G20340|AT3G26060|AT3G50820|AT1G29910|AT4G21280|AT1G71500|AT4G12800|AT1G31330|AT2G30570|AT4G28750|AT2G47400…
9522	1.314e-17	1.2708e-15	11	15	438	27594	photosystem I	AT1G08380|AT4G02770|AT3G61470|AT1G30380|AT3G16140|AT1G55670|AT1G52230|AT4G12800|AT1G31330|AT4G28750|AT2G20260
10287	1.3014e-16	1.1747e-14	16	55	438	27594	plastoglobule	AT2G34420|AT2G34430|AT4G02770|AT1G61520|AT4G12800|AT1G31330|AT1G15820|AT4G28750|AT4G10340|AT1G52230|AT3G26070|AT3G47470|AT3G26060|AT3G50820|AT2G20260|AT1G29910
19684	1.4324e-15	1.2122e-13	16	63	438	27594	photosynthesis, light reaction	AT1G08380|AT2G34420|AT2G34430|AT1G61520|AT4G04640|AT5G66190|AT1G06680|AT1G55670|AT4G12800|AT4G01050|AT3G61470|AT2G05620|AT1G54780|AT3G50820|AT1G79040|AT1G29910
9507	1.6198e-14	1.2901e-12	80	2070	438	27594	chloroplast	AT1G10370|AT2G34430|AT2G39800|AT3G03660|AT1G61520|AT4G04640|AT1G30380|AT2G06520|AT1G67740|AT5G14780|AT3G21055|AT4G27440|AT3G04510|AT1G15820|AT4G01050|AT4G39940|AT4G05180|AT1G73860|AT2G24820|AT2G05620|AT1G54780|AT4G35985|AT2G29630|AT3G51820|AT2G28500|AT3G26070|AT3G47470|AT2G29670|AT2G20260|AT1G79040|AT5G54270|AT4G02770|AT3G53130|AT5G14370|AT3G26650|AT3G24430|AT5G19940|AT3G61470|AT5G62530|AT3G16140…
9536	9.3417e-14	7.027e-12	80	2139	438	27594	plastid	AT1G10370|AT2G34430|AT2G39800|AT3G03660|AT1G61520|AT4G04640|AT1G30380|AT2G06520|AT1G67740|AT5G14780|AT3G21055|AT4G27440|AT3G04510|AT1G15820|AT4G01050|AT4G39940|AT4G05180|AT1G73860|AT2G24820|AT2G05620|AT1G54780|AT4G35985|AT2G29630|AT3G51820|AT2G28500|AT3G26070|AT3G47470|AT2G29670|AT2G20260|AT1G79040|AT5G54270|AT4G02770|AT3G53130|AT5G14370|AT3G26650|AT3G24430|AT5G19940|AT3G61470|AT5G62530|AT3G16140…
30076	3.7072e-13	2.6419e-11	10	22	438	27594	light-harvesting complex	AT2G34420|AT1G29920|AT2G34430|AT1G29930|AT4G10340|AT3G61470|AT1G61520|AT3G47470|AT1G29910|AT5G54270
16168	6.4693e-13	4.3797e-11	10	23	438	27594	chlorophyll binding	AT2G34420|AT1G29920|AT2G34430|AT1G29930|AT4G10340|AT3G61470|AT1G61520|AT3G47470|AT1G15820|AT1G29910
9538	1.5455e-12	9.9649e-11	7	8	438	27594	photosystem I reaction center	AT4G02770|AT3G16140|AT1G52230|AT4G12800|AT1G31330|AT4G28750|AT2G20260
9523	3.0269e-11	1.8629e-09	9	23	438	27594	photosystem II	AT4G10340|AT4G05180|AT4G21280|AT1G06680|AT1G67740|AT3G21055|AT1G15820|AT3G50820|AT1G79040
44446	7.7939e-10	4.5844e-08	67	1970	438	27594	intracellular organelle part	AT2G34430|AT1G61520|AT4G04640|AT1G30380|AT2G06520|AT1G63020|AT1G67740|AT3G21055|AT4G27440|AT4G24570|AT1G15820|AT4G01050|AT4G05180|AT5G64960|AT1G73860|AT2G24820|AT2G05620|AT1G54780|AT2G29630|AT3G51820|AT3G26070|AT3G47470|AT2G20260|AT1G79040|AT5G54270|AT4G02770|AT3G53130|AT3G26650|AT5G19940|AT3G61470|AT3G16140|AT1G52230|AT4G21710|AT3G61870|AT1G20340|AT3G26060|AT3G50820|AT1G29910|AT4G21280|AT1G71500…
44422	8.126e-10	4.5844e-08	67	1972	438	27594	organelle part	AT2G34430|AT1G61520|AT4G04640|AT1G30380|AT2G06520|AT1G63020|AT1G67740|AT3G21055|AT4G27440|AT4G24570|AT1G15820|AT4G01050|AT4G05180|AT5G64960|AT1G73860|AT2G24820|AT2G05620|AT1G54780|AT2G29630|AT3G51820|AT3G26070|AT3G47470|AT2G20260|AT1G79040|AT5G54270|AT4G02770|AT3G53130|AT3G26650|AT5G19940|AT3G61470|AT3G16140|AT1G52230|AT4G21710|AT3G61870|AT1G20340|AT3G26060|AT3G50820|AT1G29910|AT4G21280|AT1G71500…
16020	1.4528e-09	7.8683e-08	103	3727	438	27594	membrane	AT1G60030|AT2G39800|AT5G41280|AT1G61520|AT1G67740|AT5G43980|AT3G53480|AT4G27440|AT4G24570|AT4G01050|AT4G21903|AT5G61730|AT1G61800|AT2G05620|AT1G54780|AT3G47470|AT1G79040|AT4G02770|AT3G26490|AT1G65730|AT3G26650|AT4G27970|AT5G41290|AT1G52230|AT3G50820|AT1G29910|AT5G49900|AT1G71500|AT4G22730|AT2G32270|AT5G45380|AT1G20350|AT1G19250|AT1G28230|AT3G13520|AT4G10380|AT1G06520|AT1G08380|AT5G66190|AT1G55670…
6091	2.2032e-09	1.1474e-07	18	199	438	27594	generation of precursor metabolites and energy	AT1G08380|AT2G34420|AT2G34430|AT1G61520|AT4G04640|AT3G26650|AT5G66190|AT1G06680|AT1G55670|AT4G12800|AT4G01050|AT5G58330|AT3G61470|AT2G05620|AT1G54780|AT3G50820|AT1G79040|AT1G29910
9526	7.6822e-09	3.8525e-07	24	382	438	27594	plastid envelope	AT3G56940|AT2G34430|AT3G53130|AT4G04640|AT3G26650|AT5G66190|AT1G06680|AT1G55670|AT1G71500|AT4G12800|AT3G16290|AT5G19940|AT1G31330|AT4G27440|AT1G15820|AT4G01050|AT5G13630|AT5G54770|AT3G16240|AT2G24820|AT3G61870|AT3G47470|AT3G26060|AT2G47450
50896	1.0544e-08	5.0989e-07	90	3207	438	27594	response to stimulus	AT2G39800|AT1G63020|AT5G14780|AT5G61890|AT5G59845|AT5G19875|AT3G53480|AT4G27440|AT1G12950|AT1G15820|AT4G01050|AT2G39200|AT1G74430|AT4G21903|AT1G26870|AT3G47710|AT5G54230|AT5G64960|AT1G61800|AT2G05620|AT2G29630|AT3G50970|AT1G09530|AT5G03720|AT5G58670|AT4G34131|AT3G54420|AT3G03670|AT1G20900|AT3G26490|AT5G50720|AT3G26650|AT2G35930|AT1G18100|AT1G71697|AT5G62530|AT2G18060|AT3G13750|AT1G20340|AT5G58120…
9941	1.2201e-08	5.6965e-07	23	361	438	27594	chloroplast envelope	AT3G56940|AT2G34430|AT3G53130|AT4G04640|AT5G66190|AT1G06680|AT1G55670|AT1G71500|AT4G12800|AT3G16290|AT5G19940|AT1G31330|AT4G27440|AT1G15820|AT4G01050|AT5G13630|AT5G54770|AT3G16240|AT2G24820|AT3G61870|AT3G47470|AT3G26060|AT2G47450
9765	1.889e-08	8.5257e-07	7	21	438	27594	photosynthesis, light harvesting	AT1G08380|AT2G34420|AT2G34430|AT3G61470|AT1G61520|AT1G54780|AT1G29910
44425	2.4461e-08	1.0684e-06	43	1098	438	27594	membrane part	AT5G41280|AT5G49900|AT4G04640|AT4G21280|AT1G30380|AT1G67740|AT3G06470|AT5G43980|AT4G12800|AT3G21055|AT1G31330|AT2G32270|AT1G15820|AT4G28750|AT4G36010|AT4G10340|AT4G05180|AT1G20350|AT1G19250|AT1G28230|AT2G47160|AT3G13520|AT4G10380|AT2G20260|AT1G79040|AT1G08380|AT5G20230|AT4G02770|AT3G05155|AT1G06680|AT1G55670|AT5G23660|AT4G09420|AT4G27970|AT5G41290|AT1G66090|AT3G60160|AT3G61470|AT3G16140|AT1G52230…
30095	1.3815e-07	5.8454e-06	6	17	438	27594	chloroplast photosystem II	AT4G05180|AT4G21280|AT1G06680|AT1G67740|AT3G21055|AT3G50820
5618	2.3208e-07	9.5224e-06	24	458	438	27594	cell wall	AT3G54420|AT3G03670|AT2G28470|AT3G54400|AT4G02330|AT2G41800|AT5G43980|AT5G25460|AT1G35720|AT2G16430|AT1G14720|AT2G38870|AT2G44450|AT1G53830|AT1G21670|AT1G02810|AT2G25630|AT2G38380|AT3G47400|AT3G16240|AT3G13750|AT2G47550|AT1G78060|AT4G39640
30312	2.7173e-07	1.0821e-05	24	462	438	27594	external encapsulating structure	AT3G54420|AT3G03670|AT2G28470|AT3G54400|AT4G02330|AT2G41800|AT5G43980|AT5G25460|AT1G35720|AT2G16430|AT1G14720|AT2G38870|AT2G44450|AT1G53830|AT1G21670|AT1G02810|AT2G25630|AT2G38380|AT3G47400|AT3G16240|AT3G13750|AT2G47550|AT1G78060|AT4G39640
46906	5.0305e-07	1.9461e-05	19	314	438	27594	tetrapyrrole binding	AT3G48280|AT3G03670|AT2G34420|AT2G34430|AT1G61520|AT1G13110|AT3G59400|AT2G14100|AT1G15820|AT1G29920|AT1G29930|AT4G10340|AT3G20100|AT3G61470|AT2G38380|AT3G48520|AT3G47470|AT4G37400|AT1G29910
31967	8.5334e-07	3.0667e-05	27	601	438	27594	organelle envelope	AT2G34430|AT4G04640|AT1G71500|AT4G12800|AT1G31330|AT4G27440|AT4G24570|AT1G15820|AT4G01050|AT5G54770|AT1G20350|AT2G22500|AT2G24820|AT3G47470|AT3G56940|AT3G53130|AT3G26650|AT5G66190|AT1G06680|AT1G55670|AT3G16290|AT5G19940|AT5G13630|AT3G16240|AT3G61870|AT3G26060|AT2G47450
31975	8.5334e-07	3.0667e-05	27	601	438	27594	envelope	AT2G34430|AT4G04640|AT1G71500|AT4G12800|AT1G31330|AT4G27440|AT4G24570|AT1G15820|AT4G01050|AT5G54770|AT1G20350|AT2G22500|AT2G24820|AT3G47470|AT3G56940|AT3G53130|AT3G26650|AT5G66190|AT1G06680|AT1G55670|AT3G16290|AT5G19940|AT5G13630|AT3G16240|AT3G61870|AT3G26060|AT2G47450
9505	8.6068e-07	3.0667e-05	14	180	438	27594	plant-type cell wall	AT3G03670|AT3G54400|AT2G41800|AT5G43980|AT5G25460|AT2G16430|AT2G44450|AT1G53830|AT1G21670|AT2G25630|AT2G38380|AT3G16240|AT3G13750|AT4G39640
44444	1.419e-06	4.7584e-05	104	4323	438	27594	cytoplasmic part	AT2G39800|AT3G03660|AT1G61520|AT1G67740|AT4G27440|AT3G04510|AT4G24570|AT4G01050|AT4G39940|AT5G64960|AT1G73860|AT2G24820|AT2G05620|AT1G54780|AT4G35985|AT2G28500|AT1G23800|AT3G47470|AT2G29670|AT1G79040|AT4G04830|AT4G02770|AT3G53130|AT3G26650|AT5G62530|AT1G52230|AT3G50820|AT1G29910|AT4G16770|AT1G71500|AT4G22570|AT2G47400|AT5G54770|AT1G20350|AT1G19250|AT1G06520|AT1G08380|AT1G12980|AT5G66190|AT1G55670…
43231	1.4273e-06	4.7584e-05	130	5766	438	27594	intracellular membrane-bounded organelle	AT2G39800|AT3G03660|AT1G61520|AT1G63020|AT1G67740|AT4G27440|AT3G04510|AT4G24570|AT4G01050|AT4G39940|AT1G26870|AT5G60120|AT5G64960|AT1G73860|AT2G24820|AT2G05620|AT1G54780|AT4G35985|AT2G24260|AT5G50670|AT2G28500|AT1G23800|AT5G03720|AT3G47470|AT2G29670|AT1G79040|AT4G02770|AT3G53130|AT3G26650|AT1G18100|AT5G65640|AT3G53370|AT1G10585|AT5G62530|AT1G52230|AT4G30980|AT3G50820|AT1G29910|AT4G16770|AT1G71500…
43227	1.4409e-06	4.7584e-05	130	5767	438	27594	membrane-bounded organelle	AT2G39800|AT3G03660|AT1G61520|AT1G63020|AT1G67740|AT4G27440|AT3G04510|AT4G24570|AT4G01050|AT4G39940|AT1G26870|AT5G60120|AT5G64960|AT1G73860|AT2G24820|AT2G05620|AT1G54780|AT4G35985|AT2G24260|AT5G50670|AT2G28500|AT1G23800|AT5G03720|AT3G47470|AT2G29670|AT1G79040|AT4G02770|AT3G53130|AT3G26650|AT1G18100|AT5G65640|AT3G53370|AT1G10585|AT5G62530|AT1G52230|AT4G30980|AT3G50820|AT1G29910|AT4G16770|AT1G71500…
16491	1.6244e-06	5.2368e-05	44	1326	438	27594	oxidoreductase activity	AT2G39800|AT1G12130|AT5G16980|AT1G30040|AT5G14780|AT1G71500|AT5G16960|AT2G14100|AT1G17420|AT4G27440|AT5G58330|AT1G19250|AT2G38380|AT2G26500|AT5G01040|AT2G24820|AT3G48520|AT1G23800|AT1G74470|AT4G37400|AT4G04830|AT3G48280|AT3G56940|AT3G03670|AT3G53130|AT5G43450|AT1G13110|AT5G16010|AT3G26650|AT5G66190|AT1G12140|AT1G35720|AT5G16970|AT2G38240|AT1G30730|AT4G36220|AT4G37990|AT3G20100|AT5G62530|AT4G36380…
44464	1.7872e-06	5.4998e-05	228	11708	438	27594	cell part	AT1G60030|AT3G03660|AT5G43980|AT2G14100|AT3G53480|AT3G04510|AT4G24570|AT4G39940|AT5G61730|AT5G54075|AT2G24820|AT1G61800|AT2G05620|AT2G24260|AT2G28500|AT5G03720|AT3G47470|AT4G34131|AT4G04830|AT3G03670|AT4G02770|AT3G53130|AT1G65730|AT5G50720|AT3G26650|AT5G65640|AT3G53370|AT4G27970|AT1G10585|AT1G30730|AT2G43590|AT1G02810|AT3G12145|AT2G40610|AT1G71500|AT4G22730|AT3G25597|AT5G45380|AT1G53830|AT5G54770…
5623	1.7872e-06	5.4998e-05	228	11708	438	27594	cell	AT1G60030|AT3G03660|AT5G43980|AT2G14100|AT3G53480|AT3G04510|AT4G24570|AT4G39940|AT5G61730|AT5G54075|AT2G24820|AT1G61800|AT2G05620|AT2G24260|AT2G28500|AT5G03720|AT3G47470|AT4G34131|AT4G04830|AT3G03670|AT4G02770|AT3G53130|AT1G65730|AT5G50720|AT3G26650|AT5G65640|AT3G53370|AT4G27970|AT1G10585|AT1G30730|AT2G43590|AT1G02810|AT3G12145|AT2G40610|AT1G71500|AT4G22730|AT3G25597|AT5G45380|AT1G53830|AT5G54770…
15995	2.2851e-06	6.8756e-05	6	26	438	27594	chlorophyll biosynthetic process	AT3G56940|AT5G13630|AT3G59400|AT3G51820|AT4G27440|AT1G74470
46148	2.5661e-06	7.5532e-05	9	76	438	27594	pigment biosynthetic process	AT3G56940|AT3G53130|AT5G13630|AT3G59400|AT3G51820|AT1G06000|AT4G27440|AT1G74470|AT4G22570
18130	2.6239e-06	7.5591e-05	11	120	438	27594	heterocycle biosynthetic process	AT3G56940|AT2G39800|AT5G13630|AT5G54770|AT1G56430|AT3G59400|AT2G29630|AT3G51820|AT4G27440|AT1G74470|AT4G22570
42221	5.0027e-06	0.00014112	51	1710	438	27594	response to chemical stimulus	AT2G39800|AT1G63020|AT5G14780|AT5G59845|AT5G19875|AT3G53480|AT4G27440|AT1G12950|AT1G74430|AT4G21903|AT1G26870|AT5G54230|AT1G61800|AT2G05620|AT2G29630|AT3G50970|AT1G09530|AT5G03720|AT5G58670|AT3G03670|AT5G50720|AT3G26650|AT2G35930|AT1G18100|AT2G18060|AT3G13750|AT1G20340|AT1G69260|AT1G01470|AT5G01040|AT1G25560|AT1G72430|AT4G34710|AT2G26740|AT5G59220|AT4G10380|AT4G39640|AT5G20230|AT1G12980|AT3G02480…
43234	6.1116e-06	0.00016888	37	1084	438	27594	protein complex	AT2G34430|AT1G61520|AT4G04640|AT4G21280|AT1G30380|AT1G63020|AT1G67740|AT4G12800|AT3G21055|AT1G31330|AT1G15820|AT4G28750|AT1G29920|AT4G10340|AT4G05180|AT1G20350|AT1G73860|AT1G07430|AT3G47470|AT2G20260|AT1G79040|AT5G54270|AT1G08380|AT2G34420|AT4G02770|AT1G06680|AT1G55670|AT1G66160|AT1G29930|AT5G13630|AT3G61470|AT3G16140|AT5G13990|AT1G52230|AT4G21710|AT3G50820|AT1G29910
42440	1.2599e-05	0.00034118	9	92	438	27594	pigment metabolic process	AT3G56940|AT3G53130|AT5G13630|AT3G59400|AT3G51820|AT1G06000|AT4G27440|AT1G74470|AT4G22570
43229	1.53e-05	0.00040171	131	6090	438	27594	intracellular organelle	AT2G39800|AT3G03660|AT1G61520|AT1G63020|AT1G67740|AT4G27440|AT3G04510|AT4G24570|AT4G01050|AT4G39940|AT1G26870|AT5G60120|AT5G64960|AT1G73860|AT2G24820|AT2G05620|AT1G54780|AT4G35985|AT2G24260|AT5G50670|AT2G28500|AT1G23800|AT5G03720|AT3G47470|AT2G29670|AT1G79040|AT4G02770|AT3G53130|AT3G26650|AT1G18100|AT5G65640|AT3G53370|AT1G10585|AT5G62530|AT1G52230|AT4G30980|AT3G50820|AT1G29910|AT4G16770|AT1G71500…
43226	1.5428e-05	0.00040171	131	6091	438	27594	organelle	AT2G39800|AT3G03660|AT1G61520|AT1G63020|AT1G67740|AT4G27440|AT3G04510|AT4G24570|AT4G01050|AT4G39940|AT1G26870|AT5G60120|AT5G64960|AT1G73860|AT2G24820|AT2G05620|AT1G54780|AT4G35985|AT2G24260|AT5G50670|AT2G28500|AT1G23800|AT5G03720|AT3G47470|AT2G29670|AT1G79040|AT4G02770|AT3G53130|AT3G26650|AT1G18100|AT5G65640|AT3G53370|AT1G10585|AT5G62530|AT1G52230|AT4G30980|AT3G50820|AT1G29910|AT4G16770|AT1G71500…
9654	1.6806e-05	0.00042935	4	11	438	27594	oxygen evolving complex	AT4G05180|AT4G21280|AT1G06680|AT3G50820
5737	1.8287e-05	0.00045266	107	4745	438	27594	cytoplasm	AT2G39800|AT3G03660|AT1G61520|AT1G67740|AT4G27440|AT3G04510|AT4G24570|AT4G01050|AT4G39940|AT5G64960|AT1G73860|AT2G24820|AT2G05620|AT1G54780|AT4G35985|AT2G28500|AT1G23800|AT3G47470|AT2G29670|AT1G79040|AT4G04830|AT4G02770|AT3G53130|AT3G26650|AT5G62530|AT1G52230|AT3G50820|AT1G29910|AT4G16770|AT1G71500|AT4G22570|AT2G47400|AT5G54770|AT1G20350|AT1G19250|AT1G06520|AT1G08380|AT1G12980|AT5G66190|AT1G55670…
31977	1.8387e-05	0.00045266	8	74	438	27594	thylakoid lumen	AT4G05180|AT4G21280|AT5G66190|AT1G06680|AT1G54780|AT3G21055|AT1G20340|AT3G50820
15994	2.7341e-05	0.00066107	6	39	438	27594	chlorophyll metabolic process	AT3G56940|AT5G13630|AT3G59400|AT3G51820|AT4G27440|AT1G74470
31978	2.99e-05	0.00069801	7	58	438	27594	plastid thylakoid lumen	AT4G05180|AT4G21280|AT1G06680|AT1G54780|AT3G21055|AT1G20340|AT3G50820
9543	2.99e-05	0.00069801	7	58	438	27594	chloroplast thylakoid lumen	AT4G05180|AT4G21280|AT1G06680|AT1G54780|AT3G21055|AT1G20340|AT3G50820
10033	3.3202e-05	0.00076195	34	1037	438	27594	response to organic substance	AT2G39800|AT1G63020|AT5G59845|AT3G53480|AT4G27440|AT1G69260|AT1G74430|AT1G26870|AT5G54230|AT1G25560|AT1G72430|AT1G61800|AT4G34710|AT3G50970|AT1G09530|AT2G26740|AT5G03720|AT5G58670|AT5G59220|AT1G12980|AT5G50720|AT3G26650|AT2G35930|AT1G18100|AT1G35720|AT5G15960|AT1G31880|AT1G66160|AT4G23550|AT2G34340|AT1G03800|AT2G18060|AT5G01490|AT2G47770
3700	3.438e-05	0.00077423	45	1547	438	27594	transcription factor activity	AT3G03660|AT1G55580|AT5G49300|AT3G54990|AT5G15210|AT3G28920|AT5G61890|AT3G20880|AT5G45580|AT1G74430|AT1G25440|AT1G26870|AT3G47710|AT5G54230|AT5G60120|AT1G22490|AT1G25560|AT5G50570|AT2G24260|AT1G09530|AT5G03720|AT5G56270|AT5G13180|AT1G12980|AT5G21960|AT1G35560|AT5G65640|AT5G53950|AT5G58900|AT3G57230|AT5G17800|AT1G14600|AT4G23550|AT4G17600|AT1G69690|AT1G03800|AT2G18060|AT5G07310|AT5G03790|AT5G13790…
9767	3.488e-05	0.00077423	5	25	438	27594	photosynthetic electron transport chain	AT4G04640|AT5G66190|AT1G55670|AT2G05620|AT4G01050
9414	3.7977e-05	0.00082937	12	188	438	27594	response to water deprivation	AT2G39800|AT5G50720|AT1G01470|AT2G35930|AT3G02480|AT2G05620|AT1G35720|AT3G50970|AT5G15960|AT2G26740|AT5G58670|AT5G59220
6779	5.5437e-05	0.0011914	6	44	438	27594	porphyrin biosynthetic process	AT3G56940|AT5G13630|AT3G59400|AT3G51820|AT4G27440|AT1G74470
9415	5.6938e-05	0.0012046	12	196	438	27594	response to water	AT2G39800|AT5G50720|AT1G01470|AT2G35930|AT3G02480|AT2G05620|AT1G35720|AT3G50970|AT5G15960|AT2G26740|AT5G58670|AT5G59220
9628	6.9256e-05	0.0014381	36	1168	438	27594	response to abiotic stimulus	AT2G39800|AT1G30040|AT1G16850|AT1G15820|AT1G29920|AT4G10340|AT3G47710|AT5G54230|AT5G54770|AT1G01470|AT2G38380|AT1G25560|AT2G05620|AT4G34710|AT3G50970|AT1G09530|AT2G26740|AT5G03720|AT5G58670|AT5G59220|AT5G20230|AT1G20900|AT3G26490|AT5G50720|AT3G26650|AT2G35930|AT3G02480|AT1G35720|AT2G18950|AT5G15960|AT4G36220|AT5G62530|AT1G20340|AT2G47770|AT2G47450|AT3G50820
9533	7.0098e-05	0.0014381	3	6	438	27594	chloroplast stromal thylakoid	AT4G10340|AT1G67740|AT3G26060
50832	8.5451e-05	0.0017269	9	117	438	27594	defense response to fungus	AT2G34930|AT1G01470|AT1G19250|AT5G61890|AT3G50970|AT4G12480|AT4G12490|AT2G39200|AT4G12470
33014	9.1499e-05	0.0018219	6	48	438	27594	tetrapyrrole biosynthetic process	AT3G56940|AT5G13630|AT3G59400|AT3G51820|AT4G27440|AT1G74470
31323	9.4038e-05	0.0018453	46	1664	438	27594	regulation of cellular metabolic process	AT3G03660|AT1G55580|AT1G63020|AT5G49300|AT3G54990|AT5G42750|AT5G15210|AT3G28920|AT5G61890|AT3G20880|AT5G45580|AT1G74430|AT4G39940|AT1G25440|AT5G54230|AT5G60120|AT1G22490|AT1G61800|AT5G50570|AT2G24260|AT1G09530|AT5G03720|AT5G56270|AT1G12980|AT5G21960|AT1G55670|AT1G35560|AT5G65640|AT3G57230|AT3G53370|AT5G17800|AT1G14600|AT4G23550|AT4G17600|AT1G69690|AT1G03800|AT2G18060|AT5G07310|AT5G03790|AT4G30980…
44424	0.0001391	0.0026907	140	6908	438	27594	intracellular part	AT2G39800|AT3G03660|AT1G61520|AT1G63020|AT1G67740|AT4G27440|AT3G04510|AT4G24570|AT4G01050|AT4G39940|AT5G54075|AT1G26870|AT5G60120|AT5G64960|AT1G73860|AT2G24820|AT2G05620|AT1G54780|AT4G35985|AT2G24260|AT5G50670|AT2G28500|AT1G23800|AT5G03720|AT3G47470|AT2G29670|AT1G79040|AT4G04830|AT4G02770|AT3G53130|AT3G26650|AT1G18100|AT5G65640|AT3G53370|AT1G10585|AT5G62530|AT1G52230|AT4G30980|AT3G50820|AT1G29910…
50789	0.0001562	0.0029439	67	2783	438	27594	regulation of biological process	AT3G03660|AT1G63020|AT3G28920|AT5G61890|AT3G20880|AT1G74430|AT4G39940|AT1G26870|AT3G47710|AT5G54230|AT3G17185|AT5G60120|AT5G64960|AT1G61800|AT2G24260|AT1G09530|AT5G03720|AT5G58670|AT1G07390|AT1G18100|AT5G65640|AT5G53950|AT3G53370|AT5G17800|AT4G09570|AT1G69690|AT2G18060|AT4G30980|AT5G57390|AT1G20340|AT3G26060|AT5G58120|AT3G50820|AT2G41130|AT1G55580|AT2G34930|AT5G49300|AT3G54990|AT5G42750|AT5G15210…
80090	0.00015942	0.0029439	44	1604	438	27594	regulation of primary metabolic process	AT3G03660|AT1G55580|AT1G63020|AT5G49300|AT3G54990|AT5G42750|AT5G15210|AT3G28920|AT5G61890|AT3G20880|AT5G45580|AT1G74430|AT4G39940|AT1G25440|AT5G54230|AT5G60120|AT1G22490|AT5G50570|AT2G24260|AT1G09530|AT5G03720|AT5G56270|AT1G12980|AT5G21960|AT1G35560|AT5G65640|AT3G57230|AT3G53370|AT5G17800|AT1G14600|AT4G23550|AT4G17600|AT1G69690|AT1G03800|AT2G18060|AT5G07310|AT5G03790|AT4G30980|AT5G57390|AT2G28510…
6950	0.00016018	0.0029439	49	1853	438	27594	response to stress	AT2G39800|AT5G14780|AT5G61890|AT5G19875|AT4G01050|AT2G39200|AT5G54230|AT2G05620|AT3G50970|AT5G03720|AT5G58670|AT3G54420|AT3G03670|AT5G50720|AT3G26650|AT2G35930|AT1G71697|AT5G62530|AT3G13750|AT5G58120|AT4G12490|AT2G34930|AT1G17420|AT1G16850|AT5G45380|AT5G54770|AT1G01470|AT1G19250|AT2G38380|AT4G34710|AT2G26740|AT4G12480|AT5G59220|AT4G39640|AT5G20230|AT5G66190|AT1G06680|AT1G66760|AT3G02480|AT1G35720…
9620	0.00016089	0.0029439	10	156	438	27594	response to fungus	AT2G34930|AT1G01470|AT1G19250|AT5G61890|AT3G50970|AT1G17420|AT4G12480|AT4G12490|AT2G39200|AT4G12470
51707	0.00023067	0.0041617	20	528	438	27594	response to other organism	AT2G34930|AT5G66190|AT1G06680|AT5G61890|AT1G17420|AT4G01050|AT2G39200|AT4G36010|AT4G37990|AT3G60160|AT1G01470|AT1G19250|AT5G64960|AT1G61800|AT2G29630|AT3G50970|AT4G12480|AT4G12490|AT4G34131|AT4G12470
9769	0.00023667	0.0041617	2	2	438	27594	photosynthesis, light harvesting in photosystem II	AT2G34420|AT2G34430
9783	0.00023667	0.0041617	2	2	438	27594	photosystem II antenna complex	AT4G10340|AT1G15820
9570	0.00024404	0.0042363	15	335	438	27594	chloroplast stroma	AT4G21280|AT3G26650|AT5G66190|AT1G06680|AT1G67740|AT1G35720|AT1G10960|AT2G47400|AT4G10340|AT4G05180|AT5G54770|AT2G29630|AT1G20340|AT3G26060|AT3G50820
31326	0.00025488	0.0043139	42	1540	438	27594	regulation of cellular biosynthetic process	AT3G03660|AT1G55580|AT1G63020|AT5G49300|AT3G54990|AT5G42750|AT5G15210|AT3G28920|AT5G61890|AT3G20880|AT5G45580|AT1G74430|AT4G39940|AT1G25440|AT5G54230|AT5G60120|AT1G22490|AT5G50570|AT2G24260|AT5G03720|AT5G56270|AT1G12980|AT5G21960|AT1G35560|AT5G65640|AT3G57230|AT3G53370|AT5G17800|AT1G14600|AT4G23550|AT4G17600|AT1G69690|AT1G03800|AT2G18060|AT5G07310|AT5G03790|AT4G30980|AT5G57390|AT2G28510|AT1G20340…
9889	0.00025488	0.0043139	42	1540	438	27594	regulation of biosynthetic process	AT3G03660|AT1G55580|AT1G63020|AT5G49300|AT3G54990|AT5G42750|AT5G15210|AT3G28920|AT5G61890|AT3G20880|AT5G45580|AT1G74430|AT4G39940|AT1G25440|AT5G54230|AT5G60120|AT1G22490|AT5G50570|AT2G24260|AT5G03720|AT5G56270|AT1G12980|AT5G21960|AT1G35560|AT5G65640|AT3G57230|AT3G53370|AT5G17800|AT1G14600|AT4G23550|AT4G17600|AT1G69690|AT1G03800|AT2G18060|AT5G07310|AT5G03790|AT4G30980|AT5G57390|AT2G28510|AT1G20340…
9416	0.00027962	0.0046741	18	455	438	27594	response to light stimulus	AT5G20230|AT1G20900|AT3G26490|AT3G26650|AT1G30040|AT5G15960|AT1G15820|AT4G36220|AT1G29920|AT4G10340|AT3G47710|AT1G01470|AT1G25560|AT2G05620|AT1G09530|AT1G20340|AT2G47450|AT3G50820
46483	0.00028573	0.004718	15	340	438	27594	heterocycle metabolic process	AT3G56940|AT2G39800|AT4G04640|AT1G56430|AT3G59400|AT2G18950|AT4G27440|AT4G22570|AT5G13630|AT5G54770|AT5G62530|AT2G29630|AT3G51820|AT1G06000|AT1G74470
30528	0.00031574	0.0051507	46	1756	438	27594	transcription regulator activity	AT3G03660|AT1G55580|AT5G49300|AT3G54990|AT5G15210|AT3G28920|AT5G61890|AT3G20880|AT5G45580|AT1G74430|AT1G25440|AT1G26870|AT3G47710|AT5G54230|AT5G60120|AT1G22490|AT1G25560|AT5G50570|AT2G24260|AT1G09530|AT5G03720|AT5G56270|AT5G13180|AT5G01840|AT1G12980|AT5G21960|AT1G35560|AT5G65640|AT5G53950|AT5G58900|AT3G57230|AT5G17800|AT1G14600|AT4G23550|AT4G17600|AT1G69690|AT1G03800|AT2G18060|AT5G07310|AT5G03790…
6778	0.0003196	0.0051516	6	60	438	27594	porphyrin metabolic process	AT3G56940|AT5G13630|AT3G59400|AT3G51820|AT4G27440|AT1G74470
9737	0.00033659	0.0053617	13	272	438	27594	response to abscisic acid stimulus	AT2G39800|AT5G50720|AT1G18100|AT1G35720|AT5G15960|AT1G31880|AT1G69260|AT5G54230|AT4G34710|AT3G50970|AT2G47770|AT5G58670|AT5G59220
65007	0.00034685	0.0054609	74	3243	438	27594	biological regulation	AT3G03660|AT1G63020|AT3G28920|AT5G61890|AT3G20880|AT3G53480|AT1G74430|AT4G39940|AT1G26870|AT3G47710|AT5G54230|AT3G17185|AT5G60120|AT2G25630|AT5G64960|AT1G61800|AT2G24260|AT1G09530|AT5G03720|AT5G58670|AT1G07390|AT1G18100|AT5G65640|AT5G53950|AT3G53370|AT5G17800|AT4G09570|AT1G69690|AT2G18060|AT1G77110|AT4G30980|AT5G57390|AT1G20340|AT3G26060|AT5G58120|AT3G50820|AT2G41130|AT2G40610|AT1G55580|AT2G34930…
9055	0.00038119	0.0058734	17	427	438	27594	electron carrier activity	AT3G48280|AT3G03670|AT5G20230|AT1G13110|AT5G66190|AT1G71500|AT2G14100|AT1G17420|AT1G10960|AT3G20100|AT1G19250|AT2G38380|AT2G24820|AT3G48520|AT2G05620|AT1G20340|AT4G37400
33013	0.00038244	0.0058734	6	62	438	27594	tetrapyrrole metabolic process	AT3G56940|AT5G13630|AT3G59400|AT3G51820|AT4G27440|AT1G74470
9607	0.00038931	0.0058734	20	550	438	27594	response to biotic stimulus	AT2G34930|AT5G66190|AT1G06680|AT5G61890|AT1G17420|AT4G01050|AT2G39200|AT4G36010|AT4G37990|AT3G60160|AT1G01470|AT1G19250|AT5G64960|AT1G61800|AT2G29630|AT3G50970|AT4G12480|AT4G12490|AT4G34131|AT4G12470
50794	0.0003928	0.0058734	59	2448	438	27594	regulation of cellular process	AT3G03660|AT1G63020|AT3G28920|AT5G61890|AT3G20880|AT1G74430|AT4G39940|AT1G26870|AT5G54230|AT5G60120|AT1G61800|AT2G24260|AT1G09530|AT5G03720|AT5G58670|AT1G07390|AT5G65640|AT3G53370|AT5G17800|AT4G09570|AT1G69690|AT2G18060|AT4G30980|AT5G57390|AT1G20340|AT3G26060|AT5G58120|AT3G50820|AT2G41130|AT1G55580|AT2G34930|AT5G49300|AT3G54990|AT5G42750|AT5G15210|AT5G45580|AT1G25440|AT1G22490|AT5G50570|AT5G41740…
19222	0.00039488	0.0058734	47	1825	438	27594	regulation of metabolic process	AT3G03660|AT1G55580|AT1G63020|AT5G49300|AT3G54990|AT5G42750|AT5G15210|AT3G28920|AT5G61890|AT3G20880|AT5G45580|AT1G74430|AT4G39940|AT1G25440|AT5G54230|AT3G17185|AT5G60120|AT1G22490|AT1G61800|AT5G50570|AT2G24260|AT1G09530|AT5G03720|AT5G56270|AT1G12980|AT5G21960|AT1G55670|AT1G35560|AT5G65640|AT3G57230|AT3G53370|AT5G17800|AT1G14600|AT4G23550|AT4G17600|AT1G69690|AT1G03800|AT2G18060|AT5G07310|AT5G03790…
9725	0.00039908	0.0058734	25	767	438	27594	response to hormone stimulus	AT2G39800|AT5G59845|AT3G53480|AT4G27440|AT1G69260|AT1G26870|AT5G54230|AT1G25560|AT1G72430|AT4G34710|AT3G50970|AT1G09530|AT2G26740|AT5G58670|AT5G59220|AT1G12980|AT5G50720|AT1G18100|AT1G35720|AT5G15960|AT1G31880|AT2G34340|AT1G03800|AT5G01490|AT2G47770
9314	0.00042163	0.0061386	18	471	438	27594	response to radiation	AT5G20230|AT1G20900|AT3G26490|AT3G26650|AT1G30040|AT5G15960|AT1G15820|AT4G36220|AT1G29920|AT4G10340|AT3G47710|AT1G01470|AT1G25560|AT2G05620|AT1G09530|AT1G20340|AT2G47450|AT3G50820
9532	0.0004366	0.0062835	15	354	438	27594	plastid stroma	AT4G21280|AT3G26650|AT5G66190|AT1G06680|AT1G67740|AT1G35720|AT1G10960|AT2G47400|AT4G10340|AT4G05180|AT5G54770|AT2G29630|AT1G20340|AT3G26060|AT3G50820
5576	0.00044087	0.0062835	16	393	438	27594	extracellular region	AT3G54400|AT2G40610|AT3G26650|AT5G66190|AT1G06680|AT3G24770|AT1G35720|AT5G65870|AT1G14720|AT1G29920|AT1G53830|AT4G05180|AT5G01040|AT2G47160|AT1G78060|AT4G39640
51537	0.00054601	0.0077011	3	11	438	27594	2 iron, 2 sulfur cluster binding	AT2G24820|AT1G71500|AT1G10960
32991	0.00057131	0.0079748	41	1552	438	27594	macromolecular complex	AT2G34430|AT1G61520|AT4G04640|AT4G21280|AT1G30380|AT1G63020|AT1G67740|AT4G12800|AT3G21055|AT1G31330|AT1G15820|AT4G28750|AT1G29920|AT4G10340|AT4G05180|AT5G54075|AT1G20350|AT1G73860|AT1G07430|AT3G47470|AT2G20260|AT1G79040|AT5G54270|AT1G08380|AT2G34420|AT4G02970|AT4G02770|AT1G06680|AT1G55670|AT1G66160|AT1G29930|AT5G13630|AT3G61470|AT3G16140|AT5G13990|AT5G39785|AT1G52230|AT4G21710|AT2G47450|AT3G50820…
10556	0.00058605	0.0080971	40	1504	438	27594	regulation of macromolecule biosynthetic process	AT3G03660|AT1G55580|AT1G63020|AT5G49300|AT3G54990|AT5G15210|AT3G28920|AT5G61890|AT3G20880|AT5G45580|AT1G74430|AT1G25440|AT5G54230|AT5G60120|AT1G22490|AT5G50570|AT2G24260|AT5G03720|AT5G56270|AT1G12980|AT5G21960|AT1G35560|AT5G65640|AT3G57230|AT3G53370|AT5G17800|AT1G14600|AT4G23550|AT4G17600|AT1G69690|AT1G03800|AT2G18060|AT5G07310|AT5G03790|AT4G30980|AT5G57390|AT2G28510|AT1G20340|AT2G02060|AT2G41130
9719	0.0006074	0.0083072	26	835	438	27594	response to endogenous stimulus	AT2G39800|AT5G59845|AT3G53480|AT4G27440|AT1G69260|AT1G74430|AT1G26870|AT5G54230|AT1G25560|AT1G72430|AT4G34710|AT3G50970|AT1G09530|AT2G26740|AT5G58670|AT5G59220|AT1G12980|AT5G50720|AT1G18100|AT1G35720|AT5G15960|AT1G31880|AT2G34340|AT1G03800|AT5G01490|AT2G47770
22857	0.00066279	0.0089577	26	840	438	27594	transmembrane transporter activity	AT1G60030|AT3G53480|AT1G12950|AT2G32270|AT4G24570|AT5G45380|AT4G21903|AT5G61730|AT1G20350|AT5G06530|AT2G01320|AT1G28230|AT2G22500|AT1G61800|AT2G47160|AT4G10380|AT3G05155|AT1G66760|AT1G31880|AT1G10540|AT3G60160|AT3G17690|AT5G01490|AT3G16240|AT1G77110|AT5G10180
5622	0.00066819	0.0089577	141	7208	438	27594	intracellular	AT2G39800|AT3G03660|AT1G61520|AT1G63020|AT1G67740|AT4G27440|AT3G04510|AT4G24570|AT4G01050|AT4G39940|AT5G54075|AT1G26870|AT5G60120|AT5G64960|AT1G73860|AT2G24820|AT2G05620|AT1G54780|AT4G35985|AT2G24260|AT5G50670|AT2G28500|AT1G23800|AT5G03720|AT3G47470|AT2G29670|AT1G79040|AT4G04830|AT4G02770|AT3G53130|AT3G26650|AT1G18100|AT5G65640|AT3G53370|AT1G10585|AT5G62530|AT1G52230|AT4G30980|AT3G50820|AT1G29910…
45449	0.00070033	0.0091493	39	1468	438	27594	regulation of transcription	AT3G03660|AT1G55580|AT1G63020|AT5G49300|AT3G54990|AT5G15210|AT3G28920|AT5G61890|AT3G20880|AT5G45580|AT1G74430|AT1G25440|AT5G54230|AT5G60120|AT1G22490|AT5G50570|AT2G24260|AT5G03720|AT5G56270|AT1G12980|AT5G21960|AT1G35560|AT5G65640|AT3G57230|AT3G53370|AT5G17800|AT1G14600|AT4G23550|AT4G17600|AT1G69690|AT1G03800|AT2G18060|AT5G07310|AT5G03790|AT4G30980|AT5G57390|AT2G28510|AT2G02060|AT2G41130
4103	0.00070275	0.0091493	2	3	438	27594	choline kinase activity	AT1G71697|AT4G09760
16328	0.00070275	0.0091493	2	3	438	27594	lateral plasma membrane	AT2G47160|AT4G10380
60255	0.00084172	0.010854	43	1685	438	27594	regulation of macromolecule metabolic process	AT3G03660|AT1G55580|AT1G63020|AT5G49300|AT3G54990|AT5G15210|AT3G28920|AT5G61890|AT3G20880|AT5G45580|AT1G74430|AT1G25440|AT5G54230|AT3G17185|AT5G60120|AT1G22490|AT5G50570|AT2G24260|AT5G03720|AT5G56270|AT1G12980|AT5G21960|AT1G55670|AT1G35560|AT5G65640|AT3G57230|AT3G53370|AT5G17800|AT1G14600|AT4G23550|AT4G17600|AT1G69690|AT1G03800|AT2G18060|AT5G07310|AT5G03790|AT4G30980|AT5G57390|AT2G28510|AT1G20340…
10468	0.00092479	0.011813	42	1642	438	27594	regulation of gene expression	AT3G03660|AT1G55580|AT1G63020|AT5G49300|AT3G54990|AT5G15210|AT3G28920|AT5G61890|AT3G20880|AT5G45580|AT1G74430|AT1G25440|AT5G54230|AT3G17185|AT5G60120|AT1G22490|AT5G50570|AT2G24260|AT5G03720|AT5G56270|AT1G12980|AT5G21960|AT1G55670|AT1G35560|AT5G65640|AT3G57230|AT3G53370|AT5G17800|AT1G14600|AT4G23550|AT4G17600|AT1G69690|AT1G03800|AT2G18060|AT5G07310|AT5G03790|AT4G30980|AT5G57390|AT2G28510|AT1G20340…
3674	0.00095373	0.012069	396	24443	438	27594	molecular_function	AT5G63350|AT2G14100|AT5G19875|AT3G53480|AT4G24570|AT2G37100|AT4G39940|AT1G61800|AT2G05620|AT2G24260|AT4G37400|AT4G34131|AT4G04830|AT1G07390|AT4G27850|AT4G02770|AT3G53130|AT3G06020|AT5G65640|AT1G67470|AT3G53370|AT4G27970|AT1G02810|AT2G25460|AT1G30040|AT3G21790|AT1G71500|AT4G26890|AT1G67480|AT5G24080|AT5G54770|AT1G20350|AT1G53035|AT5G06530|AT1G19250|AT2G30930|AT2G02250|AT5G13180|AT4G10380|AT1G08380…
3824	0.0012282	0.015398	145	7553	438	27594	catalytic activity	AT2G39800|AT2G28470|AT1G63020|AT1G62290|AT2G14100|AT3G53480|AT4G27440|AT4G39940|AT5G61730|AT2G25630|AT5G64960|AT1G73860|AT1G23480|AT2G24820|AT1G23800|AT1G07430|AT4G37400|AT5G58670|AT4G34131|AT4G04830|AT3G48280|AT3G03670|AT1G78090|AT3G53130|AT3G26650|AT1G71697|AT1G67470|AT1G30730|AT4G09570|AT2G43590|AT1G02810|AT5G62530|AT5G59490|AT2G01670|AT3G13750|AT1G05000|AT2G47550|AT3G50820|AT4G16770|AT5G49900…
51704	0.0012502	0.01553	22	694	438	27594	multi-organism process	AT2G34930|AT5G66190|AT1G06680|AT5G61890|AT1G17420|AT4G01050|AT2G39200|AT4G36010|AT4G37990|AT3G60160|AT2G25630|AT1G01470|AT1G19250|AT5G64960|AT1G61800|AT2G29630|AT3G50970|AT4G12480|AT4G12490|AT1G61610|AT4G34131|AT4G12470
9228	0.0013912	0.016523	2	4	438	27594	thiamin biosynthetic process	AT5G54770|AT2G29630
9768	0.0013912	0.016523	2	4	438	27594	photosynthesis, light harvesting in photosystem I	AT1G08380|AT3G61470
46713	0.0013912	0.016523	2	4	438	27594	boron transport	AT2G47160|AT4G10380
46715	0.0013912	0.016523	2	4	438	27594	boron transmembrane transporter activity	AT2G47160|AT4G10380
42724	0.0013912	0.016523	2	4	438	27594	thiamin and derivative biosynthetic process	AT5G54770|AT2G29630
19219	0.0014438	0.016999	39	1527	438	27594	regulation of nucleobase, nucleoside, nucleotide and nucleic acid metabolic process	AT3G03660|AT1G55580|AT1G63020|AT5G49300|AT3G54990|AT5G15210|AT3G28920|AT5G61890|AT3G20880|AT5G45580|AT1G74430|AT1G25440|AT5G54230|AT5G60120|AT1G22490|AT5G50570|AT2G24260|AT5G03720|AT5G56270|AT1G12980|AT5G21960|AT1G35560|AT5G65640|AT3G57230|AT3G53370|AT5G17800|AT1G14600|AT4G23550|AT4G17600|AT1G69690|AT1G03800|AT2G18060|AT5G07310|AT5G03790|AT4G30980|AT5G57390|AT2G28510|AT2G02060|AT2G41130
3677	0.0014588	0.017028	52	2207	438	27594	DNA binding	AT3G03660|AT1G63020|AT3G28920|AT5G61890|AT3G20880|AT2G37100|AT1G74430|AT1G26870|AT3G47710|AT5G54230|AT5G60120|AT2G24260|AT5G50670|AT1G09530|AT5G03720|AT1G20900|AT5G65640|AT5G53950|AT3G53370|AT5G17800|AT1G69690|AT2G18060|AT4G21710|AT4G30980|AT5G57390|AT2G41130|AT1G55580|AT5G49300|AT3G54990|AT5G15210|AT5G45580|AT1G25440|AT1G22490|AT1G25560|AT5G50570|AT5G56270|AT5G13180|AT3G56940|AT1G12980|AT5G21960…
51536	0.0015943	0.018294	4	33	438	27594	iron-sulfur cluster binding	AT2G24820|AT1G71500|AT2G29630|AT1G10960
51540	0.0015943	0.018294	4	33	438	27594	metal cluster binding	AT2G24820|AT1G71500|AT2G29630|AT1G10960
22900	0.0016965	0.019303	5	56	438	27594	electron transport chain	AT4G04640|AT5G66190|AT1G55670|AT2G05620|AT4G01050
48046	0.0017269	0.019485	12	286	438	27594	apoplast	AT1G29920|AT4G05180|AT3G54400|AT3G26650|AT5G66190|AT1G06680|AT5G01040|AT3G24770|AT1G35720|AT1G78060|AT4G39640|AT1G14720
51171	0.0017786	0.019903	39	1545	438	27594	regulation of nitrogen compound metabolic process	AT3G03660|AT1G55580|AT1G63020|AT5G49300|AT3G54990|AT5G15210|AT3G28920|AT5G61890|AT3G20880|AT5G45580|AT1G74430|AT1G25440|AT5G54230|AT5G60120|AT1G22490|AT5G50570|AT2G24260|AT5G03720|AT5G56270|AT1G12980|AT5G21960|AT1G35560|AT5G65640|AT3G57230|AT3G53370|AT5G17800|AT1G14600|AT4G23550|AT4G17600|AT1G69690|AT1G03800|AT2G18060|AT5G07310|AT5G03790|AT4G30980|AT5G57390|AT2G28510|AT2G02060|AT2G41130
16620	0.0019913	0.0221	4	35	438	27594	oxidoreductase activity, acting on the aldehyde or oxo group of donors, NAD or NADP as acceptor	AT2G39800|AT5G62530|AT3G26650|AT1G23800
8266	0.0021009	0.02294	3	17	438	27594	poly(U) RNA binding	AT5G66190|AT1G06680|AT3G50820
8187	0.0021009	0.02294	3	17	438	27594	poly-pyrimidine tract binding	AT5G66190|AT1G06680|AT3G50820
6952	0.0022868	0.024467	20	637	438	27594	defense response	AT3G54420|AT2G34930|AT5G66190|AT1G06680|AT2G35930|AT5G61890|AT1G17420|AT4G09420|AT4G01050|AT2G39200|AT1G66090|AT4G37990|AT1G01470|AT1G19250|AT4G14370|AT3G50970|AT4G12480|AT5G58120|AT4G12490|AT4G12470
10731	0.002295	0.024467	2	5	438	27594	protein amino acid glutathionylation	AT1G75270|AT5G02780
9772	0.002295	0.024467	2	5	438	27594	photosynthetic electron transport in photosystem II	AT4G04640|AT4G01050
44271	0.0023776	0.025151	14	378	438	27594	cellular nitrogen compound biosynthetic process	AT3G56940|AT2G39800|AT4G04640|AT1G56430|AT3G59400|AT4G27440|AT3G25900|AT4G22570|AT5G13630|AT5G54770|AT2G29630|AT4G34710|AT3G51820|AT1G74470
16709	0.0024517	0.025734	4	37	438	27594	oxidoreductase activity, acting on paired donors, with incorporation or reduction of molecular oxygen, NADH or NADPH as one donor, and incorporation of one atom of oxygen	AT3G56940|AT1G19250|AT4G36380|AT1G12140
4497	0.0025606	0.02667	12	300	438	27594	monooxygenase activity	AT4G36220|AT3G48280|AT3G56940|AT1G12130|AT3G20100|AT1G13110|AT1G19250|AT4G36380|AT1G12140|AT3G48520|AT2G14100|AT4G37400
10109	0.0029262	0.030245	3	19	438	27594	regulation of photosynthesis	AT1G55670|AT1G61800|AT3G50820
45487	0.0034074	0.033432	2	6	438	27594	gibberellin catabolic process	AT1G30040|AT5G13790
6772	0.0034074	0.033432	2	6	438	27594	thiamin metabolic process	AT5G54770|AT2G29630
15204	0.0034074	0.033432	2	6	438	27594	urea transmembrane transporter activity	AT3G16240|AT5G45380
42723	0.0034074	0.033432	2	6	438	27594	thiamin and derivative metabolic process	AT5G54770|AT2G29630
16103	0.0034074	0.033432	2	6	438	27594	diterpenoid catabolic process	AT1G30040|AT5G13790
42887	0.0034074	0.033432	2	6	438	27594	amide transmembrane transporter activity	AT3G16240|AT5G45380
10196	0.0034074	0.033432	2	6	438	27594	nonphotochemical quenching	AT4G10340|AT1G15820
9644	0.0042615	0.041511	4	43	438	27594	response to high light intensity	AT1G01470|AT2G05620|AT2G47450|AT3G50820
9611	0.0046307	0.044786	7	133	438	27594	response to wounding	AT5G20230|AT1G01470|AT1G66760|AT5G14780|AT4G34710|AT1G17420|AT1G71697
[truncated: 205 more columns]

## Sheet: GO full
Description	GO-ID	corr p-value	x	n
chloroplast thylakoid membrane	9535	1.327e-32	43	211	Cellular component	AT2G34430|AT1G61520|AT4G04640|AT4G21280|AT1G30380|AT2G06520|AT1G67740|AT1G71500|AT4G12800|AT3G21055|AT1G31330|AT4G27440|AT1G15820|AT2G30570|AT4G01050|AT4G28750|AT1G29920|AT4G10340|AT4G05180|AT2G05620|AT1G54780|AT3G51820|AT3G26070|AT3G47470|AT2G20260|AT1G79040|AT5G54270|AT3G56940|AT2G34420|AT4G02770|AT3G26650|AT5G66190|AT1G06680|AT1G55670|AT4G17600|AT1G29930|AT3G61470|AT3G16140|AT1G52230|AT3G26060…
plastid thylakoid membrane	55035	1.327e-32	43	211	Cellular component	AT2G34430|AT1G61520|AT4G04640|AT4G21280|AT1G30380|AT2G06520|AT1G67740|AT1G71500|AT4G12800|AT3G21055|AT1G31330|AT4G27440|AT1G15820|AT2G30570|AT4G01050|AT4G28750|AT1G29920|AT4G10340|AT4G05180|AT2G05620|AT1G54780|AT3G51820|AT3G26070|AT3G47470|AT2G20260|AT1G79040|AT5G54270|AT3G56940|AT2G34420|AT4G02770|AT3G26650|AT5G66190|AT1G06680|AT1G55670|AT4G17600|AT1G29930|AT3G61470|AT3G16140|AT1G52230|AT3G26060…
photosynthetic membrane	34357	1.3768e-32	44	227	Cellular component	AT2G34430|AT1G61520|AT4G04640|AT4G21280|AT1G30380|AT2G06520|AT1G67740|AT1G71500|AT4G12800|AT3G21055|AT1G31330|AT4G27440|AT1G15820|AT2G30570|AT4G01050|AT4G28750|AT1G29920|AT4G10340|AT4G05180|AT2G05620|AT1G54780|AT3G51820|AT3G26070|AT3G47470|AT2G20260|AT1G79040|AT5G54270|AT1G08380|AT3G56940|AT2G34420|AT4G02770|AT3G26650|AT5G66190|AT1G06680|AT1G55670|AT4G17600|AT1G29930|AT3G61470|AT3G16140|AT1G52230…
thylakoid membrane	42651	9.6682e-32	43	224	Cellular component	AT2G34430|AT1G61520|AT4G04640|AT4G21280|AT1G30380|AT2G06520|AT1G67740|AT1G71500|AT4G12800|AT3G21055|AT1G31330|AT4G27440|AT1G15820|AT2G30570|AT4G01050|AT4G28750|AT1G29920|AT4G10340|AT4G05180|AT2G05620|AT1G54780|AT3G51820|AT3G26070|AT3G47470|AT2G20260|AT1G79040|AT5G54270|AT3G56940|AT2G34420|AT4G02770|AT3G26650|AT5G66190|AT1G06680|AT1G55670|AT4G17600|AT1G29930|AT3G61470|AT3G16140|AT1G52230|AT3G26060…
thylakoid part	44436	7.2281e-31	45	266	Cellular component	AT2G34430|AT1G61520|AT4G04640|AT4G21280|AT1G30380|AT2G06520|AT1G67740|AT1G71500|AT4G12800|AT3G21055|AT1G31330|AT4G27440|AT1G15820|AT2G30570|AT4G01050|AT4G28750|AT1G29920|AT4G10340|AT4G05180|AT2G05620|AT1G54780|AT3G51820|AT3G26070|AT3G47470|AT2G20260|AT1G79040|AT5G54270|AT1G08380|AT3G56940|AT2G34420|AT4G02770|AT3G26650|AT5G66190|AT1G06680|AT1G55670|AT4G17600|AT1G29930|AT3G61470|AT3G16140|AT1G52230…
photosynthesis	15979	8.8036e-31	33	113	Biological processes	AT2G34430|AT1G61520|AT4G04640|AT4G21280|AT1G30380|AT2G06520|AT1G67740|AT1G71500|AT4G12800|AT3G21055|AT1G31330|AT4G27440|AT1G15820|AT2G30570|AT4G01050|AT4G28750|AT1G29920|AT4G10340|AT4G05180|AT2G05620|AT1G54780|AT3G51820|AT3G26070|AT3G47470|AT2G20260|AT1G79040|AT5G54270|AT3G56940|AT2G34420|AT4G02770|AT3G26650|AT5G66190|AT1G06680|AT1G55670|AT4G17600|AT1G29930|AT3G61470|AT3G16140|AT1G52230|AT1G20340…
plastid thylakoid	31976	8.8036e-31	44	254	Cellular component	AT2G34430|AT1G61520|AT4G04640|AT4G21280|AT1G30380|AT2G06520|AT1G67740|AT1G71500|AT4G12800|AT3G21055|AT1G31330|AT4G27440|AT1G15820|AT2G30570|AT4G01050|AT4G28750|AT1G29920|AT4G10340|AT4G05180|AT2G05620|AT1G54780|AT3G51820|AT3G26070|AT3G47470|AT2G20260|AT1G79040|AT5G54270|AT3G56940|AT2G34420|AT4G02770|AT3G26650|AT5G66190|AT1G06680|AT1G55670|AT4G17600|AT1G29930|AT3G61470|AT3G16140|AT1G52230|AT1G20340…
chloroplast thylakoid	9534	8.8036e-31	44	254	Cellular component	AT2G34430|AT1G61520|AT4G04640|AT1G30380|AT2G06520|AT1G67740|AT4G12800|AT1G31330|AT1G15820|AT4G01050|AT1G29920|AT4G10340|AT1G61800|AT2G05620|AT1G54780|AT3G47470|AT2G20260|AT1G79040|AT5G54270|AT1G08380|AT3G56940|AT2G34420|AT4G02770|AT3G26650|AT5G66190|AT1G06680|AT1G55670|AT1G29930|AT3G61470|AT3G16140|AT1G52230|AT3G50820|AT1G29910
organelle subcompartment	31984	1.0481e-30	44	256	Cellular component	AT2G34430|AT1G61520|AT4G04640|AT4G21280|AT1G30380|AT2G06520|AT1G67740|AT1G71500|AT4G12800|AT3G21055|AT1G31330|AT4G27440|AT1G15820|AT2G30570|AT4G01050|AT4G28750|AT1G29920|AT4G10340|AT4G05180|AT2G05620|AT1G54780|AT3G51820|AT3G26070|AT3G47470|AT2G20260|AT1G79040|AT5G54270|AT3G56940|AT2G34420|AT4G02770|AT3G26650|AT5G66190|AT1G06680|AT1G55670|AT4G17600|AT1G29930|AT3G61470|AT3G16140|AT1G52230|AT1G20340…
thylakoid	9579	1.0543e-30	48	322	Cellular component	AT2G34430|AT1G61520|AT4G04640|AT4G21280|AT1G30380|AT2G06520|AT1G67740|AT5G14780|AT1G71500|AT4G12800|AT3G21055|AT1G31330|AT4G27440|AT1G15820|AT2G30570|AT4G01050|AT4G28750|AT1G29920|AT4G10340|AT4G05180|AT5G54770|AT2G05620|AT1G54780|AT3G51820|AT3G26070|AT3G47470|AT2G20260|AT1G79040|AT5G54270|AT1G08380|AT3G56940|AT2G34420|AT4G02770|AT3G26650|AT5G66190|AT1G06680|AT1G55670|AT1G35720|AT4G17600|AT1G29930…
photosystem	9521	1.1573e-24	20	38	Cellular component	AT1G08380|AT4G02770|AT4G21280|AT1G30380|AT1G06680|AT1G67740|AT1G55670|AT4G12800|AT3G21055|AT1G31330|AT1G15820|AT4G28750|AT4G10340|AT4G05180|AT3G61470|AT3G16140|AT1G52230|AT3G50820|AT2G20260|AT1G79040
chloroplast part	44434	1.8672e-20	56	755	Cellular component	AT2G34430|AT1G61520|AT4G04640|AT1G30380|AT2G06520|AT1G67740|AT3G21055|AT4G27440|AT1G15820|AT4G01050|AT4G05180|AT2G24820|AT2G05620|AT1G54780|AT2G29630|AT3G51820|AT3G26070|AT3G47470|AT2G20260|AT1G79040|AT5G54270|AT4G02770|AT3G53130|AT3G26650|AT5G19940|AT3G61470|AT3G16140|AT1G52230|AT3G61870|AT1G20340|AT3G26060|AT3G50820|AT1G29910|AT4G21280|AT1G71500|AT4G12800|AT1G31330|AT2G30570|AT4G28750|AT2G47400…
plastid part	44435	9.2097e-20	56	782	Cellular component	AT2G34430|AT1G61520|AT4G04640|AT1G30380|AT2G06520|AT1G67740|AT3G21055|AT4G27440|AT1G15820|AT4G01050|AT4G05180|AT2G24820|AT2G05620|AT1G54780|AT2G29630|AT3G51820|AT3G26070|AT3G47470|AT2G20260|AT1G79040|AT5G54270|AT4G02770|AT3G53130|AT3G26650|AT5G19940|AT3G61470|AT3G16140|AT1G52230|AT3G61870|AT1G20340|AT3G26060|AT3G50820|AT1G29910|AT4G21280|AT1G71500|AT4G12800|AT1G31330|AT2G30570|AT4G28750|AT2G47400…
photosystem I	9522	1.2708e-15	11	15	Cellular component	AT1G08380|AT4G02770|AT3G61470|AT1G30380|AT3G16140|AT1G55670|AT1G52230|AT4G12800|AT1G31330|AT4G28750|AT2G20260
plastoglobule	10287	1.1747e-14	16	55	Cellular component	AT2G34420|AT2G34430|AT4G02770|AT1G61520|AT4G12800|AT1G31330|AT1G15820|AT4G28750|AT4G10340|AT1G52230|AT3G26070|AT3G47470|AT3G26060|AT3G50820|AT2G20260|AT1G29910
photosynthesis, light reaction	19684	1.2122e-13	16	63	Biological processes	AT1G08380|AT2G34420|AT2G34430|AT1G61520|AT4G04640|AT5G66190|AT1G06680|AT1G55670|AT4G12800|AT4G01050|AT3G61470|AT2G05620|AT1G54780|AT3G50820|AT1G79040|AT1G29910
chloroplast	9507	1.2901e-12	80	2070	Cellular component	AT1G10370|AT2G34430|AT2G39800|AT3G03660|AT1G61520|AT4G04640|AT1G30380|AT2G06520|AT1G67740|AT5G14780|AT3G21055|AT4G27440|AT3G04510|AT1G15820|AT4G01050|AT4G39940|AT4G05180|AT1G73860|AT2G24820|AT2G05620|AT1G54780|AT4G35985|AT2G29630|AT3G51820|AT2G28500|AT3G26070|AT3G47470|AT2G29670|AT2G20260|AT1G79040|AT5G54270|AT4G02770|AT3G53130|AT5G14370|AT3G26650|AT3G24430|AT5G19940|AT3G61470|AT5G62530|AT3G16140…
plastid	9536	7.027e-12	80	2139	Cellular component	AT1G10370|AT2G34430|AT2G39800|AT3G03660|AT1G61520|AT4G04640|AT1G30380|AT2G06520|AT1G67740|AT5G14780|AT3G21055|AT4G27440|AT3G04510|AT1G15820|AT4G01050|AT4G39940|AT4G05180|AT1G73860|AT2G24820|AT2G05620|AT1G54780|AT4G35985|AT2G29630|AT3G51820|AT2G28500|AT3G26070|AT3G47470|AT2G29670|AT2G20260|AT1G79040|AT5G54270|AT4G02770|AT3G53130|AT5G14370|AT3G26650|AT3G24430|AT5G19940|AT3G61470|AT5G62530|AT3G16140…
light-harvesting complex	30076	2.6419e-11	10	22	Cellular component	AT2G34420|AT1G29920|AT2G34430|AT1G29930|AT4G10340|AT3G61470|AT1G61520|AT3G47470|AT1G29910|AT5G54270
chlorophyll binding	16168	4.3797e-11	10	23	Molecular function	AT2G34420|AT1G29920|AT2G34430|AT1G29930|AT4G10340|AT3G61470|AT1G61520|AT3G47470|AT1G15820|AT1G29910
photosystem I reaction center	9538	9.9649e-11	7	8	Cellular component	AT4G02770|AT3G16140|AT1G52230|AT4G12800|AT1G31330|AT4G28750|AT2G20260
photosystem II	9523	1.8629e-09	9	23	Cellular component	AT4G10340|AT4G05180|AT4G21280|AT1G06680|AT1G67740|AT3G21055|AT1G15820|AT3G50820|AT1G79040
intracellular organelle part	44446	4.5844e-08	67	1970	Cellular component	AT2G34430|AT1G61520|AT4G04640|AT1G30380|AT2G06520|AT1G63020|AT1G67740|AT3G21055|AT4G27440|AT4G24570|AT1G15820|AT4G01050|AT4G05180|AT5G64960|AT1G73860|AT2G24820|AT2G05620|AT1G54780|AT2G29630|AT3G51820|AT3G26070|AT3G47470|AT2G20260|AT1G79040|AT5G54270|AT4G02770|AT3G53130|AT3G26650|AT5G19940|AT3G61470|AT3G16140|AT1G52230|AT4G21710|AT3G61870|AT1G20340|AT3G26060|AT3G50820|AT1G29910|AT4G21280|AT1G71500…
organelle part	44422	4.5844e-08	67	1972	Cellular component	AT2G34430|AT1G61520|AT4G04640|AT1G30380|AT2G06520|AT1G63020|AT1G67740|AT3G21055|AT4G27440|AT4G24570|AT1G15820|AT4G01050|AT4G05180|AT5G64960|AT1G73860|AT2G24820|AT2G05620|AT1G54780|AT2G29630|AT3G51820|AT3G26070|AT3G47470|AT2G20260|AT1G79040|AT5G54270|AT4G02770|AT3G53130|AT3G26650|AT5G19940|AT3G61470|AT3G16140|AT1G52230|AT4G21710|AT3G61870|AT1G20340|AT3G26060|AT3G50820|AT1G29910|AT4G21280|AT1G71500…
membrane	16020	7.8683e-08	103	3727	Cellular component	AT1G60030|AT2G39800|AT5G41280|AT1G61520|AT1G67740|AT5G43980|AT3G53480|AT4G27440|AT4G24570|AT4G01050|AT4G21903|AT5G61730|AT1G61800|AT2G05620|AT1G54780|AT3G47470|AT1G79040|AT4G02770|AT3G26490|AT1G65730|AT3G26650|AT4G27970|AT5G41290|AT1G52230|AT3G50820|AT1G29910|AT5G49900|AT1G71500|AT4G22730|AT2G32270|AT5G45380|AT1G20350|AT1G19250|AT1G28230|AT3G13520|AT4G10380|AT1G06520|AT1G08380|AT5G66190|AT1G55670…
generation of precursor metabolites and energy	6091	1.1474e-07	18	199	Biological processes	AT1G08380|AT2G34420|AT2G34430|AT1G61520|AT4G04640|AT3G26650|AT5G66190|AT1G06680|AT1G55670|AT4G12800|AT4G01050|AT5G58330|AT3G61470|AT2G05620|AT1G54780|AT3G50820|AT1G79040|AT1G29910
plastid envelope	9526	3.8525e-07	24	382	Cellular component	AT3G56940|AT2G34430|AT3G53130|AT4G04640|AT3G26650|AT5G66190|AT1G06680|AT1G55670|AT1G71500|AT4G12800|AT3G16290|AT5G19940|AT1G31330|AT4G27440|AT1G15820|AT4G01050|AT5G13630|AT5G54770|AT3G16240|AT2G24820|AT3G61870|AT3G47470|AT3G26060|AT2G47450
response to stimulus	50896	5.0989e-07	90	3207	Biological processes	AT2G39800|AT1G63020|AT5G14780|AT5G61890|AT5G59845|AT5G19875|AT3G53480|AT4G27440|AT1G12950|AT1G15820|AT4G01050|AT2G39200|AT1G74430|AT4G21903|AT1G26870|AT3G47710|AT5G54230|AT5G64960|AT1G61800|AT2G05620|AT2G29630|AT3G50970|AT1G09530|AT5G03720|AT5G58670|AT4G34131|AT3G54420|AT3G03670|AT1G20900|AT3G26490|AT5G50720|AT3G26650|AT2G35930|AT1G18100|AT1G71697|AT5G62530|AT2G18060|AT3G13750|AT1G20340|AT5G58120…
chloroplast envelope	9941	5.6965e-07	23	361	Cellular component	AT3G56940|AT2G34430|AT3G53130|AT4G04640|AT5G66190|AT1G06680|AT1G55670|AT1G71500|AT4G12800|AT3G16290|AT5G19940|AT1G31330|AT4G27440|AT1G15820|AT4G01050|AT5G13630|AT5G54770|AT3G16240|AT2G24820|AT3G61870|AT3G47470|AT3G26060|AT2G47450
photosynthesis, light harvesting	9765	8.5257e-07	7	21	Biological processes	AT1G08380|AT2G34420|AT2G34430|AT3G61470|AT1G61520|AT1G54780|AT1G29910
membrane part	44425	1.0684e-06	43	1098	Cellular component	AT5G41280|AT5G49900|AT4G04640|AT4G21280|AT1G30380|AT1G67740|AT3G06470|AT5G43980|AT4G12800|AT3G21055|AT1G31330|AT2G32270|AT1G15820|AT4G28750|AT4G36010|AT4G10340|AT4G05180|AT1G20350|AT1G19250|AT1G28230|AT2G47160|AT3G13520|AT4G10380|AT2G20260|AT1G79040|AT1G08380|AT5G20230|AT4G02770|AT3G05155|AT1G06680|AT1G55670|AT5G23660|AT4G09420|AT4G27970|AT5G41290|AT1G66090|AT3G60160|AT3G61470|AT3G16140|AT1G52230…
chloroplast photosystem II	30095	5.8454e-06	6	17	Cellular component	AT4G05180|AT4G21280|AT1G06680|AT1G67740|AT3G21055|AT3G50820
cell wall	5618	9.5224e-06	24	458	Cellular component	AT3G54420|AT3G03670|AT2G28470|AT3G54400|AT4G02330|AT2G41800|AT5G43980|AT5G25460|AT1G35720|AT2G16430|AT1G14720|AT2G38870|AT2G44450|AT1G53830|AT1G21670|AT1G02810|AT2G25630|AT2G38380|AT3G47400|AT3G16240|AT3G13750|AT2G47550|AT1G78060|AT4G39640
external encapsulating structure	30312	1.0821e-05	24	462	Cellular component	AT3G54420|AT3G03670|AT2G28470|AT3G54400|AT4G02330|AT2G41800|AT5G43980|AT5G25460|AT1G35720|AT2G16430|AT1G14720|AT2G38870|AT2G44450|AT1G53830|AT1G21670|AT1G02810|AT2G25630|AT2G38380|AT3G47400|AT3G16240|AT3G13750|AT2G47550|AT1G78060|AT4G39640
tetrapyrrole binding	46906	1.9461e-05	19	314	Molecular function	AT3G48280|AT3G03670|AT2G34420|AT2G34430|AT1G61520|AT1G13110|AT3G59400|AT2G14100|AT1G15820|AT1G29920|AT1G29930|AT4G10340|AT3G20100|AT3G61470|AT2G38380|AT3G48520|AT3G47470|AT4G37400|AT1G29910
organelle envelope	31967	3.0667e-05	27	601	Cellular component	AT2G34430|AT4G04640|AT1G71500|AT4G12800|AT1G31330|AT4G27440|AT4G24570|AT1G15820|AT4G01050|AT5G54770|AT1G20350|AT2G22500|AT2G24820|AT3G47470|AT3G56940|AT3G53130|AT3G26650|AT5G66190|AT1G06680|AT1G55670|AT3G16290|AT5G19940|AT5G13630|AT3G16240|AT3G61870|AT3G26060|AT2G47450
envelope	31975	3.0667e-05	27	601	Cellular component	AT2G34430|AT4G04640|AT1G71500|AT4G12800|AT1G31330|AT4G27440|AT4G24570|AT1G15820|AT4G01050|AT5G54770|AT1G20350|AT2G22500|AT2G24820|AT3G47470|AT3G56940|AT3G53130|AT3G26650|AT5G66190|AT1G06680|AT1G55670|AT3G16290|AT5G19940|AT5G13630|AT3G16240|AT3G61870|AT3G26060|AT2G47450
plant-type cell wall	9505	3.0667e-05	14	180	Cellular component	AT3G03670|AT3G54400|AT2G41800|AT5G43980|AT5G25460|AT2G16430|AT2G44450|AT1G53830|AT1G21670|AT2G25630|AT2G38380|AT3G16240|AT3G13750|AT4G39640
cytoplasmic part	44444	4.7584e-05	104	4323	Cellular component	AT2G39800|AT3G03660|AT1G61520|AT1G67740|AT4G27440|AT3G04510|AT4G24570|AT4G01050|AT4G39940|AT5G64960|AT1G73860|AT2G24820|AT2G05620|AT1G54780|AT4G35985|AT2G28500|AT1G23800|AT3G47470|AT2G29670|AT1G79040|AT4G04830|AT4G02770|AT3G53130|AT3G26650|AT5G62530|AT1G52230|AT3G50820|AT1G29910|AT4G16770|AT1G71500|AT4G22570|AT2G47400|AT5G54770|AT1G20350|AT1G19250|AT1G06520|AT1G08380|AT1G12980|AT5G66190|AT1G55670…
intracellular membrane-bounded organelle	43231	4.7584e-05	130	5766	Cellular component	AT2G39800|AT3G03660|AT1G61520|AT1G63020|AT1G67740|AT4G27440|AT3G04510|AT4G24570|AT4G01050|AT4G39940|AT1G26870|AT5G60120|AT5G64960|AT1G73860|AT2G24820|AT2G05620|AT1G54780|AT4G35985|AT2G24260|AT5G50670|AT2G28500|AT1G23800|AT5G03720|AT3G47470|AT2G29670|AT1G79040|AT4G02770|AT3G53130|AT3G26650|AT1G18100|AT5G65640|AT3G53370|AT1G10585|AT5G62530|AT1G52230|AT4G30980|AT3G50820|AT1G29910|AT4G16770|AT1G71500…
membrane-bounded organelle	43227	4.7584e-05	130	5767	Cellular component	AT2G39800|AT3G03660|AT1G61520|AT1G63020|AT1G67740|AT4G27440|AT3G04510|AT4G24570|AT4G01050|AT4G39940|AT1G26870|AT5G60120|AT5G64960|AT1G73860|AT2G24820|AT2G05620|AT1G54780|AT4G35985|AT2G24260|AT5G50670|AT2G28500|AT1G23800|AT5G03720|AT3G47470|AT2G29670|AT1G79040|AT4G02770|AT3G53130|AT3G26650|AT1G18100|AT5G65640|AT3G53370|AT1G10585|AT5G62530|AT1G52230|AT4G30980|AT3G50820|AT1G29910|AT4G16770|AT1G71500…
oxidoreductase activity	16491	5.2368e-05	44	1326	Molecular function	AT2G39800|AT1G12130|AT5G16980|AT1G30040|AT5G14780|AT1G71500|AT5G16960|AT2G14100|AT1G17420|AT4G27440|AT5G58330|AT1G19250|AT2G38380|AT2G26500|AT5G01040|AT2G24820|AT3G48520|AT1G23800|AT1G74470|AT4G37400|AT4G04830|AT3G48280|AT3G56940|AT3G03670|AT3G53130|AT5G43450|AT1G13110|AT5G16010|AT3G26650|AT5G66190|AT1G12140|AT1G35720|AT5G16970|AT2G38240|AT1G30730|AT4G36220|AT4G37990|AT3G20100|AT5G62530|AT4G36380…
cell part	44464	5.4998e-05	228	11708	Cellular component	AT1G60030|AT3G03660|AT5G43980|AT2G14100|AT3G53480|AT3G04510|AT4G24570|AT4G39940|AT5G61730|AT5G54075|AT2G24820|AT1G61800|AT2G05620|AT2G24260|AT2G28500|AT5G03720|AT3G47470|AT4G34131|AT4G04830|AT3G03670|AT4G02770|AT3G53130|AT1G65730|AT5G50720|AT3G26650|AT5G65640|AT3G53370|AT4G27970|AT1G10585|AT1G30730|AT2G43590|AT1G02810|AT3G12145|AT2G40610|AT1G71500|AT4G22730|AT3G25597|AT5G45380|AT1G53830|AT5G54770…
cell	5623	5.4998e-05	228	11708	Cellular component	AT1G60030|AT3G03660|AT5G43980|AT2G14100|AT3G53480|AT3G04510|AT4G24570|AT4G39940|AT5G61730|AT5G54075|AT2G24820|AT1G61800|AT2G05620|AT2G24260|AT2G28500|AT5G03720|AT3G47470|AT4G34131|AT4G04830|AT3G03670|AT4G02770|AT3G53130|AT1G65730|AT5G50720|AT3G26650|AT5G65640|AT3G53370|AT4G27970|AT1G10585|AT1G30730|AT2G43590|AT1G02810|AT3G12145|AT2G40610|AT1G71500|AT4G22730|AT3G25597|AT5G45380|AT1G53830|AT5G54770…
chlorophyll biosynthetic process	15995	6.8756e-05	6	26	Biological processes	AT3G56940|AT5G13630|AT3G59400|AT3G51820|AT4G27440|AT1G74470
pigment biosynthetic process	46148	7.5532e-05	9	76	Biological processes	AT3G56940|AT3G53130|AT5G13630|AT3G59400|AT3G51820|AT1G06000|AT4G27440|AT1G74470|AT4G22570
heterocycle biosynthetic process	18130	7.5591e-05	11	120	Biological processes	AT3G56940|AT2G39800|AT5G13630|AT5G54770|AT1G56430|AT3G59400|AT2G29630|AT3G51820|AT4G27440|AT1G74470|AT4G22570
response to chemical stimulus	42221	0.00014112	51	1710	Biological processes	AT2G39800|AT1G63020|AT5G14780|AT5G59845|AT5G19875|AT3G53480|AT4G27440|AT1G12950|AT1G74430|AT4G21903|AT1G26870|AT5G54230|AT1G61800|AT2G05620|AT2G29630|AT3G50970|AT1G09530|AT5G03720|AT5G58670|AT3G03670|AT5G50720|AT3G26650|AT2G35930|AT1G18100|AT2G18060|AT3G13750|AT1G20340|AT1G69260|AT1G01470|AT5G01040|AT1G25560|AT1G72430|AT4G34710|AT2G26740|AT5G59220|AT4G10380|AT4G39640|AT5G20230|AT1G12980|AT3G02480…
protein complex	43234	0.00016888	37	1084	Cellular component	AT2G34430|AT1G61520|AT4G04640|AT4G21280|AT1G30380|AT1G63020|AT1G67740|AT4G12800|AT3G21055|AT1G31330|AT1G15820|AT4G28750|AT1G29920|AT4G10340|AT4G05180|AT1G20350|AT1G73860|AT1G07430|AT3G47470|AT2G20260|AT1G79040|AT5G54270|AT1G08380|AT2G34420|AT4G02770|AT1G06680|AT1G55670|AT1G66160|AT1G29930|AT5G13630|AT3G61470|AT3G16140|AT5G13990|AT1G52230|AT4G21710|AT3G50820|AT1G29910
pigment metabolic process	42440	0.00034118	9	92	Biological processes	AT3G56940|AT3G53130|AT5G13630|AT3G59400|AT3G51820|AT1G06000|AT4G27440|AT1G74470|AT4G22570
intracellular organelle	43229	0.00040171	131	6090	Cellular component	AT2G39800|AT3G03660|AT1G61520|AT1G63020|AT1G67740|AT4G27440|AT3G04510|AT4G24570|AT4G01050|AT4G39940|AT1G26870|AT5G60120|AT5G64960|AT1G73860|AT2G24820|AT2G05620|AT1G54780|AT4G35985|AT2G24260|AT5G50670|AT2G28500|AT1G23800|AT5G03720|AT3G47470|AT2G29670|AT1G79040|AT4G02770|AT3G53130|AT3G26650|AT1G18100|AT5G65640|AT3G53370|AT1G10585|AT5G62530|AT1G52230|AT4G30980|AT3G50820|AT1G29910|AT4G16770|AT1G71500…
organelle	43226	0.00040171	131	6091	Cellular component	AT2G39800|AT3G03660|AT1G61520|AT1G63020|AT1G67740|AT4G27440|AT3G04510|AT4G24570|AT4G01050|AT4G39940|AT1G26870|AT5G60120|AT5G64960|AT1G73860|AT2G24820|AT2G05620|AT1G54780|AT4G35985|AT2G24260|AT5G50670|AT2G28500|AT1G23800|AT5G03720|AT3G47470|AT2G29670|AT1G79040|AT4G02770|AT3G53130|AT3G26650|AT1G18100|AT5G65640|AT3G53370|AT1G10585|AT5G62530|AT1G52230|AT4G30980|AT3G50820|AT1G29910|AT4G16770|AT1G71500…
oxygen evolving complex	9654	0.00042935	4	11	Cellular component	AT4G05180|AT4G21280|AT1G06680|AT3G50820
cytoplasm	5737	0.00045266	107	4745	Cellular component	AT2G39800|AT3G03660|AT1G61520|AT1G67740|AT4G27440|AT3G04510|AT4G24570|AT4G01050|AT4G39940|AT5G64960|AT1G73860|AT2G24820|AT2G05620|AT1G54780|AT4G35985|AT2G28500|AT1G23800|AT3G47470|AT2G29670|AT1G79040|AT4G04830|AT4G02770|AT3G53130|AT3G26650|AT5G62530|AT1G52230|AT3G50820|AT1G29910|AT4G16770|AT1G71500|AT4G22570|AT2G47400|AT5G54770|AT1G20350|AT1G19250|AT1G06520|AT1G08380|AT1G12980|AT5G66190|AT1G55670…
thylakoid lumen	31977	0.00045266	8	74	Cellular component	AT4G05180|AT4G21280|AT5G66190|AT1G06680|AT1G54780|AT3G21055|AT1G20340|AT3G50820
chlorophyll metabolic process	15994	0.00066107	6	39	Biological processes	AT3G56940|AT5G13630|AT3G59400|AT3G51820|AT4G27440|AT1G74470
plastid thylakoid lumen	31978	0.00069801	7	58	Cellular component	AT4G05180|AT4G21280|AT1G06680|AT1G54780|AT3G21055|AT1G20340|AT3G50820
chloroplast thylakoid lumen	9543	0.00069801	7	58	Cellular component	AT4G05180|AT4G21280|AT1G06680|AT1G54780|AT3G21055|AT1G20340|AT3G50820
response to organic substance	10033	0.00076195	34	1037	Biological processes	AT2G39800|AT1G63020|AT5G59845|AT3G53480|AT4G27440|AT1G69260|AT1G74430|AT1G26870|AT5G54230|AT1G25560|AT1G72430|AT1G61800|AT4G34710|AT3G50970|AT1G09530|AT2G26740|AT5G03720|AT5G58670|AT5G59220|AT1G12980|AT5G50720|AT3G26650|AT2G35930|AT1G18100|AT1G35720|AT5G15960|AT1G31880|AT1G66160|AT4G23550|AT2G34340|AT1G03800|AT2G18060|AT5G01490|AT2G47770
photosynthetic electron transport chain	9767	0.00077423	5	25	Biological processes	AT3G03660|AT1G55580|AT5G49300|AT3G54990|AT5G15210|AT3G28920|AT5G61890|AT3G20880|AT5G45580|AT1G74430|AT1G25440|AT1G26870|AT3G47710|AT5G54230|AT5G60120|AT1G22490|AT1G25560|AT5G50570|AT2G24260|AT1G09530|AT5G03720|AT5G56270|AT5G13180|AT1G12980|AT5G21960|AT1G35560|AT5G65640|AT5G53950|AT5G58900|AT3G57230|AT5G17800|AT1G14600|AT4G23550|AT4G17600|AT1G69690|AT1G03800|AT2G18060|AT5G07310|AT5G03790|AT5G13790…
transcription factor activity	3700	0.00077423	45	1547	Molecular function	AT4G04640|AT5G66190|AT1G55670|AT2G05620|AT4G01050
response to water deprivation	9414	0.00082937	12	188	Biological processes	AT2G39800|AT5G50720|AT1G01470|AT2G35930|AT3G02480|AT2G05620|AT1G35720|AT3G50970|AT5G15960|AT2G26740|AT5G58670|AT5G59220
porphyrin biosynthetic process	6779	0.0011914	6	44	Biological processes	AT3G56940|AT5G13630|AT3G59400|AT3G51820|AT4G27440|AT1G74470
response to water	9415	0.0012046	12	196	Biological processes	AT2G39800|AT5G50720|AT1G01470|AT2G35930|AT3G02480|AT2G05620|AT1G35720|AT3G50970|AT5G15960|AT2G26740|AT5G58670|AT5G59220
response to abiotic stimulus	9628	0.0014381	36	1168	Biological processes	AT2G39800|AT1G30040|AT1G16850|AT1G15820|AT1G29920|AT4G10340|AT3G47710|AT5G54230|AT5G54770|AT1G01470|AT2G38380|AT1G25560|AT2G05620|AT4G34710|AT3G50970|AT1G09530|AT2G26740|AT5G03720|AT5G58670|AT5G59220|AT5G20230|AT1G20900|AT3G26490|AT5G50720|AT3G26650|AT2G35930|AT3G02480|AT1G35720|AT2G18950|AT5G15960|AT4G36220|AT5G62530|AT1G20340|AT2G47770|AT2G47450|AT3G50820
chloroplast stromal thylakoid	9533	0.0014381	3	6	Cellular component	AT4G10340|AT1G67740|AT3G26060
defense response to fungus	50832	0.0017269	9	117	Biological processes	AT2G34930|AT1G01470|AT1G19250|AT5G61890|AT3G50970|AT4G12480|AT4G12490|AT2G39200|AT4G12470
tetrapyrrole biosynthetic process	33014	0.0018219	6	48	Biological processes	AT3G56940|AT5G13630|AT3G59400|AT3G51820|AT4G27440|AT1G74470
regulation of cellular metabolic process	31323	0.0018453	46	1664	Biological processes	AT3G03660|AT1G55580|AT1G63020|AT5G49300|AT3G54990|AT5G42750|AT5G15210|AT3G28920|AT5G61890|AT3G20880|AT5G45580|AT1G74430|AT4G39940|AT1G25440|AT5G54230|AT5G60120|AT1G22490|AT1G61800|AT5G50570|AT2G24260|AT1G09530|AT5G03720|AT5G56270|AT1G12980|AT5G21960|AT1G55670|AT1G35560|AT5G65640|AT3G57230|AT3G53370|AT5G17800|AT1G14600|AT4G23550|AT4G17600|AT1G69690|AT1G03800|AT2G18060|AT5G07310|AT5G03790|AT4G30980…
intracellular part	44424	0.0026907	140	6908	Cellular component	AT2G39800|AT3G03660|AT1G61520|AT1G63020|AT1G67740|AT4G27440|AT3G04510|AT4G24570|AT4G01050|AT4G39940|AT5G54075|AT1G26870|AT5G60120|AT5G64960|AT1G73860|AT2G24820|AT2G05620|AT1G54780|AT4G35985|AT2G24260|AT5G50670|AT2G28500|AT1G23800|AT5G03720|AT3G47470|AT2G29670|AT1G79040|AT4G04830|AT4G02770|AT3G53130|AT3G26650|AT1G18100|AT5G65640|AT3G53370|AT1G10585|AT5G62530|AT1G52230|AT4G30980|AT3G50820|AT1G29910…
regulation of biological process	50789	0.0029439	67	2783	Biological processes	AT3G03660|AT1G63020|AT3G28920|AT5G61890|AT3G20880|AT1G74430|AT4G39940|AT1G26870|AT3G47710|AT5G54230|AT3G17185|AT5G60120|AT5G64960|AT1G61800|AT2G24260|AT1G09530|AT5G03720|AT5G58670|AT1G07390|AT1G18100|AT5G65640|AT5G53950|AT3G53370|AT5G17800|AT4G09570|AT1G69690|AT2G18060|AT4G30980|AT5G57390|AT1G20340|AT3G26060|AT5G58120|AT3G50820|AT2G41130|AT1G55580|AT2G34930|AT5G49300|AT3G54990|AT5G42750|AT5G15210…
regulation of primary metabolic process	80090	0.0029439	44	1604	Biological processes	AT3G03660|AT1G55580|AT1G63020|AT5G49300|AT3G54990|AT5G42750|AT5G15210|AT3G28920|AT5G61890|AT3G20880|AT5G45580|AT1G74430|AT4G39940|AT1G25440|AT5G54230|AT5G60120|AT1G22490|AT5G50570|AT2G24260|AT1G09530|AT5G03720|AT5G56270|AT1G12980|AT5G21960|AT1G35560|AT5G65640|AT3G57230|AT3G53370|AT5G17800|AT1G14600|AT4G23550|AT4G17600|AT1G69690|AT1G03800|AT2G18060|AT5G07310|AT5G03790|AT4G30980|AT5G57390|AT2G28510…
response to stress	6950	0.0029439	49	1853	Biological processes	AT2G39800|AT5G14780|AT5G61890|AT5G19875|AT4G01050|AT2G39200|AT5G54230|AT2G05620|AT3G50970|AT5G03720|AT5G58670|AT3G54420|AT3G03670|AT5G50720|AT3G26650|AT2G35930|AT1G71697|AT5G62530|AT3G13750|AT5G58120|AT4G12490|AT2G34930|AT1G17420|AT1G16850|AT5G45380|AT5G54770|AT1G01470|AT1G19250|AT2G38380|AT4G34710|AT2G26740|AT4G12480|AT5G59220|AT4G39640|AT5G20230|AT5G66190|AT1G06680|AT1G66760|AT3G02480|AT1G35720…
response to fungus	9620	0.0029439	10	156	Biological processes	AT2G34930|AT1G01470|AT1G19250|AT5G61890|AT3G50970|AT1G17420|AT4G12480|AT4G12490|AT2G39200|AT4G12470
response to other organism	51707	0.0041617	20	528	Biological processes	AT2G34930|AT5G66190|AT1G06680|AT5G61890|AT1G17420|AT4G01050|AT2G39200|AT4G36010|AT4G37990|AT3G60160|AT1G01470|AT1G19250|AT5G64960|AT1G61800|AT2G29630|AT3G50970|AT4G12480|AT4G12490|AT4G34131|AT4G12470
photosynthesis, light harvesting in photosystem II	9769	0.0041617	2	2	Biological processes	AT2G34420|AT2G34430
photosystem II antenna complex	9783	0.0041617	2	2	Cellular component	AT4G10340|AT1G15820
chloroplast stroma	9570	0.0042363	15	335	Cellular component	AT4G21280|AT3G26650|AT5G66190|AT1G06680|AT1G67740|AT1G35720|AT1G10960|AT2G47400|AT4G10340|AT4G05180|AT5G54770|AT2G29630|AT1G20340|AT3G26060|AT3G50820
regulation of cellular biosynthetic process	31326	0.0043139	42	1540	Biological processes	AT3G03660|AT1G55580|AT1G63020|AT5G49300|AT3G54990|AT5G42750|AT5G15210|AT3G28920|AT5G61890|AT3G20880|AT5G45580|AT1G74430|AT4G39940|AT1G25440|AT5G54230|AT5G60120|AT1G22490|AT5G50570|AT2G24260|AT5G03720|AT5G56270|AT1G12980|AT5G21960|AT1G35560|AT5G65640|AT3G57230|AT3G53370|AT5G17800|AT1G14600|AT4G23550|AT4G17600|AT1G69690|AT1G03800|AT2G18060|AT5G07310|AT5G03790|AT4G30980|AT5G57390|AT2G28510|AT1G20340…
regulation of biosynthetic process	9889	0.0043139	42	1540	Biological processes	AT3G03660|AT1G55580|AT1G63020|AT5G49300|AT3G54990|AT5G42750|AT5G15210|AT3G28920|AT5G61890|AT3G20880|AT5G45580|AT1G74430|AT4G39940|AT1G25440|AT5G54230|AT5G60120|AT1G22490|AT5G50570|AT2G24260|AT5G03720|AT5G56270|AT1G12980|AT5G21960|AT1G35560|AT5G65640|AT3G57230|AT3G53370|AT5G17800|AT1G14600|AT4G23550|AT4G17600|AT1G69690|AT1G03800|AT2G18060|AT5G07310|AT5G03790|AT4G30980|AT5G57390|AT2G28510|AT1G20340…
response to light stimulus	9416	0.0046741	18	455	Biological processes	AT5G20230|AT1G20900|AT3G26490|AT3G26650|AT1G30040|AT5G15960|AT1G15820|AT4G36220|AT1G29920|AT4G10340|AT3G47710|AT1G01470|AT1G25560|AT2G05620|AT1G09530|AT1G20340|AT2G47450|AT3G50820
heterocycle metabolic process	46483	0.004718	15	340	Biological processes	AT3G56940|AT2G39800|AT4G04640|AT1G56430|AT3G59400|AT2G18950|AT4G27440|AT4G22570|AT5G13630|AT5G54770|AT5G62530|AT2G29630|AT3G51820|AT1G06000|AT1G74470
transcription regulator activity	30528	0.0051507	46	1756	Molecular function	AT3G03660|AT1G55580|AT5G49300|AT3G54990|AT5G15210|AT3G28920|AT5G61890|AT3G20880|AT5G45580|AT1G74430|AT1G25440|AT1G26870|AT3G47710|AT5G54230|AT5G60120|AT1G22490|AT1G25560|AT5G50570|AT2G24260|AT1G09530|AT5G03720|AT5G56270|AT5G13180|AT5G01840|AT1G12980|AT5G21960|AT1G35560|AT5G65640|AT5G53950|AT5G58900|AT3G57230|AT5G17800|AT1G14600|AT4G23550|AT4G17600|AT1G69690|AT1G03800|AT2G18060|AT5G07310|AT5G03790…
porphyrin metabolic process	6778	0.0051516	6	60	Biological processes	AT3G56940|AT5G13630|AT3G59400|AT3G51820|AT4G27440|AT1G74470
response to abscisic acid stimulus	9737	0.0053617	13	272	Biological processes	AT2G39800|AT5G50720|AT1G18100|AT1G35720|AT5G15960|AT1G31880|AT1G69260|AT5G54230|AT4G34710|AT3G50970|AT2G47770|AT5G58670|AT5G59220
biological regulation	65007	0.0054609	74	3243	Biological processes	AT3G03660|AT1G63020|AT3G28920|AT5G61890|AT3G20880|AT3G53480|AT1G74430|AT4G39940|AT1G26870|AT3G47710|AT5G54230|AT3G17185|AT5G60120|AT2G25630|AT5G64960|AT1G61800|AT2G24260|AT1G09530|AT5G03720|AT5G58670|AT1G07390|AT1G18100|AT5G65640|AT5G53950|AT3G53370|AT5G17800|AT4G09570|AT1G69690|AT2G18060|AT1G77110|AT4G30980|AT5G57390|AT1G20340|AT3G26060|AT5G58120|AT3G50820|AT2G41130|AT2G40610|AT1G55580|AT2G34930…
tetrapyrrole metabolic process	33013	0.0058734	6	62	Biological processes	AT3G48280|AT3G03670|AT5G20230|AT1G13110|AT5G66190|AT1G71500|AT2G14100|AT1G17420|AT1G10960|AT3G20100|AT1G19250|AT2G38380|AT2G24820|AT3G48520|AT2G05620|AT1G20340|AT4G37400
response to biotic stimulus	9607	0.0058734	20	550	Biological processes	AT3G56940|AT5G13630|AT3G59400|AT3G51820|AT4G27440|AT1G74470
regulation of cellular process	50794	0.0058734	59	2448	Biological processes	AT2G34930|AT5G66190|AT1G06680|AT5G61890|AT1G17420|AT4G01050|AT2G39200|AT4G36010|AT4G37990|AT3G60160|AT1G01470|AT1G19250|AT5G64960|AT1G61800|AT2G29630|AT3G50970|AT4G12480|AT4G12490|AT4G34131|AT4G12470
regulation of metabolic process	19222	0.0058734	47	1825	Biological processes	AT3G03660|AT1G63020|AT3G28920|AT5G61890|AT3G20880|AT1G74430|AT4G39940|AT1G26870|AT5G54230|AT5G60120|AT1G61800|AT2G24260|AT1G09530|AT5G03720|AT5G58670|AT1G07390|AT5G65640|AT3G53370|AT5G17800|AT4G09570|AT1G69690|AT2G18060|AT4G30980|AT5G57390|AT1G20340|AT3G26060|AT5G58120|AT3G50820|AT2G41130|AT1G55580|AT2G34930|AT5G49300|AT3G54990|AT5G42750|AT5G15210|AT5G45580|AT1G25440|AT1G22490|AT5G50570|AT5G41740…
response to hormone stimulus	9725	0.0058734	25	767	Biological processes	AT3G03660|AT1G55580|AT1G63020|AT5G49300|AT3G54990|AT5G42750|AT5G15210|AT3G28920|AT5G61890|AT3G20880|AT5G45580|AT1G74430|AT4G39940|AT1G25440|AT5G54230|AT3G17185|AT5G60120|AT1G22490|AT1G61800|AT5G50570|AT2G24260|AT1G09530|AT5G03720|AT5G56270|AT1G12980|AT5G21960|AT1G55670|AT1G35560|AT5G65640|AT3G57230|AT3G53370|AT5G17800|AT1G14600|AT4G23550|AT4G17600|AT1G69690|AT1G03800|AT2G18060|AT5G07310|AT5G03790…
electron carrier activity	9055	0.0058734	17	427	Molecular function	AT2G39800|AT5G59845|AT3G53480|AT4G27440|AT1G69260|AT1G26870|AT5G54230|AT1G25560|AT1G72430|AT4G34710|AT3G50970|AT1G09530|AT2G26740|AT5G58670|AT5G59220|AT1G12980|AT5G50720|AT1G18100|AT1G35720|AT5G15960|AT1G31880|AT2G34340|AT1G03800|AT5G01490|AT2G47770
response to radiation	9314	0.0061386	18	471	Biological processes	AT5G20230|AT1G20900|AT3G26490|AT3G26650|AT1G30040|AT5G15960|AT1G15820|AT4G36220|AT1G29920|AT4G10340|AT3G47710|AT1G01470|AT1G25560|AT2G05620|AT1G09530|AT1G20340|AT2G47450|AT3G50820
plastid stroma	9532	0.0062835	15	354	Cellular component	AT4G21280|AT3G26650|AT5G66190|AT1G06680|AT1G67740|AT1G35720|AT1G10960|AT2G47400|AT4G10340|AT4G05180|AT5G54770|AT2G29630|AT1G20340|AT3G26060|AT3G50820
extracellular region	5576	0.0062835	16	393	Cellular component	AT3G54400|AT2G40610|AT3G26650|AT5G66190|AT1G06680|AT3G24770|AT1G35720|AT5G65870|AT1G14720|AT1G29920|AT1G53830|AT4G05180|AT5G01040|AT2G47160|AT1G78060|AT4G39640
2 iron, 2 sulfur cluster binding	51537	0.0077011	3	11	Molecular function	AT2G24820|AT1G71500|AT1G10960
macromolecular complex	32991	0.0079748	41	1552	Cellular component	AT2G34430|AT1G61520|AT4G04640|AT4G21280|AT1G30380|AT1G63020|AT1G67740|AT4G12800|AT3G21055|AT1G31330|AT1G15820|AT4G28750|AT1G29920|AT4G10340|AT4G05180|AT5G54075|AT1G20350|AT1G73860|AT1G07430|AT3G47470|AT2G20260|AT1G79040|AT5G54270|AT1G08380|AT2G34420|AT4G02970|AT4G02770|AT1G06680|AT1G55670|AT1G66160|AT1G29930|AT5G13630|AT3G61470|AT3G16140|AT5G13990|AT5G39785|AT1G52230|AT4G21710|AT2G47450|AT3G50820…
regulation of macromolecule biosynthetic process	10556	0.0080971	40	1504	Biological processes	AT3G03660|AT1G55580|AT1G63020|AT5G49300|AT3G54990|AT5G15210|AT3G28920|AT5G61890|AT3G20880|AT5G45580|AT1G74430|AT1G25440|AT5G54230|AT5G60120|AT1G22490|AT5G50570|AT2G24260|AT5G03720|AT5G56270|AT1G12980|AT5G21960|AT1G35560|AT5G65640|AT3G57230|AT3G53370|AT5G17800|AT1G14600|AT4G23550|AT4G17600|AT1G69690|AT1G03800|AT2G18060|AT5G07310|AT5G03790|AT4G30980|AT5G57390|AT2G28510|AT1G20340|AT2G02060|AT2G41130
response to endogenous stimulus	9719	0.0083072	26	835	Biological processes	AT2G39800|AT5G59845|AT3G53480|AT4G27440|AT1G69260|AT1G74430|AT1G26870|AT5G54230|AT1G25560|AT1G72430|AT4G34710|AT3G50970|AT1G09530|AT2G26740|AT5G58670|AT5G59220|AT1G12980|AT5G50720|AT1G18100|AT1G35720|AT5G15960|AT1G31880|AT2G34340|AT1G03800|AT5G01490|AT2G47770
intracellular	5622	0.0089577	141	7208	Cellular component	AT1G60030|AT3G53480|AT1G12950|AT2G32270|AT4G24570|AT5G45380|AT4G21903|AT5G61730|AT1G20350|AT5G06530|AT2G01320|AT1G28230|AT2G22500|AT1G61800|AT2G47160|AT4G10380|AT3G05155|AT1G66760|AT1G31880|AT1G10540|AT3G60160|AT3G17690|AT5G01490|AT3G16240|AT1G77110|AT5G10180
transmembrane transporter activity	22857	0.0089577	26	840	Molecular function	AT2G39800|AT3G03660|AT1G61520|AT1G63020|AT1G67740|AT4G27440|AT3G04510|AT4G24570|AT4G01050|AT4G39940|AT5G54075|AT1G26870|AT5G60120|AT5G64960|AT1G73860|AT2G24820|AT2G05620|AT1G54780|AT4G35985|AT2G24260|AT5G50670|AT2G28500|AT1G23800|AT5G03720|AT3G47470|AT2G29670|AT1G79040|AT4G04830|AT4G02770|AT3G53130|AT3G26650|AT1G18100|AT5G65640|AT3G53370|AT1G10585|AT5G62530|AT1G52230|AT4G30980|AT3G50820|AT1G29910…
regulation of transcription	45449	0.0091493	39	1468	Biological processes	AT3G03660|AT1G55580|AT1G63020|AT5G49300|AT3G54990|AT5G15210|AT3G28920|AT5G61890|AT3G20880|AT5G45580|AT1G74430|AT1G25440|AT5G54230|AT5G60120|AT1G22490|AT5G50570|AT2G24260|AT5G03720|AT5G56270|AT1G12980|AT5G21960|AT1G35560|AT5G65640|AT3G57230|AT3G53370|AT5G17800|AT1G14600|AT4G23550|AT4G17600|AT1G69690|AT1G03800|AT2G18060|AT5G07310|AT5G03790|AT4G30980|AT5G57390|AT2G28510|AT2G02060|AT2G41130
lateral plasma membrane	16328	0.0091493	2	3	Cellular component	AT1G71697|AT4G09760
choline kinase activity	4103	0.0091493	2	3	Molecular function	AT2G47160|AT4G10380
regulation of macromolecule metabolic process	60255	0.010854	43	1685	Biological processes	AT3G03660|AT1G55580|AT1G63020|AT5G49300|AT3G54990|AT5G15210|AT3G28920|AT5G61890|AT3G20880|AT5G45580|AT1G74430|AT1G25440|AT5G54230|AT3G17185|AT5G60120|AT1G22490|AT5G50570|AT2G24260|AT5G03720|AT5G56270|AT1G12980|AT5G21960|AT1G55670|AT1G35560|AT5G65640|AT3G57230|AT3G53370|AT5G17800|AT1G14600|AT4G23550|AT4G17600|AT1G69690|AT1G03800|AT2G18060|AT5G07310|AT5G03790|AT4G30980|AT5G57390|AT2G28510|AT1G20340…
regulation of gene expression	10468	0.011813	42	1642	Biological processes	AT3G03660|AT1G55580|AT1G63020|AT5G49300|AT3G54990|AT5G15210|AT3G28920|AT5G61890|AT3G20880|AT5G45580|AT1G74430|AT1G25440|AT5G54230|AT3G17185|AT5G60120|AT1G22490|AT5G50570|AT2G24260|AT5G03720|AT5G56270|AT1G12980|AT5G21960|AT1G55670|AT1G35560|AT5G65640|AT3G57230|AT3G53370|AT5G17800|AT1G14600|AT4G23550|AT4G17600|AT1G69690|AT1G03800|AT2G18060|AT5G07310|AT5G03790|AT4G30980|AT5G57390|AT2G28510|AT1G20340…
molecular_function	3674	0.012069	396	24443	Molecular function	AT5G63350|AT2G14100|AT5G19875|AT3G53480|AT4G24570|AT2G37100|AT4G39940|AT1G61800|AT2G05620|AT2G24260|AT4G37400|AT4G34131|AT4G04830|AT1G07390|AT4G27850|AT4G02770|AT3G53130|AT3G06020|AT5G65640|AT1G67470|AT3G53370|AT4G27970|AT1G02810|AT2G25460|AT1G30040|AT3G21790|AT1G71500|AT4G26890|AT1G67480|AT5G24080|AT5G54770|AT1G20350|AT1G53035|AT5G06530|AT1G19250|AT2G30930|AT2G02250|AT5G13180|AT4G10380|AT1G08380…
catalytic activity	3824	0.015398	145	7553	Molecular function	AT2G39800|AT2G28470|AT1G63020|AT1G62290|AT2G14100|AT3G53480|AT4G27440|AT4G39940|AT5G61730|AT2G25630|AT5G64960|AT1G73860|AT1G23480|AT2G24820|AT1G23800|AT1G07430|AT4G37400|AT5G58670|AT4G34131|AT4G04830|AT3G48280|AT3G03670|AT1G78090|AT3G53130|AT3G26650|AT1G71697|AT1G67470|AT1G30730|AT4G09570|AT2G43590|AT1G02810|AT5G62530|AT5G59490|AT2G01670|AT3G13750|AT1G05000|AT2G47550|AT3G50820|AT4G16770|AT5G49900…
multi-organism process	51704	0.01553	22	694	Biological processes	AT2G34930|AT5G66190|AT1G06680|AT5G61890|AT1G17420|AT4G01050|AT2G39200|AT4G36010|AT4G37990|AT3G60160|AT2G25630|AT1G01470|AT1G19250|AT5G64960|AT1G61800|AT2G29630|AT3G50970|AT4G12480|AT4G12490|AT1G61610|AT4G34131|AT4G12470
thiamin biosynthetic process	9228	0.016523	2	4	Biological processes	AT5G54770|AT2G29630
photosynthesis, light harvesting in photosystem I	9768	0.016523	2	4	Biological processes	AT1G08380|AT3G61470
boron transport	46713	0.016523	2	4	Biological processes	AT2G47160|AT4G10380
thiamin and derivative biosynthetic process	42724	0.016523	2	4	Biological processes	AT2G47160|AT4G10380
boron transmembrane transporter activity	46715	0.016523	2	4	Molecular function	AT5G54770|AT2G29630
regulation of nucleobase, nucleoside, nucleotide and nucleic acid metabolic process	19219	0.016999	39	1527	Biological processes	AT3G03660|AT1G55580|AT1G63020|AT5G49300|AT3G54990|AT5G15210|AT3G28920|AT5G61890|AT3G20880|AT5G45580|AT1G74430|AT1G25440|AT5G54230|AT5G60120|AT1G22490|AT5G50570|AT2G24260|AT5G03720|AT5G56270|AT1G12980|AT5G21960|AT1G35560|AT5G65640|AT3G57230|AT3G53370|AT5G17800|AT1G14600|AT4G23550|AT4G17600|AT1G69690|AT1G03800|AT2G18060|AT5G07310|AT5G03790|AT4G30980|AT5G57390|AT2G28510|AT2G02060|AT2G41130
DNA binding	3677	0.017028	52	2207	Molecular function	AT3G03660|AT1G63020|AT3G28920|AT5G61890|AT3G20880|AT2G37100|AT1G74430|AT1G26870|AT3G47710|AT5G54230|AT5G60120|AT2G24260|AT5G50670|AT1G09530|AT5G03720|AT1G20900|AT5G65640|AT5G53950|AT3G53370|AT5G17800|AT1G69690|AT2G18060|AT4G21710|AT4G30980|AT5G57390|AT2G41130|AT1G55580|AT5G49300|AT3G54990|AT5G15210|AT5G45580|AT1G25440|AT1G22490|AT1G25560|AT5G50570|AT5G56270|AT5G13180|AT3G56940|AT1G12980|AT5G21960…
iron-sulfur cluster binding	51536	0.018294	4	33	Molecular function	AT2G24820|AT1G71500|AT2G29630|AT1G10960
metal cluster binding	51540	0.018294	4	33	Molecular function	AT2G24820|AT1G71500|AT2G29630|AT1G10960
electron transport chain	22900	0.019303	5	56	Biological processes	AT4G04640|AT5G66190|AT1G55670|AT2G05620|AT4G01050
apoplast	48046	0.019485	12	286	Cellular component	AT1G29920|AT4G05180|AT3G54400|AT3G26650|AT5G66190|AT1G06680|AT5G01040|AT3G24770|AT1G35720|AT1G78060|AT4G39640|AT1G14720
regulation of nitrogen compound metabolic process	51171	0.019903	39	1545	Biological processes	AT3G03660|AT1G55580|AT1G63020|AT5G49300|AT3G54990|AT5G15210|AT3G28920|AT5G61890|AT3G20880|AT5G45580|AT1G74430|AT1G25440|AT5G54230|AT5G60120|AT1G22490|AT5G50570|AT2G24260|AT5G03720|AT5G56270|AT1G12980|AT5G21960|AT1G35560|AT5G65640|AT3G57230|AT3G53370|AT5G17800|AT1G14600|AT4G23550|AT4G17600|AT1G69690|AT1G03800|AT2G18060|AT5G07310|AT5G03790|AT4G30980|AT5G57390|AT2G28510|AT2G02060|AT2G41130
oxidoreductase activity, acting on the aldehyde or oxo group of donors, NAD or NADP as acceptor	16620	0.0221	4	35	Molecular function	AT2G39800|AT5G62530|AT3G26650|AT1G23800
poly(U) RNA binding	8266	0.02294	3	17	Molecular function	AT5G66190|AT1G06680|AT3G50820
poly-pyrimidine tract binding	8187	0.02294	3	17	Molecular function	AT5G66190|AT1G06680|AT3G50820
defense response	6952	0.024467	20	637	Biological processes	AT3G54420|AT2G34930|AT5G66190|AT1G06680|AT2G35930|AT5G61890|AT1G17420|AT4G09420|AT4G01050|AT2G39200|AT1G66090|AT4G37990|AT1G01470|AT1G19250|AT4G14370|AT3G50970|AT4G12480|AT5G58120|AT4G12490|AT4G12470
protein amino acid glutathionylation	10731	0.024467	2	5	Biological processes	AT1G75270|AT5G02780
photosynthetic electron transport in photosystem II	9772	0.024467	2	5	Biological processes	AT4G04640|AT4G01050
cellular nitrogen compound biosynthetic process	44271	0.025151	14	378	Biological processes	AT3G56940|AT2G39800|AT4G04640|AT1G56430|AT3G59400|AT4G27440|AT3G25900|AT4G22570|AT5G13630|AT5G54770|AT2G29630|AT4G34710|AT3G51820|AT1G74470
oxidoreductase activity, acting on paired donors, with incorporation or reduction of molecular oxygen, NADH or NADPH as one donor, and incorporation of one atom of oxygen	16709	0.025734	4	37	Molecular function	AT3G56940|AT1G19250|AT4G36380|AT1G12140
monooxygenase activity	4497	0.02667	12	300	Molecular function	AT4G36220|AT3G48280|AT3G56940|AT1G12130|AT3G20100|AT1G13110|AT1G19250|AT4G36380|AT1G12140|AT3G48520|AT2G14100|AT4G37400
regulation of photosynthesis	10109	0.030245	3	19	Biological processes	AT1G55670|AT1G61800|AT3G50820
gibberellin catabolic process	45487	0.033432	2	6	Biological processes	AT1G30040|AT5G13790
thiamin metabolic process	6772	0.033432	2	6	Biological processes	AT5G54770|AT2G29630
thiamin and derivative metabolic process	42723	0.033432	2	6	Biological processes	AT3G16240|AT5G45380
diterpenoid catabolic process	16103	0.033432	2	6	Biological processes	AT5G54770|AT2G29630
nonphotochemical quenching	10196	0.033432	2	6	Biological processes	AT1G30040|AT5G13790
urea transmembrane transporter activity	15204	0.033432	2	6	Molecular function	AT3G16240|AT5G45380
amide transmembrane transporter activity	42887	0.033432	2	6	Molecular function	AT4G10340|AT1G15820
response to high light intensity	9644	0.041511	4	43	Biological processes	AT1G01470|AT2G05620|AT2G47450|AT3G50820
response to wounding	9611	0.044786	7	133	Biological processes	AT5G20230|AT1G01470|AT1G66760|AT5G14780|AT4G34710|AT1G17420|AT1G71697

## Sheet: GO slim raw
File created with bingo (c) on 13/08/2020 at 22:11:59
ontology: namespace
curator: bingo
Selected ontology file : bundle://113.0:1/data/GOSlim_Plants
Selected annotation file : bundle://113.0:1/data/A_thaliana_default
Discarded evidence codes :
Overrepresentation
Selected statistical test : Hypergeometric test
Selected correction : Benjamini & Hochberg False Discovery Rate (FDR) correction
Selected significance level : 0.05
Testing option : Use whole annotation as reference set
The selected cluster :
AT5G43980	AT5G63350	AT2G14100	AT5G19875	AT3G53480	AT4G24570	AT2G37100	AT4G39940	AT1G61800	AT2G05620	AT2G24260	AT2G28500	AT4G37400	AT4G34131	AT4G04830	AT1G07390	AT4G27850	AT4G02770	AT3G53130	AT3G06020	AT5G65640	AT1G67470	AT3G53370	AT4G27970	AT1G10585	AT1G02810	AT2G25460	AT2G40610	AT1G30040	AT3G21790	AT1G71500	AT4G26890	AT1G67480	AT5G24080	AT5G54770	AT1G20350	AT1G53035	AT5G06530	AT1G19250	AT2G30930	AT2G02250	AT5G13180	AT4G10380	AT1G08380	AT4G00210	AT1G12980	AT3G53470	AT1G80450	AT2G45080	AT1G35720
AT4G34710	AT5G56270	AT1G06520	AT5G66190	AT3G50760	AT3G02480	AT5G23660	AT4G04490	AT3G27400	AT5G13630	AT5G13990	AT1G06990	AT3G48690	AT3G49580	AT2G34430	AT5G61890	AT5G06080	AT5G11420	AT3G18950	AT5G56050	AT2G20260	AT1G63750	AT2G47630	AT3G61470	AT2G18060	AT2G01990	AT5G57390	AT1G05320	AT5G40720	AT5G58120	AT4G17660	AT4G04223	AT2G34655	AT5G49300	AT1G17420	AT2G44450	AT2G24762	AT1G28670	AT4G31000	AT5G59220	AT5G01840	AT2G34420	AT5G20230	AT3G26470	AT3G50440	AT1G06680	AT3G28899	AT5G07280	AT4G04570	AT5G11410
No annotations were retrieved for the following entities:
AT3G20300	AT5G57780	AT2G44370	AT1G08440	AT2G01422	AT5G17650	AT3G28899	AT4G35510	AT5G21280	AT2G15040	AT5G42280
GO-ID	p-value	corr p-value	x	n	X	N	Description	Genes in test set
15979	5.2015e-33	3.465e-31	33	113	438	27594	photosynthesis	AT2G34430|AT1G61520|AT4G04640|AT1G30380|AT2G06520|AT1G67740|AT4G12800|AT1G31330|AT1G15820|AT4G01050|AT1G29920|AT4G10340|AT1G61800|AT2G05620|AT1G54780|AT3G47470|AT2G20260|AT1G79040|AT5G54270|AT1G08380|AT3G56940|AT2G34420|AT4G02770|AT3G26650|AT5G66190|AT1G06680|AT1G55670|AT1G29930|AT3G61470|AT3G16140|AT1G52230|AT3G50820|AT1G29910
9579	7.7864e-33	3.465e-31	48	322	438	27594	thylakoid	AT2G34430|AT1G61520|AT4G04640|AT4G21280|AT1G30380|AT2G06520|AT1G67740|AT5G14780|AT1G71500|AT4G12800|AT3G21055|AT1G31330|AT4G27440|AT1G15820|AT2G30570|AT4G01050|AT4G28750|AT1G29920|AT4G10340|AT4G05180|AT5G54770|AT2G05620|AT1G54780|AT3G51820|AT3G26070|AT3G47470|AT2G20260|AT1G79040|AT5G54270|AT1G08380|AT3G56940|AT2G34420|AT4G02770|AT3G26650|AT5G66190|AT1G06680|AT1G55670|AT1G35720|AT4G17600|AT1G29930…
9536	9.3417e-14	2.7714e-12	80	2139	438	27594	plastid	AT1G10370|AT2G34430|AT2G39800|AT3G03660|AT1G61520|AT4G04640|AT1G30380|AT2G06520|AT1G67740|AT5G14780|AT3G21055|AT4G27440|AT3G04510|AT1G15820|AT4G01050|AT4G39940|AT4G05180|AT1G73860|AT2G24820|AT2G05620|AT1G54780|AT4G35985|AT2G29630|AT3G51820|AT2G28500|AT3G26070|AT3G47470|AT2G29670|AT2G20260|AT1G79040|AT5G54270|AT4G02770|AT3G53130|AT5G14370|AT3G26650|AT3G24430|AT5G19940|AT3G61470|AT5G62530|AT3G16140…
16020	1.4528e-09	3.2325e-08	103	3727	438	27594	membrane	AT1G60030|AT2G39800|AT5G41280|AT1G61520|AT1G67740|AT5G43980|AT3G53480|AT4G27440|AT4G24570|AT4G01050|AT4G21903|AT5G61730|AT1G61800|AT2G05620|AT1G54780|AT3G47470|AT1G79040|AT4G02770|AT3G26490|AT1G65730|AT3G26650|AT4G27970|AT5G41290|AT1G52230|AT3G50820|AT1G29910|AT5G49900|AT1G71500|AT4G22730|AT2G32270|AT5G45380|AT1G20350|AT1G19250|AT1G28230|AT3G13520|AT4G10380|AT1G06520|AT1G08380|AT5G66190|AT1G55670…
6091	2.2032e-09	3.9218e-08	18	199	438	27594	generation of precursor metabolites and energy	AT1G08380|AT2G34420|AT2G34430|AT1G61520|AT4G04640|AT3G26650|AT5G66190|AT1G06680|AT1G55670|AT4G12800|AT4G01050|AT5G58330|AT3G61470|AT2G05620|AT1G54780|AT3G50820|AT1G79040|AT1G29910
5618	2.3208e-07	3.4426e-06	24	458	438	27594	cell wall	AT3G54420|AT3G03670|AT2G28470|AT3G54400|AT4G02330|AT2G41800|AT5G43980|AT5G25460|AT1G35720|AT2G16430|AT1G14720|AT2G38870|AT2G44450|AT1G53830|AT1G21670|AT1G02810|AT2G25630|AT2G38380|AT3G47400|AT3G16240|AT3G13750|AT2G47550|AT1G78060|AT4G39640
30312	2.7173e-07	3.4549e-06	24	462	438	27594	external encapsulating structure	AT3G54420|AT3G03670|AT2G28470|AT3G54400|AT4G02330|AT2G41800|AT5G43980|AT5G25460|AT1G35720|AT2G16430|AT1G14720|AT2G38870|AT2G44450|AT1G53830|AT1G21670|AT1G02810|AT2G25630|AT2G38380|AT3G47400|AT3G16240|AT3G13750|AT2G47550|AT1G78060|AT4G39640
5623	1.7872e-06	1.9883e-05	228	11708	438	27594	cell	AT1G60030|AT3G03660|AT5G43980|AT2G14100|AT3G53480|AT3G04510|AT4G24570|AT4G39940|AT5G61730|AT5G54075|AT2G24820|AT1G61800|AT2G05620|AT2G24260|AT2G28500|AT5G03720|AT3G47470|AT4G34131|AT4G04830|AT3G03670|AT4G02770|AT3G53130|AT1G65730|AT5G50720|AT3G26650|AT5G65640|AT3G53370|AT4G27970|AT1G10585|AT1G30730|AT2G43590|AT1G02810|AT3G12145|AT2G40610|AT1G71500|AT4G22730|AT3G25597|AT5G45380|AT1G53830|AT5G54770…
5737	1.8287e-05	0.00018084	107	4745	438	27594	cytoplasm	AT2G39800|AT3G03660|AT1G61520|AT1G67740|AT4G27440|AT3G04510|AT4G24570|AT4G01050|AT4G39940|AT5G64960|AT1G73860|AT2G24820|AT2G05620|AT1G54780|AT4G35985|AT2G28500|AT1G23800|AT3G47470|AT2G29670|AT1G79040|AT4G04830|AT4G02770|AT3G53130|AT3G26650|AT5G62530|AT1G52230|AT3G50820|AT1G29910|AT4G16770|AT1G71500|AT4G22570|AT2G47400|AT5G54770|AT1G20350|AT1G19250|AT1G06520|AT1G08380|AT1G12980|AT5G66190|AT1G55670…
3700	3.438e-05	0.00030598	45	1547	438	27594	transcription factor activity	AT3G03660|AT1G55580|AT5G49300|AT3G54990|AT5G15210|AT3G28920|AT5G61890|AT3G20880|AT5G45580|AT1G74430|AT1G25440|AT1G26870|AT3G47710|AT5G54230|AT5G60120|AT1G22490|AT1G25560|AT5G50570|AT2G24260|AT1G09530|AT5G03720|AT5G56270|AT5G13180|AT1G12980|AT5G21960|AT1G35560|AT5G65640|AT5G53950|AT5G58900|AT3G57230|AT5G17800|AT1G14600|AT4G23550|AT4G17600|AT1G69690|AT1G03800|AT2G18060|AT5G07310|AT5G03790|AT5G13790…
9628	6.9256e-05	0.00056035	36	1168	438	27594	response to abiotic stimulus	AT2G39800|AT1G30040|AT1G16850|AT1G15820|AT1G29920|AT4G10340|AT3G47710|AT5G54230|AT5G54770|AT1G01470|AT2G38380|AT1G25560|AT2G05620|AT4G34710|AT3G50970|AT1G09530|AT2G26740|AT5G03720|AT5G58670|AT5G59220|AT5G20230|AT1G20900|AT3G26490|AT5G50720|AT3G26650|AT2G35930|AT3G02480|AT1G35720|AT2G18950|AT5G15960|AT4G36220|AT5G62530|AT1G20340|AT2G47770|AT2G47450|AT3G50820
6950	0.00016018	0.001188	49	1853	438	27594	response to stress	AT2G39800|AT5G14780|AT5G61890|AT5G19875|AT4G01050|AT2G39200|AT5G54230|AT2G05620|AT3G50970|AT5G03720|AT5G58670|AT3G54420|AT3G03670|AT5G50720|AT3G26650|AT2G35930|AT1G71697|AT5G62530|AT3G13750|AT5G58120|AT4G12490|AT2G34930|AT1G17420|AT1G16850|AT5G45380|AT5G54770|AT1G01470|AT1G19250|AT2G38380|AT4G34710|AT2G26740|AT4G12480|AT5G59220|AT4G39640|AT5G20230|AT5G66190|AT1G06680|AT1G66760|AT3G02480|AT1G35720…
30528	0.00031574	0.0021616	46	1756	438	27594	transcription regulator activity	AT3G03660|AT1G55580|AT5G49300|AT3G54990|AT5G15210|AT3G28920|AT5G61890|AT3G20880|AT5G45580|AT1G74430|AT1G25440|AT1G26870|AT3G47710|AT5G54230|AT5G60120|AT1G22490|AT1G25560|AT5G50570|AT2G24260|AT1G09530|AT5G03720|AT5G56270|AT5G13180|AT5G01840|AT1G12980|AT5G21960|AT1G35560|AT5G65640|AT5G53950|AT5G58900|AT3G57230|AT5G17800|AT1G14600|AT4G23550|AT4G17600|AT1G69690|AT1G03800|AT2G18060|AT5G07310|AT5G03790…
9607	0.00038931	0.0024749	20	550	438	27594	response to biotic stimulus	AT2G34930|AT5G66190|AT1G06680|AT5G61890|AT1G17420|AT4G01050|AT2G39200|AT4G36010|AT4G37990|AT3G60160|AT1G01470|AT1G19250|AT5G64960|AT1G61800|AT2G29630|AT3G50970|AT4G12480|AT4G12490|AT4G34131|AT4G12470
5576	0.00044087	0.0026158	16	393	438	27594	extracellular region	AT3G54400|AT2G40610|AT3G26650|AT5G66190|AT1G06680|AT3G24770|AT1G35720|AT5G65870|AT1G14720|AT1G29920|AT1G53830|AT4G05180|AT5G01040|AT2G47160|AT1G78060|AT4G39640
9719	0.0006074	0.0033786	26	835	438	27594	response to endogenous stimulus	AT2G39800|AT5G59845|AT3G53480|AT4G27440|AT1G69260|AT1G74430|AT1G26870|AT5G54230|AT1G25560|AT1G72430|AT4G34710|AT3G50970|AT1G09530|AT2G26740|AT5G58670|AT5G59220|AT1G12980|AT5G50720|AT1G18100|AT1G35720|AT5G15960|AT1G31880|AT2G34340|AT1G03800|AT5G01490|AT2G47770
5622	0.00066819	0.0034982	141	7208	438	27594	intracellular	AT2G39800|AT3G03660|AT1G61520|AT1G63020|AT1G67740|AT4G27440|AT3G04510|AT4G24570|AT4G01050|AT4G39940|AT5G54075|AT1G26870|AT5G60120|AT5G64960|AT1G73860|AT2G24820|AT2G05620|AT1G54780|AT4G35985|AT2G24260|AT5G50670|AT2G28500|AT1G23800|AT5G03720|AT3G47470|AT2G29670|AT1G79040|AT4G04830|AT4G02770|AT3G53130|AT3G26650|AT1G18100|AT5G65640|AT3G53370|AT1G10585|AT5G62530|AT1G52230|AT4G30980|AT3G50820|AT1G29910…
3674	0.00095373	0.0047156	396	24443	438	27594	molecular_function	AT5G63350|AT2G14100|AT5G19875|AT3G53480|AT4G24570|AT2G37100|AT4G39940|AT1G61800|AT2G05620|AT2G24260|AT4G37400|AT4G34131|AT4G04830|AT1G07390|AT4G27850|AT4G02770|AT3G53130|AT3G06020|AT5G65640|AT1G67470|AT3G53370|AT4G27970|AT1G02810|AT2G25460|AT1G30040|AT3G21790|AT1G71500|AT4G26890|AT1G67480|AT5G24080|AT5G54770|AT1G20350|AT1G53035|AT5G06530|AT1G19250|AT2G30930|AT2G02250|AT5G13180|AT4G10380|AT1G08380…
3824	0.0012282	0.0057531	145	7553	438	27594	catalytic activity	AT2G39800|AT2G28470|AT1G63020|AT1G62290|AT2G14100|AT3G53480|AT4G27440|AT4G39940|AT5G61730|AT2G25630|AT5G64960|AT1G73860|AT1G23480|AT2G24820|AT1G23800|AT1G07430|AT4G37400|AT5G58670|AT4G34131|AT4G04830|AT3G48280|AT3G03670|AT1G78090|AT3G53130|AT3G26650|AT1G71697|AT1G67470|AT1G30730|AT4G09570|AT2G43590|AT1G02810|AT5G62530|AT5G59490|AT2G01670|AT3G13750|AT1G05000|AT2G47550|AT3G50820|AT4G16770|AT5G49900…
3677	0.0014588	0.0064917	52	2207	438	27594	DNA binding	AT3G03660|AT1G63020|AT3G28920|AT5G61890|AT3G20880|AT2G37100|AT1G74430|AT1G26870|AT3G47710|AT5G54230|AT5G60120|AT2G24260|AT5G50670|AT1G09530|AT5G03720|AT1G20900|AT5G65640|AT5G53950|AT3G53370|AT5G17800|AT1G69690|AT2G18060|AT4G21710|AT4G30980|AT5G57390|AT2G41130|AT1G55580|AT5G49300|AT3G54990|AT5G15210|AT5G45580|AT1G25440|AT1G22490|AT1G25560|AT5G50570|AT5G56270|AT5G13180|AT3G56940|AT1G12980|AT5G21960…
16265	0.0053183	0.021428	9	209	438	27594	death	AT3G54420|AT1G66090|AT1G63750|AT4G37990|AT1G19250|AT5G41740|AT4G09420|AT5G58120|AT2G39200
8219	0.0053183	0.021428	9	209	438	27594	cell death	AT3G54420|AT1G66090|AT1G63750|AT4G37990|AT1G19250|AT5G41740|AT4G09420|AT5G58120|AT2G39200
8289	0.0055375	0.021428	8	173	438	27594	lipid binding	AT2G44290|AT1G18100|AT3G22120|AT1G35720|AT4G14370|AT4G12480|AT4G12490|AT4G12470
5215	0.0091333	0.033869	28	1125	438	27594	transporter activity	AT1G60030|AT3G53480|AT1G12950|AT2G32270|AT4G24570|AT5G45380|AT4G21903|AT5G61730|AT1G20350|AT5G06530|AT2G01320|AT1G28230|AT2G22500|AT1G61800|AT2G47160|AT4G10380|AT1G65730|AT3G05155|AT1G66760|AT1G31880|AT1G10540|AT4G27970|AT3G60160|AT3G17690|AT5G01490|AT3G16240|AT1G77110|AT5G10180
[truncated: 205 more columns]

## Sheet: Go slim
Description	GO-ID	corr p-value	x	n
photosynthesis	15979	3.465e-31	33	113	Biological processes	AT2G34430|AT1G61520|AT4G04640|AT1G30380|AT2G06520|AT1G67740|AT4G12800|AT1G31330|AT1G15820|AT4G01050|AT1G29920|AT4G10340|AT1G61800|AT2G05620|AT1G54780|AT3G47470|AT2G20260|AT1G79040|AT5G54270|AT1G08380|AT3G56940|AT2G34420|AT4G02770|AT3G26650|AT5G66190|AT1G06680|AT1G55670|AT1G29930|AT3G61470|AT3G16140|AT1G52230|AT3G50820|AT1G29910
thylakoid	9579	3.465e-31	48	322	Cellular component	AT2G34430|AT1G61520|AT4G04640|AT4G21280|AT1G30380|AT2G06520|AT1G67740|AT5G14780|AT1G71500|AT4G12800|AT3G21055|AT1G31330|AT4G27440|AT1G15820|AT2G30570|AT4G01050|AT4G28750|AT1G29920|AT4G10340|AT4G05180|AT5G54770|AT2G05620|AT1G54780|AT3G51820|AT3G26070|AT3G47470|AT2G20260|AT1G79040|AT5G54270|AT1G08380|AT3G56940|AT2G34420|AT4G02770|AT3G26650|AT5G66190|AT1G06680|AT1G55670|AT1G35720|AT4G17600|AT1G29930…
plastid	9536	2.7714e-12	80	2139	Cellular component	AT1G10370|AT2G34430|AT2G39800|AT3G03660|AT1G61520|AT4G04640|AT1G30380|AT2G06520|AT1G67740|AT5G14780|AT3G21055|AT4G27440|AT3G04510|AT1G15820|AT4G01050|AT4G39940|AT4G05180|AT1G73860|AT2G24820|AT2G05620|AT1G54780|AT4G35985|AT2G29630|AT3G51820|AT2G28500|AT3G26070|AT3G47470|AT2G29670|AT2G20260|AT1G79040|AT5G54270|AT4G02770|AT3G53130|AT5G14370|AT3G26650|AT3G24430|AT5G19940|AT3G61470|AT5G62530|AT3G16140…
membrane	16020	3.2325e-08	103	3727	Cellular component	AT1G60030|AT2G39800|AT5G41280|AT1G61520|AT1G67740|AT5G43980|AT3G53480|AT4G27440|AT4G24570|AT4G01050|AT4G21903|AT5G61730|AT1G61800|AT2G05620|AT1G54780|AT3G47470|AT1G79040|AT4G02770|AT3G26490|AT1G65730|AT3G26650|AT4G27970|AT5G41290|AT1G52230|AT3G50820|AT1G29910|AT5G49900|AT1G71500|AT4G22730|AT2G32270|AT5G45380|AT1G20350|AT1G19250|AT1G28230|AT3G13520|AT4G10380|AT1G06520|AT1G08380|AT5G66190|AT1G55670…
generation of precursor metabolites and energy	6091	3.9218e-08	18	199	Biological processes	AT1G08380|AT2G34420|AT2G34430|AT1G61520|AT4G04640|AT3G26650|AT5G66190|AT1G06680|AT1G55670|AT4G12800|AT4G01050|AT5G58330|AT3G61470|AT2G05620|AT1G54780|AT3G50820|AT1G79040|AT1G29910
cell wall	5618	3.4426e-06	24	458	Cellular component	AT3G54420|AT3G03670|AT2G28470|AT3G54400|AT4G02330|AT2G41800|AT5G43980|AT5G25460|AT1G35720|AT2G16430|AT1G14720|AT2G38870|AT2G44450|AT1G53830|AT1G21670|AT1G02810|AT2G25630|AT2G38380|AT3G47400|AT3G16240|AT3G13750|AT2G47550|AT1G78060|AT4G39640
external encapsulating structure	30312	3.4549e-06	24	462	Cellular component	AT3G54420|AT3G03670|AT2G28470|AT3G54400|AT4G02330|AT2G41800|AT5G43980|AT5G25460|AT1G35720|AT2G16430|AT1G14720|AT2G38870|AT2G44450|AT1G53830|AT1G21670|AT1G02810|AT2G25630|AT2G38380|AT3G47400|AT3G16240|AT3G13750|AT2G47550|AT1G78060|AT4G39640
cell	5623	1.9883e-05	228	11708	Cellular component	AT1G60030|AT3G03660|AT5G43980|AT2G14100|AT3G53480|AT3G04510|AT4G24570|AT4G39940|AT5G61730|AT5G54075|AT2G24820|AT1G61800|AT2G05620|AT2G24260|AT2G28500|AT5G03720|AT3G47470|AT4G34131|AT4G04830|AT3G03670|AT4G02770|AT3G53130|AT1G65730|AT5G50720|AT3G26650|AT5G65640|AT3G53370|AT4G27970|AT1G10585|AT1G30730|AT2G43590|AT1G02810|AT3G12145|AT2G40610|AT1G71500|AT4G22730|AT3G25597|AT5G45380|AT1G53830|AT5G54770…
cytoplasm	5737	0.00018084	107	4745	Cellular component	AT2G39800|AT3G03660|AT1G61520|AT1G67740|AT4G27440|AT3G04510|AT4G24570|AT4G01050|AT4G39940|AT5G64960|AT1G73860|AT2G24820|AT2G05620|AT1G54780|AT4G35985|AT2G28500|AT1G23800|AT3G47470|AT2G29670|AT1G79040|AT4G04830|AT4G02770|AT3G53130|AT3G26650|AT5G62530|AT1G52230|AT3G50820|AT1G29910|AT4G16770|AT1G71500|AT4G22570|AT2G47400|AT5G54770|AT1G20350|AT1G19250|AT1G06520|AT1G08380|AT1G12980|AT5G66190|AT1G55670…
transcription factor activity	3700	0.00030598	45	1547	Molecular function	AT3G03660|AT1G55580|AT5G49300|AT3G54990|AT5G15210|AT3G28920|AT5G61890|AT3G20880|AT5G45580|AT1G74430|AT1G25440|AT1G26870|AT3G47710|AT5G54230|AT5G60120|AT1G22490|AT1G25560|AT5G50570|AT2G24260|AT1G09530|AT5G03720|AT5G56270|AT5G13180|AT1G12980|AT5G21960|AT1G35560|AT5G65640|AT5G53950|AT5G58900|AT3G57230|AT5G17800|AT1G14600|AT4G23550|AT4G17600|AT1G69690|AT1G03800|AT2G18060|AT5G07310|AT5G03790|AT5G13790…
response to abiotic stimulus	9628	0.00056035	36	1168	Biological processes	AT2G39800|AT1G30040|AT1G16850|AT1G15820|AT1G29920|AT4G10340|AT3G47710|AT5G54230|AT5G54770|AT1G01470|AT2G38380|AT1G25560|AT2G05620|AT4G34710|AT3G50970|AT1G09530|AT2G26740|AT5G03720|AT5G58670|AT5G59220|AT5G20230|AT1G20900|AT3G26490|AT5G50720|AT3G26650|AT2G35930|AT3G02480|AT1G35720|AT2G18950|AT5G15960|AT4G36220|AT5G62530|AT1G20340|AT2G47770|AT2G47450|AT3G50820
response to stress	6950	0.001188	49	1853	Biological processes	AT2G39800|AT5G14780|AT5G61890|AT5G19875|AT4G01050|AT2G39200|AT5G54230|AT2G05620|AT3G50970|AT5G03720|AT5G58670|AT3G54420|AT3G03670|AT5G50720|AT3G26650|AT2G35930|AT1G71697|AT5G62530|AT3G13750|AT5G58120|AT4G12490|AT2G34930|AT1G17420|AT1G16850|AT5G45380|AT5G54770|AT1G01470|AT1G19250|AT2G38380|AT4G34710|AT2G26740|AT4G12480|AT5G59220|AT4G39640|AT5G20230|AT5G66190|AT1G06680|AT1G66760|AT3G02480|AT1G35720…
transcription regulator activity	30528	0.0021616	46	1756	Molecular function	AT3G03660|AT1G55580|AT5G49300|AT3G54990|AT5G15210|AT3G28920|AT5G61890|AT3G20880|AT5G45580|AT1G74430|AT1G25440|AT1G26870|AT3G47710|AT5G54230|AT5G60120|AT1G22490|AT1G25560|AT5G50570|AT2G24260|AT1G09530|AT5G03720|AT5G56270|AT5G13180|AT5G01840|AT1G12980|AT5G21960|AT1G35560|AT5G65640|AT5G53950|AT5G58900|AT3G57230|AT5G17800|AT1G14600|AT4G23550|AT4G17600|AT1G69690|AT1G03800|AT2G18060|AT5G07310|AT5G03790…
response to biotic stimulus	9607	0.0024749	20	550	Biological processes	AT2G34930|AT5G66190|AT1G06680|AT5G61890|AT1G17420|AT4G01050|AT2G39200|AT4G36010|AT4G37990|AT3G60160|AT1G01470|AT1G19250|AT5G64960|AT1G61800|AT2G29630|AT3G50970|AT4G12480|AT4G12490|AT4G34131|AT4G12470
extracellular region	5576	0.0026158	16	393	Cellular component	AT3G54400|AT2G40610|AT3G26650|AT5G66190|AT1G06680|AT3G24770|AT1G35720|AT5G65870|AT1G14720|AT1G29920|AT1G53830|AT4G05180|AT5G01040|AT2G47160|AT1G78060|AT4G39640
response to endogenous stimulus	9719	0.0033786	26	835	Biological processes	AT2G39800|AT5G59845|AT3G53480|AT4G27440|AT1G69260|AT1G74430|AT1G26870|AT5G54230|AT1G25560|AT1G72430|AT4G34710|AT3G50970|AT1G09530|AT2G26740|AT5G58670|AT5G59220|AT1G12980|AT5G50720|AT1G18100|AT1G35720|AT5G15960|AT1G31880|AT2G34340|AT1G03800|AT5G01490|AT2G47770
intracellular	5622	0.0034982	141	7208	Cellular component	AT2G39800|AT3G03660|AT1G61520|AT1G63020|AT1G67740|AT4G27440|AT3G04510|AT4G24570|AT4G01050|AT4G39940|AT5G54075|AT1G26870|AT5G60120|AT5G64960|AT1G73860|AT2G24820|AT2G05620|AT1G54780|AT4G35985|AT2G24260|AT5G50670|AT2G28500|AT1G23800|AT5G03720|AT3G47470|AT2G29670|AT1G79040|AT4G04830|AT4G02770|AT3G53130|AT3G26650|AT1G18100|AT5G65640|AT3G53370|AT1G10585|AT5G62530|AT1G52230|AT4G30980|AT3G50820|AT1G29910…
molecular_function	3674	0.0047156	396	24443	Molecular function	AT5G63350|AT2G14100|AT5G19875|AT3G53480|AT4G24570|AT2G37100|AT4G39940|AT1G61800|AT2G05620|AT2G24260|AT4G37400|AT4G34131|AT4G04830|AT1G07390|AT4G27850|AT4G02770|AT3G53130|AT3G06020|AT5G65640|AT1G67470|AT3G53370|AT4G27970|AT1G02810|AT2G25460|AT1G30040|AT3G21790|AT1G71500|AT4G26890|AT1G67480|AT5G24080|AT5G54770|AT1G20350|AT1G53035|AT5G06530|AT1G19250|AT2G30930|AT2G02250|AT5G13180|AT4G10380|AT1G08380…
catalytic activity	3824	0.0057531	145	7553	Molecular function	AT2G39800|AT2G28470|AT1G63020|AT1G62290|AT2G14100|AT3G53480|AT4G27440|AT4G39940|AT5G61730|AT2G25630|AT5G64960|AT1G73860|AT1G23480|AT2G24820|AT1G23800|AT1G07430|AT4G37400|AT5G58670|AT4G34131|AT4G04830|AT3G48280|AT3G03670|AT1G78090|AT3G53130|AT3G26650|AT1G71697|AT1G67470|AT1G30730|AT4G09570|AT2G43590|AT1G02810|AT5G62530|AT5G59490|AT2G01670|AT3G13750|AT1G05000|AT2G47550|AT3G50820|AT4G16770|AT5G49900…
DNA binding	3677	0.0064917	52	2207	Molecular function	AT3G03660|AT1G63020|AT3G28920|AT5G61890|AT3G20880|AT2G37100|AT1G74430|AT1G26870|AT3G47710|AT5G54230|AT5G60120|AT2G24260|AT5G50670|AT1G09530|AT5G03720|AT1G20900|AT5G65640|AT5G53950|AT3G53370|AT5G17800|AT1G69690|AT2G18060|AT4G21710|AT4G30980|AT5G57390|AT2G41130|AT1G55580|AT5G49300|AT3G54990|AT5G15210|AT5G45580|AT1G25440|AT1G22490|AT1G25560|AT5G50570|AT5G56270|AT5G13180|AT3G56940|AT1G12980|AT5G21960…
death	16265	0.021428	9	209	Biological processes	AT3G54420|AT1G66090|AT1G63750|AT4G37990|AT1G19250|AT5G41740|AT4G09420|AT5G58120|AT2G39200
cell death	8219	0.021428	9	209	Biological processes	AT3G54420|AT1G66090|AT1G63750|AT4G37990|AT1G19250|AT5G41740|AT4G09420|AT5G58120|AT2G39200
lipid binding	8289	0.021428	8	173	Molecular function	AT2G44290|AT1G18100|AT3G22120|AT1G35720|AT4G14370|AT4G12480|AT4G12490|AT4G12470
transporter activity	5215	0.033869	28	1125	Molecular function	AT1G60030|AT3G53480|AT1G12950|AT2G32270|AT4G24570|AT5G45380|AT4G21903|AT5G61730|AT1G20350|AT5G06530|AT2G01320|AT1G28230|AT2G22500|AT1G61800|AT2G47160|AT4G10380|AT1G65730|AT3G05155|AT1G66760|AT1G31880|AT1G10540|AT4G27970|AT3G60160|AT3G17690|AT5G01490|AT3G16240|AT1G77110|AT5G10180
