# Supplementary material for: H3K27me3 epigenetic mark crucial for callus cell identity and regeneration capacity
Source: Research Square preprint supplement (doi:10.21203/rs.3.rs-5582331/v1), 2025-01-24
Supplement: Supplementary file 10 [file b77bcd1b13093b8463a46f56.xlsx]

## Sheet: emf2 callus expressed genes
Supplementary Data 8 emf2 callus expressed genes
Columns C,D,E show mRNA levels (in RPKM:Reads Per Kilobase of transcripts per Million mappesd reads) of callus derived from emf2-1 cotyledonas in three biological replicates. Column F is the mean.
A gene was considerd expressed if mean_RPKM > 1
Gene.ID	gene.name	emf2_RPKM_rep1	emf2_RPKM_rep2	emf2_RPKM_rep3	emf2_mean_RPKM
AT1G01010	NAC DOMAIN CONTAINING PROTEIN 1 (NAC001)	23.0638	24.24	35.5903	27.6314
AT1G01020	(ARV1)	5.0249	4.96678	5.34124	5.11097
AT1G01030	NGATHA3 (NGA3)	1.40544	1.93011	1.72734	1.68763
AT1G01040	DICER-LIKE 1 (DCL1)	9.22816	9.40797	9.38631	9.34081
AT1G01046	MICRORNA838A (MIR838A)	4.80934	6.67354	6.00939	5.83075
AT1G01050	PYROPHOSPHORYLASE 1 (PPa1)	23.4248	24.9872	24.2469	24.2196
AT1G01060	LATE ELONGATED HYPOCOTYL (LHY)	8.72237	6.41663	9.42554	8.18818
AT1G01070	nodulin MtN21 /EamA-like transporter family protein	3.32147	2.2989	3.4499	3.02342
AT1G01080	RNA-binding (RRM/RBD/RNP motifs) family protein	4.1673	4.06427	3.33567	3.85575
AT1G01090	PYRUVATE DEHYDROGENASE E1 ALPHA (PDH-E1 ALPHA)	36.6557	38.4093	34.8099	36.625
AT1G01100	60S acidic ribosomal protein family	215.33	211.938	234.142	220.47
AT1G01110	IQ-DOMAIN 18 (IQD18)	1.57538	1.99056	1.79494	1.78696
AT1G01120	3-KETOACYL-COA SYNTHASE 1 (KCS1)	40.7684	18.1412	32.57	30.4932
AT1G01130	CBL-interacting Serine/Threonine-kinase	1.55742	0.814012	0.8234	1.06494
AT1G01140	CBL-INTERACTING PROTEIN KINASE 9 (CIPK9)	1.96613	1.81517	3.37714	2.38615
AT1G01160	GRF1-INTERACTING FACTOR 2 (GIF2)	24.3032	27.4217	27.8512	26.5254
AT1G01170	ozone-responsive stress-like protein (DUF1138)	1.50091	6.31778	0.808625	2.87577
AT1G01200	RAB GTPASE HOMOLOG A3 (RABA3)	1.76762	1.17352	1.44032	1.46049
AT1G01210	DNA-directed RNA polymerase%2C subunit M%2C archaeal	9.82228	10.849	11.8075	10.8263
AT1G01220	L-FUCOKINASE/GDP-L-FUCOSE PYROPHOSPHORYLASE (FKGP)	5.7157	5.35887	6.41439	5.82965
AT1G01225	NC domain-containing protein-like protein	8.48877	6.55448	4.99408	6.67911
AT1G01230	ORMDL family protein	13.1715	13.9862	12.5097	13.2225
AT1G01240	transmembrane protein	14.6176	19.8838	13.9627	16.1547
AT1G01260	BHLH013; BHLH13; JAM2; JASMONATE ASSOCIATED MYC2 LIKE 2	12.1751	10.9496	11.0729	11.3992
AT1G01290	COFACTOR OF NITRATE REDUCTASE AND XANTHINE DEHYDROGENASE 3 (CNX3)	11.3042	10.8276	11.5666	11.2328
AT1G01300	Eukaryotic aspartyl protease family protein	194.417	118.332	129.496	147.415
AT1G01320	REC1; REDUCED CHLOROPLAST COVERAGE	3.60943	4.21659	4.29463	4.04022
AT1G01340	CYCLIC NUCLEOTIDE GATED CHANNEL 10 (CNGC10)	1.46402	1.28913	2.10214	1.61843
AT1G01350	Zinc finger (CCCH-type/C3HC4-type RING finger) family protein	12.4828	12.6769	14.1717	13.1105
AT1G01360	REGULATORY COMPONENT OF ABA RECEPTOR 1 (RCAR1)	17.6728	39.0731	18.0557	24.9339
AT1G01370	(HTR12)	3.21986	2.26553	1.85653	2.44731
AT1G01430	TRICHOME BIREFRINGENCE-LIKE 25 (TBL25)	2.94277	3.09397	2.67136	2.9027
AT1G01440	hypothetical protein (DUF3133)	6.32055	7.13908	7.58809	7.01591
AT1G01448		3.25465	4.27396	3.63711	3.72191
AT1G01470	LATE EMBRYOGENESIS ABUNDANT 14 (LEA14)	10.9513	6.81037	12.0882	9.94995
AT1G01480	1-AMINO-CYCLOPROPANE-1-CARBOXYLATE SYNTHASE 2 (ACS2)	12.7213	4.3502	12.0144	9.6953
AT1G01490	Heavy metal transport/detoxification superfamily protein	16.9627	17.9497	20.1466	18.353
AT1G01500	Erythronate-4-phosphate dehydrogenase family protein	2.77926	4.27801	5.10097	4.05275
AT1G01510	ANGUSTIFOLIA (AN)	21.9092	22.0428	20.3065	21.4195
AT1G01540	Protein kinase superfamily protein	23.3148	17.8987	22.8354	21.3496
AT1G01550	BYPASS 1 (BPS1)	97.7364	87.8679	107.049	97.551
AT1G01560	MAP KINASE 11 (MPK11)	2.82822	1.66366	2.5676	2.35316
AT1G01600	"CYTOCHROME P450, FAMILY 86, SUBFAMILY A, POLYPEPTIDE 4" (CYP86A4)	4.89155	2.55266	4.57119	4.00514
AT1G01610	GLYCEROL-3-PHOSPHATE ACYLTRANSFERASE 4 (GPAT4)	16.3167	14.8541	20.7542	17.3083
AT1G01620	PLASMA MEMBRANE INTRINSIC PROTEIN 1C (PIP1C)	48.8852	71.2334	37.6477	52.5888
AT1G01630	Sec14p-like phosphatidylinositol transfer family protein	38.1751	25.1487	36.6209	33.3149
AT1G01640	BTB/POZ domain-containing protein	19.0674	21.1319	18.5484	19.5826
AT1G01650	SIGNAL PEPTIDE PEPTIDASE-LIKE 4 (SPPL4)	16.8289	16.9684	16.5574	16.7849
AT1G01680	PLANT U-BOX 54 (PUB54)	16.5159	10.9595	22.4766	16.6506
AT1G01690	PUTATIVE RECOMBINATION INITIATION DEFECTS 3 (PRD3)	5.06457	4.98151	5.39585	5.14731
AT1G01710	acyl-CoA thioesterase II	6.72213	5.97715	6.59952	6.43293
AT1G01720	(ATAF1)	46.4693	75.3364	85.0053	68.937
AT1G01725	adenylosuccinate synthetase	8.88628	12.2297	8.76629	9.96076
AT1G01730	hypothetical protein	51.7569	51.6736	44.7123	49.3809
AT1G01740	kinase with tetratricopeptide repeat domain-containing protein	2.88795	2.93633	2.71181	2.84536
AT1G01750	ACTIN DEPOLYMERIZING FACTOR 11 (ADF11)	1.61533	2.75787	1.38108	1.91809
AT1G01760	denosine deaminases acting on tRNA	2.28779	3.24233	1.9804	2.50351
AT1G01770	propionyl-CoA carboxylase	4.63201	9.45658	7.89095	7.32651
AT1G01780	PLIM2B (PLIM2b)	4.86034	10.0314	7.52532	7.47234
AT1G01800	NAD(P)-binding Rossmann-fold superfamily protein	40.2158	40.4696	41.2291	40.6382
AT1G01810	hypothetical protein	1.42812	1.27037	2.29775	1.66541
AT1G01820	PEROXIN 11C (PEX11C)	36.0489	42.1601	46.7873	41.6655
AT1G01830	ARM repeat superfamily protein	5.29231	5.71768	4.35249	5.12082
AT1G01840	AP2-like ethylene-responsive transcription factor SNZ	1.15055	1.10882	0.942719	1.06737
AT1G01860	PALEFACE 1 (PFC1)	2.37912	2.34604	2.02506	2.25007
AT1G01880	5'-3' exonuclease family protein	1.3564	1.34834	0.992487	1.23241
AT1G01900	(SBTI1.1)	10.81	1.48739	2.83974	5.0457
AT1G01910	ATGET3A; GET3A; GUIDED ENTRY OF TAIL-ANCHORED PROTEIN 3A	20.3406	18.6684	22.7433	20.5841
AT1G01920	SET domain-containing protein	12.4336	12.2405	11.1079	11.9273
AT1G01930	zinc finger protein-like protein	4.69518	5.19284	4.90094	4.92966
AT1G01940	Cyclophilin-like peptidyl-prolyl cis-trans isomerase family protein	9.32709	8.95458	8.26053	8.8474
AT1G01950	ARMADILLO REPEAT KINESIN 2 (ARK2)	5.68586	5.76072	5.04657	5.49772
AT1G01960	EMBRYO SAC DEVELOPMENT ARREST 10 (EDA10)	25.3781	26.0459	24.7509	25.3916
AT1G01970	Tetratricopeptide repeat (TPR)-like superfamily protein	4.60534	4.43103	4.17664	4.40434
AT1G01990	hypothetical protein	23.8584	25.2132	26.8259	25.2991
AT1G02000	UDP-D-GLUCURONATE 4-EPIMERASE 2 (GAE2)	5.2823	4.8058	4.94641	5.01151
AT1G02010	SECRETORY 1A (SEC1A)	1.57246	1.55136	1.17735	1.43372
AT1G02020	nitroreductase family protein	3.10082	3.52832	1.87929	2.83614
AT1G02050	LESS ADHESIVE POLLEN 6 (LAP6)	8.91151	10.0665	8.69809	9.22538
AT1G02060	Tetratricopeptide repeat (TPR)-like superfamily protein	7.17954	8.68095	6.54771	7.4694
AT1G02080	transcription regulator	25.493	23.4821	27.929	25.6347
AT1G02090	FUSCA 5 (FUS5)	14.3599	13.7009	16.3415	14.8008
AT1G02100	SUPPRESSOR OF BRI1 (SBI1)	14.7922	15.8813	16.4294	15.7009
AT1G02110	bZIP domain class transcription factor (DUF630 and DUF632)	22.6867	24.5452	21.9722	23.068
AT1G02120	VASCULAR ASSOCIATED DEATH1 (VAD1)	24.7018	25.1265	25.9528	25.2604
AT1G02130	RAS 5 (RA-5)	17.1938	16.8154	17.7662	17.2585
AT1G02140	MAGO NASHI (MAGO)	73.6762	74.6356	85.9962	78.1027
AT1G02145	HOMOLOG OF ASPARAGINE-LINKED GLYCOSYLATION 12 (ALG12)	5.17991	5.79578	4.96624	5.31397
AT1G02150	Tetratricopeptide repeat (TPR)-like superfamily protein	13.2738	17.8698	14.3875	15.177
AT1G02160	Cox19 family protein (CHCH motif)	20.5939	21.0104	21.6401	21.0814
AT1G02170	METACASPASE 1 (MC1)	11.8649	10.633	13.6524	12.0501
AT1G02180	ferredoxin-like protein	2.93759	2.50873	1.92314	2.45648
AT1G02220	NAC DOMAIN CONTAINING PROTEIN 3 (NAC003)	29.1042	22.1077	62.7676	37.9932
AT1G02230	NAC DOMAIN CONTAINING PROTEIN 4 (NAC004)	3.571	2.80743	5.54656	3.975
AT1G02260	Divalent ion symporter	2.17871	2.40182	2.1087	2.22974
AT1G02270	Calcium-binding endonuclease/exonuclease/phosphatase family	3.54204	3.78296	3.49454	3.60651
AT1G02280	TRANSLOCON AT THE OUTER ENVELOPE MEMBRANE OF CHLOROPLASTS 33 (TOC33)	7.44663	10.3238	8.16531	8.64525
AT1G02290	hypothetical protein	10.0034	10.7117	8.41156	9.70887
AT1G02305	ATCATHB2	25.3338	32.0419	28.8805	28.752
AT1G02330	integrator complex subunit-like protein	16.808	17.3713	20.1273	18.1022
AT1G02335	GERMIN-LIKE PROTEIN SUBFAMILY 2 MEMBER 2 PRECURSOR (GL22)	0.403175	2.5821	1.25786	1.41438
AT1G02360	Chitinase family protein	17.5699	8.64704	23.5446	16.5872
AT1G02370	Tetratricopeptide repeat (TPR)-like superfamily protein	11.0505	9.87418	10.3584	10.4277
AT1G02380	transmembrane protein	3.4497	3.74091	4.42596	3.87219
AT1G02400	GIBBERELLIN 2-OXIDASE 6 (GA2OX6)	4.05096	2.93342	4.19306	3.72581
AT1G02410	cytochrome c oxidase assembly protein CtaG / Cox11 family	11.0477	9.63184	10.4509	10.3768
AT1G02420	Pentatricopeptide repeat (PPR) superfamily protein	4.15929	4.01386	3.90995	4.0277
AT1G02430	ADP-RIBOSYLATION FACTOR D1B (ARFD1B)	1.71982	1.56052	1.8923	1.72421
AT1G02450	NIM1-INTERACTING 1 (NIMIN1)	15.5801	9.21352	7.72729	10.8403
AT1G02475	Polyketide cyclase/dehydrase and lipid transport superfamily protein	3.82407	3.78375	3.34218	3.65
AT1G02500	S-ADENOSYLMETHIONINE SYNTHETASE 1 (SAM1)	493.692	342.525	439.777	425.331
AT1G02520	ATP-BINDING CASSETTE B11 (ABCB11)	14.9314	14.4315	26.024	18.4623
AT1G02530	ATP-BINDING CASSETTE B12 (ABCB12)	1.62422	1.39994	1.7206	1.58159
AT1G02560	NUCLEAR ENCODED CLP PROTEASE 5 (CLPP5)	18.2957	17.2164	16.6312	17.3811
AT1G02660	alpha/beta-Hydrolases superfamily protein	2.27478	2.47003	1.8998	2.21487
AT1G02680	TBP-ASSOCIATED FACTOR 13 (TAF13)	6.26882	7.37414	7.0636	6.90219
AT1G02690	IMPORTIN ALPHA ISOFORM 6 (IMPA-6)	17.1359	15.7282	17.8297	16.8979
AT1G02720	GALACTURONOSYLTRANSFERASE 5 (GATL5)	2.49124	2.22689	2.22448	2.31421
AT1G02730	CELLULOSE SYNTHASE-LIKE D5 (CSLD5)	19.4151	12.1846	11.4817	14.3605
AT1G02740	MORF RELATED GENE 2; MRG2	8.59657	8.3668	8.10103	8.3548
AT1G02750	Drought-responsive family protein	7.22445	6.978	11.695	8.6325
AT1G02770	hypothetical protein	3.39862	2.69814	3.67312	3.25663
AT1G02780	EMBRYO DEFECTIVE 2386 (emb2386)	445.708	461.345	478.707	461.92
AT1G02810	Plant invertase/pectin methylesterase inhibitor superfamily	6.85103	6.34954	6.08278	6.42778
AT1G02816	pectinesterase (Protein of unknown function%2C DUF538)	17.3651	16.4433	18.5331	17.4472
AT1G02840	SERINE/ARGININE-RICH PROTEIN SPLICING FACTOR 34 (SR34)	59.5735	71.8827	74.2648	68.5736
AT1G02850	BETA GLUCOSIDASE 11 (BGLU11)	122.445	115.968	125.368	121.26
AT1G02860	NITROGEN LIMITATION ADAPTATION (NLA)	10.3202	11.8623	16.2928	12.8251
AT1G02870	nucleolar-like protein	21.3863	24.1249	23.7634	23.0915
AT1G02880	THIAMIN PYROPHOSPHOKINASE1 (TPK1)	6.0833	6.27366	7.66614	6.67437
AT1G02890	AAA-type ATPase family protein	27.1035	27.2376	34.0444	29.4618
AT1G02900	RAPID ALKALINIZATION FACTOR 1 (RALF1)	4.52775	4.15684	4.89561	4.52673
AT1G02910	LOW PSII ACCUMULATION1 (LPA1)	5.52859	5.91918	5.62935	5.69237
AT1G02920	GLUTATHIONE S-TRANSFERASE 7 (GSTF7)	154.642	120.344	289.665	188.217
AT1G02930	GLUTATHIONE S-TRANSFERASE 6 (GSTF6)	131.319	88.1924	170.394	129.968
AT1G02960	kinetochore protein	9.3478	9.94406	9.18557	9.49248
AT1G02970	WEE1 KINASE HOMOLOG (WEE1)	2.22993	1.70082	1.85809	1.92961
AT1G02990	hypothetical protein	7.85608	7.86408	7.56452	7.76156
AT1G03000	PEROXIN 6 (PEX6)	7.46667	7.72594	5.45721	6.88328
AT1G03010	Phototropic-responsive NPH3 family protein	5.04111	8.49681	3.32968	5.62253
AT1G03030	P-loop containing nucleoside triphosphate hydrolases superfamily protein	6.1378	6.33021	6.0571	6.17503
AT1G03040	basic helix-loop-helix (bHLH) DNA-binding superfamily protein	27.2439	29.8413	29.8557	28.9803
AT1G03060	SPIRRIG (SPI)	9.84785	8.14447	8.14343	8.71192
AT1G03080	NETWORKED 1D (NET1D)	34.9245	34.267	40.7154	36.6356
AT1G03090	(MCCA)	6.37397	14.6776	8.22308	9.75823
AT1G03100	Pentatricopeptide repeat (PPR) superfamily protein	2.45526	2.59036	2.46753	2.50438
AT1G03110	TRNA MODIFICATION 82 (TRM82)	7.74059	6.21427	6.30982	6.75489
AT1G03130	PHOTOSYSTEM I SUBUNIT D-2 (PSAD-2)	1.5811	2.4268	2.58336	2.19708
AT1G03140	splicing factor Prp18 family protein	33.6394	38.5765	40.8905	37.7021
AT1G03150	Acyl-CoA N-acyltransferases (NAT) superfamily protein	4.54984	4.4622	4.86861	4.62688
AT1G03160	FZO-LIKE (FZL)	2.10592	2.21638	1.87325	2.06518
AT1G03180	non-structural protein	2.44508	1.93666	1.9085	2.09675
AT1G03190	ULTRAVIOLET HYPERSENSITIVE 6 (UVH6)	4.69271	4.79673	5.541	5.01015
AT1G03200	hypothetical protein	4.22083	5.55917	8.22856	6.00285
AT1G03210	Phenazine biosynthesis PhzC/PhzF protein	24.2788	23.4054	24.7139	24.1327
AT1G03220	Eukaryotic aspartyl protease family protein	457.75	365.727	878.077	567.185
AT1G03230	Eukaryotic aspartyl protease family protein	77.3051	50.6416	85.969	71.3052
AT1G03250	R3H domain protein	8.5921	8.41221	9.25646	8.75359
AT1G03260	SNARE associated Golgi protein family	2.33717	2.05948	2.50386	2.30017
AT1G03270	CBS domain protein with a domain protein (DUF21)	1.70727	1.6014	1.68367	1.66411
AT1G03280	Transcription factor TFIIE%2C alpha subunit	14.8104	14.5982	15.8153	15.0746
AT1G03290	ELKS/Rab6-interacting/CAST family protein	18.9287	20.8385	24.4094	21.3922
AT1G03300	DOMAIN OF UNKNOWN FUNCTION 724 1 (ATDUF1)	2.33454	2.48914	1.99557	2.27308
AT1G03310	DEBRANCHING ENZYME 1 (DBE1)	5.81917	5.70267	5.25516	5.59233
AT1G03330	LSM2; SM-LIKE 2	12.2474	12.1787	10.7831	11.7364
AT1G03350	BSD domain-containing protein	23.83	21.5001	25.8739	23.7347
AT1G03360	RIBOSOMAL RNA PROCESSING 4 (RRP4)	11.9023	11.1618	12.5243	11.8628
AT1G03365	RING/U-box superfamily protein	8.25044	8.55608	8.29064	8.36572
AT1G03370	C2 calcium/lipid-binding and GRAM domain containing protein	12.5764	10.5751	11.7445	11.632
AT1G03380	HOMOLOG OF YEAST AUTOPHAGY 18 (ATG18) G (ATG18G)	11.1312	15.1668	13.9496	13.4159
AT1G03400	2-oxoglutarate (2OG) and Fe(II)-dependent oxygenase superfamily protein	16.3624	11.6082	12.8371	13.6026
AT1G03410	(2A6)	5.8134	5.30547	5.2237	5.44752
AT1G03430	HISTIDINE-CONTAINING PHOSPHOTRANSFER FACTOR 5 (AHP5)	5.86027	6.50839	4.78497	5.71788
AT1G03440	Leucine-rich repeat (LRR) family protein	2.18973	2.58858	1.76156	2.17996
AT1G03457	RNA-binding (RRM/RBD/RNP motifs) family protein	3.18622	2.64094	4.00153	3.27623
AT1G03470	NETWORKED 3A (NET3A)	5.50033	5.78584	4.32738	5.20452
AT1G03475	LESION INITIATION 2 (LIN2)	15.4328	16.7655	17.4955	16.5646
AT1G03495	HXXXD-type acyl-transferase family protein	2.31079	2.52802	3.15432	2.66438
AT1G03510	Tetratricopeptide repeat (TPR)-like superfamily protein	1.89074	1.7995	1.59662	1.76229
AT1G03520	Core-2/I-branching beta-1%2C6-N-acetylglucosaminyltransferase family protein	4.56521	4.85462	3.91515	4.44499
AT1G03530	NUCLEAR ASSEMBLY FACTOR 1 (NAF1)	15.0166	13.9464	14.8437	14.6023
AT1G03540	Pentatricopeptide repeat (PPR-like) superfamily protein	1.84962	1.751	2.16183	1.92082
AT1G03550	SECRETORY CARRIER MEMBRANE PROTEIN 4 (SCAMP4)	2.9502	4.00885	3.8094	3.58948
AT1G03560	Pentatricopeptide repeat (PPR-like) superfamily protein	6.26163	5.42502	4.88335	5.52333
AT1G03590	Protein phosphatase 2C family protein	24.0422	16.4617	20.024	20.176
AT1G03610	plant/protein (DUF789)	21.9218	30.1109	24.5153	25.516
AT1G03620	ELMO/CED-12 family protein	3.33088	3.68235	1.64843	2.88722
AT1G03650	Acyl-CoA N-acyltransferases (NAT) superfamily protein	3.31561	3.05261	3.16946	3.17923
AT1G03680	THIOREDOXIN M-TYPE 1 (THM1)	9.37473	9.28096	8.60872	9.08814
AT1G03687	DTW domain-containing protein	6.51971	6.4857	6.78519	6.59687
AT1G03710	Cystatin/monellin superfamily protein	21.9869	18.5982	19.405	19.9967
AT1G03730	pyrroline-5-carboxylate reductase	7.8611	6.22731	6.41562	6.83468
AT1G03740	Protein kinase superfamily protein	12.5005	12.1851	15.023	13.2362
AT1G03750	SWITCH 2 (SWI2)	3.45863	3.7986	4.09988	3.7857
AT1G03760	Prefoldin chaperone subunit family protein	10.1946	12.6673	13.4013	12.0877
AT1G03770	RING 1B (RING1B)	7.12234	7.96681	10.4203	8.50317
AT1G03780	TARGETING PROTEIN FOR XKLP2 (TPX2)	6.17779	4.67773	3.79164	4.88239
AT1G03820	E6-like protein	6.98416	10.5983	2.41865	6.66704
AT1G03830	guanylate-binding family protein	6.16172	5.77527	6.17538	6.03746
AT1G03850	GLUTAREDOXIN 13 (GRXS13)	6.82622	5.363	7.70384	6.63102
AT1G03860	PROHIBITIN 2 (PHB2)	30.7516	30.4827	36.6875	32.6406
AT1G03870	FASCICLIN-LIKE ARABINOOGALACTAN 9 (FLA9)	5.65899	3.9078	7.68413	5.75031
AT1G03900	ATP-BINDING CASSETTE I18 (ABCI18)	63.7459	69.5171	78.2743	70.5124
AT1G03905	ATP-BINDING CASSETTE I19 (ABCI19)	2.76885	1.6421	2.41119	2.27405
AT1G03910	CACTIN; CTN	20.0964	20.5633	23.1285	21.2627
AT1G03930	DUAL SPECIFICITY KINASE 1 (ADK1)	5.67968	5.06082	4.82921	5.1899
AT1G03940	HXXXD-type acyl-transferase family protein	1.60994	1.92706	2.09982	1.87894
AT1G03950	VACUOLAR PROTEIN SORTING-ASSOCIATED PROTEIN 2.3 (VPS2.3)	2.11751	2.09013	2.56533	2.25766
AT1G03960	Calcium-binding EF hand family protein	3.43654	3.79435	3.40117	3.54402
AT1G03970	G-BOX BINDING FACTOR 4 (GBF4)	12.8199	15.6929	18.9537	15.8222
AT1G03980	PHYTOCHELATIN SYNTHASE 2 (PCS2)	1.52842	0.953724	0.7779	1.08668
AT1G04000	hypothetical protein	6.65979	4.81738	6.11373	5.86363
AT1G04010	PHOSPHOLIPID STEROL ACYL TRANSFERASE 1 (PSAT1)	2.11108	2.22753	1.85386	2.06416
AT1G04020	BREAST CANCER ASSOCIATED RING 1 (BARD1)	3.62167	2.56408	2.11224	2.766
AT1G04030	eisosome protein	5.22886	4.0852	2.74608	4.02005
AT1G04040	HAD superfamily%2C subfamily IIIB acid phosphatase	61.9752	50.3142	68.2328	60.1741
AT1G04050	HOMOLOG OF SU(VAR)3-9 1 (SUVR1)	2.97763	3.31788	3.24076	3.17875
AT1G04070	TRANSLOCASE OF OUTER MEMBRANE 22-I (TOM22-I)	20.2823	16.4878	20.5533	19.1078
AT1G04080	(PRP39)	37.0798	36.5693	42.0864	38.5785
AT1G04100	INDOLEACETIC ACID-INDUCED PROTEIN 10 (IAA10)	6.94787	5.79457	8.09169	6.94471
AT1G04120	ATP-BINDING CASSETTE C5 (ABCC5)	30.554	29.5082	30.8669	30.3097
AT1G04130	TETRATRICOPEPTIDE REPEAT 2 (TPR2)	5.94903	5.83089	5.09337	5.62443
AT1G04140	Transducin family protein / WD-40 repeat family protein	25.2144	28.5669	29.4345	27.7386
AT1G04170	EUKARYOTIC TRANSLATION INITIATION FACTOR 2 GAMMA SUBUNIT (EIF2 GAMMA)	36.05	35.9244	39.8044	37.2596
AT1G04190	TETRATRICOPEPTIDE REPEAT 3 (TPR3)	16.1136	16.1586	18.6545	16.9756
AT1G04200	dyggve-melchior-clausen syndrome protein	11.3233	8.31214	9.78629	9.80725
AT1G04210	Leucine-rich repeat protein kinase family protein	17.3666	16.4731	18.5119	17.4505
AT1G04220	3-KETOACYL-COA SYNTHASE 2 (KCS2)	39.5854	18.8191	22.3539	26.9195
AT1G04230	rRNA-processing EFG1-like protein (DUF2361)	7.14761	6.76886	8.86932	7.59526
AT1G04240	SHORT HYPOCOTYL 2 (SHY2)	12.6874	6.28546	7.1912	8.72137
AT1G04250	AUXIN RESISTANT 3 (AXR3)	50.6922	34.6365	40.2657	41.8648
AT1G04260	CAMV MOVEMENT PROTEIN INTERACTING PROTEIN 7 (MPI7)	21.1462	19.2379	18.5187	19.6343
AT1G04270	CYTOSOLIC RIBOSOMAL PROTEIN S15 (RPS15)	319.223	321.337	355.013	331.857
AT1G04280	P-loop containing nucleoside triphosphate hydrolases superfamily protein	14.1851	12.0294	16.4648	14.2264
AT1G04290	Thioesterase superfamily protein	1.39499	1.40865	1.12956	1.31107
AT1G04300	MUSE13; TRAF1B; TUMOR NECROSIS FACTOR RECEPTOR-ASSOCIATED FACTOR 1B	20.0185	25.7248	29.3414	25.0283
AT1G04310	ETHYLENE RESPONSE SENSOR 2 (ERS2)	7.54754	11.6618	5.78987	8.33306
AT1G04340	HR-like lesion-inducing protein-like protein	12.5458	11.7259	11.7707	12.0141
AT1G04390	BTB/POZ domain-containing protein	3.75255	4.17208	3.75256	3.89239
AT1G04400	CRYPTOCHROME 2 (CRY2)	44.667	44.4278	40.3453	43.1467
AT1G04410	CYTOSOLIC-NAD-DEPENDENT MALATE DEHYDROGENASE 1 (c-NAD-MDH1)	182.507	194.471	202.021	193
AT1G04420	NAD(P)-linked oxidoreductase superfamily protein	1.76342	1.94515	1.18217	1.63025
AT1G04425		2.44924	1.81246	1.64468	1.96879
AT1G04430	S-adenosyl-L-methionine-dependent methyltransferases superfamily protein	28.7712	21.6086	22.964	24.4479
AT1G04440	CASEIN KINASE LIKE 13 (CKL13)	24.7551	25.682	30.6434	27.0268
AT1G04480	Ribosomal protein L14p/L23e family protein	98.4052	93.8609	106.879	99.715
AT1G04510	MOS4-ASSOCIATED COMPLEX 3A (MAC3A)	17.3842	18.6013	21.7015	19.229
AT1G04520	PLASMODESMATA-LOCATED PROTEIN 2 (PDLP2)	2.65611	2.25079	1.88558	2.26416
AT1G04530	TETRATRICOPEPTIDE REPEAT 4 (TPR4)	17.3419	17.528	15.511	16.7936
AT1G04540	Calcium-dependent lipid-binding (CaLB domain) family protein	1.27703	1.41153	0.767824	1.15213
AT1G04550	INDOLE-3-ACETIC ACID INDUCIBLE 12 (IAA12)	14.3983	14.4127	13.5756	14.1288
AT1G04555	transmembrane protein	6.99292	6.10349	6.80556	6.63399
AT1G04580	ALDEHYDE OXIDASE 4 (AO4)	6.79822	6.70451	6.71678	6.73984
AT1G04590	PPR containing-like protein	9.22178	8.74976	8.63641	8.86931
AT1G04620	7-HYDROXYMETHYL CHLOROPHYLL A (HMCHL) REDUCTASE (HCAR)	0.962555	1.39673	1.01326	1.12418
AT1G04630	MATERNAL EFFECT EMBRYO ARREST 4 (MEE4)	13.6083	11.8249	13.0429	12.8253
AT1G04635	EMBRYO DEFECTIVE 1687 (EMB1687)	3.79529	3.48728	5.35229	4.21162
AT1G04640	LIPOYLTRANSFERASE 2 (LIP2)	2.50571	2.40701	2.15414	2.35562
AT1G04650	holliday junction resolvase	3.98455	3.02848	3.39379	3.46894
AT1G04680	Pectin lyase-like superfamily protein	3.61479	2.49128	1.28272	2.46293
AT1G04690	POTASSIUM CHANNEL BETA SUBUNIT 1 (KAB1)	41.3781	36.167	40.5799	39.375
AT1G04700	PB1 domain-containing protein tyrosine kinase	1.03479	1.27276	1.27617	1.19457
AT1G04710	PEROXISOMAL 3-KETOACYL-COA THIOLASE 4 (PKT4)	1.82117	1.53347	1.62913	1.66126
AT1G04730	CHROMOSOME TRANSMISSION FIDELITY 18 (CTF18)	3.62158	2.60434	2.75375	2.99322
AT1G04750	VESICLE-ASSOCIATED MEMBRANE PROTEIN 721 (VAMP721)	43.7618	41.9791	43.9477	43.2295
AT1G04760	VESICLE-ASSOCIATED MEMBRANE PROTEIN 726 (VAMP726)	1.86045	1.43392	0.746637	1.347
AT1G04770	SD!2; SULFUR DEFICIENCY INDUCED 2	27.2947	27.6645	31.6573	28.8722
AT1G04780	Ankyrin repeat family protein	32.7065	33.6257	38.729	35.0204
AT1G04790	RING/U-box superfamily protein	10.0253	10.8479	10.0112	10.2948
AT1G04810	26S proteasome regulatory complex%2C non-ATPase subcomplex%2C Rpn2/Psmd1 subunit	22.7713	24.3482	29.6337	25.5844
AT1G04820	TUBULIN ALPHA-4 CHAIN (TUA4)	224.335	188.661	206.042	206.346
AT1G04830	Ypt/Rab-GAP domain of gyp1p superfamily protein	5.60457	5.93463	6.61603	6.05174
AT1G04840	Tetratricopeptide repeat (TPR)-like superfamily protein	1.25075	1.01239	1.37182	1.21166
AT1G04850	ubiquitin-associated (UBA)/TS-N domain-containing protein	26.7381	25.3687	30.8487	27.6518
AT1G04860	UBIQUITIN-SPECIFIC PROTEASE 2 (UBP2)	11.6326	11.4058	14.2214	12.4199
AT1G04870	PROTEIN ARGININE METHYLTRANSFERASE 10 (PRMT10)	30.9997	29.6261	33.9875	31.5378
AT1G04900	NADH dehydrogenase ubiquinone complex I%2C assembly factor-like protein (DUF185)	4.04269	3.84572	4.28469	4.0577
AT1G04910	O-fucosyltransferase family protein	9.18899	8.42381	9.10501	8.90594
AT1G04930	hydroxyproline-rich glycoprotein family protein	2.48012	2.25761	2.5832	2.44031
AT1G04945	HIT-type Zinc finger family protein	4.63637	4.18585	4.9649	4.59571
AT1G04950	TATA BOX ASSOCIATED FACTOR II 59 (TAFII59)	6.85927	7.31903	6.8329	7.00373
AT1G04960	golgin family A protein (DUF1664)	6.25723	5.89991	7.34476	6.50063
AT1G04970	LBR-1	12.3598	12.9668	13.913	13.0799
AT1G04980	PDI-LIKE 2-2 (PDIL2-2)	4.87616	3.62728	4.6884	4.39728
AT1G04985	triacylglycerol lipase-like protein	10.3507	11.8723	14.3129	12.1787
AT1G04990	Zinc finger C-x8-C-x5-C-x3-H type family protein	14.933	10.5156	13.3341	12.9276
AT1G05010	ETHYLENE-FORMING ENZYME (EFE)	57.4216	37.3657	66.0771	53.6215
AT1G05030	Major facilitator superfamily protein	2.18452	2.44625	1.9356	2.18879
AT1G05055	GENERAL TRANSCRIPTION FACTOR II H2 (GTF2H2)	6.49925	5.99192	6.3151	6.26876
AT1G05060	coiled-coil protein	23.3713	25.0366	42.1128	30.1736
AT1G05065	CLAVATA3/ESR-RELATED 20 (CLE20)	7.17679	4.57762	6.71658	6.157
AT1G05070	transmembrane protein%2C putative (DUF1068)	12.6464	13.8605	12.1846	12.8971
AT1G05090	dentin sialophosphoprotein-like protein	7.78552	7.86487	6.5785	7.40963
AT1G05100	MITOGEN-ACTIVATED PROTEIN KINASE KINASE KINASE 18 (MAPKKK18)	5.98728	6.41538	6.52496	6.30921
AT1G05120	Helicase protein with RING/U-box domain-containing protein	10.3644	11.1268	10.0544	10.5152
AT1G05135		9.73945	7.73478	22.2744	13.2496
AT1G05140	Peptidase M50 family protein	4.09033	5.49273	3.31091	4.29799
AT1G05150	Calcium-binding tetratricopeptide family protein	17.2917	16.2935	14.1211	15.9021
AT1G05160	"CYTOCHROME P450, FAMILY 88, SUBFAMILY A, POLYPEPTIDE 3" (CYP88A3)	4.34093	5.01842	4.29557	4.55164
AT1G05180	AUXIN RESISTANT 1 (AXR1)	12.2463	11.8046	12.5564	12.2024
AT1G05190	EMBRYO DEFECTIVE 2394 (emb2394)	7.38671	10.6308	6.29466	8.10407
AT1G05205	hexokinase-1 protein	13.5946	11.9102	13.7853	13.0967
AT1G05210	Transmembrane protein 97%2C Putative	1.95736	0.967975	0.748787	1.22471
AT1G05220	Transmembrane protein 97%2C Putative	1.31232	1.44074	1.06276	1.27194
AT1G05270	TraB family protein	10.5903	11.4394	14.0097	12.0131
AT1G05320	myosin heavy chain%2C embryonic smooth protein	4.0125	4.15419	5.7954	4.65403
AT1G05340	cysteine-rich TM module stress tolerance protein	1.44008	3.90969	3.05888	2.80288
AT1G05350	NAD(P)-binding Rossmann-fold superfamily protein	8.585	7.74065	8.46828	8.26464
AT1G05360	KILLING ME SLOWLY 2 (KMS2)	5.24147	5.1742	3.46274	4.62614
AT1G05380	Acyl-CoA N-acyltransferase with RING/FYVE/PHD-type zinc finger protein	15.4845	16.0316	18.4142	16.6434
AT1G05385	LOW PSII ACCUMULATION 19 (LPA19)	2.88147	4.10394	2.35448	3.1133
AT1G05400	hypothetical protein	2.15244	2.44924	3.12917	2.57695
AT1G05410	CDPK adapter%2C putative (DUF1423)	10.5631	11.2548	10.7552	10.8577
AT1G05430	hypothetical protein	10.1229	8.74533	8.96946	9.27925
AT1G05440	C-8 sterol isomerase	1.6304	0.935515	0.763889	1.10993
AT1G05460	SILENCING DEFECTIVE (SDE3)	7.31255	7.697	7.51054	7.5067
AT1G05470	COTYLEDON VASCULAR PATTERN 2 (CVP2)	2.52681	3.86259	1.71228	2.70056
AT1G05490	CHROMATIN REMODELING 31 (chr31)	1.95645	1.82312	1.68571	1.82176
AT1G05500	(NTMC2T2.1)	8.26502	7.73442	7.26871	7.75605
AT1G05520	Sec23/Sec24 protein transport family protein	11.889	11.128	13.3916	12.1362
AT1G05570	CALLOSE SYNTHASE 1 (CALS1)	8.88586	13.2582	8.04785	10.064
AT1G05575	transmembrane protein	3.37186	6.76255	5.53921	5.22454
AT1G05577	UPSTREAM OF FLC protein (DUF966)	6.3703	7.47519	4.02021	5.95523
AT1G05590	BETA-HEXOSAMINIDASE 2 (HEXO2)	6.68416	6.09785	3.84125	5.54109
AT1G05600	EMBRYO DEFECTIVE 3101 (EMB3101)	3.28217	3.20266	2.60081	3.02855
AT1G05620	URIDINE-RIBOHYDROLASE 2 (URH2)	17.1706	11.9153	20.1689	16.4183
AT1G05630	INOSITOL-POLYPHOSPHATE 5-PHOSPHATASE 13 (5PTASE13)	2.38065	2.29738	2.0247	2.23424
AT1G05640	Ankyrin repeat family protein	3.86295	4.65295	2.5466	3.6875
AT1G05670	Pentatricopeptide repeat (PPR-like) superfamily protein	2.97203	3.03962	2.94117	2.98427
AT1G05675	UDP-Glycosyltransferase superfamily protein	1.16775	0.889002	2.70819	1.58831
AT1G05680	URIDINE DIPHOSPHATE GLYCOSYLTRANSFERASE 74E2 (UGT74E2)	0.943682	1.47755	4.28243	2.23455
AT1G05710	basic helix-loop-helix (bHLH) DNA-binding superfamily protein	8.51358	6.75659	3.6193	6.29649
AT1G05720	selenoprotein family protein	12.8042	10.9318	11.3601	11.6987
AT1G05730	FAM136A-like protein (DUF842)	3.51956	2.97206	4.18577	3.55913
AT1G05750	PIGMENT DEFECTIVE 247 (PDE247)	2.2939	2.55605	2.45266	2.4342
AT1G05780	Vacuolar ATPase assembly integral membrane protein VMA21-like domain-containing protein	3.56405	3.47121	2.96185	3.33237
AT1G05785	Got1/Sft2-like vescicle transport protein family	3.2375	3.18008	3.37017	3.26258
AT1G05790	lipase class 3 family protein	4.33934	4.79752	4.01758	4.38481
AT1G05805	basic helix-loop-helix (bHLH) DNA-binding superfamily protein	10.8324	10.3703	10.1439	10.4488
AT1G05810	RAB GTPASE HOMOLOG A5E (RABA5E)	25.6478	18.5251	21.0681	21.747
AT1G05820	SIGNAL PEPTIDE PEPTIDASE-LIKE 5 (SPPL5)	1.22834	0.971685	0.993833	1.06462
AT1G05830	TRITHORAX-LIKE PROTEIN 2 (ATX2)	8.03541	8.08157	6.84417	7.65372
AT1G05840	Eukaryotic aspartyl protease family protein	10.8448	13.6474	13.5069	12.6664
AT1G05850	POM-POM1 (POM1)	76.8402	54.6345	58.6575	63.3774
AT1G05860	INO80 complex subunit D-like protein	5.72281	6.26028	6.03432	6.00581
AT1G05870	hypothetical protein (DUF1685)	23.3026	20.0959	19.4661	20.9549
AT1G05890	ARIADNE 5 (ARI5)	18.8246	22.7759	23.6014	21.734
AT1G05900	ENDONUCLEASE III 2 (NTH2)	1.56453	1.53975	1.46022	1.5215
AT1G05910	cell division cycle protein 48-related / CDC48-like protein	10.693	10.0493	12.0469	10.9297
AT1G05940	CATIONIC AMINO ACID TRANSPORTER 9 (CAT9)	11.0909	10.5033	10.4888	10.6943
AT1G05950	hypothetical protein	3.71177	3.14416	2.41709	3.09101
AT1G05960	ARM repeat superfamily protein	8.81364	8.27114	7.95096	8.34525
AT1G05970	RNA-binding (RRM/RBD/RNP motifs) family protein	5.97698	7.37028	5.56764	6.30497
AT1G06000	UGT89C1	2.53013	1.30121	1.54197	1.7911
AT1G06010	basic leucine zipper/W2 domain protein	7.08175	7.52321	6.07342	6.89279
AT1G06040	SALT TOLERANCE (STO)	32.9936	81.0935	40.647	51.578
AT1G06050	ENHANCED DISEASE RESISTANCE-like protein (DUF1336)	2.4748	2.54755	2.56082	2.52772
AT1G06060	LisH and RanBPM domains containing protein	8.04104	8.48996	8.24627	8.25909
AT1G06070	Basic-leucine zipper (bZIP) transcription factor family protein	13.4915	14.4687	14.8316	14.2639
AT1G06080	DELTA 9 DESATURASE 1 (ADS1)	147.443	98.024	90.5099	111.992
AT1G06090	Fatty acid desaturase family protein	1.87819	2.12325	2.19577	2.06574
AT1G06110	SKP1/ASK-INTERACTING PROTEIN 16 (SKIP16)	21.659	24.1996	19.5893	21.816
AT1G06130	GLYOXALASE 2-4 (GLX2-4)	8.87269	9.47029	9.52201	9.28833
AT1G06140	MITOCHONDRIAL EDITING FACTOR 3 (MEF3)	1.1576	1.06153	0.972809	1.06398
AT1G06180	MYB DOMAIN PROTEIN 13 (MYB13)	2.67219	5.09147	3.30752	3.69039
AT1G06190	RHO-N 1 (RHON1)	10.3834	10.6811	11.9137	10.9927
AT1G06200	Peptidase S24/S26A/S26B/S26C family protein	16.4135	18.3222	19.6082	18.1146
AT1G06210	ENTH/VHS/GAT family protein	17.3035	16.0092	16.5499	16.6209
AT1G06220	MATERNAL EFFECT EMBRYO ARREST 5 (MEE5)	26.1995	25.2112	27.9888	26.4665
AT1G06230	GLOBAL TRANSCRIPTION FACTOR GROUP E4 (GTE4)	30.2935	34.2703	34.2962	32.9533
AT1G06240	diiron containing four-helix bundle family ferritin protein%2C putative (Protein of unknown function DUF455)	3.98882	4.00456	5.73417	4.57585
AT1G06250	alpha/beta-Hydrolases superfamily protein	2.39778	2.60515	3.46921	2.82405
AT1G06265		1.92223	2.13701	2.2725	2.11058
AT1G06270	Pentatricopeptide repeat (PPR) superfamily protein	6.9721	7.62723	5.87519	6.82484
AT1G06290	ACYL-COA OXIDASE 3 (ACX3)	15.0627	15.5253	18.2167	16.2682
AT1G06350	ADS4; ATADS4; DELTA 9 DESATURASE 4	13.9735	3.23627	8.70721	8.63901
AT1G06370		2.19696	3.12468	1.64739	2.32301
AT1G06380	Ribosomal protein L1p/L10e family	10.3767	9.71349	9.03005	9.70673
AT1G06390	GSK3/SHAGGY-LIKE PROTEIN KINASE 1 (GSK1)	18.8037	20.8026	20.4628	20.023
AT1G06400	(ARA-2)	25.5377	29.4363	31.4078	28.7939
AT1G06410	TREHALOSE-PHOSPHATASE/SYNTHASE 7 (TPS7)	37.2613	35.7841	37.5385	36.8613
AT1G06420	DNA ligase-like protein	2.76807	3.34848	1.73088	2.61581
AT1G06430	FTSH PROTEASE 8 (ftsh8)	6.06621	8.16209	7.46253	7.23028
AT1G06440	Ubiquitin carboxyl-terminal hydrolase family protein	2.4412	1.92498	2.04901	2.1384
AT1G06450	Polynucleotidyl transferase%2C ribonuclease H-like superfamily protein	4.35245	5.04643	4.77303	4.72397
AT1G06460	ALPHA-CRYSTALLIN DOMAIN 32.1 (ACD32.1)	1.38771	2.46852	1.52429	1.79351
AT1G06470	Nucleotide/sugar transporter family protein	6.06341	5.47939	5.56894	5.70391
AT1G06475	transmembrane protein	5.43072	3.78571	2.87634	4.03092
AT1G06500	hypothetical protein	7.34192	7.55298	6.18942	7.02811
AT1G06510	forkhead-associated domain protein	4.37911	4.46699	4.17857	4.34156
AT1G06515	SMALL SUBUNIT OF SPT A; SSSPTA	8.49896	8.61631	7.14697	8.08741
AT1G06530	PEROXISOMAL AND MITOCHONDRIAL DIVISION FACTOR 2 (PMD2)	40.8933	44.6271	48.5517	44.6907
AT1G06540	hypothetical protein	3.94747	2.31389	2.95829	3.07322
AT1G06550	ATP-dependent caseinolytic (Clp) protease/crotonase family protein	48.3567	35.1521	49.9742	44.4944
AT1G06560	NOP2C	5.54585	5.38595	7.66112	6.19764
AT1G06570	PHYTOENE DESATURATION 1 (PDS1)	33.2044	53.8278	58.3906	48.4743
AT1G06580	PENTATRICOPEPTIDE REPEAT 1; PPR1	2.06998	2.22089	1.48074	1.92387
AT1G06590	anaphase-promoting complex subunit	4.1128	4.22898	3.78073	4.04084
AT1G06620	2-oxoglutarate (2OG) and Fe(II)-dependent oxygenase superfamily protein	35.0115	24.5369	29.167	29.5718
AT1G06630	F-box/RNI-like superfamily protein	11.4327	12.6066	11.7774	11.9389
AT1G06640	2-oxoglutarate (2OG) and Fe(II)-dependent oxygenase superfamily protein	25.3966	27.7035	23.0856	25.3953
AT1G06650	2-oxoglutarate (2OG) and Fe(II)-dependent oxygenase superfamily protein	9.36027	13.0112	10.6367	11.0027
AT1G06660	JASON (JASON)	4.19891	2.96859	3.57702	3.58151
AT1G06670	NUCLEAR DEIH-BOXHELICASE (NIH)	20.4075	20.4716	22.48	21.1197
AT1G06680	PHOTOSYSTEM II SUBUNIT P-1 (PSBP-1)	0.572504	2.21574	1.25374	1.34733
AT1G06700	Protein kinase superfamily protein	23.7039	27.4153	27.7306	26.2833
AT1G06710	Tetratricopeptide repeat (TPR)-like superfamily protein	3.39715	3.21481	3.1634	3.25845
AT1G06720	P-loop containing nucleoside triphosphate hydrolases superfamily protein	15.5721	16.0299	18.1754	16.5925
AT1G06730	pfkB-like carbohydrate kinase family protein	6.01027	5.67121	5.85638	5.84595
AT1G06760	H1.1; HISTONE 1.1	178.571	159.91	180.785	173.089
AT1G06770	DREB2A-INTERACTING PROTEIN 1 (DRIP1)	3.67559	3.94943	4.12024	3.91509
AT1G06780	GALACTURONOSYLTRANSFERASE 6 (GAUT6)	4.26855	3.7607	5.10747	4.37891
AT1G06790	RNA polymerase Rpb7 N-terminal domain-containing protein	4.09772	4.3031	4.11841	4.17308
AT1G06800	PHOSPHOLIPASE A I GAMMA 1 (PLA-I\{gamma\}1)	19.1578	12.786	17.6705	16.5381
AT1G06820	CAROTENOID ISOMERASE (CRTISO)	5.1084	4.58396	4.55993	4.75076
AT1G06840	Leucine-rich repeat protein kinase family protein	21.7901	20.5735	23.7824	22.0487
AT1G06850	BASIC LEUCINE-ZIPPER 52 (bZIP52)	4.10418	4.50171	5.25988	4.62192
AT1G06870	PLASTIDIC TYPE I SIGNAL PEPTIDASE 2A (PLSP2A)	7.43669	6.76381	8.41596	7.53882
AT1G06890	UDP-XYLOSE TRANSPORTER3; UXT3	24.937	23.0528	24.573	24.1876
AT1G06900	Insulinase (Peptidase family M16) family protein	17.3336	17.4598	19.7407	18.178
AT1G06910	TRF-LIKE 7 (TRFL7)	3.50133	3.20149	3.20158	3.30147
AT1G06950	TRANSLOCON AT THE INNER ENVELOPE MEMBRANE OF CHLOROPLASTS 110 (TIC110)	16.6433	17.5492	18.7867	17.6597
AT1G06960	RNA-binding (RRM/RBD/RNP motifs) family protein	8.59586	7.93043	6.46882	7.66504
AT1G06980	6%2C7-dimethyl-8-ribityllumazine synthase	32.0098	22.0734	27.4564	27.1798
AT1G07000	EXOCYST SUBUNIT EXO70 FAMILY PROTEIN B2 (EXO70B2)	10.3974	7.64844	15.4666	11.1708
AT1G07020	hypothetical protein	19.0727	19.3763	21.6222	20.0237
AT1G07030	Mitochondrial substrate carrier family protein	12.1283	12.2453	13.3618	12.5784
AT1G07040	plant/protein	11.7286	17.7793	17.7263	15.7447
AT1G07070	Ribosomal protein L35Ae family protein	8.5151	9.05572	9.65794	9.07625
AT1G07080	Thioredoxin superfamily protein	22.3354	22.3822	19.3052	21.3409
AT1G07090	LIGHT SENSITIVE HYPOCOTYLS 6 (LSH6)	8.70959	10.5716	11.2667	10.1826
AT1G07110	"FRUCTOSE-2,6-BISPHOSPHATASE" (F2KP)	4.25441	5.83559	4.6891	4.92637
AT1G07135	glycine-rich protein	6.80009	11.0118	7.13181	8.31458
AT1G07140	(SIRANBP)	67.4424	59.7509	81.0186	69.404
AT1G07150	MITOGEN-ACTIVATED PROTEIN KINASE KINASE KINASE 13 (MAPKKK13)	1.76817	4.12374	3.06217	2.98469
AT1G07170	PHF5-like protein	17.8551	20.0851	19.9822	19.3075
AT1G07200	Double Clp-N motif-containing P-loop nucleoside triphosphate hydrolases superfamily protein	7.55492	10.2719	7.90023	8.57567
AT1G07210	Ribosomal protein S18	32.9299	30.6111	35.3393	32.9601
AT1G07220	O-glucosyltransferase rumi-like protein (DUF821)	10.7166	9.53341	10.2282	10.1594
AT1G07230	NON-SPECIFIC PHOSPHOLIPASE C1 (NPC1)	25.4657	23.3915	19.1824	22.6799
AT1G07240	UDP-GLUCOSYL TRANSFERASE 71C5 (UGT71C5)	16.2909	16.6824	20.7513	17.9082
AT1G07250	UDP-GLUCOSYL TRANSFERASE 71C4 (UGT71C4)	8.91819	11.6102	8.96683	9.83173
AT1G07260	UDP-GLUCOSYL TRANSFERASE 71C3 (UGT71C3)	11.0166	11.4443	9.65277	10.7046
AT1G07280	Tetratricopeptide repeat (TPR)-like superfamily protein	4.51503	3.02933	3.8297	3.79135
AT1G07300	josephin protein-like protein	6.29827	6.93666	7.93504	7.05666
AT1G07310	Calcium-dependent lipid-binding (CaLB domain) family protein	37.7407	35.2165	42.4411	38.4661
AT1G07320	RIBOSOMAL PROTEIN L4 (RPL4)	8.10013	11.7642	6.83156	8.89865
AT1G07350	SERINE/ARGININE RICH-LIKE PROTEIN 45A (SR45a)	25.3563	40.4102	38.3626	34.7097
AT1G07360	MOS4-ASSOCIATED COMPLEX SUBUNIT 5A (MAC5A)	24.7443	21.5778	25.0769	23.7997
AT1G07370	PROLIFERATING CELLULAR NUCLEAR ANTIGEN 1 (PCNA1)	17.9671	12.9303	16.522	15.8064
AT1G07380	Neutral/alkaline non-lysosomal ceramidase	9.59848	11.7478	10.7357	10.694
AT1G07400	HSP20-like chaperones superfamily protein	3.25337	4.27593	7.77215	5.10048
AT1G07410	RAB GTPASE HOMOLOG A2B (RABA2b)	2.33375	1.8868	1.68395	1.96817
AT1G07420	STEROL 4-ALPHA-METHYL-OXIDASE 2-1 (SMO2-1)	17.3715	13.3782	14.31	15.0199
AT1G07470	Transcription factor IIA%2C alpha/beta subunit	6.65384	7.0207	5.90549	6.52668
AT1G07480	Transcription factor IIA%2C alpha/beta subunit	6.17877	6.27401	5.0449	5.83256
AT1G07500	hypothetical protein	4.17924	6.69242	9.0463	6.63932
AT1G07510	FTSH PROTEASE 10 (ftsh10)	15.7082	14.4568	17.8722	16.0124
AT1G07520	GRAS family transcription factor	7.48204	7.84488	5.71209	7.013
AT1G07530	SCARECROW-LIKE 14 (SCL14)	26.2557	36.9746	33.4344	32.2215
AT1G07570	(APK1A)	8.55794	7.33956	7.05439	7.65063
AT1G07590	Tetratricopeptide repeat (TPR)-like superfamily protein	27.6845	19.2302	53.7356	33.5501
AT1G07610	METALLOTHIONEIN 1C (MT1C)	34.0397	22.9283	44.7444	33.9041
AT1G07615	OBG A-1	9.57612	10.0871	10.2946	9.98595
AT1G07630	POL-LIKE 5 (PLL5)	24.639	18.5973	24.1552	22.4639
AT1G07650	Leucine-rich repeat transmembrane protein kinase	3.21529	2.95673	3.09973	3.09058
AT1G07660	Histone superfamily protein	43.125	41.6301	39.5815	41.4455
AT1G07670	ENDOMEMBRANE-TYPE CA-ATPASE 4 (ECA4)	32.5974	31.2431	38.5434	34.128
AT1G07700	Thioredoxin superfamily protein	1.96283	2.108	2.40052	2.15712
AT1G07705	NEGATIVE ON TATA LESS2A; NOT2A	7.55135	7.11119	7.5231	7.39521
AT1G07720	3-KETOACYL-COA SYNTHASE 3 (KCS3)	4.7683	4.24315	3.29862	4.10336
AT1G07740	Tetratricopeptide repeat (TPR)-like superfamily protein	1.21723	1.49055	1.21677	1.30818
AT1G07745	HOMOLOG OF RAD51 D (RAD51D)	2.32364	2.88569	2.21328	2.4742
AT1G07750	RmlC-like cupins superfamily protein	19.4895	22.4637	20.97	20.9744
AT1G07770	RIBOSOMAL PROTEIN S15A (RPS15A)	96.5551	112.464	92.5802	100.533
AT1G07780	PHOSPHORIBOSYLANTHRANILATE ISOMERASE 1 (PAI1)	6.44831	7.02297	6.52529	6.66552
AT1G07790	(HTB1)	62.3175	56.2821	52.9254	57.175
AT1G07810	ER-TYPE CA2+-ATPASE 1 (ECA1)	25.0416	26.5146	30.5547	27.3703
AT1G07820	Histone superfamily protein	109.572	110.294	99.2045	106.357
AT1G07830	ribosomal protein L29 family protein	24.1906	28.4729	30.3077	27.6571
AT1G07840	Sas10/Utp3/C1D family	7.92605	8.38308	8.66079	8.32331
AT1G07870	Protein kinase superfamily protein	13.1071	12.3209	13.7378	13.0553
AT1G07880	(ATMPK13)	4.56429	3.59733	1.03491	3.06551
AT1G07890	ASCORBATE PEROXIDASE 1 (APX1)	139.585	113.926	126.659	126.723
AT1G07901	hypothetical protein	7.59121	8.84274	7.19736	7.8771
AT1G07910	RNALIGASE (RNL)	2.6183	2.78125	2.9402	2.77992
AT1G07920	GTP binding Elongation factor Tu family protein	326.637	335.52	343.403	335.187
AT1G07930	GTP binding Elongation factor Tu family protein	285.201	292.495	312.149	296.615
AT1G07940	GTP binding Elongation factor Tu family protein	307.554	315.924	325.026	316.168
AT1G07950	(MED22B)	12.0105	11.2181	12.4666	11.8984
AT1G07960	PDI-LIKE 5-1 (PDIL5-1)	13.3437	13.4622	14.414	13.74
AT1G07970	cytochrome B561%2C amino-terminal protein	9.41532	9.08677	8.81459	9.10556
AT1G07980	"NUCLEAR FACTOR Y, SUBUNIT C10" (NF-YC10)	7.75495	7.85179	10.4565	8.68775
AT1G07985	Expressed protein	0.662805	0.701644	1.81931	1.06125
AT1G07990	SIT4 phosphatase-associated family protein	11.7521	12.7678	12.7462	12.422
AT1G08000	GATA TRANSCRIPTION FACTOR 10 (GATA10)	4.69373	4.3029	4.12212	4.37292
AT1G08010	GATA TRANSCRIPTION FACTOR 11 (GATA11)	7.13887	7.24154	6.42912	6.93651
AT1G08030	TYROSYLPROTEIN SULFOTRANSFERASE (TPST)	7.12359	6.99541	6.81926	6.97942
AT1G08040	trimethylguanosine synthase (DUF707)	8.58937	7.81762	7.91156	8.10618
AT1G08050	Zinc finger (C3HC4-type RING finger) family protein	9.47395	5.8845	9.677	8.34515
AT1G08060	MORPHEUS MOLECULE (MOM)	5.64735	5.72067	5.54175	5.63659
AT1G08070	ORGANELLE TRANSCRIPT PROCESSING 82 (OTP82)	1.21658	1.45718	1.38541	1.35306
AT1G08090	NITRATE TRANSPORTER 2:1 (NRT2:1)	1.0802	1.34302	0.839519	1.08758
AT1G08110	ATGLYI2; GLYOXALASE12	20.3643	25.5515	20.8702	22.262
AT1G08115		13.4172	10.6371	18.7561	14.2701
AT1G08120	TP53-regulating kinase-like protein	2.21863	2.58441	2.8047	2.53592
AT1G08125	S-adenosyl-L-methionine-dependent methyltransferases superfamily protein	6.94543	6.96633	7.46451	7.12543
AT1G08130	DNA LIGASE 1 (LIG1)	8.94619	7.59455	6.93617	7.82564
AT1G08180	cyclin-dependent kinase inhibitor	5.15867	6.4734	6.30314	5.9784
AT1G08190	VACUOLAR PROTEIN SORTING 41 (VPS41)	12.2444	12.2372	11.552	12.0112
AT1G08200	UDP-D-APIOSE/UDP-D-XYLOSE SYNTHASE 2 (AXS2)	42.3168	34.2352	46.3117	40.9546
AT1G08210	Eukaryotic aspartyl protease family protein	7.08692	8.59561	6.25184	7.31146
AT1G08220	ATPase complex subunit	4.3751	4.0522	5.12027	4.51586
AT1G08230	Transmembrane amino acid transporter family protein	2.74837	5.14186	3.05459	3.64827
AT1G08250	AROGENATE DEHYDRATASE 6 (ADT6)	5.72977	4.27737	3.31643	4.44119
AT1G08260	TILTED 1 (TIL1)	6.23677	5.47371	5.36248	5.69099
AT1G08270	vacuolar protein sorting-associated protein	3.65591	3.0345	3.68678	3.45906
AT1G08280	GALT29A; GLYCOSYLTRANSFERASE 29A	6.99948	5.50552	5.89493	6.13331
AT1G08290	WIP DOMAIN PROTEIN 3 (WIP3)	5.06402	2.78075	2.60637	3.48371
AT1G08300	NO VEIN-LIKE (NVL)	2.31881	2.58105	2.75425	2.55137
AT1G08315	ARM repeat superfamily protein	19.4558	15.8173	25.3601	20.2111
AT1G08350	Endomembrane protein 70 protein family	5.08181	4.44607	4.32914	4.61901
AT1G08360	Ribosomal protein L1p/L10e family	161.14	164.349	165.249	163.579
AT1G08370	DECAPPING 1 (DCP1)	19.276	17.3429	18.6144	18.4111
AT1G08390	recQ-mediated instability-like protein	2.02759	1.87318	1.29355	1.73144
AT1G08400	RINT-1 / TIP-1 family	3.5073	3.49458	3.4515	3.48446
AT1G08410	P-loop containing nucleoside triphosphate hydrolases superfamily protein	14.9491	12.8088	16.0341	14.5974
AT1G08420	BRI1 SUPPRESSOR 1 (BSU1)-LIKE 2 (BSL2)	10.5517	10.467	12.2129	11.0772
AT1G08430	ALUMINUM-ACTIVATED MALATE TRANSPORTER 1 (ALMT1)	3.27685	2.97261	3.21662	3.15536
AT1G08450	CALRETICULIN 3 (CRT3)	20.7899	16.9785	18.9882	18.9189
AT1G08460	HISTONE DEACETYLASE 8 (HDA08)	14.4515	15.4119	13.5856	14.483
AT1G08465	YABBY2 (YAB2)	3.06009	3.48053	3.0468	3.19581
AT1G08470	STRICTOSIDINE SYNTHASE-LIKE 3 (SSL3)	10.9018	8.18127	8.07849	9.05384
AT1G08480	SUCCINATE DEHYDROGENASE 6 (SDH6)	37.7987	33.6645	38.5518	36.6717
AT1G08490	CHLOROPLASTIC NIFS-LIKE CYSTEINE DESULFURASE (CPNIFS)	9.98809	8.3451	9.36653	9.23324
AT1G08510	FATTY ACYL-ACP THIOESTERASES B (FATB)	19.9378	19.0304	20.8377	19.9353
AT1G08520	ALBINA 1 (ALB1)	3.73945	5.37969	3.76643	4.29519
AT1G08530	chitinase-like protein	5.3529	4.07553	4.79759	4.74201
AT1G08540	RNAPOLYMERASE SIGMA SUBUNIT 2 (SIG2)	2.20284	2.25186	2.19612	2.21694
AT1G08550	NON-PHOTOCHEMICAL QUENCHING 1 (NPQ1)	1.9277	2.80679	2.47869	2.40439
AT1G08560	SYNTAXIN OF PLANTS 111 (SYP111)	39.4146	30.4063	25.1842	31.6684
AT1G08570	ATYPICAL CYS HIS RICH THIOREDOXIN 4 (ACHT4)	17.2645	32.1991	20.2493	23.2376
AT1G08580	hypothetical protein	25.9895	19.6545	22.4225	22.6888
AT1G08590	ATPXL1; PHLOEM INTERCALATED WITH XYLEM-LIKE 1; PXL1; PXY-LIKE1	1.0888	1.18265	1.06581	1.11242
AT1G08600	(ATRX)	6.70637	7.35203	7.77165	7.27668
AT1G08610	Pentatricopeptide repeat (PPR) superfamily protein	5.50005	6.04423	5.10991	5.5514
AT1G08620	(PKDM7D)	9.48025	8.25332	10.1948	9.30946
AT1G08630	THREONINE ALDOLASE 1 (THA1)	0.757239	7.81639	3.02955	3.86773
AT1G08640	CHLOROPLAST J-LIKE DOMAIN 1 (CJD1)	9.73302	10.5439	11.2191	10.4987
AT1G08650	PHOSPHOENOLPYRUVATE CARBOXYLASE KINASE 1 (PPCK1)	68.8448	100.785	67.7116	79.1138
AT1G08660	MALE GAMETOPHYTE DEFECTIVE 2 (MGP2)	17.4779	16.9874	15.5943	16.6865
AT1G08680	ARF GAP-LIKE ZINC FINGER-CONTAINING PROTEIN ZIGA4 (ZIGA4)	5.96258	6.03554	5.77116	5.9231
AT1G08700	PRESENILIN-1 (PS1)	26.9087	23.3276	24.2552	24.8305
AT1G08710	F-box family protein	5.75463	6.10015	6.00173	5.95217
AT1G08720	ENHANCED DISEASE RESISTANCE 1 (EDR1)	9.22524	9.9593	9.27882	9.48779
AT1G08750	ATGPI8; GPI8	3.59952	3.80757	3.25481	3.55397
AT1G08760	GPI-anchored adhesin-like protein%2C putative (DUF936)	12.3306	12.2877	13.135	12.5844
AT1G08770	PRENYLATED RAB ACCEPTOR 1.E (PRA1.E)	12.8901	12.7926	14.0036	13.2288
AT1G08780	ABI3-INTERACTING PROTEIN 3 (AIP3)	11.6638	11.6027	12.5182	11.9282
AT1G08800	MYOB1; MYOSIN BINDING PROTEIN 1	13.9096	13.4413	18.2206	15.1905
AT1G08820	VAMP/SYNAPTOBREVIN-ASSOCIATED PROTEIN 27-2 (VAP27-2)	18.2987	17.2397	18.3609	17.9664
AT1G08830	COPPER/ZINC SUPEROXIDE DISMUTASE 1 (CSD1)	21.912	17.0519	42.3224	27.0954
AT1G08840	EMBRYO DEFECTIVE 2411 (emb2411)	1.45282	1.59219	1.38055	1.47518
AT1G08845	Ribosomal L18p/L5e family protein	2.62627	2.53678	2.58788	2.58365
AT1G08880	(H2AXA)	60.9744	50.8314	53.4466	55.0841
AT1G08890	Major facilitator superfamily protein	2.59267	2.76262	2.67187	2.67572
AT1G08910	zinc ion binding protein	4.54071	5.52203	5.31261	5.12512
AT1G08920	ERD (EARLY RESPONSE TO DEHYDRATION) SIX-LIKE 1 (ESL1)	9.13109	7.53566	9.00799	8.55825
AT1G08930	EARLY RESPONSE TO DEHYDRATION 6 (ERD6)	18.0788	16.857	31.1728	22.0362
AT1G08940	Phosphoglycerate mutase family protein	28.3796	24.012	43.779	32.0569
AT1G08960	CATION EXCHANGER 11 (CAX11)	6.93798	5.50963	4.52729	5.6583
AT1G08970	"NUCLEAR FACTOR Y, SUBUNIT C9" (NF-YC9)	31.1904	31.639	30.5326	31.1207
AT1G08980	AMIDASE 1 (AMI1)	2.19227	2.78385	1.79934	2.25849
AT1G09000	NPK1-RELATED PROTEIN KINASE 1 (NP1)	1.91695	1.60414	1.50509	1.67539
AT1G09010	glycoside hydrolase family 2 protein	11.9319	16.2972	12.6928	13.6406
AT1G09020	HOMOLOG OF YEAST SUCROSE NONFERMENTING 4 (SNF4)	10.6519	9.61633	10.5083	10.2588
AT1G09040	arginine-glutamic acid dipeptide repeat protein	1.86678	2.27343	2.08806	2.07609
AT1G09050	arginine-glutamic acid dipeptide repeat protein	2.42006	2.61517	2.41087	2.48203
AT1G09060	JMJ24	10.4412	11.3198	9.98578	10.5823
AT1G09070	SOYBEAN GENE REGULATED BY COLD-2 (SRC2)	67.1421	70.8361	91.7985	76.5922
AT1G09100	26S PROTEASOME AAA-ATPASE SUBUNIT RPT5B (RPT5B)	17.5466	17.9303	23.8022	19.7597
AT1G09130	ATP-dependent caseinolytic (Clp) protease/crotonase family protein	14.1389	15.0607	16.2869	15.1622
AT1G09140	SERINE/ARGININE-RICH PROTEIN SPLICING FACTOR 30 (SR30)	25.6647	31.9113	34.2136	30.5965
AT1G09150	pseudouridine synthase and archaeosine transglycosylase (PUA) domain-containing protein	11.5823	11.5205	9.94926	11.0173
AT1G09160	Protein phosphatase 2C family protein	9.87347	8.54293	8.41829	8.9449
AT1G09190	Tetratricopeptide repeat (TPR)-like superfamily protein	2.5734	2.51163	2.5379	2.54098
AT1G09195	Ppx-GppA phosphatase	2.44291	2.8731	1.90231	2.40611
AT1G09200	Histone superfamily protein	133.503	102.764	126.42	120.896
AT1G09210	CALRETICULIN 1B (CRT1b)	44.6237	40.3344	46.294	43.7507
AT1G09220	Pentatricopeptide repeat (PPR) superfamily protein	1.76323	1.4454	1.85054	1.68639
AT1G09230	RNA-binding (RRM/RBD/RNP motifs) family protein	5.35439	5.96261	5.40516	5.57406
AT1G09250	basic helix-loop-helix (bHLH) DNA-binding superfamily protein	29.0364	30.4738	32.3991	30.6364
AT1G09270	IMPORTIN ALPHA ISOFORM 4 (IMPA-4)	19.227	18.8162	19.6464	19.2299
AT1G09280	rhodanese-like domain protein	13.4605	16.6505	15.3134	15.1415
AT1G09290	hypothetical protein	7.02546	7.1461	6.1922	6.78792
AT1G09300	ATICP55	2.80932	2.6135	2.87803	2.76695
AT1G09310	plant/protein (Protein of unknown function%2C DUF538)	31.3766	13.8622	15.2574	20.1654
AT1G09320	agenet domain-containing protein	5.20433	6.43012	5.50421	5.71288
AT1G09330	golgi apparatus membrane protein-like protein ECHIDNA protein	12.9889	12.31	14.6599	13.3196
AT1G09380	UMAMIT25; USUALLY MULTIPLE ACIDS MOVE IN AND OUT TRANSPORTERS 25	1.75882	0.708946	1.85712	1.44163
AT1G09390	GDSL-like Lipase/Acylhydrolase superfamily protein	0.989955	4.21859	1.18242	2.13032
AT1G09410	pentatricopeptide (PPR) repeat-containing protein	1.30826	1.24394	1.16501	1.23907
AT1G09415	NIM1-INTERACTING 3 (NIMIN-3)	14.5657	14.7633	11.5506	13.6265
AT1G09420	GLUCOSE-6-PHOSPHATE DEHYDROGENASE 4 (G6PD4)	4.09323	4.43347	3.9707	4.1658
AT1G09430	ATP-CITRATE LYASE A-3 (ACLA-3)	20.1571	20.1813	20.5781	20.3055
AT1G09450	HASPIN-RELATED GENE (Haspin)	3.35983	2.91168	2.74294	3.00482
AT1G09460	Carbohydrate-binding X8 domain superfamily protein	75.4832	100.022	35.5333	70.3461
AT1G09470	ATNEAP3	2.37461	1.79953	1.1637	1.77928
AT1G09480	NAD(P)-binding Rossmann-fold superfamily protein	2.9146	2.53877	4.92547	3.45961
AT1G09486		5.91305	6.19099	6.62522	6.24308
AT1G09490	NAD(P)-binding Rossmann-fold superfamily protein	8.47904	9.13056	10.1288	9.24613
AT1G09500	NAD(P)-binding Rossmann-fold superfamily protein	1.88627	1.01189	1.7602	1.55279
AT1G09520	hypothetical protein	24.9409	26.8204	23.9543	25.2385
AT1G09540	MYB DOMAIN PROTEIN 61 (MYB61)	2.79059	3.58879	1.68581	2.6884
AT1G09560	GERMIN-LIKE PROTEIN 5 (GLP5)	63.8137	51.7329	92.7203	69.4223
AT1G09570	PHYTOCHROME A (PHYA)	34.1828	46.1466	39.506	39.9451
AT1G09575	calcium uniporter-like protein (DUF607)	3.38455	3.72207	3.60728	3.5713
AT1G09580	emp24/gp25L/p24 family/GOLD family protein	2.73776	2.44187	2.26317	2.48094
AT1G09590	Translation protein SH3-like family protein	177.593	159.782	172.783	170.053
AT1G09620	ATP binding/leucine-tRNA ligases/aminoacyl-tRNA ligase	53.343	55.0414	53.7734	54.0526
AT1G09630	RAB GTPASE 11C (RAB11c)	20.2059	19.5276	19.2009	19.6448
AT1G09640	Translation elongation factor EF1B%2C gamma chain	141.626	162.844	156.62	153.697
AT1G09645	transmembrane protein	11.3886	11.2229	10.0141	10.8752
AT1G09660	RNA-binding KH domain-containing protein	8.08646	8.42749	10.2944	8.93612
AT1G09680	Pentatricopeptide repeat (PPR) superfamily protein	3.82057	3.80241	3.59999	3.74099
AT1G09690	Translation protein SH3-like family protein	247.775	240.778	254.004	247.519
AT1G09700	HYPONASTIC LEAVES 1 (HYL1)	8.51096	9.29246	9.86124	9.22156
AT1G09710	Homeodomain-like superfamily protein	1.3894	2.43802	1.61438	1.81394
AT1G09730	ARABIDOPSIS SUMO PROTEASE 1; ASP1	10.1743	10.9346	12.1219	11.0769
AT1G09740	Adenine nucleotide alpha hydrolases-like superfamily protein	10.941	10.2646	17.4225	12.876
AT1G09760	U2 SMALL NUCLEAR RIBONUCLEOPROTEIN A (U2A')	17.7229	18.3342	17.6052	17.8875
AT1G09770	CELL DIVISION CYCLE 5 (CDC5)	89.7676	114.377	110.021	104.722
AT1G09780	2,3-BIPHOSPHOGLYCERATE-INDEPENDENT PHOSPHOGLYCERATE MUTASE 1 (iPGAM1)	57.4887	46.5297	57.0664	53.6949
AT1G09794	Cox19 family protein (CHCH motif)	1.99449	2.57313	2.48139	2.34967
AT1G09795	ATP PHOSPHORIBOSYL TRANSFERASE 2 (ATP-PRT2)	4.58902	5.4191	4.8128	4.94031
AT1G09800	Pseudouridine synthase family protein	1.43465	1.34809	1.57309	1.45194
AT1G09810	EVOLUTIONARILY CONSERVED C-TERMINAL REGION 11 (ECT11)	5.70562	5.36491	5.8592	5.64324
AT1G09812	multidrug resistance protein	5.29908	4.43648	3.73685	4.4908
AT1G09815	POLYMERASE DELTA 4 (POLD4)	50.8018	50.8065	61.3175	54.3086
AT1G09820	Pentatricopeptide repeat (PPR-like) superfamily protein	4.02519	3.72274	4.28559	4.01117
AT1G09830	PURINE BIOSYNTHESIS 2 (PUR2)	12.6794	11.4903	11.9659	12.0452
AT1G09840	SHAGGY-LIKE PROTEIN KINASE 41 (SK41)	25.0554	23.246	21.2734	23.1916
AT1G09850	XYLEM BARK CYSTEINE PEPTIDASE 3 (XBCP3)	9.60119	7.66569	8.24544	8.50411
AT1G09870	histidine acid phosphatase family protein	11.7504	10.7135	10.7885	11.0841
AT1G09900	Pentatricopeptide repeat (PPR-like) superfamily protein	5.9647	5.97555	5.81022	5.91682
AT1G09910	Rhamnogalacturonate lyase family protein	5.86084	6.67046	5.37979	5.97036
AT1G09920	TRAF-type zinc finger-like protein	7.93813	7.41607	9.96132	8.4385
AT1G09932	Phosphoglycerate mutase family protein	1.36605	1.06543	1.07329	1.16826
AT1G09940	(HEMA2)	10.6618	11.2652	14.7527	12.2266
AT1G09950	RESPONSE TO ABA AND SALT 1 (RAS1)	2.48802	2.73181	1.50909	2.24297
AT1G09960	SUCROSE TRANSPORTER 4 (SUT4)	6.17488	7.33998	4.22455	5.91314
AT1G09970	(LRR XI-23)	271.134	229.872	225.026	242.011
AT1G09980	Putative serine esterase family protein	11.8185	10.2077	11.6203	11.2155
AT1G09995	DNA repair DEAD helicase RAD3/XP-D subfamily protein	3.84033	3.04269	3.28277	3.3886
AT1G10020	formin-like protein (DUF1005)	16.7314	18.6023	15.3543	16.896
AT1G10030	HOMOLOG OF YEAST ERGOSTEROL28 (ERG28)	5.05267	5.10797	4.1636	4.77475
AT1G10040	alpha/beta-Hydrolases superfamily protein	3.09737	3.94215	3.49441	3.51131
AT1G10050	glycosyl hydrolase family 10 protein / carbohydrate-binding domain-containing protein	6.09261	6.60185	6.60712	6.43386
AT1G10070	BRANCHED-CHAIN AMINO ACID TRANSAMINASE 2 (BCAT-2)	0.87657	18.2243	4.97629	8.02572
AT1G10090	Early-responsive to dehydration stress protein (ERD4)	1.21173	1.25048	0.928192	1.13013
AT1G10095	Protein prenylyltransferase superfamily protein	1.70177	2.20469	1.49022	1.79889
AT1G10120	CIB4; CRY2-INTERACTING BHLH 4	6.46775	9.65619	4.75044	6.95813
AT1G10130	ENDOPLASMIC RETICULUM-TYPE CALCIUM-TRANSPORTING ATPASE 3 (ECA3)	6.39044	6.10096	6.83847	6.44329
AT1G10140	Uncharacterized conserved protein UCP031279	105.839	160.85	171.248	145.979
AT1G10150	Carbohydrate-binding protein	9.28274	13.661	15.6331	12.859
AT1G10170	NF-X-LIKE 1 (NFXL1)	27.0534	27.4487	45.5208	33.3409
AT1G10180	LOW protein: exocyst complex component-like protein	15.0565	15.4003	13.5457	14.6675
AT1G10200	WLIM1 (WLIM1)	25.6869	28.8447	25.6815	26.7377
AT1G10210	MITOGEN-ACTIVATED PROTEIN KINASE 1 (MPK1)	6.24111	9.05154	5.58144	6.95803
AT1G10230	SKP1-LIKE 18 (SK18)	16.2768	16.245	20.7802	17.7673
AT1G10240	FAR1-RELATED SEQUENCE 11 (FRS11)	4.68511	5.13937	4.38965	4.73804
AT1G10250	paired amphipathic helix Sin3-like protein	1.69068	2.15984	2.31953	2.05668
AT1G10270	GLUTAMINE-RICH PROTEIN 23 (GRP23)	13.8963	11.1594	15.4259	13.4939
AT1G10280	Core-2/I-branching beta-1%2C6-N-acetylglucosaminyltransferase family protein	2.61982	2.30337	2.20142	2.37487
AT1G10290	DYNAMIN-LIKE PROTEIN 6 (ADL6)	14.759	13.4991	16.1994	14.8192
AT1G10300	Nucleolar GTP-binding protein	4.74291	4.11876	4.49907	4.45358
AT1G10310	NAD(P)-binding Rossmann-fold superfamily protein	3.61386	4.12966	3.92164	3.88838
AT1G10320	Zinc finger C-x8-C-x5-C-x3-H type family protein	6.75512	7.76684	7.28512	7.26903
AT1G10330	Tetratricopeptide repeat (TPR)-like superfamily protein	1.83176	1.43023	0.85695	1.37298
AT1G10350	DNAJ heat shock family protein	8.45207	8.30824	8.07538	8.27856
AT1G10390	DRA2; DRACULA2	30.7127	30.3451	32.5825	31.2134
AT1G10400	UDP-Glycosyltransferase superfamily protein	7.48686	4.01634	3.03114	4.84478
AT1G10410	CW14 protein (DUF1336)	22.5004	24.1143	26.1382	24.251
AT1G10430	PROTEIN PHOSPHATASE 2A-2 (PP2A-2)	11.5668	13.5083	13.7526	12.9426
AT1G10450	SIN3-LIKE 6 (SNL6)	9.98906	10.7065	11.5158	10.7371
AT1G10460	GERMIN-LIKE PROTEIN 7 (GLP7)	24.0662	13.2721	14.7994	17.3792
AT1G10470	RESPONSE REGULATOR 4 (ARR4)	117.224	70.7446	93.2479	93.7388
AT1G10480	ZINC FINGER PROTEIN 5 (ZFP5)	19.2388	8.37243	16.0379	14.5497
AT1G10490	GNAT acetyltransferase (DUF699)	7.09428	6.84238	6.58971	6.84212
AT1G10500	CHLOROPLAST-LOCALIZED ISCA-LIKE PROTEIN (CPISCA)	15.4198	15.7078	18.8144	16.6473
AT1G10510	EMBRYO DEFECTIVE 2004 (emb2004)	4.39981	5.18963	5.36826	4.9859
AT1G10520	DNA POLYMERASE \{LAMBDA\} (Pol\{lambda\})	1.4193	1.38296	1.22293	1.34173
AT1G10522	PLASTID REDOX INSENSITIVE 2 (PRIN2)	2.57946	2.4758	2.81682	2.62403
AT1G10530	D-ribose-binding periplasmic protein	4.47185	5.51169	6.04905	5.3442
AT1G10540	NUCLEOBASE-ASCORBATE TRANSPORTER 8 (NAT8)	1.75994	2.71443	2.23625	2.23688
AT1G10570	OVERLY TOLERANT TO SALT 2 (OTS2)	10.798	10.8912	11.9628	11.2173
AT1G10580	Transducin/WD40 repeat-like superfamily protein	24.7364	23.9445	24.4677	24.3828
AT1G10585	basic helix-loop-helix (bHLH) DNA-binding superfamily protein	3.77283	0.850943	3.40157	2.67512
AT1G10590	Nucleic acid-binding%2C OB-fold-like protein	70.3058	74.5865	78.779	74.5571
AT1G10600	ASSOCIATED MOLECULE WITH THE SH3 DOMAIN OF STAM 2 (AMSH2)	5.04499	7.26719	4.47751	5.59656
AT1G10610	basic helix-loop-helix (bHLH) DNA-binding superfamily protein	1.54688	2.43332	1.56143	1.84721
AT1G10630	ADP-RIBOSYLATION FACTOR A1F (ARFA1F)	31.9925	29.5943	32.8493	31.4787
AT1G10650	SBP (S-ribonuclease binding protein) family protein	4.1249	3.66891	2.68806	3.49396
AT1G10660	transmembrane protein	4.84042	6.36869	4.14929	5.11947
AT1G10670	ATP-CITRATE LYASE A-1 (ACLA-1)	35.0949	31.6182	35.2083	33.9738
AT1G10682	SHORT OPEN READING FRAME 1; SORF1	7.58895	16.1956	9.62391	11.1362
AT1G10690	cyclin-dependent kinase inhibitor	6.75595	6.4431	5.82189	6.34031
AT1G10700	PHOSPHORIBOSYL PYROPHOSPHATE (PRPP) SYNTHASE 3 (PRS3)	8.7593	7.16227	9.89886	8.60681
AT1G10720	BSD domain-containing protein	16.372	15.5569	17.0088	16.3126
AT1G10730	ADAPTOR PROTEIN-1 MU-ADAPTIN 1; AP1M1	5.65725	5.40893	5.68561	5.58393
AT1G10740	alpha/beta-Hydrolases superfamily protein	8.70328	10.567	8.3822	9.2175
AT1G10750	carboxyl-terminal peptidase%2C putative (DUF239)	5.7539	6.58882	2.44621	4.92964
AT1G10760	STARCH EXCESS 1 (SEX1)	7.94481	10.8304	7.4563	8.74385
AT1G10780	F-box/RNI-like superfamily protein	3.16618	2.29012	2.1162	2.52417
AT1G10820	hypothetical protein (DUF3755)	3.55974	4.52843	3.73887	3.94235
AT1G10830	15-CIS-ZETA-CAROTENE ISOMERASE (Z-ISO)	3.65928	3.58636	3.77442	3.67335
AT1G10840	TRANSLATION INITIATION FACTOR 3 SUBUNIT H1 (TIF3H1)	43.7885	46.7012	49.4854	46.6583
AT1G10850	Leucine-rich repeat protein kinase family protein	3.80805	3.45729	3.07275	3.44603
AT1G10865	cytochrome C oxidase assembly factor	12.3308	12.3046	13.3102	12.6485
AT1G10870	ARF-GAP DOMAIN 4 (AGD4)	4.5606	4.09176	3.91078	4.18771
AT1G10890	arginine/glutamate-rich 1 protein	20.9804	24.5197	29.0862	24.8621
AT1G10900	Phosphatidylinositol-4-phosphate 5-kinase family protein	3.47868	3.07869	2.7672	3.10819
AT1G10910	EMBRYO DEFECTIVE 3103 (EMB3103)	5.23903	7.11907	5.48718	5.94843
AT1G10920	(LOV1)	1.51109	1.91786	0.907281	1.44541
AT1G10930	(RECQ4A)	2.82824	2.40349	2.24405	2.49193
AT1G10940	SNF1-RELATED PROTEIN KINASE 2.4 (SNRK2.4)	45.9572	40.544	48.8125	45.1046
AT1G10950	TRANSMEMBRANE NINE 1 (TMN1)	34.1572	32.3176	35.119	33.8646
AT1G10960	FERREDOXIN 1 (FD1)	3.9324	4.72538	5.67498	4.77759
AT1G10970	ZINC TRANSPORTER 4 PRECURSOR (ZIP4)	4.29151	4.96683	4.06261	4.44031
AT1G10990	transmembrane protein	70.6901	39.5475	67.2505	59.1627
AT1G11000	MILDEW RESISTANCE LOCUS O 4 (MLO4)	6.20637	5.63725	7.81134	6.55165
AT1G11020	RING/FYVE/PHD zinc finger superfamily protein	11.2997	10.7937	9.9294	10.6743
AT1G11050	Protein kinase superfamily protein	15.7197	12.9496	15.9691	14.8795
AT1G11060	ATWAPL1; WAPL1; WINGS APART-LIKE PROTEIN 1	5.67843	6.36551	6.27997	6.10797
AT1G11090	alpha/beta-Hydrolases superfamily protein	12.0194	11.6289	12.58	12.0761
AT1G11100	FRG5; SNF2-RING-HELICASE?LIKE 5	3.32964	3.45225	4.78396	3.85528
AT1G11120	CTTNBP 2 amino-terminal-like protein	2.042	2.02593	1.55544	1.87446
AT1G11125	hypothetical protein	4.16145	4.3077	2.1512	3.54012
AT1G11130	STRUBBELIG (SUB)	14.4794	12.7039	10.3072	12.4968
AT1G11175		7.60996	16.8114	6.61862	10.3466
AT1G11180	SECRETORY CARRIER MEMBRANE PROTEIN 2 (SCAMP2)	0.984181	1.79832	0.77919	1.18723
AT1G11185		74.0656	80.6024	50.2834	68.3171
AT1G11190	BIFUNCTIONAL NUCLEASE I (BFN1)	5.26184	3.11581	4.27379	4.21715
AT1G11200	organic solute transporter ostalpha protein (DUF300)	7.12656	6.79237	6.55569	6.82488
AT1G11220	cotton fiber%2C putative (DUF761)	2.08675	1.46346	0.79756	1.44926
AT1G11240	ribosomal RNA-processing protein	24.1077	24.546	25.4476	24.7004
AT1G11260	SUGAR TRANSPORTER 1 (STP1)	10.3191	40.8319	8.0757	19.7422
AT1G11280	S-locus lectin protein kinase family protein	7.57725	6.85745	4.71969	6.3848
AT1G11290	CHLORORESPIRATORY REDUCTION22 (CRR22)	1.6046	1.24247	1.50216	1.44974
AT1G11310	MILDEW RESISTANCE LOCUS O 2 (MLO2)	17.6894	16.3025	23.4147	19.1355
AT1G11320	GDSL esterase/lipase	2.06928	1.98794	1.66827	1.9085
AT1G11330	S-locus lectin protein kinase family protein	30.0297	22.6894	26.5644	26.4278
AT1G11350	S-DOMAIN-1 13 (SD1-13)	1.98694	1.48395	2.11219	1.86103
AT1G11360	Adenine nucleotide alpha hydrolases-like superfamily protein	23.5073	26.7698	23.7871	24.6881
AT1G11380	PLAC8 family protein	3.44746	7.80603	3.04133	4.76494
AT1G11390	Protein kinase superfamily protein	5.23772	4.85944	5.15118	5.08278
AT1G11400	PARTNER OF Y14-MAGO (PYM)	15.2089	15.7867	15.7023	15.566
AT1G11420	DOMAIN OF UNKNOWN FUNCTION 724 2 (DUF2)	9.01278	8.95995	9.44889	9.14054
AT1G11430	MULTIPLE ORGANELLAR RNA EDITING FACTOR 9 (MORF9)	6.9307	6.85371	6.77626	6.85356
AT1G11440	hypothetical protein	1.5408	2.00015	0.782521	1.44115
AT1G11475	(NRPB10)	18.0257	18.02	18.4432	18.163
AT1G11480	eukaryotic translation initiation factor-like protein	35.617	39.1855	45.0778	39.9601
AT1G11520	pliceosome associated protein-like protein	16.0026	20.2658	21.1861	19.1515
AT1G11530	C-TERMINAL CYSTEINE RESIDUE IS CHANGED TO A SERINE 1 (CXXS1)	0.379974	2.54118	0.350253	1.09047
AT1G11545	XYLOGLUCAN ENDOTRANSGLUCOSYLASE/HYDROLASE 8 (XTH8)	1.94125	1.95702	2.19456	2.03094
AT1G11580	METHYLESTERASE PCR A (PMEPCRA)	1277.28	936.293	1087.86	1100.48
AT1G11592		5.74382	5.78995	4.59682	5.37686
AT1G11600	"CYTOCHROME P450, FAMILY 77, SUBFAMILY B, POLYPEPTIDE 1" (CYP77B1)	5.23718	12.8423	5.93006	8.00317
AT1G11630	Tetratricopeptide repeat (TPR)-like superfamily protein	8.71477	8.57703	8.86925	8.72035
AT1G11650	(RBP45B)	45.4275	51.5798	54.9213	50.6429
AT1G11660	heat shock protein 70 (Hsp 70) family protein	11.1759	10.6784	12.14	11.3314
AT1G11670	MATE efflux family protein	34.3505	22.0732	29.5109	28.6449
AT1G11680	CYTOCHROME P450 51G1 (CYP51G1)	98.8981	94.206	104.016	99.0401
AT1G11710	Pentatricopeptide repeat (PPR) superfamily protein	2.49573	2.34667	2.65889	2.50043
AT1G11720	STARCH SYNTHASE 3 (SS3)	9.22058	9.51419	9.73583	9.4902
AT1G11735	MICRORNA171B (MIR171B)	7.37432	7.05987	7.66898	7.36772
AT1G11750	CLP PROTEASE PROTEOLYTIC SUBUNIT 6 (CLPP6)	8.59054	8.30108	8.61679	8.50281
AT1G11755	LEAF WILTING 1 (LEW1)	3.26467	3.79113	2.73788	3.26456
AT1G11760	(MED32)	10.6957	11.779	10.6106	11.0284
AT1G11780	oxidoreductase%2C 2OG-Fe(II) oxygenase family protein	4.52643	4.27788	3.76357	4.18929
AT1G11790	AROGENATE DEHYDRATASE 1 (ADT1)	4.30695	2.87844	4.46086	3.88208
AT1G11800	endonuclease/exonuclease/phosphatase family protein	6.05543	4.94936	5.74465	5.58315
AT1G11820	O-Glycosyl hydrolases family 17 protein	8.2703	8.01221	6.52529	7.6026
AT1G11840	GLYOXALASE I HOMOLOG (GLX1)	83.0595	69.0627	83.8014	78.6412
AT1G11860	Glycine cleavage T-protein family	22.8824	21.7408	20.1851	21.6028
AT1G11870	SERYL-TRNA SYNTHETASE (SRS)	3.73812	3.94667	3.5937	3.7595
AT1G11880	transferases%2C transferring hexosyl groups	2.81502	3.1468	2.6378	2.86654
AT1G11890	SECRETION 22 (SEC22)	11.1699	9.47206	11.6951	10.779
AT1G11900	Tetratricopeptide repeat (TPR)-like superfamily protein	2.1471	2.37206	1.54152	2.02023
AT1G11905	B-cell receptor-associated protein 31-like protein	11.3618	9.84461	11.4723	10.8929
AT1G11910	ASPARTIC PROTEINASE A1 (APA1)	82.1986	83.9636	83.92	83.3608
AT1G11930	Putative pyridoxal phosphate-dependent enzyme%2C YBL036C type	19.4408	18.6049	17.1607	18.4022
AT1G11940	Core-2/I-branching beta-1%2C6-N-acetylglucosaminyltransferase family protein	4.17289	3.24626	3.84242	3.75386
AT1G11950	Transcription factor jumonji (jmjC) domain-containing protein	4.75654	5.2774	4.11565	4.71653
AT1G11960	ERD (early-responsive to dehydration stress) family protein	4.18983	3.42547	3.40364	3.67298
AT1G12000	Phosphofructokinase family protein	52.0423	39.4821	59.0244	50.1829
AT1G12010	2-oxoglutarate (2OG) and Fe(II)-dependent oxygenase superfamily protein	0.691742	5.21995	1.21623	2.37597
AT1G12020	hypothetical protein	38.8288	32.7911	36.3853	36.0017
AT1G12030	phosphoenolpyruvate carboxylase%2C putative (DUF506)	7.16189	5.71359	7.37783	6.7511
AT1G12040	LEUCINE-RICH REPEAT/EXTENSIN 1 (LRX1)	0.916509	1.94043	0.792671	1.21654
AT1G12050	ATFAH; FAH; FUMARYLACETOACETATE HYDROLASE; SHORT-DAY SENSITIVE CELL DEATHSHORT-DAY SENSITIVE CELL DEATHSHORT-DAY SENSITIVE CELL DEATH 111; SSCD1	9.46275	9.70035	7.39937	8.85415
AT1G12060	BCL-2-ASSOCIATED ATHANOGENE 5 (BAG5)	2.919	2.83511	2.98964	2.91458
AT1G12110	NITRATE TRANSPORTER 1.1 (NRT1.1)	26.7022	14.5519	17.7968	19.6836
AT1G12120	hypothetical protein (DUF863)	25.2526	22.1893	24.6963	24.0461
AT1G12140	FLAVIN-MONOOXYGENASE GLUCOSINOLATE S-OXYGENASE 5 (FMO GS-OX5)	7.41945	5.1061	8.35417	6.9599
AT1G12160	Flavin-binding monooxygenase family protein	14.9515	12.8395	12.7896	13.5269
AT1G12200	FLAVIN MONOOXYGENASE (FMO)	68.8417	85.9566	78.8576	77.8853
AT1G12210	RPS5-LIKE 1 (RFL1)	3.54566	3.23085	3.13023	3.30225
AT1G12220	RESISTANT TO P. SYRINGAE 5 (RPS5)	3.35818	3.71813	3.07109	3.38247
AT1G12230	Aldolase superfamily protein	11.6011	13.4776	9.31664	11.4651
AT1G12240	(ATBETAFRUCT4)	1.11778	2.62146	2.15007	1.9631
AT1G12244	Polynucleotidyl transferase%2C ribonuclease H-like superfamily protein	2.37032	1.96293	1.78599	2.03975
AT1G12250	TL20.3	1.0905	1.482	0.819051	1.13051
AT1G12260	NAC 007 (NAC007)	2.15298	3.85147	1.87657	2.627
AT1G12270	HOP1 (Hop1)	27.9875	25.9415	26.2211	26.7167
AT1G12280	SUPPRESSOR OF MKK1 MKK2 2 (SUMM2)	2.43476	3.69695	3.79749	3.30973
AT1G12290	Disease resistance protein (CC-NBS-LRR class) family	1.42219	2.31025	1.87794	1.87013
AT1G12300	Tetratricopeptide repeat (TPR)-like superfamily protein	2.93442	3.03079	2.48657	2.81726
AT1G12310	Calcium-binding EF-hand family protein	95.8144	98.8441	103.54	99.3995
AT1G12320	ankyrin repeat/KH domain protein (DUF1442)	16.4747	27.2001	11.0631	18.246
AT1G12330	cyclin-dependent kinase-like protein	1.71315	1.73593	1.00403	1.48437
AT1G12340	Cornichon family protein	2.84697	3.17515	2.96416	2.99542
AT1G12350	4-PHOSPHO-PANTO-THENOYLCYSTEINE SYNTHETASE (COAB)	6.35225	6.6202	6.14335	6.37193
AT1G12360	KEULE (KEU)	13.8914	14.2904	14.4802	14.2207
AT1G12370	PHOTOLYASE 1 (PHR1)	1.40307	1.5965	1.21817	1.40591
AT1G12380	hypothetical protein	12.6912	8.98835	7.25919	9.64625
AT1G12390	Cornichon family protein	8.17228	8.32382	7.65784	8.05132
AT1G12400	Nucleotide excision repair%2C TFIIH%2C subunit TTDA	5.13933	5.33142	4.39223	4.95433
AT1G12410	CLP PROTEASE PROTEOLYTIC SUBUNIT 2 (CLP2)	16.806	18.5581	19.4191	18.2611
AT1G12420	ACT DOMAIN REPEAT 8 (ACR8)	20.4281	14.662	14.628	16.5727
AT1G12430	ARMADILLO REPEAT KINESIN 3 (ARK3)	8.62171	8.48608	5.96102	7.6896
AT1G12440	A20/AN1-like zinc finger family protein	37.2827	45.4481	46.1962	42.9756
AT1G12450	SNARE associated Golgi protein family	4.11361	3.64906	3.0238	3.59549
AT1G12460	Leucine-rich repeat protein kinase family protein	3.00249	2.35814	2.2732	2.54461
AT1G12470	zinc ion binding protein	7.84876	7.63008	7.62996	7.70293
AT1G12500	Nucleotide-sugar transporter family protein	6.95209	7.80838	5.91867	6.89305
AT1G12520	COPPER CHAPERONE FOR SOD1 (CCS)	16.0091	15.0001	27.8955	19.6349
AT1G12530	hypothetical protein	5.08263	4.91576	4.7756	4.92466
AT1G12580	PHOSPHOENOLPYRUVATE CARBOXYLASE-RELATED KINASE 1 (PEPKR1)	14.775	17.633	15.0283	15.8121
AT1G12600	UDP-N-acetylglucosamine (UAA) transporter family	1.32117	1.77819	1.75337	1.61758
AT1G12620	Pentatricopeptide repeat (PPR) superfamily protein	2.64436	2.41836	1.85833	2.30702
AT1G12640	LYSOPHOSPHOLIPID ACYLTRANSFERASE 1 (LPLAT1)	18.6137	18.5133	21.7045	19.6105
AT1G12650	rRNA biogenesis RRP36-like protein	14.6633	15.4025	15.9854	15.3504
AT1G12680	PHOSPHOENOLPYRUVATE CARBOXYLASE-RELATED KINASE 2 (PEPKR2)	10.2481	11.5654	11.2225	11.012
AT1G12700	RNA PROCESSING FACTOR 1 (RPF1)	1.61861	1.44055	1.45346	1.50421
AT1G12710	PHLOEM PROTEIN 2-A12 (PP2-A12)	2.41791	2.63913	2.31653	2.45786
AT1G12730	GPI transamidase subunit PIG-U	2.22428	2.37652	1.76777	2.12286
AT1G12740	"CYTOCHROME P450, FAMILY 87, SUBFAMILY A, POLYPEPTIDE 2" (CYP87A2)	20.6308	16.7072	16.3393	17.8924
AT1G12750	RHOMBOID-LIKE PROTEIN 6 (RBL6)	4.07859	3.20263	3.34183	3.54102
AT1G12760	Zinc finger%2C C3HC4 type (RING finger) family protein	21.1358	21.3021	22.6211	21.6863
AT1G12770	EMBRYO DEFECTIVE 1586 (EMB1586)	9.39719	9.59208	8.99075	9.32667
AT1G12775	Pentatricopeptide repeat (PPR) superfamily protein	2.1806	1.92091	1.471	1.8575
AT1G12780	UDP-D-GLUCOSE/UDP-D-GALACTOSE 4-EPIMERASE 1 (UGE1)	49.7559	74.7692	90.6673	71.7308
AT1G12790	DNA ligase-like protein	2.68196	4.13419	3.86324	3.5598
AT1G12800	S1 DOMAIN-CONTAINING RBP; SDP	5.69164	5.89848	5.9004	5.83017
AT1G12805	nucleotide binding protein	292.569	251.009	378.646	307.408
AT1G12810	proline-rich family protein	88.2553	83.0313	129.604	100.297
AT1G12820	AUXIN SIGNALING F-BOX 3 (AFB3)	17.4238	20.8508	19.9177	19.3974
AT1G12830	nucleolin	31.8513	29.4726	34.5853	31.9697
AT1G12840	DE-ETIOLATED 3 (DET3)	25.1593	22.9098	27.8154	25.2948
AT1G12850	Phosphoglycerate mutase family protein	26.7251	24.6797	29.1444	26.8497
AT1G12860	SCREAM 2 (SCRM2)	1.99136	2.46608	1.82431	2.09392
AT1G12880	NUDIX HYDROLASE HOMOLOG 12 (NUDT12)	24.3139	18.3889	14.2791	18.994
AT1G12890	Integrase-type DNA-binding superfamily protein	49.2738	25.2678	30.0944	34.8787
AT1G12910	ANTHOCYANIN11 (ATAN11)	33.8029	37.038	37.759	36.2
AT1G12920	EUKARYOTIC RELEASE FACTOR 1-2 (ERF1-2)	78.0895	90.0083	91.9872	86.695
AT1G12930	ARM repeat superfamily protein	5.69518	5.9735	5.07627	5.58165
AT1G12940	NITRATE TRANSPORTER2.5 (NRT2.5)	4.97159	6.86666	7.7055	6.51458
AT1G12950	ROOT HAIR SPECIFIC 2 (RSH2)	6.79535	5.2965	9.07676	7.0562
AT1G12970	PLANT INTRACELLULAR RAS GROUP-RELATED LRR 3 (PIRL3)	6.13526	6.64381	6.95242	6.57716
AT1G12980	ENHANCER OF SHOOT REGENERATION 1 (ESR1)	2.39311	1.0955	1.45427	1.64763
AT1G12990	beta-1%2C4-N-acetylglucosaminyltransferase family protein	4.94497	4.12745	4.62933	4.56725
AT1G13000	transmembrane protein%2C putative (DUF707)	6.12613	5.46092	7.03941	6.20882
AT1G13020	EUKARYOTIC INITIATION FACTOR 4B2 (EIF4B2)	18.5203	15.4838	16.7568	16.9203
AT1G13030	sphere organelles protein-like protein	6.5994	5.65171	6.16504	6.13872
AT1G13040	Pentatricopeptide repeat (PPR-like) superfamily protein	5.01824	4.37142	4.90785	4.76583
AT1G13050	proline-rich receptor-like kinase	4.12325	3.60532	4.03785	3.92214
AT1G13060	20S PROTEASOME BETA SUBUNIT E1 (PBE1)	37.0196	35.3178	41.1523	37.8299
AT1G13080	"CYTOCHROME P450, FAMILY 71, SUBFAMILY B, POLYPEPTIDE 2" (CYP71B2)	4.98234	3.49016	7.84681	5.43977
AT1G13090	"CYTOCHROME P450, FAMILY 71, SUBFAMILY B, POLYPEPTIDE 28" (CYP71B28)	5.15523	8.07126	6.78186	6.66945
AT1G13120	nucleoporin GLE1-like protein	7.58231	6.96713	6.62896	7.05946
AT1G13140	"CYTOCHROME P450, FAMILY 86, SUBFAMILY C, POLYPEPTIDE 3" (CYP86C3)	1.96213	1.83936	1.32246	1.70798
AT1G13145		5.48416	7.16571	5.66697	6.10561
AT1G13150	"CYTOCHROME P450, FAMILY 86, SUBFAMILY C, POLYPEPTIDE 4" (CYP86C4)	2.67734	3.99418	2.9324	3.20131
AT1G13160	ARM repeat superfamily protein	13.0112	12.1662	14.2043	13.1272
AT1G13170	OSBP(OXYSTEROL BINDING PROTEIN)-RELATED PROTEIN 1D (ORP1D)	11.592	9.92864	9.95738	10.4927
AT1G13180	DISTORTED TRICHOMES 1 (DIS1)	6.44021	5.54846	5.80019	5.92962
AT1G13190	RNA-binding (RRM/RBD/RNP motifs) family protein	26.5366	30.3068	37.6138	31.4857
AT1G13195	RING/U-box superfamily protein	6.8646	7.2305	8.24421	7.44644
AT1G13210	AUTOINHIBITED CA2+/ATPASE II (ACA.l)	21.9007	18.9295	18.5729	19.801
AT1G13220	LITTLE NUCLEI2 (LINC2)	15.8397	15.3097	17.2531	16.1342
AT1G13245	ROTUNDIFOLIA LIKE 17 (RTFL17)	3.89731	22.9979	13.0667	13.3206
AT1G13250	GALACTURONOSYLTRANSFERASE-LIKE 3 (GATL3)	4.34092	2.32252	1.40101	2.68815
AT1G13260	RELATED TO ABI3/VP1 1 (RAV1)	17.6141	39.858	15.0192	24.1638
AT1G13270	METHIONINE AMINOPEPTIDASE 1B (MAP1C)	4.21133	4.2302	4.88211	4.44121
AT1G13280	ALLENE OXIDE CYCLASE 4 (AOC4)	110.766	81.7733	74.9446	89.1614
AT1G13320	PROTEIN PHOSPHATASE 2A SUBUNIT A3 (PP2AA3)	15.1499	14.9934	14.8113	14.9849
AT1G13330	ARABIDOPSIS HOP2 HOMOLOG (AHP2)	1.53839	1.3632	1.91371	1.6051
AT1G13340	Regulator of Vps4 activity in the MVB pathway protein	6.44425	5.73579	8.38399	6.85468
AT1G13350	Protein kinase superfamily protein	5.42968	6.43806	5.8845	5.91741
AT1G13360	hypothetical protein	34.1845	38.0813	39.5186	37.2615
AT1G13370	Histone superfamily protein	1.43242	1.38316	1.22257	1.34605
AT1G13380	sodium/hydrogen exchanger (DUF1218)	28.414	30.0092	26.6323	28.3518
AT1G13390	translocase subunit seca	26.6812	24.399	25.6854	25.5886
AT1G13410	Tetratricopeptide repeat (TPR)-like superfamily protein	1.91323	1.59326	1.66102	1.7225
AT1G13440	GLYCERALDEHYDE-3-PHOSPHATE DEHYDROGENASE C2 (GAPC2)	407.247	477.908	575.614	486.923
AT1G13450	GT-1 (GT-1)	11.1015	12.5475	12.9057	12.1849
AT1G13460	TRUE	7.06669	6.44459	6.00352	6.50493
AT1G13480	hypothetical protein (DUF1262)	4.60702	4.30118	4.98105	4.62975
AT1G13520	hypothetical protein (DUF1262)	4.25239	7.71615	14.7364	8.90164
AT1G13560	AMINOALCOHOLPHOSPHOTRANSFERASE 1 (AAPT1)	9.38423	9.47052	8.45003	9.10159
AT1G13570	F-box/RNI-like superfamily protein	13.94	14.838	12.4495	13.7425
AT1G13580	LAG1 LONGEVITY ASSURANCE HOMOLOG 3 (LAG13)	3.64935	2.38217	2.65668	2.89607
AT1G13590	PHYTOSULFOKINE 1 PRECURSOR (PSK1)	0.796091	2.26569	2.88379	1.98186
AT1G13620	ROOT MERISTEM GROWTH FACTOR 2 (RGF2)	3.25717	4.8302	7.98657	5.35798
AT1G13630	Tetratricopeptide repeat (TPR)-like superfamily protein	1.6744	1.4731	1.74278	1.63009
AT1G13640	Phosphatidylinositol 3- and 4-kinase family protein	21.583	37.2037	30.4936	29.7601
AT1G13690	ATPASE E1 (ATE1)	12.7029	14.673	12.0501	13.142
AT1G13700	6-PHOSPHOGLUCONOLACTONASE 1 (PGL1)	3.01311	4.41382	2.23429	3.22041
AT1G13730	Nuclear transport factor 2 (NTF2) family protein with RNA binding (RRM-RBD-RNP motifs) domain-containing protein	9.84459	10.0113	9.69897	9.85163
AT1G13740	ABI FIVE BINDING PROTEIN 2 (AFP2)	2.40176	4.45149	3.681	3.51141
AT1G13750	Purple acid phosphatases superfamily protein	3.03003	2.45543	2.11675	2.53407
AT1G13770	ROOT UV-B SENSITIVE 3 (RUS3)	4.51336	4.97642	4.8157	4.7685
AT1G13780	F-box/RNI-like/FBD-like domains-containing protein	2.32396	2.50656	2.31733	2.38262
AT1G13790	FACTOR OF DNA METHYLATION 4 (FDM4)	1.82692	1.17726	1.13292	1.37903
AT1G13800	EMBRYONIC FACTOR 19 (FAC19)	2.03336	1.65399	1.5379	1.74175
AT1G13810	Restriction endonuclease%2C type II-like superfamily protein	8.47992	7.41524	9.30766	8.40094
AT1G13820	alpha/beta-Hydrolases superfamily protein	1.55506	1.51733	1.9473	1.67323
AT1G13860	QUASIMODO2 LIKE 1 (QUL1)	5.48747	5.30165	4.92347	5.23753
AT1G13870	DEFORMED ROOTS AND LEAVES 1 (DRL1)	11.0775	10.5209	10.1075	10.5686
AT1G13880	ELM2	17.7834	16.3838	16.8369	17.0014
AT1G13900	PURPLE ACID PHOSPHATASE 2 (PAP2)	12.8733	11.5814	12.5737	12.3428
AT1G13910	Leucine-rich repeat (LRR) family protein	3.15613	3.62487	3.22327	3.33476
AT1G13930	oleosin-B3-like protein	34.7183	70.1747	25.4814	43.4582
AT1G13940	T-box transcription factor%2C putative (DUF863)	7.35518	8.21339	7.24093	7.60317
AT1G13950	EUKARYOTIC ELONGATION FACTOR 5A-1 (ELF5A-1)	6.15145	5.35709	2.54117	4.68323
AT1G13960	WRKY DNA-BINDING PROTEIN 4 (WRKY4)	19.7866	23.4432	23.6759	22.3019
AT1G13970	beta-hexosaminidase (DUF1336)	4.42276	2.94261	3.80165	3.72234
AT1G13980	GNOM (GN)	21.0832	22.5934	19.5428	21.0731
AT1G13990	plant/protein	30.6533	33.2378	43.132	35.6744
AT1G14000	VH1-INTERACTING KINASE (VIK)	21.2875	15.8963	20.8943	19.3594
AT1G14010	emp24/gp25L/p24 family/GOLD family protein	14.7673	12.0993	13.7971	13.5546
AT1G14020	O-fucosyltransferase family protein	3.84195	3.90354	3.03277	3.59275
AT1G14030	LYSINE METHYLTRANSFERASE (LSMT)-LIKE (LSMT-L)	2.07778	3.03887	1.51192	2.20952
AT1G14040	EXS (ERD1/XPR1/SYG1) family protein	4.3935	4.26963	6.17406	4.94573
AT1G14060	GCK domain-containing protein	41.6413	36.8297	54.0855	44.1855
AT1G14070	FUCOSYLTRANSFERASE 7 (FUT7)	4.3059	4.7975	3.4984	4.2006
AT1G14080	FUCOSYLTRANSFERASE 6 (FUT6)	0.81774	1.48679	0.810513	1.03835
AT1G14090		5.23063	5.35714	5.01667	5.20148
AT1G14120	2-oxoglutarate (2OG) and Fe(II)-dependent oxygenase superfamily protein	14.6185	3.7325	9.78114	9.37736
AT1G14130	ATDAO; DAO1; DIOXYGENASE FOR AUXIN OXIDATION 1	39.5654	51.1429	38.4581	43.0555
AT1G14140	UNCOUPLING PROTEIN 3 (UCP3)	6.74575	7.8424	7.25147	7.27987
AT1G14170	RNA-binding KH domain-containing protein	12.2506	8.74973	11.4601	10.8201
AT1G14180	RING/U-box superfamily protein	3.50334	2.83298	2.69109	3.00914
AT1G14200	RING/U-box superfamily protein	9.54509	25.5196	14.5768	16.5472
AT1G14210	Ribonuclease T2 family protein	35.0855	34.5299	27.8486	32.488
AT1G14230	GDA1/CD39 nucleoside phosphatase family protein	14.2755	13.587	13.3211	13.7279
AT1G14240	GDA1/CD39 nucleoside phosphatase family protein	8.5988	3.6144	2.15975	4.79098
AT1G14260	RING/FYVE/PHD zinc finger superfamily protein	3.82462	2.3597	3.96521	3.38318
AT1G14290	SPHINGOID BASE HYDROXYLASE 2 (SBH2)	22.0796	18.2148	15.7152	18.6699
AT1G14300	ARM repeat superfamily protein	12.1351	12.703	14.214	13.0174
AT1G14310	Haloacid dehalogenase-like hydrolase (HAD) superfamily protein	3.02452	2.6774	2.51702	2.73965
AT1G14320	SUPPRESSOR OF ACAULIS 52 (SAC52)	382.87	382.759	458.296	407.975
AT1G14330	Galactose oxidase/kelch repeat superfamily protein	22.6102	23.7647	29.9485	25.4411
AT1G14340	RNA-binding (RRM/RBD/RNP motifs) family protein	9.94917	10.6106	13.1744	11.2447
AT1G14345	NAD(P)-linked oxidoreductase superfamily protein	1.17238	2.52424	0.683821	1.46015
AT1G14350	FOUR LIPS (FLP)	20.6713	16.5361	9.19228	15.4666
AT1G14360	UDP-GALACTOSE TRANSPORTER 3 (UTR3)	10.8091	10.1903	12.1563	11.0519
AT1G14370	PROTEIN KINASE 2A (APK2A)	7.35418	6.44561	7.55868	7.11949
AT1G14380	IQ-DOMAIN 28 (IQD28)	10.9258	11.6092	11.0917	11.2089
AT1G14390	Leucine-rich repeat protein kinase family protein	9.04071	6.17621	9.86421	8.36038
AT1G14400	UBIQUITIN CARRIER PROTEIN 1 (UBC1)	69.075	80.7271	69.6016	73.1345
AT1G14410	WHIRLY 1 (WHY1)	7.1881	8.11972	6.22532	7.17771
AT1G14450	NADH dehydrogenase (ubiquinone)s	20.7922	18.9258	23.1985	20.9721
AT1G14460	AAA-type ATPase family protein	4.21553	3.50245	2.88813	3.53537
AT1G14470	Pentatricopeptide repeat (PPR) superfamily protein	1.66638	1.69353	1.4952	1.61837
AT1G14480	Ankyrin repeat family protein	5.01152	5.13191	2.81809	4.32051
AT1G14510	ALFIN-LIKE 7 (AL7)	31.6837	32.9296	32.2607	32.2913
AT1G14530	TOM THREE HOMOLOG 1 (THH1)	2.55042	2.90885	2.60148	2.68692
AT1G14560	Mitochondrial substrate carrier family protein	8.52788	7.64668	8.77198	8.31551
AT1G14570	ATPUX7; PLANT UBX DOMAIN-CONTAINING PROTEIN 7; PUX7	20.2511	21.1268	23.8594	21.7457
AT1G14590	Nucleotide-diphospho-sugar transferase family protein	3.02254	2.59432	2.59926	2.73871
AT1G14610	TWIN 2 (TWN2)	37.5026	36.0701	40.6683	38.0803
AT1G14620	DECOY (DECOY)	20.7492	19.8627	20.0512	20.221
AT1G14630	XRI1-like protein	18.678	9.62626	8.6826	12.329
AT1G14640	SWAP (Suppressor-of-White-APricot)/surp domain-containing protein	4.59532	5.6099	4.58388	4.9297
AT1G14642	hypothetical protein	2.31693	3.59244	3.76618	3.22519
AT1G14650	SWAP (Suppressor-of-White-APricot)/surp domain-containing protein / ubiquitin family protein	36.4456	41.2677	41.6273	39.7802
AT1G14660	NA+/H+ EXCHANGER 8 (NHX8)	1.31917	1.84309	1.00431	1.38886
AT1G14670	Endomembrane protein 70 protein family	52.6036	45.4194	50.9079	49.6436
AT1G14680	early endosome antigen	3.78219	3.73574	3.90097	3.8063
AT1G14685	BASIC PENTACYSTEINE 2 (BPC2)	21.2788	24.8576	20.3925	22.1763
AT1G14687	HOMEOBOX PROTEIN 32 (HB32)	1.92552	1.84612	1.38468	1.71877
AT1G14690	MICROTUBULE-ASSOCIATED PROTEIN 65-7 (MAP65-7)	19.7748	22.0574	17.9288	19.9203
AT1G14710	hydroxyproline-rich glycoprotein family protein	26.4584	24.3949	26.1477	25.667
AT1G14720	XYLOGLUCAN ENDOTRANSGLUCOSYLASE/HYDROLASE 28 (XTH28)	7.85034	6.15005	4.78869	6.26303
AT1G14740	TITANIA 1 (TTA1)	63.2807	79.866	74.3508	72.4992
AT1G14770	RING/FYVE/PHD zinc finger superfamily protein	6.49943	5.09769	4.65511	5.41741
AT1G14780	MAC/Perforin domain-containing protein	2.63335	1.17966	1.81166	1.87489
AT1G14790	RNA-DEPENDENT RNA POLYMERASE 1 (RDR1)	8.88286	9.49198	5.69408	8.02297
AT1G14810	semialdehyde dehydrogenase family protein	20.1195	18.2845	25.2662	21.2234
AT1G14820	Sec14p-like phosphatidylinositol transfer family protein	18.7877	11.9709	13.0605	14.6064
AT1G14830	DYNAMIN-LIKE 1C (DL1C)	20.6915	17.9174	19.6968	19.4352
AT1G14840	MICROTUBULE-ASSOCIATED PROTEINS 70-4 (MAP70-4)	2.34623	2.04196	2.03752	2.14191
AT1G14850	NUCLEOPORIN 155 (NUP155)	17.0472	17.2269	19.0846	17.7862
AT1G14860	NUDIX HYDROLASE HOMOLOG 18 (NUDT18)	1.15322	1.37365	1.57644	1.36777
AT1G14870	PLANT CADMIUM RESISTANCE 2 (PCR2)	62.4121	54.3878	149.261	88.687
AT1G14890	Plant invertase/pectin methylesterase inhibitor superfamily protein	105.354	125.322	93.4513	108.042
AT1G14900	HIGH MOBILITY GROUP A (HMGA)	64.9346	63.6914	54.3862	61.0041
AT1G14910	ENTH/ANTH/VHS superfamily protein	14.0562	17.3955	15.7173	15.723
AT1G14920	GIBBERELLIC ACID INSENSITIVE (GAI)	5.19042	6.90333	5.23941	5.77772
AT1G14970	O-fucosyltransferase family protein	4.71668	4.71518	4.60188	4.67791
AT1G14980	CHAPERONIN 10 (CPN10)	71.4593	69.9208	76.937	72.7724
AT1G14990	transmembrane protein	5.79517	4.99721	4.80893	5.20044
AT1G15000	SERINE CARBOXYPEPTIDASE-LIKE 50 (scpl50)	5.85408	5.63463	4.64411	5.37761
AT1G15010	mediator of RNA polymerase II transcription subunit	0.526245	1.80675	1.55987	1.29762
AT1G15020	QUIESCIN-SULFHYDRYL OXIDASE 1 (QSOX1)	6.85677	7.9641	7.47421	7.43169
AT1G15030	hypothetical protein (DUF789)	5.91686	6.53605	5.56527	6.00606
AT1G15040	GLUTAMINE AMIDOTRANSFERASE 1_2.1 (GAT1_2.1)	0.673403	9.49431	3.35126	4.50633
AT1G15060	alpha/beta hydrolase family protein	7.12362	6.35961	5.77626	6.41983
AT1G15080	LIPID PHOSPHATE PHOSPHATASE 2 (LPP2)	1.4826	2.05138	0.487907	1.34063
AT1G15100	RING-H2 FINGER A2A (RHA2A)	37.2365	66.1551	51.2696	51.5537
AT1G15110	PHOSPHATIDYLSERINE SYNTHASE 1 (PSS1)	9.36793	11.0667	10.4352	10.2899
AT1G15120	Ubiquinol-cytochrome C reductase hinge protein	41.663	37.2987	45.217	41.3929
AT1G15125	S-adenosyl-L-methionine-dependent methyltransferases superfamily protein	19.349	23.0539	12.6503	18.3511
AT1G15130	Endosomal targeting BRO1-like domain-containing protein	26.6221	25.2046	29.703	27.1766
AT1G15140	FAD/NAD(P)-binding oxidoreductase	5.74227	5.26748	6.74361	5.91779
AT1G15160	MATE efflux family protein	1.67444	1.4716	1.37854	1.50819
AT1G15170	MATE efflux family protein	13.2994	10.7864	15.0169	13.0342
AT1G15190	Fasciclin-like arabinogalactan family protein	3.73685	2.86068	3.97211	3.52321
AT1G15200	protein-protein interaction regulator family protein	38.0902	40.9621	46.15	41.7341
AT1G15210	ATP-BINDING CASSETTE G35 (ABCG35)	26.1646	20.0869	26.0623	24.1046
AT1G15215	SAWADEE HOMEODOMAIN HOMOLOG 1 (SHH1)	5.5363	5.82703	6.23988	5.86774
AT1G15220	(CCMH)	4.54535	4.77895	4.07031	4.46487
AT1G15230	hypothetical protein	29.8499	33.8477	42.1511	35.2829
AT1G15240	phox (PX) domain-containing protein	10.2418	12.3435	10.76	11.1151
AT1G15250	Zinc-binding ribosomal protein family protein	21.5228	22.7758	23.435	22.5779
AT1G15270	Translation machinery associated TMA7	57.8924	55.0986	65.8323	59.6078
AT1G15280	CASC3/Barentsz eIF4AIII binding protein	17.3585	19.2014	17.7418	18.1006
AT1G15310	SIGNAL RECOGNITION PARTICLE 54 KDA SUBUNIT (ATHSRP54A)	6.66417	5.27965	6.95626	6.30003
AT1G15330	Cystathionine beta-synthase (CBS) protein	1.04279	12.7913	1.5412	5.12508
AT1G15340	METHYL-CPG-BINDING DOMAIN 10 (MBD10)	69.1301	84.7696	66.344	73.4146
AT1G15350	DUF4050 family protein	14.1413	19.329	18.1491	17.2065
AT1G15370	SNARE-like superfamily protein	14.9016	13.8136	15.9038	14.873
AT1G15380	GLYOXYLASE I 4 (GLYI4)	9.73669	38.0727	32.587	26.7988
AT1G15385	cotton fiber protein	12.8834	13.1524	35.6269	20.5542
AT1G15390	PEPTIDE DEFORMYLASE 1A (PDF1A)	9.21159	10.209	10.1178	9.84612
AT1G15400	hypothetical protein	16.6551	19.6495	21.7636	19.356
AT1G15405		28.2977	22.0938	36.5249	28.9721
AT1G15410	aspartate-glutamate racemase family	5.16117	4.91123	4.36982	4.81407
AT1G15420	LANT-SPECIFIC COMPONENT OF THE PRE- RRNA PROCESSING COMPLEX1; PCP1	25.1309	26.3764	32.8826	28.13
AT1G15430	hypothetical protein (DUF1644)	11.3289	11.42	15.2944	12.6811
AT1G15440	PERIODIC TRYPTOPHAN PROTEIN 2 (PWP2)	19.3928	19.3954	22.9253	20.5712
AT1G15470	Transducin/WD40 repeat-like superfamily protein	4.08294	3.6797	4.29999	4.02088
AT1G15480	Tetratricopeptide repeat (TPR)-like superfamily protein	8.72632	8.70802	8.29432	8.57622
AT1G15490	alpha/beta-Hydrolases superfamily protein	5.71953	5.82507	4.30101	5.28187
AT1G15500	(ATNTT2)	49.2824	59.4065	54.1881	54.2923
AT1G15510	EARLY CHLOROPLAST BIOGENESIS2 (ECB2)	1.72875	1.8233	1.70918	1.75374
AT1G15520	ATP-BINDING CASSETTE G40 (ABCG40)	0.759205	2.44586	3.27213	2.15907
AT1G15530	Concanavalin A-like lectin protein kinase family protein	5.53916	5.62144	5.21452	5.45837
AT1G15570	CYCLIN A2;3 (CYCA2;3)	5.62289	4.07818	3.80092	4.50066
AT1G15580	INDOLE-3-ACETIC ACID INDUCIBLE 5 (IAA5)	59.4172	22.2085	43.5024	41.7094
AT1G15610	transmembrane protein	6.03098	1.22792	1.44799	2.9023
AT1G15630	transmembrane protein	11.7019	3.50559	3.30243	6.16997
AT1G15640	transmembrane protein	9.34139	3.54333	3.61016	5.49829
AT1G15660	CENTROMERE PROTEIN C (CENP-C)	11.8643	10.0858	10.1938	10.7146
AT1G15670	Galactose oxidase/kelch repeat superfamily protein	82.2495	81.6363	82.9216	82.2691
AT1G15690	(AVP1)	148.187	172.374	168.788	163.116
AT1G15700	(ATPC2)	5.48207	5.21807	4.87789	5.19268
AT1G15710	prephenate dehydrogenase family protein	8.5895	8.43344	8.40865	8.47719
AT1G15720	TRF-LIKE 5 (TRFL5)	3.9154	3.88669	3.29181	3.69797
AT1G15730	Cobalamin biosynthesis CobW-like protein	2.07803	1.75059	1.42677	1.7518
AT1G15740	Leucine-rich repeat family protein	16.0877	22.4449	17.0734	18.5353
AT1G15750	TOPLESS (TPL)	60.2038	64.436	62.2304	62.2901
AT1G15760	Sterile alpha motif (SAM) domain-containing protein	1.47123	1.23941	0.468793	1.05981
AT1G15780	MED15_1; MEDIATOR 15_1; NON-RECOGNITION-OF-BTH 4; NRB4	17.3805	14.9844	18.1339	16.833
AT1G15790	mediator of RNA polymerase II transcription subunit 15a-like protein	7.84852	6.62015	6.93456	7.13441
AT1G15800	hypothetical protein	4.58947	6.05112	5.57797	5.40619
AT1G15810	S15/NS1%2C RNA-binding protein	13.8178	13.4654	11.3978	12.8937
AT1G15820	LIGHT HARVESTING COMPLEX PHOTOSYSTEM II SUBUNIT 6 (LHCB6)	1.18685	2.21059	1.38576	1.5944
AT1G15860	defective in cullin neddylation protein (DUF298)	9.71957	8.93433	12.1098	10.2546
AT1G15870	Mitochondrial glycoprotein family protein	3.10642	2.10554	3.19675	2.8029
AT1G15880	GOLGI SNARE 11 (GOS11)	16.9058	20.2341	18.5788	18.5729
AT1G15885	hypothetical protein	1.17485	1.89297	1.03862	1.36881
AT1G15910	FACTOR OF DNA METHYLATION 1 (FDM1)	16.0494	20.7986	14.6191	17.1557
AT1G15920	Polynucleotidyl transferase%2C ribonuclease H-like superfamily protein	16.1117	18.3983	20.3578	18.2892
AT1G15930	Ribosomal protein L7Ae/L30e/S12e/Gadd45 family protein	129.964	142.794	138.088	136.949
AT1G15940	ATPDS5E; PDS5E	20.7588	24.2606	23.4329	22.8174
AT1G15950	CINNAMOYL COA REDUCTASE 1 (CCR1)	34.6466	33.2786	34.1859	34.037
AT1G15970	DNA glycosylase superfamily protein	5.3941	4.95938	3.60668	4.65338
AT1G16000	GAG1At protein	13.8235	12.2955	15.6828	13.9339
AT1G16010	MAGNESIUM TRANSPORTER 2 (MGT2)	16.6628	16.6221	16.5499	16.6116
AT1G16020	CALCIUM CAFFEINE ZINC SENSITIVITY 1A; CCZ1A	3.23636	2.91607	2.18354	2.77866
AT1G16030	HEAT SHOCK PROTEIN 70B (Hsp70b)	2.95527	3.17835	7.14175	4.42512
AT1G16040	phosphatidylinositol-glycan biosynthesis class F-like protein	7.18672	8.29298	9.1587	8.2128
AT1G16060	ARIA-INTERACTING DOUBLE AP2 DOMAIN PROTEIN (ADAP)	2.22497	1.19083	1.20625	1.54068
AT1G16070	TUBBY LIKE PROTEIN 8 (TLP8)	3.37747	2.98339	2.50876	2.95654
AT1G16080	nuclear protein	8.79552	9.1808	7.72317	8.5665
AT1G16090	WALL ASSOCIATED KINASE-LIKE 7 (WAKL7)	2.2809	2.26734	1.65591	2.06805
AT1G16110	WALL ASSOCIATED KINASE-LIKE 6 (WAKL6)	1.71916	1.80351	1.03622	1.51963
AT1G16170	ephrin-A3 protein	4.62755	4.63828	4.20946	4.49176
AT1G16180	Serinc-domain containing serine and sphingolipid biosynthesis protein	92.3025	90.4126	106.089	96.268
AT1G16190	RADIATION SENSITIVE23A (RAD23A)	11.7022	10.1167	11.1288	10.9826
AT1G16210	coiled-coil protein	37.9816	34.1296	46.638	39.5831
AT1G16220	Protein phosphatase 2C family protein	6.4501	5.88088	4.56981	5.6336
AT1G16240	SYNTAXIN OF PLANTS 51 (SYP51)	27.1262	31.7736	34.9729	31.2909
AT1G16250	Galactose oxidase/kelch repeat superfamily protein	6.21225	6.952	7.27268	6.81231
AT1G16260	Wall-associated kinase family protein	5.00057	3.35953	3.69237	4.01749
AT1G16270	kinase superfamily with octicosapeptide/Phox/Bem1p domain-containing protein	14.0603	12.8071	13.8678	13.5784
AT1G16280	RNA HELICASE 36 (RH36)	6.75765	7.14203	6.87205	6.92391
AT1G16300	GLYCERALDEHYDE-3-PHOSPHATE DEHYDROGENASE OF PLASTID 2 (GAPCP-2)	7.09664	6.77899	9.0052	7.62694
AT1G16310	Cation efflux family protein	2.06761	1.48519	1.7572	1.77
AT1G16320	plant/protein (DUF2358)	5.97268	8.15377	7.84692	7.32446
AT1G16330	CYCLIN B3;1 (CYCB3;1)	1.92277	1.34305	1.33641	1.53408
AT1G16340	(ATKDSA2)	4.83867	4.88193	4.16713	4.62925
AT1G16350	Aldolase-type TIM barrel family protein	44.7514	44.0122	46.882	45.2152
AT1G16370	ORGANIC CATION/CARNITINE TRANSPORTER 6 (OCT6)	4.37035	2.59822	3.03446	3.33434
AT1G16430	Surfeit locus protein 5 subunit 22 of Mediator complex	4.42707	3.70406	3.04059	3.72391
AT1G16460	RHODANESE HOMOLOGUE 2 (RDH2)	10.891	14.8838	9.30962	11.6948
AT1G16470	PROTEASOME SUBUNIT PAB1 (PAB1)	16.4877	15.557	17.1388	16.3945
AT1G16480	Tetratricopeptide repeat (TPR)-like superfamily protein	1.96885	2.15211	2.26813	2.1297
AT1G16490	MYB DOMAIN PROTEIN 58 (MYB58)	2.32613	1.44433	0.790761	1.5204
AT1G16500	filamentous hemagglutinin transporter	6.11674	3.9906	4.01779	4.70838
AT1G16510	SAUR41; SMALL AUXIN UPREGULATED 41	6.75486	7.13707	9.89224	7.92805
AT1G16520	interactor of constitutive active ROPs protein	16.2752	15.4421	13.3297	15.0157
AT1G16540	ABA DEFICIENT 3 (ABA3)	4.75634	5.11371	7.22777	5.69927
AT1G16550		3.18444	3.71651	3.4445	3.44848
AT1G16560	Per1-like family protein	19.4182	18.4435	19.5505	19.1374
AT1G16570	UDP-Glycosyltransferase superfamily protein	6.40863	6.32954	5.40159	6.04659
AT1G16590	(REV7)	3.22661	3.16359	2.19635	2.86218
AT1G16610	ARGININE/SERINE-RICH 45 (SR45)	20.6257	19.5317	21.5059	20.5544
AT1G16630	transmembrane protein	5.31554	3.67171	2.67698	3.88808
AT1G16640	AP2/B3-like transcriptional factor family protein	2.90699	2.32879	1.09933	2.1117
AT1G16650	S-adenosyl-L-methionine-dependent methyltransferases superfamily protein	3.49068	3.84905	3.37579	3.57184
AT1G16670	COLD-RESPONSIVE PROTEIN KINASE 1; CRPK1	11.0163	9.47879	11.0133	10.5028
AT1G16680	Chaperone DnaJ-domain superfamily protein	9.84994	11.3341	8.76891	9.98432
AT1G16690	Enhancer of polycomb-like transcription factor protein	2.23401	2.23309	1.94487	2.13733
AT1G16700	Alpha-helical ferredoxin	12.2499	11.3448	10.3648	11.3198
AT1G16710	HISTONE ACETYLTRANSFERASE OF THE CBP FAMILY 12 (HAC12)	11.0035	10.5234	9.65948	10.3954
AT1G16720	HIGH CHLOROPHYLL FLUORESCENCE PHENOTYPE 173 (HCF173)	3.73826	2.98185	3.66837	3.46283
AT1G16740	Ribosomal protein L20	16.1032	15.6236	17.7683	16.4984
AT1G16790	ribosomal protein-like protein	7.2733	6.91481	9.28061	7.82291
AT1G16800	P-loop containing nucleoside triphosphate hydrolases superfamily protein	3.28403	3.44158	3.38933	3.37165
AT1G16810	7-dehydrocholesterol reductase-like protein	36.1147	42.0711	36.9965	38.3941
AT1G16820	vacuolar ATP synthase catalytic subunit-related / V-ATPase-related / vacuolar proton pump-like protein	1.39456	1.4591	1.41371	1.42246
AT1G16825	Reticulon family protein	1.65217	1.90232	1.86962	1.80804
AT1G16830	Pentatricopeptide repeat (PPR) superfamily protein	2.81026	2.29651	2.04146	2.38274
AT1G16840	hypothetical protein	37.5729	41.4138	54.1879	44.3915
AT1G16850	transmembrane protein	5.89073	4.98873	5.57476	5.48474
AT1G16870	mitochondrial 28S ribosomal protein S29-like protein	11.7265	11.2688	12.3812	11.7922
AT1G16880	ACT DOMAIN REPEATS 11 (ACR11)	5.63659	5.23113	3.96292	4.94355
AT1G16890	UBIQUITIN-CONJUGATING ENZYME 36 (UBC36)	42.336	43.2612	44.1602	43.2525
AT1G16900	EMS-MUTAGENIZED BRI1 SUPPRESSOR 3 (EBS3)	9.21735	9.60976	9.33287	9.38666
AT1G16916	transmembrane protein	8.67116	8.98784	8.59214	8.75038
AT1G16920	RAB GTPASE HOMOLOG A1B (RABA1b)	18.4329	19.9826	16.7282	18.3812
AT1G16930	F-box/RNI-like/FBD-like domains-containing protein	2.12226	2.00558	1.06705	1.73163
AT1G16950	transmembrane protein	3.58344	2.32619	2.10957	2.67307
AT1G16970	KU70 HOMOLOG (KU70)	4.71096	4.32083	4.37995	4.47058
AT1G17020	SENESCENCE-RELATED GENE 1 (SRG1)	22.2637	15.9193	29.6075	22.5968
AT1G17030	hypothetical protein	3.01171	1.0913	1.87517	1.99273
AT1G17040	SH2 DOMAIN PROTEIN A (SHA)	2.52362	2.60771	1.62008	2.25047
AT1G17050	SOLANESYL DIPHOSPHATE SYNTHASE 2 (SPS2)	13.4335	13.5369	11.9347	12.9684
AT1G17060	CYTOCHROME P450 72C1 (CYP72C1)	44.3397	30.0427	48.7053	41.0293
AT1G17070	GC-rich sequence DNA-binding factor-like protein with Tuftelin interacting domain-containing protein	11.6744	10.6487	11.5233	11.2821
AT1G17080	Ribosomal protein L18ae family	28.1125	27.3334	29.5067	28.3175
AT1G17090	transmembrane protein	1.87927	1.46137	1.72734	1.68933
AT1G17100	SOUL heme-binding family protein	1.54816	1.84879	1.73729	1.71141
AT1G17110	UBIQUITIN-SPECIFIC PROTEASE 15 (UBP15)	12.7328	13.3937	12.4443	12.8569
AT1G17120	CATIONIC AMINO ACID TRANSPORTER 8 (CAT8)	17.3792	16.4456	13.7851	15.8699
AT1G17130	coiled-coil protein (DUF572)	11.8423	10.9129	14.9865	12.5806
AT1G17140	INTERACTOR OF CONSTITUTIVE ACTIVE ROPS 1 (ICR1)	23.0513	23.659	14.8975	20.5359
AT1G17145	RING/U-box superfamily protein	8.36729	10.7422	9.34524	9.48491
AT1G17147	VQ motif-containing protein	0.888357	1.27903	1.93711	1.36817
AT1G17160	RBSK; RIBOKINASE	11.4758	9.67626	9.41466	10.1889
AT1G17170	GLUTATHIONE S-TRANSFERASE TAU 24 (GSTU24)	45.3743	44.8714	88.4359	59.5605
AT1G17180	GLUTATHIONE S-TRANSFERASE TAU 25 (GSTU25)	7.5211	5.20071	10.153	7.62492
AT1G17190	GLUTATHIONE S-TRANSFERASE TAU 26 (GSTU26)	6.78394	6.31102	5.57554	6.2235
AT1G17200	CASP-LIKE PROTEIN 2A1; CASPL2A1	8.26579	7.75388	7.69997	7.90655
AT1G17210	IAP-LIKE PROTEIN 1 (ILP1)	36.6807	44.722	45.016	42.1396
AT1G17220	FU-GAERI1 (FUG1)	2.72226	4.0335	2.07786	2.94454
AT1G17270	O-fucosyltransferase family protein	2.15801	2.03866	1.91831	2.03833
AT1G17280	UBIQUITIN-CONJUGATING ENZYME 34 (UBC34)	10.0615	10.4499	10.8076	10.4397
AT1G17290	ALANINE AMINOTRANSFERAS (AlaAT1)	105.264	97.0731	163.935	122.091
AT1G17310	MADS-box transcription factor family protein	2.71463	0.936366	1.96442	1.8718
AT1G17330	Metal-dependent phosphohydrolase	7.60153	6.74674	7.32773	7.22533
AT1G17340	SAC5; SUPPRESSOR OF ACTIN 5	1.15996	0.902464	1.35894	1.14046
AT1G17350	NADH:ubiquinone oxidoreductase intermediate-associated protein 30	4.10471	3.92703	3.4926	3.84145
AT1G17360	LOW protein: protein phosphatase 1 regulatory subunit-like protein	7.63383	8.15483	6.2563	7.34832
AT1G17370	OLIGOURIDYLATE BINDING PROTEIN 1B (UBP1B)	28.6472	28.2182	25.514	27.4598
AT1G17380	JASMONATE-ZIM-DOMAIN PROTEIN 5 (JAZ5)	6.56955	5.13519	4.63412	5.44629
AT1G17410	Nucleoside diphosphate kinase family protein	4.97085	5.82517	4.19846	4.99816
AT1G17440	ENHANCED ETHYLENE RESPONSE 4 (EER4)	18.98	17.6473	16.8087	17.812
AT1G17450	B-block binding subunit of TFIIIC	3.14835	3.11082	2.606	2.95506
AT1G17455	ELF4-LIKE 4 (ELF4-L4)	4.95462	6.0768	5.01945	5.35029
AT1G17460	TRF-LIKE 3 (TRFL3)	5.08862	5.95128	4.79117	5.27702
AT1G17470	DEVELOPMENTALLY REGULATED G-PROTEIN 1 (DRG1)	17.9409	20.2861	18.2739	18.8336
AT1G17480	IQ-DOMAIN 7 (IQD7)	8.57172	5.99309	4.74244	6.43575
AT1G17490	epidermal patterning factor-like protein	18.4269	15.4054	15.2944	16.3756
AT1G17500	ATPase E1-E2 type family protein / haloacid dehalogenase-like hydrolase family protein	24.0267	19.0956	22.3686	21.8303
AT1G17510	hypothetical protein	11.0752	11.9621	14.6745	12.5706
AT1G17520	Homeodomain-like/winged-helix DNA-binding family protein	7.40918	8.70542	8.37947	8.16469
AT1G17530	TRANSLOCASE OF INNER MITOCHONDRIAL MEMBRANE 23 (TIM23-1)	63.2057	91.903	81.8959	79.0016
AT1G17550	HOMOLOGY TO ABI2 (HAB2)	20.5193	20.0198	19.5707	20.0366
AT1G17560	HUELLENLOS (HLL)	9.47741	7.03383	6.73666	7.7493
AT1G17580	MYOSIN 1 (MYA1)	7.52103	7.4124	7.93108	7.6215
AT1G17590	"NUCLEAR FACTOR Y, SUBUNIT A8" (NF-YA8)	12.326	12.3592	9.86259	11.5159
AT1G17620	Late embryogenesis abundant (LEA) hydroxyproline-rich glycoprotein family	36.6231	27.2123	40.1975	34.6777
AT1G17630	CELL WALL MAINTAINER 1; CWM1	2.07025	1.63427	1.75509	1.81987
AT1G17640	RNA-binding (RRM/RBD/RNP motifs) family protein	2.1312	2.91512	1.98543	2.34391
AT1G17650	GLYOXYLATE REDUCTASE 2 (GLYR2)	2.1002	2.33614	2.0103	2.14888
AT1G17665	CA-responsive protein	2.46058	2.8266	2.93279	2.73999
AT1G17680	tetratricopeptide repeat (TPR)-containing protein	6.07427	6.63601	5.84598	6.18542
AT1G17690	NUCLEOLAR FACTOR 1 (NOF1)	6.76342	6.17487	7.15162	6.69664
AT1G17720	(ATB BETA)	19.8299	19.1088	22.8194	20.586
AT1G17730	VACUOLAR PROTEIN SORTING 46.1 (VPS46.1)	26.9776	23.8751	23.517	24.7899
AT1G17745	3-PHOSPHOGLYCERATE DEHYDROGENASE (PGDH)	40.9946	28.5988	35.6893	35.0942
AT1G17750	PEP1 RECEPTOR 2 (PEPR2)	2.49003	2.05094	1.38893	1.97663
AT1G17760	(CSTF77)	2.15844	2.35353	1.65683	2.05627
AT1G17780	transmembrane protein	9.20027	9.72123	10.0338	9.65176
AT1G17790	DNA-binding bromodomain-containing protein	6.17046	6.16505	5.05583	5.79711
AT1G17820	testis-expressed sequence 2-like protein (DUF2404)	4.66098	4.59137	5.2574	4.83658
AT1G17830	hypothetical protein (DUF789)	3.84838	3.78509	5.55173	4.39507
AT1G17840	ATP-BINDING CASSETTE G11 (ABCG11)	33.7671	20.3259	29.6614	27.9181
AT1G17850	Rhodanese/Cell cycle control phosphatase superfamily protein	2.37739	2.87664	2.00881	2.42095
AT1G17860	Kunitz family trypsin and protease inhibitor protein	32.3975	25.7041	35.4244	31.1753
AT1G17870	ETHYLENE-DEPENDENT GRAVITROPISM-DEFICIENT AND YELLOW-GREEN-LIKE 3 (EGY3)	3.23272	3.11142	3.3928	3.24565
AT1G17880	BASIC TRANSCRIPTION FACTOR 3 (BTF3)	74.4436	74.1479	82.0494	76.8803
AT1G17890	(GER2)	38.3353	28.1856	39.7826	35.4345
AT1G17920	HOMEODOMAIN GLABROUS 12 (HDG12)	1.41301	1.15603	1.50432	1.35779
AT1G17930	MAIN; MAINTENANCE OF MERISTEMS	7.82747	7.7404	7.67443	7.74744
AT1G17940	Endosomal targeting BRO1-like domain-containing protein	1.67974	1.70589	1.00334	1.46299
AT1G17960	Threonyl-tRNA synthetase	4.65106	3.08215	5.50619	4.41313
AT1G17980	POLY(A) POLYMERASE 1 (PAPS1)	8.36323	7.89348	7.10486	7.78719
AT1G17990	FMN-linked oxidoreductases superfamily protein	0.910398	1.33756	1.81446	1.35414
AT1G18020	FMN-linked oxidoreductases superfamily protein	1.05316	1.27917	2.24684	1.52639
AT1G18030	Protein phosphatase 2C family protein	2.98484	3.15939	2.99028	3.04484
AT1G18040	CYCLIN-DEPENDENT KINASE D1;3 (CDKD1;3)	4.05027	3.20027	2.44245	3.23099
AT1G18060	microbial collagenase	0.949936	1.08714	0.985897	1.00766
AT1G18070	Translation elongation factor EF1A/initiation factor IF2gamma family protein	24.3432	23.3775	30.9669	26.2292
AT1G18075	MICRORNA159B (MIR159B)	3.38981	4.97686	3.50839	3.95835
AT1G18080	(ATARCA)	250.533	257.558	271.625	259.905
AT1G18150	(ATMPK8)	7.17501	6.17873	5.94661	6.43345
AT1G18160	Protein kinase superfamily protein	14.3502	14.8142	14.8037	14.656
AT1G18190	GOLGIN CANDIDATE 2 (GC2)	8.99761	8.31904	9.16447	8.82704
AT1G18210	Calcium-binding EF-hand family protein	41.6973	36.2195	42.6589	40.1919
AT1G18250	(ATLP-1)	49.1923	39.3809	27.8134	38.7955
AT1G18260	EMS-MUTAGENIZED BRI1 SUPPRESSOR 5 (EBS5)	21.9735	26.0204	26.9249	24.9729
AT1G18265	zein-binding protein (Protein of unknown function%2C DUF593)	1.06687	3.26652	1.72221	2.01853
AT1G18270	ketose-bisphosphate aldolase class-II family protein	4.90628	9.41761	6.82935	7.05108
AT1G18300	NUDIX HYDROLASE HOMOLOG 4 (NUDT4)	2.37032	3.7333	2.78212	2.96191
AT1G18320	Mitochondrial import inner membrane translocase subunit Tim17/Tim22/Tim23 family protein	3.33092	2.7198	2.72922	2.92665
AT1G18330	EARLY-PHYTOCHROME-RESPONSIVE1 (EPR1)	2.79507	11.453	4.05261	6.10022
AT1G18335	Acyl-CoA N-acyltransferases (NAT) superfamily protein	3.25893	3.43266	3.40767	3.36642
AT1G18340	basal transcription factor complex subunit-like protein	2.96749	3.05299	2.94771	2.9894
AT1G18360	alpha/beta-Hydrolases superfamily protein	3.67299	3.06924	3.46218	3.40147
AT1G18370	HINKEL (HIK)	10.5692	7.25309	6.99669	8.273
AT1G18390	LEAF RUST 10 DISEASE-RESISTANCE LOCUS RECEPTOR- LIKE PROTEIN KINASE-LIKE 1.1; LRK10L1.1	1.23002	0.959486	1.47499	1.2215
AT1G18440	Peptidyl-tRNA hydrolase family protein	3.79471	2.91888	2.80042	3.17133
AT1G18450	ACTIN-RELATED PROTEIN 4 (ARP4)	13.6417	15.2758	13.0873	14.0016
AT1G18460	alpha/beta-Hydrolases superfamily protein	2.93232	5.45975	1.63968	3.34392
AT1G18470	Transmembrane Fragile-X-F-associated protein	6.01682	6.91037	7.03848	6.65522
AT1G18480	SHEWENELLA-LIKE PROTEIN PHOSPHATASE 2 (SLP2)	28.8168	23.8666	31.2912	27.9915
AT1G18485	Pentatricopeptide repeat (PPR) superfamily protein	0.747299	0.88312	1.391	1.00714
AT1G18490	PCO3; PLANT CYSTEINE OXIDASE 3	3.26859	3.63066	2.52937	3.14287
AT1G18500	METHYLTHIOALKYLMALATE SYNTHASE-LIKE 4 (MAML-4)	26.7532	23.2996	24.7382	24.9303
AT1G18540	Ribosomal protein L6 family protein	290.851	263.75	313.494	289.365
AT1G18550	ATP binding microtubule motor family protein	3.02846	2.55423	2.27781	2.62017
AT1G18560	BED zinc finger and hAT dimerization domain-containing protein	2.72965	2.27258	1.91373	2.30532
AT1G18570	MYB DOMAIN PROTEIN 51 (MYB51)	8.30057	8.61237	12.6945	9.86916
AT1G18580	GALACTURONOSYLTRANSFERASE 11 (GAUT11)	10.4749	9.14667	9.87869	9.83341
AT1G18590	SULFOTRANSFERASE 17 (SOT17)	2.84855	3.23907	2.84268	2.97677
AT1G18600	RHOMBOID-LIKE PROTEIN 12 (RBL12)	5.19028	4.36548	4.11608	4.55728
AT1G18610	Galactose oxidase/kelch repeat superfamily protein	4.17871	4.71727	3.82953	4.24184
AT1G18620	TON1 RECRUITING MOTIF 3 (TRM3)	2.49217	2.02449	1.52237	2.01301
AT1G18630	GLYCINE-RICH RNA-BINDING PROTEIN 6 (GR-RBP6)	4.96332	4.20267	4.25481	4.4736
AT1G18640	3-PHOSPHOSERINE PHOSPHATASE (PSP)	9.01411	7.62108	7.14699	7.92739
AT1G18650	PLASMODESMATA CALLOSE-BINDING PROTEIN 3 (PDCB3)	5.57303	4.64104	2.93892	4.38433
AT1G18660	zinc finger (C3HC4-type RING finger) family protein	5.60039	5.27927	4.98255	5.28741
AT1G18670	IMPAIRED IN BABA-INDUCED STERILITY 1 (IBS1)	27.8255	18.2789	21.1333	22.4125
AT1G18680	HNH endonuclease domain-containing protein	2.82513	2.49016	3.1784	2.83123
AT1G18690	XYLOGLUCAN XYLOSYLTRANSFERASE 4 (XXT4)	4.84538	4.51185	3.72655	4.36126
AT1G18700	DNAJ heat shock N-terminal domain-containing protein	6.6967	7.47101	7.38006	7.18259
AT1G18720	ER membrane protein%2C putative (DUF962)	28.8624	28.7853	28.5453	28.731
AT1G18740	ROH1%2C putative (DUF793)	18.2461	21.843	24.0645	21.3845
AT1G18745		11.5871	11.3432	12.9771	11.9691
AT1G18750	AGAMOUS-LIKE 65 (AGL65)	1.0831	1.49338	1.14708	1.24119
AT1G18773	acyl thioesterase-like protein	2.22633	2.55649	1.44208	2.07497
AT1G18800	NAP1-RELATED PROTEIN 2 (NRP2)	21.4349	22.6694	22.2807	22.1283
AT1G18830	Transducin/WD40 repeat-like superfamily protein	0.483235	0.475683	4.7181	1.89234
AT1G18840	IQ-DOMAIN 30 (IQD30)	10.0177	9.24537	8.13756	9.13354
AT1G18850	hypothetical protein	17.781	16.6869	20.128	18.1986
AT1G18860	WRKY DNA-BINDING PROTEIN 61 (WRKY61)	1.1087	0.631678	1.55058	1.09699
AT1G18890	CALCIUM-DEPENDENT PROTEIN KINASE 1 (CDPK1)	13.1897	10.9115	14.2155	12.7722
AT1G18900	Pentatricopeptide repeat (PPR) superfamily protein	8.55886	8.02088	7.91888	8.1662
AT1G18910	zinc ion binding protein	4.20522	4.42768	5.04794	4.56028
AT1G18950	DDT domain superfamily	10.604	10.6299	10.1275	10.4538
AT1G18980	RmlC-like cupins superfamily protein	2.55587	1.90606	3.373	2.61164
AT1G19000	Homeodomain-like superfamily protein	45.0942	54.5102	42.2467	47.2837
AT1G19010	hypothetical protein	2.59662	2.95062	2.61931	2.72218
AT1G19020	CDP-diacylglycerol-glycerol-3-phosphate 3-phosphatidyltransferase	24.8409	32.145	54.7685	37.2515
AT1G19025	DNA repair metallo-beta-lactamase family protein	1.31974	0.996289	2.17898	1.49834
AT1G19050	RESPONSE REGULATOR 7 (ARR7)	13.3749	5.94629	8.4994	9.27351
AT1G19070	F-box family protein	3.48963	3.22129	5.09813	3.93635
AT1G19080	TITAN 10 (TTN10)	3.8839	4.13422	4.0391	4.01907
AT1G19100	DEFECTIVE IN MERISTEM SILENCING 11 (DMS11)	3.31793	3.54818	3.05285	3.30632
AT1G19110	inter-alpha-trypsin inhibitor heavy chain-like protein	11.8466	11.9827	9.55747	11.1289
AT1G19115	DEEPER ROOTING 2; DRO2	11.7905	9.66117	10.3097	10.5871
AT1G19120	Small nuclear ribonucleoprotein family protein	18.8662	17.7025	16.1678	17.5788
AT1G19130	RmlC-like jelly roll fold protein	41.1909	37.9183	42.5094	40.5396
AT1G19140	ubiquinone biosynthesis COQ9-like protein	8.67488	9.69784	9.61718	9.32997
AT1G19170	Pectin lyase-like superfamily protein	6.92286	7.18149	5.23733	6.44723
AT1G19180	JASMONATE-ZIM-DOMAIN PROTEIN 1 (JAZ1)	137.812	105.557	140.023	127.797
AT1G19190	alpha/beta-Hydrolases superfamily protein	4.14052	2.53297	2.70173	3.12507
AT1G19200	cyclin-dependent kinase%2C putative (DUF581)	6.87873	4.47492	8.2106	6.52142
AT1G19220	AUXIN RESPONSE FACTOR 19 (ARF19)	28.8777	20.5735	22.6755	24.0422
AT1G19230	Riboflavin synthase-like superfamily protein	1.51623	1.75719	1.39567	1.55636
AT1G19240	transmembrane protein	5.2819	5.11387	5.53956	5.31178
AT1G19270	DA1 (DA1)	6.78174	5.72	7.52003	6.67392
AT1G19290	Pentatricopeptide repeat (PPR) superfamily protein	6.79578	6.92928	6.3168	6.68062
AT1G19300	PARVUS (PARVUS)	5.64376	5.46377	5.041	5.38284
AT1G19310	RING/U-box superfamily protein	7.22453	7.17018	8.72346	7.70606
AT1G19330	histone deacetylase complex subunit	6.42802	5.0859	2.99264	4.83552
AT1G19340	Methyltransferase MT-A70 family protein	3.09964	2.52807	2.33574	2.65449
AT1G19350	BRI1-EMS-SUPPRESSOR 1 (BES1)	29.0408	31.3463	23.5539	27.9803
AT1G19360	REDUCED RESIDUAL ARABINOSE 3 (RRA3)	35.8595	31.6313	33.0496	33.5135
AT1G19370	membrane protein	16.5387	14.576	13.7985	14.9711
AT1G19380	sugar%2C putative (DUF1195)	34.2661	20.4617	31.506	28.7446
AT1G19394	hypothetical protein	2.67914	2.90222	3.47445	3.0186
AT1G19396	hypothetical protein	1.1881	1.85543	1.85571	1.63308
AT1G19397	transmembrane protein	4.33364	5.68281	5.64678	5.22108
AT1G19400	Erythronate-4-phosphate dehydrogenase family protein	7.46088	12.4541	8.93956	9.61816
AT1G19430	S-adenosyl-L-methionine-dependent methyltransferases superfamily protein	11.1667	11.408	9.0555	10.5434
AT1G19440	3-KETOACYL-COA SYNTHASE 4 (KCS4)	13.7899	11.7339	9.47393	11.6659
AT1G19450	Major facilitator superfamily protein	1.86175	1.58973	1.88612	1.7792
AT1G19480	DNA glycosylase superfamily protein	3.45402	3.53959	2.53915	3.17758
AT1G19485	Transducin/WD40 repeat-like superfamily protein	7.9558	8.13928	8.22635	8.10714
AT1G19490	Basic-leucine zipper (bZIP) transcription factor family protein	3.32272	4.32079	4.38172	4.00841
AT1G19520	NUCLEAR FUSION DEFECTIVE 5 (NFD5)	19.8765	18.275	18.9866	19.046
AT1G19530	DNA polymerase epsilon catalytic subunit A	121.922	178.834	124.689	141.815
AT1G19540	NmrA-like negative transcriptional regulator family protein	4.83403	4.37022	4.04198	4.41541
AT1G19550	DEHYDROASCORBATE REDUCTASE; DHAR	5.75902	7.02722	3.44339	5.40988
AT1G19570	DEHYDROASCORBATE REDUCTASE (DHAR1)	21.4874	27.8794	12.3319	20.5662
AT1G19580	GAMMA CARBONIC ANHYDRASE 1 (GAMMA CA1)	11.246	10.2917	10.9788	10.8388
AT1G19600	pfkB-like carbohydrate kinase family protein	31.6664	35.8187	40.4492	35.9781
AT1G19610	(PDF1.4)	5.48109	34.2102	4.75947	14.8169
AT1G19650	Sec14p-like phosphatidylinositol transfer family protein	4.5497	3.34153	3.40543	3.76555
AT1G19660	ATBBD2; BBD2; BIFUNCTIONAL NUCLEASE IN BASAL DEFENSE RESPONSE 2	10.1025	17.532	12.4541	13.3629
AT1G19680	RING/U-box superfamily protein	19.3645	24.085	22.6809	22.0435
AT1G19690	NAD(P)-binding Rossmann-fold superfamily protein	5.26836	5.78872	3.56182	4.87297
AT1G19700	BEL1-LIKE HOMEODOMAIN 10 (BEL10)	2.65814	2.43655	2.01844	2.37104
AT1G19710	UDP-Glycosyltransferase superfamily protein	12.9776	10.5581	11.3705	11.6354
AT1G19715	Mannose-binding lectin superfamily protein	1.01621	1.35347	1.29921	1.22296
AT1G19720	Pentatricopeptide repeat (PPR-like) superfamily protein	1.46526	1.95888	1.65187	1.692
AT1G19730	(ATTRX4)	9.71084	10.1152	8.33932	9.38846
AT1G19740	ATP-dependent protease La (LON) domain protein	11.9995	13.2528	12.5258	12.5927
AT1G19770	PURINE PERMEASE 14 (PUP14)	53.1596	65.3044	59.4679	59.3107
AT1G19790	SHI-RELATED SEQUENCE 7 (SRS7)	17.7828	15.6302	13.5919	15.6683
AT1G19800	ATP-BINDING CASSETTE I14 (ABCI14)	12.4322	11.6394	12.8702	12.3139
AT1G19835	filament-like protein (DUF869)	9.01638	9.89484	7.79019	8.90047
AT1G19840	SAUR53; SMALL AUXIN UPREGULATED RNA 53	31.3528	26.6951	21.3194	26.4558
AT1G19850	MONOPTEROS (MP)	88.5779	82.145	69.1649	79.9626
AT1G19860	Zinc finger C-x8-C-x5-C-x3-H type family protein	3.75682	3.68091	4.39536	3.94437
AT1G19870	IQ-DOMAIN 32 (iqd32)	30.39	34.7191	30.6794	31.9295
AT1G19880	Regulator of chromosome condensation (RCC1) family protein	18.7939	18.8626	18.9921	18.8829
AT1G19910	(AVA-P2)	90.2854	87.2108	101.141	92.8792
AT1G19920	(APS2)	26.5264	27.3854	25.1071	26.3396
AT1G19950	HVA22-LIKE PROTEIN H (ATHVA22H) (HVA22H)	2.69681	2.11296	2.25513	2.35497
AT1G19960	transcription factor	66.4469	66.315	29.941	54.2343
AT1G19970	ER lumen protein retaining receptor family protein	5.99218	4.98197	5.77261	5.58225
AT1G19980	cytomatrix protein-like protein	4.4591	4.33623	4.66965	4.48833
AT1G19990	nucleolin	8.50969	6.39708	7.51594	7.47424
AT1G20050	HYDRA1 (HYD1)	53.1938	52.4715	40.6413	48.7689
AT1G20060	ATP binding microtubule motor family protein	2.2068	1.60876	1.73946	1.85167
AT1G20090	RHO-RELATED PROTEIN FROM PLANTS 2 (ROP2)	25.0697	23.1176	21.2642	23.1505
AT1G20100	DNA ligase-like protein	57.9113	58.059	63.1506	59.707
AT1G20110	FREE1; FYVE DOMAIN PROTEIN REQUIRED FOR ENDOSOMAL SORTING 1; FYVE-DOMAIN PROTEIN 1; FYVE1	30.0551	26.5662	31.8454	29.4889
AT1G20140	SKP1-LIKE 4 (SK4)	25.7334	21.8848	31.471	26.3631
AT1G20200	EMBRYO DEFECTIVE 2719 (emb2719)	30.9776	28.8812	30.8169	30.2253
AT1G20220	Alba DNA/RNA-binding protein	24.4425	20.8974	25.2535	23.5311
AT1G20225	Thioredoxin superfamily protein	18.2851	16.3714	18.2473	17.6346
AT1G20230	Pentatricopeptide repeat (PPR) superfamily protein	1.73699	1.3599	1.38451	1.4938
AT1G20260	V-ATPASE B SUBUNIT 3 (VAB3)	12.4676	12.1553	11.389	12.004
AT1G20270	2-oxoglutarate (2OG) and Fe(II)-dependent oxygenase superfamily protein	18.9963	16.4277	18.2644	17.8961
AT1G20300	Pentatricopeptide repeat (PPR) superfamily protein	8.76159	7.32611	8.54411	8.2106
AT1G20330	STEROL METHYLTRANSFERASE 2 (SMT2)	105.73	88.9511	84.9088	93.1967
AT1G20340	DNA-DAMAGE-REPAIR/TOLERATION PROTEIN 112 (DRT112)	0.390405	1.99533	1.70119	1.36231
AT1G20350	TRANSLOCASE INNER MEMBRANE SUBUNIT 17-1 (TIM17-1)	1.60266	1.10048	0.764719	1.15595
AT1G20370	Pseudouridine synthase family protein	10.9597	10.3518	10.4975	10.603
AT1G20380	Prolyl oligopeptidase family protein	2.29005	2.91395	2.76814	2.65738
AT1G20410	Pseudouridine synthase family protein	5.92319	5.2869	5.68755	5.63255
AT1G20430	hypothetical protein	42.0509	45.2389	44.0351	43.775
AT1G20440	COLD-REGULATED 47 (COR47)	2.98027	18.0942	8.04338	9.70595
AT1G20450	EARLY RESPONSIVE TO DEHYDRATION 10 (ERD10)	6.54792	12.6699	10.3234	9.84708
AT1G20460	NADH-ubiquinone oxidoreductase chain	4.6637	5.37217	6.7309	5.58892
AT1G20470	SAUR-like auxin-responsive protein family	2.20323	3.05841	1.80524	2.35563
AT1G20480	AMP-dependent synthetase and ligase family protein	2.21763	2.63985	2.00172	2.2864
AT1G20490	AMP-dependent synthetase and ligase family protein	1.03572	1.18531	1.06927	1.09677
AT1G20510	OPC-8:0 COA LIGASE1 (OPCL1)	36.0819	24.9167	33.184	31.3942
AT1G20540	Transducin/WD40 repeat-like superfamily protein	4.55803	4.66781	3.06036	4.0954
AT1G20550	O-fucosyltransferase family protein	2.47662	2.04773	1.96176	2.16204
AT1G20560	ACYL ACTIVATING ENZYME 1 (AAE1)	15.0275	14.4143	13.1666	14.2028
AT1G20575	DOLICHOL PHOSPHATE MANNOSE SYNTHASE 1 (DPMS1)	8.38016	8.57085	10.1239	9.02498
AT1G20580	Small nuclear ribonucleoprotein family protein	27.4116	27.4061	31.58	28.7992
AT1G20590	cyclin	2.60781	1.73472	2.00319	2.11524
AT1G20600	AP2/B3-like transcriptional factor family protein	1.3848	1.37399	1.48338	1.41405
AT1G20610	CYCLIN B2;3 (CYCB2;3)	5.90598	4.81697	4.07578	4.93291
AT1G20620	CATALASE 3 (CAT3)	150.003	443.011	153.953	248.989
AT1G20630	CATALASE 1 (CAT1)	42.8508	41.5099	60.604	48.3216
AT1G20640	NIN-LIKE PROTEIN 4; NLP4	8.564	8.9584	6.1729	7.89843
AT1G20650	ALTERED SEED GERMINATION 5 (ASG5)	3.27774	3.74283	2.42959	3.15006
AT1G20670	DNA-binding bromodomain-containing protein	9.21405	9.34689	11.8034	10.1214
AT1G20693	HIGH MOBILITY GROUP B2 (HMGB2)	87.0077	80.3954	72.7692	80.0574
AT1G20696	HIGH MOBILITY GROUP B3 (HMGB3)	84.7758	74.1558	69.8304	76.254
AT1G20700	WUSCHEL RELATED HOMEOBOX 14 (WOX14)	9.14171	7.02265	7.72444	7.96293
AT1G20720	RAD3-like DNA-binding helicase protein	2.48058	1.76597	1.65152	1.96602
AT1G20730	transport/golgi organization-like protein%2C putative (DUF833)	20.7654	14.8457	16.1441	17.2517
AT1G20740	transport/golgi organization-like protein (DUF833)	1.66647	1.94032	1.31794	1.64158
AT1G20760	Calcium-binding EF hand family protein	15.4005	15.3251	16.2234	15.6497
AT1G20770	coiled-coil protein	12.7588	12.1304	13.5202	12.8031
AT1G20780	SENESCENCE-ASSOCIATED E3 UBIQUITIN LIGASE 1 (SAUL1)	10.8119	8.93743	11.6098	10.4531
AT1G20810	FKBP-like peptidyl-prolyl cis-trans isomerase family protein	3.03996	3.32088	2.54743	2.96942
AT1G20816	outer envelope pore-like protein	2.64549	2.76249	2.09769	2.50189
AT1G20823	ATATL80	5.07302	5.27098	3.04716	4.46372
AT1G20830	MULTIPLE CHLOROPLAST DIVISION SITE 1 (MCD1)	3.86176	4.05362	3.98604	3.96714
AT1G20840	TONOPLAST MONOSACCHARIDE TRANSPORTER1 (TMT1)	2.02937	2.04846	1.60977	1.89587
AT1G20850	XYLEM CYSTEINE PEPTIDASE 2 (XCP2)	1.21406	8.78437	4.63347	4.8773
AT1G20880	RNA-binding (RRM/RBD/RNP motifs) family protein	3.08783	4.05521	2.89434	3.3458
AT1G20890	caveolin-1 protein	3.57048	4.01342	2.3232	3.30236
AT1G20900	ESCAROLA (ESC)	2.45	4.37477	3.0246	3.28312
AT1G20910	ARID/BRIGHT DNA-binding domain-containing protein	3.4086	4.38173	4.31081	4.03371
AT1G20920	P-loop containing nucleoside triphosphate hydrolases superfamily protein	25.6441	30.245	29.9709	28.62
AT1G20930	CYCLIN-DEPENDENT KINASE B2;2 (CDKB2;2)	8.05625	6.10442	4.85714	6.33927
AT1G20950	Phosphofructokinase family protein	19.9845	17.4566	22.0329	19.8247
AT1G20960	EMBRYO DEFECTIVE 1507 (emb1507)	51.2577	47.7139	51.5629	50.1781
AT1G20970	calponin-like domain protein	54.6638	43.7693	54.4464	50.9599
AT1G20980	SQUAMOSA PROMOTER BINDING PROTEIN-LIKE 14 (SPL14)	32.8006	30.5577	34.9155	32.7579
AT1G21000	PLATZ transcription factor family protein	42.7646	69.4406	41.979	51.3947
AT1G21010	poly polymerase	6.71396	6.84217	9.27386	7.61
AT1G21050	MIZU-KUSSEI-like protein (Protein of unknown function%2C DUF617)	3.21199	8.77489	4.75976	5.58221
AT1G21060	Serine/Threonine-kinase%2C putative (Protein of unknown function%2C DUF547)	4.70282	3.10458	3.61977	3.80906
AT1G21065	secondary thiamine-phosphate synthase enzyme	7.82354	9.17583	7.13738	8.04558
AT1G21070	UDP-RHA/UDP-GAL TRANSPORTER 2; URGT2	1.20128	1.00609	0.832165	1.01318
AT1G21080	DNAJ heat shock N-terminal domain-containing protein	12.9431	11.8242	13.1978	12.655
AT1G21090	Cupredoxin superfamily protein	6.91199	8.32351	5.34643	6.86064
AT1G21100	INDOLE GLUCOSINOLATE O-METHYLTRANSFERASE 1 (IGMT1)	3.58976	4.55011	7.36182	5.16723
AT1G21110	INDOLE GLUCOSINOLATE O-METHYLTRANSFERASE 3 (IGMT3)	4.63063	4.56306	5.1986	4.79743
AT1G21120	INDOLE GLUCOSINOLATE O-METHYLTRANSFERASE 2 (IGMT2)	6.25696	6.47591	6.56887	6.43391
AT1G21130	INDOLE GLUCOSINOLATE O-METHYLTRANSFERASE 4 (IGMT4)	20.4931	20.0986	40.4152	27.0023
AT1G21140	Vacuolar iron transporter (VIT) family protein	0.922815	1.66335	2.04152	1.54256
AT1G21150	Mitochondrial transcription termination factor family protein	3.61437	4.50802	3.48436	3.86892
AT1G21160	eukaryotic translation initiation factor 2 (eIF-2) family protein	10.0271	10.9563	13.272	11.4185
AT1G21170	(SEC5B)	6.58505	6.30435	5.64706	6.17882
AT1G21190	LSM3A; SM-LIKE 3A	15.1576	15.3915	14.2548	14.9346
AT1G21200	sequence-specific DNA binding transcription factor	8.65344	8.95727	9.28087	8.96386
AT1G21250	CELL WALL-ASSOCIATED KINASE (WAK1)	1.42735	1.08511	1.37478	1.29575
AT1G21280	Copia-like polyprotein/retrotransposon	9.45449	6.9599	8.291	8.23513
AT1G21310	EXTENSIN 3 (EXT3)	473.729	298.124	286.415	352.756
AT1G21320	nucleic acid/nucleotide binding protein	1.26521	1.35959	1.21829	1.28103
AT1G21350	Thioredoxin superfamily protein	5.01478	5.17872	4.64922	4.94757
AT1G21370	transmembrane protein	12.1142	11.1304	12.7156	11.9867
AT1G21380	Target of Myb protein 1	16.9103	14.4636	15.8078	15.7272
AT1G21390	EMBRYO DEFECTIVE 2170 (emb2170)	10.361	6.96369	7.17015	8.16494
AT1G21400	Thiamin diphosphate-binding fold (THDP-binding) superfamily protein	1.6567	14.3152	5.92221	7.29802
AT1G21410	(SKP2A)	6.8573	9.41841	7.55836	7.94469
AT1G21440	Phosphoenolpyruvate carboxylase family protein	6.84418	6.84184	7.44119	7.0424
AT1G21450	SCARECROW-LIKE 1 (SCL1)	22.49	25.145	24.2651	23.9667
AT1G21460	(SWEET1)	0.340184	6.39548	0.944098	2.55992
AT1G21480	Exostosin family protein	4.84345	5.00872	5.44278	5.09832
AT1G21510	TPRXL	2.1653	1.58839	0.448697	1.40079
AT1G21520	hypothetical protein	54.7073	72.6181	97.7943	75.0399
AT1G21525		13.1146	9.3847	17.0602	13.1865
AT1G21560	hypothetical protein	11.497	10.4634	9.15106	10.3705
AT1G21580	Zinc finger C-x8-C-x5-C-x3-H type family protein	19.2087	20.2018	22.6867	20.6991
AT1G21590	kinase with adenine nucleotide alpha hydrolases-like domain-containing protein	6.65316	6.63774	7.5715	6.95413
AT1G21600	PLASTID TRANSCRIPTIONALLY ACTIVE 6 (PTAC6)	3.95613	5.20889	3.47795	4.21432
AT1G21610	UBINUCLEIN 1; UBN1	8.74922	9.8375	10.0849	9.5572
AT1G21630	Calcium-binding EF hand family protein	21.5035	20.9228	24.2642	22.2301
AT1G21640	NAD KINASE 2 (NADK2)	8.71298	7.80412	8.94076	8.48595
AT1G21650	(SECA2)	1.42644	1.31699	1.32293	1.35545
AT1G21660	Chaperone DnaJ-domain superfamily protein	12.9061	12.4565	12.9369	12.7665
AT1G21680	DPP6 N-terminal domain-like protein	13.8209	35.4847	25.5016	24.9357
AT1G21690	EMBRYO DEFECTIVE 1968 (emb1968)	8.58525	8.45229	7.7292	8.25558
AT1G21695	hydroxyproline-rich glycoprotein family protein	1.38833	1.42415	1.14448	1.31898
AT1G21700	SWITCH/SUCROSE NONFERMENTING 3C (SWI3C)	13.431	12.8848	12.9376	13.0845
AT1G21710	8-OXOGUANINE-DNA GLYCOSYLASE 1 (OGG1)	10.3448	10.9149	9.1239	10.1279
AT1G21720	PROTEASOME BETA SUBUNIT C1 (PBC1)	30.7207	28.5045	33.0194	30.7482
AT1G21730	KIN7.1; KINESIN 7.1	4.079	4.70179	3.98547	4.25542
AT1G21740	DUF630 family protein%2C putative (DUF630 and DUF632)	19.39	19.724	12.4663	17.1934
AT1G21750	PDI-LIKE 1-1 (PDIL1-1)	42.0931	39.7827	50.6438	44.1732
AT1G21760	F-BOX PROTEIN 7 (FBP7)	4.42796	6.31989	3.77841	4.84209
AT1G21770	Acyl-CoA N-acyltransferases (NAT) superfamily protein	1.62568	2.10411	3.0446	2.25813
AT1G21780	BTB/POZ domain-containing protein	11.0615	14.2481	12.0845	12.4647
AT1G21790	TRAM%2C LAG1 and CLN8 (TLC) lipid-sensing domain containing protein	4.90934	4.31433	3.25081	4.15816
AT1G21830	hypothetical protein	9.16967	7.37385	11.0511	9.1982
AT1G21840	UREASE ACCESSORY PROTEIN F (UREF)	9.33711	8.34316	6.97019	8.21682
AT1G21880	LYSM DOMAIN GPI-ANCHORED PROTEIN 1 PRECURSOR (LYM1)	20.032	17.8397	16.3725	18.0814
AT1G21900	P24 SUBFAMILY DELTA 5; P24DELTA5	22.4405	18.1825	21.9746	20.8659
AT1G21910	DEHYDRATION RESPONSE ELEMENT-BINDING PROTEIN 26 (DREB26)	11.2468	9.33526	8.72463	9.76889
AT1G21920	Histone H3 K4-specific methyltransferase SET7/9 family protein	27.0085	55.8257	34.5786	39.1376
AT1G21930	transmembrane protein	5.33398	5.02965	3.09977	4.4878
AT1G21970	LEAFY COTYLEDON 1 (LEC1)	2.67459	1.69558	1.94833	2.10617
AT1G21980	PHOSPHATIDYLINOSITOL-4-PHOSPHATE 5-KINASE 1 (PIP5K1)	73.4786	70.0493	67.8416	70.4565
AT1G21990	F-box/RNI-like/FBD-like domains-containing protein	10.816	16.174	7.30613	11.4321
AT1G22020	SERINE HYDROXYMETHYLTRANSFERASE 6 (SHM6)	11.1861	10.7822	13.069	11.6791
AT1G22030	BPS1-like protein	13.7454	14.9469	12.2677	13.6534
AT1G22040	Galactose oxidase/kelch repeat superfamily protein	7.66573	8.33647	8.59891	8.20037
AT1G22050	MEMBRANE-ANCHORED UBIQUITIN-FOLD PROTEIN 6 PRECURSOR (MUB6)	3.7095	3.63469	3.63907	3.66109
AT1G22060	sporulation-specific protein	12.0887	9.59616	9.7914	10.4921
AT1G22065	hypothetical protein	1.85854	2.28881	1.12556	1.75764
AT1G22070	TGA1A-RELATED GENE 3 (TGA3)	10.8176	12.9753	9.97884	11.2573
AT1G22140	zinc finger CCCH domain protein	20.0863	19.453	19.9466	19.8286
AT1G22160	senescence-associated family protein (DUF581)	4.95952	12.9609	3.84063	7.2537
AT1G22170	Phosphoglycerate mutase family protein	6.67596	6.20531	5.57342	6.15156
AT1G22180	Sec14p-like phosphatidylinositol transfer family protein	13.089	9.57937	14.0921	12.2535
AT1G22190	RAP2.4; RELATED TO AP2 4; WIND2	30.531	37.7063	39.4454	35.8942
AT1G22200	Endoplasmic reticulum vesicle transporter protein	10.9058	11.0084	10.9997	10.9713
AT1G22220	AUXIN UP-REGULATED F-BOX PROTEIN 2 (AUF2)	15.6113	19.5894	16.4193	17.2067
AT1G22230	nucleolar GTP-binding protein	1.30161	1.64759	1.50278	1.48399
AT1G22270	Trm112p-like protein	32.4291	33.086	31.9658	32.4936
AT1G22280	PHYTOCHROME-ASSOCIATED PROTEIN PHOSPHATASE TYPE 2C (PAPP2C)	30.0686	28.3742	38.834	32.4256
AT1G22300	GENERAL REGULATORY FACTOR 10 (GRF10)	101.435	89.6324	96.1468	95.7381
AT1G22310	METHYL-CPG-BINDING DOMAIN 8 (MBD8)	7.07012	8.25695	7.36756	7.56488
AT1G22360	UDP-GLUCOSYL TRANSFERASE 85A2 (UGT85A2)	85.2794	46.2092	110.264	80.5843
AT1G22400	(UGT85A1)	9.54575	8.54772	14.3438	10.8124
AT1G22403		4.14442	4.9427	4.57536	4.55416
AT1G22410	Class-II DAHP synthetase family protein	163.157	79.3632	145.829	129.45
AT1G22440	Zinc-binding alcohol dehydrogenase family protein	22.2614	15.5768	17.8566	18.5649
AT1G22450	CYTOCHROME C OXIDASE 6B (COX6B)	31.5006	30.0272	34.775	32.1009
AT1G22470	hypothetical protein	1.94657	2.3338	2.73419	2.33819
AT1G22510	E3 ubiquitin-protein ligase RNF170-like protein (DUF 1232)	5.95343	4.93327	5.94065	5.60912
AT1G22520	MICOS complex subunit Mic10-like protein (DUF543)	7.74225	6.37513	7.20832	7.10857
AT1G22530	PATELLIN 2 (PATL2)	27.5543	26.4795	28.2315	27.4218
AT1G22540	NPF5.10	4.53082	3.74024	3.42288	3.89798
AT1G22550	Major facilitator superfamily protein	4.35064	1.89751	3.73234	3.32683
AT1G22570	Major facilitator superfamily protein	6.47045	5.00711	7.61849	6.36535
AT1G22610	C2 calcium/lipid-binding plant phosphoribosyltransferase family protein	24.7525	21.7897	23.6202	23.3875
AT1G22620	SUPPRESSOR OF ACTIN 1 (ATSAC1)	5.84144	6.34906	6.38209	6.19087
AT1G22640	MYB DOMAIN PROTEIN 3 (MYB3)	14.2661	13.9991	13.1378	13.801
AT1G22650	ALKALINE/NEUTRAL INVERTASE D (A/N-InvD)	2.59372	2.01891	1.10166	1.90477
AT1G22660	Polynucleotide adenylyltransferase family protein	3.85588	3.84084	3.85549	3.85074
AT1G22700	Tetratricopeptide repeat (TPR)-like superfamily protein	5.46976	7.46617	6.21668	6.3842
AT1G22730	MA3 domain-containing protein	13.4414	13.0247	13.7196	13.3952
AT1G22750	transmembrane protein	0.921344	1.21028	1.07329	1.06831
AT1G22770	GIGANTEA (GI)	15.3152	20.0055	15.5487	16.9565
AT1G22780	POINTED FIRST LEAVES (PFL)	97.3769	100.008	100.942	99.4424
AT1G22790	Low affinity potassium transport system protein	9.11932	11.2573	9.97033	10.1157
AT1G22800	S-adenosyl-L-methionine-dependent methyltransferases superfamily protein	8.64877	8.693	7.73451	8.35876
AT1G22830	Tetratricopeptide repeat (TPR)-like superfamily protein	3.0497	3.17733	2.79294	3.00666
AT1G22840	CYTOCHROME C-1 (CYTC-1)	70.6715	62.229	82.9791	71.9599
AT1G22850	SNARE associated Golgi protein family	5.21192	5.72276	5.06831	5.33433
AT1G22860	Vacuolar sorting protein 39	5.56011	5.63852	5.3453	5.51464
AT1G22870	kinase family with ARM repeat domain-containing protein	5.46446	5.72341	5.80835	5.66541
AT1G22880	CELLULASE 5 (CEL5)	12.1361	14.2802	11.2491	12.5551
AT1G22882	ATSUN3; SUN-DOMAIN PROTEIN 3; SUN3	12.7346	9.61919	16.0379	12.7972
AT1G22885	transmembrane protein	6.15814	3.98621	4.02318	4.72251
AT1G22890	transmembrane protein	1.83327	2.03165	3.85033	2.57175
AT1G22910	RNA-binding (RRM/RBD/RNP motifs) family protein	3.94838	3.92525	3.92651	3.93338
AT1G22920	COP9 SIGNALOSOME 5A (CSN5A)	15.4496	14.6435	17.1304	15.7412
AT1G22930	T-complex protein 11	44.3579	53.7601	65.1973	54.4384
AT1G22940	THIAMINE REQUIRING 1 (TH1)	4.74671	5.18536	4.945	4.95902
AT1G22950	2-oxoglutarate (2OG) and Fe(II)-dependent oxygenase superfamily protein	11.3718	11.2543	11.1437	11.2566
AT1G22960	Pentatricopeptide repeat (PPR) superfamily protein	7.60765	6.4902	9.06649	7.72145
AT1G22970	cyclin-D1-binding protein	14.5362	14.3846	13.29	14.0703
AT1G22980	Grap2/cyclin-D-interacting protein	2.78422	2.93492	2.17078	2.62997
AT1G22985	CYTOKININ RESPONSE FACTOR 7 (CRF7)	13.4753	12.9742	30.7616	19.0704
AT1G22990	HEAVY METAL ASSOCIATED ISOPRENYLATED PLANT PROTEIN 22 (HIPP22)	5.30695	3.34771	5.89379	4.84948
AT1G23000	Heavy metal transport/detoxification superfamily protein	11.7947	12.866	4.81983	9.82685
AT1G23010	LOW PHOSPHATE ROOT1 (LPR1)	11.9399	10.4437	7.14937	9.84433
AT1G23020	FERRIC REDUCTION OXIDASE 3 (FRO3)	6.30897	2.80221	4.57815	4.56311
AT1G23030	PLANT U-BOX PROTEIN 11; PUB11	8.3234	6.14281	8.0916	7.51927
AT1G23040	hydroxyproline-rich glycoprotein family protein	23.1997	14.7929	19.806	19.2662
AT1G23080	PIN-FORMED 7 (PIN7)	132.649	94.163	110.095	112.302
AT1G23100	GroES-like family protein	9.07831	7.60901	9.32229	8.66987
AT1G23120	Polyketide cyclase/dehydrase and lipid transport superfamily protein	26.0763	22.5688	28.204	25.6164
AT1G23140	C2-DOMAIN ABA-RELATED8; CAR8	11.797	10.737	15.0542	12.5294
AT1G23160	Auxin-responsive GH3 family protein	20.6967	11.9971	6.4177	13.0372
AT1G23170	transmembrane protein (Protein of unknown function DUF2359%2C transmembrane)	5.48482	5.04933	5.38031	5.30482
AT1G23180	ARM repeat superfamily protein	4.48299	4.33436	4.17983	4.33239
AT1G23190	PHOSPHOGLUCOMUTASE 3 (PGM3)	15.2002	14.3622	18.172	15.9115
AT1G23220	Dynein light chain type 1 family protein	9.65715	8.519	8.88376	9.01997
AT1G23230	mediator of RNA polymerase II transcription subunit	11.5694	10.4709	9.63858	10.5596
AT1G23260	MMS ZWEI HOMOLOGUE 1 (MMZ1)	20.7524	19.5099	22.1408	20.801
AT1G23280	MAK16 protein-like protein	19.1402	18.3094	22.4125	19.954
AT1G23290	(RPL27AB)	425.629	413.003	444.381	427.671
AT1G23310	GLUTAMATE:GLYOXYLATE AMINOTRANSFERASE (GGT1)	18.0352	19.3652	18.0413	18.4806
AT1G23330	alpha/beta-Hydrolases superfamily protein	5.48033	5.22311	4.00946	4.9043
AT1G23340	carboxyl-terminal proteinase%2C putative (DUF239)	7.62101	11.4582	3.33279	7.47065
AT1G23360	(MENG)	5.30493	5.49513	4.53818	5.11275
AT1G23380	KNOTTED1-LIKE HOMEOBOX GENE 6 (KNAT6)	6.09402	6.92017	7.18169	6.73196
AT1G23390	Kelch repeat-containing F-box family protein	33.4865	37.1778	30.0982	33.5875
AT1G23400	(CAF2)	3.84188	4.53016	4.84408	4.40538
AT1G23410	Ribosomal protein S27a / Ubiquitin family protein	72.5091	64.4614	83.6831	73.5512
AT1G23440	Peptidase C15%2C pyroglutamyl peptidase I-like protein	35.2447	31.8195	46.2395	37.7679
AT1G23450	PPR superfamily protein	2.09062	2.11486	6.2503	3.48526
AT1G23460	Pectin lyase-like superfamily protein	1.83082	3.71597	5.85038	3.79906
AT1G23465	Peptidase S24/S26A/S26B/S26C family protein	1.03232	1.14383	1.06115	1.0791
AT1G23470		1.22466	1.61064	1.50516	1.44682
AT1G23490	ADP-RIBOSYLATION FACTOR 1 (ARF1)	53.9956	49.2082	57.7344	53.646
AT1G23550	SIMILAR TO RCD ONE 2 (SRO2)	1.12883	1.06864	1.55061	1.24936
AT1G23560	OBP32pep%2C putative (DUF220)	2.77879	2.22955	2.32633	2.44489
AT1G23710	hypothetical protein (DUF1645)	10.088	12.3039	16.9417	13.1112
AT1G23720	Proline-rich extensin-like family protein	3.83472	8.99098	2.59323	5.13964
AT1G23730	BETA CARBONIC ANHYDRASE 3 (BCA3)	1.42329	1.07306	1.60745	1.36793
AT1G23750	Nucleic acid-binding%2C OB-fold-like protein	6.47804	6.32718	3.88937	5.56486
AT1G23760	(JP630)	26.4475	12.8653	9.59967	16.3042
AT1G23770	F-box family protein	1.52844	0.960251	1.70422	1.39764
AT1G23780	F-box family protein	26.6107	25.9752	32.3399	28.3086
AT1G23790	dicer-like protein (DUF936)	2.26656	1.52073	1.32419	1.70383
AT1G23800	ALDEHYDE DEHYDROGENASE 2B7 (ALDH2B7)	4.19351	4.12293	5.29095	4.5358
AT1G23820	SPERMIDINE SYNTHASE 1 (SPDS1)	25.0499	24.5784	26.1932	25.2739
AT1G23830	transmembrane protein	5.01146	3.97348	3.63055	4.20517
AT1G23840	transmembrane protein	1.36732	2.14941	1.54832	1.68835
AT1G23850	transmembrane protein	14.4309	13.7087	6.4297	11.5231
AT1G23860	RS-CONTAINING ZINC FINGER PROTEIN 21 (RSZ21)	19.695	25.9462	22.652	22.7644
AT1G23870	TREHALOSE-PHOSPHATASE/SYNTHASE 9 (TPS9)	17.637	35.7961	25.2708	26.2346
AT1G23880	NHL domain-containing protein	1.57919	1.94097	1.65702	1.72572
AT1G23890	NHL domain-containing protein	8.33164	8.68994	8.63843	8.55334
AT1G23900	GAMMA-ADAPTIN 1 (GAMMA-ADAPTIN 1)	10.9487	10.6509	12.9093	11.503
AT1G23950	hypothetical protein (DUF626)	16.4865	15.1561	19.4292	17.0239
AT1G23960	hypothetical protein (DUF626)	26.313	27.2377	29.1581	27.5696
AT1G23970	hypothetical protein (DUF626)	5.66433	4.49489	5.73574	5.29832
AT1G23980	RING/U-box superfamily protein	3.25463	3.51655	3.05888	3.27668
AT1G24040	Acyl-CoA N-acyltransferases (NAT) superfamily protein	3.02826	3.29738	3.21525	3.18029
AT1G24050	RNA-processing%2C Lsm domain-containing protein	34.4367	36.7438	37.531	36.2371
AT1G24095	Putative thiol-disulfide oxidoreductase DCC	7.46304	6.73572	11.8865	8.6951
AT1G24100	UDP-GLUCOSYL TRANSFERASE 74B1 (UGT74B1)	24.8231	19.8243	23.3656	22.671
AT1G24120	ARG1-LIKE 1 (ARL1)	5.98292	5.90998	5.49336	5.79542
AT1G24150	FORMIN HOMOLOGUE 4 (FH4)	5.36767	3.30154	5.58406	4.75109
AT1G24160	triadin	7.73424	7.18187	7.22978	7.38196
AT1G24170	(LGT9)	13.8012	9.67046	13.759	12.4102
AT1G24180	IAA-CONJUGATE-RESISTANT 4 (IAR4)	33.2235	29.7436	41.1831	34.7168
AT1G24190	SIN3-LIKE 3 (SNL3)	13.76	14.6022	16.0927	14.8183
AT1G24240	Ribosomal protein L19 family protein	6.23619	6.24074	5.75707	6.078
AT1G24265	bZIP transcription factor%2C putative (DUF1664)	1.67563	1.9845	1.66831	1.77615
AT1G24267	bZIP transcription factor%2C putative (DUF1664)	11.633	10.6352	15.372	12.5467
AT1G24280	GLUCOSE-6-PHOSPHATE DEHYDROGENASE 3 (G6PD3)	4.76709	3.96	4.81201	4.51303
AT1G24290	AAA-type ATPase family protein	2.17112	2.08843	2.15082	2.13679
AT1G24300	GYF domain-containing protein	12.5784	12.4519	14.0384	13.0229
AT1G24310	NUP54	13.8398	12.0612	13.1399	13.0136
AT1G24320	Six-hairpin glycosidases superfamily protein	1.6781	1.32415	0.306523	1.10292
AT1G24340	EMBRYO DEFECTIVE 2421 (emb2421)	4.11511	4.51973	5.3977	4.67751
AT1G24350	Acid phosphatase/vanadium-dependent haloperoxidase-related protein	8.70079	6.86746	10.6936	8.75396
AT1G24360	NAD(P)-binding Rossmann-fold superfamily protein	32.2222	28.5321	30.9935	30.5826
AT1G24430	HXXXD-type acyl-transferase family protein	1.45623	1.33514	2.06095	1.61744
AT1G24440	RING/U-box superfamily protein	5.86611	9.35283	7.70221	7.64038
AT1G24450	NUCLEAR FUSION DEFECTIVE 2 (NFD2)	14.0093	15.995	10.9226	13.6423
AT1G24460	TGN-LOCALIZED SYP41 INTERACTING PROTEIN (TNO1)	13.2453	11.6092	16.1314	13.6619
AT1G24490	ALBINA 4 (ALB4)	6.91979	6.39882	7.2629	6.8605
AT1G24510	TCP-1/cpn60 chaperonin family protein	65.5997	67.0311	71.4115	68.0141
AT1G24530	Transducin/WD40 repeat-like superfamily protein	7.9876	7.59738	7.07326	7.55275
AT1G24560	paramyosin	17.5646	17.6251	22.4942	19.2279
AT1G24600	hypothetical protein	8.43672	8.79316	9.18404	8.80464
AT1G24610	Rubisco methyltransferase family protein	8.87398	9.64153	9.01902	9.17818
AT1G24625	ZINC FINGER PROTEIN 7 (ZFP7)	10.3171	8.10586	7.94235	8.78844
AT1G24706	(THO2)	7.77162	7.56987	8.94521	8.09557
AT1G24764	MICROTUBULE-ASSOCIATED PROTEINS 70-2 (MAP70-2)	21.9783	21.4833	17.7734	20.4117
AT1G24793	LIPID X C1 (LPXC1)	6.32926	7.76945	6.60557	6.90143
AT1G24800	F-box family protein	24.065	21.7648	22.7879	22.8725
AT1G24807	Glutamine amidotransferase type 1 family protein	1.70609	1.30346	1.79731	1.60228
AT1G24880	LIPID X C2 (LPXC2)	5.95423	7.01856	7.21183	6.72821
AT1G24881	F-box family protein	24.1049	21.6873	23.4023	23.0648
AT1G24909	Glutamine amidotransferase type 1 family protein	1.9786	1.18345	2.17329	1.77844
AT1G24996	hypothetical protein	93.1659	102.935	100.177	98.7594
AT1G25054	LIPID X C3 (LPXC3)	5.77505	6.59106	6.58783	6.31798
AT1G25055	F-box family protein	25.0703	22.621	23.7606	23.8173
AT1G25083	Glutamine amidotransferase type 1 family protein	1.90876	1.39784	2.14148	1.81603
AT1G25097	hypothetical protein	3.4174	3.58012	4.46882	3.82211
AT1G25098		30.9182	32.9377	35.8858	33.2473
AT1G25145	LIPID X C4 (LPXC4)	6.18437	7.82139	6.66301	6.88959
AT1G25150	F-box family protein	25.5298	23.35	24.4951	24.4583
AT1G25155	Glutamine amidotransferase type 1 family protein	1.80723	1.34391	2.14456	1.76523
AT1G25175		55.4596	59.7372	59.8648	58.3539
AT1G25210	LIPID X C5 (LPXC5)	5.67858	7.03576	5.50938	6.07457
AT1G25211	F-box family protein	24.0495	21.8188	23.7871	23.2184
AT1G25220	ANTHRANILATE SYNTHASE BETA SUBUNIT 1 (ASB1)	16.4761	10.7322	18.4697	15.226
AT1G25230	Calcineurin-like metallo-phosphoesterase superfamily protein	0.718765	2.54949	1.31977	1.52934
AT1G25260	Ribosomal protein L10 family protein	46.0057	52.9256	51.9721	50.3011
AT1G25275	thionin-like protein	375.142	304.181	533.085	404.136
AT1G25280	TUBBY LIKE PROTEIN 10 (TLP10)	42.3488	34.0216	36.2743	37.5482
AT1G25290	RHOMBOID-LIKE PROTEIN 10 (RBL10)	2.69989	2.48239	1.99302	2.39177
AT1G25320	Leucine-rich repeat protein kinase family protein	44.7124	44.2739	31.2702	40.0855
AT1G25350	OVULE ABORTION 9 (OVA9)	17.4687	15.4723	17.8697	16.9369
AT1G25360	Pentatricopeptide repeat (PPR) superfamily protein	1.72005	1.38034	1.40934	1.50324
AT1G25370	hypothetical protein (DUF1639)	5.56356	5.05002	7.11015	5.90791
AT1G25375	Metallo-hydrolase/oxidoreductase superfamily protein	5.55211	4.82972	4.45286	4.9449
AT1G25380	NAD+ TRANSPORTER 2 (NDT2)	8.76446	9.44559	9.40326	9.20443
AT1G25390	LEAF RUST 10 DISEASE-RESISTANCE LOCUS RECEPTOR- LIKE PROTEIN KINASE-LIKE 4; LRK10L4	7.09812	6.50141	6.26287	6.6208
AT1G25400	transmembrane protein	4.66073	5.4688	5.87649	5.33534
AT1G25420	IST1-LIKE 2; ISTL2	14.2339	14.1825	14.014	14.1435
AT1G25450	3-KETOACYL-COA SYNTHASE 5 (KCS5)	11.5511	9.94441	15.5534	12.3496
AT1G25460	NAD(P)-binding Rossmann-fold superfamily protein	2.77694	1.95646	1.59272	2.10871
AT1G25480	aluminum activated malate transporter family protein	7.9384	8.04183	6.85669	7.6123
AT1G25490	ROOTS CURL IN NPA (RCN1)	35.0535	34.4843	41.7039	37.0806
AT1G25500	Plasma-membrane choline transporter family protein	5.39354	6.11629	4.24309	5.25098
AT1G25510	Eukaryotic aspartyl protease family protein	44.1694	28.4401	19.7916	30.8004
AT1G25520	Uncharacterized protein family (UPF0016)	4.44046	4.967	4.92262	4.77669
AT1G25530	Transmembrane amino acid transporter family protein	57.3337	53.1155	29.7865	46.7452
AT1G25540	PHYTOCHROME AND FLOWERING TIME 1 (PFT1)	10.674	10.0347	12.022	10.9102
AT1G25550	myb-like transcription factor family protein	28.5866	29.4867	29.7657	29.2797
AT1G25560	TEMPRANILLO 1 (TEM1)	9.48126	7.58502	12.37	9.81208
AT1G25570	Di-glucose binding protein with Leucine-rich repeat domain-containing protein	21.6454	14.3462	15.7318	17.2411
AT1G25580	SUPPRESSOR OF GAMMA RADIATION 1 (SOG1)	10.9649	9.73374	9.0985	9.93239
AT1G25682	CWC16A	9.52542	10.1354	12.4583	10.7064
AT1G25988	coiled-coil protein%2C putative (DUF572)	1.20394	1.35407	1.68379	1.41393
AT1G26090	P-loop containing nucleoside triphosphate hydrolases superfamily protein	2.83248	2.90788	2.5	2.74679
AT1G26100	Cytochrome b561/ferric reductase transmembrane protein family	2.6289	2.70033	1.8009	2.37671
AT1G26110	DECAPPING 5 (DCP5)	69.5889	65.8244	76.7178	70.7104
AT1G26120	ISOPRENYLCYSTEINE METHYLESTERASE-LIKE 1 (ICME-LIKE1)	4.9009	4.08676	3.60877	4.19881
AT1G26130	ATPase E1-E2 type family protein / haloacid dehalogenase-like hydrolase family protein	3.25344	2.87486	2.28274	2.80368
AT1G26150	PROLINE-RICH EXTENSIN-LIKE RECEPTOR KINASE 10 (PERK10)	19.4883	18.8278	12.7502	17.0221
AT1G26160	Metal-dependent phosphohydrolase	5.54163	5.66518	5.6222	5.60967
AT1G26170	ARM repeat superfamily protein	5.18144	5.30697	5.22848	5.23897
AT1G26180	membrane protein	3.50096	3.81528	3.45193	3.58939
AT1G26190	Phosphoribulokinase / Uridine kinase family	9.64103	7.12252	9.07469	8.61275
AT1G26260	CRYPTOCHROME-INTERACTING BASIC-HELIX-LOOP-HELIX 5 (CIB5)	11.6921	6.86139	6.92667	8.49337
AT1G26270	Phosphatidylinositol 3- and 4-kinase family protein	59.0398	74.9692	72.9168	68.9752
AT1G26290	hypothetical protein	1.28565	0.978581	1.72919	1.33114
AT1G26300	BSD domain-containing protein	6.48624	5.43799	7.0091	6.31111
AT1G26330	DNA binding protein	1.79368	1.57627	1.69527	1.68841
AT1G26340	CYTOCHROME B5 ISOFORM A (CB5-A)	14.4682	11.3747	13.8662	13.2363
AT1G26370	RNA helicase family protein	10.0549	8.87903	9.33361	9.42251
AT1G26380	FAD-binding Berberine family protein	5.86098	7.6532	18.2076	10.5739
AT1G26420	FAD-binding Berberine family protein	1.11697	0.876776	2.66346	1.5524
AT1G26440	UREIDE PERMEASE 5 (UPS5)	19.8486	19.0456	17.3591	18.7511
AT1G26450	Carbohydrate-binding X8 domain superfamily protein	1.00135	2.71706	2.93779	2.21873
AT1G26460	Tetratricopeptide repeat (TPR)-like superfamily protein	19.2556	17.7439	20.8262	19.2752
AT1G26470	SNRK2-SUBSTRATE 1; SNS1	18.4725	18.6273	23.5855	20.2284
AT1G26500	Pentatricopeptide repeat (PPR) superfamily protein	1.32257	0.985082	1.32995	1.21253
AT1G26515	F-box and associated interaction domains-containing protein	4.76216	3.40191	5.66767	4.61058
AT1G26520	Cobalamin biosynthesis CobW-like protein	3.88714	3.62071	3.4794	3.66242
AT1G26540	Agenet domain-containing protein	2.80669	1.51097	1.95027	2.08931
AT1G26550	FKBP-like peptidyl-prolyl cis-trans isomerase family protein	35.0901	32.5486	34.3554	33.998
AT1G26580	ELM2 domain protein	66.6549	75.4061	70.4596	70.8402
AT1G26620	T-box transcription factor%2C putative (DUF863)	8.12724	8.35832	11.3298	9.27177
AT1G26630	FUMONISIN B1-RESISTANT12 (FBR12)	328.211	323.901	381.121	344.411
AT1G26640	IPK; ISOPENTENYL PHOSPHATE KINASE	9.43414	9.20741	7.74348	8.79501
AT1G26650	Son of sevenless protein	9.16404	8.04953	6.38651	7.86669
AT1G26660	Prefoldin chaperone subunit family protein	3.86038	3.93154	4.1515	3.98114
AT1G26665	Mediator complex%2C subunit Med10	30.6938	43.5196	26.4408	33.5514
AT1G26670	(VTI1B)	24.6288	23.5355	28.0953	25.4199
AT1G26690	emp24/gp25L/p24 family/GOLD family protein	9.62369	8.30389	8.46458	8.79738
AT1G26720	transmembrane protein	3.44858	1.45207	3.39875	2.76647
AT1G26730	EXS (ERD1/XPR1/SYG1) family protein	31.2755	19.7902	27.2154	26.0937
AT1G26740	Ribosomal L32p protein family	12.7892	11.7143	11.8736	12.1257
AT1G26750	hypothetical protein	13.4366	10.9299	12.759	12.3752
AT1G26760	SET DOMAIN PROTEIN 35 (SDG35)	4.03694	2.78154	2.03698	2.95182
AT1G26770	EXPANSIN A10 (EXPA10)	23.4369	21.333	23.0892	22.6197
AT1G26800	RING/U-box superfamily protein	4.80443	17.4475	6.45375	9.56857
AT1G26810	GALACTOSYLTRANSFERASE1 (GALT1)	1.76046	1.75932	1.42202	1.64727
AT1G26820	RIBONUCLEASE 3 (RNS3)	5.78683	4.81806	5.07148	5.22546
AT1G26830	CULLIN 3 (CUL3)	34.8401	32.528	43.7719	37.0467
AT1G26840	ORIGIN RECOGNITION COMPLEX PROTEIN 6 (ORC6)	1.68561	1.2422	1.75779	1.56187
AT1G26850	S-adenosyl-L-methionine-dependent methyltransferases superfamily protein	56.522	53.8753	56.5928	55.6634
AT1G26880	Ribosomal protein L34e superfamily protein	75.9768	69.3571	75.3781	73.5707
AT1G26900	Pentatricopeptide repeat (PPR) superfamily protein	4.07325	4.2915	3.19115	3.85196
AT1G26910	RIBOSOMAL PROTEIN L10 B (RPL10B)	17.3991	16.4708	19.5557	17.8085
AT1G26920	zinc finger CCHC domain protein	16.1433	15.1085	21.9559	17.7359
AT1G26930	Galactose oxidase/kelch repeat superfamily protein	53.7856	54.628	50.6866	53.0334
AT1G26940	Cyclophilin-like peptidyl-prolyl cis-trans isomerase family protein	5.05159	4.56855	3.59393	4.40469
AT1G26945	KIDARI (KDR)	1.37	2.72199	2.68158	2.25786
AT1G26960	HOMEOBOX PROTEIN 23 (AtHB23)	3.88695	2.13483	2.42169	2.81449
AT1G27000	GRIP/coiled-coil protein%2C putative (DUF1664)	29.2248	25.4512	37.3486	30.6749
AT1G27020	plant/protein	3.81761	8.32866	4.88312	5.67646
AT1G27030	hypothetical protein	6.63841	8.02143	3.54205	6.0673
AT1G27050	homeobox leucine zipper protein	13.5053	12.5855	14.95	13.6803
AT1G27060	Regulator of chromosome condensation (RCC1) family protein	1.97981	1.73382	1.56865	1.76076
AT1G27070	5'-AMP-activated protein kinase-like protein	4.4685	5.48062	4.73345	4.89419
AT1G27090	glycine-rich protein	56.6965	57.8783	63.626	59.4003
AT1G27100	Actin cross-linking protein	8.79617	8.22192	8.75044	8.58951
AT1G27120	Galactosyltransferase family protein	1.72632	1.71311	1.297	1.57881
AT1G27130	GLUTATHIONE S-TRANSFERASE TAU 13 (GSTU13)	41.1026	55.0198	58.6481	51.5902
AT1G27140	GLUTATHIONE S-TRANSFERASE TAU 14 (GSTU14)	1.79636	2.96766	1.30569	2.02324
AT1G27150	Tetratricopeptide repeat (TPR)-like superfamily protein	7.68957	8.44429	8.07993	8.07127
AT1G27170	transmembrane receptors / ATP binding protein	1.10801	1.45537	1.00759	1.19032
AT1G27190	Leucine-rich repeat protein kinase family protein	33.6281	32.5078	34.373	33.503
AT1G27200	glycosyltransferase family protein (DUF23)	10.5642	9.31969	9.29795	9.72727
AT1G27210	ARM repeat superfamily protein	7.30706	6.61995	6.17374	6.70025
AT1G27290	transmembrane protein	32.0791	46.2203	35.3657	37.8884
AT1G27300	transmembrane protein	36.5521	41.1616	37.2853	38.333
AT1G27310	NUCLEAR TRANSPORT FACTOR 2A (NTF2A)	42.2519	47.0122	52.5355	47.2665
AT1G27320	HISTIDINE KINASE 3 (HK3)	22.8268	28.7414	25.1152	25.5611
AT1G27330	Ribosome associated membrane protein RAMP4	34.3996	29.1912	34.3133	32.6347
AT1G27340	LEAF CURLING RESPONSIVENESS (LCR)	19.4761	20.0746	18.9302	19.4936
AT1G27350	Ribosome associated membrane protein RAMP4	30.3475	27.7457	29.989	29.3607
AT1G27360	SQUAMOSA PROMOTER-LIKE 11 (SPL11)	1.91289	1.84583	1.88373	1.88082
AT1G27370	SQUAMOSA PROMOTER BINDING PROTEIN-LIKE 10 (SPL10)	2.23084	2.54002	2.46824	2.41303
AT1G27385	phosphoribosylformylglycinamidine synthase	3.26045	2.93207	3.96376	3.38543
AT1G27390	TRANSLOCASE OUTER MEMBRANE 20-2 (TOM20-2)	28.7003	26.3166	30.2743	28.4304
AT1G27400	Ribosomal protein L22p/L17e family protein	91.8911	87.8066	96.3507	92.0161
AT1G27410	DNA repair metallo-beta-lactamase family protein	5.52771	6.61741	3.93324	5.35945
AT1G27420	Galactose oxidase/kelch repeat superfamily protein	4.67353	5.49299	3.11733	4.42795
AT1G27430	GYF domain-containing protein	12.3932	12.708	14.6624	13.2545
AT1G27435	hypothetical protein	15.3716	14.3615	15.6264	15.1199
AT1G27440	(GUT2)	3.57085	4.556	4.6077	4.24485
AT1G27450	ADENINE PHOSPHORIBOSYL TRANSFERASE 1 (APT1)	44.1414	37.6122	40.7402	40.8313
AT1G27460	NO POLLEN GERMINATION RELATED 1 (NPGR1)	4.41364	3.37001	2.79976	3.5278
AT1G27470	transducin family protein / WD-40 repeat family protein	14.1788	15.56	17.88	15.8729
AT1G27500	Tetratricopeptide repeat (TPR)-like superfamily protein	13.2849	7.32994	9.34309	9.98597
AT1G27510	EXECUTER 2 (EX2)	9.28761	12.8067	10.4411	10.8451
AT1G27520	MANNOSIDASE 5; MNS5	10.8888	12.0864	10.5146	11.1633
AT1G27530	ubiquitin-fold modifier-conjugating enzyme	33.6557	33.1921	38.869	35.2389
AT1G27540	F-box protein (DUF295)	14.854	15.3175	14.5402	14.9039
AT1G27565	hypothetical protein	5.96283	5.11803	6.05403	5.71163
AT1G27580	F-box protein (DUF295)	11.5841	11.2761	10.3479	11.0693
AT1G27590		12.5572	13.448	14.1645	13.3899
AT1G27595	TANG1	8.06272	8.8844	8.12625	8.35779
AT1G27600	IRREGULAR XYLEM 9-LIKE (IRX9-L)	11.7065	11.6844	10.5171	11.3027
AT1G27620	HXXXD-type acyl-transferase family protein	1.8349	1.21974	0.65256	1.23573
AT1G27630	CYCLIN T 1;3 (CYCT1;3)	7.44443	6.85211	7.72444	7.34033
AT1G27650	(ATU2AF35A)	48.8309	61.2297	62.8026	57.621
AT1G27680	ADPGLC-PPASE LARGE SUBUNIT (APL2)	4.62759	4.38034	4.49337	4.50043
AT1G27690	lipase%2C putative (DUF620)	12.5863	14.1769	12.4164	13.0599
AT1G27695	TGD5; TRIGALACTOSYLDIACYLGLYCEROL 5	5.4719	5.2143	5.13428	5.27349
AT1G27700	Syntaxin/t-SNARE family protein	3.46645	3.04219	3.50646	3.33837
AT1G27730	SALT TOLERANCE ZINC FINGER (STZ)	24.0792	41.2133	37.6813	34.3246
AT1G27750	nucleic acid binding protein	13.4435	15.3561	14.668	14.4892
AT1G27752	Ubiquitin system component Cue protein	9.98878	10.8058	11.6	10.7982
AT1G27760	SALT-TOLERANCE 32 (SAT32)	18.6273	18.3219	22.7054	19.8848
AT1G27770	AUTOINHIBITED CA2+-ATPASE 1 (ACA1)	19.0627	16.4092	18.5021	17.9913
AT1G27840	(ATCSA-1)	7.02672	6.93043	6.71366	6.89027
AT1G27850	RUN/FYVE domain protein	9.96734	10.3467	9.14249	9.81883
AT1G27860	hypothetical protein (DUF626)	30.6872	38.0817	35.047	34.6053
AT1G27880	DEAD/DEAH box RNA helicase family protein	1.71511	1.50244	1.69345	1.637
AT1G27900	RNA helicase family protein	5.31885	5.33081	5.96708	5.53891
AT1G27910	PLANT U-BOX 45 (PUB45)	4.12825	2.97786	2.93664	3.34758
AT1G27920	MICROTUBULE-ASSOCIATED PROTEIN 65-8 (MAP65-8)	8.94527	10.1669	6.34762	8.48658
AT1G27921		2.1642	2.71543	1.61625	2.16529
AT1G27930	glucuronoxylan 4-O-methyltransferase-like protein (DUF579)	15.6149	10.2617	11.4813	12.4526
AT1G27950	GLYCOSYLPHOSPHATIDYLINOSITOL-ANCHORED LIPID PROTEIN TRANSFER 1 (LTPG1)	129.479	72.8897	118.111	106.827
AT1G27960	EVOLUTIONARILY CONSERVED C-TERMINAL REGION 9 (ECT9)	4.49833	4.86979	4.2711	4.54641
AT1G27970	NUCLEAR TRANSPORT FACTOR 2B (NTF2B)	34.1757	30.3222	37.7575	34.0852
AT1G27980	DIHYDROSPHINGOSINE PHOSPHATE LYASE (DPL1)	10.1001	9.4743	9.90045	9.82497
AT1G28010	ATP-BINDING CASSETTE B14 (ABCB14)	0.798632	0.912954	1.37769	1.02976
AT1G28050	B-BOX DOMAIN PROTEIN 13; BBX13	9.79689	9.94969	10.951	10.2325
AT1G28060	Pre-mRNA-splicing factor 3	19.4236	19.0059	22.3041	20.2445
AT1G28070	ATP-dependent RNA helicase	3.04384	4.06088	4.37128	3.82533
AT1G28090	Polynucleotide adenylyltransferase family protein	4.58773	4.2526	4.61333	4.48455
AT1G28110	SERINE CARBOXYPEPTIDASE-LIKE 45 (SCPL45)	15.3539	15.7417	11.142	14.0792
AT1G28120	ubiquitin thioesterase otubain-like protein	9.22645	9.26852	8.78471	9.09323
AT1G28130	(GH3.17)	70.496	48.5551	56.4203	58.4905
AT1G28140	integral membrane family protein	6.94773	8.07488	5.8445	6.9557
AT1G28150	hypothetical protein	6.83006	6.92828	5.25711	6.33848
AT1G28190	hypothetical protein	29.866	36.2062	53.0009	39.691
AT1G28200	FH INTERACTING PROTEIN 1 (FIP1)	16.1737	16.0698	20.7048	17.6494
AT1G28210	(ATJ1)	1.12034	1.00221	1.21345	1.112
AT1G28240	strawberry notch protein (DUF616)	8.05335	6.94162	9.29597	8.09698
AT1G28250	transmembrane protein	10.5677	9.89317	10.2804	10.2471
AT1G28260	Telomerase activating protein Est1	28.2809	30.7116	23.4836	27.492
AT1G28280	VQ motif-containing protein	40.5338	36.6906	45.1777	40.8007
AT1G28290	ARABINOGALACTAN PROTEIN 31 (AGP31)	188.498	200.47	284.808	224.592
AT1G28310	Dof-type zinc finger DNA-binding family protein	17.2003	18.0924	11.3795	15.5574
AT1G28320	(DEG15)	11.8171	11.7201	10.9286	11.4886
AT1G28330	DORMANCY-ASSOCIATED PROTEIN-LIKE 1 (DYL1)	69.3497	165.575	59.4561	98.127
AT1G28340	RECEPTOR LIKE PROTEIN 4 (RLP4)	14.4389	11.1738	10.2114	11.9413
AT1G28350	Nucleotidylyl transferase superfamily protein	6.18215	6.30429	6.26455	6.25033
AT1G28360	ERF DOMAIN PROTEIN 12 (ERF12)	8.56552	7.97395	7.33034	7.9566
AT1G28370	ERF DOMAIN PROTEIN 11 (ERF11)	17.3262	12.5272	12.8607	14.2381
AT1G28380	NECROTIC SPOTTED LESIONS 1 (NSL1)	13.3504	10.8586	14.5992	12.9361
AT1G28390	Protein kinase superfamily protein	9.91142	7.38322	5.05958	7.4514
AT1G28395	hypothetical protein	6.18431	5.07891	5.18234	5.48185
AT1G28400	GATA zinc finger protein	176.607	126.598	73.4709	125.558
AT1G28410	myosin heavy chain-like protein	5.81211	5.81011	5.08822	5.57015
AT1G28420	HOMEOBOX-1 (HB-1)	11.1109	10.5471	11.3321	10.9967
AT1G28440	HAESA-LIKE 1 (HSL1)	16.3038	13.2708	11.6199	13.7315
AT1G28480	(GRX480)	20.7956	13.292	25.3207	19.8028
AT1G28490	SYNTAXIN OF PLANTS 61 (SYP61)	8.78319	8.44856	8.33325	8.52167
AT1G28500	hypothetical protein (DUF626)	3.65828	3.58611	3.45199	3.56546
AT1G28510	Optic atrophy 3 protein (OPA3)	5.03251	4.51372	5.12341	4.88988
AT1G28520	VASCULAR PLANT ONE ZINC FINGER PROTEIN (VOZ1)	26.4973	23.7859	29.8028	26.6953
AT1G28530	ANGULATA 10; ANU10	1.65733	1.61355	1.6179	1.62959
AT1G28540	transmembrane protein	5.50507	6.168	5.93007	5.86771
AT1G28560	SHOOT REDIFFERENTIATION DEFECTIVE 2 (SRD2)	1.30107	1.28323	1.48859	1.35763
AT1G28580	GDSL-like Lipase/Acylhydrolase superfamily protein	85.2852	73.209	72.1387	76.8777
AT1G28600	GDSL-like Lipase/Acylhydrolase superfamily protein	6.91277	4.9714	8.93918	6.94112
AT1G28620		6.28199	8.62191	5.08873	6.66421
AT1G28680	HXXXD-type acyl-transferase family protein	7.23712	3.66673	5.53843	5.48076
AT1G28690	Tetratricopeptide repeat (TPR)-like superfamily protein	1.71973	1.63098	1.23947	1.53006
AT1G28710	Nucleotide-diphospho-sugar transferase family protein	2.50478	1.79084	1.58744	1.96102
AT1G28760	INNER NUCLEAR MEMBRANE PROTEIN A; NEMP_A	5.03216	5.49357	6.89726	5.80766
AT1G28815	hypothetical protein	2.06685	2.11897	2.32856	2.17146
AT1G28960	NUDIX HYDROLASE HOMOLOG 15 (NUDX15)	12.3002	13.9515	14.2115	13.4877
AT1G29020	Calcium-binding EF-hand family protein	3.41361	2.55707	2.05959	2.67676
AT1G29030	Apoptosis inhibitory protein 5 (API5)	5.04131	5.51217	5.8897	5.48106
AT1G29040	50S ribosomal protein L34	7.29966	7.24198	6.40023	6.98062
AT1G29050	TRICHOME BIREFRINGENCE-LIKE 38 (TBL38)	2.25574	2.32816	1.88934	2.15775
AT1G29060	Target SNARE coiled-coil domain protein	3.74448	3.47823	4.99074	4.07115
AT1G29070	Ribosomal protein L34	5.11505	6.44948	4.45518	5.3399
AT1G29100	Heavy metal transport/detoxification superfamily protein	3.31225	4.59659	5.17422	4.36102
AT1G29120	UP9	4.73079	4.9377	5.30629	4.99159
AT1G29150	NON-ATPASE SUBUNIT 9 (ATS9)	79.0825	73.8068	86.1411	79.6768
AT1G29160	Dof-type zinc finger DNA-binding family protein	14.7696	12.3534	18.1138	15.0789
AT1G29170	(WAVE2)	4.66224	5.01353	4.19424	4.62334
AT1G29195	phosphatidylinositol 4-phosphate 5-kinase MSS4-like protein	10.4448	7.22825	11.2976	9.65688
AT1G29220	transcriptional regulator family protein	11.3502	12.0694	12.117	11.8455
AT1G29240	transcription initiation factor TFIID subunit%2C putative (DUF688)	4.20754	5.96489	3.69564	4.62269
AT1G29250	Alba DNA/RNA-binding protein	25.5352	23.213	26.1811	24.9764
AT1G29260	PEROXIN 7 (PEX7)	13.2284	16.371	16.4049	15.3348
AT1G29280	WRKY DNA-BINDING PROTEIN 65 (WRKY65)	17.9335	15.8066	15.9658	16.5686
AT1G29290	B-cell lymphoma 6 protein	23.7266	15.9073	28.5226	22.7188
AT1G29300	UNFERTILIZED EMBRYO SAC 1 (UNE1)	27.5074	24.2458	19.5498	23.7677
AT1G29310	SecY protein transport family protein	20.5516	19.5531	26.8412	22.3153
AT1G29320	Transducin/WD40 repeat-like superfamily protein	9.79725	9.4315	12.6349	10.6212
AT1G29330	ENDOPLASMIC RETICULUM RETENTION DEFECTIVE 2 (ERD2)	7.01332	7.61533	6.9968	7.20849
AT1G29340	PLANT U-BOX 17 (PUB17)	21.0004	20.052	25.5832	22.2119
AT1G29350	RNA polymerase II degradation factor-like protein (DUF1296)	26.4789	30.3943	29.4273	28.7668
AT1G29357		7.78088	8.53766	8.55503	8.29119
AT1G29370	RNA polymerase II degradation factor-like protein (DUF1296)	27.0401	30.5646	29.8109	29.1385
AT1G29390	COLD REGULATED 314 THYLAKOID MEMBRANE 2 (COR314-TM2)	3.82968	3.84543	2.86013	3.51175
AT1G29400	MEI2-LIKE PROTEIN 5 (ML5)	27.7597	37.24	30.7953	31.9317
AT1G29410	PHOSPHORIBOSYLANTHRANILATE ISOMERASE 3 (PAI3)	4.79296	5.25108	4.72217	4.92207
AT1G29418	transmembrane protein	40.2117	45.7738	60.9856	48.9904
AT1G29465	transmembrane protein	4.00922	4.88279	7.02501	5.30567
AT1G29470	S-adenosyl-L-methionine-dependent methyltransferases superfamily protein	40.1284	33.5146	35.8209	36.488
AT1G29530	hypothetical protein	2.55842	2.33901	2.26356	2.38699
AT1G29550	Eukaryotic initiation factor 4E protein	4.96943	4.92521	4.3867	4.76044
AT1G29560	Zinc finger C-x8-C-x5-C-x3-H type family protein	1.93176	2.03082	1.55827	1.84029
AT1G29630	5'-3' exonuclease family protein	4.64659	3.56863	4.0028	4.07267
AT1G29640	senescence regulator (Protein of unknown function%2C DUF584)	8.46628	18.7695	16.8892	14.7083
AT1G29660	GDSL-like Lipase/Acylhydrolase superfamily protein	2.10845	0.871625	0.359619	1.11323
AT1G29690	CONSTITUTIVELY ACTIVATED CELL DEATH 1 (CAD1)	8.30145	6.81792	9.6444	8.25459
AT1G29700	Metallo-hydrolase/oxidoreductase superfamily protein	1.99565	2.0254	1.9887	2.00325
AT1G29710	Tetratricopeptide repeat (TPR)-like superfamily protein	4.78711	4.57762	4.56975	4.64482
AT1G29750	RECEPTOR-LIKE KINASE IN FLOWERS 1 (RKF1)	3.68605	2.86373	2.82377	3.12451
AT1G29760	SEIPIN2	11.8148	14.598	17.0023	14.4717
AT1G29770	Haloacid dehalogenase-like hydrolase (HAD) superfamily protein	3.0992	3.51971	3.17697	3.26529
AT1G29780	Haloacid dehalogenase-like hydrolase (HAD) superfamily protein	2.76537	3.14339	2.48017	2.79631
AT1G29785		2.78605	3.22394	2.50921	2.83973
AT1G29790	S-adenosyl-L-methionine-dependent methyltransferases superfamily protein	14.5051	13.1002	12.3306	13.312
AT1G29800	RING/FYVE/PHD-type zinc finger family protein	5.66506	5.33366	6.58934	5.86269
AT1G29810	Transcriptional coactivator/pterin dehydratase	3.69494	4.30649	2.65781	3.55308
AT1G29820	Magnesium transporter CorA-like family protein	5.93185	6.59294	5.71381	6.07953
AT1G29840	alpha/beta-Hydrolases superfamily protein	2.67505	2.14102	1.73373	2.18327
AT1G29850	double-stranded DNA-binding family protein	17.1143	17.1703	18.1422	17.4756
AT1G29880	glycyl-tRNA synthetase / glycine-tRNA ligase	43.6569	37.8016	47.6991	43.0525
AT1G29890	REDUCED WALL ACETYLATION 4 (RWA4)	5.72889	4.58086	4.77341	5.02772
AT1G29900	CARBAMOYL PHOSPHATE SYNTHETASE B (CARB)	47.5619	48.3107	49.4413	48.438
AT1G29920	CHLOROPHYLL A/B-BINDING PROTEIN 2 (CAB2)	0.169308	1.12624	2.21959	1.17171
AT1G29930	CHLOROPHYLL A/B BINDING PROTEIN 1 (CAB1)	1.66876	11.3495	7.79369	6.93732
AT1G29940	NUCLEAR RNA POLYMERASE A2 (NRPA2)	14.866	14.2563	17.275	15.4657
AT1G29950	SACL3	4.23813	3.98133	3.36009	3.85985
AT1G29960	Peptidase S24/S26A/S26B/S26C family protein	3.87605	3.60901	2.71622	3.40042
AT1G29965	Ribosomal protein L18ae/LX family protein	0.92099	1.08695	1.3088	1.10558
AT1G29970	60S RIBOSOMAL PROTEIN L18A-1 (RPL18AA)	9.79787	12.2328	13.4536	11.8281
AT1G29980	choice-of-anchor C domain protein%2C putative (Protein of unknown function%2C DUF642)	49.6539	34.8314	27.2068	37.2307
AT1G29990	PREFOLDIN 6 (PFD6)	17.2753	17.3999	17.6031	17.4261
AT1G30000	ALPHA-MANNOSIDASE 3 (MNS3)	17.5496	16.2391	18.5711	17.4533
AT1G30010	NUCLEAR MATURASE 1 (NMAT1)	3.03047	2.91343	2.72156	2.88849
AT1G30040	GIBBERELLIN 2-OXIDASE (GA2OX2)	12.5885	9.32477	7.60984	9.84104
AT1G30070	SGS domain-containing protein	45.7375	49.2658	51.5495	48.851
AT1G30080	Glycosyl hydrolase superfamily protein	6.13524	10.2998	1.7166	6.05055
AT1G30090	Galactose oxidase/kelch repeat superfamily protein	23.4856	23.6517	25.3182	24.1518
AT1G30100	NINE-CIS-EPOXYCAROTENOID DIOXYGENASE 5 (NCED5)	5.6918	1.32152	1.13739	2.7169
AT1G30110	NUDIX HYDROLASE HOMOLOG 25 (NUDX25)	5.99267	6.0695	6.71158	6.25792
AT1G30120	PYRUVATE DEHYDROGENASE E1 BETA (PDH-E1 BETA)	21.015	19.5561	17.024	19.1984
AT1G30130	DUF1365 family protein	8.26921	10.9367	11.8539	10.3533
AT1G30135	JASMONATE-ZIM-DOMAIN PROTEIN 8 (JAZ8)	2.7284	3.08438	4.14393	3.3189
AT1G30160	hypothetical protein (DUF295)	7.14056	7.89018	5.50254	6.84443
AT1G30200	F-box family protein	16.4324	19.336	17.7219	17.8301
AT1G30210	TEOSINTE BRANCHED 1, CYCLOIDEA, AND PCF FAMILY 24 (TCP24)	3.79693	3.53335	4.0416	3.79063
AT1G30230	EUKARYOTIC ELONGATION FACTOR 1B BETA 1 (EEF-1BB1)	290.523	328.49	314.82	311.278
AT1G30240	proline-%2C glutamic acid/leucine-rich protein	5.10767	4.73734	4.86941	4.90481
AT1G30270	CBL-INTERACTING PROTEIN KINASE 23 (CIPK23)	26.1181	22.823	28.4365	25.7925
AT1G30290	Tetratricopeptide repeat (TPR)-like superfamily protein	4.24229	5.04128	4.18632	4.48996
AT1G30300	Metallo-hydrolase/oxidoreductase superfamily protein	4.81461	4.84126	4.17139	4.60909
AT1G30320	Remorin family protein	12.4334	11.513	10.727	11.5578
AT1G30330	AUXIN RESPONSE FACTOR 6 (ARF6)	17.667	15.1555	16.9538	16.5921
AT1G30360	EARLY-RESPONSIVE TO DEHYDRATION 4 (ERD4)	21.3264	21.0097	15.0695	19.1352
AT1G30370	DAD1-LIKE ACYLHYDROLASE (DLAH)	0.594815	1.26292	1.2569	1.03821
AT1G30400	ATP-BINDING CASSETTE C1 (ABCC1)	14.5983	16.5808	16.8837	16.0209
AT1G30410	ATP-BINDING CASSETTE C12 (ABCC12)	1.24067	1.55471	1.41472	1.40336
AT1G30420	ATP-BINDING CASSETTE C11 (ABCC11)	15.9972	13.4782	19.4192	16.2982
AT1G30440	Phototropic-responsive NPH3 family protein	42.0942	46.2799	29.2479	39.2073
AT1G30450	CATION-CHLORIDE CO-TRANSPORTER 1 (CCC1)	8.15446	8.04515	9.10369	8.43443
AT1G30455	cyclin/Brf1-like TBP-binding domain-containing protein	1.43253	1.24309	1.37369	1.34977
AT1G30460	CLEAVAGE AND POLYADENYLATION SPECIFICITY FACTOR 30 (CPSF30)	6.52121	6.48158	6.91302	6.6386
AT1G30470	SIT4 phosphatase-associated family protein	9.03098	7.90538	9.95686	8.96441
AT1G30475	hypothetical protein	1.86007	2.20368	2.60809	2.22395
AT1G30480	DNA-DAMAGE-REPAIR/TOLERATION PROTEIN 111 (DRT111)	8.77685	8.68763	9.12633	8.8636
AT1G30490	PHAVOLUTA (PHV)	47.6695	48.8582	44.1901	46.906
AT1G30500	"NUCLEAR FACTOR Y, SUBUNIT A7" (NF-YA7)	4.18798	6.01645	5.40892	5.20445
AT1G30510	ROOT FNR 2 (RFNR2)	22.3313	19.8075	21.7347	21.2912
AT1G30540	Actin-like ATPase superfamily protein	2.08284	2.43684	2.33935	2.28634
AT1G30570	HERCULES RECEPTOR KINASE 2 (HERK2)	6.35709	4.83652	4.82223	5.33861
AT1G30580	GTP binding protein	44.7337	43.1333	47.4946	45.1206
AT1G30590	RNA polymerase I specific transcription initiation factor RRN3 protein	13.4053	15.1138	11.029	13.1827
AT1G30600	Subtilase family protein	7.18189	6.94039	5.36288	6.49506
AT1G30610	EMBRYO DEFECTIVE 2279 (emb2279)	2.28969	2.28016	1.90251	2.15745
AT1G30620	MURUS 4 (MUR4)	10.7517	8.17266	11.6363	10.1869
AT1G30630	Coatomer epsilon subunit	45.1893	38.99	50.2129	44.7974
AT1G30640	Protein kinase family protein	4.22392	2.72087	3.62892	3.52457
AT1G30650	WRKY DNA-BINDING PROTEIN 14 (WRKY14)	5.39039	4.70278	6.62501	5.57273
AT1G30660	nucleic acid binding protein	2.12288	1.55242	3.438	2.3711
AT1G30680	toprim domain-containing protein	4.64884	4.45912	5.18575	4.76457
AT1G30690	Sec14p-like phosphatidylinositol transfer family protein	31.121	22.1772	23.4746	25.5909
AT1G30700	FAD-binding Berberine family protein	13.2622	21.1809	35.1142	23.1858
AT1G30720	FAD-binding Berberine family protein	20.7665	20.0002	20.8727	20.5465
[truncated: 14,650 more rows]
