# Supplementary material for: H3K27me3 epigenetic mark crucial for callus cell identity and regeneration capacity
Source: Research Square preprint supplement (doi:10.21203/rs.3.rs-5582331/v1), 2025-01-24
Supplement: Supplementary file 11 [file b79771a41ee4f51bf3ae31b4.docx]

**Supplementary Figures**

**
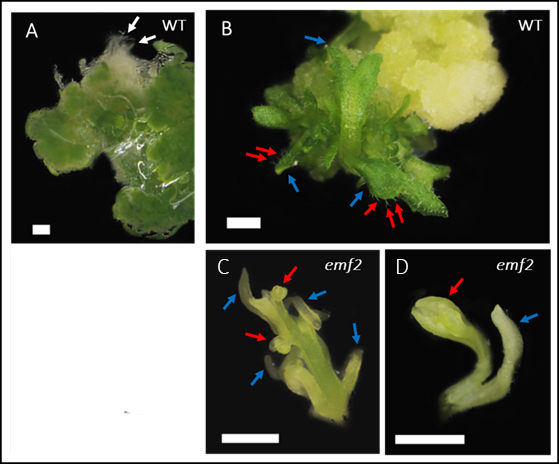
**

**Figure 1**. **Close-up view of WT and *emf2* callus on shoot-inducing media on day 15.** (**A**) WT callus exhibits a deep green color and thin, short roots (white arrows). (**B**) WT callus developed shoot (blue arrows) with true leaves with trichomes (red arrows). (**C**, **D**) *emf2* shoot demonstrating filamentous leaves (blue arrows) and flowers (red arrows). Bar=1mm

**
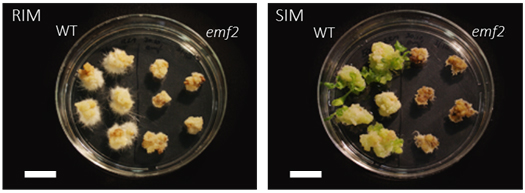
**

**Figure 2. Regenerate test of emf2 calli on root and shoot-inducing media.** Top view on WT and emf2 calli responses to RIM and SIM after 30 days. On RIM, WT calli developed root-like hairs and long roots, and emf2 calli accumulated a dark tone and did not regenerate roots. On SIM, four out of five WT calli developed two to five shoots, emf2 calli became darker and decayed. Bar=2cm.
