# Supplementary material for: H3K27me3 epigenetic mark crucial for callus cell identity and regeneration capacity
Source: Research Square preprint supplement (doi:10.21203/rs.3.rs-5582331/v1), 2025-01-24
Supplement: Supplementary file 15 [file f1f88c1e3af8025fb4290bd4.xlsx]

## Sheet: K4_WT_peaks (1)
Supplementary Data 4: H3K4me3 in WT callus
columns A and B show genes associated with H3K4me3 peaks.
columns C-E show peak location.
column G show peak score. H3K4me3 peaks were selected using cutoff of -log10qvalue > 40 (claculated using MACS2 program)
Gene.ID	gene.name	Chromosome	peak.start	peak.end	-log10qvalue	peak.score
AT1G01010	NAC DOMAIN CONTAINING PROTEIN 1 (NAC001)	Chr1	3507	4957	243.3	2433
AT1G01020	(ARV1)	Chr1	7822	8771	114.3	1143
AT1G01030	NGATHA3 (NGA3)	Chr1	11965	13096	94.4	944
AT1G01040	DICER-LIKE 1 (DCL1)	Chr1	23026	24296	270.2	2702
AT1G01050	PYROPHOSPHORYLASE 1 (PPa1)	Chr1	32308	33261	142.9	1429
AT1G01060	LATE ELONGATED HYPOCOTYL (LHY)	Chr1	36635	37944	192.1	1921
AT1G01080	RNA-binding (RRM/RBD/RNP motifs) family protein	Chr1	45689	46815	100.8	1008
AT1G01090	PYRUVATE DEHYDROGENASE E1 ALPHA (PDH-E1 ALPHA)	Chr1	48145	49319	121	1210
AT1G01100	60S acidic ribosomal protein family	Chr1	50288	51193	86	860
AT1G01120	3-KETOACYL-COA SYNTHASE 1 (KCS1)	Chr1	57552	59088	68.7	687
AT1G01130	CBL-interacting Serine/Threonine-kinase	Chr1	63348	64511	210	2100
AT1G01140	CBL-INTERACTING PROTEIN KINASE 9 (CIPK9)	Chr1	67110	67753	89.5	895
AT1G01160	GRF1-INTERACTING FACTOR 2 (GIF2)	Chr1	72277	73699	175.2	1752
AT1G01180	S-adenosyl-L-methionine-dependent methyltransferases superfamily protein	Chr1	75503	76433	173.2	1732
AT1G01200	RAB GTPASE HOMOLOG A3 (RABA3)	Chr1	86671	87290	122.8	1228
AT1G01210	DNA-directed RNA polymerase%2C subunit M%2C archaeal	Chr1	88862	89725	92.9	929
AT1G01220	L-FUCOKINASE/GDP-L-FUCOSE PYROPHOSPHORYLASE (FKGP)	Chr1	91382	92430	160.4	1604
AT1G01230	ORMDL family protein	Chr1	96018	98255	155.9	1559
AT1G01240	transmembrane protein	Chr1	99899	101037	85.8	858
AT1G01260	BHLH013; BHLH13; JAM2; JASMONATE ASSOCIATED MYC2 LIKE 2	Chr1	108931	110703	229.9	2299
AT1G01290	COFACTOR OF NITRATE REDUCTASE AND XANTHINE DEHYDROGENASE 3 (CNX3)	Chr1	114282	115197	58.4	584
AT1G01300	Eukaryotic aspartyl protease family protein	Chr1	117018	118528	173.9	1739
AT1G01320	REC1; REDUCED CHLOROPLAST COVERAGE	Chr1	127250	128459	287.4	2874
AT1G01340	CYCLIC NUCLEOTIDE GATED CHANNEL 10 (CNGC10)	Chr1	135371	135969	50.5	505
AT1G01350	Zinc finger (CCCH-type/C3HC4-type RING finger) family protein	Chr1	136082	136839	159.8	1598
AT1G01360	REGULATORY COMPONENT OF ABA RECEPTOR 1 (RCAR1)	Chr1	141921	143013	208.3	2083
AT1G01370	(HTR12)	Chr1	143476	144484	149.5	1495
AT1G01390	UDP-Glycosyltransferase superfamily protein	Chr1	149233	149911	146.6	1466
AT1G01420	UDP-GLUCOSYL TRANSFERASE 72B3 (UGT72B3)	Chr1	155235	156095	171.6	1716
AT1G01430	TRICHOME BIREFRINGENCE-LIKE 25 (TBL25)	Chr1	157031	158650	123.6	1236
AT1G01440	hypothetical protein (DUF3133)	Chr1	161760	162746	99.6	996
AT1G01448		Chr1	163307	164609	90.9	909
AT1G01453	late embryogenesis abundant hydroxyproline-rich glycoprotein family protein	Chr1	167313	167920	81.1	811
AT1G01470	LATE EMBRYOGENESIS ABUNDANT 14 (LEA14)	Chr1	171964	172954	150.2	1502
AT1G01480	1-AMINO-CYCLOPROPANE-1-CARBOXYLATE SYNTHASE 2 (ACS2)	Chr1	175791	176843	44.4	444
AT1G01490	Heavy metal transport/detoxification superfamily protein	Chr1	180400	182232	87.3	873
AT1G01500	Erythronate-4-phosphate dehydrogenase family protein	Chr1	185118	186321	119.7	1197
AT1G01510	ANGUSTIFOLIA (AN)	Chr1	187082	188307	203.6	2036
AT1G01540	Protein kinase superfamily protein	Chr1	195683	197130	192.5	1925
AT1G01550	BYPASS 1 (BPS1)	Chr1	199822	201420	77.4	774
AT1G01570	transferring glycosyl group transferase (DUF604)	Chr1	204986	205947	120.4	1204
AT1G01600	"CYTOCHROME P450, FAMILY 86, SUBFAMILY A, POLYPEPTIDE 4" (CYP86A4)	Chr1	220091	221130	256.3	2563
AT1G01610	GLYCEROL-3-PHOSPHATE ACYLTRANSFERASE 4 (GPAT4)	Chr1	223688	224346	74.2	742
AT1G01620	PLASMA MEMBRANE INTRINSIC PROTEIN 1C (PIP1C)	Chr1	225939	227277	173.7	1737
AT1G01630	Sec14p-like phosphatidylinositol transfer family protein	Chr1	228971	229820	110.6	1106
AT1G01640	BTB/POZ domain-containing protein	Chr1	231920	232526	68.6	686
AT1G01650	SIGNAL PEPTIDE PEPTIDASE-LIKE 4 (SPPL4)	Chr1	236655	237846	268.6	2686
AT1G01690	PUTATIVE RECOMBINATION INITIATION DEFECTS 3 (PRD3)	Chr1	249016	250110	260.6	2606
AT1G01710	acyl-CoA thioesterase II	Chr1	262802	263868	133	1330
AT1G01720	(ATAF1)	Chr1	268342	269606	123.1	1231
AT1G01730	hypothetical protein	Chr1	270943	271826	67.8	678
AT1G01740	kinase with tetratricopeptide repeat domain-containing protein	Chr1	273915	274643	53.8	538
AT1G01760	denosine deaminases acting on tRNA	Chr1	277743	279834	118.1	1181
AT1G01770	propionyl-CoA carboxylase	Chr1	277743	279834	173	1730
AT1G01790	K+ EFFLUX ANTIPORTER 1 (KEA1)	Chr1	284439	286677	71.3	713
AT1G01800	NAD(P)-binding Rossmann-fold superfamily protein	Chr1	293353	294579	130.7	1307
AT1G01810	hypothetical protein	Chr1	295205	295803	65.2	652
AT1G01830	ARM repeat superfamily protein	Chr1	298714	299856	100.9	1009
AT1G01840	AP2-like ethylene-responsive transcription factor SNZ	Chr1	303548	304261	98.8	988
AT1G01860	PALEFACE 1 (PFC1)	Chr1	305481	306384	143.1	1431
AT1G01880	5'-3' exonuclease family protein	Chr1	308292	309131	78.4	784
AT1G01900	(SBTI1.1)	Chr1	311873	312660	47.1	471
AT1G01910	ATGET3A; GET3A; GUIDED ENTRY OF TAIL-ANCHORED PROTEIN 3A	Chr1	315169	316990	149.4	1494
AT1G01920	SET domain-containing protein	Chr1	315169	316990	132.4	1324
AT1G01930	zinc finger protein-like protein	Chr1	321700	322863	110.8	1108
AT1G01940	Cyclophilin-like peptidyl-prolyl cis-trans isomerase family protein	Chr1	323009	323829	79.3	793
AT1G01950	ARMADILLO REPEAT KINESIN 2 (ARK2)	Chr1	325320	326292	152.7	1527
AT1G01960	EMBRYO SAC DEVELOPMENT ARREST 10 (EDA10)	Chr1	336263	337889	189.2	1892
AT1G01970	Tetratricopeptide repeat (TPR)-like superfamily protein	Chr1	338281	339012	89.3	893
AT1G01990	hypothetical protein	Chr1	343169	344346	117.9	1179
AT1G02000	UDP-D-GLUCURONATE 4-EPIMERASE 2 (GAE2)	Chr1	345817	347329	134.7	1347
AT1G02020	nitroreductase family protein	Chr1	353049	354968	219.3	2193
AT1G02060	Tetratricopeptide repeat (TPR)-like superfamily protein	Chr1	361672	363227	280.6	2806
AT1G02080	transcription regulator	Chr1	373380	374878	285.1	2851
AT1G02090	FUSCA 5 (FUS5)	Chr1	388496	390722	120.2	1202
AT1G02100	SUPPRESSOR OF BRI1 (SBI1)	Chr1	388496	390722	91.4	914
AT1G02110	bZIP domain class transcription factor (DUF630 and DUF632)	Chr1	392840	394142	77.8	778
AT1G02120	VASCULAR ASSOCIATED DEATH1 (VAD1)	Chr1	395684	396877	145.4	1454
AT1G02130	RAS 5 (RA-5)	Chr1	401110	401933	93.4	934
AT1G02140	MAGO NASHI (MAGO)	Chr1	403552	405504	142.6	1426
AT1G02145	HOMOLOG OF ASPARAGINE-LINKED GLYCOSYLATION 12 (ALG12)	Chr1	403552	405504	67.5	675
AT1G02150	Tetratricopeptide repeat (TPR)-like superfamily protein	Chr1	408706	409732	81.1	811
AT1G02160	Cox19 family protein (CHCH motif)	Chr1	410754	411429	49.4	494
AT1G02170	METACASPASE 1 (MC1)	Chr1	411742	412958	122.8	1228
AT1G02180	ferredoxin-like protein	Chr1	413933	414642	55	550
AT1G02220	NAC DOMAIN CONTAINING PROTEIN 3 (NAC003)	Chr1	428869	430787	266.2	2662
AT1G02230	NAC DOMAIN CONTAINING PROTEIN 4 (NAC004)	Chr1	435894	437017	233.6	2336
AT1G02270	Calcium-binding endonuclease/exonuclease/phosphatase family	Chr1	445120	446350	168.7	1687
AT1G02280	TRANSLOCON AT THE OUTER ENVELOPE MEMBRANE OF CHLOROPLASTS 33 (TOC33)	Chr1	449698	450515	137.7	1377
AT1G02290	hypothetical protein	Chr1	452038	452812	143.6	1436
AT1G02305	ATCATHB2	Chr1	455683	456702	128.4	1284
AT1G02310	ENDO-BETA-MANNANASE 1 (MAN1)	Chr1	460249	460688	41.5	415
AT1G02330	integrator complex subunit-like protein	Chr1	462481	463720	227	2270
AT1G02335	GERMIN-LIKE PROTEIN SUBFAMILY 2 MEMBER 2 PRECURSOR (GL22)	Chr1	463889	464546	49.5	495
AT1G02360	Chitinase family protein	Chr1	472325	473126	68.4	684
AT1G02370	Tetratricopeptide repeat (TPR)-like superfamily protein	Chr1	474396	476217	76.5	765
AT1G02380	transmembrane protein	Chr1	477075	478286	58.4	584
AT1G02390	GLYCEROL-3-PHOSPHATE ACYLTRANSFERASE 2 (GPAT2)	Chr1	480914	481507	46.8	468
AT1G02400	GIBBERELLIN 2-OXIDASE 6 (GA2OX6)	Chr1	486841	487859	146	1460
AT1G02405	proline-rich family protein	Chr1	490046	490525	46.8	468
AT1G02410	cytochrome c oxidase assembly protein CtaG / Cox11 family	Chr1	490902	491876	87.1	871
AT1G02420	Pentatricopeptide repeat (PPR) superfamily protein	Chr1	493477	494433	161.6	1616
AT1G02475	Polyketide cyclase/dehydrase and lipid transport superfamily protein	Chr1	514415	515436	158.2	1582
AT1G02500	S-ADENOSYLMETHIONINE SYNTHETASE 1 (SAM1)	Chr1	518222	519937	139.7	1397
AT1G02520	ATP-BINDING CASSETTE B11 (ABCB11)	Chr1	523602	525416	77.9	779
AT1G02530	ATP-BINDING CASSETTE B12 (ABCB12)	Chr1	529615	530761	116.5	1165
AT1G02560	NUCLEAR ENCODED CLP PROTEASE 5 (CLPP5)	Chr1	537738	538909	278.8	2788
AT1G02610	RING/FYVE/PHD zinc finger superfamily protein	Chr1	555214	556068	122.6	1226
AT1G02640	BETA-XYLOSIDASE 2 (BXL2)	Chr1	566300	567364	46.5	465
AT1G02650	Tetratricopeptide repeat (TPR)-like superfamily protein	Chr1	568580	570128	129	1290
AT1G02660	alpha/beta-Hydrolases superfamily protein	Chr1	573671	574969	190	1900
AT1G02670	P-loop containing nucleoside triphosphate hydrolases superfamily protein	Chr1	576434	577047	45.9	459
AT1G02680	TBP-ASSOCIATED FACTOR 13 (TAF13)	Chr1	580513	581422	128.8	1288
AT1G02690	IMPORTIN ALPHA ISOFORM 6 (IMPA-6)	Chr1	584147	585115	209.8	2098
AT1G02720	GALACTURONOSYLTRANSFERASE 5 (GATL5)	Chr1	591801	593313	256.8	2568
AT1G02730	CELLULOSE SYNTHASE-LIKE D5 (CSLD5)	Chr1	597666	598520	45.9	459
AT1G02740	MORF RELATED GENE 2; MRG2	Chr1	601403	602257	158.3	1583
AT1G02750	Drought-responsive family protein	Chr1	602467	603609	179.6	1796
AT1G02780	EMBRYO DEFECTIVE 2386 (emb2386)	Chr1	608184	609582	250.9	2509
AT1G02810	Plant invertase/pectin methylesterase inhibitor superfamily	Chr1	618284	619438	158.3	1583
AT1G02816	pectinesterase (Protein of unknown function%2C DUF538)	Chr1	621496	622606	161.1	1611
AT1G02840	SERINE/ARGININE-RICH PROTEIN SPLICING FACTOR 34 (SR34)	Chr1	626754	627870	105.2	1052
AT1G02850	BETA GLUCOSIDASE 11 (BGLU11)	Chr1	630418	632247	112	1120
AT1G02860	NITROGEN LIMITATION ADAPTATION (NLA)	Chr1	635333	636886	102.1	1021
AT1G02870	nucleolar-like protein	Chr1	637849	638716	172	1720
AT1G02880	THIAMIN PYROPHOSPHOKINASE1 (TPK1)	Chr1	643150	644660	221.9	2219
AT1G02890	AAA-type ATPase family protein	Chr1	650514	652008	274.8	2748
AT1G02910	LOW PSII ACCUMULATION1 (LPA1)	Chr1	657238	658241	162.3	1623
AT1G02920	GLUTATHIONE S-TRANSFERASE 7 (GSTF7)	Chr1	658803	659776	77.6	776
AT1G02930	GLUTATHIONE S-TRANSFERASE 6 (GSTF6)	Chr1	661206	662271	86	860
AT1G02960	kinetochore protein	Chr1	668933	669901	189.3	1893
AT1G02970	WEE1 KINASE HOMOLOG (WEE1)	Chr1	673272	674070	169.7	1697
AT1G02990	hypothetical protein	Chr1	686567	687462	187.2	1872
AT1G03000	PEROXIN 6 (PEX6)	Chr1	691458	692709	285.9	2859
AT1G03030	P-loop containing nucleoside triphosphate hydrolases superfamily protein	Chr1	701405	702481	173.5	1735
AT1G03040	basic helix-loop-helix (bHLH) DNA-binding superfamily protein	Chr1	705279	706693	207.7	2077
AT1G03060	SPIRRIG (SPI)	Chr1	726150	727397	274.1	2741
AT1G03070	ATLFG4; LFG4; LIFEGUARD 4	Chr1	729903	730563	61.3	613
AT1G03080	NETWORKED 1D (NET1D)	Chr1	736518	738050	120.9	1209
AT1G03090	(MCCA)	Chr1	739567	740899	204.9	2049
AT1G03100	Pentatricopeptide repeat (PPR) superfamily protein	Chr1	745652	746739	134.6	1346
AT1G03110	TRNA MODIFICATION 82 (TRM82)	Chr1	749205	750055	117	1170
AT1G03130	PHOTOSYSTEM I SUBUNIT D-2 (PSAD-2)	Chr1	753664	754186	48.6	486
AT1G03140	splicing factor Prp18 family protein	Chr1	755107	756950	226.1	2261
AT1G03150	Acyl-CoA N-acyltransferases (NAT) superfamily protein	Chr1	755107	756950	70.6	706
AT1G03160	FZO-LIKE (FZL)	Chr1	761115	762599	306.1	3061
AT1G03180	non-structural protein	Chr1	773330	774191	192.2	1922
AT1G03190	ULTRAVIOLET HYPERSENSITIVE 6 (UVH6)	Chr1	775431	776529	232.1	2321
AT1G03200	hypothetical protein	Chr1	780500	781507	110.5	1105
AT1G03220	Eukaryotic aspartyl protease family protein	Chr1	787060	788484	147	1470
AT1G03230	Eukaryotic aspartyl protease family protein	Chr1	790028	791285	127.8	1278
AT1G03250	R3H domain protein	Chr1	794621	795365	69	690
AT1G03260	SNARE associated Golgi protein family	Chr1	797646	798524	159.3	1593
AT1G03270	CBS domain protein with a domain protein (DUF21)	Chr1	799034	799896	133.4	1334
AT1G03280	Transcription factor TFIIE%2C alpha subunit	Chr1	803006	803830	98.3	983
AT1G03290	ELKS/Rab6-interacting/CAST family protein	Chr1	807328	808599	112.2	1122
AT1G03300	DOMAIN OF UNKNOWN FUNCTION 724 1 (ATDUF1)	Chr1	812248	814197	173.9	1739
AT1G03310	DEBRANCHING ENZYME 1 (DBE1)	Chr1	812248	814197	124.3	1243
AT1G03330	LSM2; SM-LIKE 2	Chr1	818609	819486	136.8	1368
AT1G03350	BSD domain-containing protein	Chr1	823014	825356	136.1	1361
AT1G03360	RIBOSOMAL RNA PROCESSING 4 (RRP4)	Chr1	823014	825356	135.5	1355
AT1G03365	RING/U-box superfamily protein	Chr1	826547	827119	50	500
AT1G03370	C2 calcium/lipid-binding and GRAM domain containing protein	Chr1	830606	832051	198.8	1988
AT1G03380	HOMOLOG OF YEAST AUTOPHAGY 18 (ATG18) G (ATG18G)	Chr1	835738	837120	215.1	2151
AT1G03400	2-oxoglutarate (2OG) and Fe(II)-dependent oxygenase superfamily protein	Chr1	843449	844201	91.4	914
AT1G03410	(2A6)	Chr1	846125	848671	195.8	1958
AT1G03430	HISTIDINE-CONTAINING PHOSPHOTRANSFER FACTOR 5 (AHP5)	Chr1	846125	848671	50.8	508
AT1G03440	Leucine-rich repeat (LRR) family protein	Chr1	852389	853940	233	2330
AT1G03445	BRI1 SUPPRESSOR 1 (BSU1)	Chr1	859184	859711	53.7	537
AT1G03457	RNA-binding (RRM/RBD/RNP motifs) family protein	Chr1	863152	864188	115.9	1159
AT1G03470	NETWORKED 3A (NET3A)	Chr1	867086	867764	59.9	599
AT1G03475	LESION INITIATION 2 (LIN2)	Chr1	869949	871273	170.1	1701
AT1G03502		Chr1	874666	875978	61.9	619
AT1G03510	Tetratricopeptide repeat (TPR)-like superfamily protein	Chr1	876879	877618	127.2	1272
AT1G03530	NUCLEAR ASSEMBLY FACTOR 1 (NAF1)	Chr1	882473	884529	139.3	1393
AT1G03540	Pentatricopeptide repeat (PPR-like) superfamily protein	Chr1	882473	884529	118	1180
AT1G03560	Pentatricopeptide repeat (PPR-like) superfamily protein	Chr1	891590	892487	132	1320
AT1G03590	Protein phosphatase 2C family protein	Chr1	895586	897508	42.4	424
AT1G03600	(PSB27)	Chr1	898848	899551	99.7	997
AT1G03610	plant/protein (DUF789)	Chr1	901022	902802	95.6	956
AT1G03650	Acyl-CoA N-acyltransferases (NAT) superfamily protein	Chr1	910422	911353	142.1	1421
AT1G03680	THIOREDOXIN M-TYPE 1 (THM1)	Chr1	917001	919039	254.5	2545
AT1G03687	DTW domain-containing protein	Chr1	917001	919039	185.2	1852
AT1G03710	Cystatin/monellin superfamily protein	Chr1	923379	924082	100	1000
AT1G03730	pyrroline-5-carboxylate reductase	Chr1	930856	931691	228.6	2286
AT1G03740	Protein kinase superfamily protein	Chr1	933616	934818	74.1	741
AT1G03750	SWITCH 2 (SWI2)	Chr1	937810	938802	106.1	1061
AT1G03760	Prefoldin chaperone subunit family protein	Chr1	942505	943497	147.3	1473
AT1G03770	RING 1B (RING1B)	Chr1	944520	945467	242.5	2425
AT1G03790	SOMNUS (SOM)	Chr1	954705	955826	98	980
AT1G03800	ERF DOMAIN PROTEIN 10 (ERF10)	Chr1	957108	958094	259.2	2592
AT1G03830	guanylate-binding family protein	Chr1	965960	966886	240.3	2403
AT1G03840	MAGPIE (MGP)	Chr1	967736	968350	53.7	537
AT1G03850	GLUTAREDOXIN 13 (GRXS13)	Chr1	976083	976637	66.2	662
AT1G03860	PROHIBITIN 2 (PHB2)	Chr1	980980	981952	186.9	1869
AT1G03870	FASCICLIN-LIKE ARABINOOGALACTAN 9 (FLA9)	Chr1	982483	983501	157.5	1575
AT1G03900	ATP-BINDING CASSETTE I18 (ABCI18)	Chr1	991077	992176	198.3	1983
AT1G03905	ATP-BINDING CASSETTE I19 (ABCI19)	Chr1	993367	994269	114.5	1145
AT1G03910	CACTIN; CTN	Chr1	996017	996912	193.7	1937
AT1G03930	DUAL SPECIFICITY KINASE 1 (ADK1)	Chr1	1004741	1005716	180.8	1808
AT1G03960	Calcium-binding EF hand family protein	Chr1	1013706	1014763	113.7	1137
AT1G03970	G-BOX BINDING FACTOR 4 (GBF4)	Chr1	1018078	1019280	177.9	1779
AT1G03980	PHYTOCHELATIN SYNTHASE 2 (PCS2)	Chr1	1018078	1019280	177.9	1779
AT1G03990	Long-chain fatty alcohol dehydrogenase family protein	Chr1	1026581	1029014	113.1	1131
AT1G04000	hypothetical protein	Chr1	1026581	1029014	184.3	1843
AT1G04010	PHOSPHOLIPID STEROL ACYL TRANSFERASE 1 (PSAT1)	Chr1	1035286	1036340	262.8	2628
AT1G04030	eisosome protein	Chr1	1040383	1041279	90.1	901
AT1G04040	HAD superfamily%2C subfamily IIIB acid phosphatase	Chr1	1042270	1043948	148.3	1483
AT1G04050	HOMOLOG OF SU(VAR)3-9 1 (SUVR1)	Chr1	1048787	1049826	129.6	1296
AT1G04070	TRANSLOCASE OF OUTER MEMBRANE 22-I (TOM22-I)	Chr1	1050295	1052216	172.8	1728
AT1G04080	(PRP39)	Chr1	1050295	1052216	130.5	1305
AT1G04090	vacuolar sorting-associated protein (DUF946)	Chr1	1058521	1060622	58.1	581
AT1G04100	INDOLEACETIC ACID-INDUCED PROTEIN 10 (IAA10)	Chr1	1058521	1060622	193.4	1934
AT1G04120	ATP-BINDING CASSETTE C5 (ABCC5)	Chr1	1069294	1070959	195.9	1959
AT1G04130	TETRATRICOPEPTIDE REPEAT 2 (TPR2)	Chr1	1073284	1074387	157.6	1576
AT1G04140	Transducin family protein / WD-40 repeat family protein	Chr1	1079680	1080684	202.5	2025
AT1G04150	C2 calcium/lipid-binding plant phosphoribosyltransferase family protein	Chr1	1081214	1082132	74.5	745
AT1G04160	MYOSIN XI B (XIB)	Chr1	1095481	1096479	140.2	1402
AT1G04170	EUKARYOTIC TRANSLATION INITIATION FACTOR 2 GAMMA SUBUNIT (EIF2 GAMMA)	Chr1	1096944	1097944	199.2	1992
AT1G04190	TETRATRICOPEPTIDE REPEAT 3 (TPR3)	Chr1	1107783	1108757	200.7	2007
AT1G04200	dyggve-melchior-clausen syndrome protein	Chr1	1109377	1110392	196.3	1963
AT1G04210	Leucine-rich repeat protein kinase family protein	Chr1	1114334	1115780	260.2	2602
AT1G04230	rRNA-processing EFG1-like protein (DUF2361)	Chr1	1125387	1126442	259.4	2594
AT1G04250	AUXIN RESISTANT 3 (AXR3)	Chr1	1136207	1137409	85.1	851
AT1G04260	CAMV MOVEMENT PROTEIN INTERACTING PROTEIN 7 (MPI7)	Chr1	1140456	1141445	177.6	1776
AT1G04270	CYTOSOLIC RIBOSOMAL PROTEIN S15 (RPS15)	Chr1	1141900	1143077	151.3	1513
AT1G04280	P-loop containing nucleoside triphosphate hydrolases superfamily protein	Chr1	1145909	1146584	102.3	1023
AT1G04290	Thioesterase superfamily protein	Chr1	1147754	1148465	149.6	1496
AT1G04295		Chr1	1147754	1148465	149.6	1496
AT1G04300	MUSE13; TRAF1B; TUMOR NECROSIS FACTOR RECEPTOR-ASSOCIATED FACTOR 1B	Chr1	1153624	1154690	108	1080
AT1G04310	ETHYLENE RESPONSE SENSOR 2 (ERS2)	Chr1	1155722	1157825	152.2	1522
AT1G04340	HR-like lesion-inducing protein-like protein	Chr1	1164063	1164914	181.3	1813
AT1G04360	ARABIDOPSIS TOXICOS EN LEVADURA 1; ATL1	Chr1	1167788	1168862	139.7	1397
AT1G04390	BTB/POZ domain-containing protein	Chr1	1182764	1183843	194.4	1944
AT1G04400	CRYPTOCHROME 2 (CRY2)	Chr1	1187426	1188333	65.3	653
AT1G04410	CYTOSOLIC-NAD-DEPENDENT MALATE DEHYDROGENASE 1 (c-NAD-MDH1)	Chr1	1190325	1192289	140.7	1407
AT1G04420	NAD(P)-linked oxidoreductase superfamily protein	Chr1	1190325	1192289	142.3	1423
AT1G04430	S-adenosyl-L-methionine-dependent methyltransferases superfamily protein	Chr1	1198098	1199759	92.9	929
AT1G04440	CASEIN KINASE LIKE 13 (CKL13)	Chr1	1202280	1203740	121.5	1215
AT1G04445	C2H2-like zinc finger protein	Chr1	1207344	1207979	65.4	654
AT1G04470	hypothetical protein (DUF810)	Chr1	1211234	1211893	48.3	483
AT1G04480	Ribosomal protein L14p/L23e family protein	Chr1	1215960	1217235	300.1	3001
AT1G04510	MOS4-ASSOCIATED COMPLEX 3A (MAC3A)	Chr1	1226472	1227584	273.3	2733
AT1G04520	PLASMODESMATA-LOCATED PROTEIN 2 (PDLP2)	Chr1	1231690	1232387	100.3	1003
AT1G04530	TETRATRICOPEPTIDE REPEAT 4 (TPR4)	Chr1	1235255	1236101	113.6	1136
AT1G04540	Calcium-dependent lipid-binding (CaLB domain) family protein	Chr1	1237318	1239002	74.6	746
AT1G04550	INDOLE-3-ACETIC ACID INDUCIBLE 12 (IAA12)	Chr1	1240385	1241434	126.5	1265
AT1G04555	transmembrane protein	Chr1	1242593	1243279	101.2	1012
AT1G04570	Major facilitator superfamily protein	Chr1	1247631	1248830	153.2	1532
AT1G04580	ALDEHYDE OXIDASE 4 (AO4)	Chr1	1255513	1257703	100.3	1003
AT1G04590	PPR containing-like protein	Chr1	1260703	1262481	92.1	921
AT1G04610	YUCCA 3 (YUC3)	Chr1	1279461	1280786	51.4	514
AT1G04620	7-HYDROXYMETHYL CHLOROPHYLL A (HMCHL) REDUCTASE (HCAR)	Chr1	1285645	1286623	200	2000
AT1G04630	MATERNAL EFFECT EMBRYO ARREST 4 (MEE4)	Chr1	1290408	1292588	178.3	1783
AT1G04635	EMBRYO DEFECTIVE 1687 (EMB1687)	Chr1	1290408	1292588	209.2	2092
AT1G04650	holliday junction resolvase	Chr1	1298145	1299073	183	1830
AT1G04690	POTASSIUM CHANNEL BETA SUBUNIT 1 (KAB1)	Chr1	1313442	1314904	279.6	2796
AT1G04700	PB1 domain-containing protein tyrosine kinase	Chr1	1316216	1316935	47.6	476
AT1G04710	PEROXISOMAL 3-KETOACYL-COA THIOLASE 4 (PKT4)	Chr1	1321869	1322614	41.8	418
AT1G04730	CHROMOSOME TRANSMISSION FIDELITY 18 (CTF18)	Chr1	1330195	1331247	135.6	1356
AT1G04750	VESICLE-ASSOCIATED MEMBRANE PROTEIN 721 (VAMP721)	Chr1	1332647	1333576	100.8	1008
AT1G04760	VESICLE-ASSOCIATED MEMBRANE PROTEIN 726 (VAMP726)	Chr1	1334630	1335125	44.7	447
AT1G04770	SD!2; SULFUR DEFICIENCY INDUCED 2	Chr1	1336470	1337842	127.6	1276
AT1G04780	Ankyrin repeat family protein	Chr1	1341781	1343687	174.8	1748
AT1G04810	26S proteasome regulatory complex%2C non-ATPase subcomplex%2C Rpn2/Psmd1 subunit	Chr1	1350093	1351113	238.8	2388
AT1G04820	TUBULIN ALPHA-4 CHAIN (TUA4)	Chr1	1356662	1358475	148.4	1484
AT1G04830	Ypt/Rab-GAP domain of gyp1p superfamily protein	Chr1	1361057	1362024	142.3	1423
AT1G04840	Tetratricopeptide repeat (TPR)-like superfamily protein	Chr1	1363990	1365060	143.8	1438
AT1G04850	ubiquitin-associated (UBA)/TS-N domain-containing protein	Chr1	1367999	1368898	187.6	1876
AT1G04860	UBIQUITIN-SPECIFIC PROTEASE 2 (UBP2)	Chr1	1372340	1373112	97	970
AT1G04870	PROTEIN ARGININE METHYLTRANSFERASE 10 (PRMT10)	Chr1	1374702	1375844	210.6	2106
AT1G04900	NADH dehydrogenase ubiquinone complex I%2C assembly factor-like protein (DUF185)	Chr1	1383717	1384670	164.5	1645
AT1G04910	O-fucosyltransferase family protein	Chr1	1390265	1391344	288.2	2882
AT1G04930	hydroxyproline-rich glycoprotein family protein	Chr1	1398092	1399862	201.5	2015
AT1G04940	TRANSLOCON AT THE INNER ENVELOPE MEMBRANE OF CHLOROPLASTS 20-I (Tic20-I)	Chr1	1398092	1399862	60.8	608
AT1G04945	HIT-type Zinc finger family protein	Chr1	1398092	1399862	60.8	608
AT1G04950	TATA BOX ASSOCIATED FACTOR II 59 (TAFII59)	Chr1	1406699	1407610	184.2	1842
AT1G04960	golgin family A protein (DUF1664)	Chr1	1410046	1410814	70	700
AT1G04970	LBR-1	Chr1	1411124	1412175	128.5	1285
AT1G04980	PDI-LIKE 2-2 (PDIL2-2)	Chr1	1415375	1416182	40.5	405
AT1G04985	triacylglycerol lipase-like protein	Chr1	1417646	1418529	132.8	1328
AT1G04990	Zinc finger C-x8-C-x5-C-x3-H type family protein	Chr1	1420717	1421670	102.7	1027
AT1G05000	PLANT AND FUNGI ATYPICAL DUAL-SPECI&#64257;CITY PHOSPHATASE 1 (PFA-DSP1)	Chr1	1425455	1426558	251.2	2512
AT1G05010	ETHYLENE-FORMING ENZYME (EFE)	Chr1	1431376	1432831	184	1840
AT1G05020	ENTH/ANTH/VHS superfamily protein	Chr1	1436403	1437570	213.9	2139
AT1G05030	Major facilitator superfamily protein	Chr1	1440468	1441519	197.3	1973
AT1G05055	GENERAL TRANSCRIPTION FACTOR II H2 (GTF2H2)	Chr1	1450137	1450938	108.1	1081
AT1G05060	coiled-coil protein	Chr1	1451546	1452971	119.8	1198
AT1G05070	transmembrane protein%2C putative (DUF1068)	Chr1	1457869	1458793	183.3	1833
AT1G05090	dentin sialophosphoprotein-like protein	Chr1	1462975	1464075	294.5	2945
AT1G05100	MITOGEN-ACTIVATED PROTEIN KINASE KINASE KINASE 18 (MAPKKK18)	Chr1	1469479	1470682	298.5	2985
AT1G05120	Helicase protein with RING/U-box domain-containing protein	Chr1	1475349	1476301	192.1	1921
AT1G05140	Peptidase M50 family protein	Chr1	1482600	1483884	154.2	1542
AT1G05150	Calcium-binding tetratricopeptide family protein	Chr1	1485686	1486999	156.8	1568
AT1G05160	"CYTOCHROME P450, FAMILY 88, SUBFAMILY A, POLYPEPTIDE 3" (CYP88A3)	Chr1	1490261	1491126	96.8	968
AT1G05170	Galactosyltransferase family protein	Chr1	1493268	1494272	162.3	1623
AT1G05180	AUXIN RESISTANT 1 (AXR1)	Chr1	1500913	1501924	214.7	2147
AT1G05190	EMBRYO DEFECTIVE 2394 (emb2394)	Chr1	1503105	1503829	61.7	617
AT1G05205	hexokinase-1 protein	Chr1	1509420	1511019	111.7	1117
AT1G05210	Transmembrane protein 97%2C Putative	Chr1	1509420	1511019	108.1	1081
AT1G05220	Transmembrane protein 97%2C Putative	Chr1	1511838	1512570	78.2	782
AT1G05270	TraB family protein	Chr1	1533427	1534539	312.8	3128
AT1G05280	ERV-F (C)1 provirus ancestral Env polyprotein%2C putative (DUF604)	Chr1	1536439	1537508	75.4	754
AT1G05300	ZINC TRANSPORTER 5 PRECURSOR (ZIP5)	Chr1	1546965	1547918	261.7	2617
AT1G05320	myosin heavy chain%2C embryonic smooth protein	Chr1	1553532	1554434	76.4	764
AT1G05350	NAD(P)-binding Rossmann-fold superfamily protein	Chr1	1563205	1564247	214.8	2148
AT1G05360	KILLING ME SLOWLY 2 (KMS2)	Chr1	1564448	1565346	187.7	1877
AT1G05370	Sec14p-like phosphatidylinositol transfer family protein	Chr1	1569426	1569961	91.6	916
AT1G05380	Acyl-CoA N-acyltransferase with RING/FYVE/PHD-type zinc finger protein	Chr1	1576747	1578400	279.6	2796
AT1G05400	hypothetical protein	Chr1	1584093	1585273	137.3	1373
AT1G05410	CDPK adapter%2C putative (DUF1423)	Chr1	1586973	1587808	118.9	1189
AT1G05420	OVATE FAMILY PROTEIN 12 (OFP12)	Chr1	1590014	1590776	195.6	1956
AT1G05430	hypothetical protein	Chr1	1594370	1595943	194.2	1942
AT1G05460	SILENCING DEFECTIVE (SDE3)	Chr1	1604026	1605114	213.6	2136
AT1G05470	COTYLEDON VASCULAR PATTERN 2 (CVP2)	Chr1	1609760	1611795	51.9	519
AT1G05490	CHROMATIN REMODELING 31 (chr31)	Chr1	1622401	1623498	117.2	1172
AT1G05500	(NTMC2T2.1)	Chr1	1624702	1625895	211.5	2115
AT1G05520	Sec23/Sec24 protein transport family protein	Chr1	1634422	1635950	294.9	2949
AT1G05560	UDP-GLUCOSYLTRANSFERASE 75B1 (UGT75B1)	Chr1	1645701	1647150	90.5	905
AT1G05562		Chr1	1645701	1647150	90.5	905
AT1G05570	CALLOSE SYNTHASE 1 (CALS1)	Chr1	1658397	1659553	177.8	1778
AT1G05575	transmembrane protein	Chr1	1661590	1662280	115.8	1158
AT1G05590	BETA-HEXOSAMINIDASE 2 (HEXO2)	Chr1	1669395	1670311	72.1	721
AT1G05600	EMBRYO DEFECTIVE 3101 (EMB3101)	Chr1	1671799	1672892	206.4	2064
AT1G05620	URIDINE-RIBOHYDROLASE 2 (URH2)	Chr1	1679082	1680008	118.8	1188
AT1G05630	INOSITOL-POLYPHOSPHATE 5-PHOSPHATASE 13 (5PTASE13)	Chr1	1682137	1683484	260.7	2607
AT1G05670	Pentatricopeptide repeat (PPR-like) superfamily protein	Chr1	1700073	1701175	199.2	1992
AT1G05675	UDP-Glycosyltransferase superfamily protein	Chr1	1701501	1702738	69.1	691
AT1G05690	BTB AND TAZ DOMAIN PROTEIN 3 (bt3)	Chr1	1706900	1707705	58.9	589
AT1G05700	Leucine-rich repeat transmembrane protein kinase protein	Chr1	1712574	1713207	46.3	463
AT1G05710	basic helix-loop-helix (bHLH) DNA-binding superfamily protein	Chr1	1714942	1716613	96.7	967
AT1G05720	selenoprotein family protein	Chr1	1718307	1719593	102	1020
AT1G05730	FAM136A-like protein (DUF842)	Chr1	1718307	1719593	102	1020
AT1G05750	PIGMENT DEFECTIVE 247 (PDE247)	Chr1	1721415	1722446	186.3	1863
AT1G05780	Vacuolar ATPase assembly integral membrane protein VMA21-like domain-containing protein	Chr1	1726591	1727383	52.2	522
AT1G05790	lipase class 3 family protein	Chr1	1732709	1733778	209.1	2091
AT1G05800	DONGLE (DGL)	Chr1	1741198	1742087	40.1	401
AT1G05805	basic helix-loop-helix (bHLH) DNA-binding superfamily protein	Chr1	1744735	1745621	209.9	2099
AT1G05810	RAB GTPASE HOMOLOG A5E (RABA5E)	Chr1	1748311	1749007	77.9	779
AT1G05820	SIGNAL PEPTIDE PEPTIDASE-LIKE 5 (SPPL5)	Chr1	1749610	1750170	65.9	659
AT1G05830	TRITHORAX-LIKE PROTEIN 2 (ATX2)	Chr1	1754138	1755483	327.8	3278
AT1G05840	Eukaryotic aspartyl protease family protein	Chr1	1765305	1766344	163.4	1634
AT1G05860	INO80 complex subunit D-like protein	Chr1	1768958	1769955	106.7	1067
AT1G05870	hypothetical protein (DUF1685)	Chr1	1772152	1773417	158.8	1588
AT1G05890	ARIADNE 5 (ARI5)	Chr1	1779260	1780741	270.2	2702
AT1G05900	ENDONUCLEASE III 2 (NTH2)	Chr1	1786762	1787495	187.2	1872
AT1G05910	cell division cycle protein 48-related / CDC48-like protein	Chr1	1790109	1791048	227.6	2276
AT1G05940	CATIONIC AMINO ACID TRANSPORTER 9 (CAT9)	Chr1	1802767	1804127	258.5	2585
AT1G05950	hypothetical protein	Chr1	1806799	1807666	100.8	1008
AT1G05960	ARM repeat superfamily protein	Chr1	1814657	1815617	223.1	2231
AT1G05970	RNA-binding (RRM/RBD/RNP motifs) family protein	Chr1	1816392	1817317	120.1	1201
AT1G06000	UGT89C1	Chr1	1820452	1821812	157.7	1577
AT1G06002		Chr1	1820452	1821812	157.7	1577
AT1G06010	basic leucine zipper/W2 domain protein	Chr1	1822584	1823265	94	940
AT1G06020	pfkB-like carbohydrate kinase family protein	Chr1	1824489	1824985	59.7	597
AT1G06040	SALT TOLERANCE (STO)	Chr1	1828720	1829884	102.3	1023
AT1G06060	LisH and RanBPM domains containing protein	Chr1	1832914	1833537	59.1	591
AT1G06070	Basic-leucine zipper (bZIP) transcription factor family protein	Chr1	1836660	1837702	224.3	2243
AT1G06110	SKP1/ASK-INTERACTING PROTEIN 16 (SKIP16)	Chr1	1853867	1855328	221.7	2217
AT1G06130	GLYOXALASE 2-4 (GLX2-4)	Chr1	1859566	1860831	124.5	1245
AT1G06140	MITOCHONDRIAL EDITING FACTOR 3 (MEF3)	Chr1	1864710	1865764	194.1	1941
AT1G06148	hypothetical protein	Chr1	1876932	1877499	52.4	524
AT1G06150	EMBRYO DEFECTIVE 1444 (EMB1444)	Chr1	1867759	1868903	104.8	1048
AT1G06160	OCTADECANOID-RESPONSIVE ARABIDOPSIS AP2/ERF 59 (ORA59)	Chr1	1883027	1883866	173.3	1733
AT1G06180	MYB DOMAIN PROTEIN 13 (MYB13)	Chr1	1889321	1890934	149.4	1494
AT1G06190	RHO-N 1 (RHON1)	Chr1	1893224	1894169	83.7	837
AT1G06200	Peptidase S24/S26A/S26B/S26C family protein	Chr1	1896321	1897939	108.1	1081
AT1G06210	ENTH/VHS/GAT family protein	Chr1	1896321	1897939	90.7	907
AT1G06220	MATERNAL EFFECT EMBRYO ARREST 5 (MEE5)	Chr1	1899883	1901048	171.8	1718
AT1G06230	GLOBAL TRANSCRIPTION FACTOR GROUP E4 (GTE4)	Chr1	1907057	1908669	216.1	2161
AT1G06240	diiron containing four-helix bundle family ferritin protein%2C putative (Protein of unknown function DUF455)	Chr1	1911042	1911925	120.2	1202
AT1G06260	Cysteine proteinases superfamily protein	Chr1	1916892	1917750	89.9	899
AT1G06265		Chr1	1916892	1917750	89.9	899
AT1G06270	Pentatricopeptide repeat (PPR) superfamily protein	Chr1	1918516	1919820	123.4	1234
AT1G06290	ACYL-COA OXIDASE 3 (ACX3)	Chr1	1922270	1923261	203.8	2038
AT1G06310	ACYL-COA OXIDASE 6 (ACX6)	Chr1	1926679	1927324	97.3	973
AT1G06380	Ribosomal protein L1p/L10e family	Chr1	1944330	1946041	200.1	2001
AT1G06390	GSK3/SHAGGY-LIKE PROTEIN KINASE 1 (GSK1)	Chr1	1946713	1947634	135.8	1358
AT1G06400	(ARA-2)	Chr1	1951862	1952897	156.3	1563
AT1G06410	TREHALOSE-PHOSPHATASE/SYNTHASE 7 (TPS7)	Chr1	1954795	1955899	141.2	1412
AT1G06430	FTSH PROTEASE 8 (ftsh8)	Chr1	1962104	1962989	44.2	442
AT1G06440	Ubiquitin carboxyl-terminal hydrolase family protein	Chr1	1963678	1964910	67.5	675
AT1G06450	Polynucleotidyl transferase%2C ribonuclease H-like superfamily protein	Chr1	1965843	1967028	83.2	832
AT1G06460	ALPHA-CRYSTALLIN DOMAIN 32.1 (ACD32.1)	Chr1	1968936	1970518	82.1	821
AT1G06470	Nucleotide/sugar transporter family protein	Chr1	1968936	1970518	91.5	915
AT1G06475	transmembrane protein	Chr1	1973870	1974419	62.1	621
AT1G06500	hypothetical protein	Chr1	1989431	1990161	96.3	963
AT1G06510	forkhead-associated domain protein	Chr1	1991461	1993081	104.9	1049
AT1G06515	SMALL SUBUNIT OF SPT A; SSSPTA	Chr1	1991461	1993081	88.9	889
AT1G06520	GLYCEROL-3-PHOSPHATE ACYLTRANSFERASE 1 (GPAT1)	Chr1	1994545	1996044	47	470
AT1G06530	PEROXISOMAL AND MITOCHONDRIAL DIVISION FACTOR 2 (PMD2)	Chr1	2001353	2002766	225	2250
AT1G06550	ATP-dependent caseinolytic (Clp) protease/crotonase family protein	Chr1	2005915	2007197	81.1	811
AT1G06560	NOP2C	Chr1	2007562	2008486	146.9	1469
AT1G06570	PHYTOENE DESATURATION 1 (PDS1)	Chr1	2012156	2013569	183.9	1839
AT1G06580	PENTATRICOPEPTIDE REPEAT 1; PPR1	Chr1	2015165	2016186	161.2	1612
AT1G06590	anaphase-promoting complex subunit	Chr1	2023797	2024750	197.5	1975
AT1G06620	2-oxoglutarate (2OG) and Fe(II)-dependent oxygenase superfamily protein	Chr1	2025511	2026262	141.6	1416
AT1G06630	F-box/RNI-like superfamily protein	Chr1	2027734	2028549	126.5	1265
AT1G06650	2-oxoglutarate (2OG) and Fe(II)-dependent oxygenase superfamily protein	Chr1	2035798	2037018	123.9	1239
AT1G06670	NUCLEAR DEIH-BOXHELICASE (NIH)	Chr1	2039767	2041307	204.6	2046
AT1G06680	PHOTOSYSTEM II SUBUNIT P-1 (PSBP-1)	Chr1	2047770	2048861	158.2	1582
AT1G06690	NAD(P)-linked oxidoreductase superfamily protein	Chr1	2051317	2052233	155.9	1559
AT1G06700	Protein kinase superfamily protein	Chr1	2054315	2055406	144.9	1449
AT1G06710	Tetratricopeptide repeat (TPR)-like superfamily protein	Chr1	2059430	2061376	208.5	2085
AT1G06720	P-loop containing nucleoside triphosphate hydrolases superfamily protein	Chr1	2066413	2068394	166.2	1662
AT1G06730	pfkB-like carbohydrate kinase family protein	Chr1	2066413	2068394	164.5	1645
AT1G06760	H1.1; HISTONE 1.1	Chr1	2076263	2077836	223.1	2231
AT1G06770	DREB2A-INTERACTING PROTEIN 1 (DRIP1)	Chr1	2081077	2081986	128.2	1282
AT1G06780	GALACTURONOSYLTRANSFERASE 6 (GAUT6)	Chr1	2083332	2084400	154.8	1548
AT1G06790	RNA polymerase Rpb7 N-terminal domain-containing protein	Chr1	2087197	2087945	74.1	741
AT1G06800	PHOSPHOLIPASE A I GAMMA 1 (PLA-I\{gamma\}1)	Chr1	2090094	2091526	214	2140
AT1G06820	CAROTENOID ISOMERASE (CRTISO)	Chr1	2095595	2097466	158	1580
AT1G06840	Leucine-rich repeat protein kinase family protein	Chr1	2102031	2103360	163.8	1638
AT1G06850	BASIC LEUCINE-ZIPPER 52 (bZIP52)	Chr1	2105083	2106260	121.4	1214
AT1G06870	PLASTIDIC TYPE I SIGNAL PEPTIDASE 2A (PLSP2A)	Chr1	2108556	2109862	152.1	1521
AT1G06890	UDP-XYLOSE TRANSPORTER3; UXT3	Chr1	2113579	2114647	207.9	2079
AT1G06900	Insulinase (Peptidase family M16) family protein	Chr1	2119887	2122106	170.2	1702
AT1G06910	TRF-LIKE 7 (TRFL7)	Chr1	2119887	2122106	212.2	2122
AT1G06950	TRANSLOCON AT THE INNER ENVELOPE MEMBRANE OF CHLOROPLASTS 110 (TIC110)	Chr1	2134434	2136585	257.9	2579
AT1G06960	RNA-binding (RRM/RBD/RNP motifs) family protein	Chr1	2134434	2136585	82.7	827
AT1G06980	6%2C7-dimethyl-8-ribityllumazine synthase	Chr1	2142950	2143883	201.3	2013
AT1G07000	EXOCYST SUBUNIT EXO70 FAMILY PROTEIN B2 (EXO70B2)	Chr1	2150900	2152452	138.7	1387
AT1G07010	SHEWENELLA-LIKE PROTEIN PHOSPHATASE 1 (SLP1)	Chr1	2152843	2153519	88.9	889
AT1G07020	hypothetical protein	Chr1	2155206	2155974	78.4	784
AT1G07030	Mitochondrial substrate carrier family protein	Chr1	2159498	2160770	131.2	1312
AT1G07040	plant/protein	Chr1	2161858	2163213	162.2	1622
AT1G07060	DSB FORMATION (DFO)	Chr1	2167819	2169283	70.1	701
AT1G07070	Ribosomal protein L35Ae family protein	Chr1	2167819	2169283	153	1530
AT1G07080	Thioredoxin superfamily protein	Chr1	2169859	2170919	132.7	1327
AT1G07090	LIGHT SENSITIVE HYPOCOTYLS 6 (LSH6)	Chr1	2173782	2175012	225.6	2256
AT1G07110	"FRUCTOSE-2,6-BISPHOSPHATASE" (F2KP)	Chr1	2183171	2185096	164.2	1642
AT1G07119		Chr1	2183171	2185096	72.6	726
AT1G07128		Chr1	2187668	2188489	124.2	1242
AT1G07130	(STN1)	Chr1	2187668	2188489	124.2	1242
AT1G07135	glycine-rich protein	Chr1	2190052	2190684	95.1	951
AT1G07140	(SIRANBP)	Chr1	2192764	2193885	127.3	1273
AT1G07150	MITOGEN-ACTIVATED PROTEIN KINASE KINASE KINASE 13 (MAPKKK13)	Chr1	2194623	2195839	119.9	1199
AT1G07160	Protein phosphatase 2C family protein	Chr1	2199063	2199784	145.4	1454
AT1G07170	PHF5-like protein	Chr1	2200072	2200959	150.3	1503
AT1G07200	Double Clp-N motif-containing P-loop nucleoside triphosphate hydrolases superfamily protein	Chr1	2211058	2212638	213.3	2133
AT1G07210	Ribosomal protein S18	Chr1	2215210	2215978	119.3	1193
AT1G07220	O-glucosyltransferase rumi-like protein (DUF821)	Chr1	2218243	2219387	92.2	922
AT1G07230	NON-SPECIFIC PHOSPHOLIPASE C1 (NPC1)	Chr1	2221606	2222913	66.8	668
AT1G07250	UDP-GLUCOSYL TRANSFERASE 71C4 (UGT71C4)	Chr1	2225948	2227175	50.3	503
AT1G07260	UDP-GLUCOSYL TRANSFERASE 71C3 (UGT71C3)	Chr1	2227757	2229113	83.3	833
AT1G07270	Cell division control%2C Cdc6	Chr1	2232385	2233118	132.8	1328
AT1G07280	Tetratricopeptide repeat (TPR)-like superfamily protein	Chr1	2238151	2239905	123.2	1232
AT1G07310	Calcium-dependent lipid-binding (CaLB domain) family protein	Chr1	2247570	2250107	143.7	1437
AT1G07320	RIBOSOMAL PROTEIN L4 (RPL4)	Chr1	2247570	2250107	157.3	1573
AT1G07350	SERINE/ARGININE RICH-LIKE PROTEIN 45A (SR45a)	Chr1	2259270	2260202	88.9	889
AT1G07360	MOS4-ASSOCIATED COMPLEX SUBUNIT 5A (MAC5A)	Chr1	2261901	2263821	130.1	1301
AT1G07370	PROLIFERATING CELLULAR NUCLEAR ANTIGEN 1 (PCNA1)	Chr1	2261901	2263821	156	1560
AT1G07390	RECEPTOR LIKE PROTEIN 1 (RLP1)	Chr1	2269629	2270973	48	480
AT1G07400	HSP20-like chaperones superfamily protein	Chr1	2274949	2275776	144.8	1448
AT1G07410	RAB GTPASE HOMOLOG A2B (RABA2b)	Chr1	2275922	2276773	98.8	988
AT1G07420	STEROL 4-ALPHA-METHYL-OXIDASE 2-1 (SMO2-1)	Chr1	2277781	2278643	82.6	826
AT1G07430	HIGHLY ABA-INDUCED PP2C GENE 2 (HAI2)	Chr1	2281152	2282838	107.5	1075
AT1G07470	Transcription factor IIA%2C alpha/beta subunit	Chr1	2291288	2292501	261.7	2617
AT1G07480	Transcription factor IIA%2C alpha/beta subunit	Chr1	2298426	2299628	267.1	2671
AT1G07500	hypothetical protein	Chr1	2304501	2305181	143.4	1434
AT1G07510	FTSH PROTEASE 10 (ftsh10)	Chr1	2305330	2306360	260.3	2603
AT1G07520	GRAS family transcription factor	Chr1	2310588	2312186	136.6	1366
AT1G07530	SCARECROW-LIKE 14 (SCL14)	Chr1	2315194	2316489	186.8	1868
AT1G07570	(APK1A)	Chr1	2332369	2333743	85.5	855
AT1G07590	Tetratricopeptide repeat (TPR)-like superfamily protein	Chr1	2337174	2338500	92.4	924
AT1G07600	METALLOTHIONEIN 1A (MT1A)	Chr1	2338776	2339419	61.9	619
AT1G07615	OBG A-1	Chr1	2342347	2344430	63.4	634
AT1G07630	POL-LIKE 5 (PLL5)	Chr1	2349002	2350804	249.5	2495
AT1G07650	Leucine-rich repeat transmembrane protein kinase	Chr1	2363969	2364799	131.3	1313
AT1G07660	Histone superfamily protein	Chr1	2368850	2369732	170.1	1701
AT1G07670	ENDOMEMBRANE-TYPE CA-ATPASE 4 (ECA4)	Chr1	2372839	2374647	116.5	1165
AT1G07700	Thioredoxin superfamily protein	Chr1	2379538	2380326	146.6	1466
AT1G07705	NEGATIVE ON TATA LESS2A; NOT2A	Chr1	2381560	2382582	163.1	1631
AT1G07725	EXOCYST SUBUNIT EXO70 FAMILY PROTEIN H6 (EXO70H6)	Chr1	2395406	2397023	158.6	1586
AT1G07728		Chr1	2395406	2397023	158.6	1586
AT1G07740	Tetratricopeptide repeat (TPR)-like superfamily protein	Chr1	2399562	2400612	118.2	1182
AT1G07745	HOMOLOG OF RAD51 D (RAD51D)	Chr1	2402158	2402927	95.5	955
AT1G07750	RmlC-like cupins superfamily protein	Chr1	2404898	2406012	99.2	992
AT1G07790	(HTB1)	Chr1	2412958	2413957	98.8	988
AT1G07810	ER-TYPE CA2+-ATPASE 1 (ECA1)	Chr1	2416249	2416919	82.9	829
AT1G07820	Histone superfamily protein	Chr1	2421148	2422002	146.6	1466
AT1G07830	ribosomal protein L29 family protein	Chr1	2422229	2423164	171.4	1714
AT1G07840	Sas10/Utp3/C1D family	Chr1	2424028	2424699	62.6	626
AT1G07870	Protein kinase superfamily protein	Chr1	2430400	2432096	213.5	2135
AT1G07890	ASCORBATE PEROXIDASE 1 (APX1)	Chr1	2437366	2439313	197.2	1972
AT1G07910	RNALIGASE (RNL)	Chr1	2445426	2447023	185.8	1858
AT1G07920	GTP binding Elongation factor Tu family protein	Chr1	2454858	2456190	150.4	1504
AT1G07930	GTP binding Elongation factor Tu family protein	Chr1	2458227	2459636	152.8	1528
AT1G07940	GTP binding Elongation factor Tu family protein	Chr1	2464212	2465520	122.3	1223
AT1G07950	(MED22B)	Chr1	2466021	2467802	148.9	1489
AT1G07960	PDI-LIKE 5-1 (PDIL5-1)	Chr1	2466021	2467802	71.5	715
AT1G07970	cytochrome B561%2C amino-terminal protein	Chr1	2471846	2472696	198.9	1989
AT1G07980	"NUCLEAR FACTOR Y, SUBUNIT C10" (NF-YC10)	Chr1	2474100	2474980	158.6	1586
AT1G07990	SIT4 phosphatase-associated family protein	Chr1	2477063	2478172	197.3	1973
AT1G08000	GATA TRANSCRIPTION FACTOR 10 (GATA10)	Chr1	2483514	2485174	146.7	1467
AT1G08010	GATA TRANSCRIPTION FACTOR 11 (GATA11)	Chr1	2486881	2488043	106	1060
AT1G08030	TYROSYLPROTEIN SULFOTRANSFERASE (TPST)	Chr1	2492213	2493373	272.7	2727
AT1G08040	trimethylguanosine synthase (DUF707)	Chr1	2497691	2498738	107.3	1073
AT1G08050	Zinc finger (C3HC4-type RING finger) family protein	Chr1	2500284	2501499	210.3	2103
AT1G08060	MORPHEUS MOLECULE (MOM)	Chr1	2510228	2511211	264.8	2648
AT1G08070	ORGANELLE TRANSCRIPT PROCESSING 82 (OTP82)	Chr1	2515555	2516727	285.9	2859
AT1G08110	ATGLYI2; GLYOXALASE12	Chr1	2535206	2536223	297.7	2977
AT1G08125	S-adenosyl-L-methionine-dependent methyltransferases superfamily protein	Chr1	2541529	2542398	106.4	1064
AT1G08130	DNA LIGASE 1 (LIG1)	Chr1	2546664	2548010	334.8	3348
AT1G08180	cyclin-dependent kinase inhibitor	Chr1	2564375	2565217	146.8	1468
AT1G08190	VACUOLAR PROTEIN SORTING 41 (VPS41)	Chr1	2567385	2568416	246.3	2463
AT1G08200	UDP-D-APIOSE/UDP-D-XYLOSE SYNTHASE 2 (AXS2)	Chr1	2575687	2576836	182.6	1826
AT1G08210	Eukaryotic aspartyl protease family protein	Chr1	2579805	2580750	153.5	1535
AT1G08220	ATPase complex subunit	Chr1	2582489	2583398	138.9	1389
AT1G08230	Transmembrane amino acid transporter family protein	Chr1	2586154	2586779	50.2	502
AT1G08250	AROGENATE DEHYDRATASE 6 (ADT6)	Chr1	2588974	2590447	185.4	1854
AT1G08260	TILTED 1 (TIL1)	Chr1	2590705	2591504	160	1600
AT1G08270	vacuolar protein sorting-associated protein	Chr1	2606453	2607565	129.8	1298
AT1G08280	GALT29A; GLYCOSYLTRANSFERASE 29A	Chr1	2608002	2609094	171.1	1711
AT1G08290	WIP DOMAIN PROTEIN 3 (WIP3)	Chr1	2612453	2613222	75.4	754
AT1G08300	NO VEIN-LIKE (NVL)	Chr1	2614938	2616317	164.1	1641
AT1G08315	ARM repeat superfamily protein	Chr1	2619991	2621625	210.1	2101
AT1G08340	Rho GTPase activating protein with PAK-box/P21-Rho-binding domain-containing protein	Chr1	2630956	2631556	72.3	723
AT1G08350	Endomembrane protein 70 protein family	Chr1	2634970	2635892	149.2	1492
AT1G08360	Ribosomal protein L1p/L10e family	Chr1	2635984	2636956	88.9	889
AT1G08370	DECAPPING 1 (DCP1)	Chr1	2638120	2638972	103.6	1036
AT1G08390	recQ-mediated instability-like protein	Chr1	2642150	2642722	73.5	735
AT1G08400	RINT-1 / TIP-1 family	Chr1	2645076	2647053	88.1	881
AT1G08410	P-loop containing nucleoside triphosphate hydrolases superfamily protein	Chr1	2645076	2647053	61.5	615
AT1G08420	BRI1 SUPPRESSOR 1 (BSU1)-LIKE 2 (BSL2)	Chr1	2649674	2650760	149.9	1499
AT1G08440	aluminum activated malate transporter family protein	Chr1	2662935	2664540	88.2	882
AT1G08450	CALRETICULIN 3 (CRT3)	Chr1	2670909	2671919	172.2	1722
AT1G08460	HISTONE DEACETYLASE 8 (HDA08)	Chr1	2672361	2673659	216.7	2167
AT1G08470	STRICTOSIDINE SYNTHASE-LIKE 3 (SSL3)	Chr1	2682306	2685114	54.4	544
AT1G08480	SUCCINATE DEHYDROGENASE 6 (SDH6)	Chr1	2682306	2685114	105.9	1059
AT1G08490	CHLOROPLASTIC NIFS-LIKE CYSTEINE DESULFURASE (CPNIFS)	Chr1	2687719	2688642	137.7	1377
AT1G08510	FATTY ACYL-ACP THIOESTERASES B (FATB)	Chr1	2692834	2694295	97.3	973
AT1G08520	ALBINA 1 (ALB1)	Chr1	2696396	2697408	156.8	1568
AT1G08530	chitinase-like protein	Chr1	2701101	2701940	131.7	1317
AT1G08540	RNAPOLYMERASE SIGMA SUBUNIT 2 (SIG2)	Chr1	2703290	2704150	120.4	1204
AT1G08550	NON-PHOTOCHEMICAL QUENCHING 1 (NPQ1)	Chr1	2706891	2707744	87	870
AT1G08570	ATYPICAL CYS HIS RICH THIOREDOXIN 4 (ACHT4)	Chr1	2712888	2714312	149.1	1491
AT1G08580	hypothetical protein	Chr1	2715515	2716479	158.3	1583
AT1G08590	ATPXL1; PHLOEM INTERCALATED WITH XYLEM-LIKE 1; PXL1; PXY-LIKE1	Chr1	2720788	2722046	251.7	2517
AT1G08592		Chr1	2720788	2722046	251.7	2517
AT1G08600	(ATRX)	Chr1	2723636	2724583	204.1	2041
AT1G08610	Pentatricopeptide repeat (PPR) superfamily protein	Chr1	2734736	2735892	175.4	1754
AT1G08620	(PKDM7D)	Chr1	2736731	2737922	119.3	1193
AT1G08640	CHLOROPLAST J-LIKE DOMAIN 1 (CJD1)	Chr1	2750405	2751356	209.4	2094
AT1G08650	PHOSPHOENOLPYRUVATE CARBOXYLASE KINASE 1 (PPCK1)	Chr1	2752073	2753289	223.5	2235
AT1G08660	MALE GAMETOPHYTE DEFECTIVE 2 (MGP2)	Chr1	2758875	2759904	255.1	2551
AT1G08680	ARF GAP-LIKE ZINC FINGER-CONTAINING PROTEIN ZIGA4 (ZIGA4)	Chr1	2762519	2763493	228.3	2283
AT1G08700	PRESENILIN-1 (PS1)	Chr1	2770402	2772608	144.5	1445
AT1G08710	F-box family protein	Chr1	2770402	2772608	136.9	1369
AT1G08720	ENHANCED DISEASE RESISTANCE 1 (EDR1)	Chr1	2773940	2775233	146.9	1469
AT1G08750	ATGPI8; GPI8	Chr1	2800953	2801881	229.6	2296
AT1G08760	GPI-anchored adhesin-like protein%2C putative (DUF936)	Chr1	2805184	2806382	124.6	1246
AT1G08770	PRENYLATED RAB ACCEPTOR 1.E (PRA1.E)	Chr1	2808823	2809815	148.4	1484
AT1G08780	ABI3-INTERACTING PROTEIN 3 (AIP3)	Chr1	2810511	2811307	121.5	1215
AT1G08800	MYOB1; MYOSIN BINDING PROTEIN 1	Chr1	2816107	2817947	175.4	1754
AT1G08820	VAMP/SYNAPTOBREVIN-ASSOCIATED PROTEIN 27-2 (VAP27-2)	Chr1	2824268	2825419	206	2060
AT1G08830	COPPER/ZINC SUPEROXIDE DISMUTASE 1 (CSD1)	Chr1	2827024	2828337	186.2	1862
AT1G08845	Ribosomal L18p/L5e family protein	Chr1	2837922	2839889	211.7	2117
AT1G08880	(H2AXA)	Chr1	2846615	2847917	259.6	2596
AT1G08890	Major facilitator superfamily protein	Chr1	2848217	2848996	106.8	1068
AT1G08910	zinc ion binding protein	Chr1	2856038	2857237	120.2	1202
AT1G08920	ERD (EARLY RESPONSE TO DEHYDRATION) SIX-LIKE 1 (ESL1)	Chr1	2867283	2869418	176.7	1767
AT1G08930	EARLY RESPONSE TO DEHYDRATION 6 (ERD6)	Chr1	2873480	2875141	120.2	1202
AT1G08940	Phosphoglycerate mutase family protein	Chr1	2877606	2878226	67.1	671
AT1G08960	CATION EXCHANGER 11 (CAX11)	Chr1	2879616	2880735	126.7	1267
AT1G08970	"NUCLEAR FACTOR Y, SUBUNIT C9" (NF-YC9)	Chr1	2882536	2883616	54.5	545
AT1G08990	PLANT GLYCOGENIN-LIKE STARCH INITIATION PROTEIN 5 (PGSIP5)	Chr1	2888739	2889470	52.2	522
AT1G09000	NPK1-RELATED PROTEIN KINASE 1 (NP1)	Chr1	2890907	2891911	270.2	2702
AT1G09010	glycoside hydrolase family 2 protein	Chr1	2898250	2899504	229.8	2298
AT1G09020	HOMOLOG OF YEAST SUCROSE NONFERMENTING 4 (SNF4)	Chr1	2903829	2904955	285.9	2859
AT1G09040	arginine-glutamic acid dipeptide repeat protein	Chr1	2911192	2912246	206.4	2064
AT1G09060	JMJ24	Chr1	2924891	2925804	106.4	1064
AT1G09070	SOYBEAN GENE REGULATED BY COLD-2 (SRC2)	Chr1	2927644	2928901	156.2	1562
AT1G09100	26S PROTEASOME AAA-ATPASE SUBUNIT RPT5B (RPT5B)	Chr1	2938521	2939417	132.5	1325
AT1G09130	ATP-dependent caseinolytic (Clp) protease/crotonase family protein	Chr1	2941301	2942349	171.4	1714
AT1G09140	SERINE/ARGININE-RICH PROTEIN SPLICING FACTOR 30 (SR30)	Chr1	2944985	2945956	132.7	1327
AT1G09150	pseudouridine synthase and archaeosine transglycosylase (PUA) domain-containing protein	Chr1	2946157	2946883	129.5	1295
AT1G09160	Protein phosphatase 2C family protein	Chr1	2954494	2955824	241.8	2418
AT1G09180	SECRETION-ASSOCIATED RAS SUPER FAMILY 1 (SARA1A)	Chr1	2965011	2966117	79.1	791
AT1G09190	Tetratricopeptide repeat (TPR)-like superfamily protein	Chr1	2966691	2967808	140.5	1405
AT1G09195	Ppx-GppA phosphatase	Chr1	2970893	2972266	94.9	949
AT1G09200	Histone superfamily protein	Chr1	2970893	2972266	108.8	1088
AT1G09210	CALRETICULIN 1B (CRT1b)	Chr1	2975039	2976826	63.2	632
AT1G09230	RNA-binding (RRM/RBD/RNP motifs) family protein	Chr1	2981738	2982733	211.4	2114
AT1G09250	basic helix-loop-helix (bHLH) DNA-binding superfamily protein	Chr1	2989145	2990305	275.3	2753
AT1G09270	IMPORTIN ALPHA ISOFORM 4 (IMPA-4)	Chr1	2994276	2995415	287.3	2873
AT1G09280	rhodanese-like domain protein	Chr1	3000587	3001871	159.3	1593
AT1G09300	ATICP55	Chr1	3003000	3004534	173	1730
AT1G09320	agenet domain-containing protein	Chr1	3011115	3012427	193.6	1936
AT1G09330	golgi apparatus membrane protein-like protein ECHIDNA protein	Chr1	3014312	3015085	67.8	678
AT1G09340	CHLOROPLAST RNA BINDING (CRB)	Chr1	3015312	3016004	58	580
AT1G09350	GALACTINOL SYNTHASE 3 (GolS3)	Chr1	3019806	3020314	41.4	414
AT1G09400	FMN-linked oxidoreductases superfamily protein	Chr1	3033126	3034880	49.9	499
AT1G09420	GLUCOSE-6-PHOSPHATE DEHYDROGENASE 4 (G6PD4)	Chr1	3041059	3043110	122.8	1228
AT1G09430	ATP-CITRATE LYASE A-3 (ACLA-3)	Chr1	3041059	3043110	166.7	1667
AT1G09450	HASPIN-RELATED GENE (Haspin)	Chr1	3048917	3049815	93.8	938
AT1G09460	Carbohydrate-binding X8 domain superfamily protein	Chr1	3053794	3055044	136.7	1367
AT1G09490	NAD(P)-binding Rossmann-fold superfamily protein	Chr1	3064075	3065554	57.4	574
AT1G09520	hypothetical protein	Chr1	3070813	3072195	273.9	2739
AT1G09530	PHYTOCHROME INTERACTING FACTOR 3 (PIF3)	Chr1	3076387	3077568	101.8	1018
AT1G09540	MYB DOMAIN PROTEIN 61 (MYB61)	Chr1	3086197	3087533	43.9	439
AT1G09560	GERMIN-LIKE PROTEIN 5 (GLP5)	Chr1	3093699	3094871	291.4	2914
AT1G09570	PHYTOCHROME A (PHYA)	Chr1	3099372	3100639	93.9	939
AT1G09575	calcium uniporter-like protein (DUF607)	Chr1	3101983	3103000	74.5	745
AT1G09580	emp24/gp25L/p24 family/GOLD family protein	Chr1	3104520	3105212	104.9	1049
AT1G09590	Translation protein SH3-like family protein	Chr1	3106434	3107542	136.9	1369
AT1G09620	ATP binding/leucine-tRNA ligases/aminoacyl-tRNA ligase	Chr1	3115411	3116743	155.8	1558
AT1G09630	RAB GTPASE 11C (RAB11c)	Chr1	3118942	3119633	64.2	642
AT1G09640	Translation elongation factor EF1B%2C gamma chain	Chr1	3119900	3120803	79.3	793
AT1G09645	transmembrane protein	Chr1	3122980	3123906	106.7	1067
AT1G09660	RNA-binding KH domain-containing protein	Chr1	3130102	3131098	216.3	2163
AT1G09680	Pentatricopeptide repeat (PPR) superfamily protein	Chr1	3135032	3136034	126.2	1262
AT1G09690	Translation protein SH3-like family protein	Chr1	3136599	3137557	121.9	1219
AT1G09700	HYPONASTIC LEAVES 1 (HYL1)	Chr1	3139412	3140317	108.1	1081
AT1G09710	Homeodomain-like superfamily protein	Chr1	3140845	3141664	124.1	1241
AT1G09730	ARABIDOPSIS SUMO PROTEASE 1; ASP1	Chr1	3153516	3155418	146.8	1468
AT1G09740	Adenine nucleotide alpha hydrolases-like superfamily protein	Chr1	3153516	3155418	252.5	2525
AT1G09760	U2 SMALL NUCLEAR RIBONUCLEOPROTEIN A (U2A')	Chr1	3160901	3162685	159.3	1593
AT1G09770	CELL DIVISION CYCLE 5 (CDC5)	Chr1	3160901	3162685	161.9	1619
AT1G09780	2,3-BIPHOSPHOGLYCERATE-INDEPENDENT PHOSPHOGLYCERATE MUTASE 1 (iPGAM1)	Chr1	3166474	3167992	237.6	2376
AT1G09794	Cox19 family protein (CHCH motif)	Chr1	3172063	3172918	119.8	1198
AT1G09795	ATP PHOSPHORIBOSYL TRANSFERASE 2 (ATP-PRT2)	Chr1	3173382	3174550	285.5	2855
AT1G09800	Pseudouridine synthase family protein	Chr1	3179627	3180541	246.4	2464
AT1G09810	EVOLUTIONARILY CONSERVED C-TERMINAL REGION 11 (ECT11)	Chr1	3183373	3184244	104.7	1047
AT1G09812	multidrug resistance protein	Chr1	3187535	3188250	75.3	753
AT1G09815	POLYMERASE DELTA 4 (POLD4)	Chr1	3189330	3190261	89.5	895
AT1G09820	Pentatricopeptide repeat (PPR-like) superfamily protein	Chr1	3191722	3192594	95.9	959
AT1G09830	PURINE BIOSYNTHESIS 2 (PUR2)	Chr1	3194009	3195020	149.5	1495
AT1G09840	SHAGGY-LIKE PROTEIN KINASE 41 (SK41)	Chr1	3198830	3200281	133.5	1335
AT1G09850	XYLEM BARK CYSTEINE PEPTIDASE 3 (XBCP3)	Chr1	3201783	3202512	113.6	1136
AT1G09870	histidine acid phosphatase family protein	Chr1	3205614	3206631	220.2	2202
AT1G09900	Pentatricopeptide repeat (PPR-like) superfamily protein	Chr1	3217874	3218778	225.4	2254
AT1G09910	Rhamnogalacturonate lyase family protein	Chr1	3223940	3227114	79.7	797
AT1G09920	TRAF-type zinc finger-like protein	Chr1	3223940	3227114	183.6	1836
AT1G09940	(HEMA2)	Chr1	3238219	3239502	218.6	2186
AT1G09950	RESPONSE TO ABA AND SALT 1 (RAS1)	Chr1	3240699	3241518	132.3	1323
AT1G09960	SUCROSE TRANSPORTER 4 (SUT4)	Chr1	3244118	3245693	182.4	1824
AT1G09970	(LRR XI-23)	Chr1	3252253	3255047	173.9	1739
AT1G09980	Putative serine esterase family protein	Chr1	3260635	3261596	75.2	752
AT1G09995	DNA repair DEAD helicase RAD3/XP-D subfamily protein	Chr1	3262776	3263659	93.4	934
AT1G10000	Ribonuclease H-like superfamily protein	Chr1	3263809	3264963	178.8	1788
AT1G10020	formin-like protein (DUF1005)	Chr1	3270045	3272054	147.1	1471
AT1G10030	HOMOLOG OF YEAST ERGOSTEROL28 (ERG28)	Chr1	3273822	3274488	57.5	575
AT1G10040	alpha/beta-Hydrolases superfamily protein	Chr1	3277768	3278730	147.4	1474
AT1G10050	glycosyl hydrolase family 10 protein / carbohydrate-binding domain-containing protein	Chr1	3278978	3279996	152.5	1525
AT1G10070	BRANCHED-CHAIN AMINO ACID TRANSAMINASE 2 (BCAT-2)	Chr1	3288212	3290125	88.2	882
AT1G10090	Early-responsive to dehydration stress protein (ERD4)	Chr1	3295244	3296246	146.2	1462
AT1G10095	Protein prenylyltransferase superfamily protein	Chr1	3299606	3301146	151.2	1512
AT1G10110	F-box family protein	Chr1	3302746	3303464	45.7	457
AT1G10120	CIB4; CRY2-INTERACTING BHLH 4	Chr1	3305227	3306639	167.4	1674
AT1G10130	ENDOPLASMIC RETICULUM-TYPE CALCIUM-TRANSPORTING ATPASE 3 (ECA3)	Chr1	3310799	3311743	254.8	2548
AT1G10140	Uncharacterized conserved protein UCP031279	Chr1	3321655	3323547	105.2	1052
AT1G10150	Carbohydrate-binding protein	Chr1	3325929	3327371	55.8	558
AT1G10180	LOW protein: exocyst complex component-like protein	Chr1	3340712	3341702	115.4	1154
AT1G10200	WLIM1 (WLIM1)	Chr1	3346517	3347901	154.3	1543
AT1G10210	MITOGEN-ACTIVATED PROTEIN KINASE 1 (MPK1)	Chr1	3349183	3350290	87.8	878
AT1G10230	SKP1-LIKE 18 (SK18)	Chr1	3355489	3356411	192.6	1926
AT1G10240	FAR1-RELATED SEQUENCE 11 (FRS11)	Chr1	3358863	3359807	54.8	548
AT1G10270	GLUTAMINE-RICH PROTEIN 23 (GRP23)	Chr1	3363386	3364758	138	1380
AT1G10280	Core-2/I-branching beta-1%2C6-N-acetylglucosaminyltransferase family protein	Chr1	3367983	3369147	124.1	1241
AT1G10290	DYNAMIN-LIKE PROTEIN 6 (ADL6)	Chr1	3370407	3371464	212.6	2126
AT1G10300	Nucleolar GTP-binding protein	Chr1	3377917	3378818	58	580
AT1G10310	NAD(P)-binding Rossmann-fold superfamily protein	Chr1	3383354	3384073	104.6	1046
AT1G10320	Zinc finger C-x8-C-x5-C-x3-H type family protein	Chr1	3387339	3389360	112	1120
AT1G10330	Tetratricopeptide repeat (TPR)-like superfamily protein	Chr1	3387339	3389360	101.5	1015
AT1G10350	DNAJ heat shock family protein	Chr1	3393755	3395147	245.9	2459
AT1G10390	DRA2; DRACULA2	Chr1	3411826	3412968	243.3	2433
AT1G10410	CW14 protein (DUF1336)	Chr1	3417828	3419614	201.4	2014
AT1G10417	RUN/FYVE domain protein	Chr1	3424358	3425650	100.5	1005
AT1G10430	PROTEIN PHOSPHATASE 2A-2 (PP2A-2)	Chr1	3429533	3430678	161	1610
AT1G10450	SIN3-LIKE 6 (SNL6)	Chr1	3431688	3432869	192.4	1924
AT1G10460	GERMIN-LIKE PROTEIN 7 (GLP7)	Chr1	3439540	3440335	207.5	2075
AT1G10470	RESPONSE REGULATOR 4 (ARR4)	Chr1	3442559	3443958	192.7	1927
AT1G10480	ZINC FINGER PROTEIN 5 (ZFP5)	Chr1	3449621	3450503	146.6	1466
AT1G10490	GNAT acetyltransferase (DUF699)	Chr1	3453074	3453929	137	1370
AT1G10500	CHLOROPLAST-LOCALIZED ISCA-LIKE PROTEIN (CPISCA)	Chr1	3460630	3462806	119.7	1197
AT1G10510	EMBRYO DEFECTIVE 2004 (emb2004)	Chr1	3460630	3462806	222.5	2225
AT1G10520	DNA POLYMERASE \{LAMBDA\} (Pol\{lambda\})	Chr1	3465805	3466377	52.7	527
AT1G10522	PLASTID REDOX INSENSITIVE 2 (PRIN2)	Chr1	3469859	3470663	99.6	996
AT1G10530	D-ribose-binding periplasmic protein	Chr1	3471273	3472713	211.7	2117
AT1G10540	NUCLEOBASE-ASCORBATE TRANSPORTER 8 (NAT8)	Chr1	3476868	3478036	174	1740
AT1G10560	PLANT U-BOX 18 (PUB18)	Chr1	3484583	3486640	142.5	1425
AT1G10570	OVERLY TOLERANT TO SALT 2 (OTS2)	Chr1	3487489	3488239	136.7	1367
AT1G10580	Transducin/WD40 repeat-like superfamily protein	Chr1	3492322	3493856	242	2420
AT1G10590	Nucleic acid-binding%2C OB-fold-like protein	Chr1	3502426	3504557	193.2	1932
AT1G10600	ASSOCIATED MOLECULE WITH THE SH3 DOMAIN OF STAM 2 (AMSH2)	Chr1	3502426	3504557	198.6	1986
AT1G10630	ADP-RIBOSYLATION FACTOR A1F (ARFA1F)	Chr1	3513918	3514837	176.7	1767
AT1G10650	SBP (S-ribonuclease binding protein) family protein	Chr1	3525001	3526441	74.4	744
AT1G10660	transmembrane protein	Chr1	3532386	3533397	157.8	1578
AT1G10670	ATP-CITRATE LYASE A-1 (ACLA-1)	Chr1	3535389	3536400	205.6	2056
AT1G10690	cyclin-dependent kinase inhibitor	Chr1	3549862	3550780	233.4	2334
AT1G10700	PHOSPHORIBOSYL PYROPHOSPHATE (PRPP) SYNTHASE 3 (PRS3)	Chr1	3554039	3555216	217.1	2171
AT1G10710	POOR HOMOLOGOUS SYNAPSIS 1 (PHS1)	Chr1	3558315	3559032	102.8	1028
AT1G10720	BSD domain-containing protein	Chr1	3562855	3564136	168.6	1686
AT1G10730	ADAPTOR PROTEIN-1 MU-ADAPTIN 1; AP1M1	Chr1	3565188	3566125	164	1640
AT1G10740	alpha/beta-Hydrolases superfamily protein	Chr1	3569630	3570920	199.4	1994
AT1G10750	carboxyl-terminal peptidase%2C putative (DUF239)	Chr1	3577240	3578498	131.9	1319
AT1G10760	STARCH EXCESS 1 (SEX1)	Chr1	3589605	3590655	79	790
AT1G10770	TRUE	Chr1	3591803	3592461	86.6	866
AT1G10780	F-box/RNI-like superfamily protein	Chr1	3594254	3595261	148.4	1484
AT1G10820	hypothetical protein (DUF3755)	Chr1	3604043	3605103	241.2	2412
AT1G10830	15-CIS-ZETA-CAROTENE ISOMERASE (Z-ISO)	Chr1	3606511	3607551	121.9	1219
AT1G10840	TRANSLATION INITIATION FACTOR 3 SUBUNIT H1 (TIF3H1)	Chr1	3609596	3610462	118.4	1184
AT1G10850	Leucine-rich repeat protein kinase family protein	Chr1	3611815	3613568	141	1410
AT1G10865	cytochrome C oxidase assembly factor	Chr1	3615464	3616215	81.2	812
AT1G10870	ARF-GAP DOMAIN 4 (AGD4)	Chr1	3623010	3623898	244.5	2445
AT1G10890	arginine/glutamate-rich 1 protein	Chr1	3627589	3628533	201.6	2016
AT1G10900	Phosphatidylinositol-4-phosphate 5-kinase family protein	Chr1	3636410	3637260	126.9	1269
AT1G10910	EMBRYO DEFECTIVE 3103 (EMB3103)	Chr1	3639751	3640682	220.2	2202
AT1G10930	(RECQ4A)	Chr1	3647942	3649840	153.6	1536
AT1G10940	SNF1-RELATED PROTEIN KINASE 2.4 (SNRK2.4)	Chr1	3657362	3658513	129.3	1293
AT1G10950	TRANSMEMBRANE NINE 1 (TMN1)	Chr1	3659141	3659975	149.5	1495
AT1G10960	FERREDOXIN 1 (FD1)	Chr1	3664293	3665589	174.2	1742
AT1G10970	ZINC TRANSPORTER 4 PRECURSOR (ZIP4)	Chr1	3666084	3667226	44.1	441
AT1G10990	transmembrane protein	Chr1	3670273	3671130	143.4	1434
AT1G11000	MILDEW RESISTANCE LOCUS O 4 (MLO4)	Chr1	3671914	3672698	74.3	743
AT1G11020	RING/FYVE/PHD zinc finger superfamily protein	Chr1	3676717	3677764	181.2	1812
AT1G11050	Protein kinase superfamily protein	Chr1	3681803	3683190	163.8	1638
AT1G11060	ATWAPL1; WAPL1; WINGS APART-LIKE PROTEIN 1	Chr1	3684593	3685689	186.5	1865
AT1G11090	alpha/beta-Hydrolases superfamily protein	Chr1	3702518	3704039	311.2	3112
AT1G11100	FRG5; SNF2-RING-HELICASE?LIKE 5	Chr1	3708149	3709619	201.6	2016
AT1G11112	hypothetical protein	Chr1	3713139	3713696	58.1	581
AT1G11120	CTTNBP 2 amino-terminal-like protein	Chr1	3714987	3715958	231.1	2311
AT1G11125	hypothetical protein	Chr1	3718665	3719548	189.7	1897
AT1G11130	STRUBBELIG (SUB)	Chr1	3722816	3723893	134.4	1344
AT1G11160	Transducin/WD40 repeat-like superfamily protein	Chr1	3733106	3734176	61.8	618
AT1G11175		Chr1	3744816	3746389	157.6	1576
AT1G11180	SECRETORY CARRIER MEMBRANE PROTEIN 2 (SCAMP2)	Chr1	3744816	3746389	120.8	1208
AT1G11200	organic solute transporter ostalpha protein (DUF300)	Chr1	3753272	3754209	104.4	1044
AT1G11210	cotton fiber protein%2C putative (DUF761)	Chr1	3755963	3757033	85.6	856
AT1G11220	cotton fiber%2C putative (DUF761)	Chr1	3759931	3761280	77	770
AT1G11240	ribosomal RNA-processing protein	Chr1	3767445	3768430	272.5	2725
AT1G11260	SUGAR TRANSPORTER 1 (STP1)	Chr1	3777225	3778390	179.7	1797
AT1G11290	CHLORORESPIRATORY REDUCTION22 (CRR22)	Chr1	3793050	3794786	198.3	1983
AT1G11310	MILDEW RESISTANCE LOCUS O 2 (MLO2)	Chr1	3801980	3804113	132.1	1321
AT1G11320	GDSL esterase/lipase	Chr1	3807089	3808345	83	830
AT1G11330	S-locus lectin protein kinase family protein	Chr1	3810293	3811683	160.3	1603
AT1G11360	Adenine nucleotide alpha hydrolases-like superfamily protein	Chr1	3821822	3823124	324.7	3247
AT1G11370	Pectin lyase-like superfamily protein	Chr1	3828056	3829009	64.7	647
AT1G11380	PLAC8 family protein	Chr1	3832507	3833587	158.3	1583
AT1G11390	Protein kinase superfamily protein	Chr1	3836574	3837686	179	1790
AT1G11400	PARTNER OF Y14-MAGO (PYM)	Chr1	3837765	3838521	125.4	1254
AT1G11420	DOMAIN OF UNKNOWN FUNCTION 724 2 (DUF2)	Chr1	3845965	3848055	213.8	2138
AT1G11430	MULTIPLE ORGANELLAR RNA EDITING FACTOR 9 (MORF9)	Chr1	3845965	3848055	266.5	2665
AT1G11475	(NRPB10)	Chr1	3862365	3863149	136.7	1367
AT1G11480	eukaryotic translation initiation factor-like protein	Chr1	3865846	3867099	234.7	2347
AT1G11540	Sulfite exporter TauE/SafE family protein	Chr1	3876486	3877297	111.3	1113
AT1G11545	XYLOGLUCAN ENDOTRANSGLUCOSYLASE/HYDROLASE 8 (XTH8)	Chr1	3879433	3880442	156.8	1568
AT1G11560	Oligosaccharyltransferase complex/magnesium transporter family protein	Chr1	3881730	3882403	100.1	1001
AT1G11580	METHYLESTERASE PCR A (PMEPCRA)	Chr1	3888599	3890680	227.2	2272
AT1G11592		Chr1	3895554	3897038	268.6	2686
AT1G11630	Tetratricopeptide repeat (TPR)-like superfamily protein	Chr1	3913363	3914511	218.6	2186
AT1G11650	(RBP45B)	Chr1	3914715	3915940	203.1	2031
AT1G11660	heat shock protein 70 (Hsp 70) family protein	Chr1	3920489	3921304	135.1	1351
AT1G11670	MATE efflux family protein	Chr1	3930119	3931604	244.1	2441
AT1G11680	CYTOCHROME P450 51G1 (CYP51G1)	Chr1	3938417	3940373	251.7	2517
AT1G11700	senescence regulator (Protein of unknown function%2C DUF584)	Chr1	3945670	3946520	236.9	2369
AT1G11710	Pentatricopeptide repeat (PPR) superfamily protein	Chr1	3948620	3949610	193.6	1936
AT1G11720	STARCH SYNTHASE 3 (SS3)	Chr1	3951271	3952232	203.7	2037
AT1G11740	ankyrin repeat family protein	Chr1	3965694	3966912	175.8	1758
AT1G11750	CLP PROTEASE PROTEOLYTIC SUBUNIT 6 (CLPP6)	Chr1	3967448	3968279	149.5	1495
AT1G11755	LEAF WILTING 1 (LEW1)	Chr1	3971143	3971935	123.2	1232
AT1G11760	(MED32)	Chr1	3972373	3973360	152.4	1524
AT1G11780	oxidoreductase%2C 2OG-Fe(II) oxygenase family protein	Chr1	3978290	3979298	163.5	1635
AT1G11790	AROGENATE DEHYDRATASE 1 (ADT1)	Chr1	3981195	3982134	229.3	2293
AT1G11800	endonuclease/exonuclease/phosphatase family protein	Chr1	3986419	3987389	278.8	2788
AT1G11820	O-Glycosyl hydrolases family 17 protein	Chr1	3992285	3993635	171.3	1713
AT1G11840	GLYOXALASE I HOMOLOG (GLX1)	Chr1	3995293	3996279	116.7	1167
AT1G11860	Glycine cleavage T-protein family	Chr1	4001187	4002252	124.9	1249
AT1G11870	SERYL-TRNA SYNTHETASE (SRS)	Chr1	4003698	4004735	266.4	2664
AT1G11880	transferases%2C transferring hexosyl groups	Chr1	4009553	4010454	186.8	1868
AT1G11890	SECRETION 22 (SEC22)	Chr1	4010802	4011492	45.1	451
AT1G11900	Tetratricopeptide repeat (TPR)-like superfamily protein	Chr1	4013848	4015697	46.5	465
AT1G11905	B-cell receptor-associated protein 31-like protein	Chr1	4013848	4015697	140.5	1405
AT1G11910	ASPARTIC PROTEINASE A1 (APA1)	Chr1	4019309	4021029	72.1	721
AT1G11930	Putative pyridoxal phosphate-dependent enzyme%2C YBL036C type	Chr1	4028554	4029643	240.9	2409
AT1G11940	Core-2/I-branching beta-1%2C6-N-acetylglucosaminyltransferase family protein	Chr1	4033153	4034198	260	2600
AT1G11950	Transcription factor jumonji (jmjC) domain-containing protein	Chr1	4037971	4038939	123.7	1237
AT1G11960	ERD (early-responsive to dehydration stress) family protein	Chr1	4042930	4044078	133.2	1332
AT1G12000	Phosphofructokinase family protein	Chr1	4052845	4053986	278.8	2788
AT1G12020	hypothetical protein	Chr1	4062429	4063407	168.1	1681
AT1G12030	phosphoenolpyruvate carboxylase%2C putative (DUF506)	Chr1	4064815	4066465	66.6	666
AT1G12050	ATFAH; FAH; FUMARYLACETOACETATE HYDROLASE; SHORT-DAY SENSITIVE CELL DEATHSHORT-DAY SENSITIVE CELL DEATHSHORT-DAY SENSITIVE CELL DEATH 111; SSCD1	Chr1	4072627	4073713	251.6	2516
AT1G12060	BCL-2-ASSOCIATED ATHANOGENE 5 (BAG5)	Chr1	4076215	4077071	241.7	2417
AT1G12110	NITRATE TRANSPORTER 1.1 (NRT1.1)	Chr1	4105143	4106866	181	1810
AT1G12120	hypothetical protein (DUF863)	Chr1	4116466	4117556	96.3	963
AT1G12130	FMOGS-OX6	Chr1	4118521	4119149	103.9	1039
AT1G12140	FLAVIN-MONOOXYGENASE GLUCOSINOLATE S-OXYGENASE 5 (FMO GS-OX5)	Chr1	4121266	4122351	158.7	1587
AT1G12160	Flavin-binding monooxygenase family protein	Chr1	4126001	4127256	184.6	1846
AT1G12200	FLAVIN MONOOXYGENASE (FMO)	Chr1	4137432	4139560	180.5	1805
AT1G12210	RPS5-LIKE 1 (RFL1)	Chr1	4140809	4141500	44.2	442
AT1G12220	RESISTANT TO P. SYRINGAE 5 (RPS5)	Chr1	4144854	4145727	136.4	1364
AT1G12230	Aldolase superfamily protein	Chr1	4147864	4148744	232.3	2323
AT1G12240	(ATBETAFRUCT4)	Chr1	4153508	4154203	168.5	1685
AT1G12244	Polynucleotidyl transferase%2C ribonuclease H-like superfamily protein	Chr1	4157633	4158607	184.2	1842
AT1G12250	TL20.3	Chr1	4159139	4160067	154.7	1547
AT1G12270	HOP1 (Hop1)	Chr1	4171901	4173379	320.8	3208
AT1G12290	Disease resistance protein (CC-NBS-LRR class) family	Chr1	4181772	4182693	155	1550
AT1G12294	MICRORNA472A (MIR472A)	Chr1	4181772	4182693	155	1550
AT1G12300	Tetratricopeptide repeat (TPR)-like superfamily protein	Chr1	4185409	4186218	93.4	934
AT1G12310	Calcium-binding EF-hand family protein	Chr1	4186972	4188106	194.6	1946
AT1G12320	ankyrin repeat/KH domain protein (DUF1442)	Chr1	4189406	4190243	108	1080
AT1G12330	cyclin-dependent kinase-like protein	Chr1	4194696	4196231	213.7	2137
AT1G12350	4-PHOSPHO-PANTO-THENOYLCYSTEINE SYNTHETASE (COAB)	Chr1	4198345	4199128	76.4	764
AT1G12360	KEULE (KEU)	Chr1	4200931	4201842	215.5	2155
AT1G12370	PHOTOLYASE 1 (PHR1)	Chr1	4207920	4209075	153.2	1532
AT1G12380	hypothetical protein	Chr1	4215200	4217194	223.6	2236
AT1G12400	Nucleotide excision repair%2C TFIIH%2C subunit TTDA	Chr1	4221742	4222652	65.1	651
AT1G12410	CLP PROTEASE PROTEOLYTIC SUBUNIT 2 (CLP2)	Chr1	4222967	4223809	144.5	1445
AT1G12420	ACT DOMAIN REPEAT 8 (ACR8)	Chr1	4227033	4229116	100.9	1009
AT1G12430	ARMADILLO REPEAT KINESIN 3 (ARK3)	Chr1	4237752	4238808	212	2120
AT1G12440	A20/AN1-like zinc finger family protein	Chr1	4241483	4242515	168.2	1682
AT1G12450	SNARE associated Golgi protein family	Chr1	4244282	4245237	119.5	1195
AT1G12460	Leucine-rich repeat protein kinase family protein	Chr1	4247530	4248530	115	1150
AT1G12470	zinc ion binding protein	Chr1	4250878	4251904	202.3	2023
AT1G12500	Nucleotide-sugar transporter family protein	Chr1	4263641	4265131	190.5	1905
AT1G12520	COPPER CHAPERONE FOR SOD1 (CCS)	Chr1	4267845	4268969	145	1450
AT1G12530	hypothetical protein	Chr1	4270205	4270928	95.2	952
AT1G12550	HYDROXYPYRUVATE REDUCTASE 3 (HPR3)	Chr1	4274493	4275385	296.9	2969
AT1G12580	PHOSPHOENOLPYRUVATE CARBOXYLASE-RELATED KINASE 1 (PEPKR1)	Chr1	4282806	4283827	234.3	2343
AT1G12610	DWARF AND DELAYED FLOWERING 1 (DDF1)	Chr1	4290297	4290933	89.9	899
AT1G12620	Pentatricopeptide repeat (PPR) superfamily protein	Chr1	4296006	4297227	202	2020
AT1G12630	Integrase-type DNA-binding superfamily protein	Chr1	4298645	4299519	222.4	2224
AT1G12640	LYSOPHOSPHOLIPID ACYLTRANSFERASE 1 (LPLAT1)	Chr1	4304646	4306831	279.3	2793
AT1G12650	rRNA biogenesis RRP36-like protein	Chr1	4304646	4306831	147	1470
AT1G12680	PHOSPHOENOLPYRUVATE CARBOXYLASE-RELATED KINASE 2 (PEPKR2)	Chr1	4321892	4323371	195.3	1953
AT1G12700	RNA PROCESSING FACTOR 1 (RPF1)	Chr1	4325697	4326331	69	690
AT1G12710	PHLOEM PROTEIN 2-A12 (PP2-A12)	Chr1	4327326	4328614	239.5	2395
AT1G12730	GPI transamidase subunit PIG-U	Chr1	4334474	4335401	274.1	2741
AT1G12760	Zinc finger%2C C3HC4 type (RING finger) family protein	Chr1	4348477	4349981	131.6	1316
AT1G12775	Pentatricopeptide repeat (PPR) superfamily protein	Chr1	4353874	4354498	49.4	494
AT1G12780	UDP-D-GLUCOSE/UDP-D-GALACTOSE 4-EPIMERASE 1 (UGE1)	Chr1	4356573	4358354	79.5	795
AT1G12790	DNA ligase-like protein	Chr1	4360619	4361256	42.2	422
AT1G12800	S1 DOMAIN-CONTAINING RBP; SDP	Chr1	4364344	4365380	97.3	973
AT1G12805	nucleotide binding protein	Chr1	4366631	4367149	50.1	501
AT1G12810	proline-rich family protein	Chr1	4367269	4368445	99.6	996
AT1G12820	AUXIN SIGNALING F-BOX 3 (AFB3)	Chr1	4370165	4371186	64.7	647
AT1G12830	nucleolin	Chr1	4374073	4375228	143.2	1432
AT1G12840	DE-ETIOLATED 3 (DET3)	Chr1	4375443	4376375	138.9	1389
AT1G12850	Phosphoglycerate mutase family protein	Chr1	4380608	4381713	293.4	2934
AT1G12860	SCREAM 2 (SCRM2)	Chr1	4384662	4385470	42.3	423
AT1G12910	ANTHOCYANIN11 (ATAN11)	Chr1	4395121	4398117	125.5	1255
AT1G12920	EUKARYOTIC RELEASE FACTOR 1-2 (ERF1-2)	Chr1	4395121	4398117	132.7	1327
AT1G12930	ARM repeat superfamily protein	Chr1	4404351	4405684	297.7	2977
AT1G12940	NITRATE TRANSPORTER2.5 (NRT2.5)	Chr1	4416235	4417163	191.7	1917
AT1G12950	ROOT HAIR SPECIFIC 2 (RSH2)	Chr1	4419747	4421261	104.4	1044
AT1G12970	PLANT INTRACELLULAR RAS GROUP-RELATED LRR 3 (PIRL3)	Chr1	4423561	4424654	174.5	1745
AT1G12980	ENHANCER OF SHOOT REGENERATION 1 (ESR1)	Chr1	4429649	4430801	154.3	1543
AT1G12990	beta-1%2C4-N-acetylglucosaminyltransferase family protein	Chr1	4433569	4435049	182.9	1829
AT1G13000	transmembrane protein%2C putative (DUF707)	Chr1	4438646	4439467	68.3	683
AT1G13020	EUKARYOTIC INITIATION FACTOR 4B2 (EIF4B2)	Chr1	4442265	4443768	144.2	1442
AT1G13030	sphere organelles protein-like protein	Chr1	4446514	4448272	108.2	1082
AT1G13040	Pentatricopeptide repeat (PPR-like) superfamily protein	Chr1	4446514	4448272	111.3	1113
AT1G13060	20S PROTEASOME BETA SUBUNIT E1 (PBE1)	Chr1	4452171	4453067	173.3	1733
AT1G13080	"CYTOCHROME P450, FAMILY 71, SUBFAMILY B, POLYPEPTIDE 2" (CYP71B2)	Chr1	4459188	4460005	115.9	1159
AT1G13090	"CYTOCHROME P450, FAMILY 71, SUBFAMILY B, POLYPEPTIDE 28" (CYP71B28)	Chr1	4461740	4462651	218	2180
AT1G13110	"CYTOCHROME P450, FAMILY 71 SUBFAMILY B, POLYPEPTIDE 7" (CYP71B7)	Chr1	4467285	4468744	69.2	692
AT1G13120	nucleoporin GLE1-like protein	Chr1	4472184	4473346	232.8	2328
AT1G13160	ARM repeat superfamily protein	Chr1	4484477	4485610	263.2	2632
AT1G13170	OSBP(OXYSTEROL BINDING PROTEIN)-RELATED PROTEIN 1D (ORP1D)	Chr1	4491337	4492664	202.5	2025
AT1G13180	DISTORTED TRICHOMES 1 (DIS1)	Chr1	4494991	4496133	133.2	1332
AT1G13190	RNA-binding (RRM/RBD/RNP motifs) family protein	Chr1	4498857	4499860	82.1	821
AT1G13195	RING/U-box superfamily protein	Chr1	4502328	4503594	167.4	1674
AT1G13210	AUTOINHIBITED CA2+/ATPASE II (ACA.l)	Chr1	4512233	4513950	162.5	1625
AT1G13220	LITTLE NUCLEI2 (LINC2)	Chr1	4515504	4516507	191.2	1912
AT1G13245	ROTUNDIFOLIA LIKE 17 (RTFL17)	Chr1	4525493	4526194	136.2	1362
AT1G13250	GALACTURONOSYLTRANSFERASE-LIKE 3 (GATL3)	Chr1	4528941	4530143	265.5	2655
AT1G13260	RELATED TO ABI3/VP1 1 (RAV1)	Chr1	4542221	4543478	235.4	2354
AT1G13270	METHIONINE AMINOPEPTIDASE 1B (MAP1C)	Chr1	4544927	4545840	70.2	702
AT1G13280	ALLENE OXIDE CYCLASE 4 (AOC4)	Chr1	4547508	4548665	198.3	1983
AT1G13300	HYPERSENSITIVITY TO LOW PI-ELICITED PRIMARY ROOT SHORTENING 1 (HRS1)	Chr1	4557188	4558087	76.4	764
AT1G13320	PROTEIN PHOSPHATASE 2A SUBUNIT A3 (PP2AA3)	Chr1	4567022	4568314	101.5	1015
AT1G13330	ARABIDOPSIS HOP2 HOMOLOG (AHP2)	Chr1	4569600	4571126	142.9	1429
AT1G13340	Regulator of Vps4 activity in the MVB pathway protein	Chr1	4569600	4571126	142.9	1429
AT1G13350	Protein kinase superfamily protein	Chr1	4575549	4576797	228.7	2287
AT1G13360	hypothetical protein	Chr1	4577014	4577942	220.4	2204
AT1G13380	sodium/hydrogen exchanger (DUF1218)	Chr1	4589454	4590508	134.6	1346
AT1G13390	translocase subunit seca	Chr1	4592491	4593754	172.8	1728
AT1G13410	Tetratricopeptide repeat (TPR)-like superfamily protein	Chr1	4601186	4602031	154.5	1545
AT1G13440	GLYCERALDEHYDE-3-PHOSPHATE DEHYDROGENASE C2 (GAPC2)	Chr1	4608639	4610630	134.6	1346
AT1G13450	GT-1 (GT-1)	Chr1	4614326	4615248	142.5	1425
AT1G13460	TRUE	Chr1	4615835	4616733	85.5	855
AT1G13520	hypothetical protein (DUF1262)	Chr1	4631962	4633278	72.3	723
AT1G13560	AMINOALCOHOLPHOSPHOTRANSFERASE 1 (AAPT1)	Chr1	4641177	4642210	122.5	1225
AT1G13570	F-box/RNI-like superfamily protein	Chr1	4643382	4644391	97.9	979
AT1G13580	LAG1 LONGEVITY ASSURANCE HOMOLOG 3 (LAG13)	Chr1	4646387	4647013	62.1	621
AT1G13630	Tetratricopeptide repeat (TPR)-like superfamily protein	Chr1	4672096	4673201	278	2780
AT1G13640	Phosphatidylinositol 3- and 4-kinase family protein	Chr1	4678639	4679941	146.6	1466
AT1G13690	ATPASE E1 (ATE1)	Chr1	4693211	4694259	235.8	2358
AT1G13700	6-PHOSPHOGLUCONOLACTONASE 1 (PGL1)	Chr1	4695071	4696415	74.4	744
AT1G13730	Nuclear transport factor 2 (NTF2) family protein with RNA binding (RRM-RBD-RNP motifs) domain-containing protein	Chr1	4709872	4710759	117.6	1176
AT1G13740	ABI FIVE BINDING PROTEIN 2 (AFP2)	Chr1	4713649	4715014	220.7	2207
AT1G13770	ROOT UV-B SENSITIVE 3 (RUS3)	Chr1	4721459	4722457	185.6	1856
AT1G13780	F-box/RNI-like/FBD-like domains-containing protein	Chr1	4724476	4725327	132.4	1324
AT1G13800	EMBRYONIC FACTOR 19 (FAC19)	Chr1	4733100	4733905	129.9	1299
AT1G13810	Restriction endonuclease%2C type II-like superfamily protein	Chr1	4733997	4736163	151.2	1512
AT1G13820	alpha/beta-Hydrolases superfamily protein	Chr1	4733997	4736163	98.3	983
AT1G13860	QUASIMODO2 LIKE 1 (QUL1)	Chr1	4746193	4746953	88.4	884
AT1G13870	DEFORMED ROOTS AND LEAVES 1 (DRL1)	Chr1	4747471	4748666	44.1	441
AT1G13880	ELM2	Chr1	4748977	4750353	93.7	937
AT1G13900	PURPLE ACID PHOSPHATASE 2 (PAP2)	Chr1	4754298	4756714	202.6	2026
AT1G13910	Leucine-rich repeat (LRR) family protein	Chr1	4754298	4756714	186.6	1866
AT1G13930	oleosin-B3-like protein	Chr1	4760975	4761789	221.1	2211
AT1G13940	T-box transcription factor%2C putative (DUF863)	Chr1	4765398	4766902	143.9	1439
AT1G13950	EUKARYOTIC ELONGATION FACTOR 5A-1 (ELF5A-1)	Chr1	4773489	4774055	69.2	692
AT1G13960	WRKY DNA-BINDING PROTEIN 4 (WRKY4)	Chr1	4776398	4777822	284.3	2843
AT1G13970	beta-hexosaminidase (DUF1336)	Chr1	4781467	4782542	47.9	479
AT1G13980	GNOM (GN)	Chr1	4788479	4789225	176.1	1761
AT1G13990	plant/protein	Chr1	4794690	4795907	201	2010
AT1G14000	VH1-INTERACTING KINASE (VIK)	Chr1	4797409	4798482	137.8	1378
AT1G14010	emp24/gp25L/p24 family/GOLD family protein	Chr1	4800932	4801888	154.9	1549
AT1G14020	O-fucosyltransferase family protein	Chr1	4802750	4803692	141.8	1418
AT1G14030	LYSINE METHYLTRANSFERASE (LSMT)-LIKE (LSMT-L)	Chr1	4806694	4807564	164.2	1642
AT1G14040	EXS (ERD1/XPR1/SYG1) family protein	Chr1	4810395	4811308	136.9	1369
AT1G14060	GCK domain-containing protein	Chr1	4816941	4818102	232.3	2323
AT1G14130	ATDAO; DAO1; DIOXYGENASE FOR AUXIN OXIDATION 1	Chr1	4836025	4837587	82.8	828
AT1G14140	UNCOUPLING PROTEIN 3 (UCP3)	Chr1	4838803	4839834	236.3	2363
AT1G14170	RNA-binding KH domain-containing protein	Chr1	4845046	4845962	173.3	1733
AT1G14180	RING/U-box superfamily protein	Chr1	4847100	4848053	148.6	1486
AT1G14200	RING/U-box superfamily protein	Chr1	4853973	4855298	225.2	2252
AT1G14210	Ribonuclease T2 family protein	Chr1	4857073	4857930	67.2	672
AT1G14230	GDA1/CD39 nucleoside phosphatase family protein	Chr1	4861150	4862382	268	2680
AT1G14260	RING/FYVE/PHD zinc finger superfamily protein	Chr1	4872786	4874158	194.9	1949
AT1G14270	CAAX amino terminal protease family protein	Chr1	4876522	4877256	121.7	1217
AT1G14290	SPHINGOID BASE HYDROXYLASE 2 (SBH2)	Chr1	4880946	4882055	146.5	1465
AT1G14300	ARM repeat superfamily protein	Chr1	4884125	4884756	52.1	521
AT1G14310	Haloacid dehalogenase-like hydrolase (HAD) superfamily protein	Chr1	4884988	4885621	47.6	476
AT1G14320	SUPPRESSOR OF ACAULIS 52 (SAC52)	Chr1	4888226	4889334	86.8	868
AT1G14330	Galactose oxidase/kelch repeat superfamily protein	Chr1	4890352	4892064	145.3	1453
AT1G14340	RNA-binding (RRM/RBD/RNP motifs) family protein	Chr1	4897297	4898787	119.7	1197
AT1G14345	NAD(P)-linked oxidoreductase superfamily protein	Chr1	4898977	4899900	227.6	2276
AT1G14350	FOUR LIPS (FLP)	Chr1	4907981	4909874	44.2	442
AT1G14360	UDP-GALACTOSE TRANSPORTER 3 (UTR3)	Chr1	4912171	4913199	105.4	1054
AT1G14370	PROTEIN KINASE 2A (APK2A)	Chr1	4915621	4917101	133.7	1337
AT1G14380	IQ-DOMAIN 28 (IQD28)	Chr1	4920811	4921652	96.9	969
AT1G14390	Leucine-rich repeat protein kinase family protein	Chr1	4924239	4925491	46.8	468
AT1G14400	UBIQUITIN CARRIER PROTEIN 1 (UBC1)	Chr1	4927816	4928711	114.7	1147
AT1G14410	WHIRLY 1 (WHY1)	Chr1	4930040	4931023	132.1	1321
AT1G14430	glyoxal oxidase-related protein	Chr1	4934667	4936045	229.8	2298
AT1G14450	NADH dehydrogenase (ubiquinone)s	Chr1	4946686	4947728	257.8	2578
AT1G14460	AAA-type ATPase family protein	Chr1	4951826	4952977	152.2	1522
AT1G14470	Pentatricopeptide repeat (PPR) superfamily protein	Chr1	4954005	4954847	129.4	1294
AT1G14490	AHL28; AT-HOOK MOTIF NUCLEAR LOCALIZED PROTEIN 28	Chr1	4958471	4959428	169.4	1694
AT1G14510	ALFIN-LIKE 7 (AL7)	Chr1	4963319	4964482	270.2	2702
AT1G14530	TOM THREE HOMOLOG 1 (THH1)	Chr1	4972818	4973843	215.8	2158
AT1G14560	Mitochondrial substrate carrier family protein	Chr1	4980561	4981717	184.5	1845
AT1G14570	ATPUX7; PLANT UBX DOMAIN-CONTAINING PROTEIN 7; PUX7	Chr1	4983464	4984469	209.9	2099
AT1G14590	Nucleotide-diphospho-sugar transferase family protein	Chr1	4999866	5000796	236.6	2366
AT1G14600	Homeodomain-like superfamily protein	Chr1	5002371	5003655	126.3	1263
AT1G14610	TWIN 2 (TWN2)	Chr1	5013728	5014595	198.1	1981
AT1G14620	DECOY (DECOY)	Chr1	5015754	5016744	225.9	2259
AT1G14640	SWAP (Suppressor-of-White-APricot)/surp domain-containing protein	Chr1	5023365	5024618	122.7	1227
AT1G14650	SWAP (Suppressor-of-White-APricot)/surp domain-containing protein / ubiquitin family protein	Chr1	5027619	5028950	130.6	1306
AT1G14660	NA+/H+ EXCHANGER 8 (NHX8)	Chr1	5035610	5036623	131.2	1312
AT1G14670	Endomembrane protein 70 protein family	Chr1	5037525	5038535	151.9	1519
AT1G14680	early endosome antigen	Chr1	5040782	5041610	97.1	971
AT1G14685	BASIC PENTACYSTEINE 2 (BPC2)	Chr1	5042503	5043964	79.6	796
AT1G14687	HOMEOBOX PROTEIN 32 (HB32)	Chr1	5047843	5048634	235.2	2352
AT1G14690	MICROTUBULE-ASSOCIATED PROTEIN 65-7 (MAP65-7)	Chr1	5054064	5055322	265.5	2655
AT1G14710	hydroxyproline-rich glycoprotein family protein	Chr1	5063770	5065168	204.5	2045
AT1G14720	XYLOGLUCAN ENDOTRANSGLUCOSYLASE/HYDROLASE 28 (XTH28)	Chr1	5067343	5068616	135.4	1354
AT1G14740	TITANIA 1 (TTA1)	Chr1	5076135	5077828	210.1	2101
AT1G14750	SOLO DANCERS (SDS)	Chr1	5081342	5082648	175.4	1754
AT1G14770	RING/FYVE/PHD zinc finger superfamily protein	Chr1	5088059	5088876	132.5	1325
AT1G14780	MAC/Perforin domain-containing protein	Chr1	5090810	5091654	152.5	1525
AT1G14790	RNA-DEPENDENT RNA POLYMERASE 1 (RDR1)	Chr1	5097067	5098106	167.9	1679
AT1G14810	semialdehyde dehydrogenase family protein	Chr1	5103609	5104831	262.2	2622
AT1G14820	Sec14p-like phosphatidylinositol transfer family protein	Chr1	5106016	5107016	53.8	538
AT1G14830	DYNAMIN-LIKE 1C (DL1C)	Chr1	5110669	5111731	181.9	1819
AT1G14840	MICROTUBULE-ASSOCIATED PROTEINS 70-4 (MAP70-4)	Chr1	5114739	5115583	176.5	1765
AT1G14850	NUCLEOPORIN 155 (NUP155)	Chr1	5122459	5123596	252.3	2523
AT1G14870	PLANT CADMIUM RESISTANCE 2 (PCR2)	Chr1	5128335	5129560	159.1	1591
AT1G14890	Plant invertase/pectin methylesterase inhibitor superfamily protein	Chr1	5136993	5137959	196.9	1969
AT1G14900	HIGH MOBILITY GROUP A (HMGA)	Chr1	5138304	5139446	147.9	1479
AT1G14910	ENTH/ANTH/VHS superfamily protein	Chr1	5142589	5143793	162.1	1621
AT1G14920	GIBBERELLIC ACID INSENSITIVE (GAI)	Chr1	5149152	5151065	266.4	2664
AT1G14970	O-fucosyltransferase family protein	Chr1	5164282	5165121	107.9	1079
AT1G14980	CHAPERONIN 10 (CPN10)	Chr1	5165993	5166746	83.4	834
AT1G15000	SERINE CARBOXYPEPTIDASE-LIKE 50 (scpl50)	Chr1	5168631	5170470	74.8	748
AT1G15020	QUIESCIN-SULFHYDRYL OXIDASE 1 (QSOX1)	Chr1	5175357	5176246	141.7	1417
AT1G15030	hypothetical protein (DUF789)	Chr1	5177497	5178711	144.5	1445
AT1G15040	GLUTAMINE AMIDOTRANSFERASE 1_2.1 (GAT1_2.1)	Chr1	5180232	5181353	80.7	807
AT1G15060	alpha/beta hydrolase family protein	Chr1	5185975	5187054	250.7	2507
AT1G15080	LIPID PHOSPHATE PHOSPHATASE 2 (LPP2)	Chr1	5187568	5188432	125	1250
AT1G15100	RING-H2 FINGER A2A (RHA2A)	Chr1	5193060	5194339	299.3	2993
AT1G15110	PHOSPHATIDYLSERINE SYNTHASE 1 (PSS1)	Chr1	5199142	5200848	232	2320
AT1G15120	Ubiquinol-cytochrome C reductase hinge protein	Chr1	5202847	5203584	95.5	955
AT1G15130	Endosomal targeting BRO1-like domain-containing protein	Chr1	5208517	5210000	182.4	1824
AT1G15140	FAD/NAD(P)-binding oxidoreductase	Chr1	5210953	5212217	161.8	1618
AT1G15165	RING/FYVE/PHD zinc finger superfamily protein	Chr1	5219223	5220232	154.5	1545
AT1G15170	MATE efflux family protein	Chr1	5220501	5221891	192.3	1923
AT1G15190	Fasciclin-like arabinogalactan family protein	Chr1	5226941	5228079	206.3	2063
AT1G15200	protein-protein interaction regulator family protein	Chr1	5230045	5231142	187.5	1875
AT1G15210	ATP-BINDING CASSETTE G35 (ABCG35)	Chr1	5235485	5236832	148.2	1482
AT1G15220	(CCMH)	Chr1	5240710	5241535	60.2	602
AT1G15230	hypothetical protein	Chr1	5242280	5244410	135.6	1356
AT1G15240	phox (PX) domain-containing protein	Chr1	5242280	5244410	129	1290
AT1G15250	Zinc-binding ribosomal protein family protein	Chr1	5248732	5249545	143.5	1435
AT1G15270	Translation machinery associated TMA7	Chr1	5251291	5253216	133.7	1337
AT1G15280	CASC3/Barentsz eIF4AIII binding protein	Chr1	5251291	5253216	154.3	1543
AT1G15290	Tetratricopeptide repeat (TPR)-like superfamily protein	Chr1	5257271	5258273	100.6	1006
AT1G15310	SIGNAL RECOGNITION PARTICLE 54 KDA SUBUNIT (ATHSRP54A)	Chr1	5271204	5272103	143.8	1438
AT1G15330	Cystathionine beta-synthase (CBS) protein	Chr1	5274298	5274940	45.4	454
AT1G15340	METHYL-CPG-BINDING DOMAIN 10 (MBD10)	Chr1	5276660	5277664	122.6	1226
AT1G15350	DUF4050 family protein	Chr1	5279024	5279990	134.3	1343
AT1G15370	SNARE-like superfamily protein	Chr1	5286925	5287962	153.8	1538
AT1G15390	PEPTIDE DEFORMYLASE 1A (PDF1A)	Chr1	5294630	5295629	81	810
AT1G15400	hypothetical protein	Chr1	5295932	5296897	93.8	938
AT1G15420	LANT-SPECIFIC COMPONENT OF THE PRE- RRNA PROCESSING COMPLEX1; PCP1	Chr1	5301889	5303429	92.1	921
AT1G15430	hypothetical protein (DUF1644)	Chr1	5304411	5305499	57.4	574
AT1G15440	PERIODIC TRYPTOPHAN PROTEIN 2 (PWP2)	Chr1	5308384	5309616	228.2	2282
AT1G15470	Transducin/WD40 repeat-like superfamily protein	Chr1	5315437	5316362	211.8	2118
AT1G15480	Tetratricopeptide repeat (TPR)-like superfamily protein	Chr1	5317951	5319010	132	1320
AT1G15490	alpha/beta-Hydrolases superfamily protein	Chr1	5322664	5323866	149.9	1499
AT1G15500	(ATNTT2)	Chr1	5326185	5327523	163.5	1635
AT1G15510	EARLY CHLOROPLAST BIOGENESIS2 (ECB2)	Chr1	5328988	5329718	111.4	1114
AT1G15520	ATP-BINDING CASSETTE G40 (ABCG40)	Chr1	5332140	5333081	131.4	1314
AT1G15530	Concanavalin A-like lectin protein kinase family protein	Chr1	5340105	5342069	221.7	2217
AT1G15570	CYCLIN A2;3 (CYCA2;3)	Chr1	5361939	5363301	108.2	1082
AT1G15580	INDOLE-3-ACETIC ACID INDUCIBLE 5 (IAA5)	Chr1	5364707	5366538	42.6	426
AT1G15660	CENTROMERE PROTEIN C (CENP-C)	Chr1	5380987	5381963	240.7	2407
AT1G15670	Galactose oxidase/kelch repeat superfamily protein	Chr1	5389908	5391276	331	3310
AT1G15690	(AVP1)	Chr1	5398926	5401121	141.6	1416
AT1G15710	prephenate dehydrogenase family protein	Chr1	5404403	5405467	67.2	672
AT1G15720	TRF-LIKE 5 (TRFL5)	Chr1	5405996	5406963	93.2	932
AT1G15730	Cobalamin biosynthesis CobW-like protein	Chr1	5409277	5410057	106.6	1066
AT1G15740	Leucine-rich repeat family protein	Chr1	5410897	5411937	82.9	829
AT1G15750	TOPLESS (TPL)	Chr1	5419388	5421009	201.3	2013
AT1G15760	Sterile alpha motif (SAM) domain-containing protein	Chr1	5425636	5426419	190.7	1907
AT1G15780	MED15_1; MEDIATOR 15_1; NON-RECOGNITION-OF-BTH 4; NRB4	Chr1	5435530	5436661	201.5	2015
AT1G15800	hypothetical protein	Chr1	5442636	5443717	97.1	971
AT1G15810	S15/NS1%2C RNA-binding protein	Chr1	5444435	5445453	75.1	751
AT1G15820	LIGHT HARVESTING COMPLEX PHOTOSYSTEM II SUBUNIT 6 (LHCB6)	Chr1	5446757	5447778	63.6	636
AT1G15830	hypothetical protein	Chr1	5448182	5449574	46.6	466
AT1G15840	hypothetical protein	Chr1	5451514	5452073	53.9	539
AT1G15860	defective in cullin neddylation protein (DUF298)	Chr1	5454811	5455783	140.4	1404
AT1G15880	GOLGI SNARE 11 (GOS11)	Chr1	5459536	5461104	104.2	1042
AT1G15885	hypothetical protein	Chr1	5459536	5461104	78.8	788
AT1G15900	transmembrane protein	Chr1	5464251	5464952	91	910
AT1G15910	FACTOR OF DNA METHYLATION 1 (FDM1)	Chr1	5465407	5466287	47.5	475
AT1G15920	Polynucleotidyl transferase%2C ribonuclease H-like superfamily protein	Chr1	5469483	5470578	68.6	686
AT1G15930	Ribosomal protein L7Ae/L30e/S12e/Gadd45 family protein	Chr1	5471437	5472341	62.3	623
AT1G15940	ATPDS5E; PDS5E	Chr1	5476849	5478226	100.4	1004
AT1G15950	CINNAMOYL COA REDUCTASE 1 (CCR1)	Chr1	5478710	5479370	61.4	614
AT1G15970	DNA glycosylase superfamily protein	Chr1	5487699	5488975	273.3	2733
AT1G15980	PHOTOSYNTHETIC NDH SUBCOMPLEX B 1 (PnsB1)	Chr1	5489200	5489880	98.7	987
AT1G16000	GAG1At protein	Chr1	5494507	5495152	58	580
AT1G16010	MAGNESIUM TRANSPORTER 2 (MGT2)	Chr1	5496647	5497751	128.2	1282
AT1G16020	CALCIUM CAFFEINE ZINC SENSITIVITY 1A; CCZ1A	Chr1	5498080	5499092	122.1	1221
AT1G16030	HEAT SHOCK PROTEIN 70B (Hsp70b)	Chr1	5502959	5505522	177.8	1778
AT1G16040	phosphatidylinositol-glycan biosynthesis class F-like protein	Chr1	5502959	5505522	136.9	1369
AT1G16060	ARIA-INTERACTING DOUBLE AP2 DOMAIN PROTEIN (ADAP)	Chr1	5511038	5511819	171.8	1718
AT1G16080	nuclear protein	Chr1	5514219	5515213	198.4	1984
AT1G16110	WALL ASSOCIATED KINASE-LIKE 6 (WAKL6)	Chr1	5518322	5519320	114.2	1142
AT1G16120	WALL ASSOCIATED KINASE-LIKE 1 (WAKL1)	Chr1	5522601	5523406	71.5	715
AT1G16130	WALL ASSOCIATED KINASE-LIKE 2 (WAKL2)	Chr1	5525482	5526539	128.5	1285
AT1G16170	ephrin-A3 protein	Chr1	5538881	5539861	75.1	751
AT1G16180	Serinc-domain containing serine and sphingolipid biosynthesis protein	Chr1	5540458	5541545	161.5	1615
AT1G16190	RADIATION SENSITIVE23A (RAD23A)	Chr1	5543150	5543767	76.8	768
AT1G16210	coiled-coil protein	Chr1	5546538	5547669	214.9	2149
AT1G16220	Protein phosphatase 2C family protein	Chr1	5548362	5549319	183.6	1836
AT1G16240	SYNTAXIN OF PLANTS 51 (SYP51)	Chr1	5555853	5558052	192.6	1926
AT1G16250	Galactose oxidase/kelch repeat superfamily protein	Chr1	5555853	5558052	218.4	2184
AT1G16270	kinase superfamily with octicosapeptide/Phox/Bem1p domain-containing protein	Chr1	5563006	5564186	167.9	1679
AT1G16280	RNA HELICASE 36 (RH36)	Chr1	5569172	5570642	204.4	2044
AT1G16300	GLYCERALDEHYDE-3-PHOSPHATE DEHYDROGENASE OF PLASTID 2 (GAPCP-2)	Chr1	5573505	5575129	142.4	1424
AT1G16310	Cation efflux family protein	Chr1	5578405	5578937	62	620
AT1G16320	plant/protein (DUF2358)	Chr1	5580778	5581995	191.5	1915
AT1G16340	(ATKDSA2)	Chr1	5589860	5592101	93.8	938
AT1G16350	Aldolase-type TIM barrel family protein	Chr1	5589860	5592101	214.3	2143
AT1G16370	ORGANIC CATION/CARNITINE TRANSPORTER 6 (OCT6)	Chr1	5596761	5597592	42.6	426
AT1G16430	Surfeit locus protein 5 subunit 22 of Mediator complex	Chr1	5614488	5615471	148.6	1486
AT1G16445	S-adenosyl-L-methionine-dependent methyltransferases superfamily protein	Chr1	5617724	5618286	86.5	865
AT1G16460	RHODANESE HOMOLOGUE 2 (RDH2)	Chr1	5621860	5623873	147.6	1476
AT1G16470	PROTEASOME SUBUNIT PAB1 (PAB1)	Chr1	5621860	5623873	226.7	2267
AT1G16480	Tetratricopeptide repeat (TPR)-like superfamily protein	Chr1	5627948	5630226	188	1880
AT1G16489		Chr1	5627948	5630226	70.2	702
AT1G16500	filamentous hemagglutinin transporter	Chr1	5638934	5640134	180.9	1809
AT1G16510	SAUR41; SMALL AUXIN UPREGULATED 41	Chr1	5644490	5645393	215.4	2154
AT1G16520	interactor of constitutive active ROPs protein	Chr1	5648694	5649614	159.9	1599
AT1G16530	ASYMMETRIC LEAVES 2-LIKE 9 (ASL9)	Chr1	5652417	5652972	64.3	643
AT1G16540	ABA DEFICIENT 3 (ABA3)	Chr1	5659338	5660268	144	1440
AT1G16560	Per1-like family protein	Chr1	5668304	5669145	135.2	1352
AT1G16570	UDP-Glycosyltransferase superfamily protein	Chr1	5672725	5674403	130.7	1307
AT1G16610	ARGININE/SERINE-RICH 45 (SR45)	Chr1	5677736	5678902	284.3	2843
AT1G16630	transmembrane protein	Chr1	5683773	5684879	67.6	676
AT1G16635		Chr1	5685628	5686346	57.2	572
AT1G16650	S-adenosyl-L-methionine-dependent methyltransferases superfamily protein	Chr1	5687880	5688708	177.5	1775
AT1G16670	COLD-RESPONSIVE PROTEIN KINASE 1; CRPK1	Chr1	5697228	5698525	239.3	2393
AT1G16690	Enhancer of polycomb-like transcription factor protein	Chr1	5705266	5706545	63.9	639
AT1G16700	Alpha-helical ferredoxin	Chr1	5709557	5710449	145.1	1451
AT1G16710	HISTONE ACETYLTRANSFERASE OF THE CBP FAMILY 12 (HAC12)	Chr1	5713869	5715088	190	1900
AT1G16720	HIGH CHLOROPHYLL FLUORESCENCE PHENOTYPE 173 (HCF173)	Chr1	5722837	5724106	210.1	2101
AT1G16730	UNKNOWN PROTEIN 6 (UP6)	Chr1	5726666	5727425	111.6	1116
AT1G16740	Ribosomal protein L20	Chr1	5727592	5728436	169.1	1691
AT1G16770	hypothetical protein	Chr1	5737936	5739111	122	1220
AT1G16780	(VHP2;2)	Chr1	5743419	5745382	129.8	1298
AT1G16790	ribosomal protein-like protein	Chr1	5743419	5745382	277.2	2772
AT1G16800	P-loop containing nucleoside triphosphate hydrolases superfamily protein	Chr1	5754536	5756097	151.4	1514
AT1G16825	Reticulon family protein	Chr1	5758806	5759323	45.5	455
AT1G16830	Pentatricopeptide repeat (PPR) superfamily protein	Chr1	5760625	5761456	75.6	756
AT1G16840	hypothetical protein	Chr1	5762941	5764013	75	750
AT1G16860	Ubiquitin-specific protease family C19-related protein	Chr1	5767292	5769324	89	890
AT1G16870	mitochondrial 28S ribosomal protein S29-like protein	Chr1	5772404	5773306	124.2	1242
AT1G16880	ACT DOMAIN REPEATS 11 (ACR11)	Chr1	5773597	5774431	90.6	906
AT1G16890	UBIQUITIN-CONJUGATING ENZYME 36 (UBC36)	Chr1	5777579	5778456	104.3	1043
AT1G16900	EMS-MUTAGENIZED BRI1 SUPPRESSOR 3 (EBS3)	Chr1	5781451	5782460	172.5	1725
AT1G16916	transmembrane protein	Chr1	5786433	5788032	44.8	448
AT1G16920	RAB GTPASE HOMOLOG A1B (RABA1b)	Chr1	5786433	5788032	51.6	516
AT1G16970	KU70 HOMOLOG (KU70)	Chr1	5804900	5805892	187.2	1872
AT1G17020	SENESCENCE-RELATED GENE 1 (SRG1)	Chr1	5820165	5821449	85.7	857
AT1G17040	SH2 DOMAIN PROTEIN A (SHA)	Chr1	5824839	5825671	70.3	703
AT1G17050	SOLANESYL DIPHOSPHATE SYNTHASE 2 (SPS2)	Chr1	5828915	5830076	177.3	1773
AT1G17060	CYTOCHROME P450 72C1 (CYP72C1)	Chr1	5834272	5835395	139.5	1395
AT1G17070	GC-rich sequence DNA-binding factor-like protein with Tuftelin interacting domain-containing protein	Chr1	5837505	5838418	135.1	1351
AT1G17080	Ribosomal protein L18ae family	Chr1	5840705	5841655	111	1110
AT1G17090	transmembrane protein	Chr1	5842309	5842893	45.8	458
AT1G17100	SOUL heme-binding family protein	Chr1	5844684	5845569	69.7	697
AT1G17110	UBIQUITIN-SPECIFIC PROTEASE 15 (UBP15)	Chr1	5849938	5850809	102.9	1029
AT1G17120	CATIONIC AMINO ACID TRANSPORTER 8 (CAT8)	Chr1	5851836	5852854	164.9	1649
AT1G17130	coiled-coil protein (DUF572)	Chr1	5854073	5855065	120.7	1207
AT1G17145	RING/U-box superfamily protein	Chr1	5861788	5862745	191.4	1914
AT1G17147	VQ motif-containing protein	Chr1	5863618	5864087	59.7	597
AT1G17160	RBSK; RIBOKINASE	Chr1	5867475	5868659	201.4	2014
AT1G17170	GLUTATHIONE S-TRANSFERASE TAU 24 (GSTU24)	Chr1	5869627	5870952	139.2	1392
AT1G17210	IAP-LIKE PROTEIN 1 (ILP1)	Chr1	5883800	5884842	228	2280
AT1G17220	FU-GAERI1 (FUG1)	Chr1	5885010	5886279	195.6	1956
AT1G17230	Leucine-rich receptor-like protein kinase family protein	Chr1	5890869	5892660	134.8	1348
AT1G17240	RECEPTOR LIKE PROTEIN 2 (RLP2)	Chr1	5897891	5898667	46.4	464
AT1G17250	RECEPTOR LIKE PROTEIN 3 (RLP3)	Chr1	5901498	5903455	92.8	928
AT1G17255		Chr1	5901498	5903455	92.8	928
AT1G17270	O-fucosyltransferase family protein	Chr1	5910660	5911807	268.6	2686
AT1G17280	UBIQUITIN-CONJUGATING ENZYME 34 (UBC34)	Chr1	5919371	5920045	90.7	907
AT1G17290	ALANINE AMINOTRANSFERAS (AlaAT1)	Chr1	5922704	5925046	108	1080
AT1G17330	Metal-dependent phosphohydrolase	Chr1	5929744	5930752	229.3	2293
AT1G17340	SAC5; SUPPRESSOR OF ACTIN 5	Chr1	5933791	5934760	185.5	1855
AT1G17345	SAUR-like auxin-responsive protein family	Chr1	5940452	5941024	40.1	401
AT1G17350	NADH:ubiquinone oxidoreductase intermediate-associated protein 30	Chr1	5941692	5942631	190.7	1907
AT1G17360	LOW protein: protein phosphatase 1 regulatory subunit-like protein	Chr1	5946540	5947795	229.1	2291
AT1G17370	OLIGOURIDYLATE BINDING PROTEIN 1B (UBP1B)	Chr1	5953956	5955053	214.6	2146
AT1G17380	JASMONATE-ZIM-DOMAIN PROTEIN 5 (JAZ5)	Chr1	5955576	5957260	91.6	916
AT1G17410	Nucleoside diphosphate kinase family protein	Chr1	5969010	5970059	245.6	2456
AT1G17420	LIPOXYGENASE 3 (LOX3)	Chr1	5977382	5979001	128.6	1286
AT1G17430	alpha/beta-Hydrolases superfamily protein	Chr1	5982261	5983164	114.8	1148
AT1G17440	ENHANCED ETHYLENE RESPONSE 4 (EER4)	Chr1	5986424	5987819	248.5	2485
AT1G17450	B-block binding subunit of TFIIIC	Chr1	5995775	5997961	240.1	2401
AT1G17455	ELF4-LIKE 4 (ELF4-L4)	Chr1	5995775	5997961	134.2	1342
AT1G17460	TRF-LIKE 3 (TRFL3)	Chr1	5998804	5999307	49.6	496
AT1G17470	DEVELOPMENTALLY REGULATED G-PROTEIN 1 (DRG1)	Chr1	6002870	6003771	107.1	1071
AT1G17480	IQ-DOMAIN 7 (IQD7)	Chr1	6007415	6009343	111.1	1111
AT1G17490	epidermal patterning factor-like protein	Chr1	6007415	6009343	133.2	1332
AT1G17510	hypothetical protein	Chr1	6023630	6024339	104.3	1043
AT1G17520	Homeodomain-like/winged-helix DNA-binding family protein	Chr1	6026678	6028578	145.2	1452
AT1G17530	TRANSLOCASE OF INNER MITOCHONDRIAL MEMBRANE 23 (TIM23-1)	Chr1	6026678	6028578	209.9	2099
AT1G17550	HOMOLOGY TO ABI2 (HAB2)	Chr1	6034302	6035637	177.9	1779
AT1G17560	HUELLENLOS (HLL)	Chr1	6037921	6038682	43	430
AT1G17580	MYOSIN 1 (MYA1)	Chr1	6039138	6040048	169	1690
AT1G17590	"NUCLEAR FACTOR Y, SUBUNIT A8" (NF-YA8)	Chr1	6051680	6054225	122.9	1229
AT1G17600	Disease resistance protein (TIR-NBS-LRR class) family	Chr1	6051680	6054225	91.1	911
AT1G17620	Late embryogenesis abundant (LEA) hydroxyproline-rich glycoprotein family	Chr1	6062098	6063266	258.9	2589
AT1G17630	CELL WALL MAINTAINER 1; CWM1	Chr1	6064440	6065410	173.8	1738
AT1G17640	RNA-binding (RRM/RBD/RNP motifs) family protein	Chr1	6068556	6069275	84.6	846
AT1G17650	GLYOXYLATE REDUCTASE 2 (GLYR2)	Chr1	6071390	6072134	78.5	785
AT1G17665	CA-responsive protein	Chr1	6073502	6074587	189	1890
AT1G17680	tetratricopeptide repeat (TPR)-containing protein	Chr1	6076024	6076974	133.5	1335
AT1G17690	NUCLEOLAR FACTOR 1 (NOF1)	Chr1	6087377	6088443	257.1	2571
AT1G17720	(ATB BETA)	Chr1	6097335	6098366	130.8	1308
AT1G17730	VACUOLAR PROTEIN SORTING 46.1 (VPS46.1)	Chr1	6099052	6100006	159.5	1595
AT1G17744	hypothetical protein	Chr1	6101054	6101838	135.8	1358
AT1G17745	3-PHOSPHOGLYCERATE DEHYDROGENASE (PGDH)	Chr1	6101054	6101838	135.8	1358
AT1G17750	PEP1 RECEPTOR 2 (PEPR2)	Chr1	6106384	6108700	119.8	1198
AT1G17760	(CSTF77)	Chr1	6115688	6116706	215.8	2158
AT1G17780	transmembrane protein	Chr1	6123590	6124948	149.6	1496
AT1G17790	DNA-binding bromodomain-containing protein	Chr1	6126293	6127568	204.2	2042
AT1G17820	testis-expressed sequence 2-like protein (DUF2404)	Chr1	6134348	6135373	217.1	2171
AT1G17830	hypothetical protein (DUF789)	Chr1	6136636	6138359	87.9	879
AT1G17840	ATP-BINDING CASSETTE G11 (ABCG11)	Chr1	6142708	6143731	57.5	575
AT1G17850	Rhodanese/Cell cycle control phosphatase superfamily protein	Chr1	6147978	6148859	91.4	914
AT1G17860	Kunitz family trypsin and protease inhibitor protein	Chr1	6149306	6150233	84.8	848
AT1G17880	BASIC TRANSCRIPTION FACTOR 3 (BTF3)	Chr1	6152728	6154003	130	1300
AT1G17890	(GER2)	Chr1	6154781	6155773	176.4	1764
AT1G17930	MAIN; MAINTENANCE OF MERISTEMS	Chr1	6167987	6168888	155.3	1553
AT1G17940	Endosomal targeting BRO1-like domain-containing protein	Chr1	6172039	6173240	108.6	1086
AT1G17960	Threonyl-tRNA synthetase	Chr1	6182693	6183816	119.2	1192
AT1G17970	RING/U-box superfamily protein	Chr1	6184769	6185824	286.6	2866
AT1G17980	POLY(A) POLYMERASE 1 (PAPS1)	Chr1	6190813	6191864	165.2	1652
AT1G18000	Major facilitator superfamily protein	Chr1	6195013	6196163	130.4	1304
AT1G18010	Major facilitator superfamily protein	Chr1	6199846	6201031	132.4	1324
AT1G18030	Protein phosphatase 2C family protein	Chr1	6204218	6205111	141.3	1413
AT1G18040	CYCLIN-DEPENDENT KINASE D1;3 (CDKD1;3)	Chr1	6208703	6209615	143	1430
AT1G18060	microbial collagenase	Chr1	6212489	6213397	43.8	438
AT1G18070	Translation elongation factor EF1A/initiation factor IF2gamma family protein	Chr1	6217418	6218365	155.9	1559
AT1G18080	(ATARCA)	Chr1	6222181	6223625	161.3	1613
AT1G18090	5'-3' exonuclease family protein	Chr1	6226975	6227735	70	700
AT1G18100	(E12A11)	Chr1	6226975	6227735	70	700
AT1G18140	LACCASE 1 (LAC1)	Chr1	6238887	6240254	311.2	3112
AT1G18150	(ATMPK8)	Chr1	6246645	6247766	157.1	1571
AT1G18160	Protein kinase superfamily protein	Chr1	6248709	6249945	196.1	1961
AT1G18170	FKBP-like peptidyl-prolyl cis-trans isomerase family protein	Chr1	6254090	6254830	185.1	1851
AT1G18180	3-oxo-5-alpha-steroid 4-dehydrogenase (DUF1295)	Chr1	6255688	6256305	53.3	533
AT1G18190	GOLGIN CANDIDATE 2 (GC2)	Chr1	6260570	6261548	214.3	2143
AT1G18250	(ATLP-1)	Chr1	6277008	6278010	162.5	1625
AT1G18260	EMS-MUTAGENIZED BRI1 SUPPRESSOR 5 (EBS5)	Chr1	6280647	6283138	193.8	1938
AT1G18265	zein-binding protein (Protein of unknown function%2C DUF593)	Chr1	6280647	6283138	80.9	809
AT1G18270	ketose-bisphosphate aldolase class-II family protein	Chr1	6293222	6293994	79.7	797
AT1G18280	GLYCOSYLPHOSPHATIDYLINOSITOL-ANCHORED LIPID PROTEIN TRANSFER 3; LTPG3	Chr1	6294141	6295209	150	1500
AT1G18290	DUF4228 domain protein	Chr1	6297361	6298070	132	1320
AT1G18300	NUDIX HYDROLASE HOMOLOG 4 (NUDT4)	Chr1	6299703	6300830	96.2	962
AT1G18320	Mitochondrial import inner membrane translocase subunit Tim17/Tim22/Tim23 family protein	Chr1	6304192	6304996	135.6	1356
AT1G18330	EARLY-PHYTOCHROME-RESPONSIVE1 (EPR1)	Chr1	6307068	6307981	99	990
AT1G18335	Acyl-CoA N-acyltransferases (NAT) superfamily protein	Chr1	6310736	6311369	87	870
AT1G18340	basal transcription factor complex subunit-like protein	Chr1	6313149	6314015	157.5	1575
AT1G18350	MAP KINASE KINASE 7 (MKK7)	Chr1	6315672	6316683	90.3	903
AT1G18360	alpha/beta-Hydrolases superfamily protein	Chr1	6318487	6319483	196.2	1962
AT1G18390	LEAF RUST 10 DISEASE-RESISTANCE LOCUS RECEPTOR- LIKE PROTEIN KINASE-LIKE 1.1; LRK10L1.1	Chr1	6325769	6326821	198.2	1982
AT1G18415		Chr1	6344760	6346714	125.7	1257
AT1G18420	aluminum activated malate transporter family protein	Chr1	6344760	6346714	125.7	1257
AT1G18440	Peptidyl-tRNA hydrolase family protein	Chr1	6344760	6346714	135.4	1354
AT1G18450	ACTIN-RELATED PROTEIN 4 (ARP4)	Chr1	6348025	6348871	132.6	1326
AT1G18460	alpha/beta-Hydrolases superfamily protein	Chr1	6352377	6353460	133.8	1338
AT1G18470	Transmembrane Fragile-X-F-associated protein	Chr1	6359121	6360243	137.4	1374
AT1G18480	SHEWENELLA-LIKE PROTEIN PHOSPHATASE 2 (SLP2)	Chr1	6361525	6362936	170.8	1708
AT1G18490	PCO3; PLANT CYSTEINE OXIDASE 3	Chr1	6366981	6367728	98	980
AT1G18500	METHYLTHIOALKYLMALATE SYNTHASE-LIKE 4 (MAML-4)	Chr1	6369169	6370607	246.9	2469
AT1G18540	Ribosomal protein L6 family protein	Chr1	6377340	6378724	302.5	3025
AT1G18550	ATP binding microtubule motor family protein	Chr1	6383565	6384567	181	1810
AT1G18560	BED zinc finger and hAT dimerization domain-containing protein	Chr1	6385225	6386381	107.1	1071
AT1G18570	MYB DOMAIN PROTEIN 51 (MYB51)	Chr1	6389405	6391025	109.4	1094
AT1G18580	GALACTURONOSYLTRANSFERASE 11 (GAUT11)	Chr1	6395804	6396915	168.4	1684
AT1G18590	SULFOTRANSFERASE 17 (SOT17)	Chr1	6398664	6399434	60.5	605
AT1G18600	RHOMBOID-LIKE PROTEIN 12 (RBL12)	Chr1	6400258	6401430	165.4	1654
AT1G18610	Galactose oxidase/kelch repeat superfamily protein	Chr1	6405549	6406622	228.1	2281
AT1G18630	GLYCINE-RICH RNA-BINDING PROTEIN 6 (GR-RBP6)	Chr1	6413706	6415489	107.8	1078
AT1G18640	3-PHOSPHOSERINE PHOSPHATASE (PSP)	Chr1	6418004	6418737	65.7	657
AT1G18650	PLASMODESMATA CALLOSE-BINDING PROTEIN 3 (PDCB3)	Chr1	6419612	6420687	107.8	1078
AT1G18660	zinc finger (C3HC4-type RING finger) family protein	Chr1	6421068	6421915	118.2	1182
AT1G18670	IMPAIRED IN BABA-INDUCED STERILITY 1 (IBS1)	Chr1	6429400	6430980	184.8	1848
AT1G18680	HNH endonuclease domain-containing protein	Chr1	6432648	6434123	94.5	945
AT1G18700	DNAJ heat shock N-terminal domain-containing protein	Chr1	6437433	6438375	185	1850
AT1G18720	ER membrane protein%2C putative (DUF962)	Chr1	6458602	6459847	249.4	2494
AT1G18740	ROH1%2C putative (DUF793)	Chr1	6464009	6466513	157.1	1571
AT1G18745		Chr1	6464009	6466513	69.2	692
AT1G18750	AGAMOUS-LIKE 65 (AGL65)	Chr1	6466612	6467569	102.8	1028
AT1G18773	acyl thioesterase-like protein	Chr1	6474679	6475390	171.3	1713
AT1G18800	NAP1-RELATED PROTEIN 2 (NRP2)	Chr1	6482683	6483741	207.8	2078
AT1G18830	Transducin/WD40 repeat-like superfamily protein	Chr1	6489163	6492113	171.1	1711
AT1G18840	IQ-DOMAIN 30 (IQD30)	Chr1	6503735	6506530	64.7	647
AT1G18850	hypothetical protein	Chr1	6503735	6506530	226.7	2267
AT1G18890	CALCIUM-DEPENDENT PROTEIN KINASE 1 (CDPK1)	Chr1	6524578	6526002	258.7	2587
AT1G18900	Pentatricopeptide repeat (PPR) superfamily protein	Chr1	6528912	6529748	152.6	1526
AT1G18910	zinc ion binding protein	Chr1	6537230	6538226	267.1	2671
AT1G18940	Nodulin-like / Major Facilitator Superfamily protein	Chr1	6543676	6544436	176.1	1761
AT1G18950	DDT domain superfamily	Chr1	6546146	6547473	301.3	3013
AT1G18980	RmlC-like cupins superfamily protein	Chr1	6557353	6558053	119.6	1196
AT1G19000	Homeodomain-like superfamily protein	Chr1	6561594	6562860	209.8	2098
AT1G19010	hypothetical protein	Chr1	6565534	6566226	83.8	838
AT1G19020	CDP-diacylglycerol-glycerol-3-phosphate 3-phosphatidyltransferase	Chr1	6567975	6569727	57	570
AT1G19025	DNA repair metallo-beta-lactamase family protein	Chr1	6567975	6569727	156.3	1563
AT1G19050	RESPONSE REGULATOR 7 (ARR7)	Chr1	6578009	6579341	137.6	1376
AT1G19070	F-box family protein	Chr1	6584093	6585144	210	2100
AT1G19080	TITAN 10 (TTN10)	Chr1	6584093	6585144	210	2100
AT1G19100	DEFECTIVE IN MERISTEM SILENCING 11 (DMS11)	Chr1	6594771	6595920	271	2710
AT1G19110	inter-alpha-trypsin inhibitor heavy chain-like protein	Chr1	6601965	6603266	300.7	3007
AT1G19120	Small nuclear ribonucleoprotein family protein	Chr1	6608069	6608838	69.2	692
AT1G19130	RmlC-like jelly roll fold protein	Chr1	6609683	6610660	98.3	983
AT1G19140	ubiquinone biosynthesis COQ9-like protein	Chr1	6611699	6612545	127.2	1272
AT1G19170	Pectin lyase-like superfamily protein	Chr1	6616588	6617743	207.1	2071
AT1G19180	JASMONATE-ZIM-DOMAIN PROTEIN 1 (JAZ1)	Chr1	6622207	6623485	90.6	906
AT1G19190	alpha/beta-Hydrolases superfamily protein	Chr1	6623785	6624856	121.4	1214
AT1G19200	cyclin-dependent kinase%2C putative (DUF581)	Chr1	6625294	6625978	70.3	703
AT1G19210	Integrase-type DNA-binding superfamily protein	Chr1	6626970	6627558	63.2	632
AT1G19220	AUXIN RESPONSE FACTOR 19 (ARF19)	Chr1	6631097	6633085	190	1900
AT1G19230	Riboflavin synthase-like superfamily protein	Chr1	6643915	6645090	254	2540
AT1G19240	transmembrane protein	Chr1	6649711	6650586	222.4	2224
AT1G19270	DA1 (DA1)	Chr1	6662523	6663737	181.1	1811
AT1G19290	Pentatricopeptide repeat (PPR) superfamily protein	Chr1	6666004	6667006	228.7	2287
AT1G19300	PARVUS (PARVUS)	Chr1	6671340	6672663	304	3040
AT1G19310	RING/U-box superfamily protein	Chr1	6676558	6677687	73.8	738
AT1G19320	Pathogenesis-related thaumatin superfamily protein	Chr1	6679490	6680042	41.6	416
AT1G19330	histone deacetylase complex subunit	Chr1	6682525	6683601	180.6	1806
AT1G19340	Methyltransferase MT-A70 family protein	Chr1	6684678	6685551	99.5	995
AT1G19350	BRI1-EMS-SUPPRESSOR 1 (BES1)	Chr1	6688667	6689908	134.2	1342
AT1G19360	REDUCED RESIDUAL ARABINOSE 3 (RRA3)	Chr1	6691553	6692470	118.5	1185
AT1G19370	membrane protein	Chr1	6693939	6694977	126.6	1266
AT1G19380	sugar%2C putative (DUF1195)	Chr1	6697873	6698698	130.5	1305
AT1G19394	hypothetical protein	Chr1	6709704	6710970	119.1	1191
AT1G19396	hypothetical protein	Chr1	6709704	6710970	119.1	1191
AT1G19400	Erythronate-4-phosphate dehydrogenase family protein	Chr1	6712966	6714482	139.2	1392
AT1G19430	S-adenosyl-L-methionine-dependent methyltransferases superfamily protein	Chr1	6726701	6727995	175.2	1752
AT1G19440	3-KETOACYL-COA SYNTHASE 4 (KCS4)	Chr1	6728777	6729952	175.5	1755
AT1G19450	Major facilitator superfamily protein	Chr1	6733818	6735015	157.8	1578
AT1G19460	Galactose oxidase/kelch repeat superfamily protein	Chr1	6738497	6739161	56.5	565
AT1G19480	DNA glycosylase superfamily protein	Chr1	6744321	6745646	246.7	2467
AT1G19485	Transducin/WD40 repeat-like superfamily protein	Chr1	6746735	6747635	140.5	1405
AT1G19490	Basic-leucine zipper (bZIP) transcription factor family protein	Chr1	6753123	6754181	254	2540
AT1G19520	NUCLEAR FUSION DEFECTIVE 5 (NFD5)	Chr1	6759866	6761293	207.4	2074
AT1G19530	DNA polymerase epsilon catalytic subunit A	Chr1	6763963	6764912	59.8	598
AT1G19540	NmrA-like negative transcriptional regulator family protein	Chr1	6765602	6766824	84.2	842
AT1G19570	DEHYDROASCORBATE REDUCTASE (DHAR1)	Chr1	6773542	6775626	113.4	1134
AT1G19580	GAMMA CARBONIC ANHYDRASE 1 (GAMMA CA1)	Chr1	6773542	6775626	168	1680
AT1G19600	pfkB-like carbohydrate kinase family protein	Chr1	6778893	6780147	198.6	1986
AT1G19620	transmembrane protein	Chr1	6784139	6785127	148.4	1484
AT1G19630	"CYTOCHROME P450, FAMILY 722, SUBFAMILY A, POLYPEPTIDE 1" (CYP722A1)	Chr1	6787350	6788133	60.3	603
AT1G19650	Sec14p-like phosphatidylinositol transfer family protein	Chr1	6798835	6799779	161.8	1618
AT1G19660	ATBBD2; BBD2; BIFUNCTIONAL NUCLEASE IN BASAL DEFENSE RESPONSE 2	Chr1	6801881	6802595	70.7	707
AT1G19680	RING/U-box superfamily protein	Chr1	6805417	6806467	167.1	1671
AT1G19690	NAD(P)-binding Rossmann-fold superfamily protein	Chr1	6808899	6809661	104.7	1047
AT1G19700	BEL1-LIKE HOMEODOMAIN 10 (BEL10)	Chr1	6811228	6812448	92.3	923
AT1G19710	UDP-Glycosyltransferase superfamily protein	Chr1	6814696	6815924	208	2080
AT1G19720	Pentatricopeptide repeat (PPR-like) superfamily protein	Chr1	6822000	6822814	100.2	1002
AT1G19740	ATP-dependent protease La (LON) domain protein	Chr1	6824250	6825651	179.4	1794
AT1G19750	Transducin/WD40 repeat-like superfamily protein	Chr1	6826886	6827482	43.7	437
AT1G19770	PURINE PERMEASE 14 (PUP14)	Chr1	6832313	6834112	257.8	2578
AT1G19790	SHI-RELATED SEQUENCE 7 (SRS7)	Chr1	6838356	6840276	123.2	1232
AT1G19800	ATP-BINDING CASSETTE I14 (ABCI14)	Chr1	6846254	6847208	188.6	1886
AT1G19835	filament-like protein (DUF869)	Chr1	6858104	6860450	209.3	2093
AT1G19840	SAUR53; SMALL AUXIN UPREGULATED RNA 53	Chr1	6872345	6873489	238.8	2388
AT1G19850	MONOPTEROS (MP)	Chr1	6886688	6888887	185.5	1855
AT1G19860	Zinc finger C-x8-C-x5-C-x3-H type family protein	Chr1	6893886	6894792	152.8	1528
AT1G19870	IQ-DOMAIN 32 (iqd32)	Chr1	6897680	6898722	142	1420
AT1G19880	Regulator of chromosome condensation (RCC1) family protein	Chr1	6902887	6904189	281.6	2816
AT1G19910	(AVA-P2)	Chr1	6913140	6914278	232.3	2323
AT1G19920	(APS2)	Chr1	6915424	6916856	215.9	2159
AT1G19950	HVA22-LIKE PROTEIN H (ATHVA22H) (HVA22H)	Chr1	6924087	6924980	160.5	1605
AT1G19970	ER lumen protein retaining receptor family protein	Chr1	6932079	6934037	171	1710
AT1G19980	cytomatrix protein-like protein	Chr1	6932079	6934037	137.1	1371
AT1G19990	nucleolin	Chr1	6935158	6936102	120.4	1204
AT1G20030	Pathogenesis-related thaumatin superfamily protein	Chr1	6945673	6946489	180.4	1804
AT1G20050	HYDRA1 (HYD1)	Chr1	6948979	6950095	194.7	1947
AT1G20060	ATP binding microtubule motor family protein	Chr1	6955351	6957165	182	1820
AT1G20070	hypothetical protein	Chr1	6958155	6958878	106.8	1068
AT1G20090	RHO-RELATED PROTEIN FROM PLANTS 2 (ROP2)	Chr1	6966929	6967997	87.5	875
AT1G20100	DNA ligase-like protein	Chr1	6969371	6970894	56.3	563
AT1G20110	FREE1; FYVE DOMAIN PROTEIN REQUIRED FOR ENDOSOMAL SORTING 1; FYVE-DOMAIN PROTEIN 1; FYVE1	Chr1	6971485	6972982	115.9	1159
AT1G20140	SKP1-LIKE 4 (SK4)	Chr1	6986231	6987708	286.6	2866
AT1G20200	EMBRYO DEFECTIVE 2719 (emb2719)	Chr1	7003381	7004437	217.6	2176
AT1G20220	Alba DNA/RNA-binding protein	Chr1	7006856	7007632	108.6	1086
AT1G20225	Thioredoxin superfamily protein	Chr1	7008641	7010476	124	1240
AT1G20230	Pentatricopeptide repeat (PPR) superfamily protein	Chr1	7008641	7010476	154.2	1542
AT1G20260	V-ATPASE B SUBUNIT 3 (VAB3)	Chr1	7016643	7017436	207.8	2078
AT1G20270	2-oxoglutarate (2OG) and Fe(II)-dependent oxygenase superfamily protein	Chr1	7021622	7023202	250.2	2502
AT1G20300	Pentatricopeptide repeat (PPR) superfamily protein	Chr1	7029526	7030681	255.6	2556
AT1G20310	syringolide-induced protein	Chr1	7032172	7033090	196.7	1967
AT1G20330	STEROL METHYLTRANSFERASE 2 (SMT2)	Chr1	7038714	7040168	203.6	2036
AT1G20340	DNA-DAMAGE-REPAIR/TOLERATION PROTEIN 112 (DRT112)	Chr1	7042660	7043398	140.6	1406
AT1G20350	TRANSLOCASE INNER MEMBRANE SUBUNIT 17-1 (TIM17-1)	Chr1	7043673	7044425	102.4	1024
AT1G20370	Pseudouridine synthase family protein	Chr1	7052684	7053824	330.2	3302
AT1G20375	MICRORNA394A (MIR394A)	Chr1	7057937	7058692	64	640
AT1G20380	Prolyl oligopeptidase family protein	Chr1	7061499	7062916	143.8	1438
AT1G20410	Pseudouridine synthase family protein	Chr1	7081640	7082647	211.6	2116
AT1G20430	hypothetical protein	Chr1	7083023	7083960	187.2	1872
AT1G20450	EARLY RESPONSIVE TO DEHYDRATION 10 (ERD10)	Chr1	7088210	7089250	108.5	1085
AT1G20460	NADH-ubiquinone oxidoreductase chain	Chr1	7091182	7092008	159.9	1599
AT1G20480	AMP-dependent synthetase and ligase family protein	Chr1	7095799	7097193	177.9	1779
AT1G20490	AMP-dependent synthetase and ligase family protein	Chr1	7098545	7099667	131.7	1317
AT1G20510	OPC-8:0 COA LIGASE1 (OPCL1)	Chr1	7104416	7106008	186.9	1869
AT1G20530	girdin (DUF630 and DUF632)	Chr1	7109789	7110399	58.4	584
AT1G20540	Transducin/WD40 repeat-like superfamily protein	Chr1	7112463	7113485	181	1810
AT1G20550	O-fucosyltransferase family protein	Chr1	7117323	7118234	124.6	1246
AT1G20560	ACYL ACTIVATING ENZYME 1 (AAE1)	Chr1	7120508	7121955	175.1	1751
AT1G20570	Spc97 / Spc98 family of spindle pole body (SBP) component	Chr1	7126064	7126690	51.6	516
AT1G20575	DOLICHOL PHOSPHATE MANNOSE SYNTHASE 1 (DPMS1)	Chr1	7127945	7129696	128.6	1286
AT1G20580	Small nuclear ribonucleoprotein family protein	Chr1	7127945	7129696	182.2	1822
AT1G20610	CYCLIN B2;3 (CYCB2;3)	Chr1	7136830	7137800	69.2	692
AT1G20620	CATALASE 3 (CAT3)	Chr1	7143958	7146186	135.2	1352
AT1G20630	CATALASE 1 (CAT1)	Chr1	7146696	7148028	50.2	502
AT1G20640	NIN-LIKE PROTEIN 4; NLP4	Chr1	7154405	7155584	134.4	1344
AT1G20650	ALTERED SEED GERMINATION 5 (ASG5)	Chr1	7159448	7160519	145.3	1453
AT1G20670	DNA-binding bromodomain-containing protein	Chr1	7166945	7168116	281.1	2811
AT1G20690	SWI-SNF-related chromatin binding protein	Chr1	7174956	7176419	73.9	739
AT1G20691		Chr1	7174956	7176419	73.9	739
AT1G20693	HIGH MOBILITY GROUP B2 (HMGB2)	Chr1	7176775	7177790	107.8	1078
AT1G20696	HIGH MOBILITY GROUP B3 (HMGB3)	Chr1	7179467	7180603	109.1	1091
AT1G20700	WUSCHEL RELATED HOMEOBOX 14 (WOX14)	Chr1	7182506	7183169	50.4	504
AT1G20720	RAD3-like DNA-binding helicase protein	Chr1	7192156	7192990	220.2	2202
AT1G20760	Calcium-binding EF hand family protein	Chr1	7209248	7210486	259.4	2594
AT1G20770	coiled-coil protein	Chr1	7215986	7216821	125	1250
AT1G20780	SENESCENCE-ASSOCIATED E3 UBIQUITIN LIGASE 1 (SAUL1)	Chr1	7216978	7218344	207.9	2079
AT1G20810	FKBP-like peptidyl-prolyl cis-trans isomerase family protein	Chr1	7231829	7233020	254	2540
AT1G20816	outer envelope pore-like protein	Chr1	7233620	7234387	103.3	1033
AT1G20823	ATATL80	Chr1	7238666	7239578	295.7	2957
AT1G20830	MULTIPLE CHLOROPLAST DIVISION SITE 1 (MCD1)	Chr1	7242842	7243720	159.3	1593
AT1G20840	TONOPLAST MONOSACCHARIDE TRANSPORTER1 (TMT1)	Chr1	7247253	7248352	99.5	995
AT1G20880	RNA-binding (RRM/RBD/RNP motifs) family protein	Chr1	7264101	7265506	150.7	1507
AT1G20890	caveolin-1 protein	Chr1	7266590	7267411	167.2	1672
AT1G20900	ESCAROLA (ESC)	Chr1	7272524	7274140	291.4	2914
AT1G20910	ARID/BRIGHT DNA-binding domain-containing protein	Chr1	7280302	7281287	246.3	2463
AT1G20920	P-loop containing nucleoside triphosphate hydrolases superfamily protein	Chr1	7284980	7286611	231	2310
AT1G20930	CYCLIN-DEPENDENT KINASE B2;2 (CDKB2;2)	Chr1	7293951	7294876	218	2180
AT1G20950	Phosphofructokinase family protein	Chr1	7300313	7301549	278	2780
AT1G20960	EMBRYO DEFECTIVE 1507 (emb1507)	Chr1	7308737	7310329	208.3	2083
AT1G20970	calponin-like domain protein	Chr1	7313923	7315931	185.1	1851
AT1G20980	SQUAMOSA PROMOTER BINDING PROTEIN-LIKE 14 (SPL14)	Chr1	7324512	7326264	288.3	2883
AT1G21000	PLATZ transcription factor family protein	Chr1	7337684	7339091	256.3	2563
AT1G21010	poly polymerase	Chr1	7346070	7347109	273.3	2733
AT1G21050	MIZU-KUSSEI-like protein (Protein of unknown function%2C DUF617)	Chr1	7366742	7367751	264	2640
AT1G21060	Serine/Threonine-kinase%2C putative (Protein of unknown function%2C DUF547)	Chr1	7371630	7372702	76.7	767
AT1G21065	secondary thiamine-phosphate synthase enzyme	Chr1	7374194	7375023	99.4	994
AT1G21070	UDP-RHA/UDP-GAL TRANSPORTER 2; URGT2	Chr1	7377172	7378213	170	1700
AT1G21080	DNAJ heat shock N-terminal domain-containing protein	Chr1	7381591	7382434	132.5	1325
AT1G21090	Cupredoxin superfamily protein	Chr1	7384702	7386234	54.8	548
AT1G21110	INDOLE GLUCOSINOLATE O-METHYLTRANSFERASE 3 (IGMT3)	Chr1	7390607	7391469	52.4	524
AT1G21120	INDOLE GLUCOSINOLATE O-METHYLTRANSFERASE 2 (IGMT2)	Chr1	7395260	7396759	116.5	1165
AT1G21130	INDOLE GLUCOSINOLATE O-METHYLTRANSFERASE 4 (IGMT4)	Chr1	7399153	7400604	102.8	1028
AT1G21140	Vacuolar iron transporter (VIT) family protein	Chr1	7404452	7405002	42.6	426
AT1G21150	Mitochondrial transcription termination factor family protein	Chr1	7407010	7407892	81.2	812
AT1G21160	eukaryotic translation initiation factor 2 (eIF-2) family protein	Chr1	7411760	7413796	131.8	1318
AT1G21170	(SEC5B)	Chr1	7411760	7413796	269.5	2695
AT1G21190	LSM3A; SM-LIKE 3A	Chr1	7420007	7422260	218.8	2188
AT1G21200	sequence-specific DNA binding transcription factor	Chr1	7420007	7422260	193.1	1931
AT1G21280	Copia-like polyprotein/retrotransposon	Chr1	7447430	7448573	296.5	2965
AT1G21320	nucleic acid/nucleotide binding protein	Chr1	7462320	7463816	54.7	547
AT1G21326	VQ motif-containing protein	Chr1	7468914	7469810	122	1220
AT1G21350	Thioredoxin superfamily protein	Chr1	7478240	7479179	249.4	2494
AT1G21370	transmembrane protein	Chr1	7483795	7484979	225.5	2255
AT1G21380	Target of Myb protein 1	Chr1	7487914	7488668	65.9	659
AT1G21390	EMBRYO DEFECTIVE 2170 (emb2170)	Chr1	7489385	7490671	152.3	1523
AT1G21400	Thiamin diphosphate-binding fold (THDP-binding) superfamily protein	Chr1	7494381	7495272	55.8	558
AT1G21410	(SKP2A)	Chr1	7497051	7497914	179.8	1798
AT1G21440	Phosphoenolpyruvate carboxylase family protein	Chr1	7503190	7504341	228.3	2283
AT1G21450	SCARECROW-LIKE 1 (SCL1)	Chr1	7508989	7510411	189.3	1893
AT1G21480	Exostosin family protein	Chr1	7520532	7521596	262.5	2625
AT1G21520	hypothetical protein	Chr1	7534228	7534934	169.2	1692
AT1G21550	Calcium-binding EF-hand family protein	Chr1	7553328	7553894	59.9	599
AT1G21560	hypothetical protein	Chr1	7554726	7555524	169.9	1699
AT1G21580	Zinc finger C-x8-C-x5-C-x3-H type family protein	Chr1	7564669	7565806	239.3	2393
AT1G21590	kinase with adenine nucleotide alpha hydrolases-like domain-containing protein	Chr1	7568906	7569902	93.4	934
AT1G21600	PLASTID TRANSCRIPTIONALLY ACTIVE 6 (PTAC6)	Chr1	7572834	7574793	179.8	1798
AT1G21610	UBINUCLEIN 1; UBN1	Chr1	7572834	7574793	171.7	1717
AT1G21630	Calcium-binding EF hand family protein	Chr1	7581003	7582061	300.1	3001
AT1G21640	NAD KINASE 2 (NADK2)	Chr1	7588417	7589535	281.9	2819
AT1G21650	(SECA2)	Chr1	7599900	7600773	103	1030
AT1G21651	zinc ion binding protein	Chr1	7603335	7604375	171	1710
AT1G21660	Chaperone DnaJ-domain superfamily protein	Chr1	7605597	7606674	165.2	1652
AT1G21670	DPP6 amino-terminal domain protein	Chr1	7610424	7612103	81.9	819
AT1G21680	DPP6 N-terminal domain-like protein	Chr1	7612979	7614530	98.5	985
AT1G21690	EMBRYO DEFECTIVE 1968 (emb1968)	Chr1	7615628	7616252	53.2	532
AT1G21695	hydroxyproline-rich glycoprotein family protein	Chr1	7619134	7619875	134.7	1347
AT1G21700	SWITCH/SUCROSE NONFERMENTING 3C (SWI3C)	Chr1	7623174	7624197	127.9	1279
AT1G21720	PROTEASOME BETA SUBUNIT C1 (PBC1)	Chr1	7626303	7627150	102.6	1026
AT1G21730	KIN7.1; KINESIN 7.1	Chr1	7630129	7631153	235.5	2355
AT1G21740	DUF630 family protein%2C putative (DUF630 and DUF632)	Chr1	7641077	7643048	153.1	1531
AT1G21750	PDI-LIKE 1-1 (PDIL1-1)	Chr1	7645646	7647050	69.7	697
AT1G21770	Acyl-CoA N-acyltransferases (NAT) superfamily protein	Chr1	7651624	7653070	79.5	795
AT1G21780	BTB/POZ domain-containing protein	Chr1	7651624	7653070	79.5	795
AT1G21790	TRAM%2C LAG1 and CLN8 (TLC) lipid-sensing domain containing protein	Chr1	7654140	7654994	152.7	1527
AT1G21830	hypothetical protein	Chr1	7661377	7662695	53.7	537
AT1G21840	UREASE ACCESSORY PROTEIN F (UREF)	Chr1	7666366	7667616	190	1900
AT1G21860	SKU5 SIMILAR 7 (sks7)	Chr1	7672726	7673310	70.8	708
AT1G21880	LYSM DOMAIN GPI-ANCHORED PROTEIN 1 PRECURSOR (LYM1)	Chr1	7680347	7681680	323.9	3239
AT1G21900	P24 SUBFAMILY DELTA 5; P24DELTA5	Chr1	7691249	7692460	184.4	1844
AT1G21910	DEHYDRATION RESPONSE ELEMENT-BINDING PROTEIN 26 (DREB26)	Chr1	7696428	7697535	202.8	2028
AT1G21920	Histone H3 K4-specific methyltransferase SET7/9 family protein	Chr1	7704506	7706244	276.4	2764
AT1G21930	transmembrane protein	Chr1	7712800	7713408	60.3	603
AT1G21940	transmembrane protein	Chr1	7715058	7715725	134.4	1344
AT1G21950	transmembrane protein	Chr1	7723283	7724017	201.3	2013
AT1G21980	PHOSPHATIDYLINOSITOL-4-PHOSPHATE 5-KINASE 1 (PIP5K1)	Chr1	7734734	7736788	218.7	2187
AT1G21990	F-box/RNI-like/FBD-like domains-containing protein	Chr1	7740493	7742178	48.7	487
AT1G22000	LOW protein: F-box/FBD/LRR-like protein	Chr1	7744106	7744648	41.5	415
AT1G22020	SERINE HYDROXYMETHYLTRANSFERASE 6 (SHM6)	Chr1	7754185	7755637	277.4	2774
AT1G22030	BPS1-like protein	Chr1	7759312	7760643	263.6	2636
AT1G22040	Galactose oxidase/kelch repeat superfamily protein	Chr1	7767895	7768928	202.8	2028
AT1G22050	MEMBRANE-ANCHORED UBIQUITIN-FOLD PROTEIN 6 PRECURSOR (MUB6)	Chr1	7771600	7772442	111.7	1117
AT1G22060	sporulation-specific protein	Chr1	7780516	7781619	238.8	2388
AT1G22070	TGA1A-RELATED GENE 3 (TGA3)	Chr1	7789419	7790459	151.2	1512
AT1G22110	structural constituent of ribosome	Chr1	7801554	7802641	295.3	2953
AT1G22140	zinc finger CCCH domain protein	Chr1	7814755	7815713	193.5	1935
AT1G22160	senescence-associated family protein (DUF581)	Chr1	7823137	7823808	56.1	561
AT1G22170	Phosphoglycerate mutase family protein	Chr1	7826210	7827341	101	1010
AT1G22180	Sec14p-like phosphatidylinositol transfer family protein	Chr1	7829245	7830393	96.1	961
AT1G22190	RAP2.4; RELATED TO AP2 4; WIND2	Chr1	7835983	7837256	203.5	2035
AT1G22200	Endoplasmic reticulum vesicle transporter protein	Chr1	7839829	7840829	125.2	1252
AT1G22220	AUXIN UP-REGULATED F-BOX PROTEIN 2 (AUF2)	Chr1	7846498	7847669	265.5	2655
AT1G22230	nucleolar GTP-binding protein	Chr1	7849911	7851001	158	1580
AT1G22240	PUMILIO 8 (PUM8)	Chr1	7852978	7853512	41	410
AT1G22260	(ZYP1a)	Chr1	7864650	7866467	119.1	1191
AT1G22270	Trm112p-like protein	Chr1	7864650	7866467	220.1	2201
AT1G22275	(ZYP1b)	Chr1	7867013	7867641	115	1150
AT1G22280	PHYTOCHROME-ASSOCIATED PROTEIN PHOSPHATASE TYPE 2C (PAPP2C)	Chr1	7873989	7875585	235.1	2351
AT1G22300	GENERAL REGULATORY FACTOR 10 (GRF10)	Chr1	7880121	7881282	156	1560
AT1G22310	METHYL-CPG-BINDING DOMAIN 8 (MBD8)	Chr1	7882590	7883809	234.4	2344
AT1G22360	UDP-GLUCOSYL TRANSFERASE 85A2 (UGT85A2)	Chr1	7896722	7897643	146.5	1465
AT1G22370	UDP-GLUCOSYL TRANSFERASE 85A5 (UGT85A5)	Chr1	7898167	7899051	101.4	1014
AT1G22400	(UGT85A1)	Chr1	7905942	7906712	94.4	944
AT1G22403		Chr1	7908710	7909674	132.1	1321
AT1G22410	Class-II DAHP synthetase family protein	Chr1	7911926	7913922	199.6	1996
AT1G22440	Zinc-binding alcohol dehydrogenase family protein	Chr1	7922388	7923505	118.5	1185
AT1G22450	CYTOCHROME C OXIDASE 6B (COX6B)	Chr1	7925217	7926339	184.9	1849
AT1G22470	hypothetical protein	Chr1	7932844	7933466	69.7	697
AT1G22490	basic helix-loop-helix (bHLH) DNA-binding superfamily protein	Chr1	7939785	7940749	223.1	2231
AT1G22510	E3 ubiquitin-protein ligase RNF170-like protein (DUF 1232)	Chr1	7951820	7952735	132.8	1328
AT1G22520	MICOS complex subunit Mic10-like protein (DUF543)	Chr1	7953712	7954445	91.9	919
AT1G22530	PATELLIN 2 (PATL2)	Chr1	7956687	7958524	190.2	1902
AT1G22540	NPF5.10	Chr1	7963861	7965194	258.6	2586
AT1G22570	Major facilitator superfamily protein	Chr1	7977765	7978692	46.5	465
AT1G22600	Late embryogenesis abundant protein (LEA) family protein	Chr1	7988415	7989210	88.2	882
AT1G22610	C2 calcium/lipid-binding plant phosphoribosyltransferase family protein	Chr1	7994296	7996656	211.7	2117
AT1G22620	SUPPRESSOR OF ACTIN 1 (ATSAC1)	Chr1	8002124	8002929	158.5	1585
AT1G22640	MYB DOMAIN PROTEIN 3 (MYB3)	Chr1	8006104	8007285	188.6	1886
AT1G22650	ALKALINE/NEUTRAL INVERTASE D (A/N-InvD)	Chr1	8014078	8015833	44.1	441
AT1G22660	Polynucleotide adenylyltransferase family protein	Chr1	8017246	8018382	278.2	2782
AT1G22680	hypothetical protein	Chr1	8025462	8026055	69.7	697
AT1G22700	Tetratricopeptide repeat (TPR)-like superfamily protein	Chr1	8029013	8030078	204.2	2042
AT1G22730	MA3 domain-containing protein	Chr1	8046069	8047707	156.6	1566
AT1G22750	transmembrane protein	Chr1	8050730	8051604	78.7	787
AT1G22770	GIGANTEA (GI)	Chr1	8061781	8063025	169.2	1692
AT1G22780	POINTED FIRST LEAVES (PFL)	Chr1	8067838	8068957	142.6	1426
AT1G22790	Low affinity potassium transport system protein	Chr1	8069405	8070465	71.4	714
AT1G22800	S-adenosyl-L-methionine-dependent methyltransferases superfamily protein	Chr1	8071887	8072744	99.5	995
AT1G22810	ATERF019; ERF019	Chr1	8074484	8074965	53.5	535
AT1G22830	Tetratricopeptide repeat (TPR)-like superfamily protein	Chr1	8076629	8077626	121.5	1215
AT1G22840	CYTOCHROME C-1 (CYTC-1)	Chr1	8079306	8080197	46.6	466
AT1G22850	SNARE associated Golgi protein family	Chr1	8082013	8083047	158.4	1584
AT1G22860	Vacuolar sorting protein 39	Chr1	8083199	8084316	166.6	1666
AT1G22870	kinase family with ARM repeat domain-containing protein	Chr1	8089157	8090557	323.9	3239
AT1G22880	CELLULASE 5 (CEL5)	Chr1	8096819	8097699	192.9	1929
AT1G22882	ATSUN3; SUN-DOMAIN PROTEIN 3; SUN3	Chr1	8098571	8100199	162.5	1625
AT1G22910	RNA-binding (RRM/RBD/RNP motifs) family protein	Chr1	8105620	8106379	69.2	692
AT1G22920	COP9 SIGNALOSOME 5A (CSN5A)	Chr1	8110694	8112134	306.4	3064
AT1G22930	T-complex protein 11	Chr1	8117359	8119443	201.3	2013
AT1G22940	THIAMINE REQUIRING 1 (TH1)	Chr1	8122317	8123020	86.2	862
AT1G22950	2-oxoglutarate (2OG) and Fe(II)-dependent oxygenase superfamily protein	Chr1	8126349	8127270	135.7	1357
AT1G22960	Pentatricopeptide repeat (PPR) superfamily protein	Chr1	8129380	8130398	141.5	1415
AT1G22970	cyclin-D1-binding protein	Chr1	8131522	8132235	61.8	618
AT1G22985	CYTOKININ RESPONSE FACTOR 7 (CRF7)	Chr1	8134863	8135979	183.7	1837
AT1G22990	HEAVY METAL ASSOCIATED ISOPRENYLATED PLANT PROTEIN 22 (HIPP22)	Chr1	8139578	8140156	52.8	528
AT1G23020	FERRIC REDUCTION OXIDASE 3 (FRO3)	Chr1	8152679	8153545	78.7	787
AT1G23030	PLANT U-BOX PROTEIN 11; PUB11	Chr1	8156543	8157972	255.2	2552
AT1G23040	hydroxyproline-rich glycoprotein family protein	Chr1	8164848	8165732	244.1	2441
AT1G23050	hydroxyproline-rich glycoprotein family protein	Chr1	8168628	8169150	53.3	533
AT1G23052		Chr1	8168628	8169150	53.3	533
AT1G23080	PIN-FORMED 7 (PIN7)	Chr1	8181491	8183646	257.5	2575
AT1G23100	GroES-like family protein	Chr1	8195690	8196583	175.4	1754
AT1G23140	C2-DOMAIN ABA-RELATED8; CAR8	Chr1	8202417	8203367	144.8	1448
AT1G23150	hypothetical protein	Chr1	8206435	8207638	216.8	2168
AT1G23170	transmembrane protein (Protein of unknown function DUF2359%2C transmembrane)	Chr1	8212578	8213669	249.3	2493
AT1G23180	ARM repeat superfamily protein	Chr1	8215272	8216861	138.2	1382
AT1G23190	PHOSPHOGLUCOMUTASE 3 (PGM3)	Chr1	8219765	8220798	134.7	1347
AT1G23200	Plant invertase/pectin methylesterase inhibitor superfamily	Chr1	8228657	8229426	196.3	1963
AT1G23201	GCK domain protein	Chr1	8230166	8230708	50.1	501
AT1G23220	Dynein light chain type 1 family protein	Chr1	8242401	8243386	173.4	1734
AT1G23230	mediator of RNA polymerase II transcription subunit	Chr1	8243894	8245495	174.9	1749
AT1G23260	MMS ZWEI HOMOLOGUE 1 (MMZ1)	Chr1	8257846	8258748	158	1580
AT1G23280	MAK16 protein-like protein	Chr1	8262016	8264060	137.3	1373
AT1G23290	(RPL27AB)	Chr1	8262016	8264060	201.8	2018
AT1G23310	GLUTAMATE:GLYOXYLATE AMINOTRANSFERASE (GGT1)	Chr1	8270749	8271998	213.6	2136
AT1G23330	alpha/beta-Hydrolases superfamily protein	Chr1	8281306	8282389	151.8	1518
AT1G23360	(MENG)	Chr1	8295923	8297010	212.2	2122
AT1G23380	KNOTTED1-LIKE HOMEOBOX GENE 6 (KNAT6)	Chr1	8301325	8302774	268.6	2686
AT1G23390	Kelch repeat-containing F-box family protein	Chr1	8309550	8310726	228.5	2285
AT1G23400	(CAF2)	Chr1	8313877	8315767	178.8	1788
AT1G23410	Ribosomal protein S27a / Ubiquitin family protein	Chr1	8313877	8315767	163	1630
AT1G23440	Peptidase C15%2C pyroglutamyl peptidase I-like protein	Chr1	8321651	8322339	215.3	2153
AT1G23465	Peptidase S24/S26A/S26B/S26C family protein	Chr1	8329843	8330756	219.5	2195
AT1G23490	ADP-RIBOSYLATION FACTOR 1 (ARF1)	Chr1	8336583	8337921	244.1	2441
AT1G23540	PROLINE-RICH EXTENSIN-LIKE RECEPTOR KINASE 12 (PERK12)	Chr1	8349001	8349855	76	760
AT1G23550	SIMILAR TO RCD ONE 2 (SRO2)	Chr1	8350701	8352067	167.9	1679
AT1G23710	hypothetical protein (DUF1645)	Chr1	8385130	8386412	267.9	2679
AT1G23740	ALKENAL/ONE OXIDOREDUCTASE (AOR)	Chr1	8398864	8399771	162.5	1625
AT1G23760	(JP630)	Chr1	8402338	8403069	68.9	689
AT1G23770	F-box family protein	Chr1	8405842	8406353	52.6	526
AT1G23780	F-box family protein	Chr1	8407405	8408613	254	2540
AT1G23790	dicer-like protein (DUF936)	Chr1	8410010	8410683	40.4	404
AT1G23800	ALDEHYDE DEHYDROGENASE 2B7 (ALDH2B7)	Chr1	8413684	8414996	151.2	1512
AT1G23820	SPERMIDINE SYNTHASE 1 (SPDS1)	Chr1	8420208	8421161	166.2	1662
AT1G23830	transmembrane protein	Chr1	8423079	8424049	84.3	843
AT1G23850	transmembrane protein	Chr1	8426289	8427034	47.4	474
AT1G23860	RS-CONTAINING ZINC FINGER PROTEIN 21 (RSZ21)	Chr1	8428305	8429352	122.9	1229
AT1G23870	TREHALOSE-PHOSPHATASE/SYNTHASE 9 (TPS9)	Chr1	8432189	8433604	98.1	981
AT1G23880	NHL domain-containing protein	Chr1	8436148	8437010	115.1	1151
AT1G23890	NHL domain-containing protein	Chr1	8439964	8440906	143.4	1434
AT1G23900	GAMMA-ADAPTIN 1 (GAMMA-ADAPTIN 1)	Chr1	8441031	8441993	184.1	1841
AT1G23950	hypothetical protein (DUF626)	Chr1	8470386	8471492	117.7	1177
AT1G23960	hypothetical protein (DUF626)	Chr1	8479404	8481041	153	1530
AT1G23970	hypothetical protein (DUF626)	Chr1	8483178	8483875	71.3	713
AT1G23980	RING/U-box superfamily protein	Chr1	8485001	8486135	212.2	2122
AT1G24040	Acyl-CoA N-acyltransferases (NAT) superfamily protein	Chr1	8505696	8507931	224.5	2245
AT1G24050	RNA-processing%2C Lsm domain-containing protein	Chr1	8505696	8507931	228.4	2284
AT1G24095	Putative thiol-disulfide oxidoreductase DCC	Chr1	8523208	8524062	134	1340
AT1G24100	UDP-GLUCOSYL TRANSFERASE 74B1 (UGT74B1)	Chr1	8525681	8527119	194.3	1943
AT1G24120	ARG1-LIKE 1 (ARL1)	Chr1	8531421	8532305	162.3	1623
AT1G24130	Transducin/WD40 repeat-like superfamily protein	Chr1	8534359	8535525	118.3	1183
AT1G24140	Matrixin family protein	Chr1	8536129	8537406	157.9	1579
AT1G24150	FORMIN HOMOLOGUE 4 (FH4)	Chr1	8549273	8551329	258.8	2588
AT1G24160	triadin	Chr1	8555490	8556413	60.5	605
AT1G24170	(LGT9)	Chr1	8557155	8558814	163.5	1635
AT1G24180	IAA-CONJUGATE-RESISTANT 4 (IAR4)	Chr1	8562318	8563596	248.2	2482
AT1G24190	SIN3-LIKE 3 (SNL3)	Chr1	8569597	8570621	159.1	1591
AT1G24210	Paired amphipathic helix (PAH2) superfamily protein	Chr1	8574584	8575235	67.2	672
AT1G24240	Ribosomal protein L19 family protein	Chr1	8586236	8587106	219.5	2195
AT1G24265	bZIP transcription factor%2C putative (DUF1664)	Chr1	8600287	8601354	215.8	2158
AT1G24267	bZIP transcription factor%2C putative (DUF1664)	Chr1	8606379	8607522	206.3	2063
AT1G24280	GLUCOSE-6-PHOSPHATE DEHYDROGENASE 3 (G6PD3)	Chr1	8609263	8610306	141.8	1418
AT1G24290	AAA-type ATPase family protein	Chr1	8613616	8614311	60.3	603
AT1G24300	GYF domain-containing protein	Chr1	8619592	8620709	186.1	1861
AT1G24310	NUP54	Chr1	8623958	8625090	295.4	2954
AT1G24330	ARM repeat superfamily protein	Chr1	8631303	8632221	106.7	1067
AT1G24340	EMBRYO DEFECTIVE 2421 (emb2421)	Chr1	8635030	8636027	190.1	1901
AT1G24350	Acid phosphatase/vanadium-dependent haloperoxidase-related protein	Chr1	8639678	8641854	129.9	1299
AT1G24360	NAD(P)-binding Rossmann-fold superfamily protein	Chr1	8639678	8641854	273.6	2736
AT1G24440	RING/U-box superfamily protein	Chr1	8662058	8663166	127.2	1272
AT1G24450	NUCLEAR FUSION DEFECTIVE 2 (NFD2)	Chr1	8664101	8665065	105.1	1051
AT1G24460	TGN-LOCALIZED SYP41 INTERACTING PROTEIN (TNO1)	Chr1	8665785	8667074	74.8	748
AT1G24480	S-adenosyl-L-methionine-dependent methyltransferases superfamily protein	Chr1	8676573	8677145	46.1	461
AT1G24490	ALBINA 4 (ALB4)	Chr1	8682122	8683190	288.2	2882
AT1G24510	TCP-1/cpn60 chaperonin family protein	Chr1	8687004	8688347	268.2	2682
AT1G24530	Transducin/WD40 repeat-like superfamily protein	Chr1	8693042	8694237	310.4	3104
AT1G24560	paramyosin	Chr1	8702229	8703747	326.3	3263
AT1G24580	RING/U-box superfamily protein	Chr1	8710050	8710726	42.2	422
AT1G24610	Rubisco methyltransferase family protein	Chr1	8721852	8722826	212.1	2121
AT1G24625	ZINC FINGER PROTEIN 7 (ZFP7)	Chr1	8725904	8727157	190.9	1909
AT1G24650	Leucine-rich repeat protein kinase family protein	Chr1	8734396	8735394	157.8	1578
AT1G24706	(THO2)	Chr1	8741838	8743007	315.2	3152
AT1G24764	MICROTUBULE-ASSOCIATED PROTEINS 70-2 (MAP70-2)	Chr1	8762222	8763480	281.4	2814
AT1G24793	LIPID X C1 (LPXC1)	Chr1	8767516	8768510	170.9	1709
AT1G24800	F-box family protein	Chr1	8769570	8771051	227.6	2276
AT1G24822	hypothetical protein	Chr1	8775850	8777328	203.5	2035
AT1G24880	LIPID X C2 (LPXC2)	Chr1	8775850	8777328	203.5	2035
AT1G24881	F-box family protein	Chr1	8783953	8785438	227.1	2271
AT1G25054	LIPID X C3 (LPXC3)	Chr1	8798369	8799868	210	2100
AT1G25055	F-box family protein	Chr1	8806492	8807951	226.9	2269
AT1G25097	hypothetical protein	Chr1	8812747	8814221	224.6	2246
AT1G25098		Chr1	8812747	8814221	224.6	2246
AT1G25145	LIPID X C4 (LPXC4)	Chr1	8818781	8819844	193.4	1934
AT1G25150	F-box family protein	Chr1	8820862	8822313	225.8	2258
AT1G25175		Chr1	8827123	8828617	206.4	2064
AT1G25210	LIPID X C5 (LPXC5)	Chr1	8833158	8834148	192.6	1926
AT1G25211	F-box family protein	Chr1	8835281	8836606	158.8	1588
AT1G25220	ANTHRANILATE SYNTHASE BETA SUBUNIT 1 (ASB1)	Chr1	8838588	8839622	152.9	1529
AT1G25260	Ribosomal protein L10 family protein	Chr1	8854908	8855968	200.6	2006
AT1G25275	thionin-like protein	Chr1	8860640	8862631	104.7	1047
AT1G25280	TUBBY LIKE PROTEIN 10 (TLP10)	Chr1	8864029	8865431	69.7	697
AT1G25290	RHOMBOID-LIKE PROTEIN 10 (RBL10)	Chr1	8867057	8868067	81.7	817
AT1G25320	Leucine-rich repeat protein kinase family protein	Chr1	8877718	8879364	272.5	2725
AT1G25350	OVULE ABORTION 9 (OVA9)	Chr1	8893348	8895206	118.2	1182
AT1G25360	Pentatricopeptide repeat (PPR) superfamily protein	Chr1	8893348	8895206	113.8	1138
AT1G25370	hypothetical protein (DUF1639)	Chr1	8897985	8899124	140.4	1404
AT1G25375	Metallo-hydrolase/oxidoreductase superfamily protein	Chr1	8902294	8904260	113.8	1138
AT1G25380	NAD+ TRANSPORTER 2 (NDT2)	Chr1	8902294	8904260	122.4	1224
AT1G25390	LEAF RUST 10 DISEASE-RESISTANCE LOCUS RECEPTOR- LIKE PROTEIN KINASE-LIKE 4; LRK10L4	Chr1	8907681	8909055	138.2	1382
AT1G25400	transmembrane protein	Chr1	8911481	8912374	103.9	1039
AT1G25420	IST1-LIKE 2; ISTL2	Chr1	8915915	8917012	197.8	1978
AT1G25440	B-box type zinc finger protein with CCT domain-containing protein	Chr1	8934105	8935541	231.3	2313
AT1G25470	CYTOKININ RESPONSE FACTOR 12 (CRF12)	Chr1	8945444	8946678	205.5	2055
AT1G25480	aluminum activated malate transporter family protein	Chr1	8948317	8949175	139.4	1394
AT1G25490	ROOTS CURL IN NPA (RCN1)	Chr1	8951138	8952173	188.5	1885
AT1G25500	Plasma-membrane choline transporter family protein	Chr1	8957020	8958027	132.6	1326
AT1G25510	Eukaryotic aspartyl protease family protein	Chr1	8959315	8960761	156.1	1561
AT1G25520	Uncharacterized protein family (UPF0016)	Chr1	8962062	8962853	136.4	1364
AT1G25540	PHYTOCHROME AND FLOWERING TIME 1 (PFT1)	Chr1	8973942	8974740	155.8	1558
AT1G25550	myb-like transcription factor family protein	Chr1	8976465	8978012	199.2	1992
AT1G25560	TEMPRANILLO 1 (TEM1)	Chr1	8981896	8983172	322.3	3223
AT1G25570	Di-glucose binding protein with Leucine-rich repeat domain-containing protein	Chr1	8993920	8995634	239.2	2392
AT1G25580	SUPPRESSOR OF GAMMA RADIATION 1 (SOG1)	Chr1	8999023	8999860	135.4	1354
AT1G25682	CWC16A	Chr1	9003754	9004695	146	1460
AT1G26090	P-loop containing nucleoside triphosphate hydrolases superfamily protein	Chr1	9020290	9021659	227	2270
AT1G26100	Cytochrome b561/ferric reductase transmembrane protein family	Chr1	9023338	9024091	59.2	592
AT1G26110	DECAPPING 5 (DCP5)	Chr1	9026566	9027804	127.1	1271
AT1G26120	ISOPRENYLCYSTEINE METHYLESTERASE-LIKE 1 (ICME-LIKE1)	Chr1	9030484	9031706	132.7	1327
AT1G26130	ATPase E1-E2 type family protein / haloacid dehalogenase-like hydrolase family protein	Chr1	9033050	9034133	138.4	1384
AT1G26150	PROLINE-RICH EXTENSIN-LIKE RECEPTOR KINASE 10 (PERK10)	Chr1	9042021	9043607	88.8	888
AT1G26160	Metal-dependent phosphohydrolase	Chr1	9046117	9047133	220.6	2206
AT1G26170	ARM repeat superfamily protein	Chr1	9053724	9055574	194.8	1948
AT1G26180	membrane protein	Chr1	9053724	9055574	218.2	2182
AT1G26190	Phosphoribulokinase / Uridine kinase family	Chr1	9059498	9061195	221.8	2218
AT1G26218	SHORT OPEN READING FRAME 14; SORF14	Chr1	9070927	9072449	199.6	1996
AT1G26220	Acyl-CoA N-acyltransferases (NAT) superfamily protein	Chr1	9070927	9072449	199.6	1996
AT1G26230	CHAPERONIN-60BETA4 (CPN60BETA4)	Chr1	9074809	9075307	40.7	407
AT1G26235		Chr1	9075805	9076860	172.7	1727
AT1G26270	Phosphatidylinositol 3- and 4-kinase family protein	Chr1	9090634	9092519	174.2	1742
AT1G26300	BSD domain-containing protein	Chr1	9098185	9099939	271.5	2715
AT1G26330	DNA binding protein	Chr1	9107444	9108209	128.2	1282
AT1G26340	CYTOCHROME B5 ISOFORM A (CB5-A)	Chr1	9113819	9114763	202.8	2028
AT1G26370	RNA helicase family protein	Chr1	9124571	9125671	220.9	2209
AT1G26440	UREIDE PERMEASE 5 (UPS5)	Chr1	9145074	9146129	175.4	1754
AT1G26460	Tetratricopeptide repeat (TPR)-like superfamily protein	Chr1	9151631	9152867	255	2550
AT1G26470	SNRK2-SUBSTRATE 1; SNS1	Chr1	9155045	9155962	126.7	1267
AT1G26500	Pentatricopeptide repeat (PPR) superfamily protein	Chr1	9158279	9159403	200.4	2004
AT1G26520	Cobalamin biosynthesis CobW-like protein	Chr1	9164648	9166368	203	2030
AT1G26530	PIN domain-like family protein	Chr1	9164648	9166368	203	2030
AT1G26540	Agenet domain-containing protein	Chr1	9170195	9171986	127.1	1271
AT1G26550	FKBP-like peptidyl-prolyl cis-trans isomerase family protein	Chr1	9170195	9171986	171.3	1713
AT1G26580	ELM2 domain protein	Chr1	9184674	9186182	215.4	2154
AT1G26620	T-box transcription factor%2C putative (DUF863)	Chr1	9198586	9199704	79.1	791
AT1G26630	FUMONISIN B1-RESISTANT12 (FBR12)	Chr1	9205795	9207083	172.9	1729
AT1G26640	IPK; ISOPENTENYL PHOSPHATE KINASE	Chr1	9209224	9209889	64.1	641
AT1G26650	Son of sevenless protein	Chr1	9210056	9211001	73.8	738
AT1G26660	Prefoldin chaperone subunit family protein	Chr1	9211735	9212421	42	420
AT1G26665	Mediator complex%2C subunit Med10	Chr1	9214138	9214993	59	590
AT1G26670	(VTI1B)	Chr1	9215867	9216720	153.2	1532
AT1G26690	emp24/gp25L/p24 family/GOLD family protein	Chr1	9224868	9225848	239.6	2396
AT1G26730	EXS (ERD1/XPR1/SYG1) family protein	Chr1	9241240	9243598	158.8	1588
AT1G26740	Ribosomal L32p protein family	Chr1	9245952	9247468	103.5	1035
AT1G26750	hypothetical protein	Chr1	9245952	9247468	91.6	916
AT1G26760	SET DOMAIN PROTEIN 35 (SDG35)	Chr1	9249309	9250015	51.5	515
AT1G26770	EXPANSIN A10 (EXPA10)	Chr1	9259598	9261087	194.2	1942
AT1G26800	RING/U-box superfamily protein	Chr1	9285059	9286321	241.8	2418
AT1G26810	GALACTOSYLTRANSFERASE1 (GALT1)	Chr1	9289324	9290074	103.5	1035
AT1G26830	CULLIN 3 (CUL3)	Chr1	9295614	9296728	251.7	2517
AT1G26840	ORIGIN RECOGNITION COMPLEX PROTEIN 6 (ORC6)	Chr1	9298699	9299491	45.6	456
AT1G26850	S-adenosyl-L-methionine-dependent methyltransferases superfamily protein	Chr1	9302648	9304242	176.1	1761
AT1G26880	Ribosomal protein L34e superfamily protein	Chr1	9315750	9316809	196.5	1965
AT1G26900	Pentatricopeptide repeat (PPR) superfamily protein	Chr1	9320518	9322486	187.7	1877
AT1G26910	RIBOSOMAL PROTEIN L10 B (RPL10B)	Chr1	9320518	9322486	146.3	1463
AT1G26920	zinc finger CCHC domain protein	Chr1	9329506	9330671	278.8	2788
AT1G26930	Galactose oxidase/kelch repeat superfamily protein	Chr1	9336230	9337833	302.5	3025
AT1G26940	Cyclophilin-like peptidyl-prolyl cis-trans isomerase family protein	Chr1	9342992	9343925	198.5	1985
AT1G27000	GRIP/coiled-coil protein%2C putative (DUF1664)	Chr1	9373849	9375068	234.3	2343
AT1G27050	homeobox leucine zipper protein	Chr1	9393586	9395690	210.1	2101
AT1G27060	Regulator of chromosome condensation (RCC1) family protein	Chr1	9393586	9395690	108.8	1088
AT1G27070	5'-AMP-activated protein kinase-like protein	Chr1	9398448	9399545	165.2	1652
AT1G27090	glycine-rich protein	Chr1	9404891	9406316	198.8	1988
AT1G27100	Actin cross-linking protein	Chr1	9407788	9408675	129	1290
AT1G27110	Tetratricopeptide repeat (TPR)-like superfamily protein	Chr1	9415263	9416015	104.1	1041
AT1G27120	Galactosyltransferase family protein	Chr1	9421095	9422356	235.4	2354
AT1G27130	GLUTATHIONE S-TRANSFERASE TAU 13 (GSTU13)	Chr1	9425535	9426638	119.2	1192
AT1G27140	GLUTATHIONE S-TRANSFERASE TAU 14 (GSTU14)	Chr1	9427935	9428612	83.6	836
AT1G27150	Tetratricopeptide repeat (TPR)-like superfamily protein	Chr1	9428931	9429754	169.3	1693
AT1G27170	transmembrane receptors / ATP binding protein	Chr1	9434331	9435676	282.9	2829
AT1G27180	disease resistance protein (TIR-NBS-LRR class)	Chr1	9441079	9442199	218.7	2187
AT1G27190	Leucine-rich repeat protein kinase family protein	Chr1	9447642	9448864	211.6	2116
AT1G27200	glycosyltransferase family protein (DUF23)	Chr1	9450127	9451681	170.2	1702
AT1G27210	ARM repeat superfamily protein	Chr1	9456368	9458078	340	3400
AT1G27290	transmembrane protein	Chr1	9481689	9482540	71.7	717
AT1G27310	NUCLEAR TRANSPORT FACTOR 2A (NTF2A)	Chr1	9485028	9485864	89.2	892
AT1G27320	HISTIDINE KINASE 3 (HK3)	Chr1	9487217	9488646	123.9	1239
AT1G27330	Ribosome associated membrane protein RAMP4	Chr1	9492978	9494174	120.1	1201
AT1G27340	LEAF CURLING RESPONSIVENESS (LCR)	Chr1	9495517	9496487	153.2	1532
AT1G27350	Ribosome associated membrane protein RAMP4	Chr1	9498473	9499493	126.7	1267
AT1G27360	SQUAMOSA PROMOTER-LIKE 11 (SPL11)	Chr1	9500890	9501711	125.7	1257
AT1G27370	SQUAMOSA PROMOTER BINDING PROTEIN-LIKE 10 (SPL10)	Chr1	9507495	9508447	176.1	1761
AT1G27385	phosphoribosylformylglycinamidine synthase	Chr1	9512103	9512911	116.1	1161
AT1G27390	TRANSLOCASE OUTER MEMBRANE 20-2 (TOM20-2)	Chr1	9514089	9515036	55.6	556
AT1G27400	Ribosomal protein L22p/L17e family protein	Chr1	9515142	9516204	84	840
AT1G27410	DNA repair metallo-beta-lactamase family protein	Chr1	9517150	9517845	59.5	595
AT1G27420	Galactose oxidase/kelch repeat superfamily protein	Chr1	9519073	9519616	62.6	626
AT1G27430	GYF domain-containing protein	Chr1	9526268	9527249	178	1780
AT1G27435	hypothetical protein	Chr1	9528287	9528940	103.7	1037
AT1G27440	(GUT2)	Chr1	9530562	9531389	88.3	883
AT1G27450	ADENINE PHOSPHORIBOSYL TRANSFERASE 1 (APT1)	Chr1	9531991	9532987	110.3	1103
AT1G27460	NO POLLEN GERMINATION RELATED 1 (NPGR1)	Chr1	9534509	9535318	117.1	1171
AT1G27470	transducin family protein / WD-40 repeat family protein	Chr1	9543084	9544437	312	3120
AT1G27500	Tetratricopeptide repeat (TPR)-like superfamily protein	Chr1	9553306	9554320	127.8	1278
AT1G27510	EXECUTER 2 (EX2)	Chr1	9557507	9559494	198.2	1982
AT1G27520	MANNOSIDASE 5; MNS5	Chr1	9557507	9559494	137	1370
AT1G27530	ubiquitin-fold modifier-conjugating enzyme	Chr1	9563185	9564115	194.2	1942
AT1G27540	F-box protein (DUF295)	Chr1	9566810	9567962	212	2120
AT1G27580	F-box protein (DUF295)	Chr1	9590087	9591152	125.7	1257
AT1G27590		Chr1	9591968	9593085	295	2950
AT1G27600	IRREGULAR XYLEM 9-LIKE (IRX9-L)	Chr1	9604819	9606207	231	2310
AT1G27630	CYCLIN T 1;3 (CYCT1;3)	Chr1	9611118	9612135	126.3	1263
AT1G27650	(ATU2AF35A)	Chr1	9614475	9615896	202.5	2025
AT1G27680	ADPGLC-PPASE LARGE SUBUNIT (APL2)	Chr1	9631167	9632281	192.1	1921
AT1G27690	lipase%2C putative (DUF620)	Chr1	9636523	9637861	178.6	1786
AT1G27695	TGD5; TRIGALACTOSYLDIACYLGLYCEROL 5	Chr1	9638989	9639877	81.9	819
AT1G27700	Syntaxin/t-SNARE family protein	Chr1	9640990	9641938	120.1	1201
AT1G27720	TBP-ASSOCIATED FACTOR 4B (TAF4b)	Chr1	9646454	9647553	163.5	1635
AT1G27730	SALT TOLERANCE ZINC FINGER (STZ)	Chr1	9648176	9649205	278.7	2787
AT1G27750	nucleic acid binding protein	Chr1	9657201	9658221	308.7	3087
AT1G27752	Ubiquitin system component Cue protein	Chr1	9661998	9663165	285.1	2851
AT1G27760	SALT-TOLERANCE 32 (SAT32)	Chr1	9668521	9670414	236.8	2368
AT1G27770	AUTOINHIBITED CA2+-ATPASE 1 (ACA1)	Chr1	9674832	9676289	285.1	2851
AT1G27820	Polynucleotidyl transferase%2C ribonuclease H-like superfamily protein	Chr1	9691492	9692403	58.9	589
AT1G27840	(ATCSA-1)	Chr1	9695471	9696448	192.3	1923
AT1G27850	RUN/FYVE domain protein	Chr1	9698270	9699433	245.3	2453
AT1G27880	DEAD/DEAH box RNA helicase family protein	Chr1	9708753	9710052	326.3	3263
AT1G27890	Polynucleotidyl transferase%2C ribonuclease H-like superfamily protein	Chr1	9714146	9715236	170.6	1706
AT1G27900	RNA helicase family protein	Chr1	9719659	9720700	266	2660
AT1G27910	PLANT U-BOX 45 (PUB45)	Chr1	9723727	9724770	124.4	1244
AT1G27930	glucuronoxylan 4-O-methyltransferase-like protein (DUF579)	Chr1	9731315	9732628	283.3	2833
AT1G27960	EVOLUTIONARILY CONSERVED C-TERMINAL REGION 9 (ECT9)	Chr1	9745014	9745843	124.5	1245
AT1G27970	NUCLEAR TRANSPORT FACTOR 2B (NTF2B)	Chr1	9746757	9748001	191.2	1912
AT1G27980	DIHYDROSPHINGOSINE PHOSPHATE LYASE (DPL1)	Chr1	9748627	9749499	123.8	1238
AT1G28050	B-BOX DOMAIN PROTEIN 13; BBX13	Chr1	9776660	9777890	174.9	1749
AT1G28060	Pre-mRNA-splicing factor 3	Chr1	9779083	9780556	147.9	1479
AT1G28070	ATP-dependent RNA helicase	Chr1	9783023	9783767	43.4	434
AT1G28090	Polynucleotide adenylyltransferase family protein	Chr1	9795661	9796721	260.1	2601
AT1G28100	hypothetical protein	Chr1	9801114	9801821	45.2	452
AT1G28110	SERINE CARBOXYPEPTIDASE-LIKE 45 (SCPL45)	Chr1	9804757	9806966	53.6	536
AT1G28120	ubiquitin thioesterase otubain-like protein	Chr1	9814647	9815633	201.3	2013
AT1G28130	(GH3.17)	Chr1	9825244	9827829	166.5	1665
AT1G28140	integral membrane family protein	Chr1	9833355	9834599	246.8	2468
AT1G28150	hypothetical protein	Chr1	9835119	9836121	156.3	1563
AT1G28190	hypothetical protein	Chr1	9846837	9847972	196.4	1964
AT1G28200	FH INTERACTING PROTEIN 1 (FIP1)	Chr1	9851306	9852479	224.8	2248
AT1G28210	(ATJ1)	Chr1	9854466	9855248	151.4	1514
AT1G28240	strawberry notch protein (DUF616)	Chr1	9871137	9872281	248.8	2488
AT1G28250	transmembrane protein	Chr1	9874205	9874915	97.1	971
AT1G28260	Telomerase activating protein Est1	Chr1	9877612	9879411	152	1520
AT1G28280	VQ motif-containing protein	Chr1	9886231	9887505	221.6	2216
AT1G28290	ARABINOGALACTAN PROTEIN 31 (AGP31)	Chr1	9889200	9890863	61.1	611
AT1G28310	Dof-type zinc finger DNA-binding family protein	Chr1	9912132	9913717	107	1070
AT1G28320	(DEG15)	Chr1	9923316	9924582	236.6	2366
AT1G28330	DORMANCY-ASSOCIATED PROTEIN-LIKE 1 (DYL1)	Chr1	9934036	9935425	271	2710
AT1G28340	RECEPTOR LIKE PROTEIN 4 (RLP4)	Chr1	9939967	9941249	269.9	2699
AT1G28350	Nucleotidylyl transferase superfamily protein	Chr1	9943878	9944745	128.3	1283
AT1G28360	ERF DOMAIN PROTEIN 12 (ERF12)	Chr1	9951681	9952715	297.6	2976
AT1G28370	ERF DOMAIN PROTEIN 11 (ERF11)	Chr1	9956125	9957007	247.9	2479
AT1G28380	NECROTIC SPOTTED LESIONS 1 (NSL1)	Chr1	9963505	9964648	179.7	1797
AT1G28390	Protein kinase superfamily protein	Chr1	9966930	9968318	143.4	1434
AT1G28395	hypothetical protein	Chr1	9970818	9971561	123.6	1236
AT1G28400	GATA zinc finger protein	Chr1	9972647	9973852	169.4	1694
AT1G28410	myosin heavy chain-like protein	Chr1	9978483	9980816	191.8	1918
AT1G28420	HOMEOBOX-1 (HB-1)	Chr1	9978483	9980816	205.5	2055
AT1G28440	HAESA-LIKE 1 (HSL1)	Chr1	9996734	9998744	269.4	2694
AT1G28480	(GRX480)	Chr1	10012803	10014241	218.7	2187
AT1G28490	SYNTAXIN OF PLANTS 61 (SYP61)	Chr1	10015839	10016724	153.2	1532
AT1G28510	Optic atrophy 3 protein (OPA3)	Chr1	10023750	10024708	238.8	2388
AT1G28520	VASCULAR PLANT ONE ZINC FINGER PROTEIN (VOZ1)	Chr1	10029070	10030472	273.3	2733
AT1G28530	ANGULATA 10; ANU10	Chr1	10034704	10036525	246.5	2465
AT1G28540	transmembrane protein	Chr1	10034704	10036525	216.5	2165
AT1G28560	SHOOT REDIFFERENTIATION DEFECTIVE 2 (SRD2)	Chr1	10040688	10041560	204.6	2046
AT1G28580	GDSL-like Lipase/Acylhydrolase superfamily protein	Chr1	10045169	10046538	200.4	2004
AT1G28600	GDSL-like Lipase/Acylhydrolase superfamily protein	Chr1	10051912	10053177	124.5	1245
AT1G28680	HXXXD-type acyl-transferase family protein	Chr1	10078179	10079825	200.2	2002
AT1G28685		Chr1	10078179	10079825	200.2	2002
AT1G28690	Tetratricopeptide repeat (TPR)-like superfamily protein	Chr1	10080882	10081761	135.4	1354
AT1G28760	INNER NUCLEAR MEMBRANE PROTEIN A; NEMP_A	Chr1	10102128	10104582	218.6	2186
AT1G28960	NUDIX HYDROLASE HOMOLOG 15 (NUDX15)	Chr1	10110665	10111776	267.1	2671
AT1G29030	Apoptosis inhibitory protein 5 (API5)	Chr1	10133167	10136015	164.9	1649
AT1G29040	50S ribosomal protein L34	Chr1	10133167	10136015	174.2	1742
AT1G29041	hypothetical protein	Chr1	10133167	10136015	99.5	995
AT1G29050	TRICHOME BIREFRINGENCE-LIKE 38 (TBL38)	Chr1	10138707	10139186	61.4	614
AT1G29060	Target SNARE coiled-coil domain protein	Chr1	10147565	10149184	244.6	2446
AT1G29070	Ribosomal protein L34	Chr1	10149678	10150505	190.5	1905
AT1G29120	UP9	Chr1	10174148	10175347	259.4	2594
AT1G29150	NON-ATPASE SUBUNIT 9 (ATS9)	Chr1	10180468	10181819	96.5	965
AT1G29160	Dof-type zinc finger DNA-binding family protein	Chr1	10183341	10184469	261.9	2619
AT1G29170	(WAVE2)	Chr1	10194110	10195299	233.6	2336
AT1G29195	phosphatidylinositol 4-phosphate 5-kinase MSS4-like protein	Chr1	10202416	10203473	266.8	2668
AT1G29220	transcriptional regulator family protein	Chr1	10211701	10212807	293	2930
AT1G29230	CBL-INTERACTING PROTEIN KINASE 18 (CIPK18)	Chr1	10214751	10215559	52.6	526
AT1G29240	transcription initiation factor TFIID subunit%2C putative (DUF688)	Chr1	10219068	10219901	120.2	1202
AT1G29250	Alba DNA/RNA-binding protein	Chr1	10223833	10225905	119.4	1194
AT1G29260	PEROXIN 7 (PEX7)	Chr1	10223833	10225905	310	3100
AT1G29280	WRKY DNA-BINDING PROTEIN 65 (WRKY65)	Chr1	10236347	10237656	278.8	2788
AT1G29290	B-cell lymphoma 6 protein	Chr1	10244935	10246596	134.2	1342
AT1G29300	UNFERTILIZED EMBRYO SAC 1 (UNE1)	Chr1	10248143	10249567	103.3	1033
AT1G29310	SecY protein transport family protein	Chr1	10252314	10254138	103.6	1036
AT1G29320	Transducin/WD40 repeat-like superfamily protein	Chr1	10255238	10255978	103.8	1038
AT1G29330	ENDOPLASMIC RETICULUM RETENTION DEFECTIVE 2 (ERD2)	Chr1	10260168	10261165	174.3	1743
AT1G29340	PLANT U-BOX 17 (PUB17)	Chr1	10264201	10265701	219.6	2196
AT1G29350	RNA polymerase II degradation factor-like protein (DUF1296)	Chr1	10273005	10273877	177.5	1775
AT1G29355	hypothetical protein	Chr1	10274336	10275817	189	1890
AT1G29357		Chr1	10274336	10275817	189	1890
AT1G29370	RNA polymerase II degradation factor-like protein (DUF1296)	Chr1	10282260	10283308	244	2440
AT1G29390	COLD REGULATED 314 THYLAKOID MEMBRANE 2 (COR314-TM2)	Chr1	10287080	10288008	174.7	1747
AT1G29400	MEI2-LIKE PROTEIN 5 (ML5)	Chr1	10291887	10294523	203	2030
AT1G29410	PHOSPHORIBOSYLANTHRANILATE ISOMERASE 3 (PAI3)	Chr1	10299164	10301789	138.5	1385
AT1G29465	transmembrane protein	Chr1	10308456	10309569	175.4	1754
AT1G29470	S-adenosyl-L-methionine-dependent methyltransferases superfamily protein	Chr1	10312891	10314064	190.7	1907
AT1G29530	hypothetical protein	Chr1	10325980	10326941	151.2	1512
AT1G29550	Eukaryotic initiation factor 4E protein	Chr1	10330338	10331217	222.4	2224
AT1G29590	EUKARYOTIC TRANSLATION INITIATION FACTOR 4E3 (eIF4E3)	Chr1	10339865	10340774	247.9	2479
AT1G29630	5'-3' exonuclease family protein	Chr1	10349355	10350181	204.2	2042
AT1G29640	senescence regulator (Protein of unknown function%2C DUF584)	Chr1	10355616	10356584	260.9	2609
AT1G29690	CONSTITUTIVELY ACTIVATED CELL DEATH 1 (CAD1)	Chr1	10380713	10382120	259.4	2594
AT1G29710	Tetratricopeptide repeat (TPR)-like superfamily protein	Chr1	10387086	10388604	225.4	2254
AT1G29740	Leucine-rich repeat transmembrane protein kinase	Chr1	10407105	10408541	135.1	1351
AT1G29750	RECEPTOR-LIKE KINASE IN FLOWERS 1 (RKF1)	Chr1	10419696	10420670	120.7	1207
AT1G29760	SEIPIN2	Chr1	10422244	10423589	262.2	2622
AT1G29785		Chr1	10428388	10429178	156.4	1564
AT1G29790	S-adenosyl-L-methionine-dependent methyltransferases superfamily protein	Chr1	10429847	10431256	171.4	1714
AT1G29810	Transcriptional coactivator/pterin dehydratase	Chr1	10436543	10438119	114.7	1147
AT1G29840	alpha/beta-Hydrolases superfamily protein	Chr1	10446582	10448443	187.2	1872
AT1G29850	double-stranded DNA-binding family protein	Chr1	10446582	10448443	124.5	1245
AT1G29880	glycyl-tRNA synthetase / glycine-tRNA ligase	Chr1	10461767	10462940	271.1	2711
AT1G29890	REDUCED WALL ACETYLATION 4 (RWA4)	Chr1	10463208	10464056	138.7	1387
AT1G29900	CARBAMOYL PHOSPHATE SYNTHETASE B (CARB)	Chr1	10467972	10469637	242.9	2429
AT1G29930	CHLOROPHYLL A/B BINDING PROTEIN 1 (CAB1)	Chr1	10477924	10478924	108.8	1088
AT1G29940	NUCLEAR RNA POLYMERASE A2 (NRPA2)	Chr1	10485689	10486926	225.4	2254
AT1G29950	SACL3	Chr1	10491569	10493596	121.1	1211
AT1G29960	Peptidase S24/S26A/S26B/S26C family protein	Chr1	10494658	10495383	104.2	1042
AT1G29965	Ribosomal protein L18ae/LX family protein	Chr1	10498453	10499460	102.3	1023
AT1G29970	60S RIBOSOMAL PROTEIN L18A-1 (RPL18AA)	Chr1	10498453	10499460	102.3	1023
AT1G29980	choice-of-anchor C domain protein%2C putative (Protein of unknown function%2C DUF642)	Chr1	10505598	10506205	67.1	671
AT1G29990	PREFOLDIN 6 (PFD6)	Chr1	10507595	10508358	118.1	1181
AT1G30000	ALPHA-MANNOSIDASE 3 (MNS3)	Chr1	10511722	10512530	150.3	1503
AT1G30010	NUCLEAR MATURASE 1 (NMAT1)	Chr1	10513151	10514246	280.6	2806
AT1G30040	GIBBERELLIN 2-OXIDASE (GA2OX2)	Chr1	10537563	10538876	254	2540
AT1G30070	SGS domain-containing protein	Chr1	10547156	10548277	199.9	1999
AT1G30090	Galactose oxidase/kelch repeat superfamily protein	Chr1	10560518	10561507	171.3	1713
AT1G30100	NINE-CIS-EPOXYCAROTENOID DIOXYGENASE 5 (NCED5)	Chr1	10571223	10572874	283.5	2835
AT1G30110	NUDIX HYDROLASE HOMOLOG 25 (NUDX25)	Chr1	10582119	10582941	75.4	754
AT1G30120	PYRUVATE DEHYDROGENASE E1 BETA (PDH-E1 BETA)	Chr1	10585805	10586669	167.2	1672
AT1G30130	DUF1365 family protein	Chr1	10587505	10588581	257.2	2572
AT1G30135	JASMONATE-ZIM-DOMAIN PROTEIN 8 (JAZ8)	Chr1	10596388	10597251	96.1	961
AT1G30160	hypothetical protein (DUF295)	Chr1	10606177	10607103	126.3	1263
AT1G30200	F-box family protein	Chr1	10624932	10626416	255.8	2558
AT1G30210	TEOSINTE BRANCHED 1, CYCLOIDEA, AND PCF FAMILY 24 (TCP24)	Chr1	10629693	10630669	120.4	1204
AT1G30230	EUKARYOTIC ELONGATION FACTOR 1B BETA 1 (EEF-1BB1)	Chr1	10638807	10639952	210.7	2107
AT1G30240	proline-%2C glutamic acid/leucine-rich protein	Chr1	10645099	10646076	253.2	2532
AT1G30260	galactosyltransferase family protein	Chr1	10650998	10651527	56.1	561
AT1G30270	CBL-INTERACTING PROTEIN KINASE 23 (CIPK23)	Chr1	10654802	10656515	266.3	2663
AT1G30280	Chaperone DnaJ-domain superfamily protein	Chr1	10663380	10664725	224.6	2246
AT1G30282		Chr1	10663380	10664725	224.6	2246
AT1G30290	Tetratricopeptide repeat (TPR)-like superfamily protein	Chr1	10671842	10673844	212.1	2121
AT1G30300	Metallo-hydrolase/oxidoreductase superfamily protein	Chr1	10671842	10673844	233.4	2334
AT1G30320	Remorin family protein	Chr1	10680118	10681696	184.4	1844
AT1G30330	AUXIN RESPONSE FACTOR 6 (ARF6)	Chr1	10689419	10690888	250.9	2509
AT1G30360	EARLY-RESPONSIVE TO DEHYDRATION 4 (ERD4)	Chr1	10715558	10716783	287.4	2874
AT1G30400	ATP-BINDING CASSETTE C1 (ABCC1)	Chr1	10727403	10729309	248.8	2488
AT1G30410	ATP-BINDING CASSETTE C12 (ABCC12)	Chr1	10738668	10739696	142.7	1427
AT1G30440	Phototropic-responsive NPH3 family protein	Chr1	10758931	10760538	172.6	1726
AT1G30450	CATION-CHLORIDE CO-TRANSPORTER 1 (CCC1)	Chr1	10762657	10763610	212.8	2128
AT1G30460	CLEAVAGE AND POLYADENYLATION SPECIFICITY FACTOR 30 (CPSF30)	Chr1	10774382	10775540	166.4	1664
AT1G30470	SIT4 phosphatase-associated family protein	Chr1	10779080	10780133	286.6	2866
AT1G30475	hypothetical protein	Chr1	10789137	10791456	41.9	419
AT1G30480	DNA-DAMAGE-REPAIR/TOLERATION PROTEIN 111 (DRT111)	Chr1	10789137	10791456	275.8	2758
AT1G30490	PHAVOLUTA (PHV)	Chr1	10799425	10801127	265.5	2655
AT1G30510	ROOT FNR 2 (RFNR2)	Chr1	10807275	10809905	123.8	1238
AT1G30515	GATA zinc finger protein	Chr1	10807275	10809905	72.7	727
AT1G30520	ACYL-ACTIVATING ENZYME 14 (AAE14)	Chr1	10810875	10811451	114.9	1149
AT1G30530	UDP-GLUCOSYL TRANSFERASE 78D1 (UGT78D1)	Chr1	10814771	10815549	158.7	1587
AT1G30540	Actin-like ATPase superfamily protein	Chr1	10818419	10819401	213.2	2132
AT1G30550	S-adenosyl-L-methionine-dependent methyltransferase superfamily protein	Chr1	10821181	10822139	196.3	1963
AT1G30580	GTP binding protein	Chr1	10834607	10835655	169.1	1691
AT1G30590	RNA polymerase I specific transcription initiation factor RRN3 protein	Chr1	10839184	10840750	155.9	1559
AT1G30600	Subtilase family protein	Chr1	10844108	10845133	130.6	1306
AT1G30610	EMBRYO DEFECTIVE 2279 (emb2279)	Chr1	10846525	10847685	152.8	1528
AT1G30620	MURUS 4 (MUR4)	Chr1	10854565	10856050	202	2020
AT1G30630	Coatomer epsilon subunit	Chr1	10859346	10860309	159.9	1599
AT1G30640	Protein kinase family protein	Chr1	10860612	10861675	155	1550
AT1G30650	WRKY DNA-BINDING PROTEIN 14 (WRKY14)	Chr1	10868285	10869448	251.7	2517
AT1G30660	nucleic acid binding protein	Chr1	10876625	10877499	235.1	2351
AT1G30680	toprim domain-containing protein	Chr1	10881431	10882432	259.4	2594
AT1G30690	Sec14p-like phosphatidylinositol transfer family protein	Chr1	10887639	10888785	90.5	905
AT1G30700	FAD-binding Berberine family protein	Chr1	10892571	10894278	174.7	1747
AT1G30720	FAD-binding Berberine family protein	Chr1	10898200	10899382	119.2	1192
AT1G30730	ATBBE11	Chr1	10900852	10901980	161	1610
AT1G30740	ATBBE12	Chr1	10903048	10903883	115.1	1151
AT1G30755	elongation factor G%2C putative (DUF668)	Chr1	10907566	10909682	168	1680
AT1G30757	transmembrane protein	Chr1	10907566	10909682	177.6	1776
AT1G30760	ATBBE-LIKE 13; BERBERINE BRIDGE ENZYME-LIKE 13	Chr1	10919035	10919821	224.6	2246
AT1G30780	F-box associated ubiquitination effector family protein	Chr1	10925176	10925748	54.7	547
AT1G30800	Fasciclin-like arabinogalactan family protein	Chr1	10936876	10937906	227.6	2276
AT1G30810	JUMONJI DOMAIN-CONTAINING PROTEIN 18 (JMJ18)	Chr1	10936876	10937906	227.6	2276
AT1G30820	CTP synthase family protein	Chr1	10947363	10949471	209.3	2093
AT1G30825	DISTORTED TRICHOMES 2 (DIS2)	Chr1	10960839	10961764	178.1	1781
AT1G30840	PURINE PERMEASE 4 (PUP4)	Chr1	10974537	10975694	88.8	888
AT1G30845	cell growth defect protein	Chr1	10979563	10980499	156.5	1565
AT1G30860	RING/U-box superfamily protein	Chr1	10988416	10989511	207.8	2078
AT1G30880	hypothetical protein	Chr1	10993430	10994958	197.6	1976
AT1G30890	Integral membrane HRF1 family protein	Chr1	10993430	10994958	113.5	1135
AT1G30900	VACUOLAR SORTING RECEPTOR 6 (VSR6)	Chr1	10997126	10997654	53.1	531
AT1G30910	Molybdenum cofactor sulfurase family protein	Chr1	11000810	11001715	136.3	1363
AT1G30920	F-box family protein	Chr1	11004793	11005576	94.4	944
AT1G30960	ERA-2	Chr1	11039065	11040164	249.1	2491
AT1G30970	SUPPRESSOR OF FRIGIDA4 (SUF4)	Chr1	11042881	11043817	219.2	2192
AT1G31010	ORGANELLAR SINGLE-STRANDED DNA BINDING PROTEIN 4 (OSB4)	Chr1	11055966	11057912	248.7	2487
AT1G31020	THIOREDOXIN O2 (TO2)	Chr1	11055966	11057912	155.8	1558
AT1G31070	N-ACETYLGLUCOSAMINE-1-PHOSPHATE URIDYLYLTRANSFERASE 1 (GlcNAc1pUT1)	Chr1	11084732	11085606	166.5	1665
AT1G31120	K+ UPTAKE PERMEASE 10 (KUP10)	Chr1	11106969	11108151	158.5	1585
AT1G31130	polyadenylate-binding protein 1-B-binding protein	Chr1	11114839	11116083	291	2910
AT1G31150	K-box region protein (DUF1985)	Chr1	11119818	11120725	155.2	1552
AT1G31160	HISTIDINE TRIAD NUCLEOTIDE-BINDING 2 (HINT 2)	Chr1	11122848	11124300	214.2	2142
AT1G31170	SULFIREDOXIN (SRX)	Chr1	11133252	11134558	199.9	1999
AT1G31175	cytochrome C oxidase biogenesis Cmc1-like protein	Chr1	11140511	11141279	159.3	1593
AT1G31180	ISOPROPYLMALATE DEHYDROGENASE 3 (IMD3)	Chr1	11143529	11145526	166.5	1665
AT1G31190	MYO-INOSITOL MONOPHOSPHATASE LIKE 1 (IMPL1)	Chr1	11143529	11145526	148.2	1482
AT1G31220	Formyl transferase	Chr1	11156634	11157751	318.4	3184
AT1G31230	ASPARTATE KINASE-HOMOSERINE DEHYDROGENASE I (AK-HSDH I)	Chr1	11162392	11163343	190.6	1906
AT1G31240	Bromodomain transcription factor	Chr1	11163959	11165034	269.7	2697
AT1G31258		Chr1	11170873	11171777	197.8	1978
AT1G31280	ARGONAUTE 2 (AGO2)	Chr1	11181523	11183210	322.1	3221
AT1G31290	ARGONAUTE 3 (AGO3)	Chr1	11188057	11190430	211.8	2118
AT1G31300	TRAM%2C LAG1 and CLN8 (TLC) lipid-sensing domain containing protein	Chr1	11193599	11194628	173.5	1735
AT1G31320	LOB DOMAIN-CONTAINING PROTEIN 4 (LBD4)	Chr1	11212887	11214150	139.2	1392
AT1G31330	PHOTOSYSTEM I SUBUNIT F (PSAF)	Chr1	11214959	11216084	148.4	1484
AT1G31340	RELATED TO UBIQUITIN 1 (RUB1)	Chr1	11218706	11219488	83.5	835
AT1G31350	KAR-UP F-BOX 1 (KUF1)	Chr1	11221538	11222839	260.2	2602
AT1G31360	RECQ HELICASE L2 (RECQL2)	Chr1	11232233	11233236	188.6	1886
AT1G31410	ENF2; ENLARGED FIL EXPRESSION DOMAIN 2	Chr1	11248350	11250573	261.3	2613
AT1G31420	FEI 1 (FEI1)	Chr1	11248350	11250573	194.7	1947
AT1G31440	SH3 domain-containing protein	Chr1	11255325	11256911	45.2	452
AT1G31460	vitellogenin-2 protein	Chr1	11261699	11262727	130.7	1307
AT1G31470	NUCLEAR FUSION DEFECTIVE 4 (NFD4)	Chr1	11264097	11265077	165.9	1659
AT1G31480	SHOOT GRAVITROPISM 2 (SGR2)	Chr1	11265848	11266701	117.4	1174
AT1G31500	HESP; HESPERIN	Chr1	11275863	11276662	130.7	1307
AT1G31540	Disease resistance protein (TIR-NBS-LRR class) family	Chr1	11291530	11293865	217.1	2171
AT1G31600	TRNA METHYLTRANSFERASE 9 (TRM9)	Chr1	11315756	11316567	162.5	1625
AT1G31650	RHO GUANYL-NUCLEOTIDE EXCHANGE FACTOR 14 (ROPGEF14)	Chr1	11327641	11328524	70.3	703
AT1G31660	bystin-like protein	Chr1	11332481	11333615	294.7	2947
AT1G31730	ADAPTOR PROTEIN COMPLEX 4E; AP4E	Chr1	11359525	11361125	289.7	2897
AT1G31760	SWIB/MDM2 domain superfamily protein	Chr1	11372861	11373566	142	1420
AT1G31770	ATP-BINDING CASSETTE G14 (ABCG14)	Chr1	11375735	11377845	81.2	812
AT1G31780	oligomeric golgi complex subunit	Chr1	11391093	11392239	256	2560
AT1G31790	Tetratricopeptide repeat (TPR)-like superfamily protein	Chr1	11395183	11396069	112.6	1126
AT1G31800	"CYTOCHROME P450, FAMILY 97, SUBFAMILY A, POLYPEPTIDE 3" (CYP97A3)	Chr1	11396279	11397269	207.6	2076
AT1G31810	FORMIN HOMOLOGY 14 (AFH14)	Chr1	11405258	11406348	195.6	1956
AT1G31814	FRIGIDA LIKE 2 (FRL2)	Chr1	11412785	11414491	139	1390
AT1G31817	NUCLEAR FUSION DEFECTIVE 3 (NFD3)	Chr1	11415813	11416391	45.7	457
AT1G31830	POLYAMINE UPTAKE TRANSPORTER 2 (PUT2)	Chr1	11419960	11420817	49.4	494
AT1G31835	hypothetical protein	Chr1	11422851	11423769	160.6	1606
AT1G31840	Tetratricopeptide repeat (TPR)-like superfamily protein	Chr1	11423916	11424911	162.5	1625
[truncated: 14,166 more rows]
